# Supplementary material for: Global, regional, and national life expectancy, all-cause mortality, and cause-specific mortality for 249 causes of death, 1980–2015: a systematic analysis for the Global Burden of Disease Study 2015
Source: PubMed Central journal article supplement (PMC5388903; doi:10.1016/s0140-6736(16)31012-1), 2016-10-08
Supplement: mmc1.pdf [file mmc1.pdf]

# THE LANCET

## Supplementary appendix

This appendix formed part of the original submission and has been peer reviewed. We post it as supplied by the authors.

Supplement to: GBD 2015 Mortality and Causes of Death Collaborators. Global, regional, and national life expectancy, all-cause mortality, and cause-specific mortality for 249 causes of death, 1980–2015: a systematic analysis for the Global Burden of Disease Study 2015. *Lancet* 2016; **388**: 1459–544.

# Appendix to Global, regional, and national life expectancy, all-cause and cause-specific mortality for 249 causes of death, 1980–2015: a systematic analysis for the Global Burden of Disease Study 2015

This appendix provides methodological detail, supplemental figures and more detailed results for all-cause mortality, causes of death, and years of life lost. The appendix is organized into broad sections following the structure of the main paper.

This study complies with the Guidelines for Accurate and Transparent Health Estimates Reporting (GATHER) recommendations, and this appendix is more comprehensive and encyclopedic than previous Global Burden of Disease appendices. It includes detailed tables, figures, cause modeling write-ups, and information on data in an effort to maximize transparency in our estimation processes and provide a comprehensive description of analytical steps. Components of this document are the same as described in the appendix to our GBD 2013 mortality and causes of death paper; much more of this appendix is new text. We intend this to be a living document, to be updated with each annual iteration of the Global Burden of Disease.

## Contents

|                                                                      |     |
|----------------------------------------------------------------------|-----|
| Part 1. GBD 2015 all-cause mortality and HIV estimation process..... | 4   |
| Part 2. Cause of death database.....                                 | 52  |
| Part 3. Causes of death modeling methods.....                        | 71  |
| Part 4. Central computation.....                                     | 284 |
| Part 5. Data sources and abbreviations.....                          | 288 |
| Part 6. Figures and tables.....                                      | 291 |

## Figures and Tables

|                                                                                                                                                                                                                                                    |     |
|----------------------------------------------------------------------------------------------------------------------------------------------------------------------------------------------------------------------------------------------------|-----|
| Appendix Figure 1: Number of all-cause mortality data sources by country, 1950–2015 .....                                                                                                                                                          | 291 |
| Appendix Figure 2: Sibling history correction for zero-survivorship, by sex .....                                                                                                                                                                  | 292 |
| Appendix Figure 3: Comparison of GBD 2015 adolescent mortality in India to sample registration system, Demographic Health Surveillance System, and United Nations Population Division, for age groups 5-10, 5-15, 10-15, and 15-20, 1990–2015..... | 293 |
| Appendix Table 1: GBD 2015 geographies with HIV/AIDS modeling strategy group .....                                                                                                                                                                 | 297 |
| Appendix Table 2: Number of years with all-cause mortality data points by geography and decade, 1950-2015 .....                                                                                                                                    | 309 |
| Appendix Table 3: Total number of country-years used in HIV/AIDS excess mortality age pattern estimation .....                                                                                                                                     | 313 |
| Appendix Table 4: GBD world population age standard.....                                                                                                                                                                                           | 314 |
| Appendix Table 5: Total number of site years by cause and source type for 2015, excluding studies on lower respiratory infection and diarrhea etiologies .....                                                                                     | 315 |
| Appendix Table 6: Causes of death source list by geography, source type, and study site, with years, age range, and sample size, excluding sources on lower respiratory infection and diarrhea etiologies.....                                     | 318 |
| Appendix Table 7: List of International Classification of Diseases (ICD) codes mapped to the Global Burden of Disease cause list for causes of death.....                                                                                          | 402 |
| Appendix Table 8: Restrictions on age and sex by cause for GBD 2015 .....                                                                                                                                                                          | 407 |
| Appendix Table 9: HIV/AIDS-related garbage code redistribution packages .....                                                                                                                                                                      | 410 |
| Appendix Table 10: CODEm covariates used, level of covariate, and expected direction of covariate by cause, sex, and age .....                                                                                                                     | 411 |
| Appendix Table 11: CODEm predictive validity results by cause, location type, sex, and age .....                                                                                                                                                   | 575 |
| Appendix Table 12: Comparison of GBD 2013 and GBD 2015 covariates and level of covariates used in cause of death modeling.....                                                                                                                     | 585 |
| Appendix Table 13: Modeling strategy for individual cause of death models in GBD 2015 .....                                                                                                                                                        | 632 |
| Appendix Table 14: CoDCorrect cause hierarchy with levels .....                                                                                                                                                                                    | 636 |
| Appendix Table 15: Percent change after CoDCorrect by cause for all ages, both sexes, 2015 .....                                                                                                                                                   | 641 |
| Appendix Table 16: Socio-Demographic Index R-squared values with lags up to 10 years .....                                                                                                                                                         | 649 |
| Appendix Table 17: Socio-Demographic Index coefficients with and without year covariate .....                                                                                                                                                      | 650 |
| Appendix Table 18: Socio-Demographic Index groupings by geography, based on 2015 values.....                                                                                                                                                       | 651 |
| Appendix Table 19: Socio-Demographic Index values for all estimated GBD 2015 locations, 1980–2015 .....                                                                                                                                            | 663 |
| Appendix Table 20: GBD 2015 geography hierarchy with levels .....                                                                                                                                                                                  | 670 |

|                                                                                                 |     |
|-------------------------------------------------------------------------------------------------|-----|
| Appendix Table 21: Causes included in the 2015 Global Burden of Disease Study.....              | 684 |
| Appendix Table 22: Classification of each geography into six data availability categories ..... | 691 |
| Appendix Table 23: Under-5 and adult mortality data sources used in GBD 2015 .....              | 711 |



## Part I. GBD 2015 All-Cause Mortality and HIV Estimation Process

### Background

The goal of the all-cause mortality estimation process for the GBD is to produce the most accurate time series estimates for 1970 to 2015 for all-cause deaths and death rates broken down into the GBD age groups and by sex for all 591 geographies in the GBD 2015. This task is necessarily complicated by the diversity of data sources available for all-cause mortality for different age groups, the known biases in some sources, and the powerful effects of the HIV epidemic in countries with large epidemics on the age pattern of mortality. In this appendix, we divide the analysis of all-cause mortality into five distinct but interconnected areas: child mortality, adult mortality between ages 15 and 60, estimation of a complete set of age-specific death rates, estimation of HIV mortality, and final estimates of age-specific mortality including HIV and fatal discontinuities. While HIV is a cause of death, we present some information on the epidemiological modeling of HIV in this section because of the close inter-dependency between HIV mortality estimation and the all-cause mortality estimation process.

If all countries had complete vital registration systems recording the event of death and periodic censuses, the task of estimating all-cause mortality rates would be much easier. However, in many countries with low or moderate levels of socio-demographic status, information systems on mortality are incomplete and multiple sources must be used to infer the patterns of mortality. The analytical building blocks of the process, as shown in Figure 1 in the main text are repeated through two full iterations. The reason for the iterations is the interdependence between the HIV epidemiological models on estimates of HIV-free all-cause mortality and the use of estimated HIV crude death rates as an input to the 5q0, 45q15, and age-specific mortality models. In the following sections, we provide more detail on each analytical module identifying primary input data and analytical processes.

### Section 1. Child mortality

#### Data sources

##### Vital registration from Causes of Death team

Approximately 62% of deaths data from vital registration (VR) systems used as input for our all-cause mortality modeling were provided by the GBD causes of death (CoD) research team and were aggregated into total age-sex-specific all-cause mortality for each location-year. This aggregation occurred after the data were adjusted and mapped to the GBD cause list.

Data intended for use in causes of death modeling are assessed for quality with respect to consistency of cause fractions, diagnostic accuracy and missing data, whereas for all-cause mortality modeling it is more important that data are fully representative of the given estimation area and are consistent with other all-cause mortality data sources. Thus, there are cases in which VR data prepared for cause-specific modeling cannot be used in all-cause modeling or must be adjusted based on degree of completeness before being used.

In our vetting of CoD VR data, we dropped points where there was a larger than 1% difference from corresponding points in the WHO database. There were instances where VR data used in cause-specific mortality analysis had been collapsed to Basic Tabulation List (BTL) format rather than in full cause classification list format (e.g., ICD-9). In some of these cases, we elected to use WHO data instead.

### Vital registration, sample registration systems, and Disease Surveillance Points from other sources

We endeavored to include all available data from vital registration systems as inputs in our all-cause mortality estimation process. To achieve this, we utilized a number of multi-country vital registration sources, including the WHO Mortality Database, the Human Mortality Database, United Nations Demographic Yearbooks and OECD databases. These multi-country sources are regularly updated in our systems when new data are added. Beyond multi-country sources, for all ongoing national VR systems (for example, the USA National Vital Statistics System), where possible, we cataloged all data sources from each system.

Some countries that do not have a well-performing VR system implement sample registration systems that are incomplete by design. We made use of these data, paying close attention to the proper weighting of sampled data and consistency with other representative sources. We have systematically extracted data from the Sample Registration System Statistical Report series published by the Registrar General of India. For the Disease Surveillance Points system of China, we obtained both national and provincial level DSP data through a data usage agreement with the Chinese Center for Disease Control and Prevention. Census data are systematically extracted from Demographic Yearbook series, Integrated Public Use Microdata Series (IPUMS), and statistical reports from the national statistical bureaus.

### Under-5 populations and live births

For most GBD locations, live births come from the World Population Prospects 2015 (WPP 2015). For subnational locations, we often use interpolated census birth numbers scaled to the national estimates. For locations not estimated in the WPP 2015, we use interpolated census birth counts.

### Complete birth history microdata

Complete birth histories, the preferred method for data collection on child mortality in the absence of vital registration, rely on administering surveys to mothers. The questionnaires ask about all living and deceased children, including date of birth, survival status, and date of death. These modules are included in many routine survey series, including the World Fertility Surveys (WFS), Demographic and Health Surveys (DHS), Multiple Indicator Cluster Surveys (MICS), and many national survey programs. When available, we download and use microdata that has individual-level survey responses as opposed to using tabulated results.

### Complete birth history tabulated data

In some instances, tabulated records from reports become available before survey microdata, and we incorporate these data points into our database of 5q0 data as well. However, as microdata become available, we update with point estimates from our processed microdata rather than the tabulated report estimates.

### Summary birth history microdata

Summary birth history questionnaires are a shorter alternative to complete birth histories. Instead of asking in detail about each child, summary birth histories simply ask mothers how many children they have given birth to and how many of the children have died. The questionnaires are shorter and can be more easily attached to other surveys. Often, Censuses and MICS surveys contain summary birth histories. For GBD, we have compiled all available SBH data with micro-level data that enables us to apply the updated Summary birth history method that leads to more accurate and timely assessment of U5MR.<sup>1</sup>

### Summary birth history tabulated data

In cases where we don't have access to the micro-level data on summary birth history modules from surveys and censuses, we utilize the reported estimates of U5MR from survey or census reports and outlier the first two data points based on mothers in ages 15-19 and 20-24. In cases where tabulated proportions of child died by mother's age group are available, we apply the Maternal Age Cohort method as updated by Rajaratnam and colleagues.<sup>1</sup>

### Under-5 age-sex patterns from VR/SRS/DSP

Vital registration systems are the primary source of data for the under-5 age pattern of mortality in developed countries. Often, these data group under-5 deaths into several age groups- Early Neonatal (0-6 days), Late Neonatal (7-27 days), Post Neonatal (28-364 days), and 1 to 4 years. Some country-years of data have other age groupings with less specificity, with the Early and Late Neonatal age groups combined, or all of the under-1 age groups combined. Sample Registration Systems (SRS) also provide data for the age-sex pattern of under-5 mortality in several countries (notably India and Bangladesh), as well as the Disease Surveillance Points (DSP) system in China.

### Under-5 age-sex patterns from complete birth history

In many countries without vital registration systems, complete birth history surveys can be used to obtain age-sex patterns of mortality in under-5 age groups. These sources are described above in the "Complete birth history microdata" section. For all complete birth history microdata sources, we apply direct estimation methods to obtain probabilities of death for each of the under-5 age groups. Within each survey, if each observation is a child recalled by a mother, observations are grouped into 5-year groups in time to provide a data point of probability of death for each of the under-5 age-sex groups. Recall is cut off 15 years before the survey, limiting data points estimated from the survey to the 15 years prior. All of these estimates are then in the database of estimates for the age-sex pattern of under-5 mortality.

## 1.1 VR prioritization

Our continual evaluation of VR data sources has led us to develop a general hierarchy of preferred VR sources. When considering which of multiple sources to use for a given location-year, we first prefer to use WHO data from GBD cause-specific mortality estimation, then unadjusted WHO data, then Human Mortality Database (HMD) data, then UN Demographic Yearbook data. There were exceptions to this hierarchy where we had reason to believe that there were quality issues with a certain source. For instance, where available we preferred to use HMD VR over WHO data for Germany, Taiwan, and Spain deaths. Single-country VR sources were evaluated based on consistency with other data sources and also VR system documentation.

## 1.2 Identify VR under-enumeration for bias correction

The approach to estimating the completeness of vital registration systems for deaths under age 5 is the same as that of the previous two GBD studies.

In many countries with vital registration (VR) systems to record deaths, complete and/or summary birth histories are also conducted. By comparing the under-5 death rates from these sources to the levels from VR or sample registration systems, we can assess the completeness of under-5 death registration. Completeness can evolve over time as seen with the likely declines in completeness in Central Asia in the 1990s or the increases in completeness in other settings.<sup>2,3</sup> We estimate VR completeness where VR data are available using a model that allows for completeness to vary over time. This assessment is undertaken in two steps: we first assess whether VR is biased, and then we assess time-varying completeness.

In the first step, a country-level regression of  $\log_{10}({}_5q_0)$  on year with a binary indicator variable for  ${}_5q_0$  estimates derived from VR systems is used to determine whether or not a VR system is biased (see equation). If the coefficient for the VR indicator variable is statistically significant at the .05  $\alpha$ -level, we deem the VR system to be biased.

$$\log_{10}({}_5q_0)_t = \alpha + \beta_1 * t + \beta_2 * I_{VR} + \xi_t$$

Where:  $t$  is time (a continuous variable);

$I_{VR}$  is an indicator for  ${}_5q_0$  estimates derived from VR systems; and

$\xi_t$  is in error term.

Second, for all countries with biased VR systems, we estimate the bias, allowing for completeness to evolve over time. We first apply Loess regression to all non-VR  ${}_5q_0$  estimates in a given country; we then calculate the difference between the Loess predicted  $\log_{10}({}_5q_0)$  and the observed  $\log_{10}({}_5q_0)$  estimate from VR in a given year. Since we believe that completeness changes relatively slowly over time, the bias in any given year is defined as the mean difference between the predicted  $\log_{10}({}_5q_0)$  and the observed  $\log_{10}({}_5q_0)$  from VR systems over the adjacent five-year period. This allows for flexibility in the bias correction over time while still maintaining the premise that the completeness of VR systems does not change abruptly. Loess predictions can be unreliable out of sample, so for country-years outside of the range of non-VR data used to generate the predicted  ${}_5q_0$ , we use the mean bias from the nearest five

years of bias estimates from VR points that are within the timespan of the non-VR data. We then correct the VR estimates of  ${}_5q_0$  using the bias correction as shown in the equation:

$${}_5q_0^{corr.} = {}_5q_0^{obs.} * 10^{\widehat{bias}}$$

Where:  ${}_5q_0^{corr.}$  is the corrected estimate of  ${}_5q_0$ ;  
 ${}_5q_0^{obs.}$  is the observed estimate of  ${}_5q_0$ ; and  
 $\widehat{bias}$  is the bias estimate described above.

Once the biased estimates have been adjusted, we also approximate the variance of the bias estimate. This variance is approximated using the median absolute deviation (MAD) comparing the biased VR estimates to the Loess-based estimate of  $\log_{10}({}_5q_0)$ . As with the bias estimation above, the MAD is estimated over a five-year time period. This MAD times 1.4826 is an approximation of standard deviation used to add variance to the biased VR data when included in our final Gaussian Process Regression (GPR) model described in detail later.

In addition to countries where there are both VR estimates and survey estimates of under-5 mortality, there are countries for which only VR data are available, and the VR systems are considered biased. This is a problem particularly in English-speaking Caribbean countries, so for these countries we have adjusted  ${}_5q_0$  estimates from VR using the regional average VR bias in a given year for those countries with both VR and survey  ${}_5q_0$  estimates. The countries for which VR systems have been adjusted using this method include Antigua and Barbuda, Bahamas, Barbados, Bermuda, Dominica, Grenada, Saint Lucia, and Saint Vincent and the Grenadines. While there is no direct evidence on the level of VR bias in these countries, assuming they are complete when similar countries in the region have under-registration seems unwarranted.

### 1.3 Biennial ${}_5q_0$ estimates

#### Complete birth history ${}_5q_0$ computation

Microdata (individual-level survey data) from complete birth histories yield direct calculation of death numbers and probabilities of death in the under-5 age group. Observations are grouped into two-year intervals such that biennial estimates of  ${}_5q_0$  are obtained from these survey data. In GBD 2015, we have unpooled surveys for our analysis, whereas surveys were pooled by series in GBD 2013. Instead of grouping observations from all DHS complete birth history questionnaires from a country into one full set of observations and all MICS observations from multiple survey years into another full set of observations, we analyzed each survey separately (e.g., DHS 2012, DHS 1996, MICS 2002). This allowed for greater ability to address known data quality issues in specific surveys. To compensate for the decreased sample size and to generate greater stability in the unpooled data points, we created 2-year estimates of under-5 mortality, pooling observations over 2-year periods instead of single years.

## Tabular complete birth history processing

In some instances, microdata from surveys were not available. If survey reports could be obtained but the microdata were not available for us to do our own calculations to obtain 5q0, we used report data point estimates. These estimates were added directly to the under-5 mortality database.

## 1.4 Summary birth history time series method

### Summary birth history method from microdata

Rajaratnam and colleagues have developed an updated summary birth history method that is able to provide more accurate and timely estimates of U5MR from micro data on SBH from surveys and censuses.<sup>1</sup>

### Summary birth history analysis from tabular data

When only tabular data is available for the numbers of children ever born and number of children that have died by mother's age, we apply the Maternal Age Cohort model from the method developed by Rajaratnam and colleagues.<sup>1</sup>

## 1.5 5q0 data synthesis, model running, and bias correction

### 1.5.A Data synthesis using ST-GPR and bias correction

We apply the child mortality estimation methodology as reported by Wang et al.<sup>4</sup> Based on the under-five mortality data synthesis model for the Global Burden of Disease Study 2010 and 2013, we have incorporated data bias adjustment into the modeling process. Specifically, we have included a fixed effect for source type across all locations to detect systematic differences in the level of child mortality, controlling for covariates for one source type versus another. The groups of sources to make this adjustment are listed in the table below. In addition, we include a random effect for each country-source. By choosing a reference source country-by-country or using the mean of a set of sources, we can adjust on a country-by-country basis for the problem of compositional bias created by substantial source-specific non-sampling error. Once the systematic difference in sources is removed, we are able to avoid estimating false trends due to partial overlap of sources with different levels of non-sampling variance. We then apply the combination of non-linear mixed effects model, spatial-temporal regression and Gaussian process regression to synthesize raw child mortality data after data bias adjustment to obtain consistent time series estimates of mortality with 95% uncertainty intervals for every country.

**Table: Source types used in child mortality bias correction**

| Data Source Type                                                                        |
|-----------------------------------------------------------------------------------------|
| Complete Birth History-Demographic and Health Survey                                    |
| Complete Birth History-AIDS Indicator Survey and Malaria Indicators Survey              |
| Complete Birth History-World Fertility Survey                                           |
| Complete Birth History-Multiple Indicator Cluster Survey                                |
| Complete Birth History-Census                                                           |
| Complete Birth History-Other survey Series                                              |
| Summary Birth History-Demographic and Health Survey                                     |
| Summary Birth History-Multiple Indicator Cluster Survey                                 |
| Summary Birth History-Other survey series                                               |
| Summary Birth History-AIDS Indicator Survey and Malaria Indicators Survey               |
| Summary Birth History-Census                                                            |
| Summary Birth History-World Fertility Survey                                            |
| Vital Registration/Sample Registration/Surveillance- complete                           |
| Vital Registration/Sample Registration/Surveillance- incomplete                         |
| Household Death Recall-Other survey series                                              |
| Household Death Recall-Census                                                           |
| Household Death Recall – incomplete Vital Registration/Sample Registration/Surveillance |

### 1.5.B Mixed effect non-linear model and the bias adjustment for raw U5MR sources

In this stage, we used a nonlinear mixed effects regression to estimate data bias and provide first stage predictions.

The nonlinear mixed effects regression model is

$${}_5m_{0cys} = \exp[(\beta_1 + \gamma_{1c}) * \log(LDI_{cy}) + (\beta_2 + \gamma_{2c}) * education_{cy} + \gamma_c + \gamma_{cs} + \alpha_t] + \beta_3 * HIV_{cy} + \varepsilon_{cys}$$

where  $c$  is country,  $y$  is year,  $s$  is source, and  $t$  is source type; each source was categorized into one of 17 source types across all countries, as listed in the table above.

Additionally,

${}_5m_0$  is under five mortality rate

$LDI$  is lagged distributed income per capita

$education$  is mean years of education for women of reproductive age (15-49 years)

$HIV$  is death rate due to HIV in age groups 0-4

$\gamma$  is a random effect

$\alpha$  is a fixed effect on source type across countries

$\beta_i$  is a fixed covariate coefficient

$\varepsilon$  is the residual

For each country, we rely on expert opinion to choose a source, or combination of sources, which are believed to be the least biased. If a country has vital registration which we deem to be complete (described in detail in an earlier section), this is the reference source. If a country does not have complete vital registration, but has DHS estimates from complete birth histories, these were chosen as the reference source. If a country has neither of these types of data or DHS surveys are deemed unreliable, we assigned the surveys conducted after 1980, in combination, as the reference (incomplete vital registration data is not included). Additionally, in many countries we chose other surveys as the reference. For accurate estimation, it is important to have local knowledge on specific data sources' accuracy. All-cause mortality experts draw from their familiarity with data quality to help us to choose the reference category.

Each data source has an associated random effect as well as a source type fixed effect. The values of these random and fixed effects for the reference sources are deemed to be the true deviation from unbiased mortality level. In countries with multiple high-quality sources, the mean of the random and fixed effects from these sources is taken as this true deviation. We adjusted all other sources by including these reference values for the random and fixed effects values instead of those estimated for each individual source, as shown below.

$$adjusted_5m_{0,cys} = \exp[(\beta_1 + \gamma_{1c}) * \log(LDI_{cy}) + (\beta_2 + \gamma_{2c}) * education_{cy} + \gamma_c + \gamma_{ref,c} + \alpha_{ref,c}] + (\beta_3 + \gamma_{3c}) * HIV_{cy} + \varepsilon_{cys}$$

The exception to this correction is incomplete vital registration data, which was adjusted upwards using a five year rolling mean of the difference between incomplete vital regression and a Loess of the already-adjusted survey data, described above in section 1.2.

### 1.5.C Spatio-temporal smoothing

The spatio-temporal stage smooths the residuals between the predicted time series of  ${}_5q_0$  and the adjusted raw data over time and across countries in the same GBD region. The predicted time series for this smoother was obtained from the equation below; no random effects or survey type fixed effects are included.

$$predicted_5m_{0,cy} = \exp[\beta_1 * \log(LDI_{cy}) + \beta_2 * education_{cy} + \alpha_{intercept}] + \beta_3 * HIV_{cy}$$

We first found the residuals between the predicted time series, above, and the adjusted points. We then applied a combination of smoothing functions to these residuals. For each country year, we weighted all the data points in this region based on their proximity to this country-year in space and time. We gave 99% of the weight to in-country residuals, and 1% of the weight to out-of-country residuals. Additionally,



we used a modified tricubic window, as specified below, to give more weight to points closer in time, and less weight to points further in time.

$$w_t = \left( 1 - \left( \frac{|r_t - r_{est}|}{1 + \operatorname{argmax}_t |r_t - r_{est}|} \right)^\lambda \right)^3$$

The  $r_t$  and  $r_{est}$  terms are, respectively, the year of interest and the year of the residual being weighted. The  $\operatorname{argmax}_t |r_t - r_{est}|$  term is the maximum distance between the year of interest and a residual within the region. The  $\lambda$  parameter in this weighting function dictates how quickly the weights fall off as the distance in time increases: a larger  $\lambda$  implies that the assigned weights will diminish slowly with time, while a smaller  $\lambda$  allows the weights to diminish more rapidly with time.

For most countries, we chose  $\lambda = 0.8$ . We then created one estimate of the smoothed residuals using a linear fit to this weighted data; this is similar to a Loess fit. Additionally, we created a second estimate of the smoothed residuals by calculating the weighted average of this data.

We then combined these two estimates for a final estimate of the smoothed residuals. In data-dense countries, more weight was given to the local linear fit; in data sparse countries, more weight was given to the weighted average. The equation for this is as follows.

$$\text{final smoothed residual} = k * \text{linear estimate} + (1 - k) * \text{weighted average}$$

$$\text{where } k = \frac{\text{number of in country data points}}{\text{number of in country data points} + \text{number of country years with no data}}$$

Finally, the smoothed residuals were added back to the predictions from above; this smoothed approximation to the adjusted data was used as the prior for the Gaussian process regression, described below.

### *Third stage: Gaussian process regression (GPR)*

The output of the space-time local smoother was used as a prior for the Gaussian process regression, which produced a final time series of point estimates, as well as confidence bounds. Parameters for the GPR were chosen through cross-validation described in section 1.5.E.

The model for the Gaussian process regression is shown below, where  $\mu_t$  is the true  $\log_{10}(sq_0)$  at time  $t$ ,  $f(t)$  is the baseline mortality risk, and  $S_t$  captures excess mortality due to war and disasters.  $S_t$  is estimated independently of  $f(t)$ .  $M$  and  $C$  describe the Gaussian process, giving the mean and covariance, respectively.

$$\mu_t = f(t) + S_t$$

$$f(t) \sim \text{GP}(M, C)$$

We specified a prior distribution for  $f(t)$  from the spatio-temporal regression, and a likelihood function which describes the data generation process; the specified prior distributions and likelihood function are described below. We then used Markov Chain Monte Carlo (MCMC)<sup>5</sup> to approximate the posterior

distribution of  $f(t)$  which also incorporates information from the observed empirical estimates of adult mortality. An MCMC chain of length 5000 was produced; the first 3000 samples were discarded and the remaining 2000 were thinned by a factor of 2 for a total of 1000 simulations retained. The reported best estimates and confidence intervals were generated from the mean and the 2.5<sup>th</sup> and 97.5<sup>th</sup> percentiles of the 1000 samples, respectively.

The prior distribution of  $f(t)$  can be described in terms of the mean prior—the prior for  $M$ —and the covariance prior—the prior for  $C$ . We utilized the second stage predictions as the mean prior and used a Matern covariance function to describe the covariance prior. The parameters of the Matern covariance function were selected through cross-validation and are region-specific.

For cross-validation, data were divided as follows: for each region, a number  $X$  between 10 and 20 was sampled and the most recent  $X$  years of data in that region were assigned to the testing set. Then a number  $X$  between 5 and 10 was sampled, a country from within the region was sampled, and a year where there is data in that country was sampled. All data within  $X$  years of the selected year in the selected country were assigned to the testing set. This was repeated as many times as there are countries in the region; because iterations of this procedure were independent, the data selected for the testing set may overlap. Any data that were not selected for the testing set were included in the training set.

For each testing and training division, the second stage model is fit on the training data. Then, the third stage model is also fit on the training data using each combination of scale and squared amplitude values tested for a total of 25 sets of predictions. The testing data are matched to the predictions in the corresponding country and year for each of the 25 sets of predictions. For each match we calculated the absolute relative error of the prediction compared to the empirical estimate in the testing set. We also classified each empirical estimate in the testing set as being covered or not covered by each corresponding prediction. The determination of coverage was made by calculating total variance—the sum of the variance of the empirical estimate (described below) and the variance of the GPR estimate—and then calculating a 95% confidence interval around the prediction based on this total variance and assuming a normal distribution. If the empirical estimate was within this confidence interval, it was classified as covered, and otherwise not.

Once this procedure has been carried out for all 100 testing and training divisions of the data we calculated the mean absolute relative error and the mean coverage for each combination of GPR parameters across all 100 sets of predictions. The ideal set of parameters would produce estimates with low mean absolute relative error and mean coverage close to 0.95. We used the function described in the equation below to calculate a loss metric which incorporates both the coverage and the absolute relative error into a single measure to assess performance. Parameter combinations with lower values of this loss metric are considered preferable.

$$\text{Loss} = \begin{cases} \text{if coverage} \leq 0.95: (0.95 - \text{coverage})/5 + (\text{absolute relative error}) \\ \text{if coverage} > 0.95: (\text{coverage} - 0.95)/1 + (\text{absolute relative error}) \end{cases}$$

The optimal parameters may differ from country to country. To allow for this, we calculated the loss function described in the equation above separately for each of the 22 GBD geographic regions.

#### 1.5.D Likelihood

The likelihood describes the probability of observing the data given a particular set of parameters. As shown in the equation below, we used a normal model for describing the probability of observing a particular value of  $\log_{10}({}_5q_0)$  where the mean is given by  $f(t)$  and the variance by  $V_t$ , the data variance.

$$\log_{10}({}_5q_{0t}) \sim \text{Normal}(f(t), V_t)$$

Data variance was calculated for each empirical observation of  ${}_5q_0$  and incorporated both sampling and non-sampling variation. The method for calculating the data variance depended on the type of data:

1. For estimates derived from complete vital registration data we assumed that there was no non-sampling variance and included only sampling variance as computed from a binomial model. We set  $N$  equal to the national population aged 0 to 5 years and  $p$  equal to the mortality rate,  ${}_5m_0$ . We calculated the variance of  ${}_5m_0$  from  $p(1-p)/N$  and then transformed this to the variance of  $\log_{10}({}_5q_0)$  using the delta method.<sup>6</sup>
2. For estimates derived from incomplete vital registration data, we wanted to include not only sampling variance but also the non-sampling variance that arises from uncertainty in the completeness estimate. For these data, the total data variance was given by the sum of the sampling variance (calculated as for complete vital registration data) and the variance of the completeness estimate;
3. For estimates derived from complete birth histories we generate 1000 simulations of  ${}_5q_0$ , convert these estimates into  $\log_{10}$  space and calculate the sampling variance from these 1,000 simulations;
4. For estimates derived from summary birth histories we use the standard error from the mean residuals;
5. For estimates not covered under the above 4 calculations the missing data variance is determined as the maximum standard error from non-VR points in the country, if the data variance is still missing it is calculated as the maximum standard error from non-VR data in the GBD region.
6. Finally, for each source type, we calculate the within-source-type variance of the source-specific random effect. This additional non-sampling variance is then converted to  $\log_{10}$  space and added to the variance as calculated above for all data points not classified as complete vital registration.

#### 1.5.E Hyper-parameter selection for under-5 mortality rate ST-GPR

In GBD 2015, we expanded the scope of our parameter selection to include variables used in space-time smoothing in addition to scale and amplitude used in the Gaussian process regression. We have applied rigorous out-of-sample predictive validity testing to select space-time and GPR parameters, and the process is carried out in the following steps:

1. For space-time smoothing, we tested  $\zeta$ , space weight, values of 0.7, 0.8, 0.9, and 0.99 and  $\lambda$ , time weight, values of 0.1 to 0.9 in increments of 0.1. We test five values of the scale—10, 15, 20, 25, 30 --- and five values of the squared amplitude—1, 1.5, 2, 2.5, and 3 times the mean squared error of the residuals from the second-stage prediction model. Because we tested combinations of both space-time and GPR parameters, this led to a total of 900 combinations tested in each process.

2. We divided the data into testing and training sets 100 times. Data were divided as follows: for each region, a number X between 10 and 20 was sampled and the most recent X years of data in that region were assigned to the testing set. Then a number N between 5 and 10 was sampled, a country from within the region was sampled, and a year where there is data in that country was sampled. All data within N years of the selected year in the selected country were assigned to the testing set. This was repeated as many times as there are countries in the region; because iterations of this procedure were independent, the data selected for the testing set may overlap. Any data that were not selected for the testing set were included in the training set.

3. The space-time smoothing and Gaussian process regression are fit on the training set using each set of parameters and estimates for every location are generated for the entire time period;

4. Within a given iteration we calculate the absolute relative error of the final GPR estimates compared to each empirical estimate in the testing set. We also classify each empirical estimate in the testing set as covered or not covered and calculate the percent of the data covered by the 95% uncertainty interval of the GPR estimates while considering the uncertainty of the data themselves. The determination of coverage is made by calculating total variance—the sum of the data variance and the variance of the GPR estimate—and then calculating a 95% uncertainty interval around the GPR estimate based on this total variance and assuming a normal distribution. If the empirical estimate is within this uncertainty interval, it is classified as covered, and otherwise not. For each combination of parameters, we calculate the mean absolute relative error and the mean coverage across all iterations from all countries within a particular group. The loss function described below is then calculated for each parameter combination, and the parameter combination with the lowest loss is selected for each group;

$$\begin{aligned} \text{if coverage} \leq .95, \text{ loss} &= \text{absolute relative error} + ((1-\text{coverage})-0.05) / 5 \\ \text{if coverage} > 0.95, \text{ loss} &= \text{absolute relative error} + (0.05 - (1-\text{coverage}))/1 \end{aligned}$$

5. For U5MR, parameter selection occurs at the location level, i.e. different parameters for each location. While there are data sparse locations, all locations have some data on U5MR for the time period we provide estimates for.

In some cases, we restricted the universe of possible parameters. Most of these restrictions occurred for the  $\lambda$  parameter. For many locations with complete VR, we knew that higher lambda values would result in a larger confidence interval than would be appropriate. We also included a lower limit of  $\lambda$  for some locations with either incomplete VR or no VR, so that confidence intervals would reflect the uncertainty of these data. For example, in Western Europe, High-Income North America, High-Income-Asia-Pacific, and Australasia, we set the condition that  $\lambda$  must be less than 0.5 and the condition that  $\zeta$  be .99. We also made some other manual exceptions to  $\lambda$ ,  $\zeta$ , and scale where results did not pass the common sense test.

We set the differentiability to 0.8 in countries with only complete VR data, excepting those in the Caribbean, Oceania, and the country of Mauritius, and to 2.0 in other all other locations. We used a

lower differentiability in countries with complete VR data because in these countries we want the final estimates to follow the data closely even if the trend described is not smooth. In contrast, in countries where the data are less reliable we don't want the final estimates to be overly influenced by individual data points.

### 1.6 Identify and remove outliers

There are several important quality-control steps in reviewing child mortality data and estimates. First, data points from years in which fatal discontinuities occurred are outliered, unless they are VR data points with sufficient information that the fatal discontinuities can simply be subtracted out of the VR data. The intent is to capture the underlying mortality risk rather than large stochastic variations. These fatal discontinuities are then added on in a later step (see section 5). Secondly, we outlier data sources with quality concerns such as the Afghanistan DHS from 2010. Our extensive collaborator network allows for review of sources, and collaborators can raise concerns over known issues with data sources about which they have expert knowledge.

### 1.7 Rake subnational estimates to national level (excluding South Africa)

The estimation process for 5q0 does not enforce consistency between subnational estimates and national estimates. To ensure consistency throughout the GBD hierarchy, we rescaled the subnational estimates to the national level by population-weighting to get an implied national estimate from the subnational estimates, creating a scalar of the national-level estimate from GPR to the aggregated subnational estimates, and then multiplying all of the subnational estimates by this scalar to obtain the scaled estimates. In most cases, we considered national-level estimates to be more reliable, so we chose this strategy of subnational scaling. In locations with high-quality vital registration data, this scaling has a minimal effect, but the effect can be greater in locations with more subnational units and variable-quality data. In South Africa, it was essential that the state-specific mortality patterns be consistent with HIV models is essential, since such a large part of the trend is driven by deaths due to HIV/AIDS. In this case, instead of scaling provincial-level estimates to national-level GPR estimates, we aggregated province-level GPR estimates to generate the national-level estimates.

### 1.8 Review estimates for quality

Estimates of U5MR from the ST-GPR process are reviewed with comparison to UNICEF estimates from their 2015 revision and GBD 2013 results. Any change and difference will be traced to either changes in available data or changes induced by the improved parameter selection process. Revision is made after the review process and through expert consultation with country experts and GBD mortality collaborator network.

### 1.9 Under-5 mortality rates with HIV

The U5MR ST-GPR process generates U5MR for all GBD 2015 locations that is inclusive of the impact of all causes of death excluding fatal discontinuities, which are added in a separate step (see section 5).

## 1.10 HIV-free 5q0

As a result of the Non-linear mixed effects model, we are able to generate HIV free 5q0 counterfactuals where the crude death rate due to HIV in age group 0-4 is set to zero. This is a crucial input to the GBD model life table system as described in section 3.

## 1.11 Under-5 age pattern model estimation

The process used to break down under-5 mortality into age- and sex- specific groups has been previously described.<sup>7</sup> The current process is largely similar but has been modified to improve the accuracy of predictions for countries affected by HIV/AIDS. As pointed out by Bradshaw et al., neonatal mortality tends to be overestimated if the all-cause child mortality rate is used as the only predictor.<sup>8</sup> We use a two-stage modeling process to generate sex-specific estimates of early neonatal (days 0 to 6), late neonatal (days 7 to 27), post-neonatal (the remainder of the first year), and childhood (ages 1 to 4) mortality. First, the ratio of male to female under-5 probability of death is estimated, then age- and sex-specific mortality estimates are generated using this ratio. To fit models to obtain estimates, data from vital registration, sample vital registration, and complete birth histories are converted to mortality risks for specific age groups. Sources have differing levels of age specificity and at least include infant (composed of early neonatal, late neonatal, and post-neonatal) and child mortality, but can include all 4 smaller age groups. The two models – first the sex model, then the age-specific and sex specific model – are fit on the data.

The sex model predicts the ratio of male probability of death under age 5 ( ${}_5q_0$ ) to female  ${}_5q_0$  for each country  $i$  in region  $j$  in year  $t$ . The data are ordered by observed  ${}_5q_0$ , and categorized into 20 evenly sized bins. Then, the model is fit to the data as described in the equation below.

$$\left( \frac{\text{Male } {}_5q_0}{\text{Female } {}_5q_0} \right)_{jit} = \beta + \gamma_{{}_5q_0 \text{ bin}} + \gamma_j + \gamma_i + \varepsilon_{jit}$$

The ratio is predicted by nested location and region random effects  $\gamma_i$  and  $\gamma_j$ , a random effect on the  ${}_5q_0$  bin, and an intercept term,  $\beta$ . A Loess regression is then used to smooth the estimated  $\gamma_{{}_5q_0 \text{ bin}}$  on  ${}_5q_0$ , creating a continuous  $\gamma'_{{}_5q_0 \text{ bin}}$ . Then, the equation below is used to predict the ratio of male to female  ${}_5q_0$ :

$$\left( \frac{\text{Male } {}_5q_0}{\text{Female } {}_5q_0} \right)_{jit} = \hat{\beta} + \gamma'_{{}_5q_0 \text{ bin}} ({}_5q_{0jit}) + \hat{\gamma}_j + \hat{\gamma}_i$$

The male and female  ${}_5q_0$  values are found using the system of equations that includes the model above and equation below, where  $r_{\text{birth}}$  is the sex-ratio at birth.

$${}_5q_0 = \left( \frac{1}{1+r_{\text{birth}}} \right) * (\text{female } {}_5q_0) + \left( \frac{r_{\text{birth}}}{1+r_{\text{birth}}} \right) * (\text{male } {}_5q_0)$$

Age-specific models are then fit for each age group on sex-specific data. A separate model is fit for each age group yielding five models for each sex: early neonatal, late neonatal, postneonatal, infant, and child. The log of the probability that an under-5 death occurs in a given age group is modeled instead of the mortality risk, simplifying the scaling process and restricting risks to be between 0 and 1. Because evidence suggests HIV has differential effects on different under-5 age groups,<sup>8,9</sup> the crude death rates from HIV/AIDS in the under-5 age group were included in the model. We used crude death rate due to

HIV from the GBD 2015 model (see section 3). The inclusion of this covariate improves both the fit and prediction of the model in countries with HIV. In addition, in this version of GBD, we added two new covariates to improve model fit. First, we included the maternal education covariate that is also used in the 5q0 first-stage model. Second, we used the completeness of the source-specific 5q0 estimate for the data-point used in the regression. This completeness was calculated by taking the source-specific 5q0 point estimate and dividing by the final 5q0 estimate from GPR. The functional form of the model is below.

$$\log(\text{Pr}(\text{death at age } y | \text{u5 death})_{jit}) = \beta_1 + \beta_2 * HIV_{it} + \beta_3 * Mat.Ed._{it} + \beta_4 * Completeness_{sit} + \gamma_{5q0 \text{ bin}} + \gamma_j + \gamma_i + \epsilon_{jit}$$

Similar to the sex model, the sex-specific age prediction uses  $_{5q0}$  bins and smooths the random effect on the bin using  $_{5q0}$ . The prediction equation for age  $y$  in country in region  $j$  at time  $t$  is seen below, with nested random effects on country ( $\hat{\gamma}_i$ ) and region ( $\hat{\gamma}_j$ ), an intercept term ( $\hat{\beta}_1$ ), a smoothed random effect on  $_{5q0}$  bin ( $\hat{\gamma}'_{5q0 \text{ bin}}(5q0_{jit})$ ), a coefficient on the under-5 crude death rate from HIV ( $\hat{\beta}_2$ ), a coefficient on maternal education ( $\hat{\beta}_3$ ), and a coefficient on completeness ( $\hat{\beta}_4$ ):

$$\log(\text{Pr}(\text{death at age } y | \text{u5 death})_{jit}) = \hat{\beta}_1 + \hat{\beta}_2 * HIV_{it} + \hat{\beta}_3 * Mat.Ed._{it} + \hat{\beta}_4 * 1 + \hat{\gamma}'_{5q0 \text{ bin}}(5q0_{jit}) + \hat{\gamma}_j + \hat{\gamma}_i \quad 13$$

Note that for prediction, the completeness coefficient gets multiplied by 1 instead of a source-specific completeness, as we seek to predict based on a hypothetically complete source.

Once each of these predictions is made by age group, they are rescaled such that the probabilities of death in the Early Neonatal, Late Neonatal, Post Neonatal, and 1-4 year age groups aggregate to the 5q0 estimates from the under-5 model.

### 1.12 Identify and remove outliers

There are several criteria for removing outliers for the under-5 age-sex pattern model. First, sources may be marked as outliers if they contain low population numbers or very few deaths. If data come from vital registration and the under-5 population of the country is less than 20,000 person-years, then the data are outliered. If the total number of deaths in a VR system among both sexes under-5 is less than 200, the data are also outliered. VR data that are considered incomplete are marked as outliers. To be considered incomplete, the 9-year rolling average of the VR data 5q0 value is compared to the 9-year rolling average of the 5q0 estimates. Then, for a given data-year, the value of 5q0 in the raw data is compared to our final 5q0 estimate. A value of 90% would be considered incomplete and outliered, unless the ratio of the 9-year rolling average above is above 90% complete. Any data that are chosen as outliers as part of the 5q0 analysis are also marked as outliers in the age-sex pattern analysis. If the female-to-male ratio of 5q0 in the raw data is less than .5 or greater than 2, the data are outliered because of an implausible sex ratio. If a country has both VR and CBH data, they are typically both used, unless the two conflict, in which case the VR data are used. CBH data points more than 15 years before the survey are outliered. Lastly, some data points are manually outliered. For example, the definition of live birth changed in some Eastern European countries in the 1990s, leading to inconsistencies. For these examples, age group data in ages that would include childbirth deaths (early neonatal, neonatal, and ages 1-4) are outliered if the definition of live birth contains a minimum weight, as it did in some of these locations.

### 1.13 Under-5 age-sex splitting model application

The prediction method from the age-specific model is described above in 1.11. First, the results of the sex model are applied, yielding sex-specific 5q0 estimates. Once age-sex-specific predictions of the log conditional probability of death are made, these are exponentiated and rescaled so that they sum to 1. First, the under-1 and 1-4 conditional probabilities are scaled to add to 1. Then, the early neonatal, late neonatal, and post neonatal conditional probabilities are scaled to the under-1 conditional probability. Then, the probabilities of death can be calculated so that they properly aggregate to the final 5q0 prediction. For example, to calculate the probability of death in the early neonatal age group, the rescaled conditional probability of early neonatal death given under-5 death is multiplied by the probability of under-5 death. Then, to obtain the probability of death in the late neonatal age group, the rescaled conditional probability of death in the late neonatal age group given under-5 death is multiplied by the probability of under-5 death and then divided by the probability of survival to the beginning of the age group, and so on. Equations below represent this process, where  $q_{enn}$  represents early neonatal and  $q_{lnn}$  represents late neonatal.

$$q_{enn} = \Pr(\text{death in } enn \mid u5 \text{ death}) * 5q0$$

$$q_{lnn} = \Pr(\text{death in } lnn \mid u5 \text{ death}) * 5q0 / (1 - q_{enn})$$

The rest of the older age groups are also calculated in this manner, yielding probabilities of death in each of the under-5 age-sex groups.

### 1.14 Update under-5 populations using fatal discontinuities

To obtain denominators for vital registration death numbers and to estimate death numbers for age groups under-5, we need to obtain age-specific populations for the under-5 age groups. Taking final probability of death estimates including impacts of fatal discontinuities from the first run of the all-cause mortality process as the mortality risks, we take our input birth numbers and create person-year estimates of population as described in section 1.15. These person-year estimates are then the input as populations for the final run of the estimation process.

### 1.15 Under-5 death number estimation

#### Assigning under-5 deaths to GBD age-sex groups

To estimate the number of under-5 deaths, we run an estimation process that ages birth cohorts through our estimated probabilities of death. This process separates our yearly birth numbers for each location into week-sized cohorts and ages each of these cohorts through our mortality estimates in week-long steps to estimate the number of person-years and deaths in each of the early neonatal, late neonatal, post neonatal, and 1-4 years age groups.



## Section 2. Adult mortality

### Data sources

#### Adult population estimates

To calculate adult mortality rate using household death recall, age specific populations in age group 15 to 59 from the corresponding survey or census sources are used. This is also true in calculating adult mortality rate using reported deaths from Sample Registration System from India and Disease Surveillance Point system from China. For data from vital registration systems, we currently have two major sources for population in the corresponding age groups:

1. Population estimates from the World Population Prospect 2015 Revision by the United Nations Population Division. This provides majority of the population estimates used in GBD2015.
2. For the 37 countries covered by the Human Mortality Database, we use population exposure from this source instead of WPP2015.

For subnational locations, interpolation and extrapolation based on rate of change are used together with age specific population from censuses. Raking is applied to ensure consistency between subnational and national populations.

#### VR/SRS/DSP

See section 1 descriptions of vital registration sources for information on how VR, SRS, and DSP data is identified and prioritized.

#### Household recall of deaths

Household recall is ascertained from large survey series such as the Malawi 2010 DHS. A survey series must include a module asking about the number of deaths of household members within a given recall time period, along with a list of household members who have not died over this period of time. In addition, these survey series must be considered nationally representative, include survey weights (if applicable), and include the sex and age (either current or at death) of all household members.

#### Sibling survival histories

Data for sibling survival histories is primarily taken from large survey series in which respondents are asked about the status of their siblings, alive and dead. Some examples of sibling survival history sources include the Laos 2011-12 Multiple Indicator Cluster Survey and many DHS sources. To generate estimates of sibling survival, each questionnaire must contain a module with a full accounting of all siblings (children born to the same mother) of all respondents, along with data on the year of death (if applicable), sex, and age at death or year of birth. Additionally, the surveys must not have significant missingness in terms of responses to the sibling survival history module, as was the case in certain surveys such as the Mexico Health and Aging Study 2012.

## 2.1 Completeness Assessment: Death Distribution Methods and completeness estimates synthesis

Vital registration systems may not capture all adult deaths. It is important to assess the quality, or in other words, the completeness, of available VR data. Demographers have long been applying a suite of death distribution methods (DDMs) including generalized growth balance (GGB), synthetic extinct generation (SEG), and a combined approach (GGBSEG) to assess completeness.<sup>10-14</sup> These methods compare the age distribution of the population recorded in two censuses with the age distribution of deaths recorded between these two censuses and attempt to estimate completeness of VR.

Recent modifications of these DDM methods provide estimates of completeness that, based on careful simulation studies, are more accurate and robust than traditional methods; nevertheless, these methods generate completeness estimates with substantial uncertainty intervals.<sup>15</sup>

For the GBD study, the process for estimating completeness of death registration for adults is based on estimates of adult completeness from three death distribution methods updated by Murray and colleagues in 2010 as well as information about child completeness.<sup>15</sup> These two sources of information are combined to generate a series of estimates of source- and country-specific adult death registration completeness from 1970 to 2015. The underlying assumption of this process is that completeness of systems will change gradually, and consequently, assessments of completeness for a given year should be informed by DDM estimates for prior and future years in that country. Further, completeness is likely to be similar among countries within a region, and we can inform estimates of completeness with levels of completeness estimated for countries in the same region or super-region by borrowing strength over space as well as time. To do this, we use a two-stage model, whereby we first predict adult completeness based on child completeness and then use a spatial-temporal regression model to incorporate information about adult completeness from the application of DDM methods.

Child completeness is calculated as the ratio of observed child mortality to estimated child mortality for a given source, country, and year. For a particular country-source, estimates of child completeness are only available for years where that data source is present, but a complete time series of child completeness estimates is produced based on a smoothing process. For country sources with no more than three years of data, a constant level of child completeness at the level of the mean of those years that are available is assumed. For country sources with more than three years of data, Loess regression is used to fill in the time series. In order to be conservative in our out-of-sample estimates of child completeness, instead of using the Loess predictions to forecast and backcast we simply hold child completeness constant before the first observation and after the last observation. Additionally, when there is a gap of more than five years we linearly interpolate between the observations on either side of this gap instead of using the Loess predictions to fill in these years.

## 2.2 Sibling survival method

In countries where sources including vital registration and household death recall are scarce, sibling histories provide important information on the levels and trends of adult mortality rates. The sibling survival technique employed by the GBD study is largely based on the work by Obermeyer et al. (2010)<sup>16</sup> with a few improvements to their methods: (1) use of appropriate survival weights that account for the study design; (2) implementation of a correction to account for the mortality experience of families not represented because none of the siblings were alive and eligible to respond to the survey; and (3)

refinements for adjusting for recall bias. We validated these methodological developments in a range of simulation environments, and we have also developed ways of adjusting for recall bias and handling sparse data in survey designs where the age range of the respondents is narrower than the age range desired for estimation.<sup>16</sup>

Selection bias refers to the underrepresentation of high mortality sibships in the sample population—sibships with higher rates of mortality are less likely to be represented in the survey because fewer of them are likely to have survived to be selected into the sample. A method to correct for this underrepresentation, proposed by Gakidou and King<sup>17</sup>, incorporates a sibship-level weight,  $W_j = B_j / S_j$ , where  $B_j$  is the original sibship size and  $S_j$  is the number of siblings in sibship  $j$  who survive to the time of the survey. When each observation in the dataset being analyzed is at the sibship level, this Gakidou-King (GK) weight can be used to compute a weighted average of the proportions of siblings deceased as reported by each respondent. In the absence of any sibships where all siblings have died, this correction algebraically corrects for the underrepresentation of high-mortality sibships in the survey sample.

When the dataset is expanded to the sibling level (i.e., one observation for each sibling as opposed to sibship), the number of observations listed in the dataset for each sibship corresponds to the original sibship size,  $B_j$ , and so the numerator of  $W_j$  is already accounted for. The resulting sibling-level weight is therefore  $W_i = 1/S_j$  for sibling  $i$  in sibship  $j$ .<sup>18,19</sup>

Since the analysis reported here is carried out at the sibling level, we use  $W_i$  rather than  $W_j$ . This improves on previous applications of the method where the sibship-level weight was inappropriately applied to data that had been expanded to the sibling level.

Further, the number of surviving siblings in the family must also be tailored to the eligibility criteria for respondents of the given survey.<sup>18</sup> In applying Gakidou and King’s elucidation of the survivorship correction,  $S_j/B_j$  represents the probability that a sibling in sibship  $j$  survives and is eligible to be selected in the survey. For Demographic and Health Surveys (DHS), respondents must be women between the ages of 15 and 49 and so the  $S_j$  in this case would be the number of surviving women in a sibship  $j$  who are between the ages of 15 and 49 at the time of the survey. In this analysis, the value of  $S_j$  has been chosen to be consistent with the eligibility criteria of each survey.

The sampled population excludes sibships in which there are not any eligible siblings to respond to the surveys; thus, we cannot report on the mortality experiences of these siblings. The zero-survivor correction estimates the number of sibling deaths that are missing from the sample by age and sibship size, and then adds these siblings to the observed sample before calculating age-specific mortality rates. This correction is applied to sibships with one or two females. The correction uses the relationship between the true number of sibships with one (or two) females and the cumulative probability of dying before the time of the survey to estimate the number of missing sibling deaths. For one-sibling sibships,

$$\begin{aligned} K_{obs}^1 &= K_{true}^1 * (1 - aq_0^1) \\ K_{miss}^1 &= K_{true}^1 * aq_0^1 \end{aligned}$$

Where:  $K_{obs}^1$  is the number of sibships with one sister that are observed in the sampled population;  
 $K_{true}^1$  is the true number of sibships with one sister in the population;  
 $K_{miss}^1$  is the number of sibships with one sister that are not represented in the sampled population due to zero-survivor bias;  
 ${}_a q_0^1$  is the cumulative probability of death for five-year age-group  $a$ ; and  
 $(1 - {}_a q_0^1)$  is the probability that the sister has survived to the time of the survey.

From these two equations, it follows that the number of sibships with only one sister that are not represented in the population due to zero-survivor bias is equal to:

$$K_{miss}^1 = \frac{K_{obs}^1}{1 - {}_a q_0^1} * {}_a q_0^1$$

We multiply this estimate of the number of missing sibships by the number of females in the sibship (which in this case is one) to get an estimate of the number of females in each age group that are missing from the sample because they have died. We then expand this number so that we have one observation per missing sibling, assign birth and death dates to these missing siblings based on the distribution in the observed siblings, and append them to our existing dataset. This process is also carried out for families with two sisters:

$$\begin{aligned} K_{obs}^2 &= K_{true}^2 * (1 - {}_a q_0^1 * {}_a q_0^2) \\ K_{miss}^2 &= K_{true}^2 * {}_a q_0^1 * {}_a q_0^2 \\ \therefore K_{miss}^2 &= \frac{K_{obs}^2}{1 - {}_a q_0^1 * {}_a q_0^2} * {}_a q_0^1 * {}_a q_0^2 \end{aligned}$$

Where:  $K_{obs}^2$  is the number of sibships with two sisters that are observed in the sampled population;  
 $K_{true}^2$  is the true number of sibships with two sisters in the population;  
 $K_{miss}^2$  is the number of sibships with two sisters that are not represented in the sampled population due to zero-survivor bias;  
 ${}_a q_0^1$  is the cumulative probability of death for the first sister in five-year age-group  $a$ ;  
 ${}_a q_0^2$  is the cumulative probability of death for the second sister in five-year age-group  $a$ .

If there is only one sister within the 15 to 49 age range, the equations are different than above because the second sister does not contribute to the probability of the sibship being observed in the sample:

$$\begin{aligned} K_{obs}^2 &= K_{true}^2 * (1 - {}_a q_0^1) \\ K_{miss}^2 &= K_{true}^2 * {}_a q_0^1 * {}_a q_0^2 + K_{true}^2 * {}_a q_0^1 * (1 - {}_a q_0^2) \\ \therefore K_{miss}^2 &= \frac{K_{obs}^2}{1 - {}_a q_0^1} * {}_a q_0^1 * {}_a q_0^2 * \frac{K_{obs}^2}{1 - {}_a q_0^1} * {}_a q_0^1 * (1 - {}_a q_0^2) \end{aligned}$$

Both this analysis and Obermeyer et al take into account time prior to the survey in the logistic regression to model mortality.<sup>16</sup> This current analysis, however, provides an updated method for recall

bias adjustment. After  ${}_{45}q_{15}$  has been estimated for each of the four surveys, the estimates are combined and paired up for all periods where they overlap. This overlap occurred when there were at least two surveys carried out in the same country within 15 years of each other. In GBD2013, we estimated adult mortality from sibling histories for three five-year periods prior to the survey date. This is changed in GBD2015 where single year  ${}_{45}q_{15}$  estimates from sibling survival were generated using the same methodology to account for the changing level and trends of  ${}_{45}q_{15}$  within the 15 year period covered by sibling survival module. This generates pairs of estimates in years where there are overlapping surveys. For each of these pairs, we calculate the difference in the years of recall as the interval between when the two surveys were conducted and we also calculate the magnitude of the difference between the two estimates of  ${}_{45}q_{15}$ . We then estimate the linear regression model shown in the below equation to quantify the relationship between years of recall and level of mortality separately for each sex of sibling:

$$\Delta({}_{45}q_{15})_{i,j} = \beta * \Delta(\text{survey date})_{i,j} + \xi$$

Where:  $\Delta({}_{45}q_{15})_{i,j}$  is the difference in  ${}_{45}q_{15}$ ; and  
 $\Delta(\text{survey date})_{i,j}$  is the difference in survey date for survey pair  $j$  in country  $i$ .

Upper and lower uncertainty intervals were also derived. The coefficient on recall period represents the effect of recall bias and was used to adjust the  ${}_{45}q_{15}$  estimates to account for that bias.

### 2.3 Completeness data synthesis

Once we have obtained a full series of under-5 completeness estimates for each country source we fit the model described in the equation:

$$\log_{10}(c_{i,s,t}^{\text{adult}}) = \alpha + \beta_1 * \log_{10}(c_{i,s,t}^{\text{child}}) + \gamma_1^{\text{SR}} + \gamma_2^{\text{SR}} * \log_{10}(c_{i,s,t}^{\text{child}}) + \gamma_1^{\text{R}} + \gamma_2^{\text{R}} * \log_{10}(c_{i,s,t}^{\text{child}}) + \eta_{i,s} + \xi_{i,s,t}$$

Where:  $c_{i,s,t}^{\text{adult}}$  is completeness of adult deaths registration in country  $i$ , source  $s$ , at time  $t$ ;  
 $c_{i,s,t}^{\text{child}}$  is completeness of child deaths registration in country  $i$ , source  $s$ , at time  $t$ ;  
 $\gamma$  terms are random effects at the region (R) and super-region (SR) level;  
 $\eta_{i,s}$  is a random effect at the country and source level; and  
 $\xi_{i,s,t}$  is an error term.

This model relates adult completeness to under-5 completeness and includes super-region and region-level random effects to allow for differences in both the average level of adult completeness and the relationship between child and adult completeness at these levels. The country-source random effect captures the fundamental difference in level of completeness between different data sources.

A  $\log_{10}$  transformation is employed to make over- and under-completeness symmetric (e.g., 50% complete and 200% complete are symmetric around 0 when  $\log_{10}$  transformed) and to simplify calculation of the variance of completeness estimates in  $\log_{10}$  space, which is needed for the adult mortality estimation process. Also, to avoid allowing outlying DDM-derived estimates of adult completeness from unduly influencing the predictions from the model in the equation above, for any

given set of three DDM estimates (GGB, SEG, GGBSEG) calculated from a single pair of censuses, the estimate that is furthest from 1 (i.e., complete) is excluded.

For each country-source  $\log_{10}(c_{i,s,t}^{\text{adult}})$  is predicted from coefficients estimated in the model above and child completeness. Not every country can be used to fit this model as DDM cannot be applied in some cases due to lack of appropriate census data. However, because the coefficients used for prediction are at the region and super-region level, predictions from this model can be generated for all countries where estimates of child completeness are available. We do not believe that the same relationship between adult and child completeness exists for registration-based sources as for recall-based sources, so the above model is applied only to registration-based sources (primarily VR data but also sample registration systems). For sources that only include household death recall, we set an arbitrary value of 1 for the first stage values instead of making predictions from completeness from child age groups for the aforementioned reason. However, it should be noted that this set value by no means reflects the true completeness of adult age groups in the household death recall sources and it will change once we apply the spatial-temporal regression in the second-stage estimation.

In the second stage, we calculate the residuals from the first stage and apply spatial-temporal smoothing to these residuals. The predicted residuals are then added back onto the first-stage predictions, generating the second-stage predictions. Spatial-temporal smoothing is carried out in the same way as in the adult mortality estimation process with three modifications: the  $\lambda$  and  $\zeta$  parameters are set to 2.0 and 0.95; only the fixed effect local regression variant is used; and the residuals are not held constant out of sample. The registration-based sources and the non-registration-based sources are handled separately in this step.

The variance of the completeness estimates must also be calculated, as this information is utilized in the adult mortality estimation process. To do this, we approximate the variance based on the median absolute deviation (MAD) compared to the second-stage estimates. We calculate variances at the regional level and do so separately for registration-based sources and other sources. Then, for each country-source-year, we generate 10,000 simulations from a normal distribution with mean equal to the second-stage prediction for that year and variance calculated as just described. For non-registration-based sources we believe that both under- and over-reporting are possible (over-reporting may occur due to telescoping of events outside of the recall period into the recall period), and so for these sources we now exponentiate the 10,000 simulations and find the mean, which serves as the final prediction for completeness. For registration-based sources we believe that only underreporting is possible, so for these sources we first truncate any simulations above 1 to 1 and then exponentiate the 10,000 simulations to find the truncated mean, which will serve as the final prediction for completeness. In both cases, before exponentiating the simulations, the variance of the simulations is calculated, and used as the variance of the completeness estimates in the adult mortality estimation process.

The final completeness estimates are used to adjust, where appropriate, the corresponding country-source-years before these data are used in the adult mortality estimation process. For countries in which we believe males and females have differential completeness, we carry out the above process separately by sex. For a small number of data points, completeness cannot be estimated using the procedure described above due to a lack of appropriate census data, and the original growth balance

method is the only viable option.<sup>12</sup> In previous papers, we have included a selected number of data points derived from household recall of deaths to which the Brass growth balance method had been applied. Our simulation studies suggest this method is extremely imprecise, so we have excluded these points from the analysis. This accounts for why the number of household recall of deaths data points has decreased in this analysis compared to Lozano et al.<sup>20</sup>

## 2.4 45q15 data synthesis using non-linear mixed effects model and ST-GPR

### 2.4.A. Overview of adult (45q15) mortality estimation

For each country, we generated a time series of  ${}_{45}q_{15}$  estimates. We modeled the underlying mortality risk separately from excess mortality due to fatal discontinuities. To model the underlying mortality risk we relied on a three-stage process that incorporates all data in our database for each country after excluding data identified as outliers or that refer to years identified to contain mortality shocks from conflict or natural disaster. In the first stage, we applied a nonlinear mixed effects model which used covariates to explain variation in  ${}_{45}m_{15}$ . In the second stage, we exploited spatial and temporal correlation in the residuals from the first stage regression by performing a smoothing process on these residuals. The smoothed residuals were then added back into the first stage regression predictions to produce an updated time-series of  ${}_{45}q_{15}$  for each country. In the third stage, we applied Gaussian process regression (GPR) which synthesizes information from the second stage predictions and the observed data. After applying this procedure to generate estimates of the underlying mortality risk, we modeled abrupt changes in mortality by estimating the excess risk of mortality in years identified as containing a conflict or natural disaster. This estimated excess mortality risk was then added to the underlying mortality risk to produce our final time series of  ${}_{45}q_{15}$  estimates. All analyses were carried out in Stata 13.1, R 3.0.2, and the PyMC package, version 2.0, in Python 2.5.4. A more complete description of the various stages of our modeling strategy is given below.

### 2.4.B. First stage nonlinear mixed effects regression

The first stage nonlinear regression models country/year/sex-specific adult mortality rate using key covariates: lag distributed GDP per capita, mean years of education in age group 15 to 59, and crude death rate due to HIV/AIDS in age group 15 to 59. We use the nonlinear mixed effects model specified in the equation below. This model was fit separately for males and females.

$${}_{45}m_{15}^{\text{observed}} = \exp(\beta_1 + \beta_2 \cdot \text{Edu} + \beta_3 \cdot \ln(\text{LDI}) + \gamma_{\text{country}}) + \beta_4 \cdot \text{HIV} + \varepsilon$$

Edu is the mean years of education for the age group 15 to 59; LDI is lagged distributed income;  $\gamma_{\text{country}}$  is a country-level random effect; and HIV is the crude mortality rate from HIV for ages 15 to 59. We initialized the model with starting values for each of the  $\beta$  coefficients equal to 0. We tested our model with different starting values, including values from a hierarchical linear mixed effects model, and found that this model was not sensitive to starting values.

The final stage one predictions were based on predictions from the model, the above equation excluding the country random effect. We excluded the country random effect to facilitate modeling spatial trends in mortality in the second stage. The model predictions were then converted from  ${}_{45}m_{15}$  to  ${}_{45}q_{15}$  to be put into the second stage model described next.

### 2.4.C. Second stage spatial-temporal smoothing of residuals

The first stage regression model reflects the explanatory power of the set of covariates but, as might be expected, fails to explain all of the variation in  $_{45}Q_{15}$ . The residuals from the first stage regression are correlated in both time and space, indicating that  $_{45}Q_{15}$  is correlated in time and space in ways that are not fully captured by the covariates included in this regression. We exploited this remaining pattern of variation by applying a local regression to the residuals from the first stage regression, effectively smoothing across time and space.

The local regressions were fitted separately for each of the 21 GBD regions which have been constructed so that countries within each region share similar epidemiological profiles.<sup>[21]</sup> We applied two variations of local regression to the first stage residuals, both of which utilized the same weighting scheme to incorporate temporal and spatial relatedness. In both variants, a set of weighted linear regressions, one for each country-year of interest, were undertaken. When carrying out the regression for a given country-year of interest, all residuals in the dataset were weighted with respect to this country and year. We first weighted residuals with respect to time using a weighting function similar to that utilized in Loess regression:

$$w_t = \left( 1 - \left( \frac{|r_t - r_{est}|}{1 + \operatorname{argmax}_t |r_t - r_{est}|} \right)^\lambda \right)^3$$

The  $r_t$  and  $r_{est}$  terms are, respectively, the year of interest and the year of the residual being weighted. The  $\operatorname{argmax}_t |r_t - r_{est}|$  term is the maximum distance between the year of interest and a residual within the region. The  $\lambda$  parameter in this weighting function dictates how quickly the weights fall off as the distance in time increases: a larger  $\lambda$  implies that the assigned weights will diminish slowly with time, while a smaller  $\lambda$  allows the weights to diminish more rapidly with time.

We then weighted residuals with respect to space by modifying the time weights described below. Weights for residuals within the country of interest were multiplied by a factor of:

$$\frac{\zeta \sum_{i \notin c_{est}} w_i}{(1 - \zeta) \sum_{i \in c_{est}} w_i}$$

where  $c_{est}$  is the country of interest and  $w_i$  are the time weights described above. As a result of this modification,  $100 \cdot \zeta$  % of the total weight was placed on residuals within the same country, and the remaining  $100 \cdot (1 - \zeta)$  % of the weight was placed on residuals from other countries in the region. For countries with no residuals (i.e. countries with no data) the above factor is 0 and there was no re-weighting: consequently all of the weight remains, by necessity, in other countries in the region. We set  $\lambda$  to 0.8 and  $\zeta$  to 0.8 based on an examination of country plots under various different settings of both parameters through iterative testing.

The first local regression variant, which we call linear local regression, is described below and is a weighted linear regression of the residuals on year and an indicator of the residual from the country currently being estimated (if this indicator cannot be estimated, i.e. because there are no residuals in a given country, it is dropped):

$$r_{est} = \beta_0 + \beta_1 t + \beta_2 c_{est} + \varepsilon$$



The second variant, which we call fixed effects local regression, used a weighted linear regression with no covariates. This is equivalent to a simple weighted average of the residuals.

Linear local regression incorporates information from covariates, in this case year, but extrapolation is heavily based on this covariate and in settings with sparse data this can result in implausible out-of-sample predictions. In contrast, fixed effects local regression does not incorporate an explicit time-trend and does not suffer from this problem in extrapolation, but also is less adequate at fitting the data in countries with many observations. We therefore chose to combine the estimates from both variants. As described in the below equation, we calculated the data density,  $d_c$ , for each country we estimated,  $c_{est}$ , and then calculated a weighted average of the predictions from the linear local regression and fixed effects local regression where  $d_c\%$  of the weight is assigned to the linear local regression and the rest to the fixed effects local regression. In this way, the final estimates for countries with more vital registration data are more heavily informed by the linear local regression and the final estimates for countries with less (or no) vital registration data are predominately informed by the fixed effects local regression, as is appropriate given the strengths and weaknesses of these two variants.

$$d_c = 100 * \left( \frac{\# \text{ VR points in } c_{est}}{\text{Maximum \# VR points in any country in the region}} \right)$$

Residuals were logit-transformed before undergoing this smoothing; once the final estimates of the smoothed residuals were obtained for every country-year, these estimates were added back into the logit transform of the first stage regression predictions. This sum was then reverse-logit transformed; by carrying out the first two stages in logit-space we restricted the predictions to between 0 and 1. These predictions are called the second-stage predictions.

#### 2.4.D. Model

The third stage of our prediction method is a Gaussian process regression (GPR) based on the model given in below where  $\mu_t$  is the true  $\log_{10}(45q_{15})$  at time  $t$ ,  $f(t)$  is the baseline mortality risk, and  $S_t$  captures excess mortality due to war and disasters.  $S_t$  is estimated independently of  $f(t)$  as described in a later section.  $M$  and  $C$  describe the Gaussian process, giving the mean and covariance, respectively.

$$\mu_t = f(t) + S_t$$

$$f(t) \sim \text{GP}(M, C)$$

For the Dominican Republic, Peru, and Madagascar, a slightly different model, described in the equation below, is used. For these countries, measurements from sibling histories and from vital registration are at different levels and the direction of the bias in each source is unknown. We therefore used a model which includes a bias term for each source ( $\beta_s$ ).

$$\mu_t = f(t) + \beta_s + S_{t,s}$$

$$\beta_s \sim \text{Normal}(0, 0.01^2)$$

$$f(t) \sim \text{GP}(M, C)$$

Gaussian process regression is a method of Bayesian inference. We specified a prior distribution for  $f(t)$ , and a likelihood function which describes the data generation process; the specified prior distributions

and likelihood function are described in subsequent sections. We then used Markov Chain Monte Carlo (MCMC) to approximate the posterior distribution of  $f(t)$  which also incorporates information from the observed empirical estimates of adult mortality. An MCMC chain of length 5,000 was produced; the first 3,000 samples were discarded and the remaining 2,000 were thinned by a factor of 2 for a total of 1,000 simulations retained. The reported best estimates and confidence intervals were generated from the mean and the 2.5<sup>th</sup> and 97.5<sup>th</sup> percentiles of the 1,000 samples, respectively.

#### 2.4.E. Priors

The prior distribution of  $f(t)$  can be described in terms of the mean prior—the prior for  $M$ —and the covariance prior—the prior for  $C$ . We utilized the second stage predictions as the mean prior and used a Matérn covariance function to describe the covariance prior. This covariance function incorporates three parameters: the amplitude, which controls the amount by which realizations of the Gaussian process distribution can deviate from the mean function, the scale, which controls the distance over which the function is correlated, and the degree of differentiability, which influences the smoothness of the samples from the Gaussian process.

We set the differentiability to 0.8 in countries with only complete VR data and to 2.0 in other countries. We used a lower differentiability in countries with complete VR data because in these countries we want the final estimates to follow the data closely even if the trend described is not smooth. In contrast, in countries where the data are less reliable we don't want the final estimates to be overly influenced by individual data points.

We selected prior values for the amplitude and scale based on model performance as assessed by out-of-sample predictive validity. We tested five values of the scale—10, 15, 20, 25, 30—and five values of the squared amplitude—1, 2, 3, 4, and 5 times the mean squared error of the residuals from the second stage prediction model—for a total of 25 combinations of parameters. The out-of-sample predictive validity was assessed for each parameter combination by repeatedly dividing the data available into training and testing sets, fitting the model on the training sets and comparing the predictions to the corresponding data in the testing set.

We divided the data into testing and training sets 100 times. Data were divided as follows: for each region, a number  $X$  between 10 and 20 was sampled and the most recent  $X$  years of data in that region were assigned to the testing set. Then a number  $X$  between 5 and 10 was sampled, a country from within the region was sampled, and a year where there were data in that country was sampled. All data within  $X$  years of the selected year in the selected country were assigned to the testing set. This was repeated as many times as there are countries in the region; because iterations of this procedure were independent, the data selected for the testing set may overlap. Any data that were not selected for the testing set were included in the training set.

For each testing and training division, the second stage model was fit on the training data. Then the third stage model was also fit on the training data using each combination of scale and squared amplitude values tested for a total of 25 sets of predictions. The testing data were matched to the predictions in the corresponding country and year for each of the 25 sets of predictions. For each match

we calculated the absolute relative error of the prediction compared to the empirical estimate in the testing set. We also classified each empirical estimate in the testing set as being covered or not covered by each corresponding prediction. The determination of coverage was made by calculating total variance—the sum of the variance of the empirical estimate (described below) and the variance of the GPR estimate—and then calculating a 95% confidence interval around the prediction based on this total variance and assuming a normal distribution. If the empirical estimate was within this confidence interval, it was classified as covered, and otherwise not.

Once this procedure was carried out for all 100 testing and training divisions of the data, we calculated the mean absolute relative error and the mean coverage for each combination of GPR parameters across all 100 sets of predictions. The ideal set of parameters would produce estimates with low mean absolute relative error and mean coverage close to 0.95. We used the function described below to calculate a loss metric which incorporates both the coverage and the absolute relative error into a single measure to assess performance. Parameter combinations with lower values of this loss metric were considered preferable.

$$\text{Loss} = \begin{cases} \text{if coverage} \leq 0.95: (0.95 - \text{coverage})/5 + (\text{absolute relative error}) \\ \text{if coverage} > 0.95: (\text{coverage} - 0.95)/1 + (\text{absolute relative error}) \end{cases}$$

The optimal parameters may differ from country to country. To allow for this, we calculated the loss function described above separately for seven distinct groups of countries. These groups of countries are defined by the type of data which are available for estimating mortality: countries with complete VR only, countries with VR only (some or all of which is incomplete), countries with VR and other data, countries without VR data but with sibling histories, and the remaining countries. The first two groups listed are further subdivided into ‘small’ and ‘large’ population countries based on a population threshold of 50,000 people between ages 15 and 49 years. For countries with no data, the highest of all selected scales and squared amplitudes from among all other countries was used.

#### 2.4.F. Likelihood

The likelihood describes the probability of observing the data given a particular set of parameters. As shown in the below equation, we used a normal model for describing the probability of observing a particular value of  $\log_{10}({}_{45}q_{15})$  where the mean is given by  $f(t)$  and the variance by  $V_t$ , the data variance.

$$\log_{10}({}_{45}q_{15t}) \sim \text{Normal}(f(t), V_t)$$

Data variance was calculated for each empirical observation of  ${}_{45}q_{15}$  and incorporated both sampling and non-sampling variation. The method for calculating the data variance depended on the type of data: for estimates derived from complete vital registration data we assumed that there was no non-sampling variance and included only sampling variance as computed from a binomial model. We set  $N$  equal to the national population aged 15 to 59 years and  $p$  equal to the mortality rate,  ${}_{45}m_{15}$ . We calculated the variance of  ${}_{45}m_{15}$  from  $p(1-p)/N$  and then transformed this to the variance of  $\log_{10}({}_{45}q_{15})$  using the delta method. For estimates derived from incomplete vital registration data, we wanted to include not only sampling variance but also the non-sampling variance that arises from uncertainty in the completeness estimate. For these data, the total data variance was given by the sum of the sampling variance

(calculated as for complete vital registration data) and the variance of the completeness estimate (calculated as described in section 2.3).

For estimates derived from sample registration systems or surveys where completeness has been assessed in the normal ways, the above procedures for complete and incomplete vital registration were followed, but the national population size was replaced with the appropriate population size for the given system or survey. For estimates derived from sources other than sibling histories where completeness could not be assessed or was assessed by the growth balance method, the highest data variance generated by the above three procedures within the same region was assigned. Finally, for estimates derived from sibling history data, the mean absolute deviation (MAD) estimator of the variance was calculated with reference to the first stage predictions, as described in the equation:

$$\theta_{r,s}^2 = (1.4826 \cdot \text{MAD}_{r,s})^2 = 1.4826 \cdot \text{median} \left( \left| \log_{10}({}_{45}q_{15}^{\text{observed}}) - \log_{10}({}_{45}q_{15}^{\text{predicted}}) \right| \right)^2$$

#### 2.4.G. Hyper-parameter selection for adult mortality rate ST-GPR

Similar to the new parameter selection process for U5MR, we have also expanded the scope of our parameter selection for adult mortality rate (45q15) to include variables used in space-time smoothing. The out-of-sample predictive validity testing used to select space-time and GPR parameters for adult mortality rate follows.

For space-time smoothing, we tested  $\zeta$  values of 0.7, 0.8, 0.9, and 0.99 and  $\lambda$  values of 0.1 to 0.9 in increments of 0.1. We test five values of the scale—5, 7.5, 10, 12.5, 15, 17.5, 20 -- and five values of the squared amplitude—1, 1.5, 2, 2.5, and 3 times the mean squared error of the residuals from the second-stage prediction model. Because we tested combinations of both space-time and GPR parameters, this led to 1,260 combinations of ST-GPR parameters being tested in the process.

We divided the data into testing and training sets 100 times. Data were divided as follows: for each region, a number X between 10 and 20 was sampled and the most recent X years of data in that region were assigned to the testing set. Then a number N between 5 and 10 was sampled, a country from within the region was sampled, and a year where there is data in that country was sampled. All data within N years of the selected year in the selected country were assigned to the testing set. This was repeated as many times as there are countries in the region; because iterations of this procedure were independent, the data selected for the testing set may overlap. Any data that were not selected for the testing set were included in the training set.

We then ran Space-time smoothing and Gaussian process regression with the training data set using each set of parameters being tested to generate estimates for each location and every year in both the training and testing data set.

Within a given iteration we calculate the absolute relative error of the GPR estimate compared to each empirical estimate in the testing set. We also classify each empirical estimate in the testing set as covered or not covered. The determination of coverage is made by calculating total variance—the sum of the data variance and the variance of the GPR estimate—and then calculating a 95% uncertainty interval around the GPR estimate based on this total variance and assuming a normal distribution. If the empirical estimate is within this uncertainty interval, it is classified as covered, and otherwise not. For each combination of parameters, we calculate the mean absolute relative error and the mean coverage

across all iterations from all countries within a particular group. The loss function described below is then calculated for each parameter combination, and the parameter combination with the lowest loss is selected for each group;

$$\text{loss} = (0.95 - \text{coverage}) / 5 + (\text{absolute relative error})$$

Countries with at least 20 years of VR data were assigned their own parameters. Other locations were grouped based on how much and what type of data they had available. A set of parameters was then applied to all locations in that group. A summary of these groups is in the following table:

| <b>Group</b>                       | <b>Conditions</b>                                                                        |
|------------------------------------|------------------------------------------------------------------------------------------|
| Sparse data, with complete VR only | Only complete VR, more than 10 years of VR, with VR after 1980                           |
| Spare data, VR only                | At least some incomplete VR, more than 10 years VR, with VR after 1980                   |
| Sparse data, VR +                  | At least some incomplete VR, with either fewer than 10 years of VR or all VR before 1980 |
| Sparse data, other                 | No VR or sibling data                                                                    |
| Sibling data, small                | No VR, less than 21 years of sibling data                                                |
| Sibling data, large                | No VR, more than 21 years of sibling data                                                |
| No data                            | No data                                                                                  |

For countries with no data, the highest of all selected scales and squared amplitudes from among all other countries was used.

In some cases, we restricted the universe of possible parameters. Most of these restrictions occurred for the  $\lambda$  parameter. For many locations with complete VR, we knew that higher lambda values would result in a larger confidence interval than would be appropriate. We also included a lower limit of  $\lambda$  for some locations with either incomplete VR or no VR, so that confidence intervals would reflect the uncertainty of these data. For example, in locations where we only had sibling history data, we restricted lambda to being greater than 0.5. We also made some other manual exceptions to  $\lambda$ ,  $\zeta$ , and scale where results did not pass the common sense test.

We set the differentiability to 0.8 in countries with only complete VR data, excepting those in the Caribbean, Oceania, and the country of Mauritius, and to 2.0 in other all other locations. We used a lower differentiability in countries with complete VR data because in these countries we want the final estimates to follow the data closely even if the trend described is not smooth. In contrast, in countries where the data are less reliable we don't want the final estimates to be overly influenced by individual data points.

#### 2.4.H. Accounting for the uncertainty in HIV covariate in the first stage model for high HIV/AIDS burden locations

To account for the uncertainty in estimated crude death rate due to HIV, a key covariate for the first stage model described in section 2.4.B, we generated draw level crude death rate due to HIV for Group 1 locations (detailed in section 4.6 and Appendix Table 1) and repeated the first stage model and ST-GPR processes described in sections 2.4B-2.4F 250 times using 250 unique draw level crude death rate due to HIV derived from our EPP-Spectrum process. We repeated this process 250 times to balance between computation intensity and obtained increases in the estimated uncertainty interval for 45q15. For each one of the 250 ST-GPR runs, 4 draws were selected out of 1,000 to form the final 1,000 draws of 45q15 for each location over time.

#### 2.5 Identify and remove outliers

To arrive at sensible level and trends in adult mortality rate, certain outliers were excluded from our ST-GPR regression process. In general, we used the following process to outlier influential raw data points that otherwise lead to erroneous without fatal discontinuity 45q15 estimates:

1. Raw input 45q15 data points from years affected war, natural disasters, and other fatal discontinuities as defined in GBD 2015 are excluded from the analysis described in section 2.4.
2. Examination of survey/registration data quality leads certain raw data to be outliered. Such examples include the Afghanistan 2010 Mortality Survey that was not national representative, and some of the vital registration data from Serbia that didn't include deaths from Kosovo.
3. Visual inspection of raw input data on 45q15 and estimated time series estimates of 45q15 from ST-GPR by GBD researchers and country experts through the GBD collaborator network. Data points are outliered when it is unexplainably different from other adjacent points from the similar source indicating a data reporting issue and compilation error in the direct sources where such data was obtained. Some subnational level single year 45q15 estimates from sibling survival methods are excluded for unreasonably high or low estimates due to small sample sizes.

#### 2.6 Rake subnational estimates to national level (excluding South Africa)

First, we randomize the order of the 1,000 subnational-level draws and the national draws separately to avoid any correlation between subnational and national draws that may have been introduced in prior processes.

GBD 2015 provides estimates of 45q15 for 561 locations at both subnational and national level. While it is absolutely essential to use input data from the subnational level in informing the level and trend of 45q15 for the corresponding location, it is often the case that we tend to have more robust data at the national level, more data sources and data sources that cover longer time periods. To have consistent estimates between aggregated subnational level estimates and the separately estimated national level estimates, we rake the subnational 45q15 to match our national level 45q15 estimate by using the following formulas:

$${}_{45}q_{15}^{s'} = 1 - e^{-45 \cdot {}_{45}M_{15}^s \cdot r}$$

and

$$r = \frac{\ln(1 - {}_{45}q_{15}^N) / -45}{\sum_{s=1}^n \ln(1 - {}_{45}q_{15}^s) \cdot \frac{P_s}{P_N} / (-45)}$$

In the above equations,  $s$  refers to subnational locations within a country  $N$ ,  $p$  is population in age group 15 to 59, and  ${}_{45}q_{15}$  are estimates of adult mortality rate from the ST-GPR process, and  ${}_{45}q_{15}^s$  is the post-raking  ${}_{45}q_{15}$  for subnational locations.

## 2.7 Review estimates for quality

The preliminary estimates of adult mortality rates are reviewed by both the researchers who work on the demographic estimation process and the GBD all-cause mortality collaborator network. Concerns regarding quality of certain survey and data points are raised and reviewed which lead to revision of the database where applicable.

## 2.8 ${}_{45}q_{15}$ estimates with HIV

The results of the adult mortality rate ST-GPR process are estimates of probability of death from all causes of death except fatal discontinuities for all locations covered in GBD 2015 for 1970 to 2015.

## 2.9 HIV-free ${}_{45}q_{15}$

As a result of the non-linear mixed effects model used in the first stage before ST-GPR, we also generate HIV-free counterfactual  ${}_{45}q_{15}$  by removing the impact of HIV, as specifically measured by crude death rate due to HIV/AIDS estimated in the EPP-Spectrum process (described in the HIV/AIDS model in Part 3), from all-cause  ${}_{45}q_{15}$  without fatal discontinuity.

# Section 3. Model life table system

## Overview

For many purposes, estimates of age-specific mortality rates are useful. In settings without complete VR systems, data are often available for some summary measures of mortality such as under-5 mortality rate (henceforth  ${}_5q_0$ ) from complete or summary birth histories and mortality from ages 15 to 60 from sibling histories ( ${}_{45}q_{15}$ , and commonly described as adult mortality rate). Model life tables, which are structured relationships between levels of age-specific mortality at different ages, can be used to generate an estimate of age-specific mortality for detailed age-groups from summary measures of mortality on children and adults ( ${}_5q_0$  and  ${}_{45}q_{15}$ , respectively). Model life tables have many other applications as well, such as simplifying the task of mortality projection or updating life tables from the most recent empirically observed data. This is true even for countries with good VR systems due to the fact that compilation and publication of VR data may take years.

An ideal model life table system has several desirable attributes. First, a model life table system should be parsimonious and require only a few entry parameters to generate a full life table with age specific mortality rates. Second, it should adequately capture the range of age patterns of mortality observed in

real populations and yield high predictive validity, not just measured by summary indices such as life expectancy at birth, but more importantly by age-specific mortality rates. Third, it should provide satisfactory estimates of age-specific mortality for countries with high levels of mortality, especially those with substantial HIV/AIDS epidemics. Finally, a model life table should generate age-specific mortality with a plausible time trend, and the partial derivative of age-specific mortality should be positive with respect to entry parameters such as  ${}_5q_0$  and  ${}_{45}q_{15}$ .

A simple and somewhat flexible model life table system was proposed by Brass.<sup>18</sup> He observed that in general the logit of the  $l_x$  (proportion of a hypothetical birth cohort still alive at age  $x$ ) column in a life table could be represented as a linear transformation of the logit of the  $l_x$  column of a reference standard life table. Murray et al noted that as a population moved further away from the levels of mortality in the reference standard, the assumption of linearity in logit  $l_x$  space was violated.<sup>19</sup> A series of age-specific modification factors were proposed that allowed for the characteristic bending of the logit  $l_x$  function compared to the standard. Murray et al also assessed the ability of this modified logit life table system to predict age-specific mortality rates. The modified logit life table system with its built-in optional mechanism of predicting adult mortality ( ${}_{45}q_{15}$ ) from child mortality ( ${}_5q_0$ ) has been extensively used by the World Health Organization since the early 2000s.

This system, however, suffers from two major limitations. First, when adult mortality is very high relative to child mortality, such as in the presence of an HIV/AIDS epidemic, the age patterns of mortality generated do not fit well to the observed data. Second, when the modified logit life table system is applied to time series of  ${}_5q_0$  and  ${}_{45}q_{15}$ , paradoxical trends can be generated where adult and child mortality are declining, but predicted age-specific death rates in some age groups are increasing. We have extended the modified logit life table system to deal with these two major limitations. Wang et al provide a more complete discussion of the development of this approach.<sup>2,4</sup> We summarize these developments in brief here. There are four distinct steps.

### 3.1 Building empirical model life table database: data sources and quality review

Relational model life table systems critically depend on the empirical database used to generate model life table standards and test the predictive validity of model life tables. For both all-cause mortality and cause-specific mortality analysis in GBD, we have amassed a comprehensive database on human mortality from censuses, Vital Registration systems, sample vital registration systems such as SRS from India and Disease Surveillance Point system from China, and the Human Mortality Database. These aforementioned data sources provide a total of 38,460 empirical life tables. After removing duplicated empirical life tables between Human Mortality Database and vital registration sources, we have closely examined every single empirical life table by applying the following quality control process to further remove life tables with irregular/impossible age pattern of mortality:

- a. Empirical life tables with Irregular age pattern of mortality such as probability of death in age group 1-4 higher than first year of year are dropped;
- b. Empirical life tables where age pattern of mortality doesn't conform to Gompertz law of mortality between age 40 and 80 are dropped.

Murray et al. used a database of 3,566 life tables covering 63 countries.<sup>22</sup> We have expanded this



database to include 16,507 empirical life tables. Two major data sources provide about 97.0% of these life tables. The Human Mortality Database (HMD)<sup>23</sup> has over 8,400 life tables from 37 countries or areas dating back to 1,751. A total of 4,147 life tables from this database dating between 1950 and 2014 are included in our database. We excluded life tables of poor quality and those from years affected by wars and pandemic. The other major source of empirical life tables is the collection in which VR data have been evaluated using death distribution methods, as revised by Murray and colleagues (2010) and Wang et al (2014).<sup>24,25</sup>

It is our view that accuracy of the age pattern of mortality in the raw data is to a certain degree correlated with the completeness of the data. We did make certain exceptions for the purpose of including age pattern of mortality from regions that otherwise won't be represented in our database with the strict completeness threshold. In all cases, rigorous assessment of the quality of these data is conducted. In total, we included 11,867 life tables from various VR sources including subnational VR from Mexico, Brazil, and United States, Disease Surveillance Point system, and sample registration system that are adjusted by GBD's completeness assessment process as detailed in section 2.1.

In building the empirical life table database for the model life table system used by GBD, we examined additional data sources that we decided to exclude from our database. These included VR sources deemed incomplete and life tables with implausible patterns or high levels of stochastic fluctuation among age groups.

In addition, all life tables in our database with crude death rate due to HIV/AIDS in adult age groups over 0.1% are excluded in the process described in section 3.3.

### 3.2 Extending age-specific mortality to age 100+

To extrapolate age-specific mortality beyond age 85, the Gompertz law of mortality and other functional model age pattern of mortality methods are generally used.<sup>26,27</sup> Here, we have developed a new model with better predictive validity than existing methods. Age-group dummies and probability of dying from age 80 to 84 in logarithmic scales are used to estimate the difference in age-specific probability of dying in logit scale between two consecutive age-groups, as described in the following equation:

$$\text{logit} \left( {}_5q_x^{j,t,g} \right) - \text{logit} \left( {}_5q_{x+5}^{j,t,g} \right) = \alpha^g + \beta_x^g \cdot \text{age} + \gamma^g \cdot \text{logit} \left( {}_5q_{80}^{j,t,g} \right) + \eta_j^g + \xi_x^{j,t,g}$$

Here,  $j$  refers to country,  $g$  refers to sex, and  $t$  refers to time. Parameters are estimated using data from selected countries in Human Mortality Database with high quality VR data in the oldest old age groups above age 80.<sup>23</sup> The parameters estimated from the above model are then used to generate age-specific probability of death from age 85 to 109.

### 3.3 GBD relational model life table system with a flexible standard selection mechanism

The relational model life table system is based on the logic that in order to capture the very high levels of younger adult mortality seen in populations with high HIV prevalence, we needed to develop a model life table for a counterfactual population without HIV and then add on the effects of HIV by age and sex.

This system is captured in three components. We first estimated counterfactual levels of  ${}_5q_0$  and  ${}_{45}q_{15}$  in the absence of HIV. The empirical approach taken for this step is explained below. Then a full set of age-specific death rates were generated using the model life table system from the counterfactual levels of child and adult mortality. Finally, the increase in mortality, specific to each age group, associated with HIV was estimated.

### 3.3.A. Model for populations free of HIV/AIDS

In terms of estimating a set of age-specific death rates from  ${}_5q_0$  and  ${}_{45}q_{15}$  using a relational model life table, we have undertaken several innovations. A key change from previous relational model life table systems is the shift to modeling  $q_x$  in logit space rather than the  $l_x$  in the same space. Modeling  $q_x$  enables us to more precisely capture the different impacts of changes from the two entry parameters ( ${}_5q_0$  and  ${}_{45}q_{15}$ ) on different age-groups. The following equation provides the life table for populations not affected by HIV/AIDS.

$$\begin{aligned} \text{logit}({}_nq_x^c) = & \text{logit}({}_nq_x^s) + \beta_x^1 \cdot (\text{logit}({}_5q_0^c) - \text{logit}({}_5q_0^s)) \\ & + \beta_x^2 \cdot (\text{logit}({}_{45}q_{15}^c) - \text{logit}({}_{45}q_{15}^s)) + \xi_x \end{aligned}$$

Where:  $\text{logit}({}_{45}q_{15}^s)$  is the logit transformation of the  ${}_{45}q_{15}$  in the standard life table (development of the standard life table is presented below);

$\text{logit}({}_{45}q_{15}^c)$  is the logit transformation of the  ${}_{45}q_{15}$  value for a country without HIV or the counterfactual level of  ${}_{45}q_{15}$  in the absence of HIV in a country affected by HIV/AIDS;

$\text{logit}({}_5q_0^s)$  is the logit transformation of the  ${}_5q_0$  in the standard population;

$\text{logit}({}_5q_0^c)$  is the logit transformation of  ${}_5q_0$  for a country without HIV or the counterfactual level of  ${}_5q_0$  in the absence of HIV in a country affected by HIV/AIDS;

$\text{logit}({}_nq_x^s)$  is the logit of the probability of death in the standard population from age  $x$  to  $x + n$ ;

$\text{logit}({}_nq_x^c)$  is the logit transformation of the probability of death from age  $x$  to  $x + n$  in a country without HIV or the counterfactual level of  ${}_nq_x$  in the absence of HIV in a country affected by HIV/AIDS;

$\beta_x^1$  and  $\beta_x^2$  are coefficients that vary by age  $x$  and which measure the impact of differences in child and adult mortality rates between a target life table and the standard life table on the estimated age pattern of mortality. In other words, both coefficients determine how much the estimated age pattern of mortality deviates from the standard by age and from linearity.

This equation proposes that the logit transformed age specific probability of dying in a target life table (c) can be represented as a function of the corresponding logit transformed age specific probability of dying in a standard life table (s) and the differences in probability of dying from age 0 to 5 in logit scale and the difference in probability of dying from age 15 to 60 in logit scale between a pairs of life tables: c and s. Life table c is the estimated HIV-free life table either for a country affected by the epidemic or not. The model is based on an empirical observation where the differences in age specific probabilities of dying in logit scale between two life tables are highly correlated with differences in  ${}_5q_0$  or  ${}_{45}q_{15}$  in logit scale when HIV/AIDS epidemic is not present.

Coefficients  $\beta_x^1$  and  $\beta_x^2$  are estimated using the following equation:

$$\text{logit } {}_nq_x^c - \text{logit } {}_nq_x^s = \beta_x^1 * (\text{logit } {}_5q_0^c - \text{logit } {}_5q_0^s) + \beta_x^2 * (\text{logit } {}_{45}q_{15}^c - \text{logit } {}_{45}q_{15}^s) + \xi_x$$

In estimating the parameters, we use country-time specific and region (i.e. global burden of disease region) specific standard for each life table not affected by HIV/AIDS in our database (other aggregated standard life tables by different geographical or epidemiological clustering criteria are also possible). Country-time specific standard life tables are used whenever an empirical life table from the same country within a 15-year time frame is available in our database. Region specific standard life tables are generated by collapsing all zero-HIV life tables in our database from the same global burden of disease region by sex. We then pair up all zero-HIV life tables in our database with the generated region specific life tables.

The estimated  $\hat{\beta}_x^1$  and  $\hat{\beta}_x^2$  are shown in the table below. We limit the effects of  ${}_5q_0$  and  ${}_{45}q_{15}$  to certain age groups to avoid implausible outputs when  ${}_5q_0$  and  ${}_{45}q_{15}$  from a population change in opposite directions. With the results in the table below, we can generate full life tables for populations not affected by HIV/AIDS. The values of  ${}_5q_0$  and  ${}_{45}q_{15}$  serve as points of entry (or entry parameters) for this model life table system.

**Table: Model life table coefficients**

| Age   | Diff. in ${}_5q_0$ (logit scale) |        | Diff. in ${}_{45}q_{15}$ (logit scale) |        |
|-------|----------------------------------|--------|----------------------------------------|--------|
|       | Male                             | Female | Male                                   | Female |
| 0     | 0.984                            | 0.977  | --                                     | --     |
| 1-4   | 1.023                            | 1.057  | --                                     | --     |
| 5-9   | 0.814                            | 0.763  | --                                     | --     |
| 10-14 | 0.464                            | 0.360  | 0.389                                  | 0.514  |
| 15-19 | 0.156                            | 0.148  | 0.777                                  | 0.783  |
| 20-24 | 0.053                            | 0.148  | 0.807                                  | 0.853  |
| 25-29 | 0.039                            | 0.132  | 0.766                                  | 0.917  |
| 30-34 | 0.023                            | 0.109  | 0.791                                  | 0.912  |
| 35-39 | --                               | --     | 0.880                                  | 1.080  |
| 40-44 | --                               | --     | 0.912                                  | 0.986  |
| 45-49 | --                               | --     | 0.930                                  | 0.922  |
| 50-54 | --                               | --     | 0.903                                  | 0.871  |
| 55-59 | --                               | --     | 0.857                                  | 0.855  |
| 60-64 | --                               | --     | 0.792                                  | 0.841  |
| 65-69 | --                               | --     | 0.780                                  | 0.857  |
| 70-74 | --                               | --     | 0.785                                  | 0.898  |
| 75-79 | --                               | --     | 0.777                                  | 0.898  |
| 80-84 | --                               | --     | 0.675                                  | 0.807  |

Our procedure of standard life table computation takes into account empirical relationships between differences in age pattern of mortality, geography, and time. To generate a standard, we first calculated the Mahalanobis distance between the target life table and all zero-HIV empirical life tables of the same sex in our database based on  ${}_5q_0$  and  ${}_{45}q_{15}$  (in logit scale). The Mahalanobis distance between two sets of  ${}_5q_0$  and  ${}_{45}q_{15}$  are defined as:

$$D_M^i(Q^i) = \sqrt{(Q^i - O)^T S^{-1} (Q^i - O)}$$

Where  $O$  is a multivariate vector representing entry parameters  ${}_5q_0$  and  ${}_{45}q_{15}$  in logit scale.  $Q^i = (\text{logit}({}_5q_0^i), \text{logit}({}_{45}q_{15}^i))$  is a multivariate vector that corresponds to an empirical life table  $i$  in our life table database. We chose Mahalanobis distance over Euclidean distance due to the fact that  ${}_5q_0$  and  ${}_{45}q_{15}$  are highly correlated in logit space (the correlation coefficients are 0.58 and 0.87 for males and females, respectively), and Mahalanobis distance takes the covariance matrix of  ${}_5q_0$  and  ${}_{45}q_{15}$  in logit scale into consideration when calculating the distance between any pair of life tables. We then keep the potentially most similar life tables as measured by the Mahalanobis distance. The number of life tables retained is based on the numbers of empirical life tables from the same country included in our database. For example, for developed countries with empirical life tables for every year, only the 10 most similar life tables and all life tables from the same country are kept for additional analysis.

In the second step, instead of obtaining a simple arithmetic mean of all selected life tables, we applied empirical weights to each selected life table and computed the weighted average. We examined all possible pairs of life tables of the same sex in our empirical database by country, GBD region, and GBD super-region. For each pair of life tables, we computed the sum of difference in  ${}_nq_x$  in logit space. We then obtained the mean of such values by sex, time difference in years of observation, and whether the pair of life tables are from the same country, same GBD region, or same GBD super-region. The reciprocal of the squared means were used as empirical weights. The figure below shows the empirical weights by lag in time and geographic region for males. This process gives more weight to life tables closer in terms of time and geographic location.

**Figure: Empirical weights by lag in time and geographic region for males.**

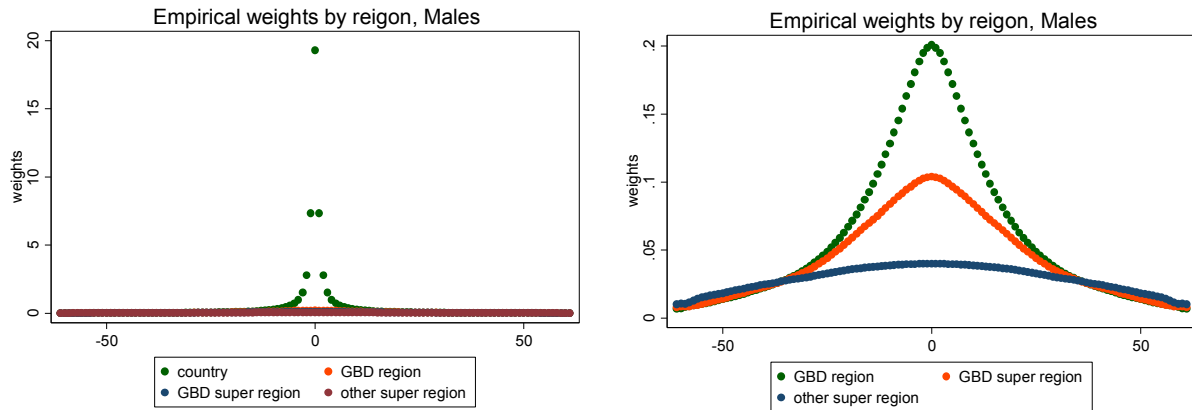

The counterfactual life table,  $c$ , or the final life table,  $p$ , when HIV/AIDS is non-existent in the population, is estimated using a standard life table,  $s$ , which is generated using the aforementioned procedure and coefficients  $\hat{\beta}_x^{1,s}$  and  $\hat{\beta}_x^{2,s}$  as shown in the model life table coefficients table.

### 3.3.B. Introducing AIDS

Currently, perhaps the most challenging issue for all existing model life table systems is providing plausible age specific mortality estimates given an HIV/AIDS epidemic. Both widely used model life table systems, the Coale-Demeny model life tables and the Modified Logit Life Table system, are largely based on empirical life tables from the pre-HIV era. In addition, they do not provide an integrated solution to the problem of incorporating HIV/AIDS.

In GBD 2013 and GBD 2015, we apply a two-step process where we first estimate HIV/AIDS counterfactual age pattern of mortality first using the method described in step 3.3A with HIV counterfactual 5q0 and 45q15 as entry parameters, and then in the second step add excess mortality due to HIV/AIDS in summary age group of under-5 and age 15 to 59 to HIV free age specific mortality estimated from step 1. HIV counterfactual 5q0 and 45q15 are estimated using the first stages models employed in the Gaussian Process Regressions for 5q0 and 45q15 discussed in sections 1 and 2.

For GBD 2013 and GBD 2015, we apply an innovative way of adding excess mortality due to HIV to specific age groups by the type of the HIV/AIDS epidemic: concentrated or generalized. In this step, we take all available vital registration data with ICD10 coded causes of death. Then by sex, and type of epidemic, we run Seemingly Unrelated Regression (SUR) on the relative mortality risk due to HIV using constant only as shown in the equation below. The relative risks here are defined as the ratio HIV specific mortality in a specific age group and age group 40-44.

$$R_i = \alpha_i + \xi_i$$

Where  $i$  indicates different age groups 0, 1-4, 4-9, 10-14, etc.

$$R_i = \frac{{}_nM_x^{HIV}}{{}_5M_{40}^{HIV}}$$

We then repeatedly re-sample from the variance and covariance matrix of the estimated constants and residuals to get the mean and 95% uncertainty intervals of estimated relative risks by sex, age and types of epidemic. The figure below shows the relative risks for generalized epidemic.

**Figure: Relative risks for generalized epidemic**

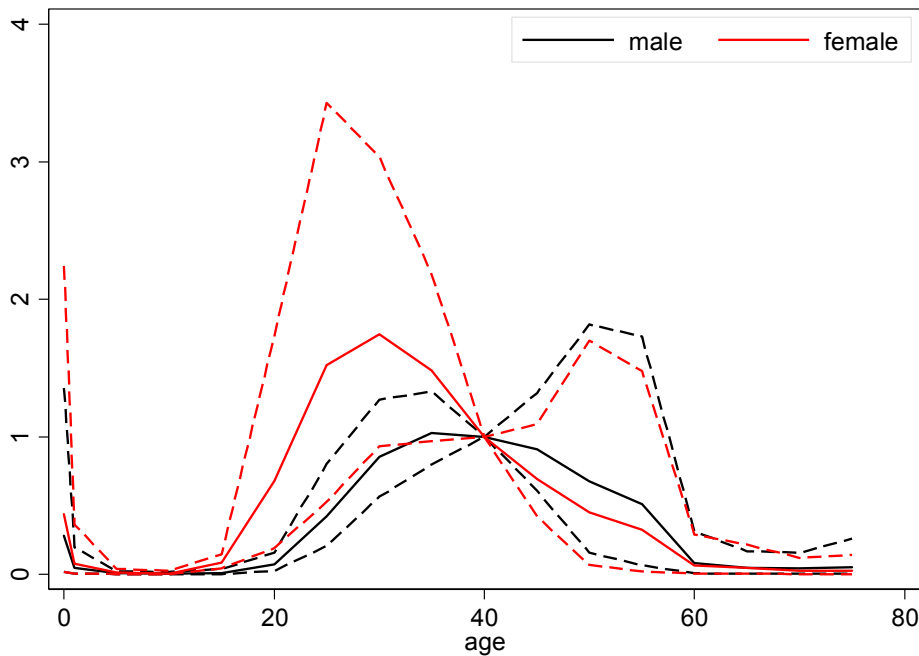

### 3.3.E. Uncertainty in the estimated life tables

One important attribute of this study is the inclusion of uncertainty in every single step of the GBD mortality estimation process. We have integrated uncertainty from the entry parameters ( ${}_{5}q_0$  and  ${}_{45}q_{15}$ ) and the coefficients of each model discussed in this section based on the method illustrated by King et al.<sup>28</sup> Essentially, the model life table process described above is repeated 1,000 times based on randomly paired entry parameters (thus different standard life tables) and model coefficients. As a result of this process, in countries where uncertainties in estimated entry parameters are high, we can have wide uncertainty intervals in the estimated deaths, which is the final product of the GBD mortality process.

### 3.4 Rake subnational life tables to national level (excluding South Africa)

Since data is scarcer for subnational units than it is at the national level in most countries, estimates of subnational mortality require adjustment to be consistent with national estimates. To generate consistent time series estimates of all-cause mortality including mortality rates and death numbers, we raked subnational-level estimates to separately-estimated national level estimates. For the mortality envelope, we applied a national scalar such that the sum of the subnational location mortality envelopes matched the mortality envelope separately estimated for the national level.

The only exception to this subnational-to-national raking process is South Africa, where we aggregate subnational level estimates as our national level estimates. Based on our observation in previous iterations of GBD, the high level of heterogeneity in the HIV/AIDS epidemic at the subnational level in South Africa introduced a challenge to accurate estimation of both all-cause and HIV cause-specific mortality in South Africa at the national level. Since our EPP-Spectrum model (described in the HIV/AIDS modelling process in Part 3) generated estimates at the province level for South Africa, we produced province-level all-cause mortality estimates using all available subnational sources of child and adult mortality rates and aggregated province-level results as our final national-level estimates for South Africa. The number of data sources were found to be comparable at the national and provincial levels.

## Section 4. HIV/AIDS estimation

### Input data

The section on HIV/AIDS modeling in Part 3 of this appendix contains details on the input data used for estimating HIV/AIDS.

#### 4.1 Age-specific mortality (with and without HIV)

The with-HIV and without-HIV age-specific mortality rates that are inputs to the HIV/AIDS estimation are part of the model life table process described in section 3.

#### 4.2 HIV-free mortality rate

The age-specific mean HIV-free mortality rates produced by the model life table process are used as inputs to the on/off ART survival process described in the HIV modeling section in Part 3 of this appendix.

#### 4.3 HIV-free survival rates (for Spectrum)

The age-specific HIV-free survival probabilities from the model life table process were used to create inputs for Spectrum. However, because the model life table process produces 5-year age group estimates and Spectrum models in single-year age bins, we interpolated 5-year age group survival into single-year age group survival. Life tables generally include a variable called  $l_x$ , which represents a synthetic cohort, aged through the mortality observed in the table. At age 0, 100,000 people may be alive, and at each age group, the probability of survival is applied to the number who survive the previous age group. In order to interpolate single-year survival, we fit a spline to the 5-year  $l_x$  values to interpolate single-year  $l_x$  values. Then, we back-calculated the single-year probabilities of survival. This method was considered better than assuming constant probability of survival for each year in a 5-year age group and generated smoother single-year estimates. These single-year probabilities of HIV-free survival were then used as inputs to Spectrum.

#### 4.4 On- and off-ART mortality estimation process and CD4 progression parameters for off-ART

Detailed descriptions of the data and process related to on- and off-ART mortality estimation and CD4 progression parameters can be found in the HIV/AIDS estimation write-up in Part 3 of this appendix.

#### 4.5 EPP and Spectrum

For the GBD analysis of HIV, we used variants of two tools developed by UNAIDS: a) the estimates and projections package (EPP) which is meant to generate a time series estimate of HIV incidence consistent with observed prevalence data in ages 15-49 and b) the Spectrum natural history model that uses an estimated time series of HIV incidence, demographic inputs including HIV-free mortality and population, assumptions about CD4 progression rates, and assumptions about on and off ART HIV death rates by age, sex, and CD4 rate to predict incidence, prevalence, and death by age, sex, and year. We modified both tools for use in the GBD. Additional detailed information about EPP and Spectrum can be found in the HIV/AIDS estimation write-up in Part 3 of this appendix.

#### 4.6 HIV/Mortality Reckoning

The Reckoning process is intended as a method of reconciling separate estimates of HIV mortality (and its resulting effect on estimates of HIV-free and all-cause mortality) due to two separate estimation processes within the GBD all-cause and HIV estimation framework: those from the model life table system as a way to capture the impact of HIV on age pattern of all-cause mortality, and the those from the natural history model of EPP-Spectrum as used by GBD and UNAIDS. In addition, we also utilize space-time GPR smoothed VR data on HIV specific mortality for countries with good quality VR instead of using mortality estimates from Spectrum based on back-calculated incidence using case report data.

As part of the HIV/AIDS estimation process, all GBD 2015 locations were assigned to a modeling strategy group, depending on the level of HIV within the country and the availability and quality of HIV and VR data. Groups were used to determine which sources to use for HIV-specific mortality data and how to calculate final estimates of HIV and all-cause mortality.

Group 1 includes much of Sub-Saharan Africa and other locations where HIV prevalence survey data is available to generate incidence curves using EPP. In Group 1 locations, demographic assessments depend substantially on the sibling history data analysis which have large uncertainty intervals and for which there may be local variation in biases in sibling history responses. All Group 1 locations except for India are classified as Group 1A, while India and its states are classified as Group 1B, where we maintained more influence from the SRS system used in all-cause mortality estimation.



**Table: Group 1 Locations**

|                     |                    |               |                  |           |
|---------------------|--------------------|---------------|------------------|-----------|
| Angola              | DR Congo           | Guinea Bissau | Niger            | Swaziland |
| Benin               | Djibouti           | Haiti         | Nigeria          | Tanzania  |
| Botswana            | Dominican Republic | India (2B)    | Papua New Guinea | Togo      |
| Burkina Faso        | Equatorial Guinea  | Kenya         | Rep of the Congo | Uganda    |
| Burundi             | Eritrea            | Lesotho       | Rwanda           | Zambia    |
| Cameroon            | Ethiopia           | Liberia       | Senegal          | Zimbabwe  |
| Cape Verde          | Gabon              | Malawi        | Sierra Leone     |           |
| Central African Rep | Gambia             | Mali          | Somalia          |           |
| Chad                | Ghana              | Mozambique    | South Africa     |           |
| Cote D'Ivoire       | Guinea             | Namibia       | South Sudan      |           |

Group 2A locations have at least 25 years of complete vital registration since 1980, as assessed by GBD's VR completeness synthesis method described in section 2.3. Since these locations have high-quality vital registration data, all-cause mortality estimates are largely driven by national data and the vital registration system is a robust source of data for HIV deaths.

**Table: Group 2A Locations**

|                     |                |            |                                |                          |
|---------------------|----------------|------------|--------------------------------|--------------------------|
| Antigua and Barbuda | Croatia        | Ireland    | Mexico                         | Slovenia                 |
| Argentina           | Cuba           | Israel     | Moldova                        | Spain                    |
| Australia           | Czech Republic | Italy      | Netherlands                    | South Korea              |
| Austria             | Denmark        | Japan      | Philippines                    | Sweden                   |
| Barbados            | Estonia        | Kazakhstan | Poland                         | Switzerland              |
| Belgium             | Finland        | Kuwait     | Portugal                       | Trinidad and Tobago      |
| Bermuda             | France         | Latvia     | Puerto Rico                    | Ukraine                  |
| Bulgaria            | Germany        | Lithuania  | Romania                        | United Kingdom           |
| Canada              | Greece         | Luxembourg | Russia                         | United States of America |
| Chile               | Guatemala      | Macao      | Saint Lucia                    | Uruguay                  |
| Colombia            | Hong Kong      | Malta      | St. Vincent and the Grenadines | Venezuela                |
| Costa Rica          | Hungary        | Mauritius  | Singapore                      |                          |

Remaining locations with any VR make up Group 2B, and locations without any VR data are Group 2C. Exceptions were made for Madagascar, which was reclassified from Group 2B to 2C due to data quality concerns, and Cambodia, which was treated as a group 2B instead of 2C because of its available HIV prevalence data from the 2005 DHS survey (see the HIV/AIDS modeling write-up in Part 3 for more details). All subnational locations were classified according to the national-level group.

**Table: Group 2B Locations**

|                        |               |            |                       |                 |
|------------------------|---------------|------------|-----------------------|-----------------|
| Albania                | Cambodia      | Honduras   | Nicaragua             | Sri Lanka       |
| Algeria                | China         | Iran       | Northern Mariana Isl  | Suriname        |
| American Samoa         | Cyprus        | Iraq       | Oman                  | Syria           |
| Armenia                | Dominica      | Jamaica    | Palestine             | Taiwan          |
| Azerbaijan             | Ecuador       | Jordan     | Panama                | Tajikistan      |
| Bahamas                | Egypt         | Kiribati   | Paraguay              | Thailand        |
| Bahrain                | El Salvador   | Kyrgyzstan | Peru                  | Tonga           |
| Belarus                | Fiji          | Malaysia   | Qatar                 | Tunisia         |
| Belize                 | FYR Macedonia | Maldives   | Sao Tome and Principe | Turkey          |
| Bolivia                | Georgia       | Mongolia   | Saudi Arabia          | Turkmenistan    |
| Bosnia and Herzegovina | Greenland     | Montenegro | Serbia                | U.S. Virgin Isl |
| Brazil                 | Guam          | Morocco    | Seychelles            | Uzbekistan      |
| Brunei                 | Guyana        | Myanmar    | Slovakia              |                 |

**Table: Group 2C Locations**

|                                |                  |                 |                      |
|--------------------------------|------------------|-----------------|----------------------|
| Afghanistan                    | Indonesia        | Mauritania      | Timor-Leste          |
| Andorra                        | Laos             | Nepal           | United Arab Emirates |
| Bangladesh                     | Lebanon          | North Korea     | Vanuatu              |
| Bhutan                         | Libya            | Pakistan        | Vietnam              |
| Comoros                        | Madagascar       | Samoa           | Yemen                |
| Federated States of Micronesia | Marshall Islands | Solomon Islands |                      |

For HIV mortality data, Group 2A locations used mortality output from the ST-GPR process due to the high quality of their vital registration systems. Group 1A and 1B locations used Spectrum output, while Group 2B and 2C locations used output from cohort incidence bias adjusted (CIBA) deaths due to HIV/AIDS from the Spectrum model (for more information, see the HIV/AIDS modeling write-up in Part 3 of this appendix).

Outputs were modeled to include an under-1 age group without the early-, late-, and post-neonatal groups. To attribute under-1 deaths from Spectrum to these neonatal groups, we make the assumption that all HIV deaths that occur in the first year of a child's life occur in the post-neonatal stage (after 28 days), since the literature on HIV in these age groups is still unclear but seems to indicate higher mortality in the post-neonatal stage, and there is no clear evidence to guide alternative methods of age-splitting under-1 deaths due to HIV.<sup>29,30</sup>

### Envelope Calculation

In general, the all-cause and HIV-deleted envelopes were generated by synthesizing the results from the with-HIV and HIV-free life tables, along with selected HIV mortality from ST-GPR, Spectrum output, or

cohort incidence bias adjusted Spectrum output (CIBA-Spectrum). We used with-HIV and HIV-free lifetables in order to ascertain the implied HIV from the model life table system.

For age groups under age 5, we used the under-5 results from the age-sex process described in section 1. In Group 1A and 1B locations, we generated a scalar based on Spectrum results of HIV-specific and non-HIV deaths to generate HIV-deleted envelope deaths based on the all-cause results from the envelope. In other locations, we directly subtracted mortality from ST-GPR or Spectrum, after capping HIV at 90% of the all-cause envelope, to generate the HIV-deleted envelope. As mentioned previously, we made the assumption that all under-1 HIV-specific deaths occur in the post-neonatal stage.

In all groups except Group 1A, for all ages above 5 and under 15, we subtracted mortality from Spectrum or ST-GPR directly from the all-cause with-HIV envelope, after capping HIV at 90% of the all-cause envelope. In Group 1A, we took the HIV-free mortality and add mortality from Spectrum directly to generate the all-cause with-HIV envelope.

For ages above 15 and below 80, we applied separate approaches for Group 1A and 1B locations compared to Group 2A, 2B, and 2C locations. Group 1A and 1B locations used HIV mortality determined by an ensemble model where we averaged the implied HIV mortality from the model life table process and the HIV mortality output by Spectrum, which are intrinsically linked by the draw-level HIV-free mortality age pattern. Group 2A, 2B, and 2C locations used HIV mortality directly from ST-GPR and CIBA-Spectrum. For all locations except Group 1A, we subtracted the calculated HIV mortality from the all-cause envelope to generate HIV-deleted envelope deaths. In Group 1A, we added the HIV mortality to HIV-free mortality from the MLT process to calculate all-cause mortality, thus effectively allowing all-cause mortality from the demographic estimation process to be changed based on our ensemble HIV estimates. This reflects our view about the inherent uncertainty in all-cause mortality estimates largely based on sibling survival data in Group 1A locations and the various assumptions on mortality and program data required in both EPP and Spectrum.

For the age group 80 and above, we first approximated the over-80 mortality rate by using our lifetable output and divided  $l_x$  by  $T_x$  from the age 80-84 values in the country-specific lifetables. We then calculated a scalar from the approximated all-cause mortality rate from the lifetable to the all-cause mortality rate by taking the envelope deaths/populations. We applied this scalar to both the with-HIV and HIV-free lifetables to rescale these numbers and the implied HIV death rate to the envelope space. Finally, HIV-deleted and all-cause mortality were determined by the same approaches as used for other ages above 15.

## Lifetable Calculation

Generally, lifetables were calculated using a consistent approach to those used in calculating the envelope. There are, however, a few differences in calculation, particularly related to sex and location aggregation.

First, for the granular age groups above 80, which are contained in the life tables but not the all-cause envelope, we used the ratio of all-cause deaths to HIV-deleted deaths in the 80+ group in the envelope process, and applied this to the lifetable results. For Group 1A locations, we took the HIV-free lifetable results and multiplied by the ratio to obtain all-cause lifetable results. In all other locations, we took the

all-cause lifetable and divided by the ratio to obtain the HIV-free lifetable results, consistent with their handling in the envelope process.

For aggregate locations, we generated aggregated mx and ax values by weighting mx by population and ax by deaths (here, calculated by  $mx * population$ ). From this, we population- and death-weighted regional mx and ax values, which we used to generate region-level lifetables.

In the under-5 age groups, we applied a similar approach to calculating the envelope. However, when aggregating the all-cause lifetable for countries with subnational locations, we substituted the national-level under-5 results instead of using the aggregated mx and ax values from the subnational units. We did this in all aggregate countries except South Africa, where we aggregated the national results from subnational results, consistent with our approach in 5q0, 45q15, and the model life tables. We substituted in the under-5 national aggregates because we want to preserve the estimated 5q0 results from our 5q0 data synthesis and age/sex splitting modeling processes, which are not necessarily equivalent to those generated by the aggregated mx and ax values from the model life table process. For HIV-deleted lifetables, we aggregated subnational units using the regular weighting scheme.

To generate lifetables for both sexes combined, we used the populations available through the highest age group possible to weight the male and female mx and ax values, using the population of the highest age group for all further age groups when we did not have population data throughout the ages contained in the lifetable. For instance, if a country only had ages through age 80+ for a given year, we would use the 80+ populations to weight mx and ax for ages 80-85, 85-90, and onwards. For aggregating to regional aggregates, given the heterogeneity of population data across countries, we chose to use the 80+ populations to weight mx and ax.

#### 4.7 HIV crude death rates for under-5 and ages 15-59

As a result of the envelope and lifetable calculation steps, the Reckoning produces final HIV death rates, based on the results of the Envelope Calculation portion of the Reckoning process.

## Section 5. Age-specific mortality estimation for all GBD age-groups: with and without HIV

### 5.1 Age-specific mortality without discontinuities (with HIV/AIDS)

Age-specific mortality rates without fatal discontinuities were generated using the model life table system (section 3), age-sex model (section 1.13), and HIV reckoning process (section 4.6) depending on the location groups detailed in section 4.6 and in Appendix Table 1.

For mortality rates in age groups younger than age 5, age specific mortality was taken from our age-sex model that split U5MR into mortality for age groups enn, Inn, pnn and ages 1-4. For Group 1B, 2A, 2B, and 2C locations, age-specific mortality rates in ages 5 and older were generated using the GBD model life table system described in section 3. For Group 1A locations, age specific mortality with HIV was produced as the sum of HIV free mortality rates generated in the first step of the model life table system described in section 3 and the results of the ensemble model for HIV-specific mortality described in section 4.6.

## 5.2 HIV-deleted age-specific mortality

HIV-deleted age-specific mortality was used in cause of death analyses (CodCorrect) in GBD 2015 to avoid the spill-over effect of HIV mortality into other causes, particularly for locations affected by high HIV burden. We used the difference between the age-specific mortality with HIV, without fatal discontinuities as described in section 5.1 and the HIV-specific mortality as a result of the HIV reckoning process described in section 4.6.

## 5.3 Add fatal discontinuities

In our mortality estimation process, we excluded data from years with fatal discontinuities to ensure that these sudden idiosyncratic increases in mortality would not affect long-term trends in mortality for a given country. Part 3 of this appendix describes the process by which we identify fatal discontinuities, the data sources we used, the method by which we split the deaths according to age and sex, and how we made draws to create uncertainty for these estimates. This section details how we added the deaths due to fatal discontinuities to the all-cause mortality envelope and life tables.

To incorporate deaths due to fatal discontinuities into the mortality envelope, 1,000 draws of deaths due to fatal discontinuities were added pairwise to 1,000 draws of the with-HIV mortality envelope for each location, sex, and age group. Ninety-five percent uncertainty intervals were calculated as in other processes, taking the 97.5% and 2.5% quantiles of the summed draws.

To incorporate fatal discontinuity deaths into the life table, we created a ratio of deaths with fatal discontinuities to deaths without fatal discontinuities and applied the ratio as a scalar to the without-fatal-discontinuity mortality rate ( ${}_n m_x$ ) produced in the HIV Reckoning step, discussed in section 4.6. For under 1 age groups, we have scalars for early neonatal (enn), late neonatal (lnn) and post neonatal (pnn) ages. In order to calculate the probability of death for the under 1 age group ( ${}_1 q_0$ ), we pulled results from the under-5 age and sex pattern of mortality process (section 1.13), calculated with-fatal discontinuity  $m_x$  for enn, lnn, and pnn, back-calculated  $q_x$  for enn, lnn, and pnn, and then aggregated to  ${}_1 q_0$  using the equations in section 1.13. In addition to the granular under-1 age groups, we also used the  ${}_4 q_1$  generated by the age-sex model. Because we only had mortality and fatal discontinuity death numbers for the aggregate age group 80+, we applied the scalars for this group to the granular age groups of the life table up to 100 in order to calculate the life table with fatal discontinuities for older age groups.

## 5.4 Age-specific deaths with discontinuities and HIV/AIDS

From the process described in section 5.3, we produced location-, sex-, year-, and age- specific death numbers including fatal discontinuities.

## 5.5 Life tables with HIV/AIDS and fatal discontinuities

From the process described in section 5.4, we produced location-, sex-, and year-specific child mortality (5q0), adult mortality (45q15), and life expectancy at birth and age 50. Additionally, we produced pred-ex, an input to the DALYnator, described in Part 4 of this appendix. Pred-ex compares the age of death of those who die in each age group to the life expectancy observed in the standard life table in order to calculate YLLs.

### References

- 1 Rajaratnam JK, Tran LN, Lopez AD, Murray CJL. Measuring under-five mortality: validation of new low-cost methods. *PLoS Med* 2010; **7**: e1000253.
- 2 Wang H, Dwyer-Lindgren L, Lofgren KT, *et al.* Age-specific and sex-specific mortality in 187 countries, 1970-2010: a systematic analysis for the Global Burden of Disease Study 2010. *Lancet* 2012; **380**: 2071–94.
- 3 Hill K. Estimating census and death registration completeness. *Asian Pac Popul Forum* 1987; **1**: 8–13, 23–4.
- 4 Wang H, Liddell CA, Coates MM, *et al.* Global, regional, and national levels of neonatal, infant, and under-5 mortality during 1990-2013: a systematic analysis for the Global Burden of Disease Study 2013. *Lancet* 2014; **384**: 957–79.
- 5 Gelman A, Carlin JB, Stern HS, Rubin DB. *Bayesian Data Analysis, Second Edition*. CRC Press, 2003.
- 6 Klein LR. *A Textbook of Econometrics*. Evanst: Row, 1974.
- 7 Lozano R, Wang H, Foreman KJ, *et al.* Progress towards Millennium Development Goals 4 and 5 on maternal and child mortality: an updated systematic analysis. *The Lancet* 2011; **378**: 1139–65.
- 8 Kerber KJ, Lawn JE, Johnson LF, *et al.* South African child deaths 1990-2011: have HIV services reversed the trend enough to meet Millennium Development Goal 4?. [Miscellaneous Article]. *AIDS October 23, 2013* 2013; **27**: 2637–48.
- 9 Marston M, Becquet R, Zaba B, *et al.* Net survival of perinatally and postnatally HIV-infected children: a pooled analysis of individual data from sub-Saharan Africa. *Int J Epidemiol* 2011; **40**: 385–96.
- 10 Hill K. Estimating census and death registration completeness. *Asian Pac Popul Forum* 1987; **1**: 8–13, 23–4.
- 11 Bennett NG, Horiuchi S. Estimating the completeness of death registration in a closed population. *Population Index* 1981; **47**: 207–21.
- 12 Brass W, Coale AJ. *Methods of Analysis and Estimation*. In: Brass W, ed. *The Demography of Tropical Africa*. Princeton: Princeton University Press, 1968.

- 13 Preston S, Coale AJ, Trussell J, Weinstein M. Estimating the completeness of reporting of adult deaths in populations that are approximately stable. *Popul Index* 1980; **46**: 179–202.
- 14 Preston S, Hill K. Estimating the completeness of death registration. *Population Studies* 1980; **34**: 349–66.
- 15 Murray CJL, Rajaratnam JK, Marcus J, Laakso T, Lopez AD. What can we conclude from death registration? Improved methods for evaluating completeness. *PLoS Med* 2010; **7**: e1000262.
- 16 Obermeyer Z, Rajaratnam JK, Park CH, *et al.* Measuring Adult Mortality Using Sibling Survival: A New Analytical Method and New Results for 44 Countries, 1974–2006. *PLOS Med* 2010; **7**: e1000260.
- 17 Gakidou E, King G. Death by survey: estimating adult mortality without selection bias from sibling survival data. *Demography* 2006; **43**: 569–85.
- 18 Masquelier B. Adult Mortality From Sibling Survival Data: A Reappraisal of Selection Biases. *Demography* 2012; **50**: 207–28.
- 19 Rogers RG, Crimmins EM, editors. Adult Mortality in Africa. In: International Handbook of Adult Mortality, 2011 edition. Dordrecht Netherlands ; New York: Springer, 2011: 151–70.
- 20 Lozano R, Wang H, Foreman KJ, *et al.* Progress towards Millennium Development Goals 4 and 5 on maternal and child mortality: an updated systematic analysis. *The Lancet* 2011; **378**: 1139–65.
- 21 Schnuelle P, Lorenz D, Trede M, Van Der Woude FJ. Impact of renal cadaveric transplantation on survival in end-stage renal failure: evidence for reduced mortality risk compared with hemodialysis during long-term follow-up. *J Am Soc Nephrol* 1998; **9**: 2135–41.
- 22 Murray CJL, Ferguson BD, Lopez AD, Guillot M, Salomon JA, Ahmad O. Modified logit life table system: Principles, empirical validation, and application. *Population Studies* 2003; **57**: 165–82.
- 23 Human Mortality Database. Berkeley, USA: University of California; Rostock, Germany: Max Planck Institute for Demographic Research. <http://www.mortality.org/> (accessed April 11, 2011).
- 24 Murray CJL, Rajaratnam JK, Marcus J, Laakso T, Lopez AD. What can we conclude from death registration? Improved methods for evaluating completeness. *PLoS Med* 2010; **7**: e1000262.
- 25 Wang H, Liddell CA, Coates MM, *et al.* Global, regional, and national levels of neonatal, infant, and under-5 mortality during 1990–2013: a systematic analysis for the Global Burden of Disease Study 2013. *Lancet* 2014; **384**: 957–79.
- 26 Gompertz B. On one uniform law of mortality from birth to extreme old age, and on the law of sickness. *Journal of the Institute of Actuaries and Assurance Magazine* 1871; **16**: 329–44.
- 27 Thatcher AR. The long-term pattern of adult mortality and the highest attained age. *Journal of the Royal Statistical Society: Series A (Statistics in Society)* 1999; **162**: 5–43.
- 28 King G, Tomz M, Wittenberg J. Making the most of statistical analyses: improving interpretation and presentation. *American Journal of Political Science* 2000; **44**: 347–61.

- 29 Brocklehurst P, French R. The association between maternal HIV infection and perinatal outcome: a systematic review of the literature and meta-analysis. *BJOG: An International Journal of Obstetrics and Gynaecology* 1998; **105**: 836–48.
- 30 Kim H-Y, Kasonde P, Mwiya M, *et al.* Pregnancy loss and role of infant HIV status on perinatal mortality among HIV-infected women. *BMC Pediatrics* 2012; **12**: 138.



## Part 2: Cause of death database

### Background

Figures 2A and 2B show the high-level view of data inputs, analytical steps, and outputs of the cause of death analysis frame. The complexity of the overall process can be usefully divided into three broad phases: data inputs on the event of death going into the cause of death database that are analyzed using CODEm; data inputs on precursors to death that are modeled through a variety of strategies; and the integration of these streams of analysis into a single set of cause of death estimates by age, sex, year, and geography with uncertainty through the CodCorrect algorithm. The process for cancer and for HIV/AIDS is somewhat different, and described in more detail in Part 3.

### Cause of death data identification

#### 0.1 Overview of data types

The cause of death database contains six types of data sources: vital registration, verbal autopsy, cancer registry, police records, sibling history, surveillance, and survey/census. The highest-quality data will have detailed characteristics of each demographic group and detailed causes of death across the time series. Countries with complete vital registration systems are considered to be high-quality. For countries with incomplete vital registration systems, vital statistics for causes of death can be supplemented with other data types to provide cause-specific estimates.

#### 0.2 ICD detail

A majority of the cause of death data is vital registration data obtained from either the WHO Mortality Database, country-specific mortality databases operated by official offices, provided by trusted country collaborators. It is considered to be the highest-quality data, as it is the most comprehensive. Each cause is coded directly to the most detailed cause of death when possible, whereas cause codes in ICD tabulated data are coded to aggregated cause groups. The cause of death database contains 8,044 location-years of detailed data from 1980 to 2014, which includes underlying causes of deaths coded with 3-5 digit se codes, by country, year, sex, and age groups. Detail causes are coded to one of the following ICD detail coding systems: ICD8, ICD9, or ICD10. Each coding system has a similar cause hierarchy and cause list that has continually developed over time. ICD10 is the current standard and most exhaustive cause list. Within the cause lists 5-digit codes are truncated to 4-digit codes to condense the cause lists. Updates to ICD detail occur biannually as WHO releases new versions or as country collaborators provide additional data. Updates to data from WHO increasingly include ICD10 cause of death data, as it is the most current classification of cause of death, while updates to ICD8 and ICD9 detailed lists are less common. In the case of overlapping data, preference is given to data from pre-determined country collaborators, which is updated annually.

#### 0.3 ICD tabulations lists

The ICD tabulation lists include the ICD8 List A (ICD8A), ICD9 Basic Tabulation List (BTL), ICD10 Mortality Tabulation, Russia Tabulation list, and India Medical Certification of Cause of Death (MCCD). These data sources make up 2,664 location-years from 1980 to 2014 in the cause of death database. All are condensed versions of the ICD9 and ICD10 detail lists, with some differences in the format of cause lists depending on the data source. ICD8A, ICD9 BTL, and ICD10 Mortality Tabulation cause of death are assigned to subtotal groups, referred to as chapters, and cause groups respective to ICD detail groups. Additionally ICD9 BTL includes ICD9 detail codes for some cancers and a custom tabulation scheme for

the former USSR countries. The Russia Tabulation lists and India MCCD cause lists each have custom nomenclatures based on ICD detail cause codes.

Two of the drawbacks in data using tabulation lists are discrepancies in the accuracy of death counts and lack of detail due to aggregated cause groups. There are instances where the sum of deaths in chapter subtotals are not equal to the sum of cause groups within the chapter. To account for any missing or duplicate deaths reported within the cause groupings, death counts are systematically adjusted, by calculating the differences between subtotals and sub-causes within the cause groups. Any differences are assigned to a remainder cause group. To account for the lack of cause code detail, select cause groups are disaggregated (Step 1.1) to create a complete cause list. Updates to ICD Tabulation lists obtained from WHO occur less frequently compared to ICD detailed lists, as more countries are reporting deaths in ICD detail. In instances of overlapping data, preference is given first to data from country collaborators' data from WHO, then preference to ICD detail data from WHO, before choosing to use ICD tabulation lists.

#### China DSP/ China CDC

The two primary sources of data for China are surveillance data from the China Disease Surveillance Points (DSP) system and vital registration collected by the Chinese Center for Disease Control and Prevention (CDC). In the China DSP data, deaths were reported across 145 disease surveillance points used from 1991 to 2003, and 161 points used from 2004 to 2007. While China DSP with ICD10 code is considered surveillance data, it provides national coverage and cause detail. Thus it receives similar processing and treatments to the China CDC vital registration from 2008 to 2012. From 2008 to 2012, all of the deaths and cause of death information from the Disease Surveillance Points system and other system points throughout China were collected and reported via the Mortality Registration and Reporting System, an online reporting system of the Chinese CDC. The deaths in these data are reported at the strata level, a metric that is specific to China. Counties are stratified by urban and rural classification, but definitions of urbanity vary across counties. In Step 7.1 we use a method developed to scale up deaths from strata level to the province level.

#### India CRS

The India Civil Registration System (CRS) is a continuous systematic recording of deaths and births. We consider these data to be similar to vital registration as the coverage is national. Usable cause-specific death data are in the form of a custom cause list and exist between 1983 and 1995, with 1983-1984 and 1986-1987 including deaths data specific to rural or urban locations. Due to the lack of complete India subnational locations we state-split the data after age-sex splitting to fill in data gaps (Step 1.2). Though this system is continuous we have not found any cause-specific data past 1995. The more recent years of the report only include data for all-cause mortality.

#### India MCCD

The India Medical Certification of Cause of Death (MCCD) is the largest data source we have for India, with nationally representative data in a majority of the urban states and also union territories beginning in 1980. Deaths reported in this data source have been medically certified and are considered vital registration. The causes of death are reported in a tabulation list with a unique numbering scheme that conform to ICD9 and ICD10 detail codes, which must be disaggregated. Similar to the CRS, MCCD is state-split to fill in data gaps (Step 1.2 State Splitting); however, in these data state splitting occurs prior to age-sex splitting.

## 0.4 Verbal autopsy

### VA coded to ICD 10 and VA coded to other lists

In countries without vital registration systems, verbal autopsy studies are a viable data source to inform cause of death. Data are obtained by trained interviewers who use a standardized questionnaire to ask relatives about the signs, symptoms, and demographic characteristics of recently deceased family members. Based on the answers to the questionnaires a cause of death is assigned.

Verbal autopsy data are highly heterogeneous: studies use different instruments, different cause lists from single causes to full ICD cause lists, different methods for assigning cause of death based on a completed verbal autopsy, different recall periods, and different age groups, quite apart from cultural differences in the interpretation of specific questions. The validity of cause of death must be considered when mapping to a GBD cause. Verbal autopsies are likely accurate in assigning cause of death to road injury or homicide, but less accurate for causes requiring medical certification, such as cardiovascular causes. Studies can also occur once in a particular country or as part of an extended network, such as INDEPTH. INDEPTH is a continuous surveillance source with several Demographic Surveillance Systems sites that collect data which is coded to ICD detail causes.

### INTERVA modeled VA

In previous years, INTERVA modeled VA was excluded from our analysis. Verbal autopsies used in our analysis are non-INTERVA, as they use questionnaires and modules consistent with WHO standards. The Population Health Metrics Research Consortium (PHMRC) published a study that shows results of INTERVA-modeled VA are not compelling enough to be credible, thus we have decided to exclude data for all causes due to low validations with the exception of injuries in Sub-Saharan Africa.<sup>1</sup> We lack data in sub-Saharan Africa and use INTERVA to fill in gaps and stabilize injuries patterns.

### India SCD and SRS

Deaths reported in verbal autopsy studies in rural Indian states can be accounted for in the Survey of Causes of Death (SCD) from 1980 to 1994 and in the Sample Registration System (SRS) post-1998 in urban and rural states. Data in the SCD were collected through a verbal autopsy survey from a sample of villages. To expand our estimates to more states and causes we used methods of state splitting post-mapping to GBD causes (Step 1.2). Like the SCD, SRS also records deaths in a sample of villages but also includes urban blocks in its sample. This survey is collected by the Registrar-General of India, and since 1999 SRS has merged with SCD to provide ongoing coverage on both urban and rural areas.<sup>2</sup> The maternal data reported in SRS are given in MMR, which we convert to deaths by state and urbanity by using our estimates for the SRS population and neonatal mortality rates.

## 0.5 Other data types

### Maternal mortality data

In locations with low-quality vital registration or no vital registration, maternal mortality metrics can be found in surveillance, surveys, census, and sibling history data sources. The best data have death counts due to maternal causes and the total number of deaths for women within the reproductive ages of 10 to 54 (previously 15 to 49) by year. If a data source is missing these components, it is necessary to create a complete cause list using live births and all-cause mortality deaths (Step 1.4). Though death counts is the preferred metric, maternal mortality is often measured using maternal mortality ratio (MMR), which is

easily converted to deaths using live births. An additional adjustment that must be applied to the China Maternal and Child Surveillance data is scaling data from the strata to the province level (Step 7).

#### Surveys and censuses reporting fraction of deaths due to selected injuries

Surveys and censuses are often used in countries with less developed vital registration systems, or in countries with adequate vital registration these data source are supplementary. Much like the verbal autopsies, the validity of cause of death is a concern due to lack of medical certification at the time of death. For these data sources we keep only causes related to maternal mortality and injuries. The remaining causes are accounted for as a remainder of total deaths in the sample size.

#### Police records

In most countries, police and crime reports are an important source of information for some types of injury deaths, notably road injuries and interpersonal violence. Our police data comes from reports on road traffic and crime trends. The police reports used in this analysis were obtained from published studies, national agencies, and institutional surveys such as the UN Crime Trends survey and United Nations Office on Drugs and Crime Global study on Homicides. We can assess whether police reports were likely to be complete and cover the entire country if police trends are close to trends seen in vital registration. Data are excluded in instances where police data for road traffic injuries are significantly lower than our vital registration. The threshold for exclusion is less than 80% of the cause fraction of the road traffic injuries in vital registration. Police data that meet our inclusion criteria and provide complete coverage are uploaded to the database for injuries causes.

### 0.6 Population-based cancer registries

#### Cancer registries with incidence

Data on cancer incidence was sought from individual population based cancer registries as well as from databases that include multiple registries, for example “Cancer Incidence in Five Continents” (CI5) (NID 133224), NORDCAN (NID: 113386), or EUREG (114368). Cancer registries were identified through the membership list of the International Association of Cancer Registries (IACR), through the GBD collaborator network, or through the GHDx. Registries were excluded if they were not representative of the coverage population, if they did not contain incidence data tabulated by cancer site, if the data were limited to years prior to 1980, if the source did not provide details on the population covered, or if the list of cancer sites included was not comprehensive.

#### Cancer registries with incidence and high quality mortality

In addition to incidence, some high-quality cancer registries also report cancer mortality data. These data were also extracted and used as inputs into the mortality-to-incidence model.

### Step 1. Standardize input data

The input data to the Cause of death (CoD) database are received in various formats and must be standardized to run through central CoD machinery to then upload to the database. Raw data inputs come from data sources such as mortality databases, literature reviews, or reports. Usable data sources must have a clear sample size of the number of deaths in the population and exhaustive cause lists. The complexity of the cleaning process varies drastically across data sources. For vital registration micro-data with the location, age, sex, year, and ICD-coded cause of every death, very little effort is necessary to standardize it into a consistent structure. Other sources may require weeks of careful review to

accurately extract scans of hardcover cause of death reports into spreadsheets that can be transformed and standardized.

At this point, data are assigned source identifiers so that they can be linked to the Global Health Data Exchange (GHDx) and cited appropriately. Any aggregate age and sex categories are flagged for age-sex splitting. The methods of cause-of-death assignment and data collection are reviewed to determine which source type to assign; for example, we distinguish sibling history data from surveys with a verbal autopsy module. Only data at the most detailed level of the Global Burden of Disease location hierarchy are used. Documentation from the source is reviewed to determine if the population is representative of the location or only a subset of the population in that location. Data sources representing a subset of the population are flagged as non-representative; this flag is used by CODEm to increase the variance associated with such data points.

Finally, diagnostics are reviewed at this stage to avoid sending cleaning errors downstream. We review cause-specific deaths for each demographic group to ensure the data are reasonable. For example, it is unlikely that male breast cancer deaths are higher than female breast cancer or deaths from neonatal causes occur in age groups over one year. All deaths totals are compared with the sum of cause-specific deaths to ensure the observed deaths are accounted for and sample size is complete.

### 1.1 Disaggregation

Causes of death in tabulated vital registration data are condensed into aggregated groups, some of which can be mapped directly to GBD causes while other aggregated cause groups are not informative and cannot be mapped to GBD causes. To correct for this, aggregated causes were mapped and split onto multiple ICD9 and ICD10 detail causes, or targets, based on the ICD groupings within the aggregated causes. Both ICD9 and ICD10 detail codes serve as targets because they are the highest quality vital registration data and enabled the calculation of proportions used to split the aggregated cause data into detailed causes. The proportions of deaths from nearby countries within the super region were used to fill in data gaps as they were likely to have similar cause of death trends.

We determined the targets based on detail causes missing from the tabulated cause list. For example, in ICD9 BTL, the tabulated cause list includes a viral diseases group. In the hierarchy of causes, this group consists of measles, yellow fever, encephalitis, hepatitis, rabies, other infectious diseases, garbage code, and remainder of viral diseases. We did not consider this list to be an exhaustive list of viral diseases based on the range of ICD detail codes given in the ICD9 BTL documentation. To make the cause list exhaustive and inclusive of other viral diseases, we split the remainder of viral diseases group into: other meningitis, other infectious diseases, herpes, dengue, other neglected tropical diseases, and garbage code. After a list of targets was determined, the aggregated deaths were disaggregated to the target causes using ICD9 and ICD10 detail proportions generated at the super region level for the corresponding sex and age groups across all years in the time series. For example, in ICD9 detail data, 54.8% of deaths in males in Latin American and Caribbean within the target group for BTL Viral Diseases were designated “other meningitis”, so 54.8% of deaths in the tabulated group, “remainder of viral diseases”, were assigned to “other meningitis” for any country within that particular super region. For any cause and demographic group where we lacked ICD detail, global proportions were used.

## 1.2 State splitting

Two important sources for cause of death estimation in India are the Medical Certification of Causes of Death (MCCD) report, which reports medically certified deaths from health facilities in mostly urban areas<sup>3</sup>, and the Survey of Causes of Death (SCD), which collects information via verbal autopsy on about one-half of 1% of all rural deaths in India, based on populations living in about 1,300 primary health care centers spread throughout the country.<sup>4</sup> For both of these reports, data missingness impedes estimation of trends at the state level. We used a first-order, log-linear model of the four-way contingency table of deaths by sex, age, state, and year to estimate the missing state-years. We fit the model to all available data for MCCD and SCD separately for each cause, including state-specific all-age measurements and age-specific national measurements. From this, we produced estimates for each combination of sex, age, state, and year. We then used these estimates wherever the raw data did not include sex-, age-, state-specific death counts.

For MCCD, the model was fit separately for ICD10- and ICD9-based reports using the tabulated cause list present in the data. In the SCD report, the model was fit for each GBD cause in the data. As data from the SCD reports were relatively sparse, the pooling of like causes together led to an improved model fit.

## 1.3 Region-sex-cause to state-urbanicity-age-sex-cause algorithm

We also made use of the Special Survey of Deaths in 2001–2003 and 2004–2005, a representative, national and subnational verbal autopsy study under the Sample Registration System in India. Data for the top 10 causes of death were available by region and sex, but we require data by urban and rural state in India. To achieve this, we first split the regions into states in proportion to the number of GBD-estimated deaths in each state. We then determined the urbanicity of the resulting state-cause-deaths by applying the SRS distributions of urban and rural deaths by cause in India. We then used a relative-rate splitting algorithm that accounts for the population structure of urban and rural areas in the state. Finally, we applied the SRS all-India age distribution to the all-age urban-rural-state-data with a similar approach, accounting for the age-specific population structure of urban and rural areas in each state.

## 1.4 Calculate non-maternal deaths

In cases when maternal mortality metrics do not include both deaths due to maternal causes and deaths due to non-maternal causes for women of reproductive ages, live births and all-cause mortality estimates can be used to calculate deaths. Many studies report maternal deaths as the maternal mortality ratio (MMR). MMR is the number of maternal deaths per 100,000 live births and can be used to calculate deaths when it has been derived from primary data and not estimated. Maternal deaths were calculated using MMR and live births, if live births were missing we substituted live birth estimates and used the following equation:

$$\text{Maternal deaths} = (\text{MMR}/100,000) * \text{Live births}$$

If a study was non-representative we extracted sample size and live births from that study. After maternal deaths were calculated, we used the difference from all-cause mortality estimates to determine non-maternal deaths.

A more accurate and data inclusive method of calculating maternal and non-maternal deaths incorporates coverage and splits deaths for a range of years into individual years. If there were live births in the study we adjusted the coverage.

$$\text{Coverage} = \text{live births} / \text{GBD estimated live births}$$

After coverage was calculated, totals deaths were scaled to be more representative. This gives a more accurate death count since the envelope assumes representative coverage. Using all-cause mortality as an all-cause total, non-maternal deaths were subsequently calculated.

$$\text{Maternal envelope with coverage} = \text{maternal envelope} * \text{coverage}$$

An additional adjustment can be applied to maternal data spanning over a range of consecutive years, which allows for more data inclusion. The years within specified year ranges are separated into individual years and total deaths within the year range were split between each individual year using the fixed proportions of maternal deaths from vital registration in that particular country. We only used vital registration to inform the proportions because it was both high quality and representative.

## Step 2. Map to GBD cause list

In GBD 2015 we developed 411 maps to translate causes found in the input data to the GBD 2015 cause list. This included 40 maps for vital registration data, 279 for verbal autopsy data sources, and 92 for other data types. The largest and most universal maps used were those for ICD9 and ICD10 detail vital registration data. The input data causes varied from 3-4 digit ICD codes to custom cause lists with cause names such as cholera or hepatitis. Our mapping process made it possible to compare these various data sources across demographic groups.

Appendix Table 12. shows the ICD10-detail and ICD9-detail codes included in the mapping of each GBD cause.

### 2.1 India urban/rural splitting

Another source of data for urban and rural state estimation of cause of death trends in India is the Civil Registration System (CRS), from which we retrieved usable data over the period 1983-1995. From 1983-1987, data were available for the urban and rural populations of each state in the system. However, after 1988, only state-level data were available.

We can only use data at the most detailed location level that we estimated for cause of death models. As a result, in order to use of all years of the CRS data split state-level mortality into urban and rural state-level mortality. To do this, we assumed the same relative rate of cause-specific urban and rural mortality in 1988-1995 as was present in the data in 1983-1987. We applied the same algorithm that is used for age-sex splitting, modified for this purpose:

$$D_{s,u,y,a,x,c} = R_{s,u,c} N_{s,u,y,a,x} \frac{D_{s,y,a,x,c}}{\sum_{u=rural}^{u=urban} (R_{s,u,c} N_{s,u,y,a,x})}$$

Where:

$D_{s,u,y,a,x,c}$  = Number of observed deaths in state  $s$ , urbanicity  $u$  (either rural or urban), year  $y$ , age  $a$ , sex  $x$ , and cause  $c$

$R_{s,u,c}$  = Death rate in state  $s$ , urbanicity  $u$ , cause  $c$  from 1983-1987; data were not suitable for age or sex specific rates.

$N_{s,u,y,a,x}$  = GBD-estimated population in state  $s$ , urbanicity  $u$ , year  $y$ , age  $a$ , sex  $x$



$D_{s,y,a,x,c}$  = Number of observed deaths in state  $s$ , year  $y$ , age  $a$ , sex  $x$ , and cause  $c$  (the deaths that are being split)

The result was a full time series of CRS data for both rural and urban populations of each state in the CRS system.

## 2.2 State splitting

This step is described in step 1.2, above.

## Step 3. Age-sex splitting

### 3.1 Generate global age-sex weights by cause

Different sources, particularly verbal autopsy studies, report deaths for a wide range of age-groups with varying intervals. For the analysis of causes of death, we mapped these different age intervals to the GBD standard set of age-groups. The approach to undertake this mapping was the same as in the prior two GBD studies, GBD 2013 and GBD 2010.

In the process of assembling a consolidated demographic database, perhaps the most impairing source of inconsistency is the aggregation of age groups. It is conventional to report such data in broad age groupings such as “0-4, 5-14, 15-49,” or to report data with both sexes together. The issue of comparability between age-sex groups arose when assembling the GBD cause of death database. The compiled database included 22 distinct tabulation formats for infants and 141 distinct tabulation formats for non-infants. We developed a tool, which we call age-sex splitting, that takes aggregated age groupings, and likewise the “both sexes combined” grouping, and divides them into what their constituent age groups would likely have been using respective cause-specific and country-specific age distributions. The analytical framework for the GBD includes three infant age categories: Early neonatal (0-6 days), late neonatal (7-27 days) and post neonatal (28 days to one year), and 17 non-infant age categories starting with age one to four years, then proceeding in five-year age groups until the terminal age group of 80+. We treat unknown ages and sexes in the same manner we treated the “all ages combined” age category and “both sexes combined” sex group. Through this process, we were able to directly compare all data sources on even terms.

The approach to age splitting is based on the following formula. The key assumption underlying this formula is that the relative risk of death by age group compared to a reference age group is invariant across populations. While this assumption is likely violated in specific cases, there is a strong biologically based pattern of the relative risk of death for a cause by age that is observed for most causes. The basic formula is as follows:

$$D_a = R_a N_a \left( \frac{D_a^{a+x}}{\sum_a^{a+x} (R_a N_a)} \right)$$

Where:

$D_a$  = the number of deaths from a cause in age group  $a$

$R_a$  = the relative risk of death in age group  $a$  compared to a reference group

$N_a$  = the country-year-sex-specific population in age group  $a$

$D_a^{a+x}$  = the number of deaths in the age group  $a$  to  $a+x$



With the assumption of invariant relative risks of death by age with respect to a reference age group, this equation can be used, along with population distribution by age, to split an aggregate number of deaths for the age groups  $a$  to  $a+x$  into specific deaths for each age group within the aggregate interval.

In some cases, deaths are reported for an aggregate age group for both sexes combined. The task in this case is more complicated, but the same principle can be applied. In this case we assumed that the relative risks of death by and sex are constant.

$$D_{as} = R_{as}N_{as}\left(\frac{D_a^{a+x,s}}{\sum_a^{a+x}(R_{as}N_{as})}\right)$$

Where:

$D_{as}$  = the number of deaths from a cause in age group  $a$ , sex  $s$

$R_{as}$  = the relative risk of death in age group  $a$  compared to a reference group for sex  $s$

$N_{as}$  = the country-year-sex-specific population in age group  $a$  for sex  $s$

$D_a^{a+x,s}$  = the number of deaths in the age group  $a$  to  $a+x$  for sex  $s$

This equation can be used to split data aggregated over age and sex. The assumption, however, of invariant relative risks across age and sex is a stronger assumption. Fortunately, data pooled across sexes are less common in the published or unpublished cause of death data.

The relative risk of death in a particular age group for a given sex is derived from the global distribution of cause-specific mortality rates found in available vital registration data. Location-years from the following code systems are used, provided they report the requisite age- and sex-detail: ICD7, ICD8, ICD9 BTL, ICD10 tabulated, ICD9, and ICD10. Upon compiling these data, we mapped them to GBD causes, and aggregated up to cause level 3. This is the level at which a particular cause is split – that is, any daughter cause of a level 3 parent is split using the age distribution of that parent (so, chronic kidney disease due to diabetes would be split using the age pattern of chronic kidney disease).

We next adjusted separately for estimated adult and child vital registration completeness. Location-year-age-sex-specific deaths and population were then aggregated across all location-years, in order to produce cause-specific mortality rates by age and sex. These were used to determine the risk of death at any age relative to any reference age group.

#### Step 4. Correct age-sex violations

Occasionally, data sources will include deaths by a cause for which there is medical consensus that death is impossible for the sex and age. For example, there may be some number of deaths due to cervical cancer in males, or deaths due to maternal causes in ages under 10. We have constructed a conservative list of age-sex restrictions. When deaths violate these restrictions, we redistribute them proportionally onto all causes.

#### 4.1 GBD age-sex restrictions by cause

All restrictions are included in Appendix Table 13. Age-sex restrictions by cause.

### Step 5. Redistribution

A crucial aspect of enhancing the comparability of data for cause of death is to deal with uninformative, so-called garbage codes. Garbage codes are codes to which deaths were assigned that cannot or should not be considered as the underlying cause of death, for example: heart failure, ill-defined cancer site, senility, ill-defined external causes of injuries, and septicaemia. The methods for redistributing these garbage-coded deaths were outlined in detail in Naghavi et al,<sup>5</sup> and the underlying algorithm for redistributing deaths assigned to these codes has not changed since GBD 2013.

#### 5.1 Redistribute HIV-related garbage

The list of garbage codes known to be used to code deaths caused by HIV/AIDS can be found in Appendix Table 14. HIV-related garbage code redistribution packages.

Due to the disparate nature of HIV/AIDS mortality across space and time, dynamic redistribution of HIV/AIDS-related garbage codes was needed. To inform this redistribution, we generated target proportions for each garbage group by age band (Under 1 month, 1-59 months, 5-19 years, 20-49 years, 50-59 years, 60-69 years, 70-79 years, and 80+ years), 5-year time interval, and sex. The garbage groups will either target HIV or a remainder target. The allotment of deaths to either of these is based on the regional increase in the mortality rate of all codes in the group relative to the rates seen in 1980-1984 – an increase greater than 5% is assumed to be HIV/AIDS-related, and the proportion of those deaths exceeding 5% are redistributed to HIV/AIDS. Any increase  $\leq 5\%$  is then assigned to the remainder target.

#### 5.2 Regress garbage codes versus non-garbage

As in GBD 2013, the statistical analysis used to determine proportions for garbage code redistribution for ill-defined cancer sites, ill-defined external causes of injury, unspecified stroke, heart failure, hypertension, and atherosclerosis was based on the approach outlined by Ahern et al.<sup>6</sup> For each redistribution package, we defined the “universe” of data as all deaths coded to either the package’s garbage codes or the package’s redistribution targets for each country, year, age, and sex. We then ran a regression based on the following equation, separately for each target group and sex:

$$TG_{crt} = \alpha + \beta_1 Gar_{crt} + \beta_2 Age_{crt} Gar_{crt} + \theta_r Gar_{crt} + \gamma_r + \varepsilon_{ct}$$

$TG_{crt}$  = percentage of deaths within the given garbage code’s universe which were coded to a given target group, by country

$Gar_{crt}$  = percentage of deaths within the given garbage code’s universe which were coded to a given set of garbage codes

$\alpha$  = constant

$\beta_1$  = slope coefficient describing the association between  $Gar_{crt}$  and  $G_{crt}$

$\beta_2$  = slope coefficient describing the association between the interaction  $Age_{crt} Gar_{crt}$  and  $G_{crt}$

$\gamma_r$  = region specific random intercept (or super region if the random effect on region is not significant)

$\theta_r$  = region specific random slope (or super region if the random effect on region is not significant)

$\varepsilon_{ct}$  = standard error, normally distributed and calculated by bootstrapping

This regression was adjusted from GBD2013 to include fixed effects on the interaction of garbage and age to ensure smooth age patterns. We made this decision after investigating diagnostic visualizations that showed unlikely gaps between proportions assigned to different age groups.

Once proportions were produced for each country, sex, age, and target group, certain adjustments were made to conform our packages to the best medical evidence available. In some cases, we implemented restrictions on the proportions that the regressions could yield. For example, we did not allow any redistribution onto Chagas disease outside of Latin America and the Caribbean, or suicide under the age of 15. In other cases, we capped the proportion for some targets to the level that would be produced from proportional redistribution; for example, hemoglobinopathies and hemolytic anemias were restricted to the level of proportional redistribution in the redistribution of left heart failure. Occasionally, further adjustments were made on a case-by-case basis per country, age, sex, and target group to suppress the impact of outliers based on existing epidemiological evidence and expert judgment.

### 5.3 VA anemia adjustment

To compensate for the over-representative cause fractions from anemia found in verbal autopsy studies, we redistributed these deaths based on the causal attribution of severe anemia from the GBD 2013 study. The proportions were country-year-age-sex specific.

### Step 6. HIV/AIDS misclassification correction

In many location-years, certain causes of death known to be comorbid with HIV/AIDS (e.g., tuberculosis, other infectious diseases) are seen to have age-patterns that diverge from those observed in location-years without widespread HIV/AIDS epidemics, and are in fact more reflective of HIV/AIDS mortality trends. In order to identify these instances, a global relative age pattern is generated using all VR deaths in countries with observed HIV prevalence less than 1% using the following:

$$RR_{asc} = R_{asc} / \bar{x}(R_{65sc}, R_{70sc}, R_{75sc})$$

Where  $RR_{asc}$  is the relative death rate for age group  $a$ , sex  $s$ , and cause  $c$ ;  $R_{asc}$  is the rate for that age group; and  $\bar{x}(R_{65sc}, R_{70sc}, R_{75sc})$  is the mean of the rates in ages 65-69, 60-74, and 75-79 for that sex and cause. This is preferable to comparing mortality rates because we are able to isolate divergence in age pattern while accounting for varying levels of overall mortality by fixing death rates to age groups that are unlikely to be confounded by the presence of HIV. Expected deaths for an identified cause were then determined to be:

$$ED_{lyasc} = \bar{x}(R_{ly65sc}, R_{ly70sc}, R_{ly75sc}) * p_{lasc} * RR_{asc}$$

Where  $ED_{lyasc}$  are deaths for location  $l$ , year  $y$ , age group  $a$ , sex  $s$ , and cause  $c$ ;  $\bar{x}(R_{l65sc}, R_{l70sc}, R_{l75sc})$  is the mean of the rates for ages 65-69, 60-74, and 75-79 for that location-year-sex-cause;  $p_{lasc}$  is the

population for that location-year-age-sex-cause; and  $RR_{asc}$  is the global standard relative rate determined in the previous step for that age-sex-cause. The expected deaths remain attributed to that particular cause, while the difference between observed and expected are reallocated to HIV/AIDS.

### Step 7. Scale strata to province

Over time, a higher proportion of deaths have been registered in China through the expansion of the Disease Surveillance Point (DSP) system and provincial and county efforts to increase cause of death registration. With the expansion of coverage, it is possible that province aggregates do not accurately represent the population distribution between urban and rural areas in each year. For this reason, we stratified the data preparation by urban and rural status for each county within each province. Stratification was based on the median level of urbanization across counties within each province as recorded in the 2010 China census. In the provinces of Tibet and Hainan, all counties were placed into one strata based on largely homogeneous urbanization levels within each province. This yielded a total of 62 analytical province-strata. Macao and Hong Kong were not included in this stratification system as the VR systems there are independent from that on the mainland; no weighting scheme needs to be carried out in these complete VR systems with quality data on causes of death.

Within each province-strata, a larger proportion of deaths in-hospital might be reported than that of deaths outside of hospital because of the internet hospital reporting system. To avoid bias, we reweighted in-hospital and out-of-hospital deaths based on the age-sex-province-specific fraction of deaths in and out of hospital in the DSP system. DSP data have been used to establish these percentages because, in these communities, there is a concerted effort to identify all out-of-hospital deaths. Province-strata death rates are combined to produce overall province death rates by weighting each strata by population in each age-sex-year group. Province death rates are rescaled so that all-cause mortality equals the estimated death rate in each age-sex-year estimated in the life-table analysis. The Bayesian noise reduction algorithm was used to deal with zero counts and small number issues for rare causes.<sup>7</sup>

### Step 8. Restrictions post-redistribution

Some causes of death can only be reliably assigned through an autopsy by a trained physician. For example, it is unlikely that a verbal autopsy would reliably distinguish between ischemic and hemorrhagic stroke.

In this step, it is ensured that the detail of the cause list at this point in the data prep process is reasonable given the detail of the original data source and the methods by which the cause of death was assigned. Two primary corrections are applied. First, any cause which is purely an artifact of the redistribution machinery targeting too detailed a cause is aggregated up to the parent cause. Second, a “bridge map” is applied over a certain set of sources to ensure that these sources do not contain causes which could not reliably be determined by the methodology. These two corrections are applied to ICD9-BTL, ICD10-tabulated, USSR tabulated ICD9, India MCCD reports, China-DSP-tabulated-ICD9, India SCD reports, and all verbal autopsy sources.

## Step 9. Drop VR country years or mark as non-representative based on completeness

Lozano and colleagues<sup>8</sup> describe the negative impact that low-completeness vital registration (VR) data can have on cause of death modeling for the GBD 2010. In particular, in settings where a data source does not capture all deaths in a population, the cause composition of deaths captured might be different from those that are not. However, a completeness sensitivity test found that low-completeness VR data had little impact on the cause-specific mortality trends at the global level.

For GBD 2015, we investigated the impact of these data at the country and subnational levels using the more thorough diagnostic visualizations available to us. It was determined that these data produced unlikely trends in the models affected. Despite the minimal impact on global trends, better models were produced by eliminating or marking as non-representative data with extremely low completeness. VR completeness was estimated using the Distribution of Death Methods (DDM) described in Part 1 of the appendix.

For this round, vital registration location-years with completeness below 50% were dropped, while location-years with completeness between 50-69% were marked as non-representative.

The following country-years were dropped from the database:

| Location Years Below 50% Completeness |                              |
|---------------------------------------|------------------------------|
| Location                              | Years Below 50% Completeness |
| 'Asir                                 | 1999 - 2012                  |
| Bahah                                 | 1999 - 2012                  |
| Eastern Province                      | 1999 - 2003                  |
| Ha'il                                 | 1999 - 2012                  |
| Haiti                                 | 1981, 1999, 2002 - 2004      |
| Iran                                  | 1980 - 1985, 1987            |
| Jawf                                  | 1999 - 2012                  |
| Jizan                                 | 1999 - 2012                  |
| Makkah                                | 1999 - 2005                  |
| Maranhão                              | 1985                         |
| Najran                                | 1999 - 2012                  |
| Northern Borders                      | 1999 - 2012                  |
| Papua New Guinea                      | 1980                         |
| Qassim                                | 1999 - 2003                  |
| Riyadh                                | 1999 - 2012                  |
| Tabuk                                 | 1999 - 2002                  |
| Turkey                                | 1983, 1984, 1987 - 1995      |

## Step 10. Cause aggregation

The cause list is organized in a top down hierarchical format containing 4 levels. The first group, or level 1, sums all causes. Following all cause-mortality are level 2 causes, which include 3 broad groupings of causes of deaths: communicable, maternal, neonatal, and nutritional diseases; non-communicable diseases; and injuries. Within those level 2 groupings are finer levels used for modeling. Level 3, or parent causes, are aggregated, meaning the mortality estimate for a parent cause in the hierarchy represents the sum of the causes under that rubric. Sub-causes within level 3 causes – level 4 – are more

detailed. For example, the parent cause “intestinal infectious diseases” contains the 3 sub-causes: typhoid fever, paratyphoid fever, and other intestinal infectious diseases. Included in the parent cause estimate are deaths mapped directly to the parent and any level 4 sub-causes. In data where there was not enough information to assign a level 4 cause, we aggregated to the level 3 parent cause. Exceptions to aggregating the level 4 sub-causes to the parent are instances when certain sub-causes are not present. The United Nations Crime Trends police data only identifies homicides, aggregating homicides to injuries would not accurately represent all injuries.

## Step 11. Remove shocks and HIV/AIDS maternal adjustments

For GBD 2015, CODEm models use an HIV/AIDS- and shock-free envelope, as described in Part 1 of the appendix. In order to be comparable, cause fractions must also be HIV/AIDS- and shock-free. Cause fractions were uploaded to the Causes of Death database as the number of deaths due to the cause over an adjusted sample in which the number of deaths due to HIV/AIDS, collective violence and legal intervention, and exposure to forces of nature were removed.

### 11.1 Remove HIV/AIDS, shocks from denominator where HIV/AIDS in cause list

The first step to generate HIV- and shock-free cause fractions was to remove any deaths from the sample which were directly coded to HIV/AIDS, collective violence and legal intervention, or exposure to forces of nature. The resulting equation for a cause fraction uploaded to the database is simple:

$$CF_{l,t,a,x,c} = \frac{D_{l,t,a,x,c}}{D_{l,t,a,x} - D_{l,t,a,x,hiv} - D_{l,t,a,x,war} - D_{l,t,a,x,disaster}}$$

In this equation,  $CF_{l,t,a,x,c}$  is the cause fraction for a location (l), year (t), age (a), sex (x), and cause (c),  $D_{l,t,a,x,c}$  is the number of deaths observed in the sample for the same,  $D_{l,t,a,x}$  is the total number of deaths observed in the sample in the location, year, age and sex, and  $D_{l,t,a,x,hiv}$ ,  $D_{l,t,a,x,war}$ , and  $D_{l,t,a,x,disaster}$  are the number of deaths observed in the sample for HIV/AIDS, collective violence and legal intervention, and exposure to forces of nature, respectively.

Cause fractions for HIV/AIDS and shock causes were also uploaded to the database for use in separate estimation processes described in Part 1 of the appendix. In this case, cause fractions followed the standard equation, with variables following the same explanation as above:

$$CF_{l,t,a,x,c} = \frac{D_{l,t,a,x,c}}{D_{l,t,a,x}}$$

### 11.2 Remove HIV/AIDS deaths from maternal mortality sources

HIV-free cause fractions were also uploaded for sources on mortality due to maternal causes. In these cases, the sample of all deaths observed in the study is likely to contain some amount of deaths due to HIV/AIDS and shocks, but the sample only includes cause information on maternal deaths. To account for the presence of HIV/AIDS and shocks in the entire sample, we assumed the same proportion of total deaths due to HIV/AIDS by location, age, sex, and year as provided from the estimation of HIV/AIDS and all-cause mortality described in Part 1 of the appendix.

Maternal mortality studies were only corrected for HIV/AIDS if the sample of total deaths was provided in the data source. Where sources only provided the Maternal Mortality Rate (MMR), we applied the

rate to the HIV- and shock-free envelope produced by the analysis described in Part 1 of the appendix and thus did not need to adjust cause fractions at this point in the process.

Where a correction was applied, we applied the following equation:

$$CF_{l,t,a,x,mat} = D_{l,t,a,x,mat} * \frac{E[D_{l,t,a,x,hiv\_shock\_free}]}{E[D_{l,t,a,x}]}$$

In this equation, X is the resulting cause fraction due to maternal causes for the location (l), year (t), age (a), and sex (x);  $D_{l,t,a,x,mat}$  is the number of observed deaths in the sample due to maternal causes,  $E[D_{l,t,a,x}]$  is the GBD estimate of all-cause mortality in the location, year, age, and sex, and  $E[D_{l,t,a,x,hiv\_shock\_free}]$  is the GBD estimate of HIV- and shock- free mortality in the location, year, age, and sex.

### 11.3 HIV/AIDS correction of sibling history, census, and survey data

As described in our analysis from GBD 2013, many studies have failed to find increased mortality in HIV-positive pregnant mothers, but those who have advanced HIV are known to have increased baseline mortality. Prior to GBD 2013, we did not distinguish between deaths in HIV+ women that were caused by pregnancy and those for which the pregnancy was incidental to their death. In order to more explicitly quantify the contribution of pregnancy to death in HIV+ women, and therefore more accurately estimate the maternal death count, we completed two additional analyses for GBD 2013. First, we determined the population attributable fraction (PAF) of HIV/AIDS to pregnancy-related death. Second, we determined the proportion of pregnancy-related deaths in HIV-positive persons that are aggravated by pregnancy and are therefore by definition maternal deaths.

$$PAF = \frac{p(RR - 1)}{1 + p(RR - 1)}$$

Where PAF is the population attributable fraction, p denotes the prevalence of HIV in pregnancy, and RR is relative risk of mortality in HIV+ vs HIV- pregnant females.

To recap our analysis for GBD 2013, we used the paper published by Calvert and Ronsmans to identify sources<sup>9</sup> that could inform Step 1 of our HIV-correction analysis. We independently reviewed each of the component studies in Calvert and Ronsmans' review and extracted data directly, not from the systematic review paper. We only identified one additional study that was not used in Calvert and Ronsmans' analysis. We have, however, not used all the studies included in that review. Specific details are as follows: 1) Figueroa-Damian, et.al was excluded for not including any postpartum deaths at all. 2) In the case of Ryder, et al. and Zvandasara, et al. we excluded those deaths > 12 months after delivery. 3) We excluded the results from Chilongozi, et al. from the site that did not include any HIV-negative patients. 4) Leroy, et al. was not in the bibliography. We could not locate it for review so it was excluded. 5) Kourtis et al. was extracted with adjustment of the denominator based on the average number of hospitalizations per delivery in each group. 6) Ticconi, et al. was excluded for being both non-representative and including subgroup data from mothers with malaria infection. A total of 21 sources were included in our analysis of the increased mortality risk of HIV+ versus HIV- women in pregnancy.<sup>9</sup> We performed DerSimonian-Laird random effects meta-analysis to derive a pooled estimate of RR of death during pregnancy given HIV positivity.<sup>10</sup> The pooled effect size was 6.40 (95% UI 3.98 – 10.29) which was then used to calculate an HIV PAF for each country, age group and year. In order to

determine the proportion of those HIV-related deaths that were attributable to maternal causes, we performed a second systematic literature review. This time we sought evidence for the excess mortality risk of pregnancy in those women who are already HIV-positive. Most studies have failed to find such an effect, but most also did not stratify their study population by stage of HIV or ART status. Only two studies did this stratification, with a pooled effect size of 1.13 (95% UI 0.73 – 1.77).

An updated literature review to inform the relative risk of mortality in pregnancy in HIV-positive versus HIV-negative women had 14 hits, but no usable sources. We completed this search on May 7, 2015, using the following two search strings:

("HIV"[Mesh] OR "Acquired Immunodeficiency Syndrome"[Mesh]) AND ("Pregnancy"[Mesh] OR "Postpartum Period"[Mesh]) AND "Mortality"[Mesh]

"HIV"(MeSH) AND ("pregnant"(Title/Abstract) OR "pregnancy"(Title/Abstract) OR "postpartum"(Title/Abstract) OR "post partum"(Title/Abstract)) AND ("mortality"(Title/Abstract) OR "death"(Title/Abstract))"

Prevalence of HIV in pregnant women was calculated using UNAIDS' Spectrum model. Spectrum is a compartmental HIV progression model used to generate age-specific incidence, prevalence, and death rates from pre-calculated incidence curves and assumptions about intervention scale-up and local variation in epidemiology. For each location, we used UNAIDS' age-specific ratios of fertility in women living with HIV to fertility in women not living with HIV. In most locations, this ratio is assumed to be greater than one in women aged 15-24 and less than one and decreasing as age increases beyond 24. Since Spectrum assumes fertile ages of 15-49, we used the ratio of HIV prevalence in pregnant women to HIV prevalence in the general population at either end of that range to extend estimates to age bands 10-14 and 50-54.

Unlike GBD 2013, when we applied the PAF correction to the envelope of maternal deaths predicted by CODEm, we instead applied country-year-age-group-specific PAF to maternal mortality input data prior to modeling in CODEm. This ensured that both the numerator and denominator of all CF data were internally consistent in their exclusion of background HIV/AIDS mortality. The cause fractions for maternal deaths in sibling history, survey, and census data were therefore adjusted as follows:

$$CF_{l,t,a,x,mat_{adj}} = CF_{l,t,a,x,mat} * (1 - prop_{hiv_{l,t,a,x}})$$

$$prop_{hiv_{l,t,a,x}} = PAF_{l,t,a,x,hivpos} * (1 - \pi_{mat})$$

$$CF_{l,t,a,x,mat_{hiv}} = CF_{l,t,a,x,mat} * prop_{maternalhiv_{l,t,a,x}}$$

$$prop_{maternalhiv_{l,t,a,x}} = PAF_{l,t,a,x,hivpos} * \pi_{mat}$$

Where:

$\pi_{mat} = .13/1.13$  = The proportion of HIV/AIDS deaths during pregnancy that were exacerbated by the pregnancy.

$PAF_{l,t,a,x,hivpos}$  = The population-attributable fraction (PAF) that describes the percentage of all maternal deaths that were HIV-related for the location (l), year (t), age (a), and sex (x=Female)).



$CF_{l,t,a,x,mat}$  = The proportion of deaths due to all maternal causes before HIV/AIDS correction for the location, year, age, and sex.

$prop_{hiv_{l,t,a,x}}$  = The proportion of deaths in pregnancy for the location, year, age, and sex that are estimated to be incidental deaths due to HIV/AIDS, and therefore not a maternal cause of death.

$prop_{maternalhiv_{l,t,a,x}}$  = The proportion of deaths in pregnancy for the location, year, age, and sex that are estimated to be HIV-positive and maternal deaths which are aggravated by HIV/AIDS.

$CF_{l,t,a,x,mat_{adj}}$  = The proportion of deaths due to maternal causes after the adjustment for the location, year, age, and sex.

$CF_{l,t,a,x,mat_{hiv}}$  = The proportion of deaths due to maternal deaths aggravated by HIV/AIDS after the adjustment for the location, year, age, and sex.

#### 11.4 HIV/AIDS correction of other maternal mortality data

Although there are a specific subset of codes in ICD-10 that correspond to HIV/AIDS deaths aggravated by pregnancy, these codes are sparsely used and unreliable. We therefore adapted the method above to also correct VR and VA sources for the systematic exclusion of HIV-related maternal deaths. This correction was calculated in the same manner, using the same input data as above, with the only difference that HIV correction of VR and VA sources resulted in a net increase in maternal CF. Maternal deaths aggravated by HIV/AIDS are calculated as the following:

$$CF_{l,t,a,x,mat_{hivvr}} = CF_{l,t,a,x,matvr} * prop_{maternalhiv_{l,t,a,x}}$$

$$prop_{maternalhiv_{l,t,a,x}} = \frac{PAF_{l,t,a,x,hivpos} * \pi_{mat}}{1 - PAF_{l,t,a,x,hivpos} * \pi_{mat}}$$

Where all symbols are the same as described above.

#### Step 12. Noise reduction

To deal with problems of zero counts in vital registration, verbal autopsy, cancer registries, or sibling histories for a given age group in a given year, we use a Bayesian noise reduction algorithm. For this algorithm, we assume a normal prior and a normal data likelihood. We estimate the normal prior for a given country series of data by estimating a negative binomial for the fraction of deaths in each age group due to each respective cause with dummy variables for age and year. With two notable exceptions (detailed below), these regressions are country-specific, so borrowing strength over age is only within a data type in a country. The variance of the prior,  $\tau^2$ , is estimated from the negative binomial regression, taking into account the variance-covariance matrix of the regression coefficients. For the data variance, we use the Wilson approximation which provides an estimate of  $\sigma^2$  even in cases with a zero count of cause-specific deaths. The posterior estimate for each data point is:

$$Mean = \left( \frac{\tau^2}{\tau^2 + \sigma^2} X + \frac{\sigma^2}{\tau^2 + \sigma^2} \mu \right)$$

$$Variance = \left( \frac{\tau^2 \sigma^2}{\tau^2 + \sigma^2} \right)$$

Where  $X$  is the mean of the data and  $\mu$  is the mean of the prior. This approach to noise reduction avoids the problem that zero counts in an  $\ln$  rates model or a logit cause fraction model will be dropped from the regression and lead to upward bias in the estimates. This is particularly important in two settings: high-income countries with small numbers of cause-specific deaths, and in the analysis of sibling history data where for any given age group in any given year the number of deaths reported in the survey that are pregnancy-related or the number of deaths from all causes in that age group may be small.

Regarding the exceptions to the regression, the first is that country-years with populations under 1 million are pooled with the region data in order to prevent overdispersion and provide a stronger signal. Additionally, verbal autopsy data diverge from the above description in two ways. First, all data for a given super-region are pooled together and a study dummy variable is added, allowing for different studies and surveillance sites to borrow strength from one another within a super-region. Second, unless the data are part of a time series (e.g., Matlab HDSS), there is no year component to the regression.

### 13. COD database and outlier identification

Death rates for different causes of death generally have a stable age pattern. In large populations, these patterns will not change very rapidly over time. We can assume a relatively stable pattern in death rates for all causes except for some epidemic diseases and specific types of injuries. Rare causes in large populations and prevalent causes in small populations usually have stochastic patterns. To correct for these stochastic patterns we implement a noise reduction process, explained in Step 12.

In vital registration data, we infrequently find one or more data points for specific geography/age/sex/years that lie very far from the stable pattern of death rates. In these situations, the model will usually ignore the data point(s). If the model fails to ignore these data, dramatic jumps or drops can occur in the death rates. When there is no logical explanation for variation in the death rates to this degree, we outlier the data point(s). The selection of data points to outlier occurs after data have been prepped for modeling, as well as during preliminary reviews of the models.

In non-vital-registration sources, data collection methods and data quality can vary widely from source to source. Where data points in each age-sex-geography-year are very sparse, extreme data points can have a bad effect on regional estimation. In these situations we investigate the study's methods and outlier lower-quality data points.

Identifying outliers in the cause of death data occurs prior to finalization of models for each cause. We do not automate the selection of outliers, but investigate the source of the offending data as well as

reviewing other data sources for the same cause, geography, and year. Ultimately, outliers are identified based on the judgement of the modeler and senior faculty and are reversible to allow for decisions to be revisited in the future.

## References

- 1 Lozano R, Freeman MK, James SL, *et al.* Performance of InterVA for assigning causes of death to verbal autopsies: multisite validation study using clinical diagnostic gold standards. *Popul Health Metr* 2011; **9**: 50.
- 2 Office of the Registrar General and Census Commissioner. India Special Survey of Deaths. India, 2004.
- 3 Office of the Registrar General and Census Commissioner. India Medical Certification of Cause of Death Reports 1990-2010. India, 2014.
- 4 Office of the Registrar General and Census Commissioner. India Medical Certification of Cause of Death Reports 1980-1986. India.
- 5 Naghavi M, Makela S, Foreman K, O'Brien J, Pourmalek F, Lozano R. Algorithms for enhancing public health utility of national causes-of-death data. *Popul Health Metr* 2010; **8**: 9.
- 6 Ahern RM, Lozano R, Naghavi M, Foreman K, Gakidou E, Murray CJ. Improving the public health utility of global cardiovascular mortality data: the rise of ischemic heart disease. *Popul Health Metr* 2011; **9**: 8.
- 7 GBD 2013 Mortality and Causes of Death Collaborators. Global, regional, and national age-sex specific all-cause and cause-specific mortality for 240 causes of death, 1990-2013: a systematic analysis for the Global Burden of Disease Study 2013. *Lancet* 2015; **385**: 117–71.
- 8 Lozano R, Naghavi M, Foreman K, *et al.* Global and regional mortality from 235 causes of death for 20 age groups in 1990 and 2010: a systematic analysis for the Global Burden of Disease Study 2010. *Lancet* 2012; **380**: 2095–128.
- 9 Calvert C, Ronsmans C. The contribution of HIV to pregnancy-related mortality: a systematic review and meta-analysis. *AIDS* 2013; **27**: 1631–9.
- 10 DerSimonian R, Laird N. Meta-analysis in clinical trials. *Control Clin Trials* 1986; **7**: 177–88.

## Part 3: Causes of death modeling methods

### 1. CODEm

#### 1.1 Overview of method

CODEm is a framework for modeling most cause-specific death rates in the GBD using five core principles: 1) Identify and use all the available data in the modeling process. Though data may vary in quality it all contains some signal of the true epidemiological process. 2) Develop a diverse set of plausible models to use for estimation. That is, build a number of models capturing well-documented associations to make estimates. 3) Assess the predictive validity of each plausible individual model and of an ensemble of models created from the pool of plausible models. 4) Choose the models and ensemble model with the best performance in the out-of-sample predictive validity tests.

For some causes, separate models were run for different age ranges when there was reason to believe that the relation between covariates and death rates might be different in different age ranges, for example, in children compared with adults. Separate models are developed for countries with extensive, complete, and representative VR for every cause such that uncertainty can better reflect the more complete vital registration in these locations. A complete listing of countries with extensive, complete, and representative VR can be found in Appendix Table 37.

#### 1.2 Model pool development

As many factors covary with a particular cause of death, a large range of plausible statistical models are developed for each cause. For the CODEm framework, four families of statistical models are developed using covariates (see 2x2 table in Foreman et al).<sup>1</sup> These are mixed effects linear models of the natural log of the death rate, mixed effects linear models of the logit of the cause fraction, spatiotemporal Gaussian process regression (ST-GPR) models of the log of the death rate, and ST-GPR of the logit of the cause fraction. All plausible relationships between covariates and relevant cause are identified, and all possible permutations of selected covariates are tested in linear models where the logit cause fraction or log death rate is the response variable. Because we test all permutations of covariates, multicollinearity between covariates may produce implausible signs on coefficients or unstable coefficients. All models where the sign on the coefficient is in the direction expected based on the literature and where the coefficient is statistically significant at  $p < 0.05$  are retained. We run covariate selection for both cause fractions and death rates and then create both mixed effects only and ST models for each set of covariates. For a detailed explanation of the covariate selection algorithm see Foreman et al 2012.<sup>1</sup>

#### 1.3 Testing model pool on 15% sample

The performance of all component models and ensembles is evaluated using out-of-sample predictive validity tests. Thirty percent of the data are excluded from the initial model fits, and half of that (15% of total) is used to evaluate and rank component models and then build ensembles. Data are held out from the analysis using the pattern of missingness for each cause in the cause of death database. Out-of-sample predictive validity testing is repeated until stable model results have been obtained. The out-of-sample performance tests include the root mean squared error of the log of the cause-specific death rate, the direction of the trend in the prediction compared to the data, and the validity of the 95% UI. For every model, we show the in-sample root mean squared error of the log

death rates (RMSE) and the out-of-sample performance in the 15% of data not used in the model building process.

#### 1.4 Ensemble development

After component models are ranked on their out-of-sample predictive validity they are weighted based on their ranking and each component model contributes a portion to the final estimate. How much each submodel contributes is a function of its relative ranking as well as the value of psi chosen, which dictates that distribution of rankings (see Foreman et al 2012 for the details of psi distribution).<sup>1</sup>

#### 1.5 Testing ensembles

Using the second half of the holdout data (15% of total), the differently weighted ensembles and different values of psi are tested using the same predictive validity metrics as the component models. For every model, we show the in-sample root mean squared error of the log death rates (RMSE) and the out-of-sample performance in the 15% of data not used in the model building process. The ensemble with the best average trend and RMSE is chosen as the final ensemble weighting scheme.

#### 1.6 Final estimation

After a model weighting scheme has been chosen, each model contributes a number of draws proportional to its weight such that 1,000 draws are created. The mean of the draws is used as the final estimate for the CODEm process and 95% UI are created from the 0.025 and 0.975 quantiles of the draws. The final assessment of ensemble model performance is the validity of the UIs; ideally, the 95% UI for a model would capture 95% of the data out-of-sample. Higher coverage suggests that UIs are too large and lower than 95% suggest UIs are too narrow.

#### 1.7 Causes for which CODEm is used – criteria for those where CODEm is not used

CODEm is used to model 167 causes, which are described in detail below. CODEm is unsuitable for use in modeling some causes, including those with very low death counts, when cause-specific death record availability is inadequate, or when there are marked biases or variability for cause of death certification over time which could not be fully accounted for with the current garbage code redistribution algorithms. Criteria for causes where CODEm is not used are discussed in further detail in Section 3 below.

#### 1.8 Covariates used for each CODEm model plus CODEm model hyper parameters

For details on covariates used for CODEm models, see Appendix Table 15. CODEm covariates used, level of covariate, and expected direction of covariate by cause, sex, age, and location.

#### 1.9 Fit statistics for CODEm models

For details on fit statistics for CODEm models, see Appendix Table 16. CODEm predictive validity results by cause, sex, age, and location.

CODEm was used for 167 causes of death. Descriptions for each of these causes are below.

<sup>i</sup> Foreman KJ, Lozano R, Lopez AD, Murray CJ. Modeling causes of death: an integrated approach using CODEm. *Population Health Metrics* 2012; 10: 1.

# Otitis Media

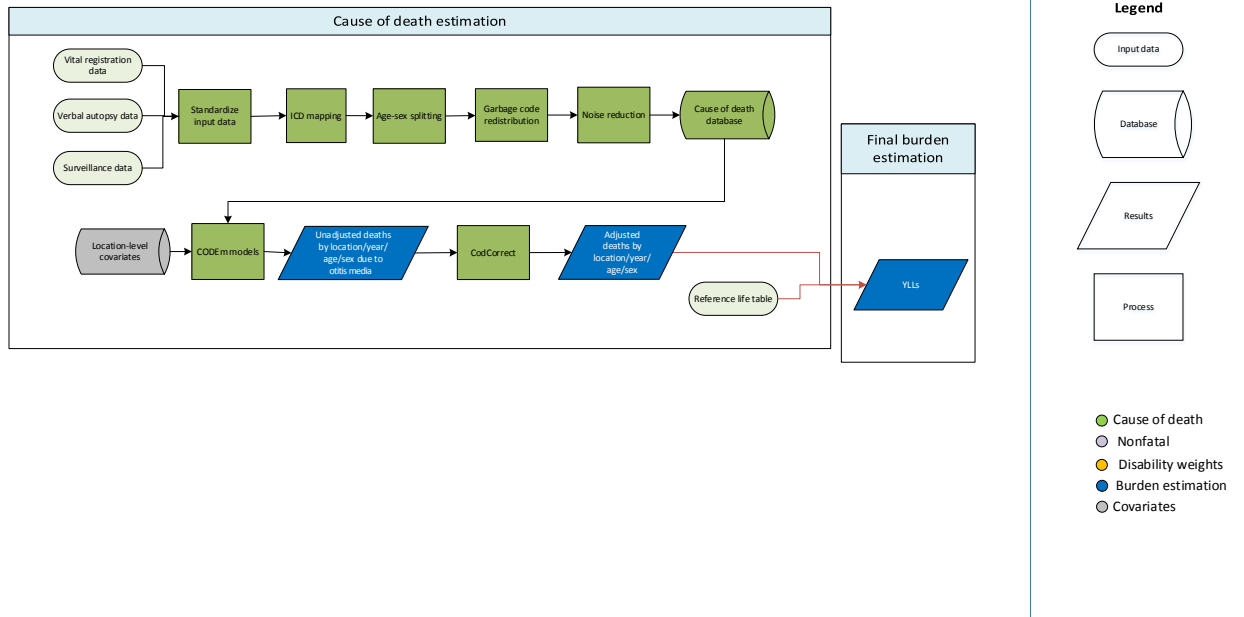

## Input data

Vital registration, verbal autopsy and surveillance data were used. We outliered data that were largely conflicting with the majority of data from other studies conducted either in the same or different countries (with similar sociodemographic characteristics) in the same region.

## Modeling strategy

A general CODEm modeling strategy was used. There were no substantive changes from GBD 2013 in terms of modeling strategy.

## Encephalitis

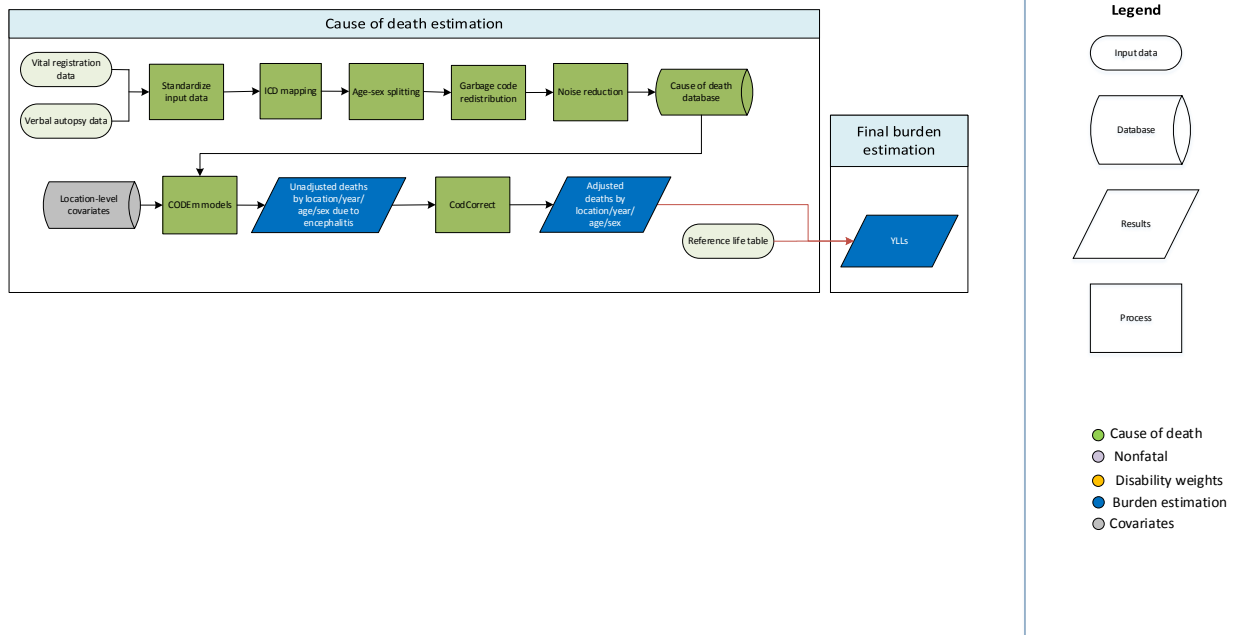

### Input data

Vital registration and verbal autopsy data were used to model this cause. We outliered data in instances where garbage code redistribution and noise reduction, in combination with small sample sizes, resulted in unreasonable cause fractions when compared to regional, super-regional, and global rates, and data that violated well-established time or age trends. Outliering methods were consistent across both vital registration and verbal autopsy data.

### Modeling strategy

We modeled deaths due to encephalitis with a standard CODEm model using the cause of death database and location-level covariates as inputs. We hybridized separate global and data-rich models to acquire unadjusted results, which were adjusted using CodCorrect to reach final years of life lost (YLLs) due to encephalitis.

In GBD 2013, the encephalitis model was modeled using two age categories – under 5 and 5 years and above – because the mortality trends differed substantially between children and adults and a significant number of data sources only had data for under-5-year-olds. With the addition of new data sources for GBD 2015, this modeling process was deemed unnecessary and the encephalitis model covered the entire age range. Another significant change was the addition of the Japanese encephalitis covariate, which is a binary covariate indicating if the location is known to be endemic for Japanese encephalitis. The covariate was modeled according to data from the Centers for Disease Control and Prevention.<sup>1</sup>



## Reference

1 Centers for Disease Control (CDC). CDC health information for international travel 2016: the yellow book. New York City, United States: Oxford University Press, USA, 2016.

# Tetanus

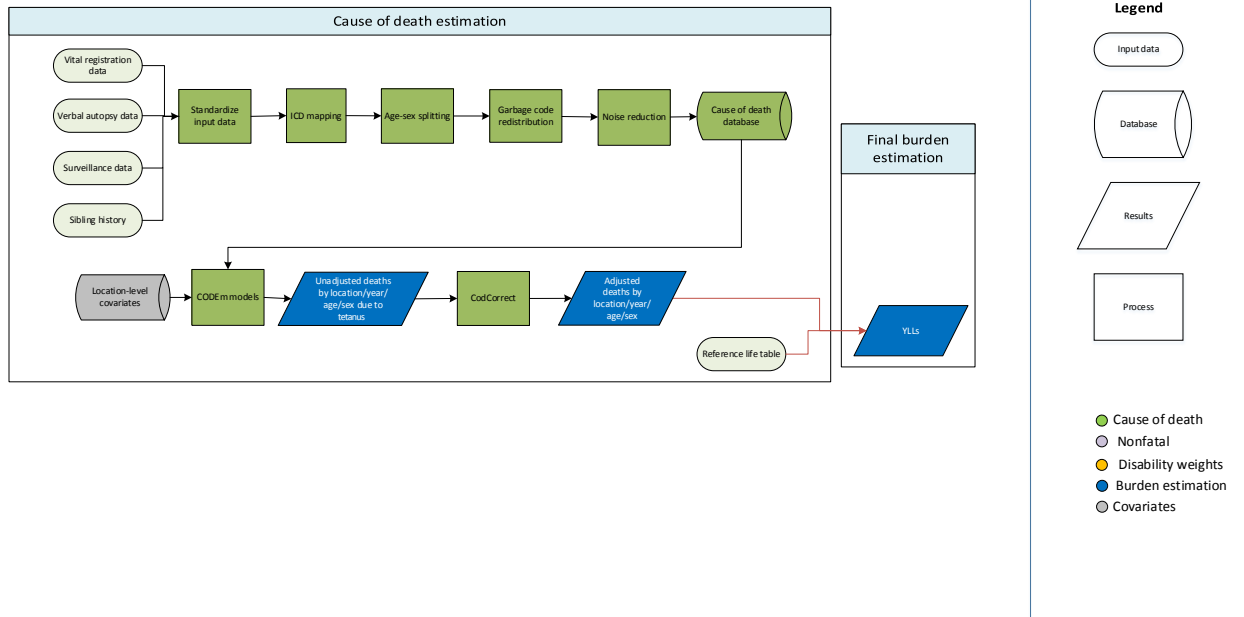

## Input data

Vital registration, verbal autopsy, sibling history, and surveillance data were used. Data were outliered if they largely conflicted with the majority of data from other studies conducted either in the same or different countries with similar sociodemographic characteristics in the same region.

## Modeling strategy

A general CODEm modeling strategy was used. We ran separate CODEm models for under 1 year and 1-80 years. There were no substantive changes from GBD 2013 in terms of modeling strategy.

## Malaria

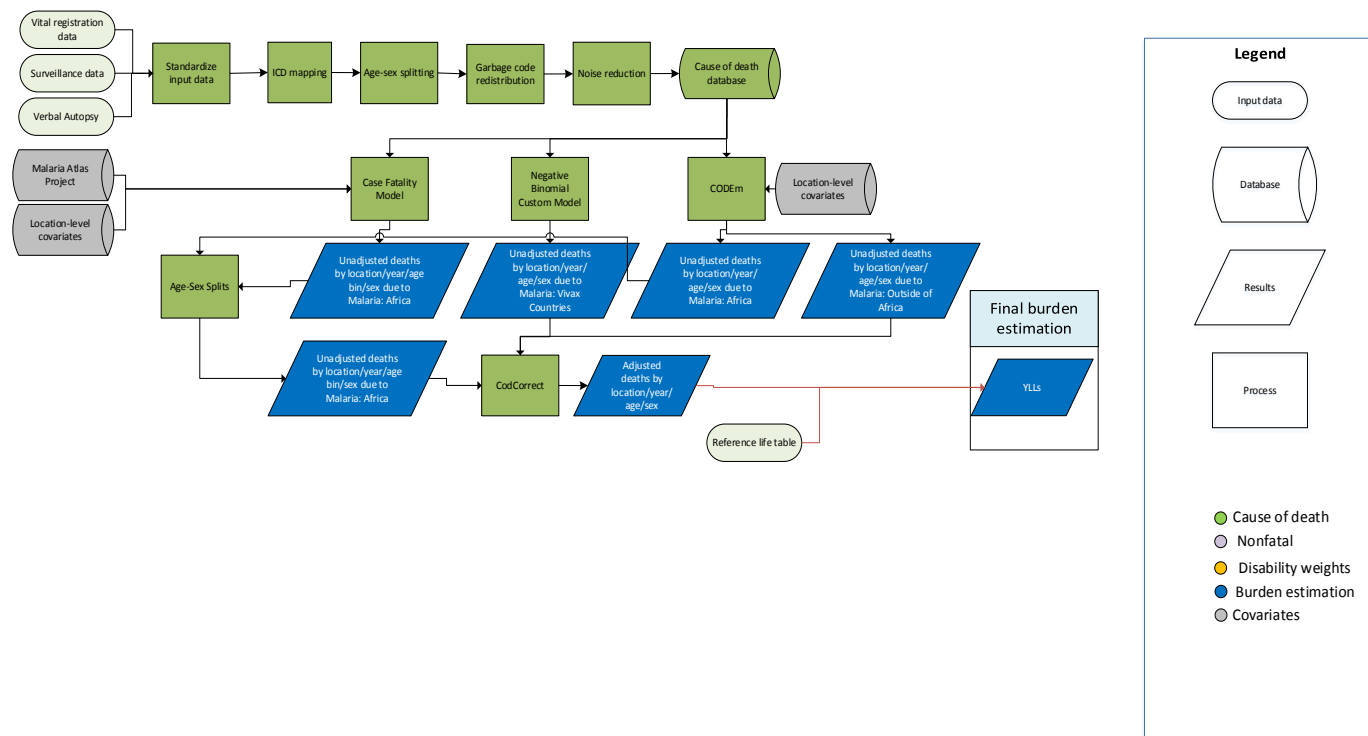

### Input data

For the Outside of Africa and *P. vivax* models, data include vital registration, verbal autopsy, and surveillance data from the cause of death (COD) database. Unlike other causes of death, we did not redistribute deaths to malaria. For the Africa models, we only used COD data (mostly verbal autopsy) where we have been able to successfully geo-reference (e.g., find latitude and longitude) the site. Systematic literature reviews for malaria were not conducted.

Our outlier criteria excluded data points that (1) were implausibly high or low relative to global or regional patterns, (2) substantially conflicted with established age or temporal patterns, or (3) significantly conflicted with other data sources conducted from the same locations or locations with similar characteristics (i.e., local Socio-Demographic Index).

Unlike other causes of death we directly used epidemiologic measures in our estimation process – whereas causes modeled with a traditional CODEm approach generally use epidemiologic measures as a covariate, if at all. We received spatio-temporal cubes of incidence in three broad age-bins (0-5, 5-14 and 15+) from 1980 to 2015 as well as time series (at the country level) estimates of any antimalarial use from the Malaria Atlas Project (MAP) at the University of Oxford. Separately, we updated our measure of drug efficacy from GBD 2013.

### Modeling strategy

As described above, the malaria modeling strategy was carried out in three parts.

For countries where the main/exclusive strain of malaria was *P. vivax*, deaths were estimated using a simple negative binomial model where the outcome is study deaths and the exposure of sample sizes. We used fixed effects on year and indicator effects for age and sex on the other side of the equation.

In locations outside of Africa, we continued to use a traditional CODEm approach. It must be noted that “outside of Africa” also includes some countries on the continent of Africa including Algeria, Egypt, Morocco, Comoros, Mauritius, Cape Verde, Sao Tome, Principe, and South Africa. Thus, our split was both a function of location (e.g., in/out Africa) as well as epidemiologic profile (significantly fewer cases and deaths). For GBD 2015, we strictly matched MAP’s designation of malarial Africa.

To estimate the fatal burden of disease due to malaria in Africa, we first used a traditional CODEm approach to generate age-patterns for later use. Relative to GBD 2013, the covariate list was significantly updated and now reflects the central role of MAP data. Specifically, we used MAP estimates of *P. falciparum* prevalence in 2- to 10-year-olds, its conversion to malaria incidence in three broad age bands, untreated incidence given antimalarial coverage and efficacy, drug efficacy, lag distributed income, health systems access, and the interaction between incidence and drug efficacy as covariates for these models.<sup>1</sup> Where appropriate, we have extracted site-specific values of these covariates which is used by CODEm to improve the accuracy at each stage.

Separately, for mortality data that were geo-referenced, we aggregated the data to match the age groups of the MAP incidence cube and then extracted the age-bin-specific incidence values. Using national-level estimates of drug efficacy and antimalarial use, we calculated untreated incidence (our denominator) where:

$$\text{Untreated incidence} = \text{incidence} * (1 - \text{antimalarial coverage} * (1 - \text{drug efficacy}))$$

Death rate was derived from the COD data and was combined with incidence in the following form as the outcome variable:  $\text{logit}(\text{death rate}/\text{untreated incidence rate})$ . We modeled logit case fatality rate (cfr) in a mixed effects regression with fixed effects on log mortality rate and sex with random effects on the site of the study. The regression was weighted using the sample size (e.g., number of deaths) in the study to recognize the relative information contributions of each data point. We ran this model separately by age bin and collated the results at the end. All regressions were run in STATA 13 (specifically using the mixed function).

Predictions of logit case fatality were made at the national level using 1,000 realizations of each model (to propagate uncertainty) while omitting the location based random effects. It was not possible to propagate covariate uncertainty. These draws were back-transformed and multiplied by national-level estimates of untreated cases to get deaths by sex and age-bin. The age-bins were subsequently split into GBD age groups by incorporating the observed cause-specific mortality pattern previously generated by the CODEm models and the underlying population pyramid.

The results from the *P. vivax*, Outside of Africa, and Africa models were collated and incorporated in the CodCorrect algorithm.

## References

- 1 Bhatt S, Weiss DJ, Cameron E, *et al.* The effect of malaria control on *Plasmodium falciparum* in Africa between 2000 and 2015. *Nature* 2015; **526**: 207–11.

## Chagas disease

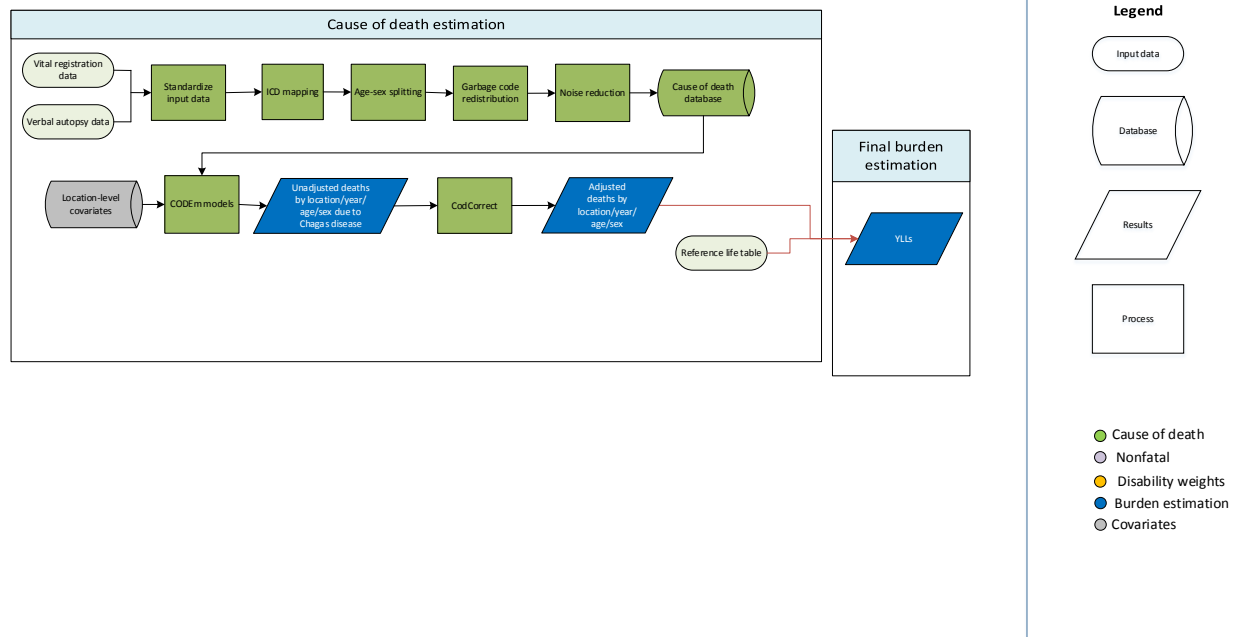

### Input data

We modeled Chagas mortality using all available data in the cause of death database. No data were outliered for this cause.

### Modeling strategy

We modeled Chagas mortality using a two-model hybrid approach: 1) a CODEm model of all Chagas-endemic countries of Latin America using all data in the CoD database; and 2) estimates of mortality from imported cases in non-endemic, data-rich countries. Where Chagas deaths were reported in non-endemic data-rich countries, we produced non-zero estimates by drawing from a beta distribution defined based on number of reported deaths and the underlying sample size. Estimates of Chagas mortality in endemic countries were drawn from the CODEm model.

We have made no substantive changes in the modeling strategy from GBD 2013 for Chagas endemic countries. We have added mortality from imported cases for GBD 2015.

# Dengue

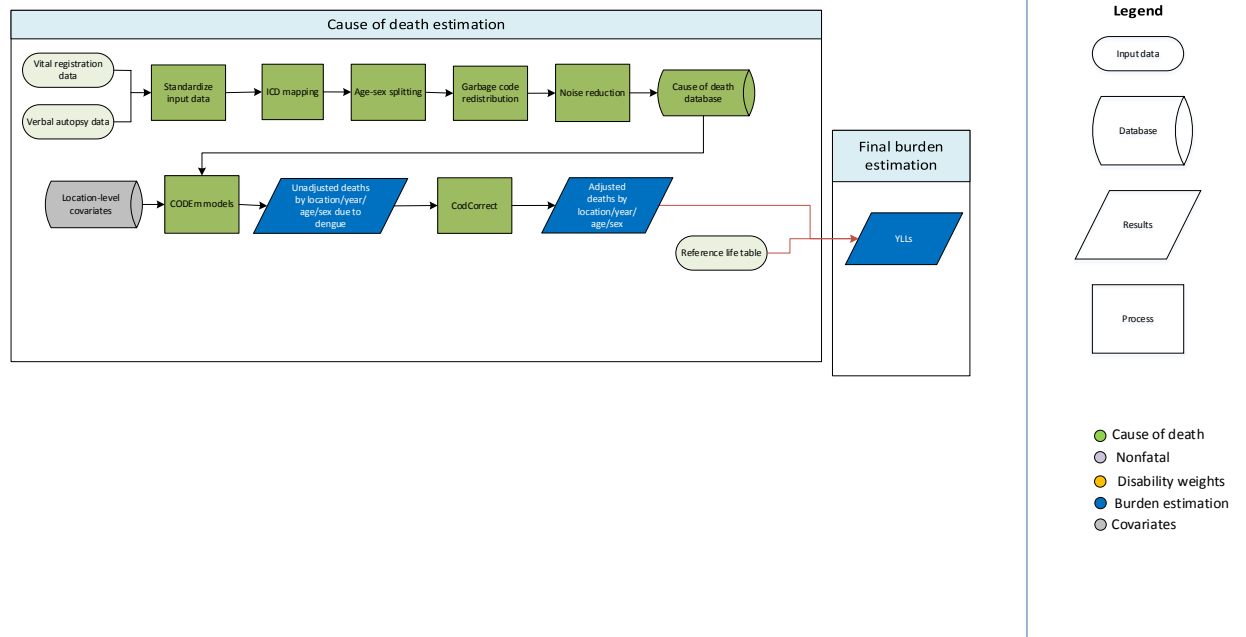

## Input data

We modeled dengue mortality using all available data in the cause of death database. Data points were outliered if they reported an improbably low number of dengue deaths (e.g., zero dengue deaths in a hyper-endemic country) or an improbably high number of dengue deaths.

## Modeling strategy

We modeled dengue mortality using three-model hybrid approach: 1) a global CODEm model of all locations, using all data in the CoD database; 2) a CODEm model restricted to data-rich countries; and 3) estimates of mortality from imported cases in non-endemic, data-rich countries. Where dengue deaths were reported in non-endemic data-rich countries, we produced non-zero estimates by drawing from a beta distribution based on number of reported deaths and the underlying sample size. Estimates of dengue mortality in endemic data-rich countries were drawn from the data rich CODEm model. Finally, estimates in other endemic countries were drawn from the global CODEm model.

The three-model hybrid approach is new for GBD 2015, and GBD 2013 used a single global CODEm model for all locations. We have also revised a covariate that we use to inform trends in dengue mortality. For GBD 2013 we used a covariate that represented anomalies in dengue case reports (i.e., standard deviations above or below the mean reported incidence for a given location). This covariate was largely intended to inform the model about epidemic years and not to inform trends. This covariate was therefore agnostic about countries and years for which no case reports were available. Based on collaborator feedback, and to fully leverage information about trends, we have updated this covariate. It is now based on a mixed-effects model of reported incidence and yields informed estimates for countries and years with no reports. The result is dramatically improved trend estimates in the current model.

## Rabies

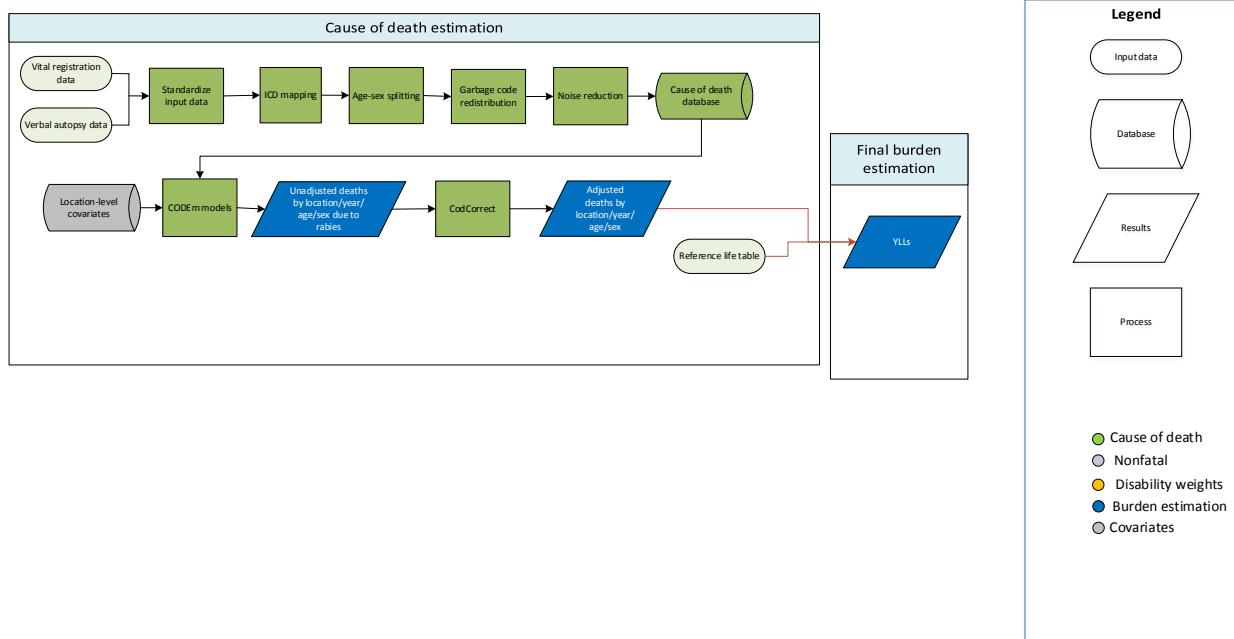

### Input data

We modeled rabies mortality using all available data in the cause of death database. Data points were outliered if they reported an improbable number of rabies deaths (e.g., zero rabies deaths in a hyper-endemic country) or if their inclusion in the model yielded distorted trends. In some cases multiple data sources for the same location differed dramatically both in their quality and reported rabies mortality (e.g., a verbal autopsy and vital registration source). In these cases the lower-quality data source was outliered.

### Modeling strategy

We modeled rabies mortality using a two-model hybrid approach: 1) a global CODEm model of all locations, using all data in the CoD database; and 2) a CODEm model restricted to data-rich countries.

We have made two substantive changes in the modeling strategy from GBD 2013. First, we have changed from a single global model to the hybrid global/data rich model approach. Second, we conducted an exploratory analysis to determine the most predictive covariates for rabies and have updated the covariates used in the CODEm model accordingly.



## Other neglected tropical diseases (NTDs)

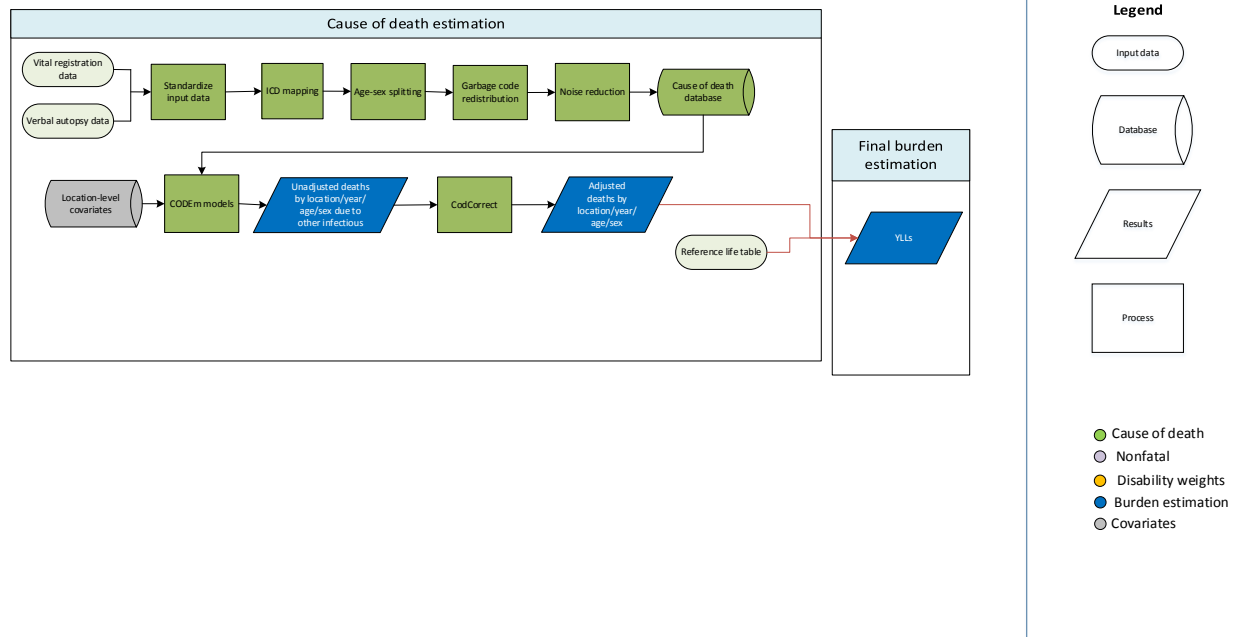

### Input data

We modeled other infectious disease mortality using all available data in the cause of death database. Data points were outliered if they reported an improbable number of deaths or if their inclusion in the model yielded distorted trends.

### Modeling strategy

We modeled other infectious disease mortality using a two-model hybrid approach: 1) a global CODEm model of all locations, using all data in the CoD database; and 2) a CODEm model restricted to data-rich countries.

Since GBD 2013 we have switched from a single global model to the hybrid global/data-rich model approach. We have otherwise made no substantive changes in the modeling strategy for other infectious disease from GBD 2013.

## Neonatal conditions

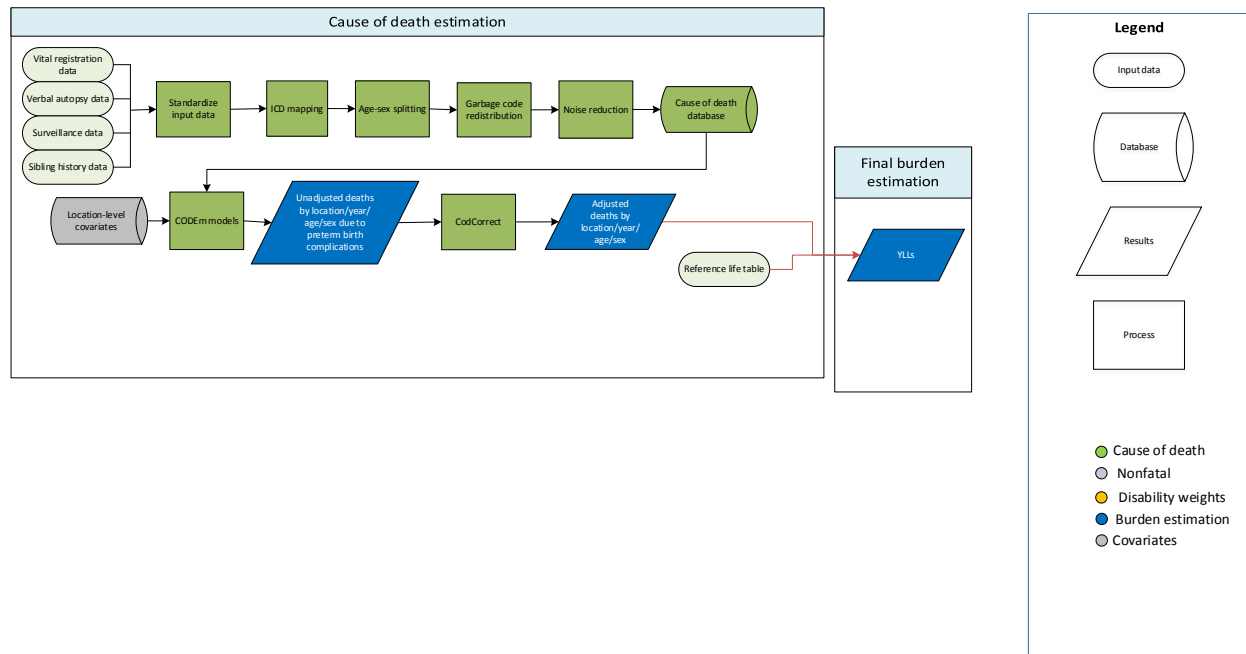

### Input data

For preterm birth complications and neonatal encephalopathy, vital registration, verbal autopsy, surveillance, and sibling history data were used to estimate number of deaths from each condition. For sepsis and other neonatal infections, vital registration, surveillance, and sibling history data were used. And for neonatal hemolytic disease and other neonatal conditions, vital registration and surveillance data were used. For all neonatal causes of death, vital registration was by far the most common data type. We only modeled deaths among males and females under age 5. Data points were selected as outliers if they were implausibly high, low, or significantly conflicted with established age or temporal patterns.

### Modeling strategy

For GBD 2013, an ensemble modeling approach was used via CODEm. The same was done for GBD 2015. In GBD 2013, we included skilled birth attendance as a covariate to account for the direct association with neonatal mortality. However, skilled birth attendance is already incorporated in the health system access covariate, which is a composite estimated using a principal component analysis of antenatal clinics, DTP3 immunization, measles immunization, in-facility delivery, and skilled birth attendance. Furthermore, skilled birth attendance and in-facility delivery are high correlated, so only one of these should be included in the model. This year, we opted to include in-facility delivery as a covariate and remove skilled birth attendance, which improved our model fits slightly.

Varying levels of data quality may have affected our results. Validation studies suggest that verbal autopsy methods tend to be less accurate for neonatal cause of death ascertainment.<sup>1-4</sup> This implies that in regions such as sub-Saharan Africa or South Asia, where the data primarily come from verbal

autopsy studies, the distribution of sub-causes within all neonatal conditions may be less accurate. Furthermore, validation studies suggest that verbal autopsy methods tend to be particularly poor at ascertaining deaths from neonatal sepsis. With this in mind, for GBD 2015 all verbal autopsy data were excluded for neonatal sepsis.

## References

- 1 Anker M, Black RE, Coldham C, *et al.* A Standard Verbal Autopsy Method for Investigating Causes of Death in Infants and Children. Geneva, Switzerland: World Health Organization Department of Communicable Disease Surveillance and Response; The Johns Hopkins School of Hygiene and Public Health; The London School of Hygiene and Tropical Medicine, 1999.
- 2 Kalter HD, Gray RH, Black RE, Gultiano SA. Validation of postmortem interviews to ascertain selected causes of death in children. *Int J Epidemiol* 1990; **19**: 380–6.
- 3 Quigley MA, Armstrong Schellenberg JR, Snow RW. Algorithms for verbal autopsies: a validation study in Kenyan children. *Bull World Health Organ* 1996; **74**: 147–54.
- 4 Snow RW, Armstrong JR, Forster D, *et al.* Childhood deaths in Africa: uses and limitations of verbal autopsies. *The Lancet* 1992; **340**: 351–5.

# Nutritional deficiencies

Nutritional deficiencies

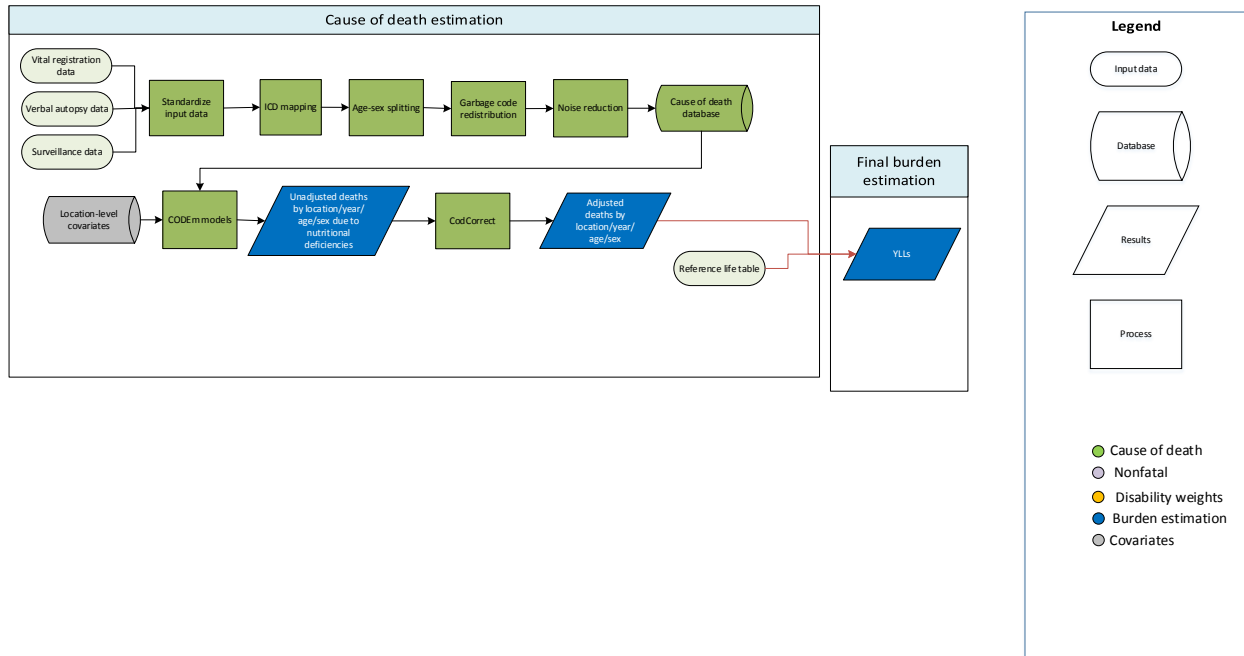

## Input data

Vital registration, verbal autopsy and surveillance data were used. We outliered data that were largely conflicting with the majority of data from other studies conducted either in the same or different countries (with similar sociodemographic characteristics) in the same region.

## Modeling strategy

We used a general CODEm strategy to model nutritional deficiencies. There were no substantive changes from GBD 2013 in terms of modeling strategy.

# Protein energy malnutrition

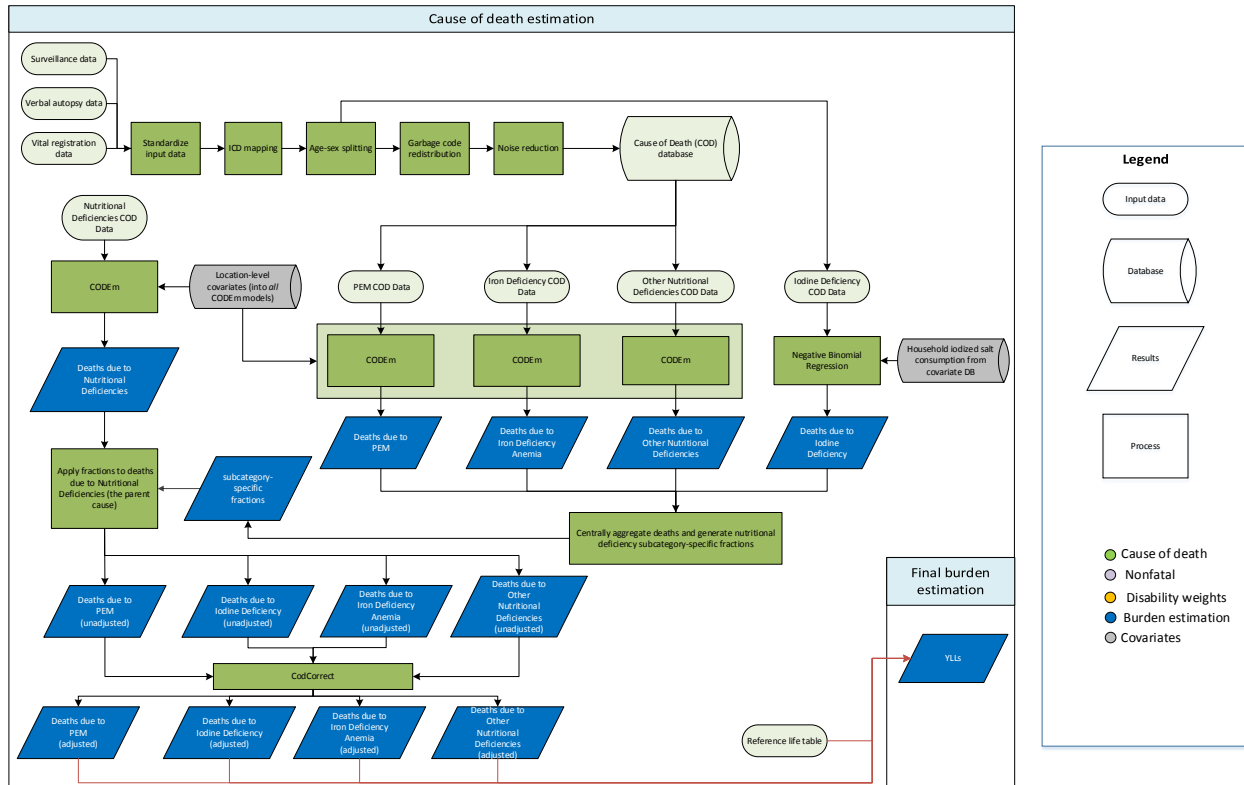

## Input data

Vital registration, verbal autopsy, and surveillance data were used. We outliered data that were largely conflicting with the majority of data from other studies conducted either in the same or different countries (with similar sociodemographic characteristics) in the same region

## Modeling strategy

We estimated mortality due to protein-energy malnutrition (PEM) in two steps. CODEm was first used to generate mortality estimates for total nutritional deficiencies. The sub-categories of nutritional deficiencies, namely, PEM, iodine deficiency, iron-deficiency anemia, and other nutritional deficiencies, were modeled separately. CODEm was used to model all sub-categories except for iodine deficiency, which we modeled using a negative binomial regression model given the small number of deaths attributable to it. Estimated deaths from four nutritional sub-categories were then aggregated centrally at the 1,000 draw level to generate cause fractions for each sub-category. These cause fractions were then applied centrally to the total nutritional deficiencies CODEm estimates to generate mortality estimates for PEM, iodine deficiency, iron-deficiency anemia, and other nutritional deficiencies, respectively.

# Iron deficiency anemia

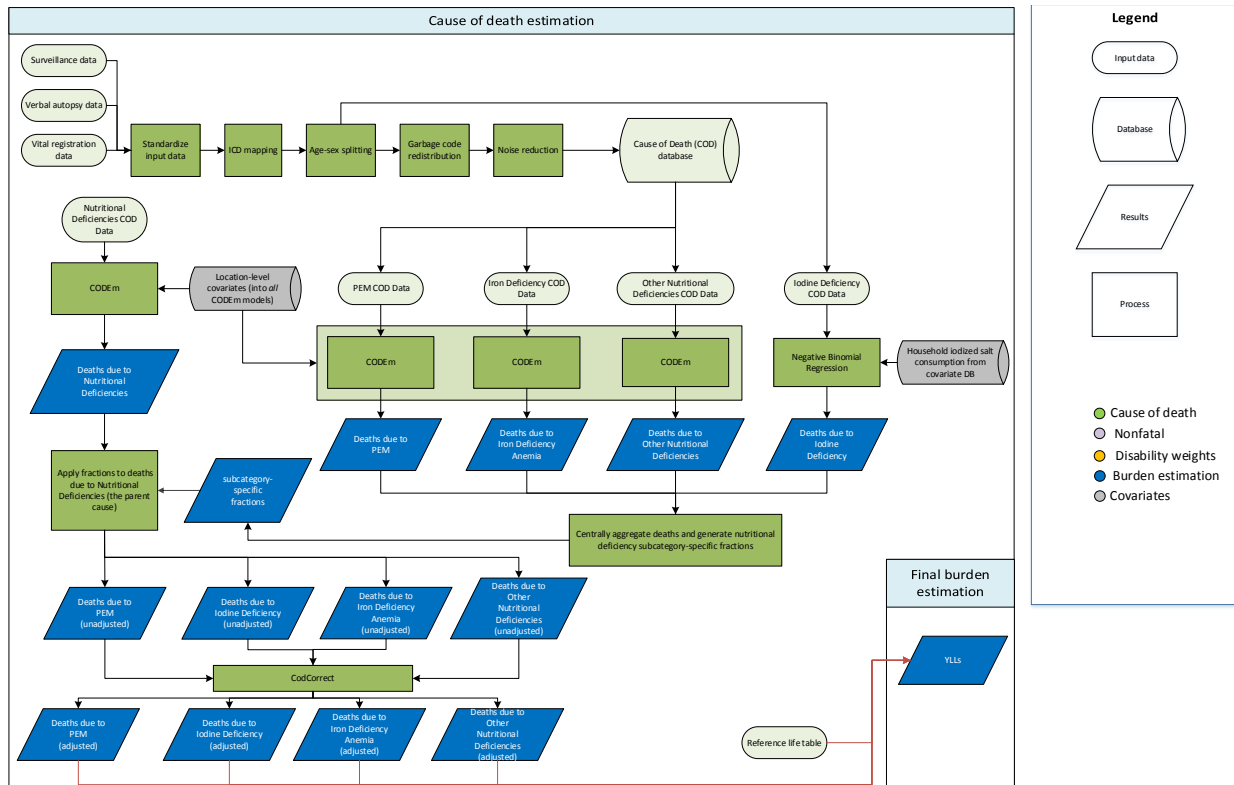

## Input data

Vital registration, verbal autopsy, and surveillance data were used. We outliered data that were largely conflicting with the majority of data from other studies conducted either in the same or different countries (with similar sociodemographic characteristics) in the same region.

## Modeling strategy

We estimated mortality due to iron-deficiency anemia in two steps. CODEm was first used to generate mortality estimates for total nutritional deficiencies. The sub-categories of nutritional deficiencies, namely protein-energy malnutrition, iodine deficiency, iron-deficiency anemia, and other nutritional deficiencies, were modeled separately. CODEm was used to model all sub-categories except for iodine deficiency, which we modeled using a negative binomial regression model given the small number of deaths attributable to it. Estimated deaths from four nutritional sub-categories were then aggregated centrally at the 1,000 draw level to generate cause fractions for each sub-category. These cause fractions were then applied centrally to the total nutritional deficiencies CODEm estimates to generate mortality estimates for protein energy malnutrition, iodine deficiency, iron-deficiency anemia, and other nutritional deficiencies respectively.

## Other nutritional deficiencies

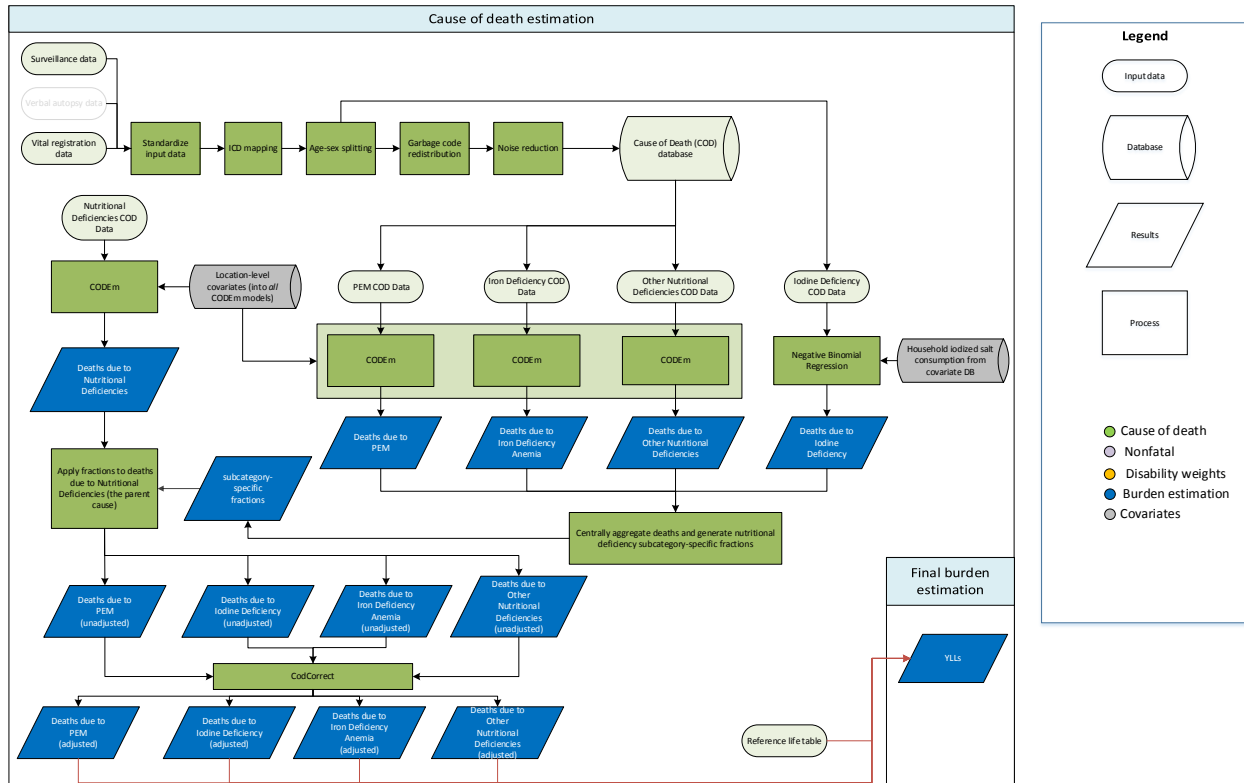

### Input data

Vital registration and surveillance data were used. We outliered data that were largely conflicting with the majority of data from other studies conducted either in the same or different countries (with similar sociodemographic characteristics) in the same region.

### Modeling strategy

We estimated mortality due to other nutritional deficiencies in two steps. CODEm was first used to generate mortality estimates for total nutritional deficiencies. The sub-categories of nutritional deficiencies, namely protein-energy malnutrition (PEM), iodine deficiency, iron-deficiency anemia, and other nutritional deficiencies, were modeled separately. CODEm was used to model all sub-categories except for iodine deficiency, which we modeled using a negative binomial regression model given the small number of deaths attributable to it. Estimated deaths from four nutritional sub-categories were then aggregated centrally at the 1,000 draw level to generate cause fractions for each sub-category. These cause fractions were then applied centrally to the total nutritional deficiencies CODEm estimates to generate mortality estimates for PEM, iodine deficiency, iron-deficiency anemia and other nutritional deficiencies, respectively.

# Hepatitis

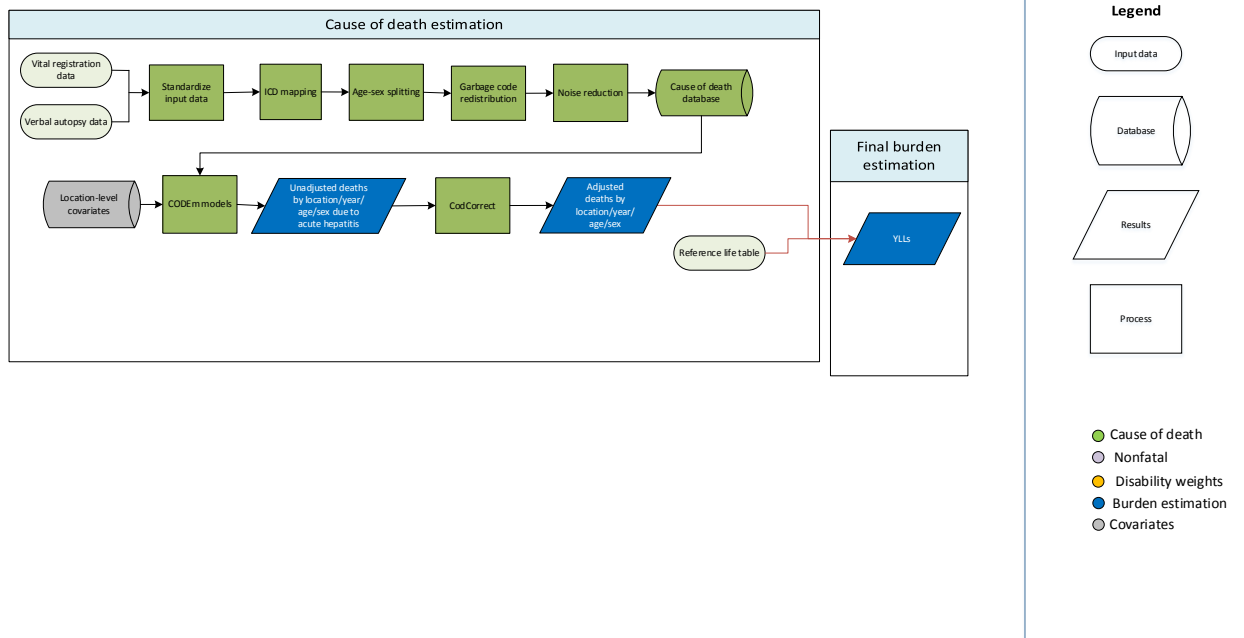

## Input data

We modeled hepatitis mortality using all available data in the cause of death database. Data points were outliered if they reported an improbable number of hepatitis deaths or if their inclusion in the model yielded distorted trends. In some cases multiple data sources for the same location differed dramatically both in their quality and reported rabies mortality (e.g., a verbal autopsy and vital registration source). In these cases the lower-quality data source was outliered.

## Modeling strategy

We modeled hepatitis mortality using a two-model hybrid approach: 1) a global CODEm model of all locations, using all data in the CoD database; and 2) a CODEm model restricted to data-rich countries. Since GBD 2013 we have switched from a single global model to the hybrid global/data-rich model approach. We have otherwise made no substantive changes in the modeling strategy for hepatitis from GBD 2013.



## Other Infectious Diseases

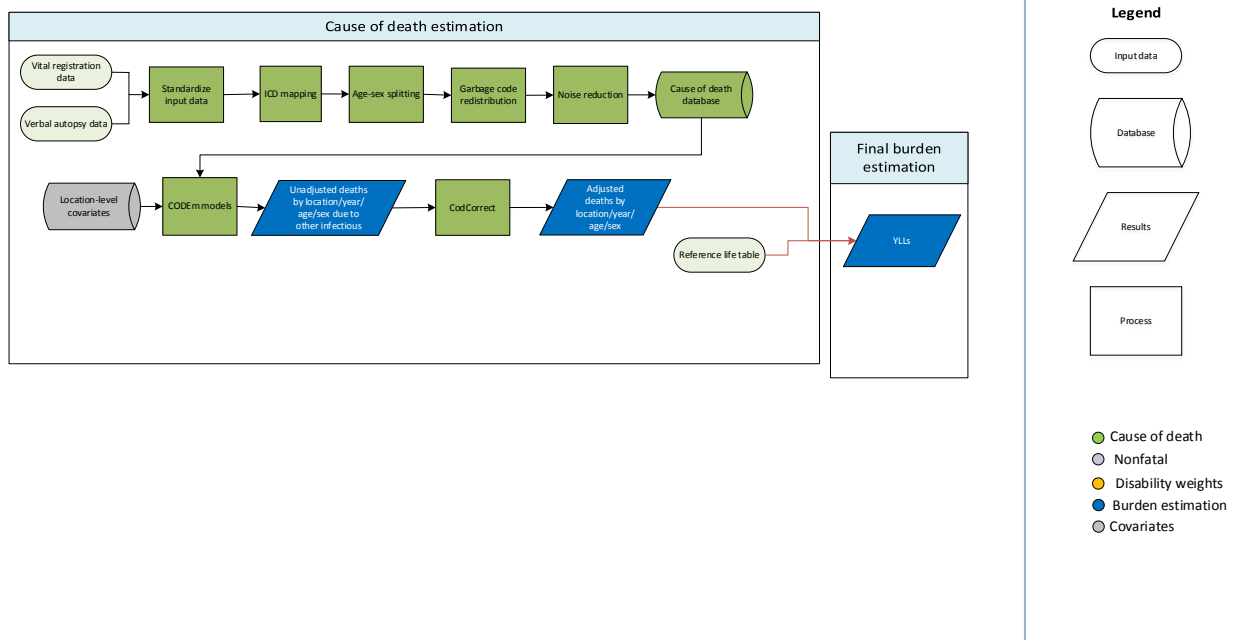

### Input data

We modeled other infectious disease mortality using all available data in the cause of death database. Data points were outliered if they reported an improbable number of deaths or if their inclusion in the model yielded distorted trends.

### Modeling strategy

We modeled other infectious disease mortality using a two-model hybrid approach: 1) a global CODEm model of all locations, using all data in the CoD database; and 2) a CODEm model restricted to data-rich countries.

Since GBD 2013 we have switched from a single global model to the hybrid global/data-rich model approach. We have otherwise made no substantive changes in the modeling strategy for other infectious disease from GBD 2013.

## Cancers

Input data and methodological summary for all cancers except for liver cancer and non-melanoma skin cancer

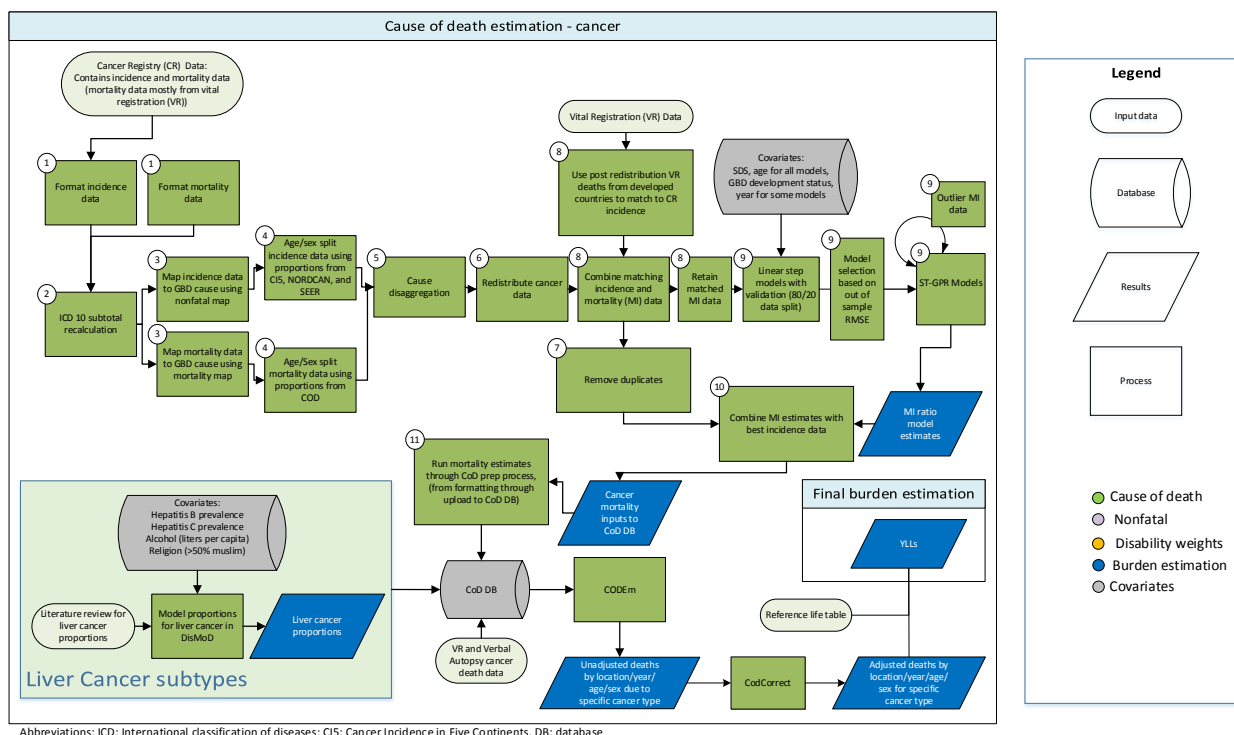

## Data

The Cause of Death (COD) database contains multiple sources of cancer mortality data. These sources include vital registration, verbal autopsy, and cancer registry data. The cancer registry mortality estimates that are uploaded into the COD database stem from cancer registry incidence data that have been transformed to mortality estimates through the use of mortality-to-incidence (MI) ratios.

### Data seeking processes

Cancer mortality data in the cause of death database other than cancer registry data

Sources for cancer mortality data other than cancer registry data are described in the COD database description (Part 2).

### Cancer registry data

All cancer registry data used for GBD 2010 were also included for GBD 2013, and the majority of these data were also used for GBD 2015 unless superseded by newer data (see step 7 in flow chart and below). Most new data were added based on availability and collaborator recommendation. Some new data were acquired and approved for GBD 2013 but were received after the deadline for adding new data to GBD 2013. More than half (56%) of the final incidence data and 35% of the final MI model input data came from the Cancer Incidence in Five Continents series (CI5).<sup>1-10</sup>

Cancer registry data were most often downloaded from a publicly available webpage or provided by collaborators. Most cancer registries only report cancer incidence. However, if a cancer registry also reported cancer mortality, mortality data were also extracted from the source to be used in the mortality-to-incidence estimation.

#### Inclusion and exclusion criteria

Only population-based cancer registries were included, and only those that included all cancers (no specialty registries), data for all age groups, and data for both sexes. Pathology-based cancer registries were included if they had a defined population. Hospital-based cancer registries were not included.

Cancer registry data were excluded from either the final incidence data input or the MI model input if a more detailed source (e.g., providing more detailed age or diagnostic groups) was available for the same population. Preference was given to registries with national coverage over those with only local coverage, except those from countries where the GBD study provides subnational estimates; thus some data were excluded because newly acquired national registry data could replace a regionally representative predecessor.

Data were excluded from the final incidence data input if the coverage population was unknown.

#### Bias of categories of input data

Cancer registry data can be biased in multiple ways. A high proportion of ill-defined cancer cases in the registry data requires redistribution of these cases to other cancers, which introduces a potential for bias. Changes between coding systems can lead to artificial differences in disease estimates; however, we adjust for this bias by mapping the different coding systems to the GBD causes. Underreporting of cancers that require advanced diagnostic techniques (e.g., leukemia and brain, pancreatic, and liver cancer) can be an issue in cancer registries from low-income countries. On the other hand, misclassification of metastatic sites as primary cancer can lead to overestimation of cancer sites that are common sites for metastases like brain or liver. Since many cancer registries are located in urban areas, the representativeness of the registry for the general population can also be problematic. The accuracy of mortality data reported in cancer registries usually depends on the quality of the vital registration system. If the vital registration system is incomplete or of poor quality, the mortality-to-incidence ratio can be biased to lower ratios.

## Methods

Overall methodological process

See cancer flowchart.

Steps of analysis and data transformation processes

Cancer registry data went through multiple processing steps before integration with the COD database. First, the original data were transformed into standardized files, which included standardization of format, categorization, and registry names (#1 in flowchart).

Second, some cancer registries report individual codes as well as aggregated totals [e.g., C18, C19, and C20 are reported individually but the aggregated group of C18-C20 (colorectal cancer) is also reported in the registry data]. The data processing step “subtotal recalculation” (#2 in flowchart) verifies these totals and subtracts the values of any individual codes from the aggregates.

In the third step (#3 in the flowchart), cancer registry incidence data and cancer registry mortality data are mapped to GBD causes. A different map is used for incidence and for mortality data because of the assumption that there are no deaths for certain cancers. One example is basal cell carcinoma of the skin. In the cancer registry incidence data, basal cell carcinoma is mapped to non-melanoma skin cancer (basal cell carcinoma). However, if basal cell skin cancer is recorded in the cancer registry mortality data, the deaths are instead mapped to non-melanoma skin cancer (squamous cell carcinoma) under the assumption that they were indeed misclassified squamous cell skin cancers. Other examples are benign or in situ neoplasms. Benign or in situ neoplasms found in the cancer registry incidence dataset were simply dropped from that dataset. The same neoplasms reported in a cancer registry mortality dataset were mapped to the respective invasive cancer (e.g., melanoma in situ in the cancer registry incidence dataset was dropped from the dataset; melanoma in situ in the cancer registry mortality dataset was mapped to melanoma).

In the fourth data processing step (#4 in the flowchart) cancer registry data were standardized to the GBD age groups. Age-specific incidence rates were generated using CI5, SEER, and NORDCAN data, while age-specific mortality rates were generated from the CoD data through a method described in Part 2. Age-specific weights were then generated by applying the age-specific rates to a given registry population that required age-splitting to produce the expected number of cases/deaths for that registry by age. The expected number of cases/deaths for each sex, age, and cancer were then normalized to 1, creating final, age-specific proportions. These proportions were then applied to the total number of cases/deaths by sex and cancer to get the age-specific number of cases/deaths.

In the rare case that the cancer registry only contained data for both sexes combined, the now-age-specific cases/deaths were split and re-assigned to separate sexes using the same weights that are used for the age-splitting process. Starting from the expected number of deaths, proportions were generated by sex for each age (e.g., if for ages 15 to 19 years old there are six expected deaths for males and four expected deaths for females, then 60% of the combined-sex deaths for ages 15-19 years would be assigned to males and the remaining 40% would be assigned to females).

In the fifth step (#5 in the flowchart) data for cause entries that are aggregates of GBD causes were redistributed. Examples of these aggregated causes include some registries reporting ICD10 codes C00-C14 together as, “lip, oral cavity, and pharyngeal cancer.” These groups were broken down into sub-causes that could be mapped to single GBD causes. In this example, those include lip and oral cavity cancer (C00-C08), nasopharyngeal cancer (C11), cancer of other parts of the pharynx (C09-C10, C12-C13), and “Malignant neoplasm of other and ill-defined sites in the lip, oral cavity, and pharynx” (C14). To redistribute the data, weights were created using the same “rate-applied-to-population” method employed in age-sex splitting (see step four above). For the undefined code (C14 in the example) an “average all cancer” weight was used, which was generated by adding all cases from SEER/NORDCAN/CI5 and dividing the total by the combined population. Then, proportions were

generated by sub-cause for each aggregate cause as in the sex-splitting example above (see step four). The total number of cases from the aggregated group (C00-C14) was then recalculated for each subgroup and the undefined code (C14). C14 was then redistributed as a “garbage code” in step six. Distinct proportions were used for C44 (non-melanoma skin cancer) and C46 (Kaposi’s sarcoma). Population data were not used to redistribute data for these ICD codes. Non-melanoma skin cancer processing is described under section “Input data and methodological summary for non-melanoma skin cancer (squamous-cell carcinoma).” C46 entries were redistributed as “other cancer,” HIV, and C80 (other and unknown cancers) using proportions described in Part 2.

In the sixth step (#6 in the flowchart) unspecified codes (“garbage codes”) were redistributed. Redistribution of cancer registry incidence and mortality data mirrored the process of the redistribution used in the cause of death database (Part 2).

In the seventh step (#7 in the flowchart) duplicate or redundant sources were removed from the processed cancer registry dataset. Duplicate sources were present if, for example, the cancer registry was part of the CI5 dataset but we also had data from the registry directly. Redundancies occurred and were removed as described in “Inclusion and Exclusion Criteria,” where more detailed data were available, or when national registry data could replace regionally representative data. From here, two parallel selection processes were run to generate input data for the MI models and to generate incidence for final mortality estimation. Higher priority was given to registry data from the most standardized source when creating the final incidence input (generally CI5 data), whereas preference was given to registry data from sources with matching mortality and incidence for the MI model input (in order to reduce confounding due to oppositional input biases when matching the two data types).

In the eighth step (#8 in the flowchart) the processed incidence and mortality data from cancer registries were matched by cancer, age, sex, year, and location to generate MI ratios. Because some cancer registries do not report mortality data – even though high-quality vital registration system data are available to the registry’s coverage area – processed vital registration mortality data from the CoD database were matched to the registry’s incidence data for some countries. This was the case for certain registries in the following countries: Australia, Austria, Belgium, Bulgaria, Denmark, Estonia, Finland, Hungary, Iceland, Ireland, New Zealand, Norway, South Korea, and Switzerland.

The ninth step involved creating and selecting the MI models. All models were run separately by cancer, and the best model was selected from the following list (see Table below).

1.  $\text{logit}(MI\ ratio_{c,a,s,t}) = \alpha + \beta_1 SDS_{c,t} + \sum_a^A \beta_2 I_a + \beta_3 I_S + \theta_c + \epsilon_{c,a,s,t}$
2.  $\text{logit}(MI\ ratio_{c,a,s,t}) = \alpha + \beta_1 SDS_{c,t} + \sum_a^A \beta_2 I_a + \beta_3 I_S + \beta_4 t + \theta_c + \epsilon_{c,a,s,t}$
3.  $\text{logit}(MI\ ratio_{c,a,s,t}) = \alpha + \beta_1 SDS_{c,t} + \sum_a^A \beta_2 I_a + \beta_3 I_S + \beta_4 DS + \theta_c + \epsilon_{c,a,s,t}$
4.  $\text{logit}(MI\ ratio_{c,a,s,t}) = \alpha + \beta_1 SDS_{c,t} + \sum_a^A \beta_2 I_a + \beta_3 I_S + \beta_4 DS + \beta_5 t + \theta_c + \epsilon_{c,a,s,t}$
5.  $\text{logit}(MI\ ratio_{c,a,s,t}) = \alpha + \beta_1 SDS_{c,t} + \sum_a^A \beta_2 I_a + \beta_3 I_S + \theta_c + \lambda_{SR}(SDS_{c,t}) + \beta_4 t + \epsilon_{c,a,s,t}$
6.  $\text{logit}(MI\ ratio_{c,a,s,t}) = \alpha + \beta_1 SDS_{c,t} + \sum_a^A \beta_2 I_a + \beta_3 I_S + \theta_c + \lambda_{SR}(SDS_{c,t}) + \epsilon_{c,a,s,t}$
7.  $\text{logit}(MI\ ratio_{c,a,s,t}) = \alpha + \beta_1 SDS_{c,t} + \sum_a^A \beta_2 I_a + \beta_3 I_S + \theta_c + \lambda_{SR}(SDS_{c,t}) + \beta_4 DS + \epsilon_{c,a,s,t}$
8.  $\text{logit}(MI\ ratio_{c,a,s,t}) = \alpha + \beta_1 SDS_{c,t} + \sum_a^A \beta_2 I_a + \beta_3 I_S + \theta_c + \lambda_{SR}(SDS_{c,t}) + \beta_4 t + \beta_5 DS + \epsilon_{c,a,s,t}$

c: country; a: age group; t: time (years); s: sex

I: indicator variable

DS: binary variable for development status

$\theta_c$ : random effect by country (intercept)

$\lambda_{SR}(SDSc, t)$ : random effect modifier between SDI and super-region (slope)

$\epsilon_{c,a,s,t}$ : error term

#### Table: MI models

All models were tested at multiple stages before creating the final model output. Models were initiated with an SDI covariate (Socio-Demographic Index) and first tested using the complete input dataset (Part 4). If after that initial test the SDI covariate's coefficient was negative (as expected), the next step was to outlier any data point for which the residual from the prediction was greater than three times the MAD from the mean residual. Next, data were marked as outliers due to a random effect criterion: if the country-level random effect for a lower-income country was lower than the random effect for the USA, all data points for that country were marked as outliers. This process was run iteratively until all lower-income countries had country-level random effects greater than that of the USA. All data points marked outliers were dropped from the final dataset, and that dataset was used to create the final model predictions.

If the SDI coefficient was found to be positive (unexpected) after the initial SDI test, it was assumed to indicate an excess of unrealistic data in the input dataset. To remove these unrealistic data, SDI was temporarily removed from the model formula. The model proceeded as above without SDI until all unrealistic data points were removed and the SDI coefficient was found to be negative. Unrealistic data were marked as outliers using the same residual MAD and random effect methodology described above. Once SDI was established as negative (expected) the model proceeded as usual.

To select the best model formula, the initial model results were tested by comparing mean MI predictions and the mean root-mean-squared error (RMSE) values of 10 random samples of 80%/20% splits from the input dataset. Mean MI predictions were compared between developing and developed countries. Models were eliminated if the mean MI for developing countries was lower than the mean MI ratio for developed countries. For RMSE testing, the dataset was split into an 80% dataset for model development and a 20% dataset for model testing. The process was repeated 10 times. The best model for each cancer was selected based on the lowest mean out-of-sample RMSE from those models remaining after checking the mean MI. The table below contains the final models selected for each cancer.

| Cancer             | Final model number<br>(see numbering above) |
|--------------------|---------------------------------------------|
| Ovarian cancer     | 1                                           |
| Uterine cancer     | 1                                           |
| Gallbladder cancer | 1                                           |
| Kidney cancer      | 1                                           |

|                                                    |   |
|----------------------------------------------------|---|
| Larynx cancer                                      | 1 |
| Acute lymphoid leukemia                            | 1 |
| Chronic myeloid leukemia                           | 1 |
| Lip and oral cavity cancer                         | 1 |
| Pancreatic cancer                                  | 1 |
| Hodgkin lymphoma                                   | 2 |
| Acute myeloid leukemia                             | 2 |
| Chronic lymphoid leukemia                          | 2 |
| Malignant skin melanoma                            | 2 |
| Bladder cancer                                     | 3 |
| Brain and nervous system cancer                    | 3 |
| Esophageal cancer                                  | 3 |
| Tracheal, bronchus, and lung cancer                | 3 |
| Mesothelioma                                       | 3 |
| Multiple myeloma                                   | 3 |
| Other cancer                                       | 3 |
| Prostate cancer                                    | 4 |
| Testicular cancer                                  | 4 |
| Breast cancer                                      | 4 |
| Colorectal cancer                                  | 4 |
| Leukemia                                           | 4 |
| Liver cancer                                       | 4 |
| Non-Hodgkin lymphoma                               | 4 |
| Non-melanoma skin cancer (squamous cell carcinoma) | 4 |
| Stomach cancer                                     | 4 |
| Nasopharynx cancer                                 | 6 |
| Cervical cancer                                    | 7 |
| Other pharynx cancer                               | 8 |
| Thyroid cancer                                     | 8 |

Table: Final model selections

Once the best models were selected, data points were manually outliered based on the results of the first run of the model algorithm. Data points were outliered if they clearly influenced the model in an unrealistic way. For example, a data point was marked as an outlier if it created a single-year, single-age-group spike in model predictions. This was mainly the case in countries with a small number of cases or deaths, or in age groups with small numbers of cases or deaths. Manual outliers were removed from the input dataset prior to initiating the second run of the model algorithm.

After best models were selected, all final outliers were dropped from the data input, and final linear predictions were created, the final linear predictions and residuals were used as input for space-time smoothing. Space-time smoothing is a spatiotemporal regression to smooth residuals over space, time, and age.<sup>11-13</sup> The weighted residuals were added to the linear model predictions and used as priors for

the third stage, a Gaussian process regression (GPR) implementing a Matern covariance function.<sup>13–18</sup> GPR is a nonparametric technique for interpolating non-linear trends that has been used extensively in the estimation of time series data. Final MI ratio predictions with 95% uncertainty intervals were obtained by back-transforming 1,000 draws from the posterior distribution.

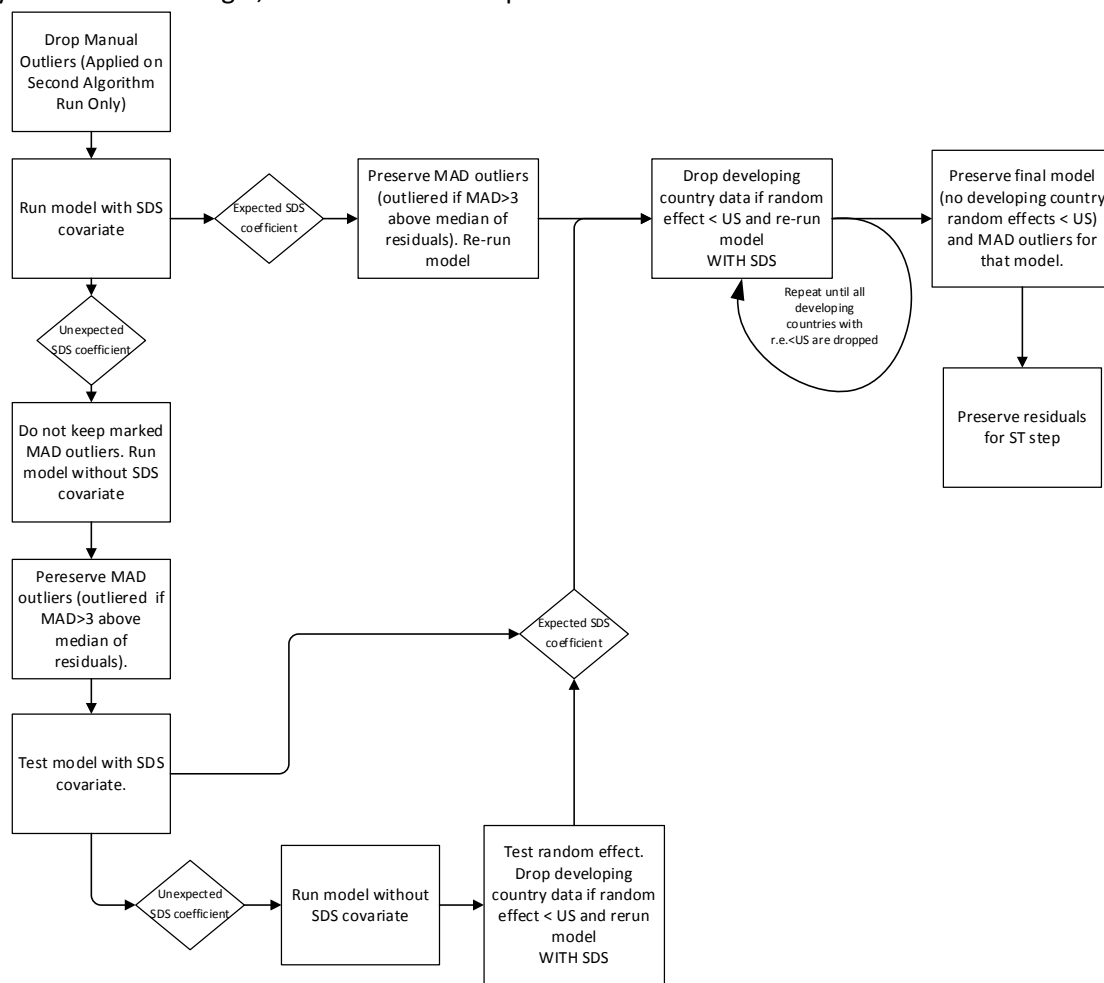

Figure: MI model estimation algorithm

Step 9 has undergone a revision compared to GBD 2010 and GBD 2013. In GBD 2010 and GBD 2013 only one model was used to predict all MI ratios, whereas for GBD 2015 we generated multiple models and chose a best model based on out-of-sample validation. Another major difference is that LDI (lagged distributed income) was used as a covariate in previous versions and was replaced by SDI for GBD 2015.

Final MI ratios were matched with the cancer registry incidence dataset in the ninth step (#10 in the flowchart) to generate mortality estimates (Incidence \* Mortality/Incidence = Mortality). The final mortality estimates were then uploaded into the COD database (#11 in the flowchart).

After transforming cancer registry incidence data to mortality estimates, the modeling strategy followed the general CODEm process as described in Part 3.



## Results

### Interpretation of results

Cancer mortality estimates for GBD 2015 can differ from the GBD 2013 results for multiple reasons. First, compared to GBD 2013 more cancer mortality data were added to the cause of death database. Second, we added sources for cancer registry data, which were transformed into mortality estimates by using the MI ratio. Third, mapping of cancer ICD codes to the GBD cancer causes was updated slightly based on collaborator comments. One example is that mapping for the ICD10 code D46 (myelodysplastic syndrome) was changed from “other cancer” to “undefined cancer” for later redistribution to non-Hodgkin lymphoma and leukemia. The one major mapping change was the addition of subtypes for leukemia and non-melanoma skin cancer. Fourth, the method to redistribute undefined causes of death or undefined cancers changed compared to GBD 2013. Models for redistribution are now performed regionally rather than by super-region. Fifth, we updated and refined the mortality-to-incidence ratio estimation compared to GBD 2013. Whereas for GBD 2010 and GBD 2013 a single model was used to estimate the MI ratios for each location, by cancer, sex, and age, we developed multiple plausible models for GBD 2015 and chose the best model based on out-of-sample validation. Sixth, we reviewed the covariate inputs for the CODEm models and changed covariates when updated or improved covariates were available. Seventh, many covariates used in CODEm models were updated for GBD 2015 (Part 4).

The other group producing country-level cancer mortality estimates is the International Agency for Research on Cancer (IARC) with their GLOBOCAN database. Significantly different methods between the GBD study and GLOBOCAN can lead to differences in results. Whereas estimates in GLOBOCAN are based on the assumption that there are “In theory, [...] as many methods as countries,”<sup>19</sup> the cancer estimation process for the GBD study follows a coherent, well-documented method for all cancers, which allows cross-validation of models as well as determination of uncertainty. Another major difference is the ability in the GBD study to adjust single cause estimates to the all-cause mortality, which is being determined independently. This also allows us to adjust individual causes of death to the all-cause mortality envelope which permits us to correct for the underdiagnosis of cancer in countries with inadequate diagnostic resources. Redistribution of a fraction of undefined causes of death to certain cancers is another methodical advantage the GBD study has over GLOBOCAN, and estimates for cancer mortality can therefore differ substantially in countries with a large proportion of undefined causes of deaths in their vital registration data or a large proportion of undefined cancer cases in their cancer registry data.

### Limitations

There are certain limitations to consider when interpreting the GBD mortality cancer estimates. First, even though every effort is made to include the most recently available data for each country, data-seeking resources are not limitless and new data cannot always be accessed as soon as they are made available. It is therefore possible that the GBD study does not include all available data sources for cancer incidence or cancer mortality. Second, different redistribution methods can potentially change the cancer estimates substantially if the data sources used for the estimated location contain a large number of undefined causes; however, neglecting to account for these undefined deaths would likely

introduce an even greater bias in the disease estimates. Third, using mortality-to-incidence ratios to transform cancer registry incidence data to mortality estimates requires accurate MI ratios. For GBD 2015 the methodology to estimate MI ratios was improved with development of multiple different models and implementation of model cross-validation, but the method is still sensitive to underdiagnosis of cancer cases or underascertainment of cancer deaths. However, given that the majority of data used for the cancer mortality estimation come from vital registration data and not cancer registry data this is not a major limitation.

## Non-melanoma skin cancer (squamous-cell carcinoma)

### Data

#### Data seeking processes

The input data were identified and processed using the same methods as all other cancers described above.

#### Inclusion and exclusion criteria

Inclusion and exclusion criteria followed the same methods as described for other cancers (see above).

#### Bias of categories of input data

The potential biases of the input data are the same as for other cancers (see above).

### Methods

#### Overall methodological process

The GBD produces estimates for non-melanoma skin cancer via two subgroups: non-melanoma skin cancer (basal cell carcinoma) and non-melanoma skin cancer (squamous cell carcinoma). While some cancer registries report non-melanoma skin cancer at the four- or five- digit level required to distinguish between the subtypes (e.g. "C44.01" vs. "C44.02", "173.01" vs. "173.02"), most registries report these cancers at the three-digit level as "C44" or "173" ("Other and unspecified malignant neoplasm of skin"). Because of this, those incident cases that were reported at this three-digit level were split to "basal cell carcinoma" and "squamous cell carcinoma" based on proportions reported by Karagas et al during the cause disaggregation step (step #5 in the flowchart).<sup>20</sup> Since mortality estimates are produced for squamous cell carcinoma under the assumption that basal cell carcinoma causes almost no deaths, all mortalities reported as "C44" or "173" were simply mapped to the "squamous cell carcinoma" GBD cause. Apart from this additional step for some incident cases, the remainder of the cancer registry processing was the same as for other cancers as described above.

#### Steps of analysis and data transformation processes

Non-melanoma skin cancer (squamous cell carcinoma) mortality estimation followed the same steps as the other cancers (see flowchart and description above) except for step #5 in the flowchart as described above.

#### Model selection

The modeling strategy for non-melanoma skin cancer (squamous cell carcinoma) followed the general CODEm process.

Model performance and sensitivity

The modeling performance and sensitivity for non-melanoma skin cancer (squamous cell carcinoma) mirrored that of the general CODEm process.

Uncertainty intervals

Uncertainty was determined using standard CODEm methodology.

## Results

Interpretation of results

Non-melanoma skin cancer mortality estimates are not available from other sources. GLOBOCAN, for example, does not report deaths due to non-melanoma skin cancer. Even though the data availability for non-melanoma skin cancer is poor, the fact that it is the most common incident cancer with rates expected to rise makes it a necessity to include the disease in the GBD framework.

### <sup>4-13</sup>Limitations

Cancer registry data for non-melanoma skin cancer incidence have to be interpreted with caution due to a substantial amount of underreporting or rules that only the first non-melanoma skin cancer has to be registered. Many cancer registries therefore do not include non-melanoma skin cancers at all. For vital registration data we make the assumption that there are no deaths due to non-melanoma skin cancer (basal cell carcinoma), therefore all deaths attributed to basal cell carcinoma were included instead as squamous cell carcinoma. Based on collaborator recommendations we will test this assumption formally for GBD 2016.

## References

- 1 Cancer Incidence in Five Continents.Vol I. Geneva, Switzerland: Union Internationale Contre le Cancer, 1966.
- 2 Cancer Incidence in Five Continents.Vol II. Geneva, Switzerland: Union Internationale Contre le Cancer, 1970.
- 3 Cancer Incidence in Five Continents.Vol III. Lyon, France: IARC, 1976.
- 4 Cancer Incidence in Five Continents.Vol IV. Lyon, France: IARC, 1982.
- 5 Cancer Incidence in Five Continents.Vol V. Lyon, France: IARC, 1987.
- 6 Cancer Incidence in Five Continents.Vol VI. Lyon, France: IARC, 1992.
- 7 Cancer Incidence in Five Continents.Vol VII. Lyon, France: IARC, 1997.
- 8 Cancer Incidence in Five Continents.Vol VIII. Lyon, France: IARC, 2002.

- 9 Cancer Incidence in Five Continents.Vol IX. Lyon, France: IARC, 2007.
- 10 Cancer Incidence in Five Continents.Vol X. Lyon, France: IARC, 2013.
- 11 Wang H, Liddell CA, Coates MM, *et al.* Global, regional, and national levels of neonatal, infant, and under-5 mortality during 1990-2013: a systematic analysis for the Global Burden of Disease Study 2013. *Lancet* 2014; **384**: 957–79.
- 12 Forouzanfar MH, Foreman KJ, Delossantos AM, *et al.* Breast and cervical cancer in 187 countries between 1980 and 2010: a systematic analysis. *Lancet* 2011; **378**: 1461–84.
- 13 Foreman KJ, Lozano R, Lopez AD, Murray CJ. Modeling causes of death: an integrated approach using CODEm. *Popul Health Metr* 2012; **10**: 1.
- 14 Murray CJL, Rosenfeld LC, Lim SS, *et al.* Global malaria mortality between 1980 and 2010: a systematic analysis. *Lancet* 2012; **379**: 413–31.
- 15 GBD 2013 Mortality and Causes of Death Collaborators. Global, regional, and national age-sex specific all-cause and cause-specific mortality for 240 causes of death, 1990-2013: a systematic analysis for the Global Burden of Disease Study 2013. *Lancet* 2015; **385**: 117–71.
- 16 Murray CJL, Ortblad KF, Guinovart C, *et al.* Global, regional, and national incidence and mortality for HIV, tuberculosis, and malaria during 1990-2013: a systematic analysis for the Global Burden of Disease Study 2013. *Lancet* 2014; **384**: 1005–70.
- 17 Rajaratnam JK, Marcus JR, Flaxman AD, *et al.* Neonatal, postneonatal, childhood, and under-5 mortality for 187 countries, 1970-2010: a systematic analysis of progress towards Millennium Development Goal 4. *Lancet* 2010; **375**: 1988–2008.
- 18 Rasmussen CE, Williams CKI. Gaussian processes for machine learning. Cambridge, Mass.: MIT Press, 2006.
- 19 International Agency for Research on Cancer, World Health Organization. GLOBOCAN estimated cancer incidence, mortality, and prevalence worldwide in 2012. Lyon, France: IARC, 2014 <http://globocan.iarc.fr/Default.aspx> (accessed April 19, 2016).
- 20 Karagas MR, Greenberg ER, Spencer SK, Stukel TA, Mott LA. Increase in incidence rates of basal cell and squamous cell skin cancer in New Hampshire, USA. New Hampshire Skin Cancer Study Group. *Int J Cancer* 1999; **81**: 555–9.

## Cardiovascular Diseases

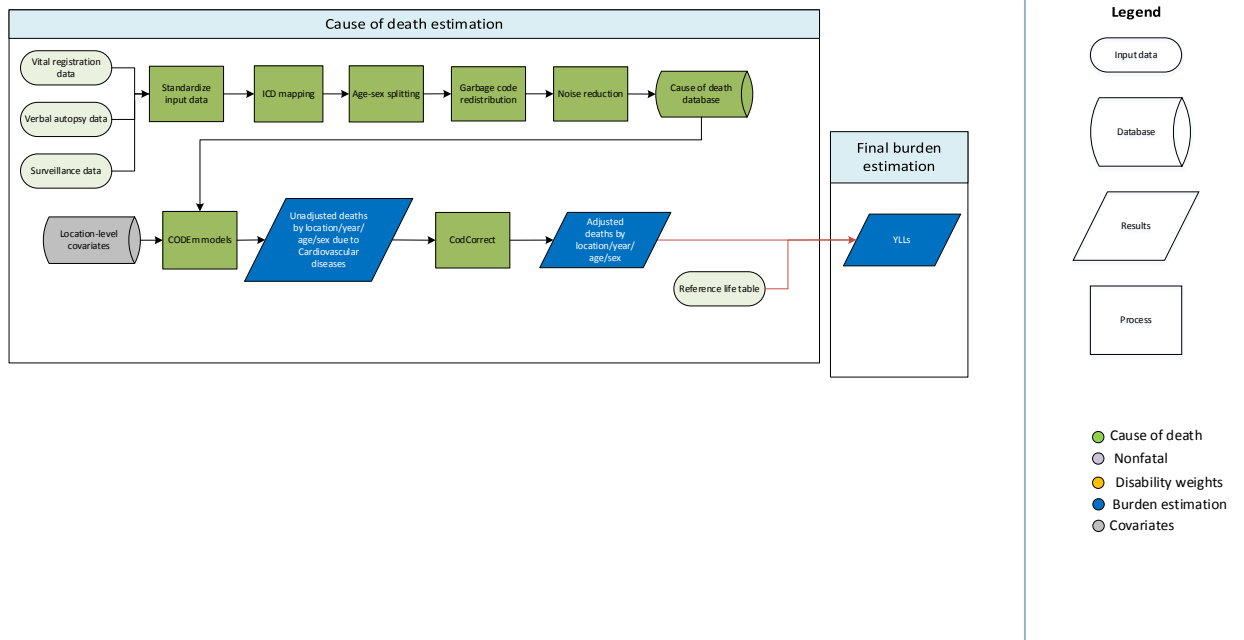

### Input data

Vital registration, verbal autopsy, and surveillance data were used to model this cause. We outliered non-representative subnational verbal autopsies in a number of Indian states. We also outliered verbal autopsy data sources that were implausibly low in all age groups and ICD8 and ICD9 BTL data points that were inconsistent with the rest of the data and created implausible time trends.

### Modeling strategy

We used a standard CODEm approach to model deaths from cardiovascular diseases. We have included two new variables, Socio-Demographic Index and the SEV scalar for rheumatic heart disease, as possible covariates for selection in the ensemble modeling process. Otherwise, there have been no substantive changes from the approach used in GBD 2013.

## Rheumatic Heart Disease

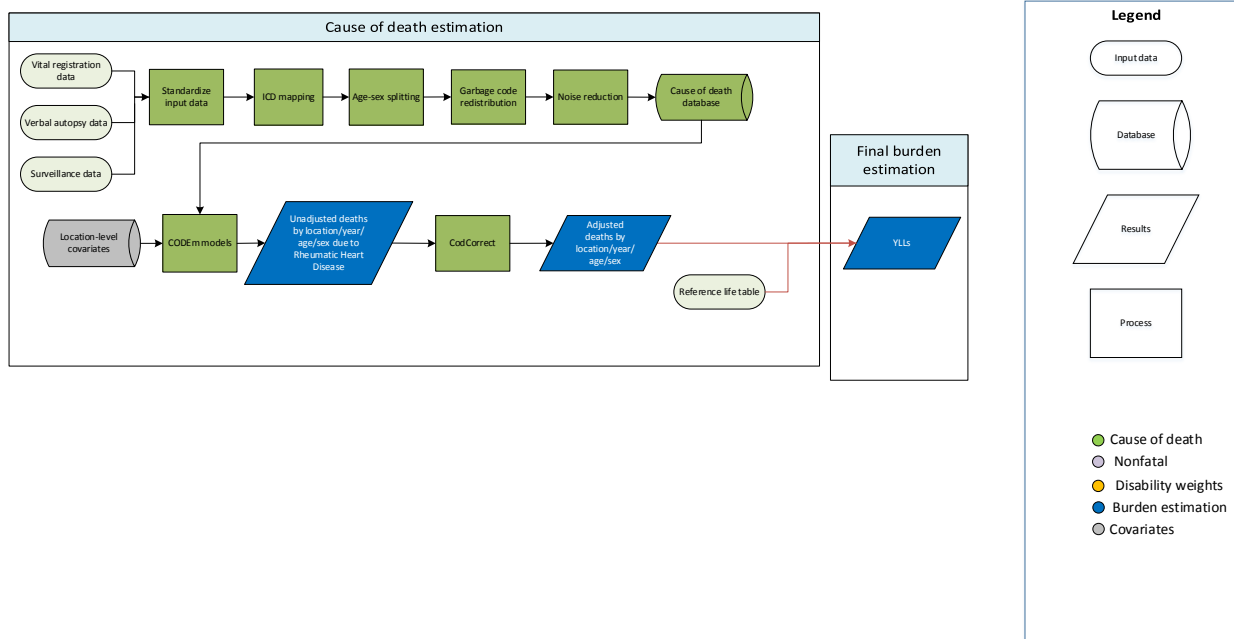

### Input data

Vital registration, verbal autopsy, and surveillance data were used to model rheumatic heart disease. We outliered ICD8 and ICD9 BTL data points which were inconsistent with the rest of the data and created implausible time trends. We also outliered data points which were too high after the redistribution process in a number of age groups.

### Modeling strategy

We used a standard CODEm approach to model deaths from rheumatic heart disease. We have included two new variables, Socio-Demographic Index and the SEV scalar for rheumatic heart disease, as possible covariates for selection in the ensemble modeling process. Otherwise, there have been no substantive changes from the approach used in GBD 2013.

## Ischemic Heart Disease

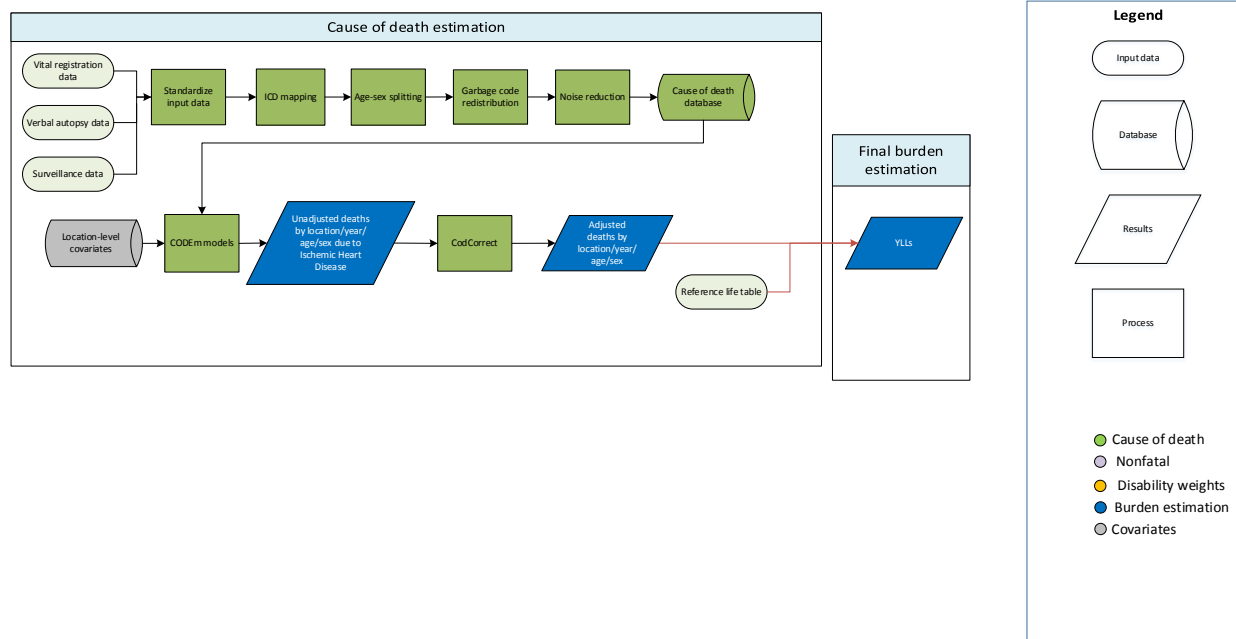

### Input data

Vital registration, verbal autopsy, and surveillance data were used to model ischemic heart disease. We outliered verbal autopsy data in countries and subnational locations where high-quality vital registration data were also available. We also outliered non-representative subnational verbal autopsy data points, ICD8 and ICD9 BTL data points which were inconsistent with the rest of the data and created implausible time trends, and data in a number of Indian states identified by experts as poor-quality.

### Modeling strategy

We used a standard CODEm approach to model deaths from ischemic heart disease. We have included two new variables, Socio-Demographic Index and the SEV scalar for ischemic heart disease, as possible covariates for selection in the ensemble modeling process. Otherwise, there have been no substantive changes from the approach used in GBD 2013.



## Cerebrovascular Disease

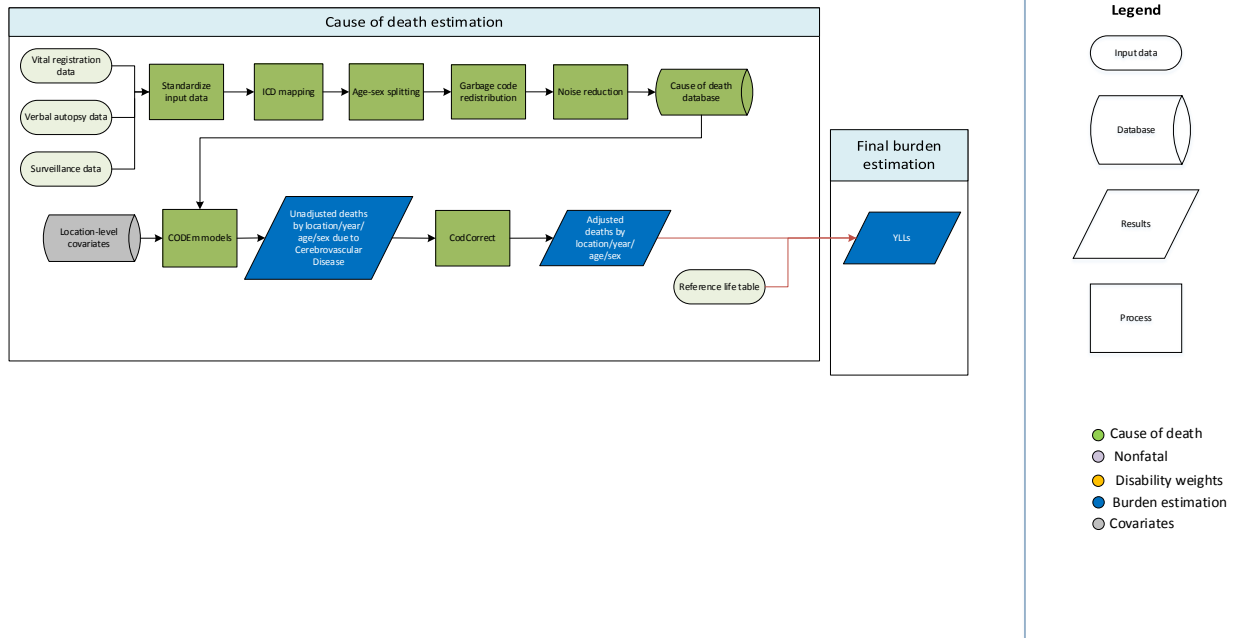

### Input data

Verbal autopsy and vital registration data were used to model this cause. We outliered non-representative subnational verbal autopsy data points. We reassigned deaths from verbal autopsy reports for cerebrovascular disease to the parent cardiovascular disease for both sexes for those under 20 years of age. We also outliered ICD8, ICD9 BTL, and ICD10 Tabulated data points which were inconsistent with the rest of the data and created implausible time trends. Data points from sources which were implausibly low in all age groups and data points that were causing the regional estimates to be improbably high were outliered.

### Modeling strategy

We used a standard CODEm approach to model deaths from cerebrovascular disease. We have included two new variables, Socio-Demographic Index and the SEV scalar for cerebrovascular disease, as possible covariates for selection in the ensemble modeling process. Otherwise, there have been no substantive changes from the approach used in GBD 2013.

# Ischemic Stroke

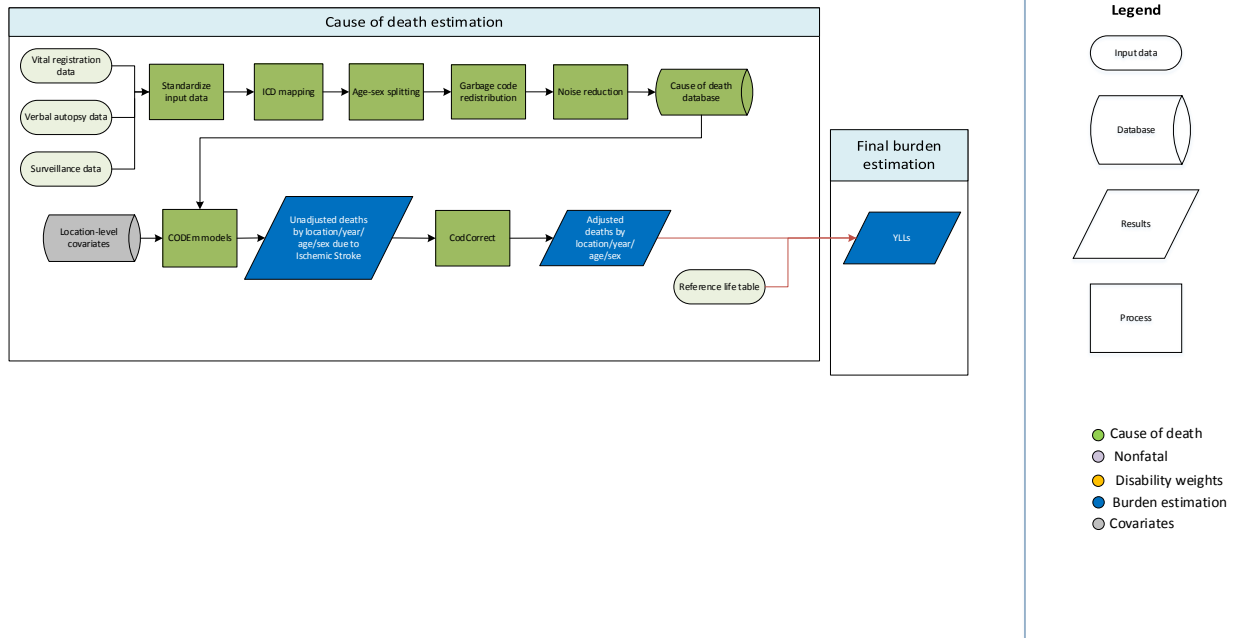

## Input data

Vital registration, verbal autopsy, and surveillance data were used to model ischemic stroke. We reassigned deaths from verbal autopsy reports for ischemic stroke to the parent cardiovascular disease for both sexes for those under 20 years of age. We outliered ICD8 data points which were inconsistent with the rest of the data and created implausible time trends.

## Modeling strategy

We used a standard CODEm approach to model deaths from ischemic stroke. In locations with limited data on ischemic stroke, the subtype-specific deaths were estimated by squeezing both ischemic and hemorrhagic stroke to the overall cerebrovascular envelope. We have included two new variables, Socio-Demographic Index and the SEV scalar for ischemic stroke, as possible covariates for selection in the ensemble modeling process. Otherwise, there have been no substantive changes from the approach used in GBD 2013.

## Hemorrhagic Stroke

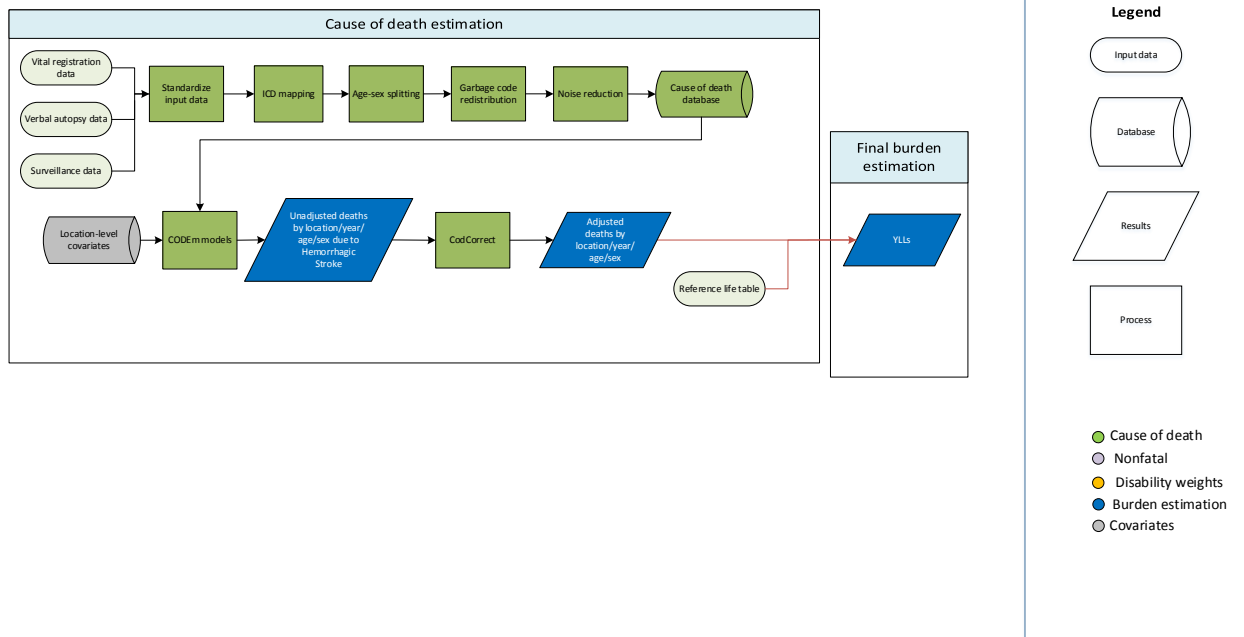

### Input data

Vital registration, verbal autopsy, and surveillance data were used to model hemorrhagic stroke. We reassigned deaths from verbal autopsy reports for hemorrhagic stroke to the parent cardiovascular disease for both sexes for those under 20 years of age. We outliered ICD8 data points which were inconsistent with the rest of the data and created implausible time trends.

### Modeling strategy

We used a standard CODEm approach to model deaths from hemorrhagic stroke. In locations with limited data on hemorrhagic stroke, the subtype-specific deaths were estimated by squeezing both ischemic and hemorrhagic stroke to the overall cerebrovascular envelope. We have included two new variables, Socio-Demographic Index and the SEV scalar for hemorrhagic stroke, as possible covariates for selection in the ensemble modeling process. Otherwise, there have been no substantive changes from the approach used in GBD 2013.

# Hypertensive Heart Disease

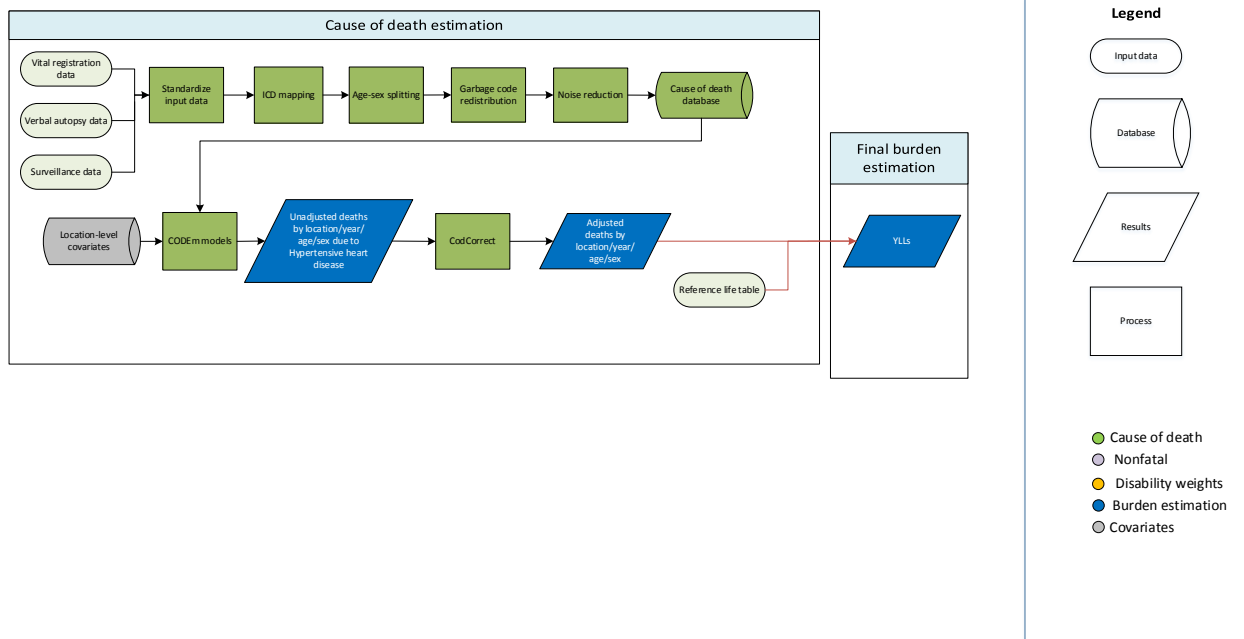

## Input data

Vital registration, verbal autopsy, and surveillance data were used to model hypertensive heart disease. We outliered ICD9 BTL data points, which were inconsistent with the rest of the data and created implausible time trends.

## Modeling strategy

We used a standard CODEm approach to model deaths from hypertensive heart disease. We have included two new variables, Socio-Demographic Index and the SEV scalar for hypertensive heart disease, as possible covariates for selection in the ensemble modeling process. Otherwise, there have been no substantive changes from the approach used in GBD 2013.

## Cardiomyopathy and Myocarditis

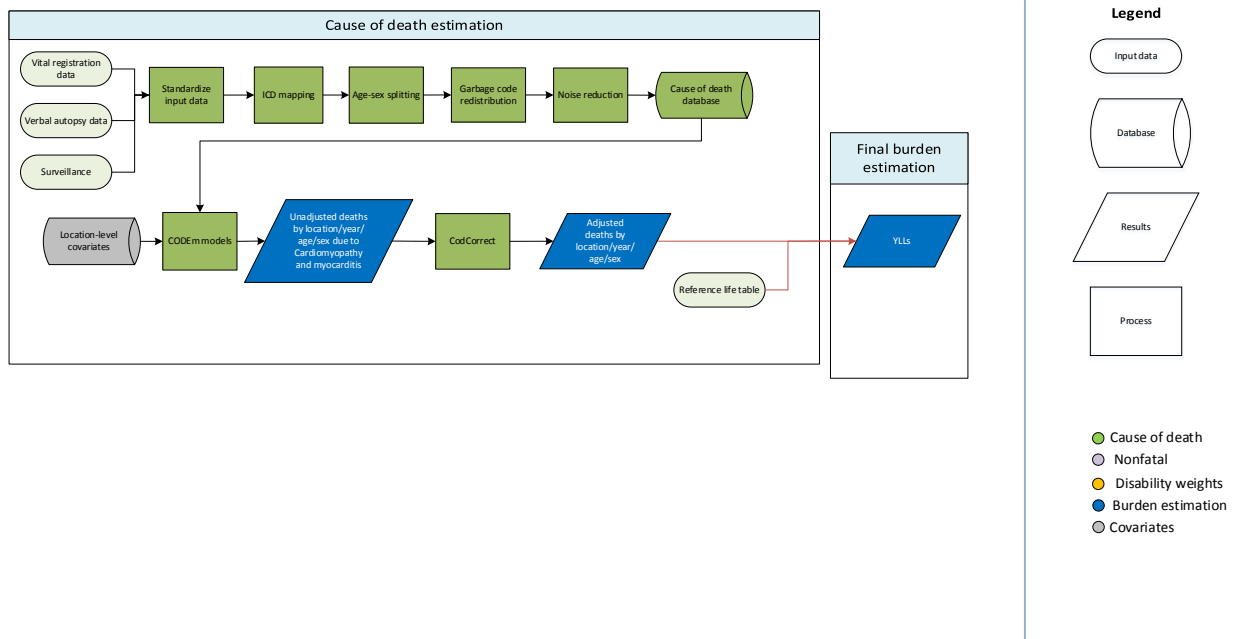

### Input data

Vital registration, verbal autopsy, and surveillance data were used to model cardiomyopathy and myocarditis. We outliered data points in Central Asia and Central and Eastern Europe due to implausibly high values which we attributed to variation in local coding practices. We also outliered ICD8 data points in countries where they were discontinuous with other data in the time series.

### Modeling strategy

We used a standard CODEm approach to model deaths from cardiomyopathy and myocarditis. We have included two new variables, Socio-Demographic Index and the SEV scalar for cardiomyopathy and myocarditis, as possible covariates for selection in the ensemble modeling process. Otherwise, there have been no substantive changes from the approach used in GBD 2013. Finally, local differences in coding practices may explain some of the geographic variation that we see for deaths due to cardiomyopathy; we plan to explore this issue further in future iterations of GBD.

## Aortic Aneurysm

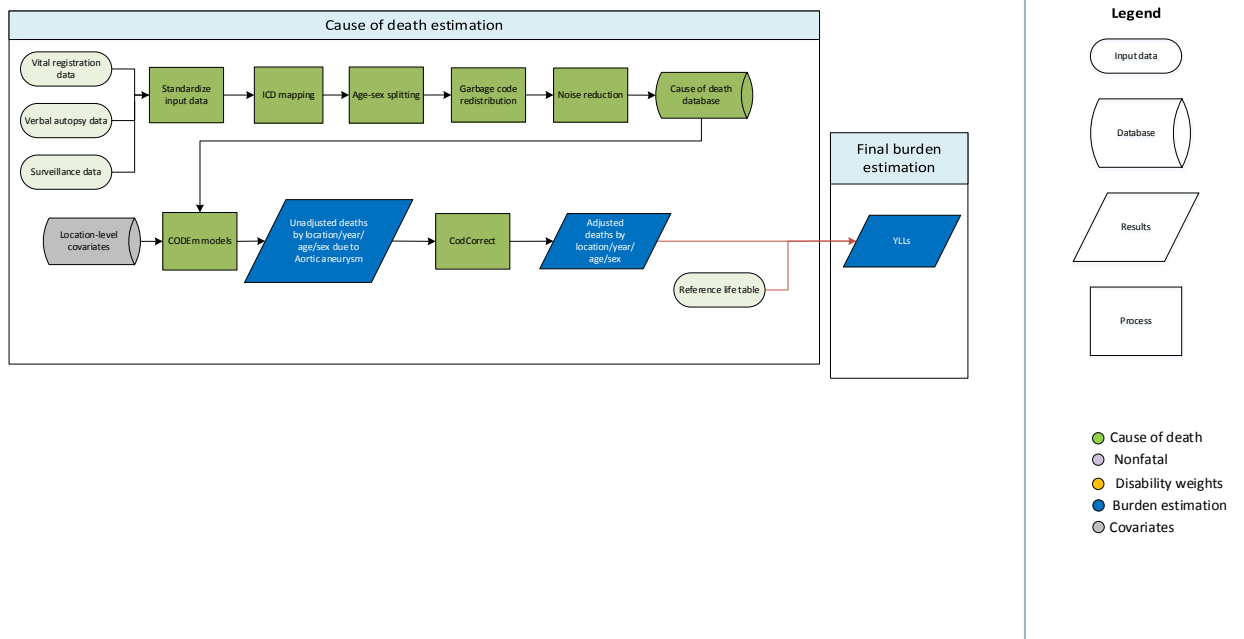

### Input data

Vital registration, verbal autopsy, and surveillance data were used to model this cause. We outliered data in Oman as they were improbably high in comparison with the rest of the region. We also outliered ICD8 data that were discontinuous with the rest of the time series and created implausible time trends.

### Modeling strategy

We used a standard CODEm approach to model deaths from aortic aneurysm. We have included two new variables, Socio-Demographic Index and the SEV scalar for aortic aneurysm, as possible covariates for selection in the ensemble modeling process. Otherwise, there have been no substantive changes from the approach used in GBD 2013.

## Peripheral Vascular Disease

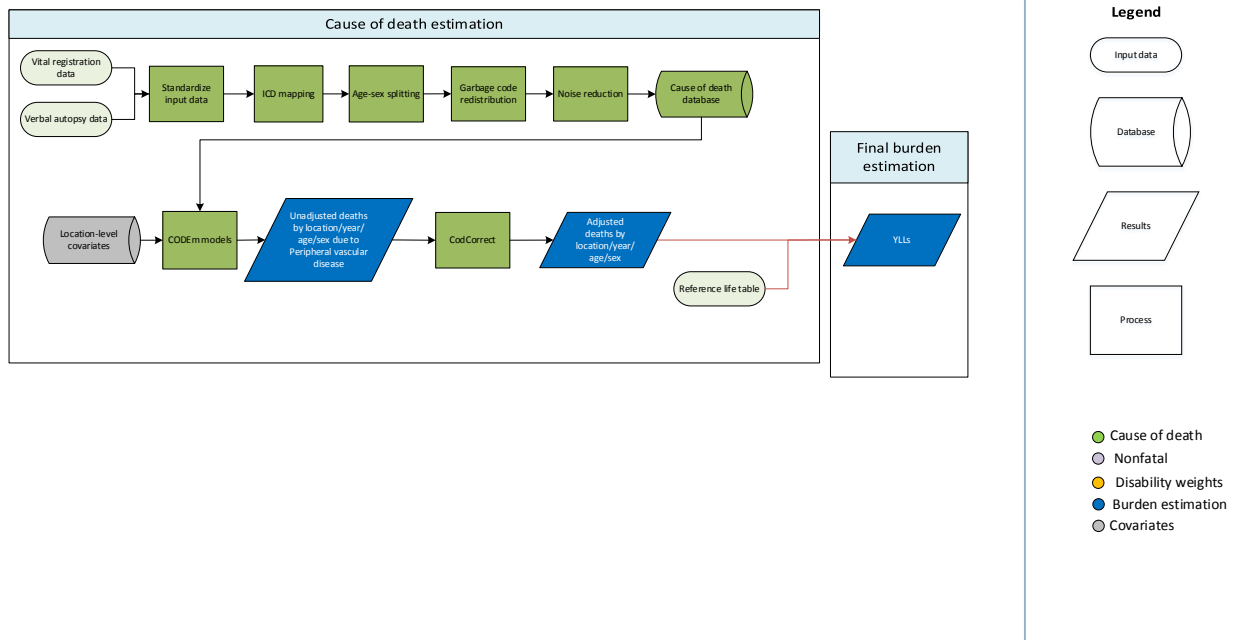

### Input data

Vital registration and verbal autopsy data were used to model peripheral vascular disease. We outliered all data points with <1 death in Egypt per expert review.

### Modeling strategy

We used a standard CODEm approach to model deaths from peripheral vascular disease. We have included two new variables, Socio-Demographic Index and the SEV scalar for peripheral vascular disease, as possible covariates for selection in the ensemble modeling process. Otherwise, there have been no substantive changes from the approach used in GBD 2013.

## Endocarditis

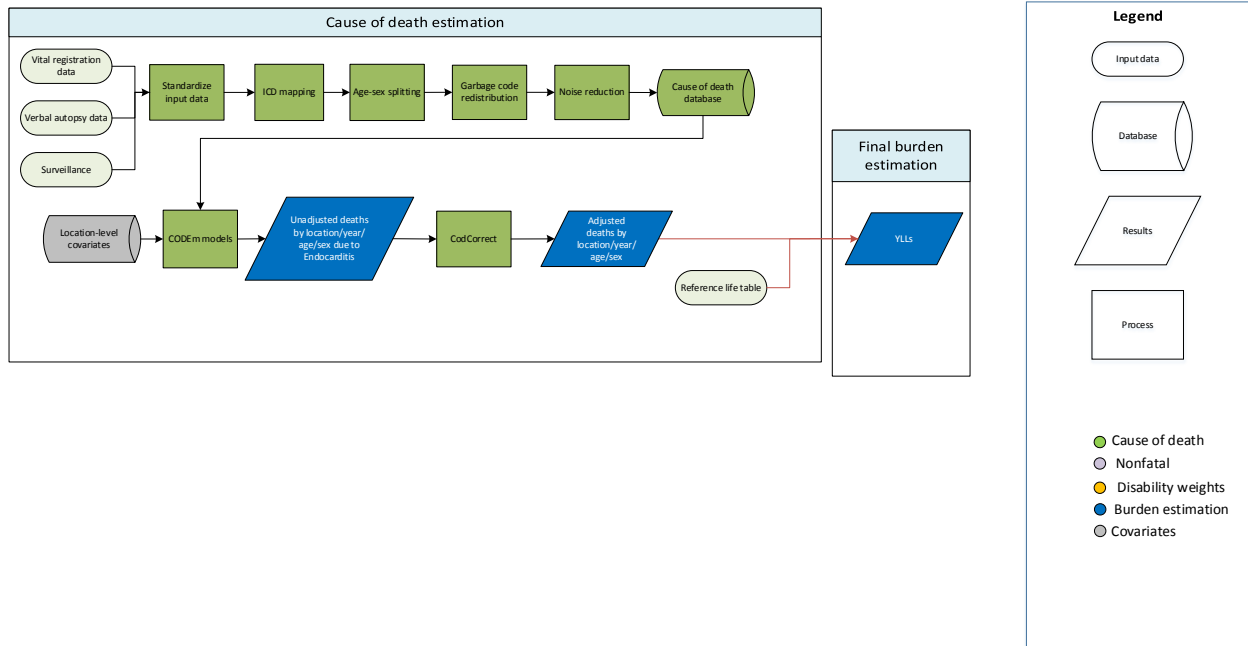

### Input data

Vital registration, verbal autopsy, and surveillance data were used to model endocarditis. We outliered vital registration data in Mozambique as these were non-representative for sub-Saharan Africa and were causing regional estimates to be implausibly low. We also outliered ICD8 data that were discontinuous from the rest of the data series and created an implausible time trend.

### Modeling strategy

We used a standard CODEm approach to model deaths from endocarditis. We have included two new variables, Socio-Demographic Index and the SEV scalar for endocarditis, as possible covariates for selection in the ensemble modeling process. Otherwise, there have been no substantive changes from the approach used in GBD 2013.



## Other Cardiovascular and Circulatory Diseases

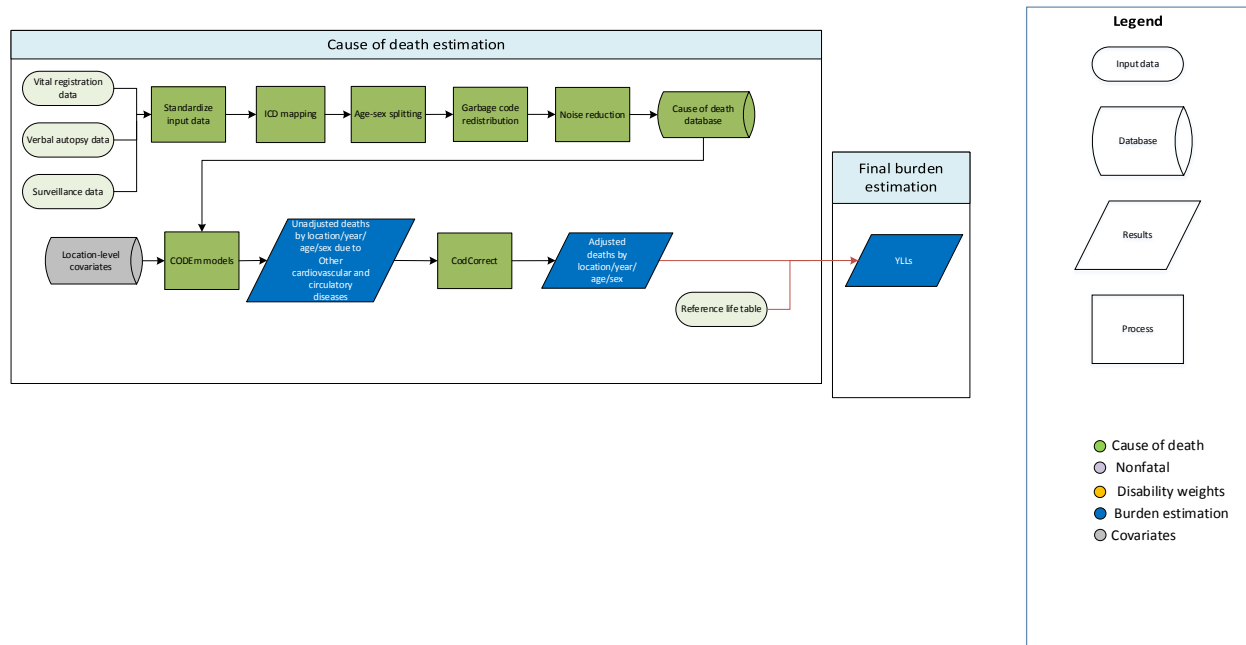

### Input data

Vital registration, verbal autopsy, and surveillance data were used to model other cardiovascular and circulatory diseases. We outliered ICD8 and ICD9 BTL data points that were inconsistent with the rest of the data and created implausible time trends. We also outliered ICD8 data points which were not nationally representative.

### Modeling strategy

We used a standard CODEm approach to model deaths from other cardiovascular and circulatory diseases. We have included two new variables, Socio-Demographic Index and the SEV scalar for other cardiovascular and circulatory diseases, as possible covariates for selection in the ensemble modeling process. Otherwise, there have been no substantive changes from the approach used in GBD 2013.

## Chronic Respiratory Diseases

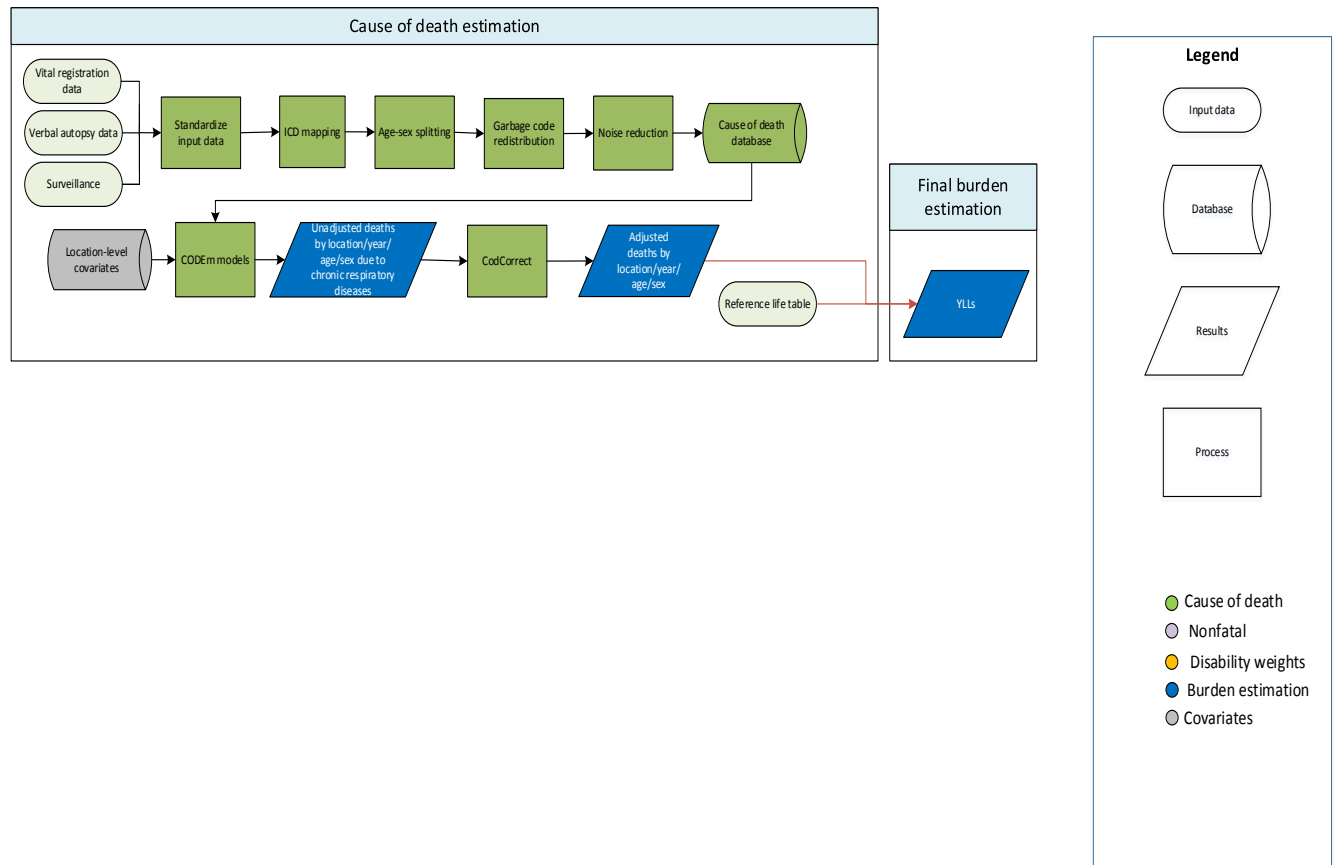

### Input data

Sources used to estimate chronic respiratory disease mortality included vital registration, verbal autopsy, and surveillance data from the cause of death (COD) database. Our outlier criteria excluded data points that (1) were implausibly high or low, (2) substantially conflicted with established age or temporal patterns, or (3) significantly conflicted with other data sources conducted from the same locations or locations with similar characteristics (i.e., Socio-Demographic Index).

For GBD 2015, there were two significant changes in the data preparation process that affect Chronic Respiratory Diseases and its children causes. First, the algorithm package that redistributes heart-failure-related garbage codes has been updated to take into account the “side” of the heart failure – with right heart failure denoting an underlying respiratory disease. Second, verbal autopsy data are no longer used to inform children causes as they are thought to be unreliable below this cause level. Practically, this has

a larger influence on the uncorrected children models than the parent Chronic Respiratory Diseases model discussed here.

### **Modeling strategy**

The standard CODEm modeling approach was applied to estimate deaths due to chronic respiratory diseases. Chronic respiratory diseases served as the parent cause to chronic obstructive pulmonary disease, pneumoconiosis (including silicosis, asbestosis, coal worker's pneumoconiosis, other pneumoconiosis), asthma, interstitial lung disease and pulmonary sarcoidosis, and other chronic respiratory diseases. Functionally, this means the death estimates for Chronic Respiratory Diseases serve as an envelope into which the children causes are squeezed by the CodCorrect algorithm. This approach allows us to use a broader range of data – specifically verbal autopsy data – which cannot be accurately mapped to a cause further down in the hierarchy.

Separate models were conducted for male and female mortality, and the age range for both models was 0 to 80+ years. The same covariates from GBD 2013 were used, with the addition of the Socio-Demographic Index (SDI) covariate. Although all covariates in this model received updates for GBD 2015, cumulative cigarettes, smoking prevalence, and health systems access received the larger overhauls. The updates to the smoking-based covariates were particularly helpful in developing these models. Beyond changes in the underlying covariates, there were no substantial deviations from the GBD 2013 approach.

## Chronic Obstructive Pulmonary Disease

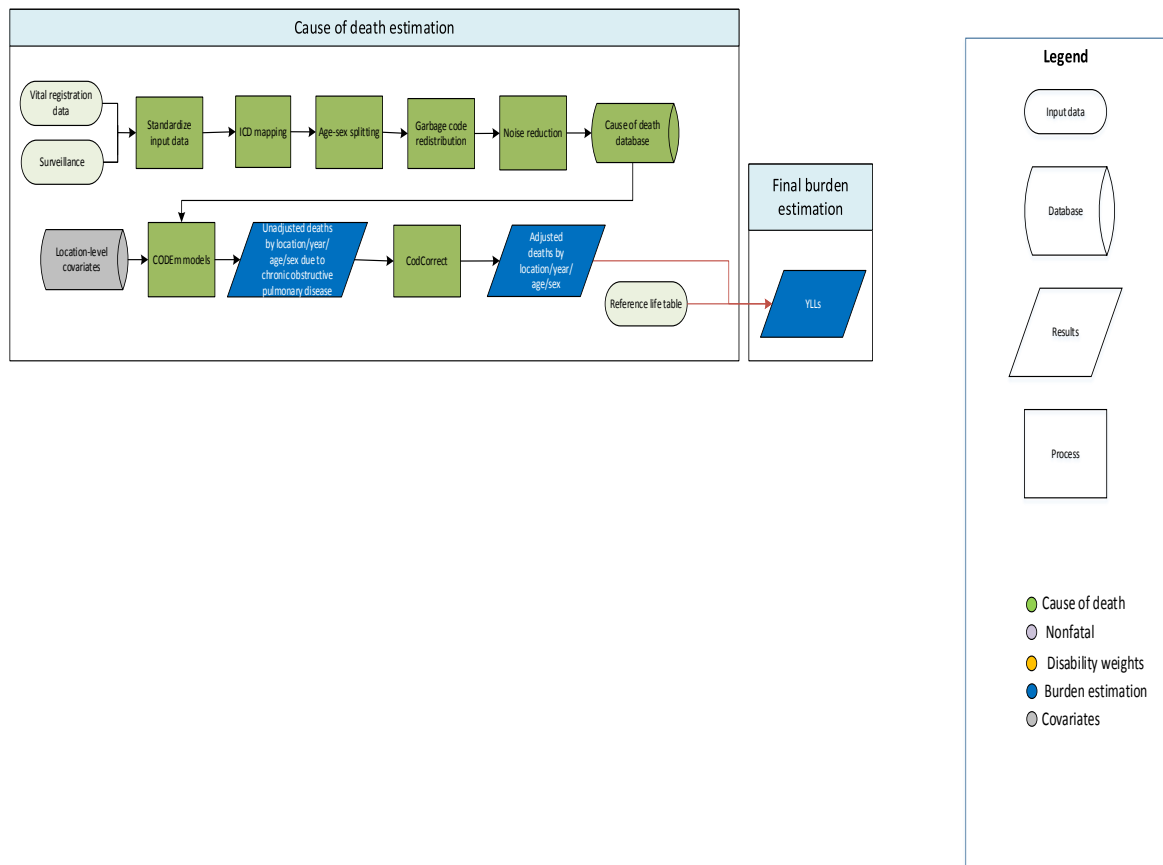

### Input data

Data used to estimate chronic obstructive pulmonary disease (COPD) mortality included vital registration and surveillance data from the cause of death (COD) database. Our outlier criteria excluded data points that (1) were implausibly high or low, (2) substantially conflicted with established age or temporal patterns, or (3) significantly conflicted with other data sources conducted from the same locations or locations with similar characteristics (i.e., Socio-Demographic Index). The main consequences of this protocol are the mapping of state-level data from India MCCD ICD10 to the chronic respiratory parent due to implausibly high values and the outliering of some Thailand vital registration data from the late 90s that implied an unreasonable peak of COPD during the covered time frame.

Notable differences in the data processing strategy relative to GBD 2013 include 1) Verbal autopsy data have been excluded from this model and mapped to the Chronic Respiratory Disease parent cause as we no longer believe that verbal autopsy accurately captures deaths due to specific respiratory diseases, and 2) The heart failure redistribution package has been updated to account for the “side” of the heart. As a result, the amount of heart failure being attributed to chronic respiratory diseases is now largely

based on proportions of left and right heart failure (with right heart failure signifying an underlying respiratory condition). In general, this has reduced the level of COPD deaths – all else being equal.

### **Modeling strategy**

The standard CODEm modeling approach was applied to estimate deaths due to COPD. Separate models were conducted for male and female mortality, and the age range for both models was 28 days to 80+ years. The mortality estimates from the COPD models were ultimately fit into the chronic respiratory diseases envelope.

While the core covariates have remained unchanged, covariates relating to population density and proportion of population living between 500 meters and 1,500 meters of elevation have been removed because they increased model run time without substantially contributing to the model results. Conversely, 10-year cumulative cigarette consumption has been added to the model to better capture any smoking-related lag effects on COPD, along with the Socio-Demographic Index (SDI) covariate.

## Pneumoconiosis diseases:

Pneumoconiosis, silicosis, asbestosis, coal worker’s pneumoconiosis, and other pneumoconiosis

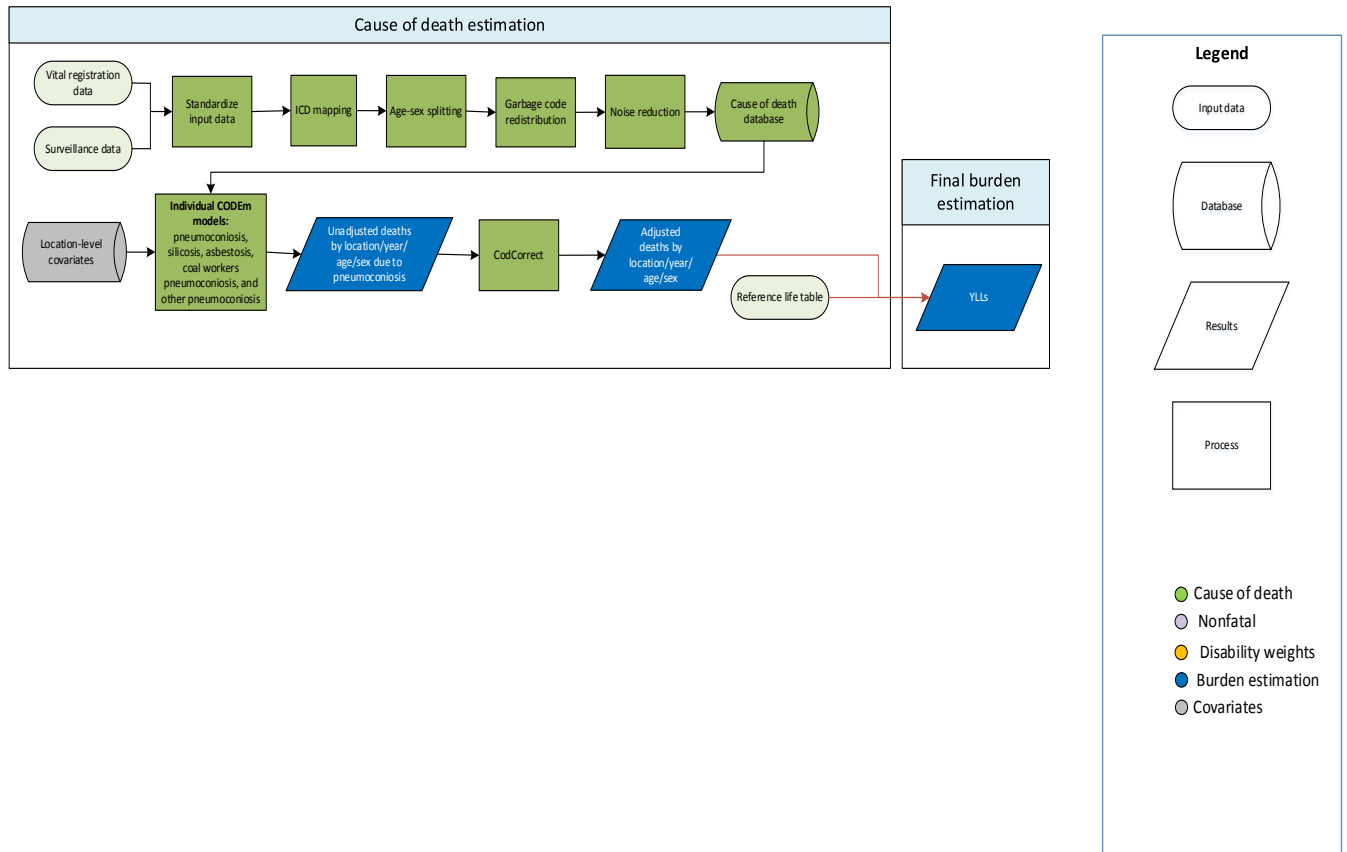

## Input data

Data used to estimate pneumoconiosis diseases mortality included vital registration and surveillance data from the cause of death (COD) database. Our outlier criteria excluded data points that (1) were implausibly high or low, (2) substantially conflicted with established age or temporal patterns, or (3) significantly conflicted with other data sources conducted from the same locations or locations with similar characteristics (i.e., Socio-Demographic Index).

The major change in data processing relative to GBD 2013 is the removal of pneumoconiosis and its children causes from possible targets for heart failure redistribution. All else being equal, this results in a slight drop in uncorrected estimates relative to GBD 2013. The decision to alter “targeting” was made to improve the stability of the model and avoid artificial inflation of death estimates from the garbage code redistribution process.

### Modeling strategy

The standard CODEm modeling approach was applied to estimate deaths due to pneumoconiosis diseases. Separate models were conducted for male and female mortality, and the age range for both models was 1–80+ years. The mortality estimates from pneumoconiosis disease models were ultimately fit into the chronic respiratory envelope, which is the parent cause for pneumoconiosis disease. The pneumoconiosis model serves as an envelope for silicosis, asbestosis, coal worker’s pneumoconiosis, and other pneumoconiosis. This two-stage parent-child relationship is applied by the CodCorrect algorithm.

The covariates used in GBD 2013 have been updated and carried over to GBD 2015, with the addition of the Socio-Demographic Index (SDI) covariate.

# Asthma

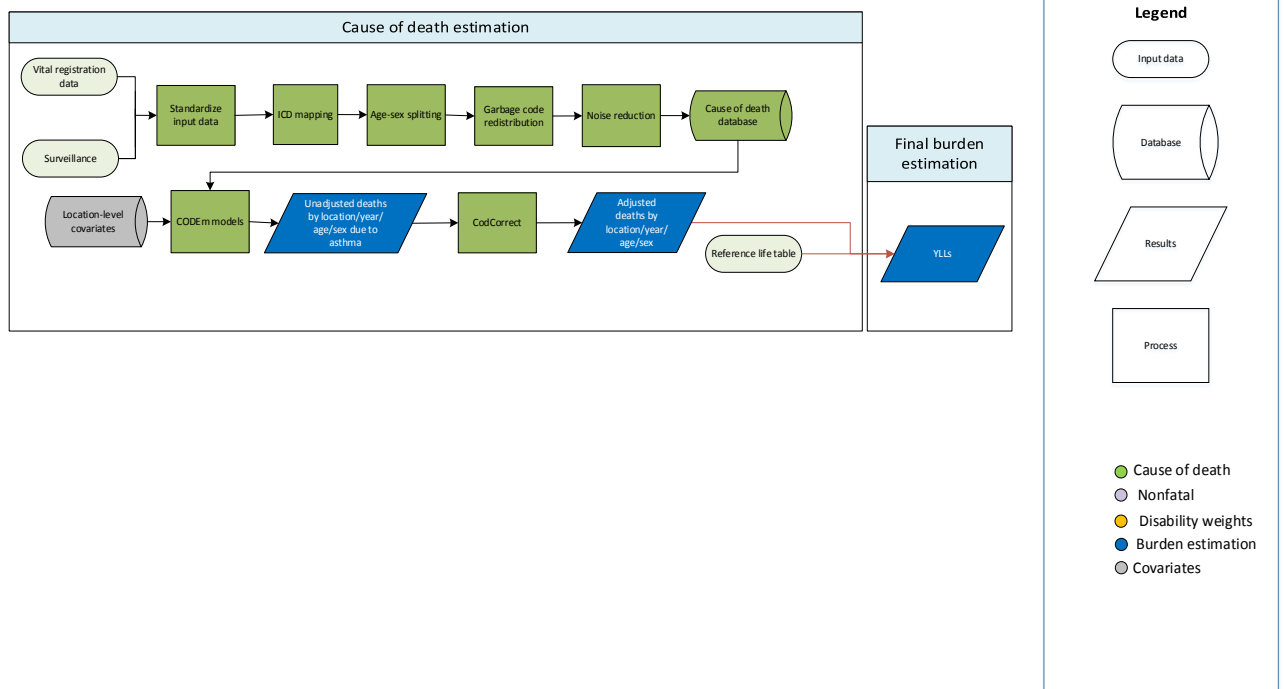

## Input data

Data used to estimate asthma mortality included vital registration and surveillance data from the cause of death (COD) database. Verbal autopsy data were not included and were instead mapped to the parent model (Chronic Respiratory Diseases). Our outlier criteria excluded data points that (1) were implausibly high or low relative to global or regional patterns, (2) substantially conflicted with established age or temporal patterns, or (3) significantly conflicted with other data sources conducted from the same locations or locations with similar characteristics (i.e., Socio-Demographic Index).

## Modeling strategy

The standard CODEm modeling approach was applied to estimate deaths due to asthma. Separate models were conducted for male and female mortality, and the age range for both models was 1–80+ years. The mortality estimates from the asthma models were ultimately fit into the chronic respiratory diseases envelope.

Notable differences between the GBD 2013 strategy and this iteration are across the board updates in smoking-based covariates, the removal of elevation and population density covariates due to lack of informative contributions, and the inclusion of the Socio-Demographic Index (SDI) covariate and the SEV-scalar (disease-specific values that reflect the combined effect of all GBD risks) for asthma.



## Interstitial lung disease and pulmonary sarcoidosis

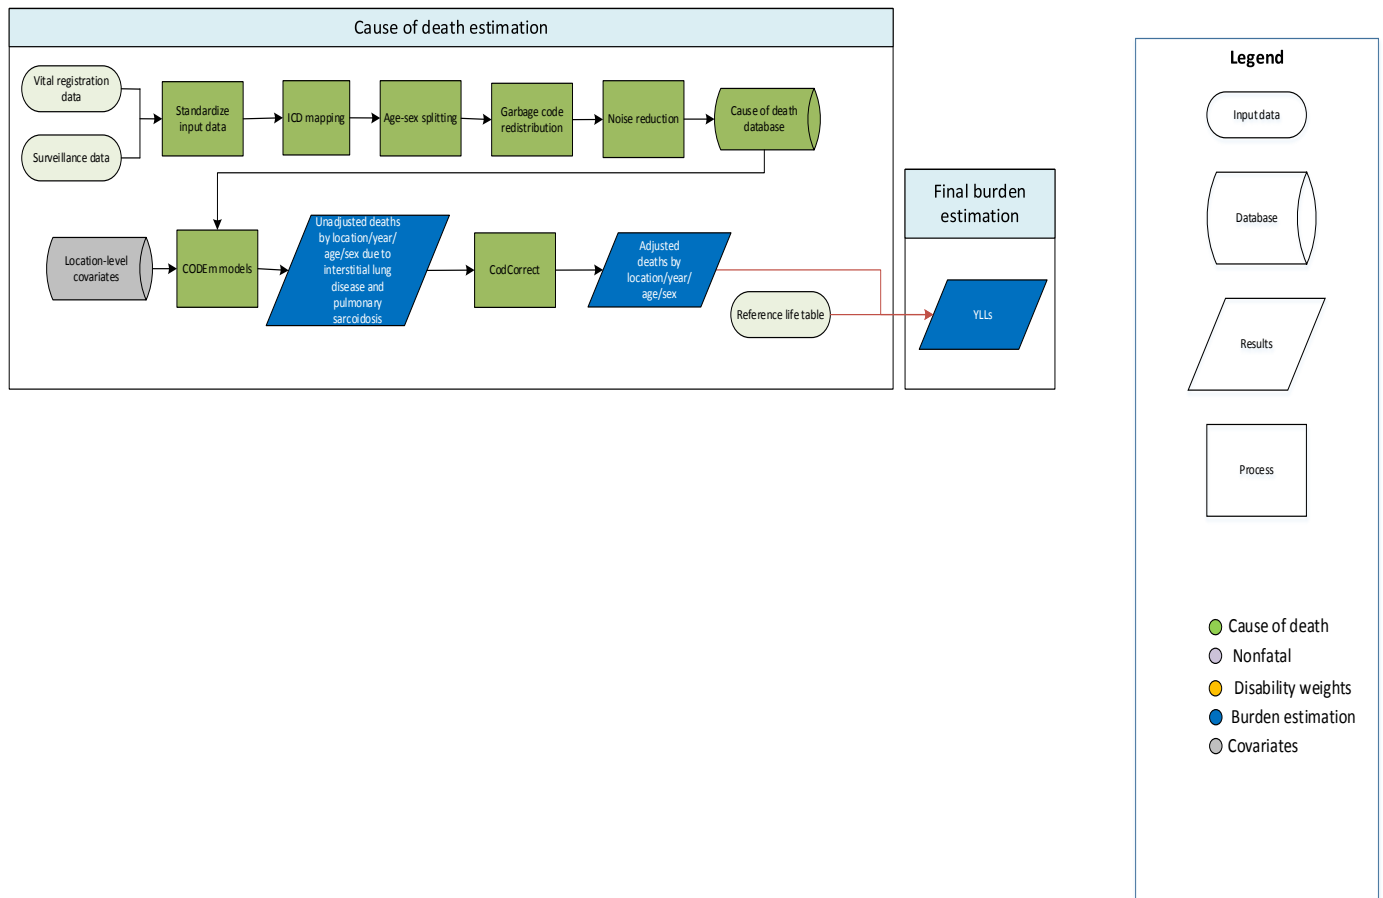

### Input data

Data used to estimate interstitial lung disease and pulmonary sarcoidosis mortality included vital registration and surveillance data from the cause of death (COD) database. Our outlier criteria excluded data points that (1) were implausibly high or low, (2) substantially conflicted with established age or temporal patterns, or (3) significantly conflicted with other data sources conducted from the same locations or locations with similar characteristics (i.e., Socio-Demographic Index).

The main difference in data relative to GBD 2013 is the improved the heart failure redistribution package. This method has been updated to account for the “side” of the heart that failed when redistributing garbage coded deaths due to heart failure. As a result, the amount of heart failure being attributed to chronic respiratory diseases is now largely based on proportions of left and right heart

failure (with right heart failure signifying an underlying respiratory condition). In general, this has reduced the level of COPD deaths – all else being equal.

### **Modeling strategy**

The standard CODEm modeling approach was applied to estimate deaths due to interstitial lung disease and pulmonary sarcoidosis. Separate models were conducted for male and female mortality, and the age range for both models was 1–80+ years. The mortality estimates from the interstitial lung disease and pulmonary sarcoidosis models were ultimately fit into the chronic respiratory envelope. We applied the same set of covariates from GBD 2013, adding the in the associated SEV scalar and Socio-Demographic Index (SDI) covariates. Otherwise, there were no substantial changes from GBD 2013.

## Other chronic respiratory diseases

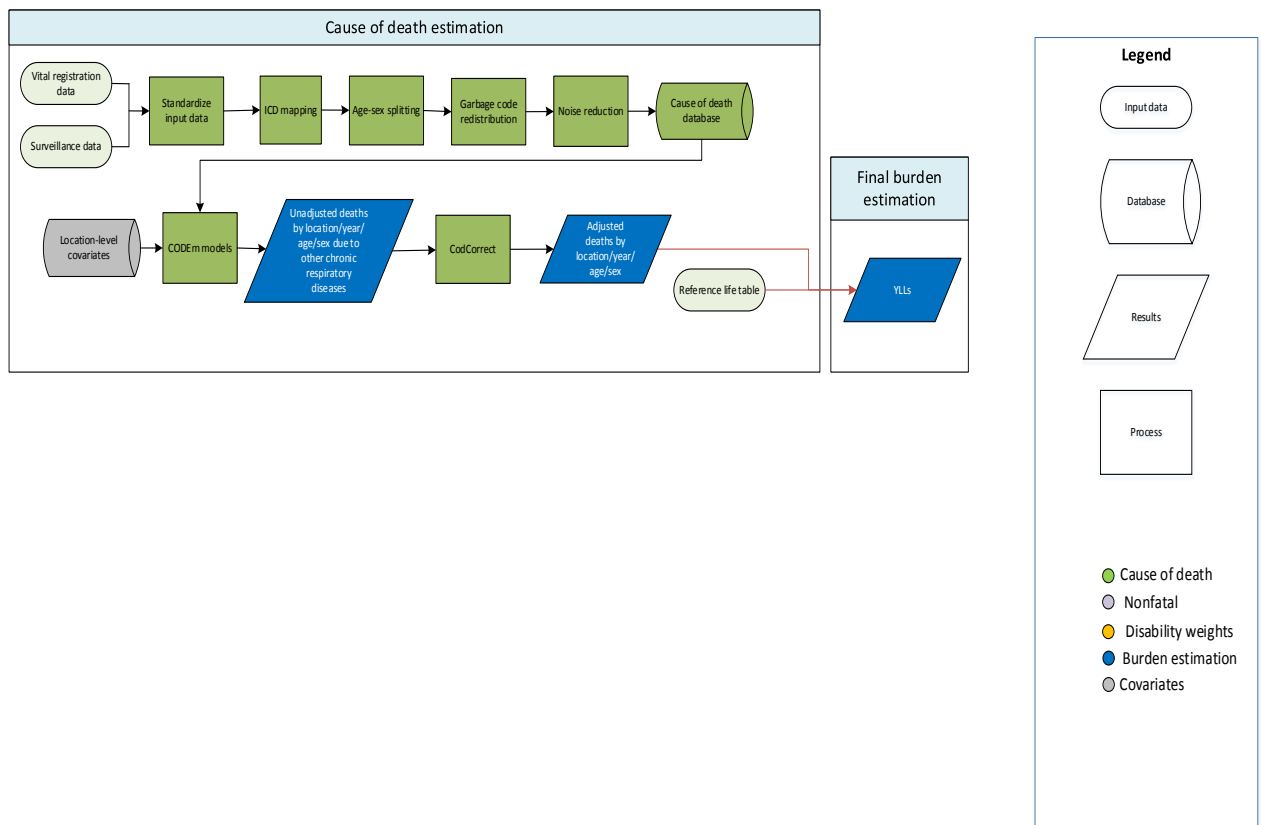

### Input data

Data used to estimate other chronic respiratory diseases included vital registration and surveillance data from the cause of death (COD) database. Our outlier criteria excluded data points that (1) were implausibly high or low, (2) substantially conflicted with established age or temporal patterns, or (3) significantly conflicted with other data sources conducted from the same locations or locations with similar characteristics (i.e., Socio-Demographic Index).

### Modeling strategy

The standard CODEm modeling approach was applied to estimate deaths due to other chronic respiratory diseases. Separate models were conducted for male and female mortality, and the age range for both models was 0 days to 80+ years. Like other respiratory causes, the mortality estimates from other chronic respiratory diseases were ultimately fit into the chronic respiratory envelope.

Besides general updates to the 2013 covariate set (specifically, the health systems and smoking-related ones), the modeling strategy remained unchanged from GBD 2013. For GBD 2015, we included two new covariates: the Socio-Demographic Index (SDI) covariate, and a standardized exposure variable (SEV) scalar (disease-specific values that reflect the combined effect of all GBD risks) for other respiratory

diseases. However, as SEVs are essentially covariate/risk aggregate measures, no substantial changes were expected.

## Digestive Diseases

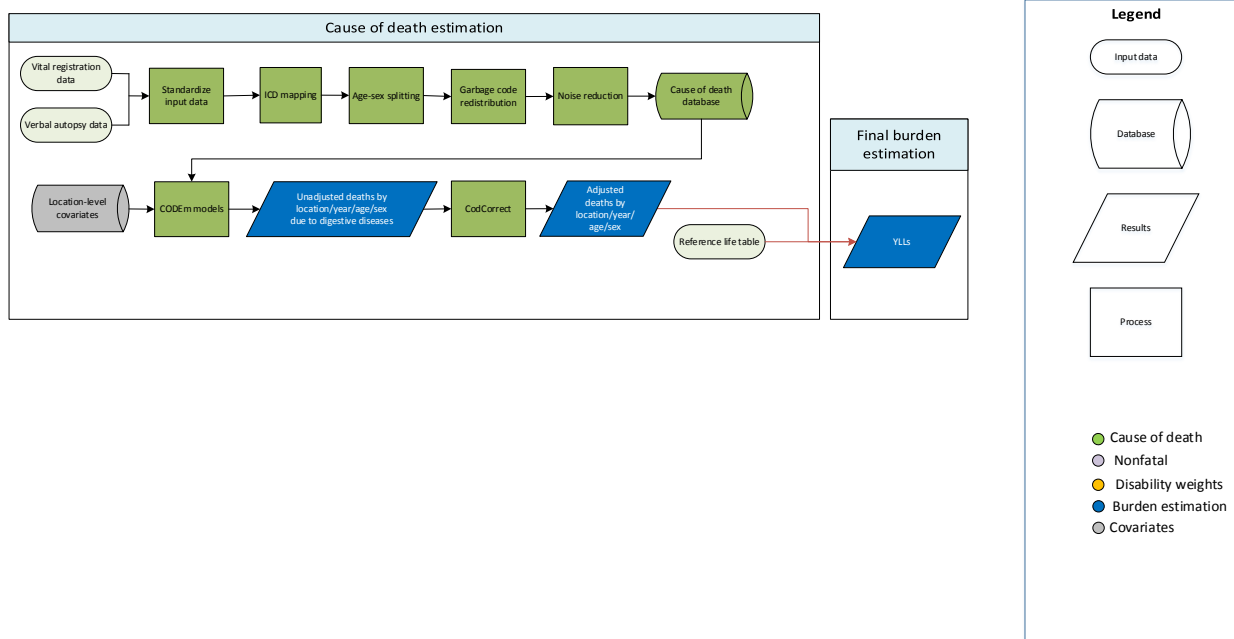

### Input data

Vital registration and verbal autopsy data were used to model this cause. We outliered data in instances where garbage code redistribution and noise reduction, in combination with small sample sizes, resulted in unreasonable cause fractions; and data that violated well-established time or age trends. Outliering methods were consistent across both vital registration and verbal autopsy data.

### Modeling strategy

We modeled deaths due to all digestive diseases with a standard CODEm model using the cause of death database and location-level covariates as inputs. The model followed standard parameters, with the exception that the start age of the model was 1 year old instead of 0. We hybridized separate global and data-rich models to acquire unadjusted results, which we finalized and adjusted using CodCorrect to reach final YLLs due to digestive diseases. There were no significant changes in the modeling process between GBD 2013 and GBD 2015.

## Peptic ulcer disease

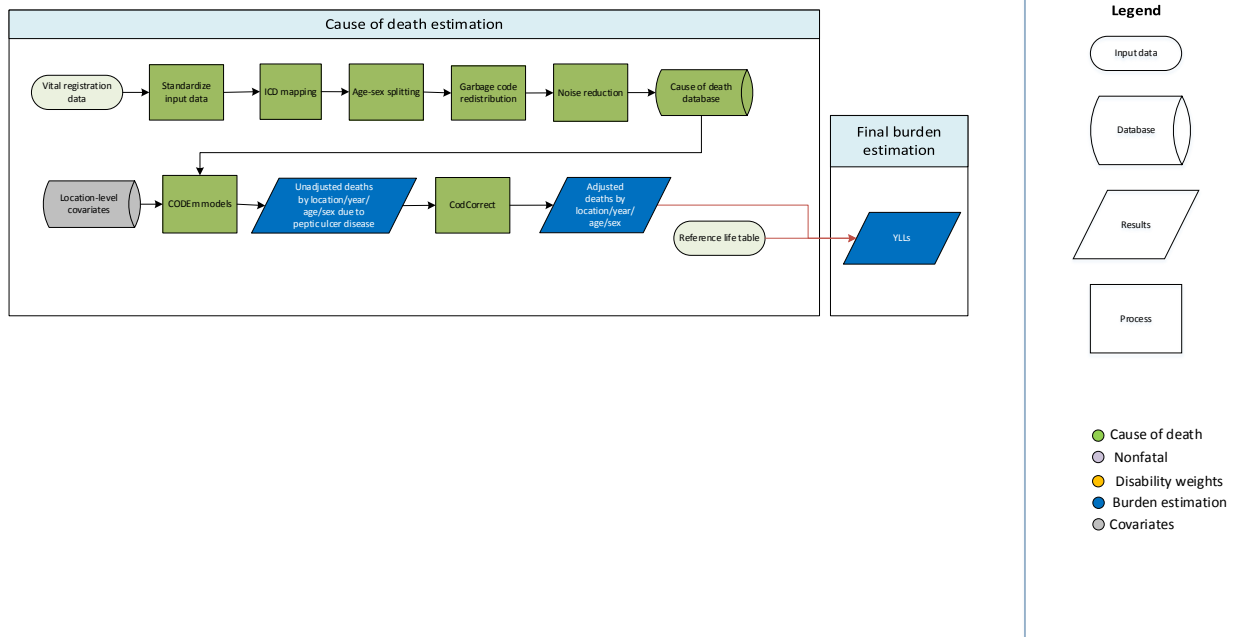

### Input data

Vital registration data were used to model this cause. We outliered data in instances where garbage code redistribution and noise reduction, in combination with small sample sizes, resulted in unreasonable cause fractions, and data that violated well-established time or age trends.

### Modeling strategy

We modeled deaths due to peptic ulcer disease with a standard CODEm model using the cause of death database and location-level covariates as inputs. The model followed standard parameters, with the exception that the start age of the model was 1 year old instead of 0. We hybridized separate global and data-rich models to acquire unadjusted results, which we finalized and adjusted using CodCorrect to reach final YLLs due to peptic ulcer disease. There were no significant changes in the modeling process between GBD 2013 and GBD 2015.

## Gastritis and duodenitis

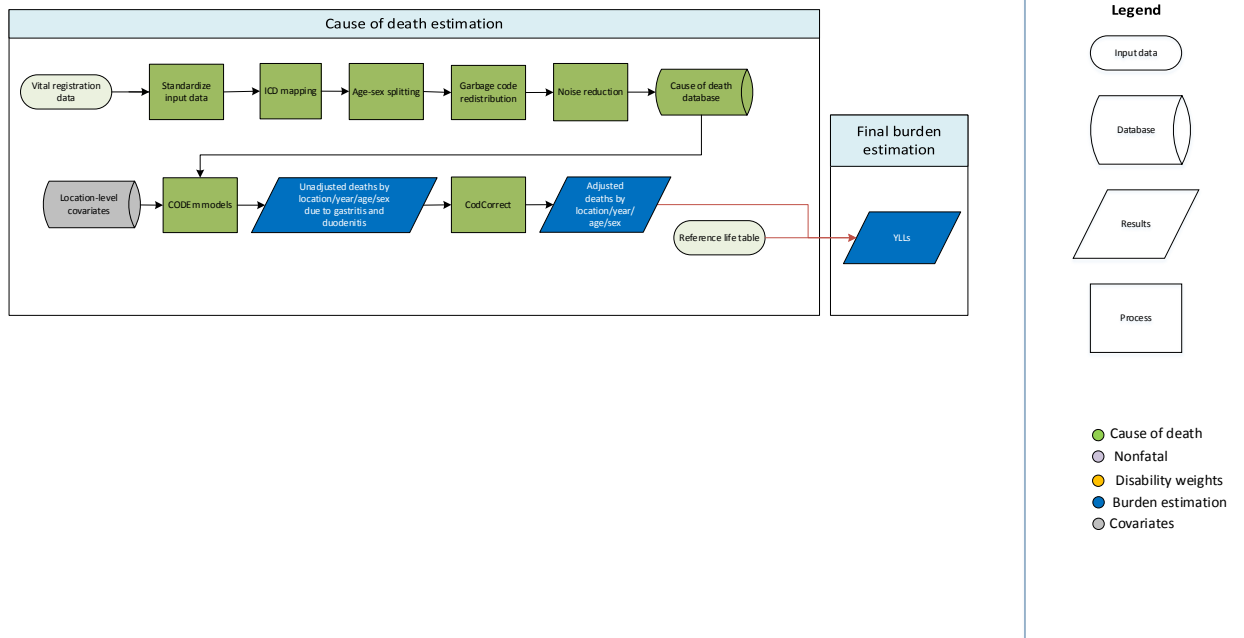

### Input data

Vital registration data were used to model this cause. We outliered data in instances where garbage code redistribution and noise reduction, in combination with small sample sizes, resulted in unreasonable cause fractions, and data that violated well-established time or age trends.

### Modeling strategy

We modeled deaths due to gastritis and duodenitis with a standard CODEm model using the cause of death database and location-level covariates as inputs. The model followed standard parameters, with the exception that the start age of the model was 1 year old instead of 0 and the linear floor rate was lowered to 0.001 in order to better capture low data. We hybridized separate global and data-rich models to acquire unadjusted results, which we finalized and adjusted using CodCorrect to reach final YLLs due to gastritis and duodenitis. There were no significant changes in the modeling process between GBD 2013 and GBD 2015.

## Appendicitis

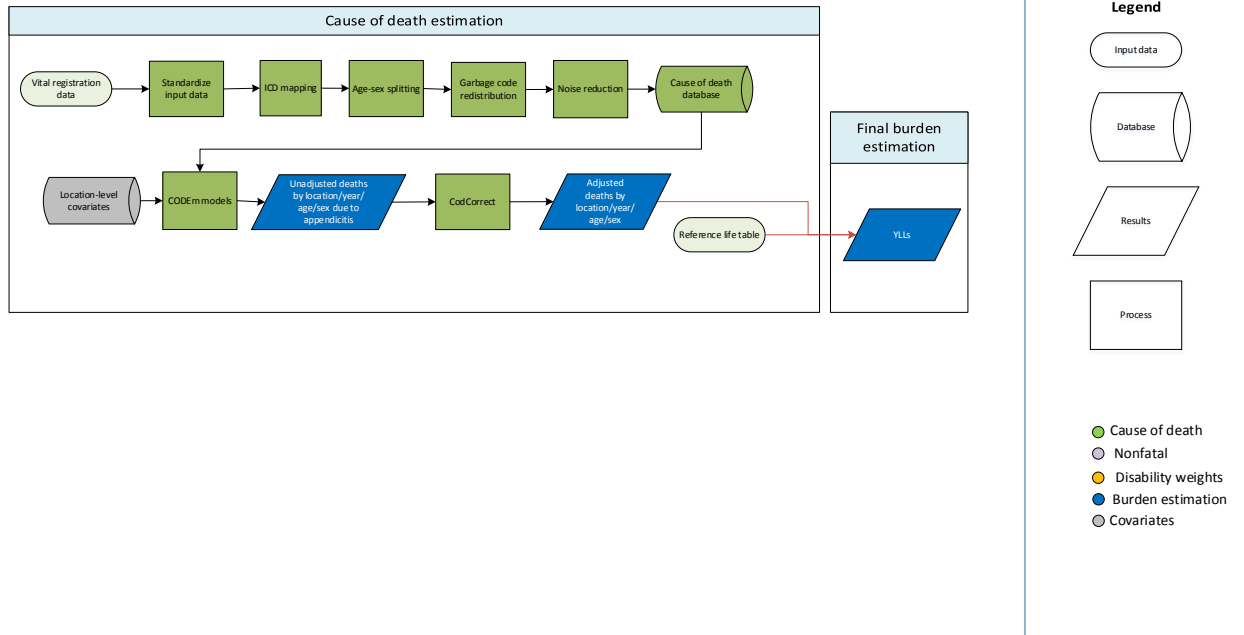

### Input data

Vital registration were used to model this cause. We outliered data in instances where garbage code redistribution and noise reduction, in combination with small sample sizes, resulted in unreasonable cause fractions; and data that violated well-established time or age trends.

### Modeling strategy

We modeled deaths due to appendicitis with a standard CODEm model using the cause of death database and location-level covariates as inputs. The model followed standard parameters, with the exception that the start age of the model was 1 year old instead of 0 and the linear floor rate was lowered to 0.0001 in order to better capture low data. We hybridized separate global and data-rich models to acquire unadjusted results, which we finalized and adjusted using CodCorrect to reach final YLLs due to appendicitis. There were no significant changes in the modeling process between GBD 2013 and GBD 2015.



## Paralytic Ileus and Intestinal Obstruction

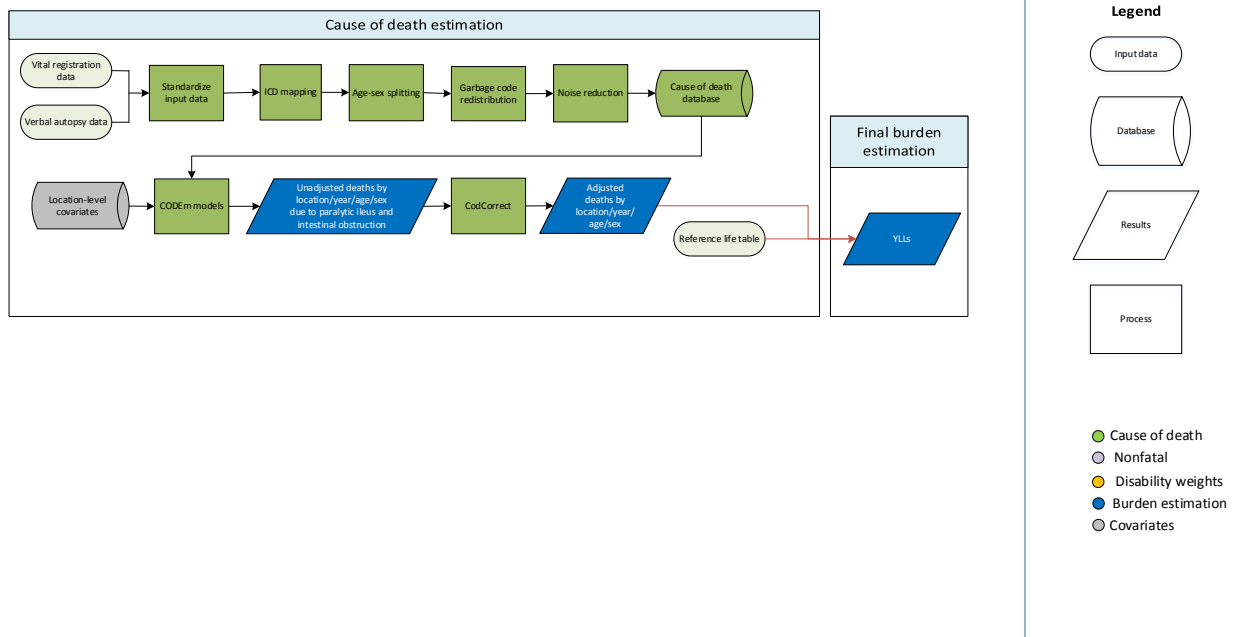

### Input data

Vital registration and verbal autopsy data were used to model this cause. We outliered all VA data in children under the age of 1 because it is not possible to accurately diagnose paralytic ileus or intestinal obstruction in this age group; and data that violated well-established time or age trends; and data in instances where garbage code redistribution and noise reduction, in combination with small sample sizes, resulted in unreasonable cause fractions. Outliering methods were consistent across both vital registration and verbal autopsy data.

### Modeling strategy

We modeled deaths due to paralytic ileus and intestinal obstruction with a standard CODEm model using the cause of death database and location-level covariates as inputs. The model followed standard parameters, with the exception that the linear floor rate was lowered to 0.0001 in order to better capture low data. We hybridized separate global and data-rich models to acquire unadjusted results, which we finalized and adjusted using CodCorrect to reach final YLLs due to paralytic ileus and intestinal obstruction. There were no significant changes in the modeling process between GBD 2013 and GBD 2015.

## Inguinal, Femoral, and Abdominal Hernias

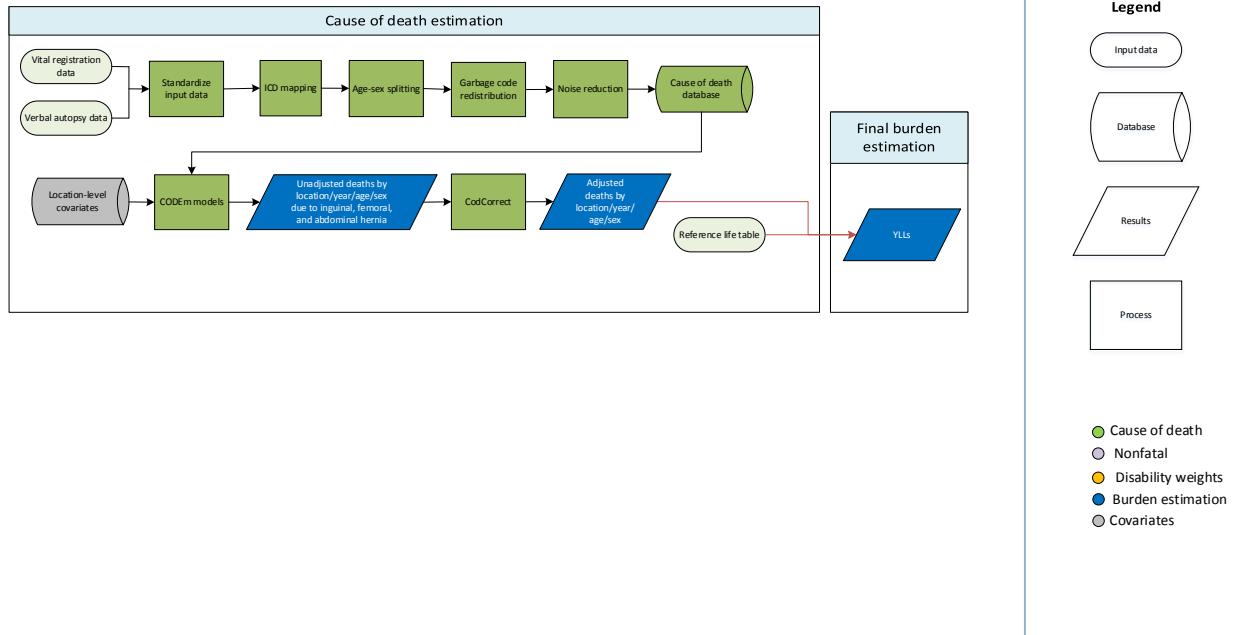

### Input data

Vital registration and verbal autopsy data were used to model this cause. We outliered data in instances where garbage code redistribution and noise reduction, in combination with small sample sizes, resulted in unreasonable cause fractions; and data that violated well-established time or age trends. Outliering methods were consistent across both vital registration and verbal autopsy data.

### Modeling strategy

We modeled deaths due to inguinal, femoral, and abdominal hernias with a standard CODEm model using the cause of death database and location-level covariates as inputs. The model followed standard parameters, with the exception that the start age of the model was 1 year old instead of 0 and the linear floor rate was lowered to 0.0001 in order to better capture low data. We hybridized separate global and data-rich models to acquire unadjusted results, which we finalized and adjusted using CodCorrect to reach final YLLs due to inguinal, femoral, and abdominal hernias. There were no significant changes in the modeling process between GBD 2013 and GBD 2015.

# Inflammatory Bowel Disease

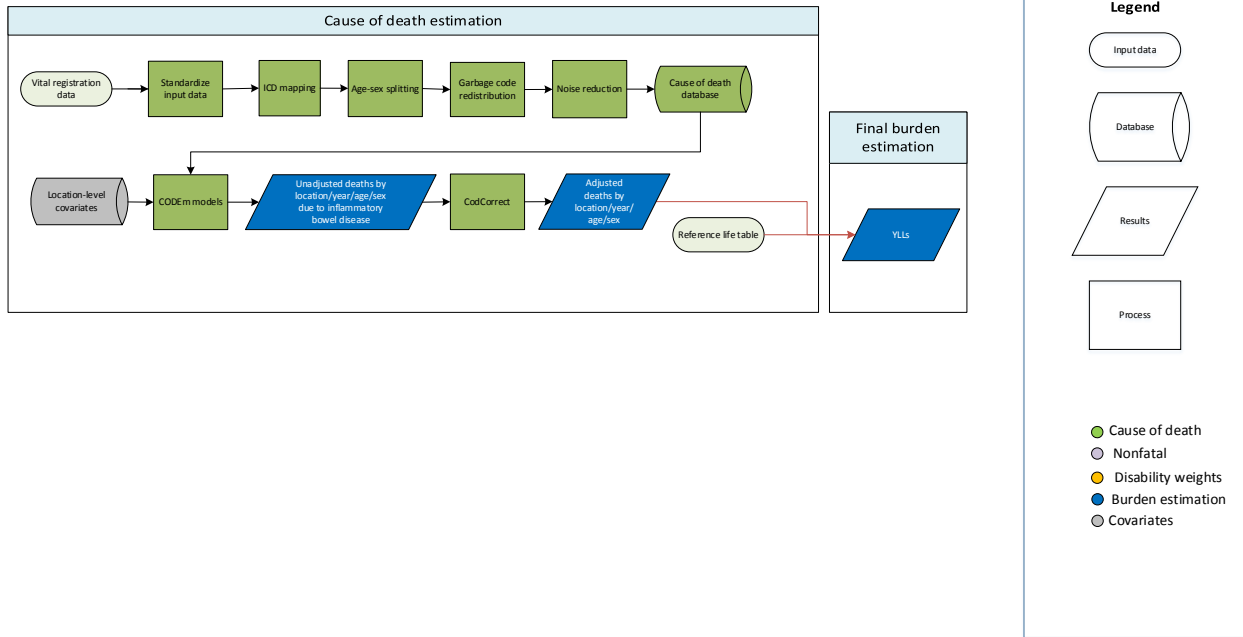

## Input data

Vital registration data were used to model this cause. We outliered data in instances where garbage code redistribution and noise reduction, in combination with small sample sizes, resulted in unreasonable cause fractions, and data that violated well-established time or age trends.

## Modeling strategy

We modeled deaths due to inflammatory bowel disease with a standard CODEm model using the cause of death database and location-level covariates as inputs. The model followed standard parameters, with the exception that the start age of the model was 1 year old instead of 0 and the linear floor rate was lowered to 0.0001 in order to better capture low data. We hybridized separate global and data-rich models to acquire unadjusted results, which we finalized and adjusted using CodCorrect to reach final YLLs due to inflammatory bowel disease. There were no significant changes in the modeling process between GBD 2013 and GBD 2015.

## Vascular Intestinal Disorders

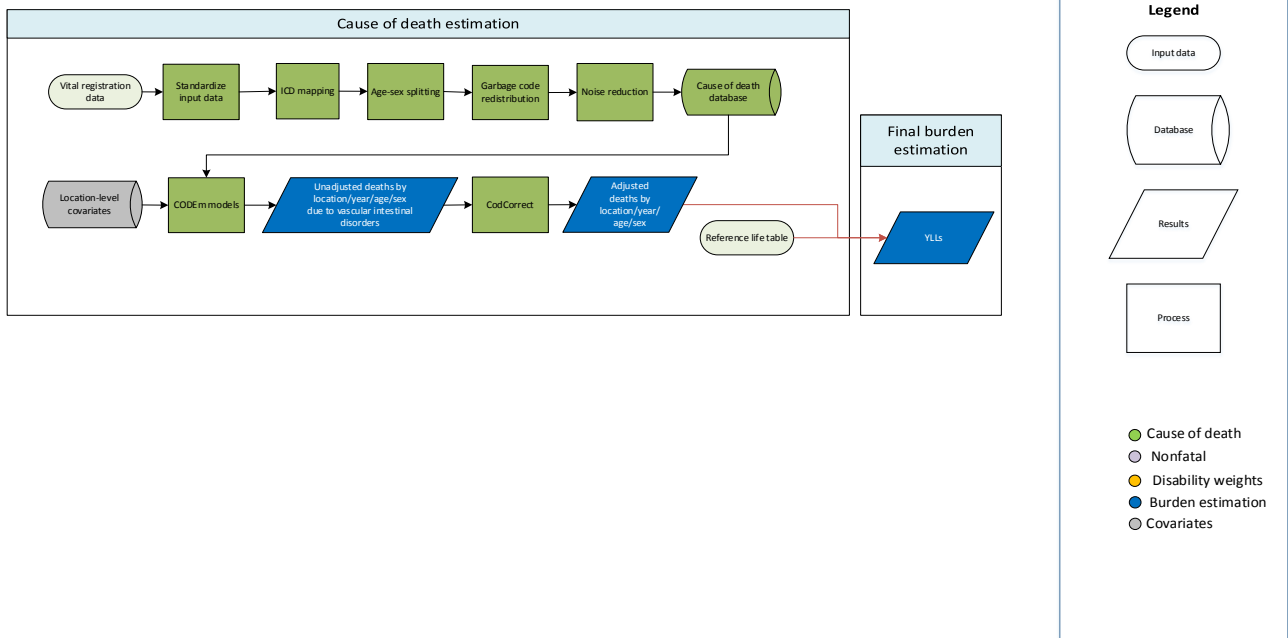

### Input data

Vital registration data were used to model this cause. We outliered data in instances where garbage code redistribution and noise reduction, in combination with small sample sizes, resulted in unreasonable cause fractions; and data that violated well-established time or age trends.

### Modeling strategy

We modeled deaths due to vascular intestinal disorders with a standard CODEm model using the cause of death database and location-level covariates as inputs. The model followed standard parameters, with the exception that the start age of the model was 1 year old instead of 0 and the linear floor rate was lowered to 0.0001 in order to better capture low data. We hybridized separate global and data-rich models to acquire unadjusted results, which we finalized and adjusted using CodCorrect to reach final YLLs due to vascular intestinal disorders. There were no significant changes in the modeling process between GBD 2013 and GBD 2015.

## Gallbladder and biliary diseases

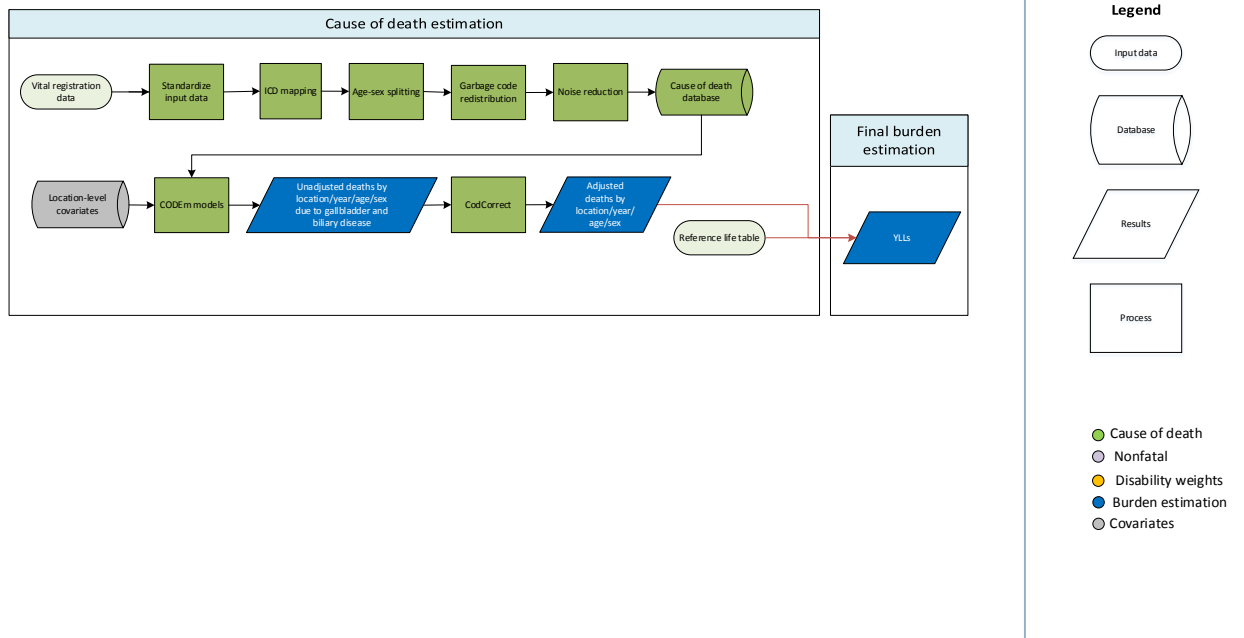

### Input data

Vital registration data were used to model this cause. We outliered data in instances where garbage code redistribution and noise reduction, in combination with small sample sizes, resulted in unreasonable cause fractions; and data that violated well-established time or age trends.

### Modeling strategy

We modeled deaths due to gallbladder and biliary diseases with a standard CODEm model using the cause of death database and location-level covariates as inputs. The model followed standard parameters, with the exception that the start age of the model was 1 year old instead of 0 and the linear floor rate was lowered to 0.0001 in order to better capture low data. We hybridized separate global and data rich models to acquire unadjusted results, which we finalized and adjusted using CodCorrect to reach final YLLs due to gallbladder and biliary diseases. There were no significant changes in the modeling process between GBD 2013 and GBD 2015.

## Pancreatitis

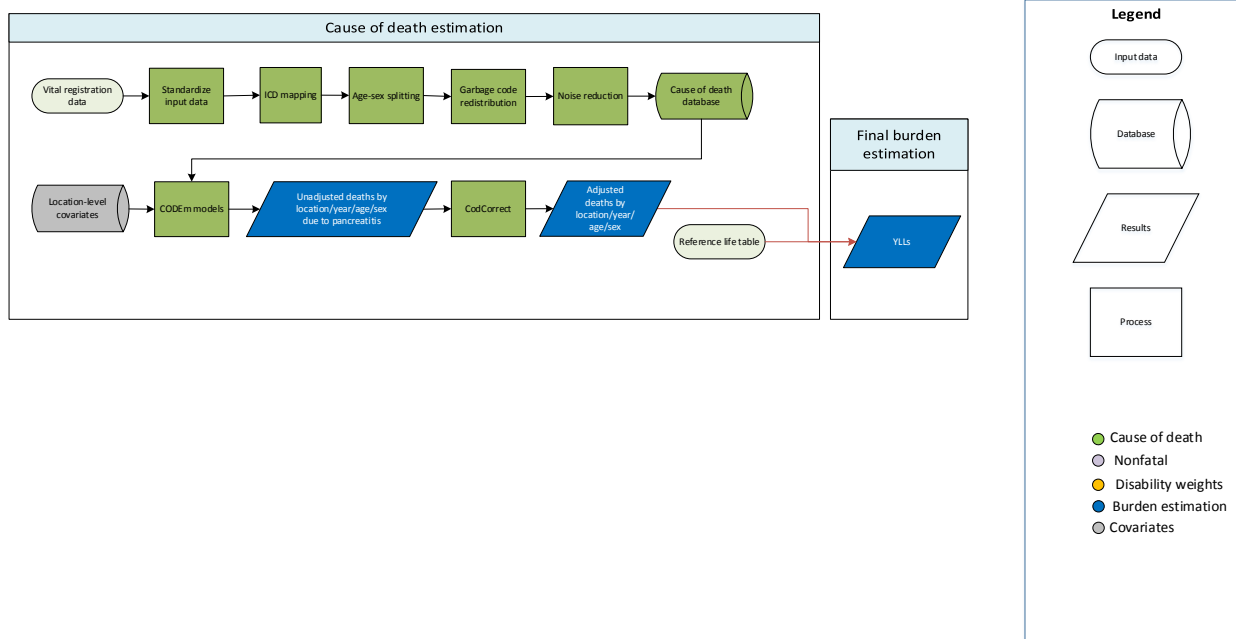

### Input data

Vital registration data were used to model this cause. We outliered data in instances where garbage code redistribution and noise reduction, in combination with small sample sizes, resulted in unreasonable cause fractions, and data that violated well-established time or age trends.

### Modeling strategy

We modeled deaths due to pancreatitis with a standard CODEm model using the cause of death database and location-level covariates as inputs. The model followed standard parameters, with the exception that the start age of the model was 1 year old instead of 0 and the linear floor rate was lowered to 0.0001 in order to better capture low data. We hybridized separate global and data-rich models to acquire unadjusted results, which we finalized and adjusted using CodCorrect to reach final YLLs due to pancreatitis. There were no significant changes in the modeling process between GBD 2013 and GBD 2015.

## Other digestive diseases

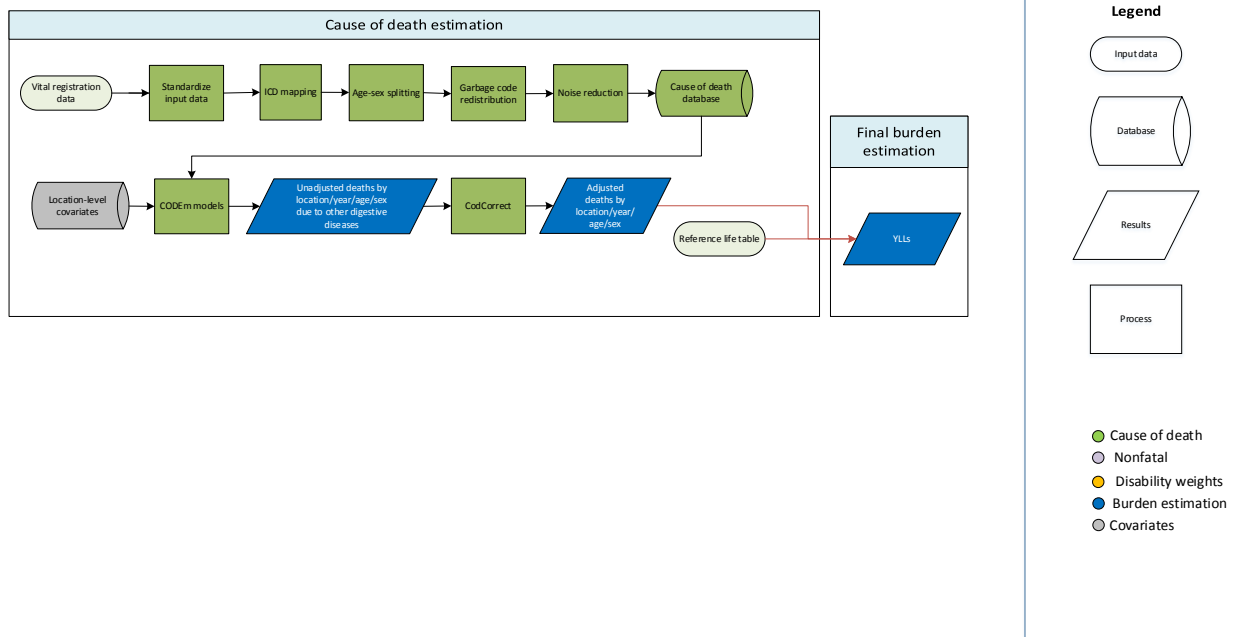

### Input data

Vital registration data were used to model this cause. We outliered data in instances where garbage code redistribution and noise reduction, in combination with small sample sizes, resulted in unreasonable cause fractions; and data that violated well-established time or age trends.

### Modeling strategy

We modeled deaths due to other digestive diseases with a standard CODEm model using the cause of death database and location-level covariates as inputs. The model followed standard parameters, with the exception that the start age of the model was 1 year old instead of 0. We hybridized separate global and data-rich models to acquire unadjusted results, which we finalized and adjusted using CodCorrect to reach final YLLs due to other digestive diseases. There were no significant changes in the modeling process between GBD 2013 and GBD 2015.

## Parkinson Disease

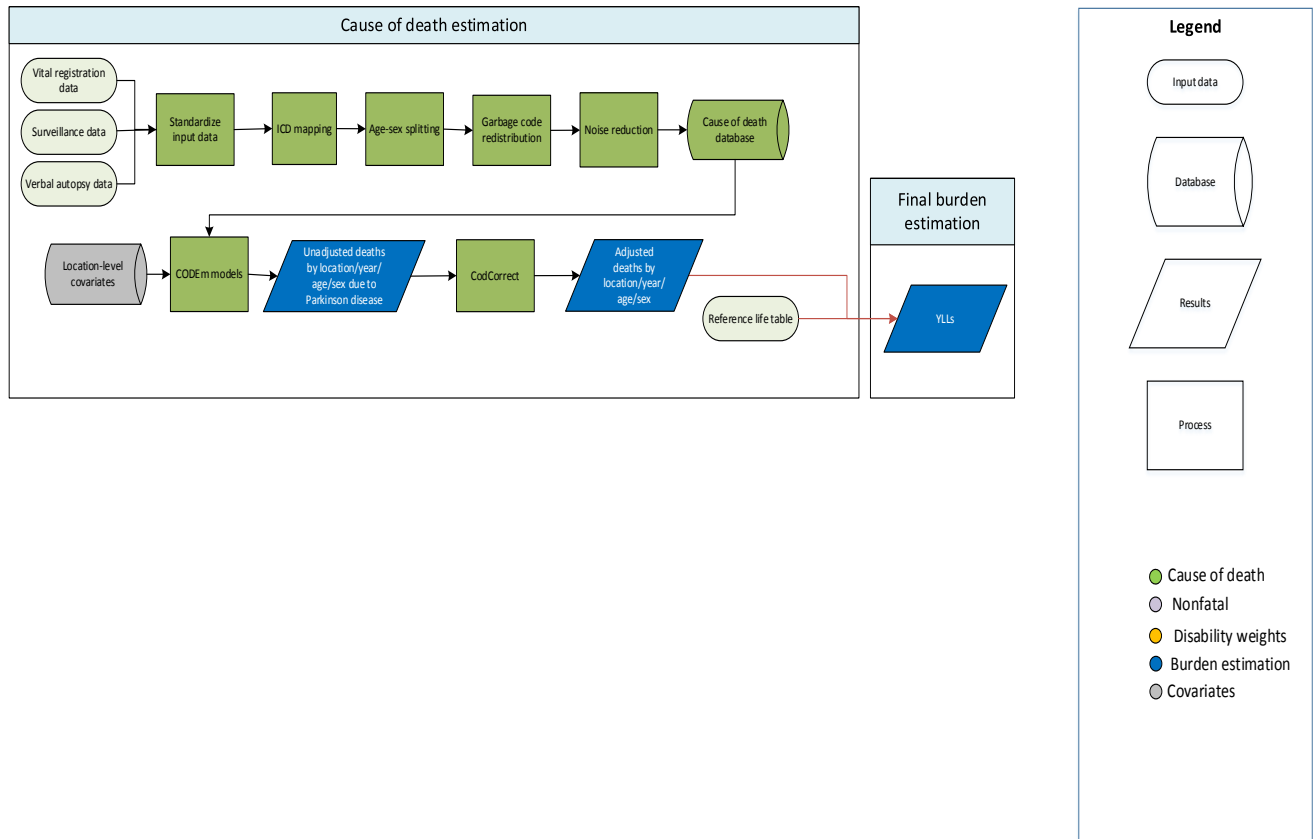

### Input data

Data used to estimate Parkinson disease included vital registration, surveillance, and verbal autopsy data from the cause of death (COD) database. Our outlier criteria excluded data points that (1) were implausibly high or low, (2) substantially conflicted with established age or temporal patterns, or (3) significantly conflicted with other data sources conducted from the same locations or locations with similar characteristics (i.e., Socio-Demographic Index).

Regarding data preparation, a change from GBD 2013 is that Parkinson disease no longer receives garbage-coded deaths during the redistribution process. This change slightly reduces the number of uncorrected deaths but otherwise preserves the observed age and temporal patterns.

### Modeling strategy

The standard CODEm modeling approach was applied to estimate deaths due to Parkinson disease. Separate models were conducted for male and female mortality, and the age range for both models was



20–80+ years. There were no substantial changes from GBD 2013. The covariates used in GBD 2013 have been retained for this iteration, with the addition of the Socio-Demographic Index (SDI) covariate.

# Epilepsy

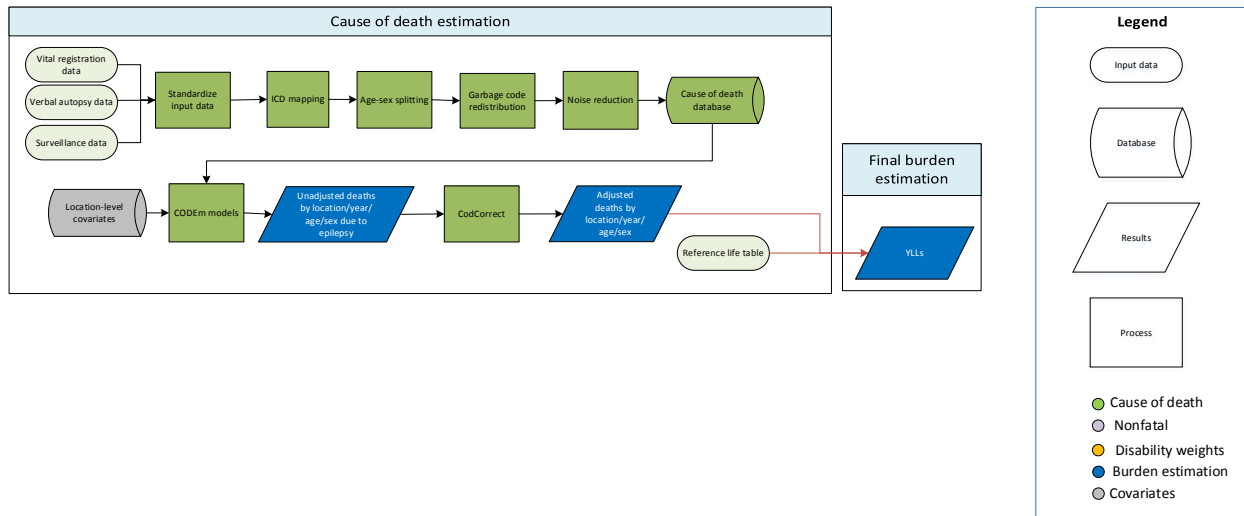

## Input data

Data used to estimate epilepsy mortality included vital registration (VR), verbal autopsy, and China disease surveillance point data from the cause of death (COD) database. Our outlier criteria excluded data points that were implausibly high or low relative to global or regional patterns, substantially conflicted with established age or temporal patterns, or significantly conflicted with other data sources based from the same locations or locations with similar characteristics (i.e., Socio-Demographic Index).

Based on these criteria, we excluded ICD-9 BTL data for Sri Lanka, Fiji, and Kiribati as the estimates varied from year to year between zero and high values. We also outliered all VR data for Eastern Cape for ages 15-74 as this was a single province in South Africa for which the HIV correction (i.e., removing excess deaths due to a cause during the HIV/AIDS epidemic compared to pre-epidemic years) was inadequate and caused this province to be an extremely high outlier globally.

## Modeling strategy

The standard CODEm modeling approach was applied to estimate deaths due to epilepsy. We applied the same covariates used in GBD 2013 but added the Socio-Demographic Index (SDI) variable created for this GBD cycle and the standardized exposure variable scalar (SEV-Scalar) for epilepsy. This covariate reflected the level of epilepsy burden attributed to alcohol (the only risk estimated for epilepsy). Otherwise, there were no changes from the GBD 2013 modeling strategy.

## Multiple Sclerosis

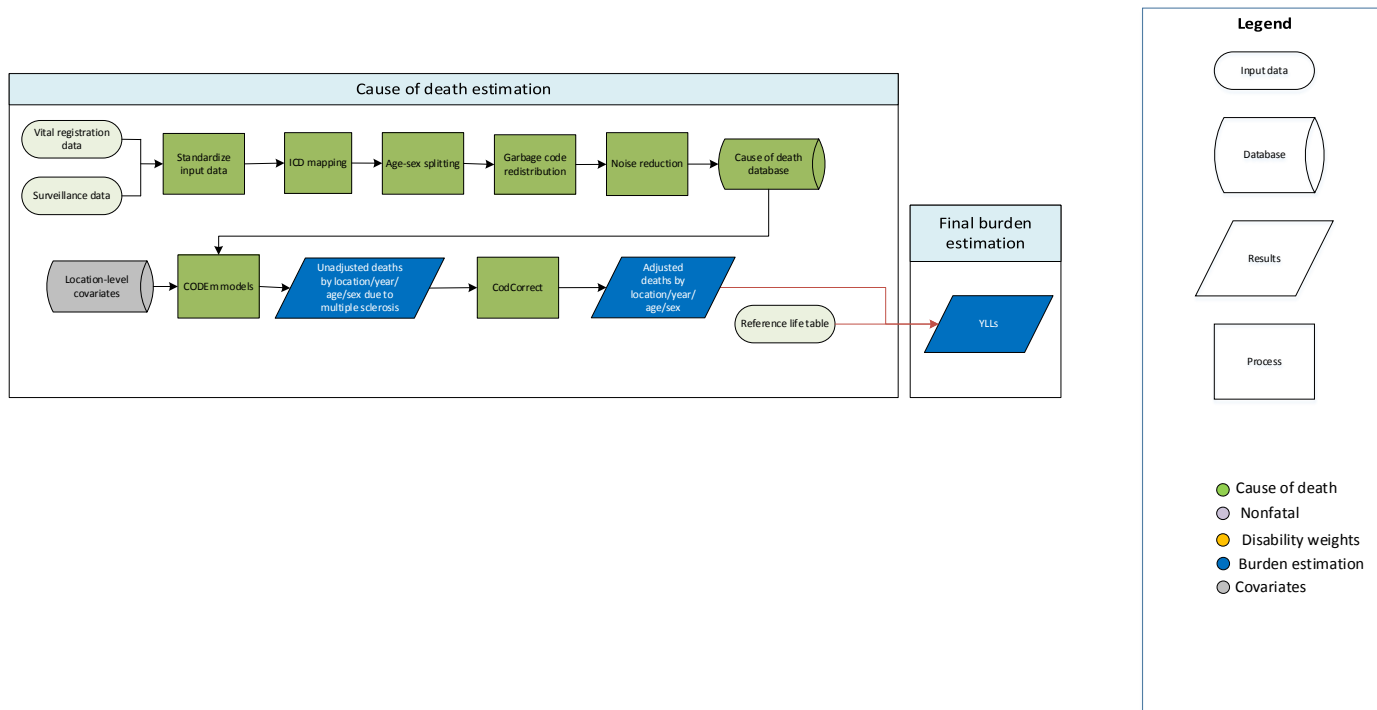

### Input data

Data used to estimate multiple sclerosis included vital registration and surveillance data from the cause of death (COD) database. Our outlier criteria excluded data points that (1) were implausibly high or low, (2) substantially conflicted with established age or temporal patterns, or (3) significantly conflicted with other data sources conducted from the same locations or locations with similar characteristics (i.e., Socio-Demographic Index).

### Modeling strategy

The standard CODEm modeling approach was used to estimate deaths due to multiple sclerosis. Separate models were conducted for male and female mortality, and the age range for both models was 20–80+ years. There were no substantial changes from GBD 2013. The covariates used in GBD 2013 have been retained for this iteration, with the addition of the Socio-Demographic Index (SDI) covariate.

## Motor Neuron Disease

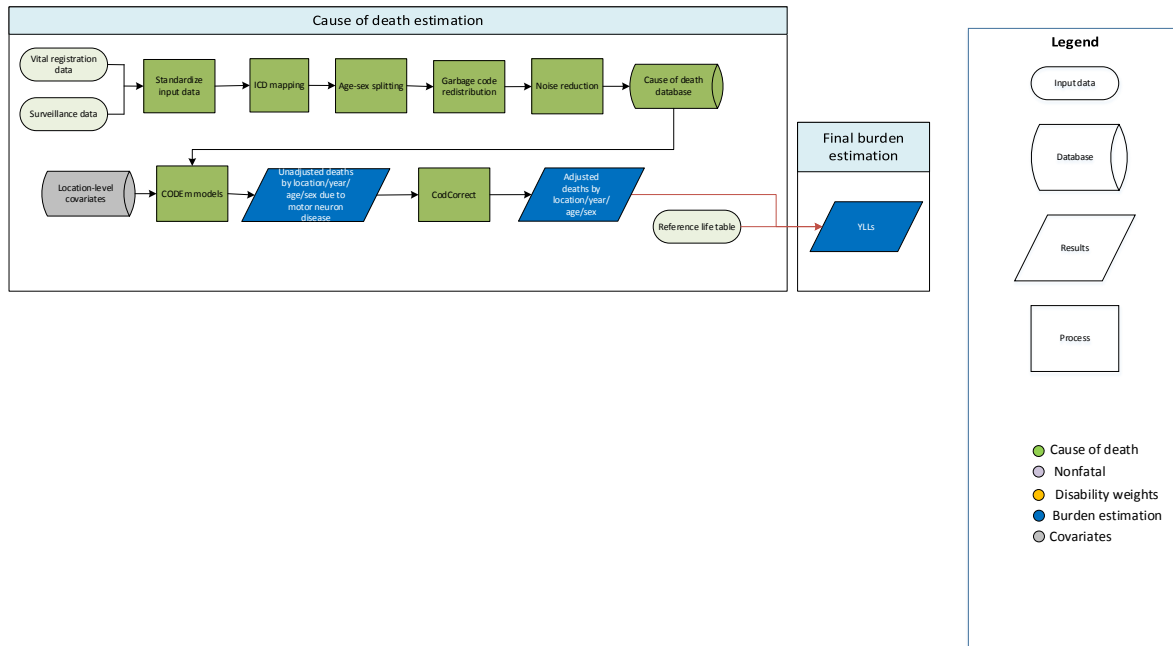

### Input data

Data used to estimate motor neuron disease mortality included vital registration and surveillance data from the cause of death (COD) database. Our outlier criteria excluded data points that (1) were implausibly high or low, (2) substantially conflicted with established age or temporal patterns, or (3) significantly conflicted with other data sources conducted from the same locations or locations with similar characteristics (i.e., Socio-Demographic Index).

### Modeling strategy

Previously, deaths due to motor neuron disease (MND) were classified and modeled under Other Neurological Disorders. For GBD 2015, we elevated MND deaths to their own cause. We used the standard CODEm modeling approach to generate estimates of deaths due to MND for ages 0 days–80+ years. The covariate structure of the MND model is very similar to other neurological causes and takes into account geographic factors (e.g., latitude), infrastructure (water and sanitation, health systems access), and socioeconomic variables (e.g. lag distributed income).

## Other Neurological Disorders

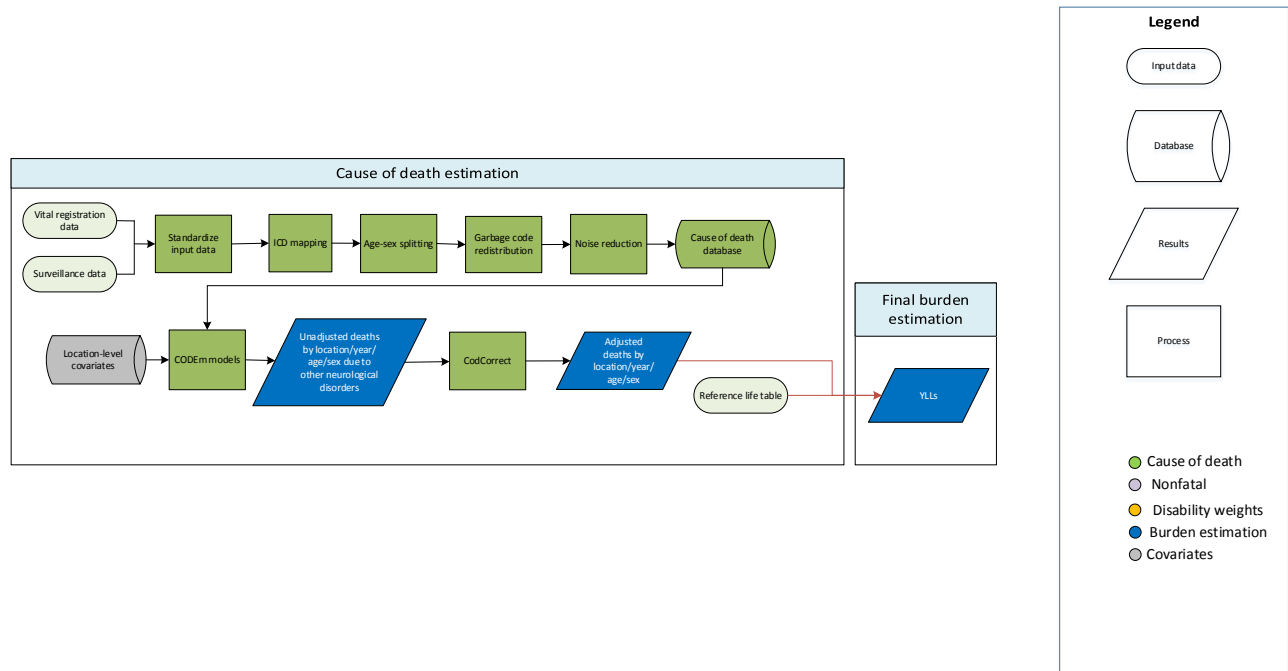

### Input data

Data used to estimate other neurological disorders included vital registration and surveillance data from the cause of death (COD) database. Our outlier criteria excluded data points that (1) were implausibly high or low, (2) substantially conflicted with established age or temporal patterns, or (3) significantly conflicted with other data sources conducted from the same locations or locations with similar characteristics (i.e., Socio-Demographic Index).

Relative to GBD 2013, the main data related change to other neurological disorders is the removal of deaths due to motor neuron disease (MND) – a function of MND becoming a separate cause. This resulted in a reduction of our mortality estimates for other neurological disorders.

### Modeling strategy

The standard CODEm modeling approach was applied to estimate deaths due to other neurological disorders. Male and female CODEm models were run for deaths occurring between ages 28 days to 80+ years.

Although the covariate list remains essentially unchanged from GBD 2013, a number of covariates have received substantial updates (all received some updates). Metabolic values (e.g., BMI), smoking-based covariates, health systems access, and meat-based dietary energy consumption received the greatest overhaul of the covariates informing this model. The Socio-Demographic Index (SDI) covariate was added to the GBD 2015 covariate set.

# Schizophrenia

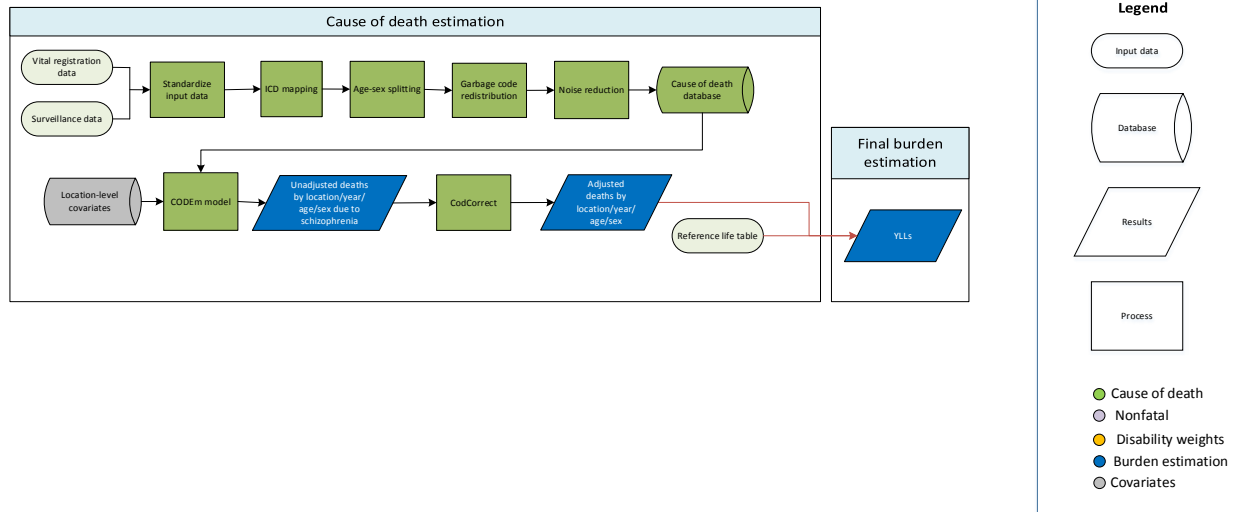

## Input data

Data used to estimate deaths due to schizophrenia included centrally prepped vital registration and surveillance sources from the cause of death (COD) database. Per our outlier criteria, data from countries with sparse yet heterogeneous data were excluded as the data exaggerated fluctuations in deaths and gave implausible regional patterns. Excluded data were typically from lower-income countries.

## Modeling strategy

Cause of death modeling for schizophrenia followed the general CODEm strategy. Age was restricted to deaths occurring between 25 and 80+ years. There were no substantial changes from GBD 2013; the same set of covariates were used with the addition of the Socio-Demographic Index (SDI) variable.

Limitations in modelling schizophrenia stem from cause attribution issues; for instance, varying practices in coding deaths can lead to misattribution (i.e., miscoding schizophrenia deaths to injuries). This trend can explain some of the geographical variations observed for schizophrenia mortality rates, which we will explore further in upcoming iterations of GBD.

## Alcohol use disorders

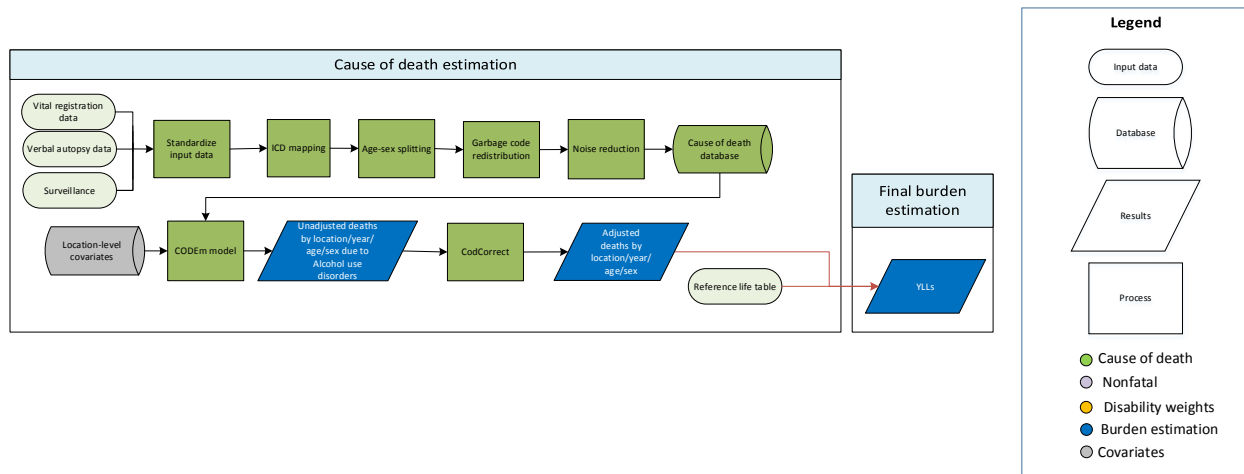

### Input data

Data used to estimate deaths due to alcohol use disorders included centrally prepped vital registration, Chinese disease surveillance point (DSP) and verbal autopsy sources from the cause of death (COD) database. Per our outlier criteria, data from countries with sparse yet heterogeneous data were excluded as the data exaggerated fluctuations in deaths and gave implausible regional patterns. Excluded data were typically from lower-income countries.

### Modeling strategy

Cause of death modeling for alcohol use disorders followed the general CODEm strategy. Age was restricted to deaths occurring between 15 and 80+ years. There were no substantial changes from GBD 2013; however, a review of model covariates was undertaken based on empirical evidence and expert feedback, which resulted in a new set of model covariates for GBD 2015. Additions included a prevalence of binge alcohol drinking covariate and the Socio-Demographic Index (SDI) variable. Based on expert consultation, we excluded the mean body mass index (BMI), mean cholesterol per capita, mean systolic blood pressure (mmHg), and red meat (kcal per capita) covariates from GBD 2015 as they provided no observable benefit to the model.

Limitations in modeling alcohol use stem from cause attribution issues; for instance, varying practices in coding deaths related to substance use disorders can lead to misattribution (i.e., miscoding alcohol-related deaths to cardiovascular diseases). This poses challenge to our redistribution strategy; however, we will continue to refine our approach in future iterations of GBD.

## Drug use disorders

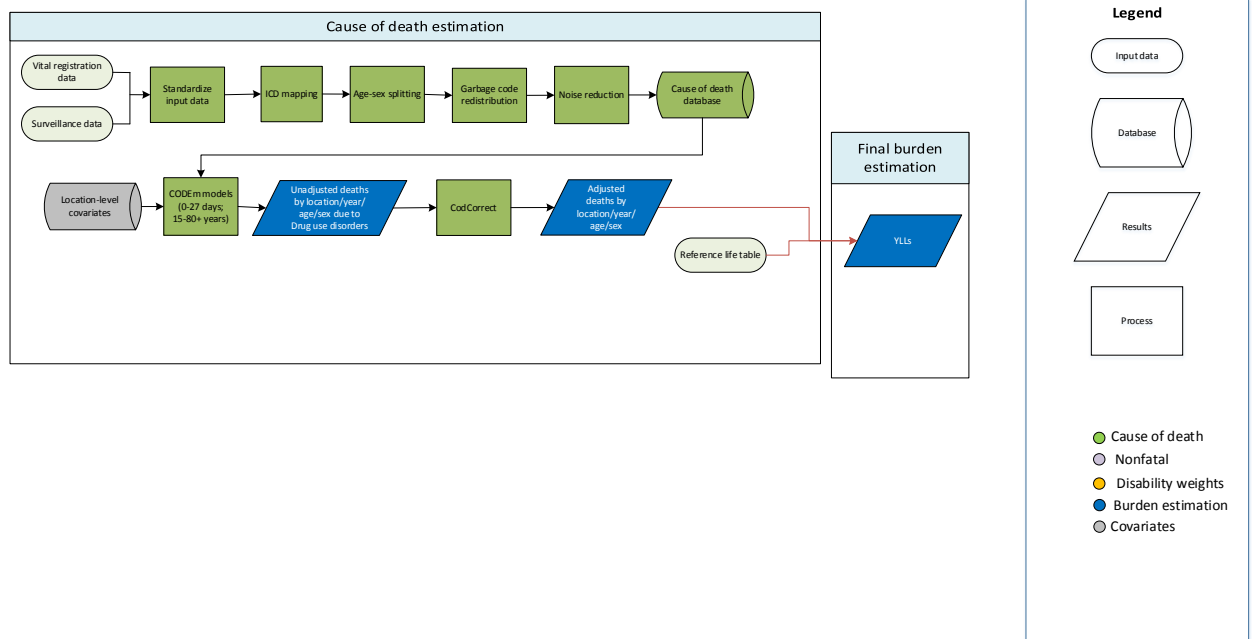

### Input data

Data used to estimate deaths due to drug use disorders included centrally prepped vital registration and surveillance sources from the cause of death (COD) database. Per our outlier criteria, data from countries with sparse yet heterogeneous data were excluded as the data exaggerated fluctuations in deaths and gave implausible regional patterns. Excluded data were typically from lower-income countries.

### Modelling strategy

Drug use disorders were modelled using the general CODEm approach and included the child models opioid use disorders, cocaine use disorders, amphetamine use disorders, and other drug use disorders. Drug use disorders were modelled separately in CODEm for deaths occurring between age 0 days and 27 days, and deaths occurring between age 15 and 80+ years.

In GBD 2013, the parent drug use disorders CODEm model was split proportionately into its constituent parts (opioid use disorders, cocaine use disorders, amphetamine use disorders, and other drug use disorders) through a custom process that used region/year/age/sex-specific vital registration data. In GBD 2015, sufficient data permitted a revised strategy to model individual drug use disorders through CODEm within the parent drug use envelope.



In GBD 2015, we sought to refine our redistribution strategy to more accurately represent unspecified poisoning deaths. Upon close review of ICD-coded deaths for unspecified poisoning, we identified a specific age-pattern, in which the death rate spiked in ages 15 to 50 years. Noting this trend, we conducted further review of data and found that these deaths were likely due to drug use disorders. We then redistributed unspecified poisoning deaths to drug use disorders in accordance with the appropriate age and sex pattern. Based on high-quality ICD-9 and ICD-10 data, we then reassigned these deaths to the drug use disorder sub-causes.

## Opioid use disorders

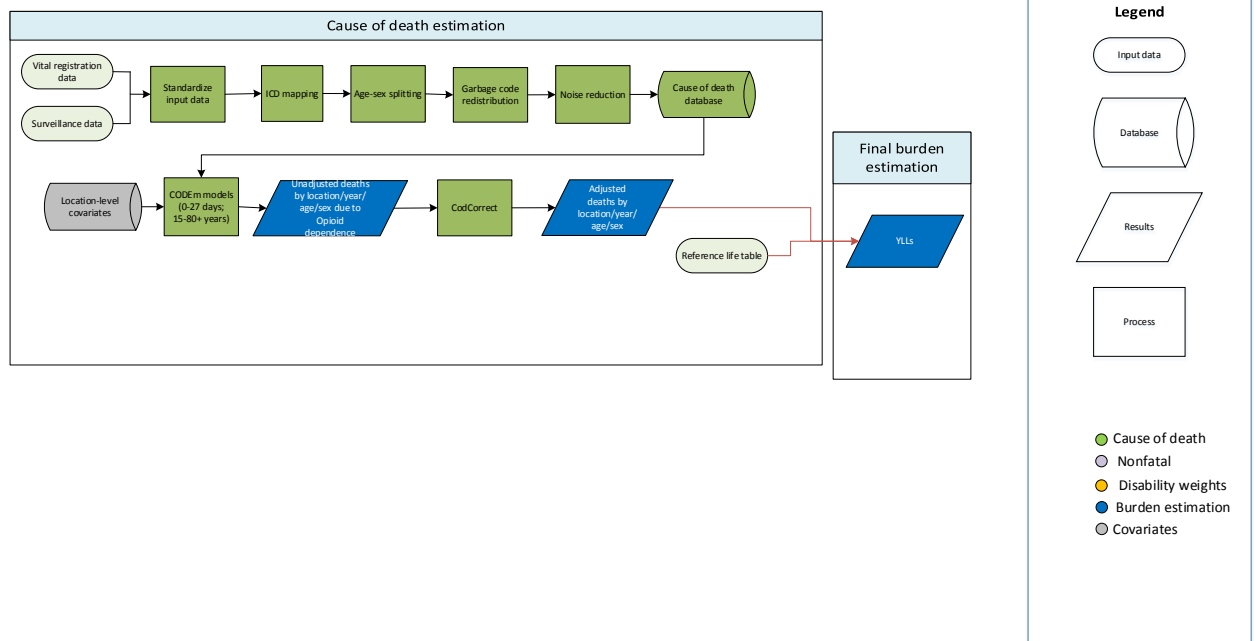

### Input data

Data used to estimate deaths due to opioid use disorders included centrally prepped vital registration and China Disease Surveillance Points (DSP) sources from the cause of death (COD) database. Per our outlier criteria, data from countries with sparse yet heterogeneous data were excluded as the data exaggerated fluctuations in deaths and gave implausible regional patterns. Excluded data were typically from lower-income countries.

### Modelling strategy

Opioid use disorders were modelled using the general CODEm approach and came under the parent drug use disorders model. Opioid use disorders were modelled separately in CODEm for deaths occurring between ages 0 days and 27 days, and deaths occurring between ages 15 and 80+ years.

In GBD 2013, the parent drug use disorders CODEm model was split proportionately into its constituent parts (opioid use disorders, cocaine use disorders, amphetamine use disorders, and other drug use disorders) through a custom process that used region/year/age/sex-specific vital registration data. In GBD 2015, sufficient data permitted a revised strategy to model individual drug use disorders through CODEm within the parent drug use envelope.

In GBD 2015, we sought to refine our redistribution strategy to more accurately represent unspecified poisoning deaths. Upon close review of ICD-coded deaths for unspecified poisoning, we identified a specific age-pattern, in which the death rate spiked in ages 15 to 50 years. Noting this trend, we conducted further review of data and found that these deaths were likely due to drug use disorders. We then redistributed unspecified poisoning deaths to drug use disorders in accordance with the appropriate age and sex pattern. Based on high-quality ICD-9 and ICD-10 data, we then reassigned these deaths to the drug use disorder sub-causes.

Through literature review, we also found that opioid-related dependency was a large contributor to deaths previously attributed to the residual “other drug use” category.<sup>1-9</sup> Noting this evidence, we redistributed a large portion of the “other drug use” deaths to the “opioid use disorder” category.

## References

- 1 Australian Bureau of Statistics. Drug Induced Deaths, Australia, 1991-2001. 2003; published online July 15.  
<http://www.abs.gov.au/ausstats/abs@.nsf/productsbytopic/E32F06E91C80389DCA256D640001E0FF?OpenDocument#6.%20TYPES%20OF%20DRUGS>; (accessed April 20, 2016).
- 2 Darke S. The life of the heroin user: typical beginnings, trajectories and outcomes. Cambridge, UK: Cambridge University Press, 2010.
- 3 Darke S, Duflou J, Torok M. The comparative toxicology and major organ pathology of fatal methadone and heroin toxicity cases. *Drug Alcohol Depend* 2010; **106**: 1–6.
- 4 Darke S, Kaye S, Duflou J. Comparative cardiac pathology among deaths due to cocaine toxicity, opioid toxicity and non-drug-related causes. *Addict Abingdon Engl* 2006; **101**: 1771–7.
- 5 Kaye S, McKetin R, Duflou J, Darke S. Methamphetamine and cardiovascular pathology: a review of the evidence. *Addict Abingdon Engl* 2007; **102**: 1204–11.
- 6 Stenhouse G, Stephen D, Grieve JHK. Blood free morphine levels vary with concomitant alcohol and benzodiazepine use. *J Clin Forensic Med* 2004; **11**: 285–8.
- 7 Karch SB. Karch’s Pathology of Drug Abuse, Third Edition. Boca Raton, Florida: CRC Press, 2002.
- 8 Karch SB. Karch’s Pathology of Drug Abuse, Fourth Edition. Boca Raton, Florida: CRC Press, 2009.
- 9 Coffin PO, Galea S, Ahern J, Leon AC, Vlahov D, Tardiff K. Opiates, cocaine and alcohol combinations in accidental drug overdose deaths in New York City, 1990-98. *Addict Abingdon Engl* 2003; **98**: 739–47.

## Cocaine use disorders

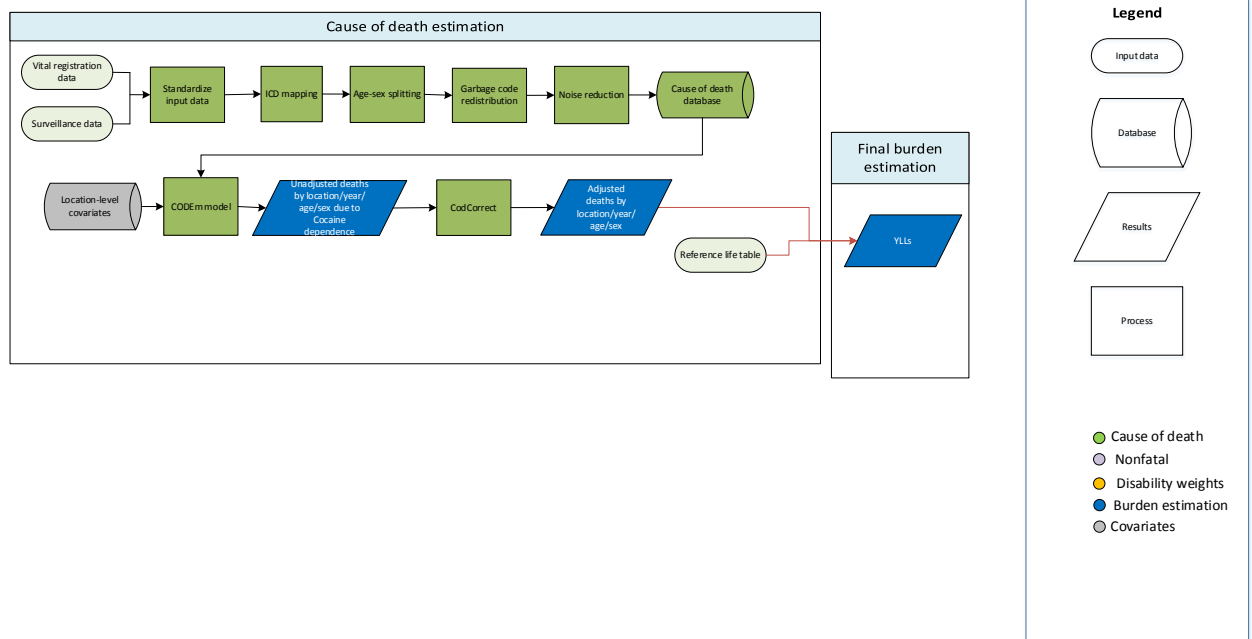

### Input data

Data used to estimate deaths due to cocaine use disorders included centrally prepped vital registration and surveillance sources from the cause of death (COD) database. Per our outlier criteria, data from countries with sparse yet heterogeneous data were excluded as the data exaggerated fluctuations in deaths and gave implausible regional patterns. Excluded data were typically from lower-income countries.

### Modeling strategy

Cocaine use disorders were modelled using the general CODEm approach and came under the drug use disorders parent model. Age was restricted to deaths occurring between 15 and 80+ years.

In GBD 2013, the parent drug use disorders CODEm model was split proportionately into its constituent parts (opioid use disorders, cocaine use disorders, amphetamine use disorders, and other drug use disorders) through a custom process that used region/year/age/sex-specific vital registration data. In GBD 2015, sufficient data permitted a revised strategy to model individual drug use disorders through CODEm within the parent drug use envelope.

In GBD 2015, we sought to refine our redistribution strategy to more accurately represent unspecified poisoning deaths. Upon close review of ICD-coded deaths for unspecified poisoning, we identified a specific age-pattern, in which the death rate spiked in ages 15 to 50 years. Noting this trend, we conducted further review of data and found that these deaths were likely due to drug use disorders. We

then redistributed unspecified poisoning deaths to drug use disorders in accordance with the appropriate age and sex pattern. Based on high-quality ICD-9 and ICD-10 data, we then reassigned these deaths to the drug use disorder sub-causes.

## Amphetamine use disorders

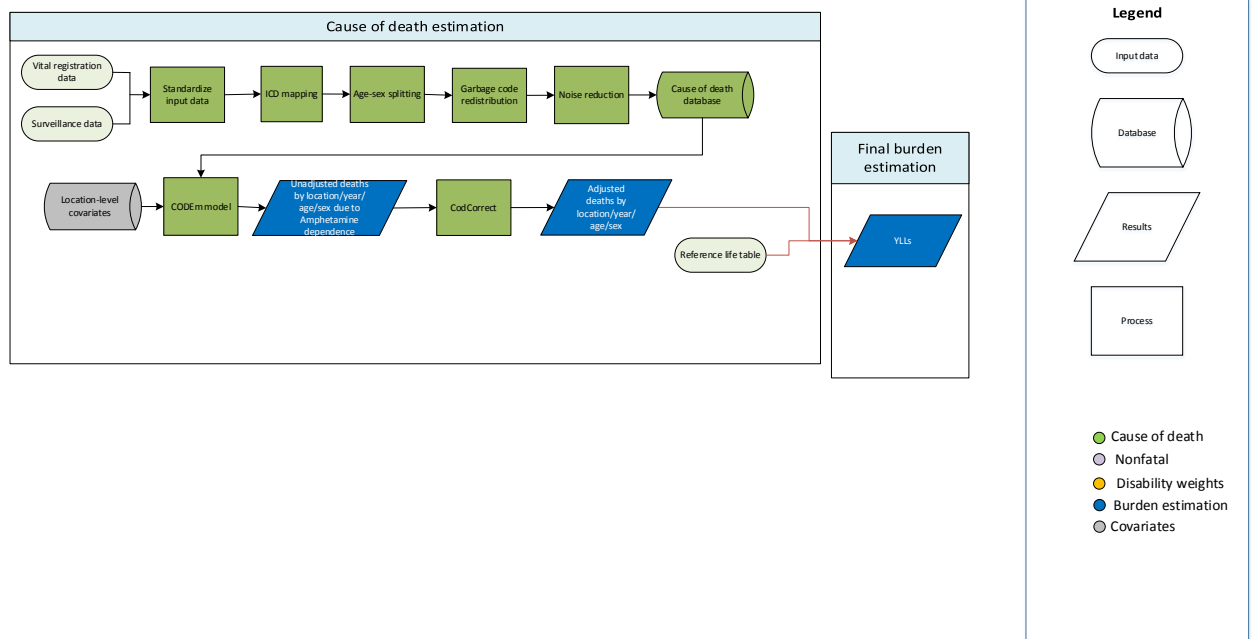

### Input data

Data used to estimate deaths due to amphetamine use disorders included centrally prepped vital registration and surveillance sources from the cause of death (COD) database. Per our outlier criteria, data from countries with sparse yet heterogeneous data were excluded as the data exaggerated fluctuations in deaths and gave implausible regional patterns. Excluded data were typically from lower-income countries.

### Modeling strategy

Amphetamine use disorders were modeled using the general CODEm approach and came under the drug use disorders parent model. Age was restricted to deaths occurring between 15 and 80+ years.

In GBD 2013, the parent drug use disorders CODEm model was split proportionately into its constituent parts (opioid use disorders, cocaine use disorders, amphetamine use disorders, and other drug use disorders) through a custom process that used region/year/age/sex-specific vital registration data. In GBD 2015, sufficient data permitted a revised strategy to model individual drug use disorders through CODEm within the parent drug use envelope.

In GBD 2015, we sought to refine our redistribution strategy to more accurately represent unspecified poisoning deaths. Upon close review of ICD-coded deaths for unspecified poisoning, we identified a specific age-pattern, in which the death rate spiked in ages 15 to 50 years. Noting this trend, we conducted further review of data and found that these deaths were likely due to drug use disorders. We then redistributed unspecified poisoning deaths to drug use disorders in accordance with the

appropriate age and sex pattern. Based on high-quality ICD-9 and ICD-10 data, we then reassigned these deaths to the drug use disorder sub-causes.

## Other drug use disorders

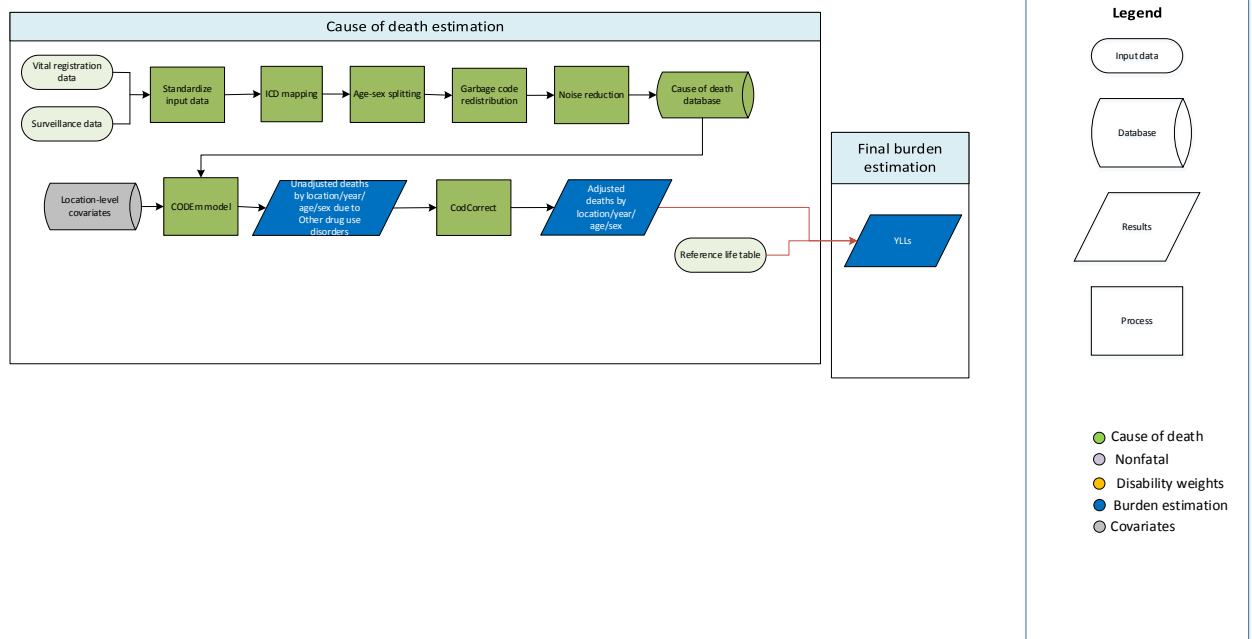

### Input data

Data used to estimate deaths due to other drug use disorders included centrally prepped vital registration and surveillance sources from the cause of death (COD) database. Per our outlier criteria, data from countries with sparse yet heterogeneous data were excluded as the data exaggerated fluctuations in deaths and gave implausible regional patterns. Excluded data were typically from lower-income countries.

### Modelling strategy

Other drug use disorders were modelled using the general CODEm approach and came under the drug use disorders parent model. Age was restricted to deaths occurring between 15 and 80+ years.

In GBD 2013, the parent drug use disorders CODEm model was split proportionately into its constituent parts (opioid use disorders, cocaine use disorders, amphetamine use disorders, and other drug use disorders) through a custom process that used region/year/age/sex-specific vital registration data. In GBD 2015, sufficient data permitted a revised strategy to model individual drug use disorders through CODEm within the parent drug use envelope.

In GBD 2015, we sought to refine our redistribution strategy to more accurately represent unspecified poisoning deaths. Upon close review of ICD-coded deaths for unspecified poisoning, we identified a



specific age-pattern, in which the death rate spiked in ages 15 to 50 years. Noting this trend, we conducted further review of data and found that these deaths were likely due to drug use disorders. We then redistributed unspecified poisoning deaths to drug use disorders in accordance with the appropriate age and sex pattern. Based on high-quality ICD-9 and ICD-10 data, we then reassigned these deaths to the drug use disorder sub-causes.

## Anorexia nervosa

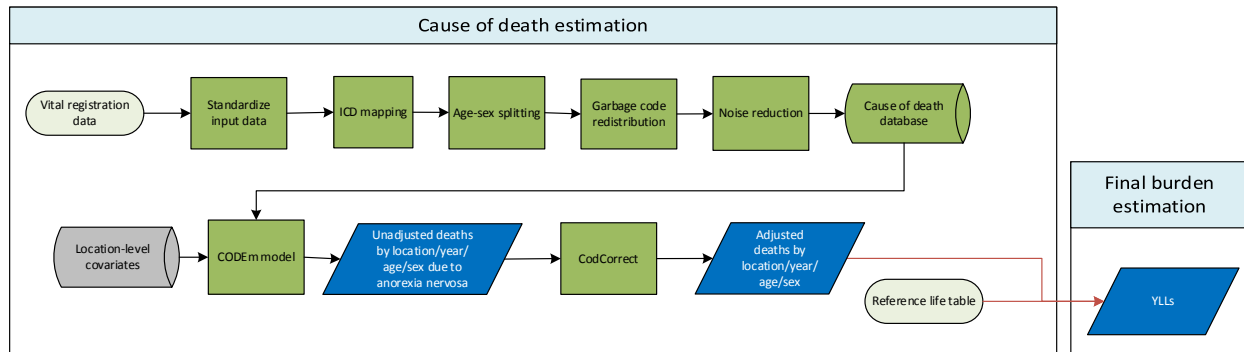

### Input data

Data used to estimate anorexia nervosa mortality included centrally prepped vital registration data from the cause of death (COD) database. Per our outlier criteria, data points from sub-Saharan Africa were excluded as these did not result in a plausible model fit. Additionally, we excluded data from countries with small populations and sparse yet heterogeneous data as these sources exaggerated fluctuations in deaths and gave implausible regional patterns. Data were also excluded from countries including but not limited to Caribbean countries, Oceanic countries, some Central Latin American countries, and other developing countries (particularly those with small populations).

### Modeling strategy

Anorexia nervosa was modeled using the standard CODEm approach and came under the eating disorders parent model. Age was restricted to deaths occurring between 5 and 49 years based on expert advice and patterns of prevalence seen in the non-fatal model. Only one location-level covariate, Socio-Demographic Index, was included in the anorexia nervosa model. A range of other covariates were tested including lagged distributed income, education, maternal education, sanitation, body mass index, and malnutrition. However, these covariates did not improve the model fit and were omitted from the final version.

In GBD 2013, anorexia nervosa deaths were extrapolated from the eating disorders model, which was modeled through a negative binomial approach. In GBD 2015, we changed this strategy and modeled anorexia nervosa deaths through a standard CODEm approach under the overarching eating disorders model as there was no benefit observed from applying the custom approach. As such, it was decided that all eating disorders (eating disorders, anorexia nervosa, and bulimia nervosa) would be modeled using CODEm.

The rate of deaths due to anorexia nervosa is relatively low although we suspect that in many countries, particularly lower-income countries, the coding of deaths to eating disorders is inconsistent. For example, a sharp increase in deaths was seen in the raw data from age 50 onward, which we believe is due to the incorrect assignments of deaths to anorexia nervosa, e.g., deaths from starvation due to dementia being incorrectly assigned to anorexia nervosa. This causes issues when trying to discern

plausible patterns in age and geography. We will explore this further in future iterations of GBD in order to determine how to optimally reflect deaths due to anorexia nervosa.

# Bulimia nervosa

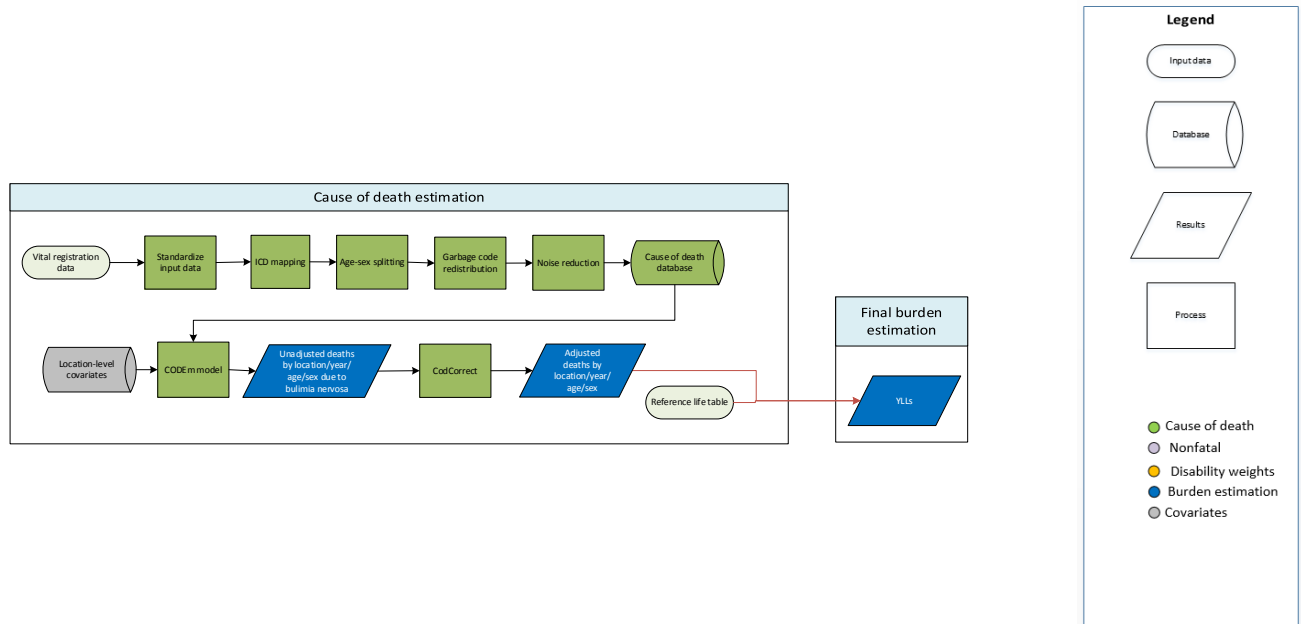

## Input data

Data used to estimate bulimia nervosa mortality included centrally prepped vital registration data from the cause of death (COD) database. Per our outlier criteria, data points from sub-Saharan Africa, Greenland, Malta, and Brunei were excluded as these did not result in a plausible model fit. Additionally, we excluded data from countries with small populations and sparse yet heterogeneous data, as these sources exaggerated fluctuations in deaths and gave implausible regional patterns.

## Modeling strategy

Bulimia nervosa was modeled using the standard CODEm approach and comes under the eating disorders parent model. Age was restricted to deaths occurring between 5 and 49 years based on expert advice and patterns of prevalence seen in the non-fatal model. Only one location-level covariate, Socio-Demographic Index, was included in the bulimia nervosa model. A range of other covariates were tested including lagged distributed income, education, maternal education, sanitation, body mass index, and

malnutrition. However, these covariates did not improve the model fit and were omitted from the final version.

In GBD 2013, bulimia nervosa was not modeled as a distinct cause of death. Any deaths due to bulimia nervosa were attributed to the eating disorders model. We changed this approach in GBD 2015, recognizing bulimia nervosa as an individual cause of death and therefore modeled it as a standard CODEm model under the overarching eating disorders model. This decision was based on observing deaths due to bulimia nervosa in high-quality vital registration data, such as data from the US. These data also include eating disorders not otherwise specified.

The rate of deaths due to bulimia nervosa is relatively low although we suspect that in many countries, particularly lower-income countries, the coding of deaths to eating disorders is inconsistent. Furthermore, the inclusion of deaths due to eating disorders not otherwise specified may add more noise to the model. This causes issues when trying to discern plausible patterns in age and geography. We plan to explore this further in future iterations of GBD in order to determine how to better reflect deaths due to bulimia nervosa.

## Diabetes Mellitus

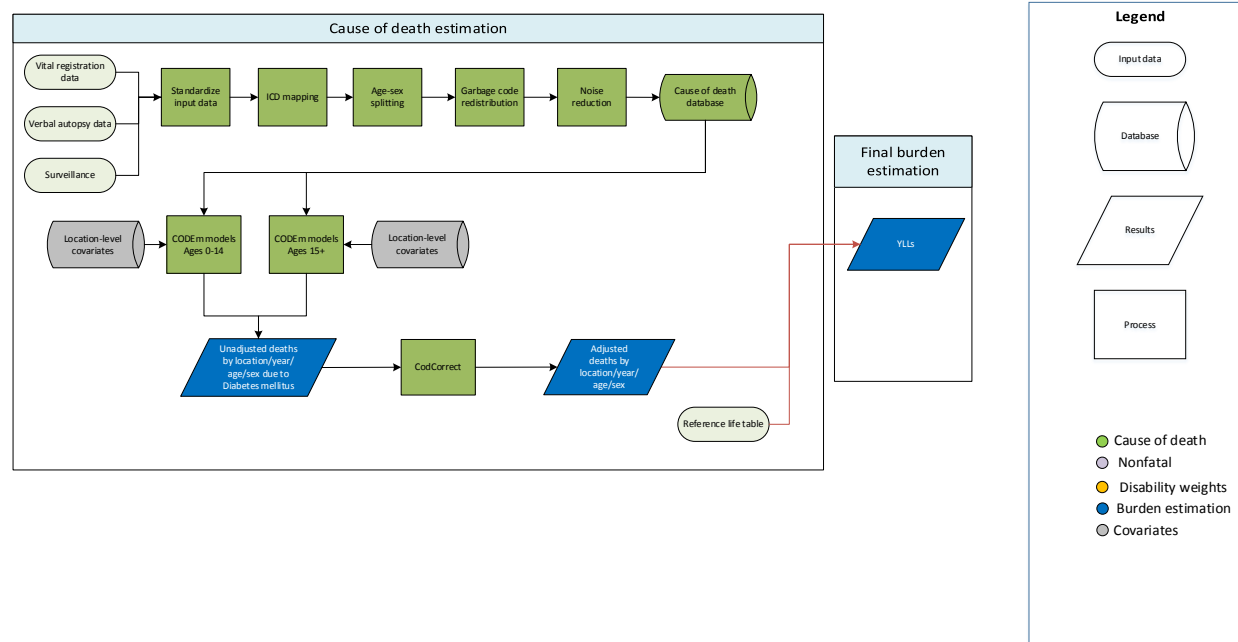

### Input data

**Verbal Autopsy Data:** We outliered VA data points in urban Indian states where high-quality vital registration data were also available. We also outliered data points where the VA data were implausible in all age groups as we determined that these data sources were unreliable.

**Vital Registration Data:** We outliered all data in four urban Indian states where the source of the data was unreliable according to expert opinion. We also outliered ICD9BTL data points which were inconsistent with the rest of the data series and created unlikely time trends.

### Modeling strategy

We used a slight variation on the standard CODEm approach to model deaths from diabetes mellitus. Since deaths in younger age groups are almost exclusively due to Type 1 diabetes while deaths in older ages are primarily due to Type 2, we used two models to estimate overall diabetes deaths. The first is for deaths in 0-14 year olds; the second is for deaths in 15-80+ year olds. In previous iterations of GBD, we used a similar approach, but the two models had age ranges of 0-24 and 25-80+. This change was made due to the increasing prevalence of Type 2 diabetes at younger ages, and thus the increasing likelihood that diabetes-related deaths in the 15-24 year age groups are due to Type 2 diabetes.

We have included two new variables, Socio-Demographic Index and the SEV scalar for diabetes mellitus, as possible covariates for selection in the ensemble modeling process for the model in older ages.

## Acute Glomerulonephritis

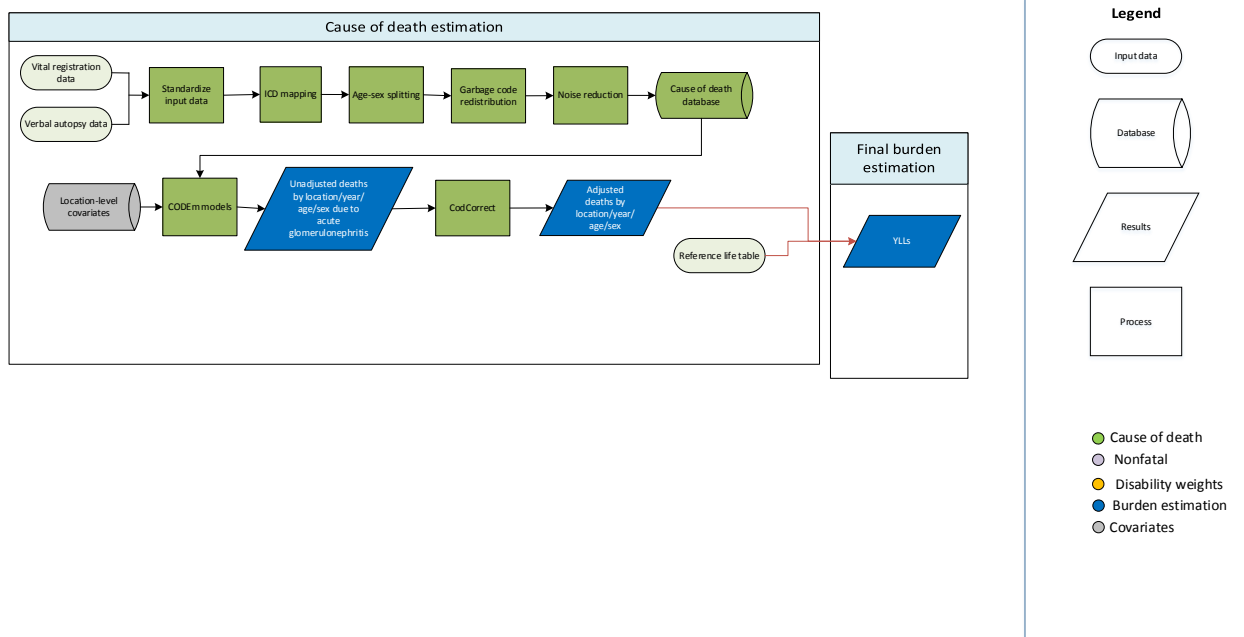

### Input data

Data informing the acute glomerulonephritis estimates include vital registration. Mortality secondary to acute glomerulonephritis is uncommon, thus no literature review was conducted for this cause to identify registry, survey, or literature data. Outliers were identified by systematic examination of data points for all location-years. Data points were determined to be outliers if the data point was extremely low or high out of proportion for the region/year.

### Modeling strategy

The estimation strategy used for fatal acute glomerulonephritis is largely similar to methods used in GBD 2013. Vital registration data were standardized, and mapped according to the GBD causes of death ICD mapping method. These data were then age-sex split, and appropriate redistribution of data was performed using garbage coding. After applying noise reduction, these data were then uploaded to the COD database. Age-restrictions for death estimations secondary to acute glomerulonephritis include 28 days for lower bounds, 80+ for upper bound. Iterations of models were assessed at the location/year/age-group/sex level to determine whether data points merited exclusion via outliering. The estimates are limited by a paucity of data for regions such as Eastern and Central sub-Saharan Africa.

## Urinary diseases and male infertility

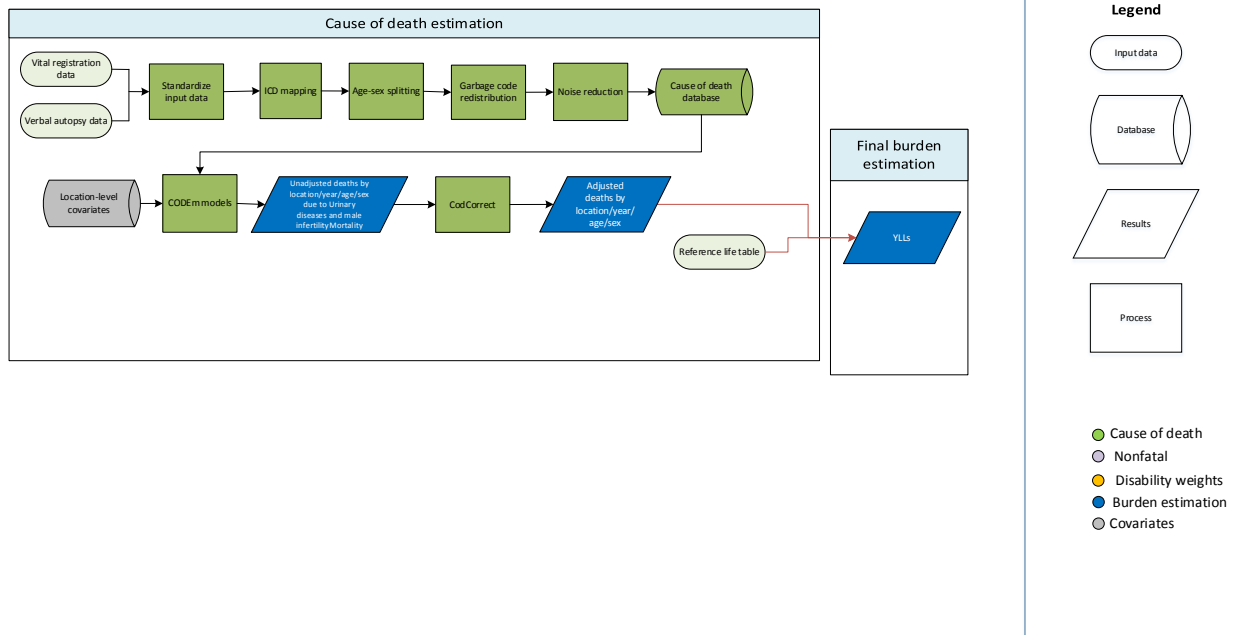

### Input data

Data informing the urinary diseases and male infertility estimates include vital registration and verbal autopsy data. Mortality secondary to urinary diseases and male infertility is uncommon, thus no literature review was conducted for this cause to identify registry, survey, or literature data. Outliers were identified by systematic examination of data points for all location-years. Data points were determined to be outliers if the data point was extremely low or high out of proportion for the region/year. No crosswalks were used for this data analysis.

### Modeling strategy

The estimation strategy used for fatal urinary diseases and male infertility is largely similar to methods used in GBD 2013. Vital registration data were standardized, and mapped according to the GBD COD ICD mapping method. These data were then age-sex split, and appropriate redistribution of data was performed using garbage coding. After applying noise reduction, these data were then uploaded to the COD database. Country-level covariates included in the model are the following: “education,” “health system access 2,” “sanitation,” and “SDI.” Age-restrictions for death estimations secondary to urinary diseases and male infertility include 0 days for lower bounds, 80+ for upper bound. Iterations of models were assessed at the location/year/age-group/sex level to determine whether data points merited exclusion via outliering. The estimates are limited by a paucity of data for regions such as Eastern and Central sub-Saharan Africa. The results of this disease differ by gender as no “male infertility” estimates were performed among women.



## Interstitial Nephritis and Urinary Tract Infections

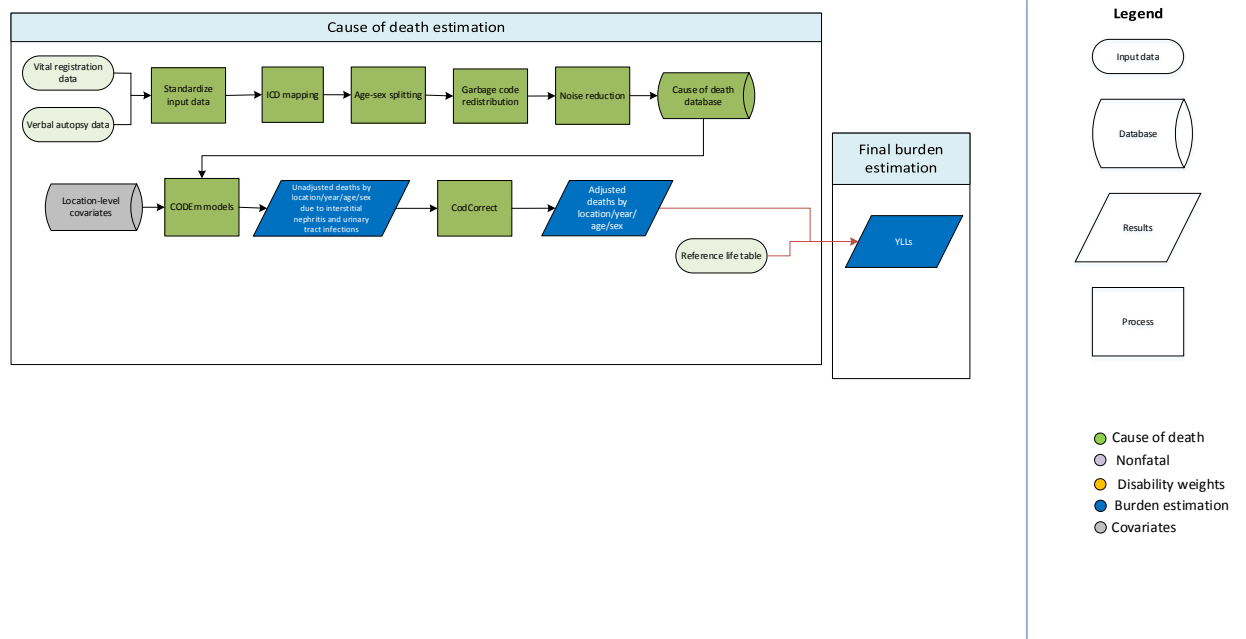

### Input data

Data informing the interstitial nephritis estimates include vital registration and verbal autopsy data. Mortality secondary to interstitial nephritis is uncommon, thus no literature review was conducted for this cause to identify registry, survey, or literature data. Outliers were identified by systematic examination of data points for all location-years. Data points were determined to be outliers if the data point was extremely low or high out of proportion for the region/year. No crosswalks were used for this data analysis.

### Modeling strategy

The estimation strategy used for fatal interstitial nephritis is largely similar to methods used in GBD 2013. Vital registration data were standardized, and mapped according to the GBD COD ICD mapping method. These data were then age-sex split, and appropriate redistribution of data was performed using garbage coding. After applying noise reduction, these data were then uploaded to the COD database. Country-level covariates included in the model are the following: “education,” “health system access 2,” “sanitation,” and “SDI.” Age-restrictions for death estimations secondary to interstitial nephritis include 0 days for lower bounds, 80+ for upper bound. Iterations of models were assessed at the location/year/age-group/sex level to determine whether data points merited exclusion via outliering. The estimates are limited by a paucity of data for regions such as Eastern and Central sub-Saharan Africa.

## Urolithiasis

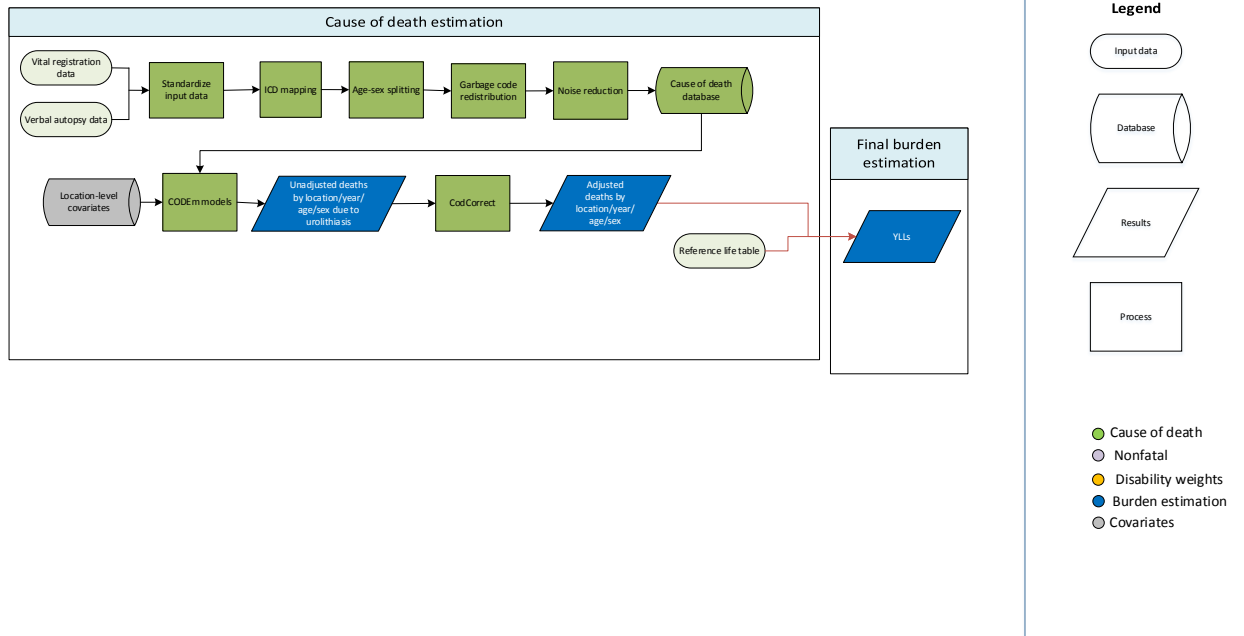

### Input data

Data that informed the urolithiasis estimates include vital registration and verbal autopsy data. Mortality secondary to urolithiasis is uncommon, thus no literature review was conducted for this cause to identify registry, survey, or literature data. Outliers were identified by systematic examination of data points for all location-years. Data points were determined to be outliers if the data point was extremely low or high out of proportion for the region/year.

### Modeling strategy

The estimation strategy used for fatal urolithiasis is largely similar to methods used in GBD 2013. Vital registration data were standardized, and mapped according to the GBD COD ICD mapping method. These data were then age-sex split, and appropriate redistribution of data was performed using garbage coding. After applying noise reduction, these data were then uploaded to the COD database. Age-restrictions for death estimations secondary to urolithiasis include 5 years for lower bounds, 80+ for upper bound. Iterations of models were assessed at the location/year/age-group/sex level to determine whether data points merited exclusion via outliering. The estimates are limited by a paucity of data for regions such as Western sub-Saharan Africa.

## Other urinary diseases

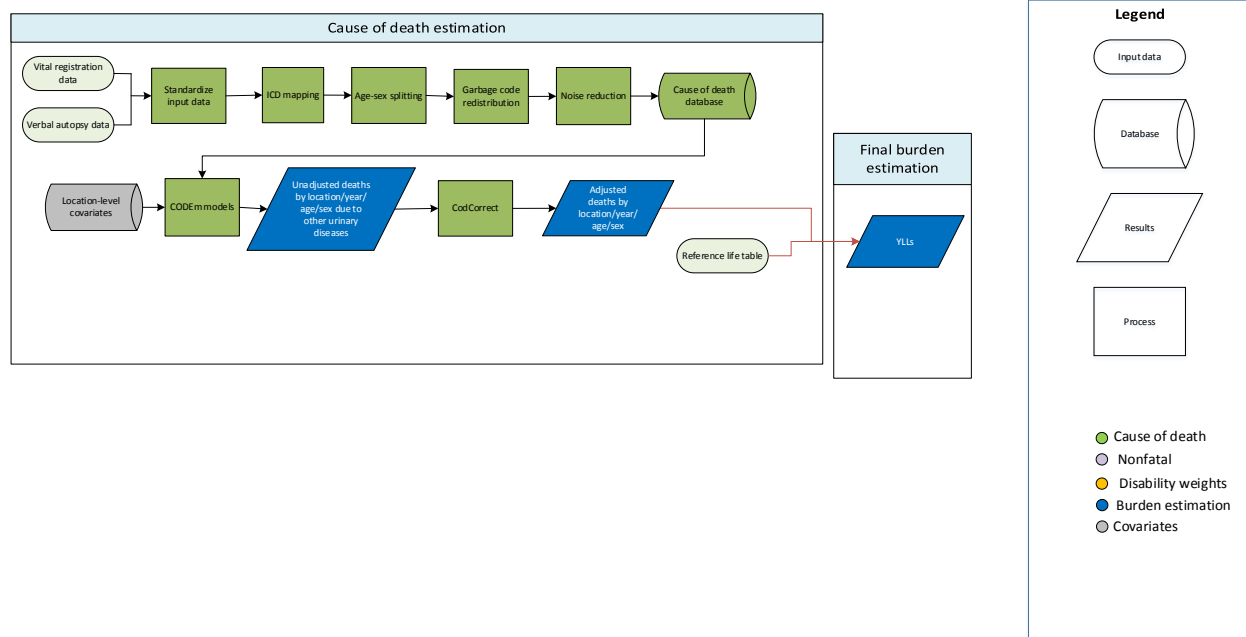

### Input data

Data informing other urinary diseases include vital registration and verbal autopsy data. Mortality secondary to other urinary diseases is uncommon, thus no literature review was conducted for this cause to identify registry, survey, or literature data. Outliers were identified by systematic examination of data points for all location-years. Data points were determined to be outliers if the data point was extremely low or high out of proportion for the region/year.

### Modeling strategy

The estimation strategy used for other urinary diseases is largely similar to methods used in GBD 2013. Vital registration data were standardized, and mapped according to the GBD COD ICD mapping method. These data were then age-sex split, and appropriate redistribution of data was performed using garbage coding. After applying noise reduction, these data were then uploaded to the COD database. Age-restrictions for death estimations secondary to urinary diseases and male infertility include 0 days for lower bounds, 80+ for upper bound. Iterations of models were assessed at the location/year/age-group/sex level to determine whether data points merited exclusion via outliering. The estimates are limited by a paucity of data for regions such as Eastern and Central sub-Saharan Africa.

## Gynecological conditions

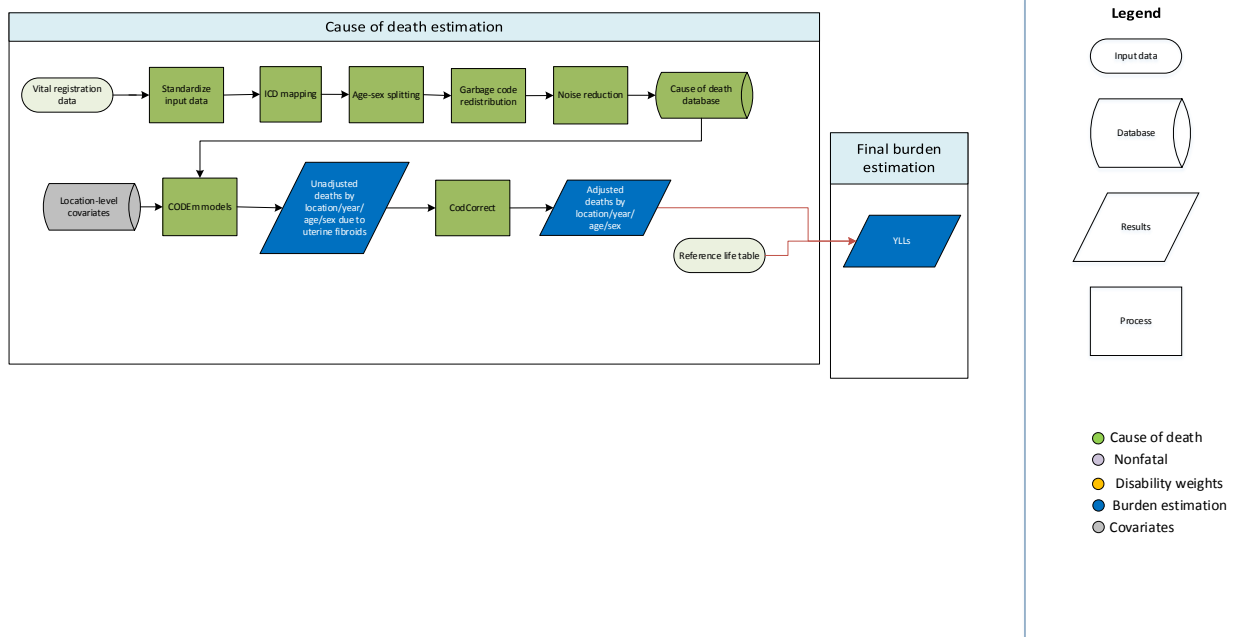

### Input data

Vital registration data were used to estimate deaths for each of the five fatal gynecological conditions. We only modeled deaths among women. Data points were selected as outliers if they were implausibly high, low, or significantly conflicted with established age or temporal patterns.

### Modeling strategy

For GBD 2013, after we estimated mortality due to all gynecological diseases using CODEm, we used a proportional allocation method to attribute deaths to uterine fibroids, endometriosis, genital prolapse, polycystic ovarian syndrome, and other gynecological diseases. We assumed no deaths from premenstrual syndrome and primary infertility. When possible, we used the region-age-specific proportion of mortality derived from the raw data for each sub-cause of death and applied these proportions to the overall gynecological death estimates, then to super-region-age-specific estimates, and last to global estimates. For GBD 2015, we again assume no deaths from premenstrual syndrome and primary infertility. However, CODEm was used to model each of the remaining subcategories individually. This was possible due to new data that were added this cycle, and this modeling strategy improved model fit over the old approach.

This year, we have reassigned deaths due to leiomyomas and other benign uterine tumors to our uterine fibroids cause. This has contributed to an overall increase in the estimated number of deaths from uterine fibroids and subsequently contributed to an increase in deaths from all gynecological conditions.

## Endocrine, metabolic, blood, and immune disorders

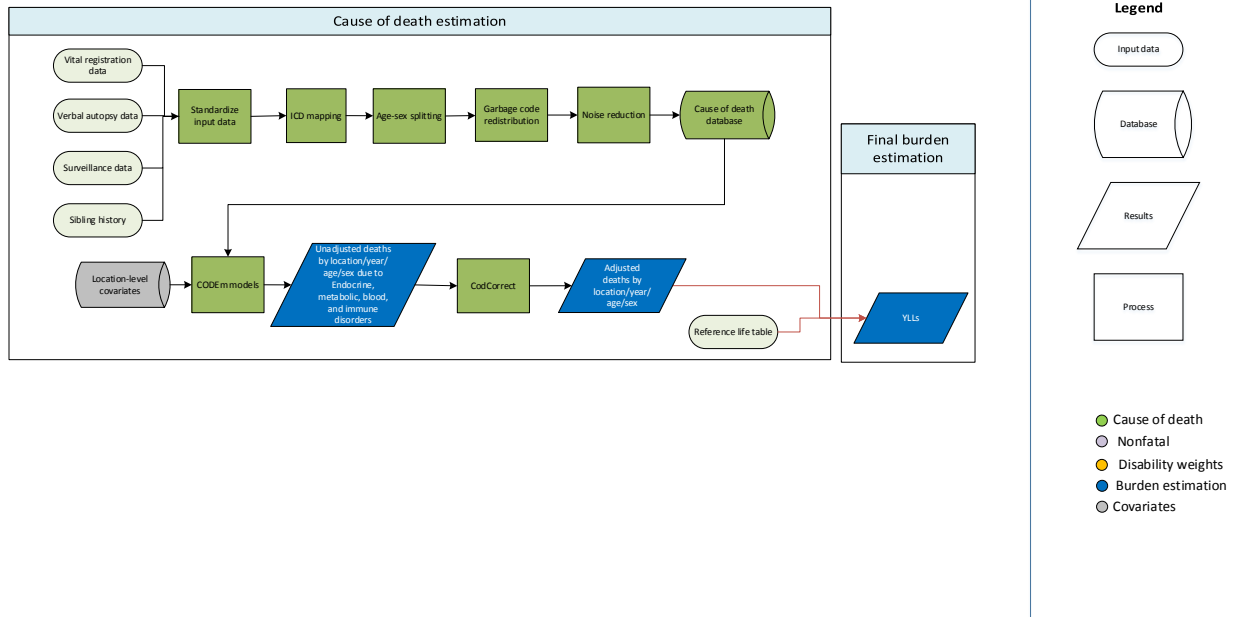

### Input data

Vital registration, verbal autopsy, sibling history, and surveillance data were used. Data were outliered if they largely conflicted with the majority of data from other studies conducted either in the same or different countries (with similar sociodemographic characteristics) in the same region.

### Modeling strategy

A general CODEm modeling strategy was used. There were no substantive changes from GBD 2013 in terms of modeling strategy.

## Musculoskeletal disorders

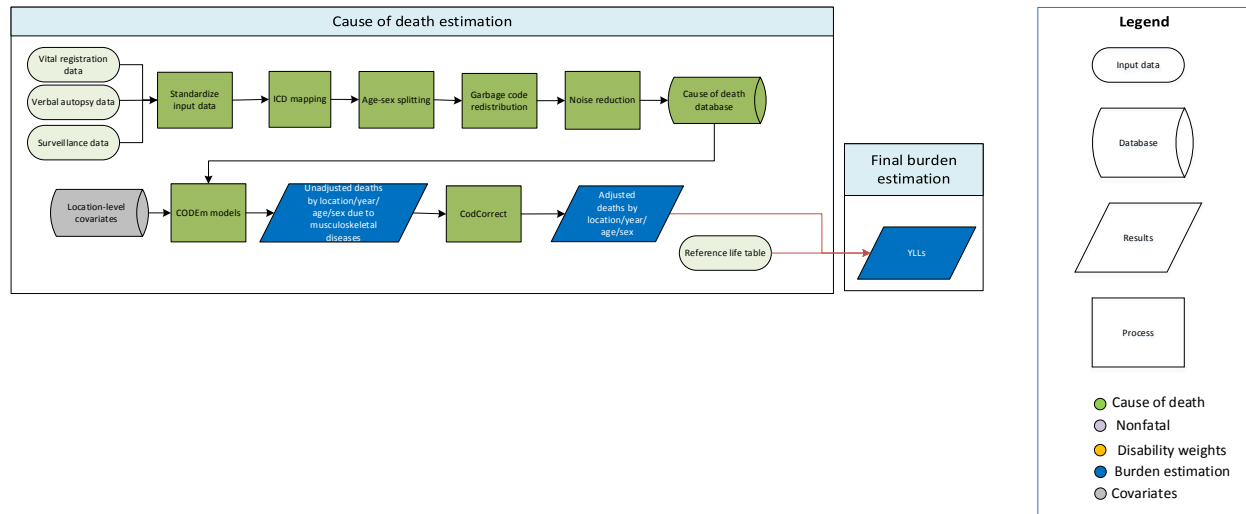

### Input data

Data used to estimate mortality from musculoskeletal disorders (MSK) included vital registration, verbal autopsy (VA), and China disease surveillance point data from the cause of death (COD) database. Our outlier criteria excluded data points that were implausibly high or low relative to global or regional patterns, substantially conflicted with established age or temporal patterns, or significantly conflicted with other data sources based from the same locations or locations with similar characteristics (i.e., Socio-Demographic Index).

Based on these criteria, in GBD 2015 we excluded VA data from India and Bangladesh since they did not sufficiently capture MSK deaths and overall, estimates for the subcontinent were disproportionately high. In GBD 2013, a large amount of vital registration data for the oldest age groups in Mexican states were outliered. For GBD 2015, we retained all these data, which led to notably high estimates for some states, particularly in Oaxaca for males.

### Modeling strategy

The standard CODEm modeling approach was applied to estimate deaths due to musculoskeletal disorders. We applied the same covariates used in GBD 2013, excluding the four covariates for proportions of population at 0-15, 15-30, 30-45, and 45 and over latitudes, which had no observable benefit to the model. We also added the Socio-Demographic Index (SDI) variable created for GBD 2015. Otherwise, there were no changes from the GBD 2013 modeling strategy.

The variation in mortality levels may be influenced by variations in coding practices with regard to the osteoporosis codes. For GBD 2016 we plan to examine the contribution of osteoporosis to all musculoskeletal mortality more closely.

## Rheumatoid arthritis

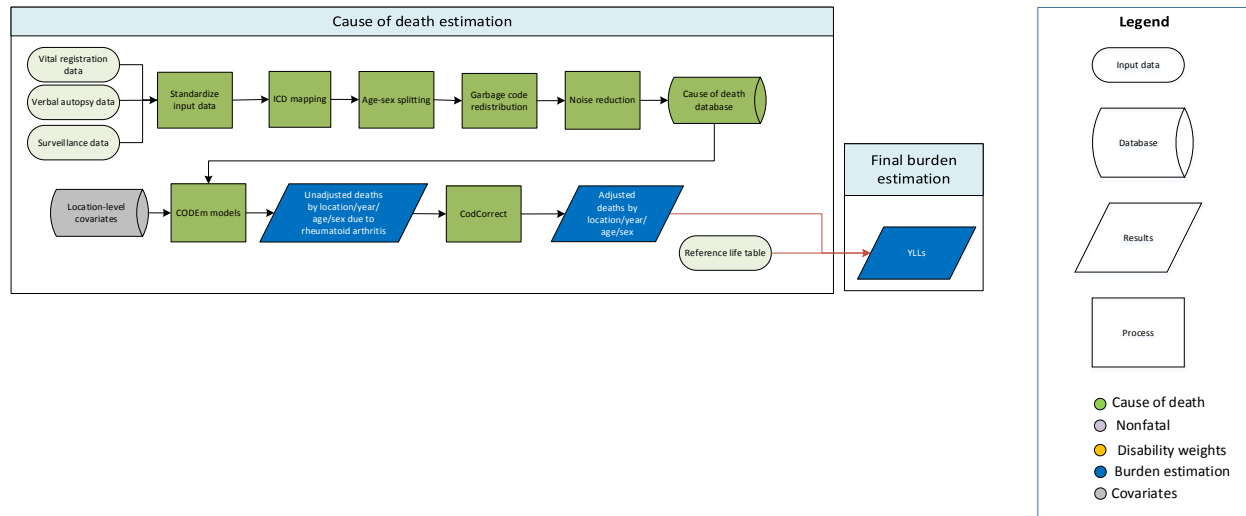

### Input data

Data used to estimate rheumatoid arthritis mortality included vital registration, verbal autopsy, and China disease surveillance point data from the cause of death (COD) database. Our outlier criteria excluded data points that were implausibly high or low relative to global or regional patterns, substantially conflicted with established age or temporal patterns, or significantly conflicted with other data sources based from the same locations or locations with similar characteristics (i.e., Socio-Demographic Index).

In GBD 2015, we re-included many vital registration data points for the oldest age groups in Mexican states that were dropped in GBD 2013. We also outliered all data points for men in Tibet, as these led to disproportionately high estimates.

### Modeling strategy

The standard CODEm modeling approach was applied to estimate deaths due to rheumatoid arthritis. We applied the same covariates used in GBD 2013 but excluded the four covariates for proportions of population at 0-15, 15-30, 30-45, and 45 and over latitudes, which had no observable benefit to the model. We added the Socio-Demographic Index (SDI) variable created for GBD 2015. Otherwise, there were no changes from the GBD 2013 modeling strategy.

## Other musculoskeletal disorders

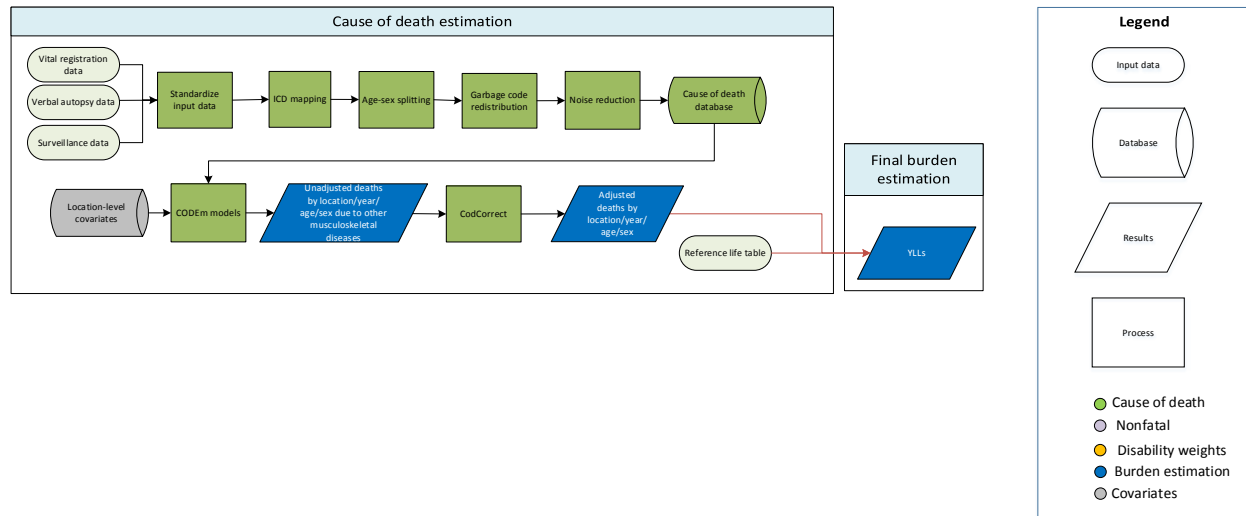

### Input data

Data used to estimate mortality of other musculoskeletal disorders (MSK) included vital registration, verbal autopsy (VA), and China disease surveillance point data from the cause of death (COD) database. Our outlier criteria excluded data points that were implausibly high or low relative to global or regional patterns, substantially conflicted with established age or temporal patterns, or significantly conflicted with other data sources based from the same locations or locations with similar characteristics (i.e., Socio-Demographic Index). Based on these criteria, we excluded VA studies from Eastern and Western sub-Saharan Africa as VA was not sufficient in capturing other MSK deaths and estimates for the regions were disproportionately high.

### Modeling strategy

The standard CODEm modeling approach was applied to estimate deaths due to other musculoskeletal disorders. We applied the same covariates used in GBD 2013, excluding the four covariates for proportions of population at 0-15, 15-30, 30-45, and 45 and over latitudes, which had no observable benefit to the model. We added the Socio-Demographic Index (SDI) variable created for GBD 2015. Otherwise, there were no changes from the GBD 2013 modeling strategy.



## Congenital anomalies

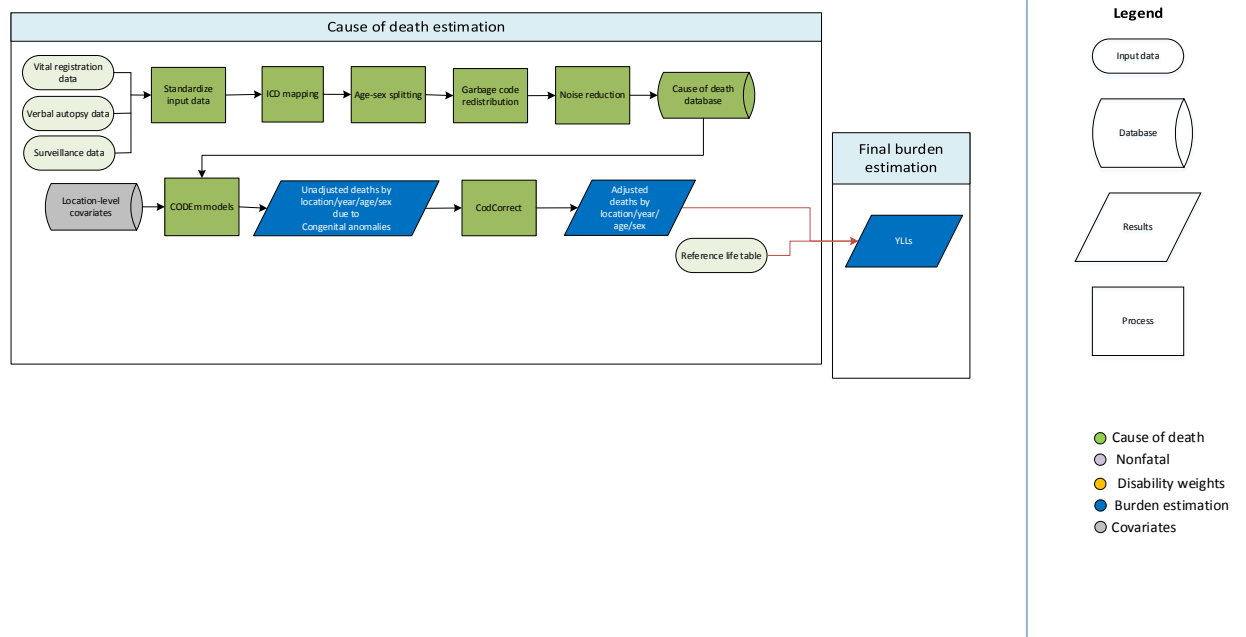

### Input data

Input data for estimating mortality due to congenital anomalies was centrally extracted, processed, and stored in causes of death (COD) database. Vital registration (VR) was the dominant data type, followed by verbal autopsy (VA) and surveillance. Those COD data sources that specified the sub-cause of birth defect were included in estimation of both the parent congenital anomalies model as well as in sub-type-specific models. Data exclusions were limited. We outliered all VA data in those over 5 years old as the age patterns were unreliable and led to poor model performance in the under-5 age groups. We also excluded some data sources from the parent model where only a subset of sub-causes were specified (e.g., congenital heart disease, neural tube defects, and other congenital anomalies) and the sum of the sub-causes clearly represented systematic underreporting of one of the sub-causes. Systematic underreporting was suspected when sex- and age-specific rates were more than an order of magnitude lower than neighboring or comparable locations. These data sources were still included for those sub-cause specific models where reporting was reliable.

### Modeling strategy

All congenital anomalies were estimated using cause-of-death ensemble modeling (CODEm). This was unchanged from GBD 2013. Specific causes included neural tube defects, congenital heart disease, Down syndrome, other chromosomal disorders, and other congenital anomalies. We assumed no mortality from either Klinefelter syndrome or Turner syndrome.

## Skin and subcutaneous diseases

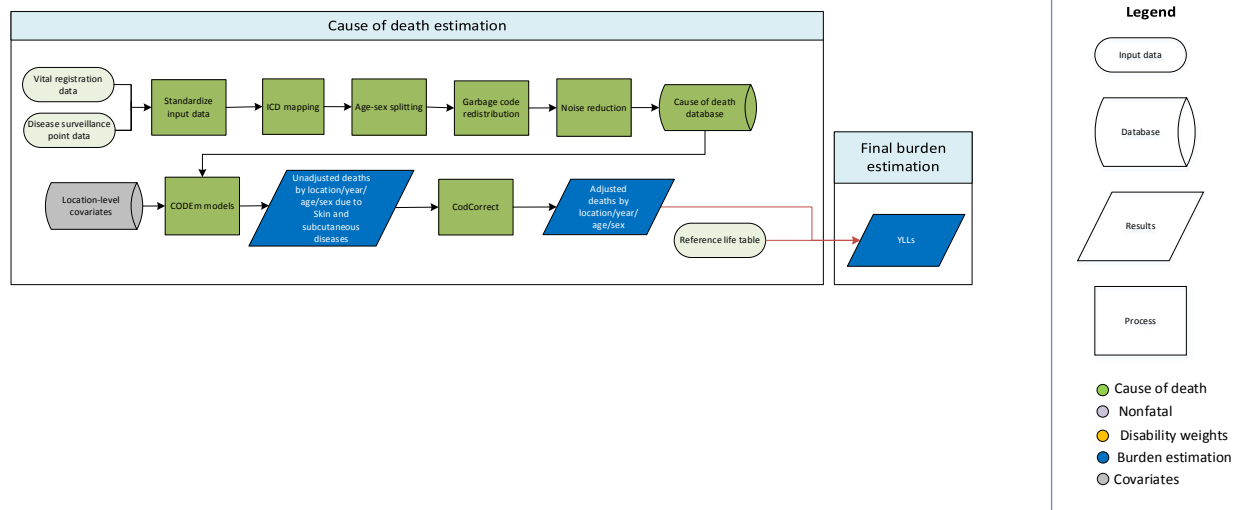

### Input data

Data used to estimate mortality of skin and subcutaneous diseases consisted of vital registration and China disease surveillance point (DSP) sources from the cause of death (COD) database. Outlier criteria excluded data points that were implausibly high or low relative to global or regional patterns and data from countries with small populations.

### Modeling strategy

The standard CODEm modeling approach was used to estimate deaths due to skin and subcutaneous diseases. CODEm parameters were centrally defined. We evaluated over 30 models at different stages of the modeling process as updates were made to the data and the modeling coefficients. COD models were evaluated by comparing age-standardized death rates per 100,000 people to GBD 2013 best model for 1990, and 2013 individually for males and females. We also compared age-standardized annualized rate of change for death rate per 100,000 people to GBD 2013.

We applied the same covariates used in GBD 2013, excluding the four covariates for proportions of population at latitudes 0-15, 15-30, 30-45, and 45 and over. We also added the standardized exposure variable scalar (SEV-Scalar) for unsafe sanitation and Socio-Demographic Index (SDI) variable created for GBD 2015. Otherwise, there were no changes from the GBD 2013 modeling strategy.

## Cellulitis

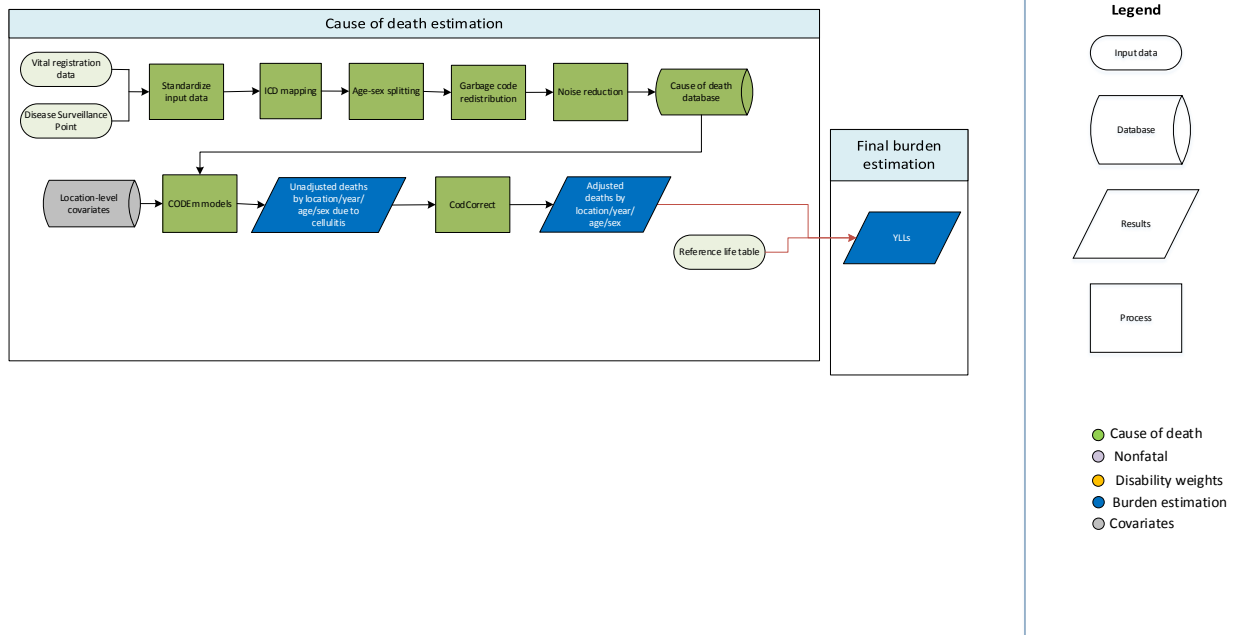

### Input data

Data used to estimate cellulitis mortality consisted of vital registration and Chinese disease surveillance point (DSP) data from the cause of death (COD) database. Outlier criteria excluded data points that were implausibly high or low relative to global or regional patterns and data from countries with small populations.

### Modeling strategy

The standard CODEm modeling approach was used to estimate deaths due to cellulitis. CODEm parameters were centrally defined. We evaluated over 30 models at different stages of the modeling process as updates were made to the data and the modeling coefficients. COD models were evaluated by comparing age-standardized death rates per 100,000 people to GBD 2013 best model for 1990, and 2013 individually for males and females. We also compared age-standardized annualized rate of change for death rate per 100,000 people to GBD 2013.

We applied the same covariates used in GBD 2013, excluding the four covariates for proportions of population at latitudes 0-15, 15-30, 30-45, and 45 and over. We also added the standardized exposure variable scalar (SEV-Scalar) for unsafe sanitation and Socio-Demographic Index (SDI) variable created for GBD 2015. Otherwise, there were no changes from the GBD 2013 modeling strategy.

# Pyoderma

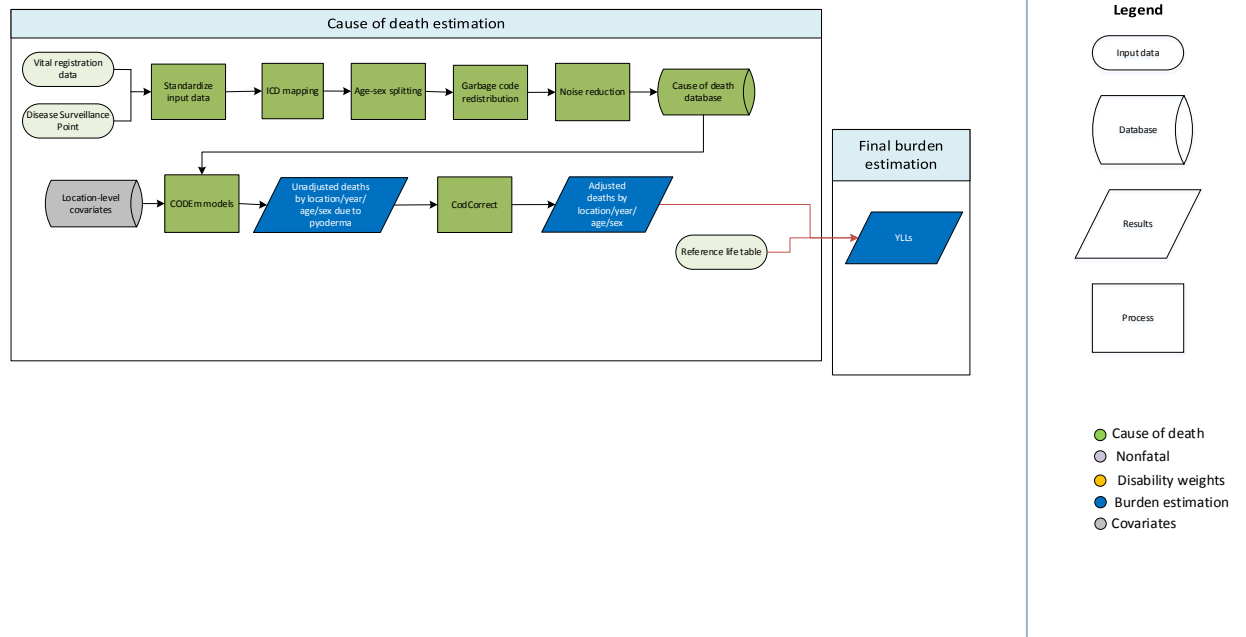

## Input data

Data used to estimate pyoderma mortality included centrally prepped vital registration and China disease surveillance point sources from the cause of death (COD) database. Outlier criteria excluded data points that were implausibly high or low relative to global or regional patterns and data from countries with small populations.

## Modeling strategy

The standard CODEm modeling approach was used to estimate deaths due to pyoderma. CODEm parameters were centrally defined. We evaluated over 30 models at different stages of the modeling process as updates were made to the data and the modeling coefficients. COD models were evaluated by comparing age-standardized death rates per 100,000 people to GBD 2013 best model for 1990, and 2013 individually for males and females. We also compared age-standardized annualized rate of change for death rate per 100,000 people to GBD 2013.

We applied the same covariates used in GBD 2013, excluding the four covariates for proportions of population at latitudes 0-15, 15-30, 30-45, and 45 and over. We also added the standardized exposure variable scalar (SEV-Scalar) for unsafe sanitation and Socio-Demographic Index (SDI) variable created for GBD 2015. Otherwise, there were no changes from the GBD 2013 modeling strategy.

# Decubitus ulcer

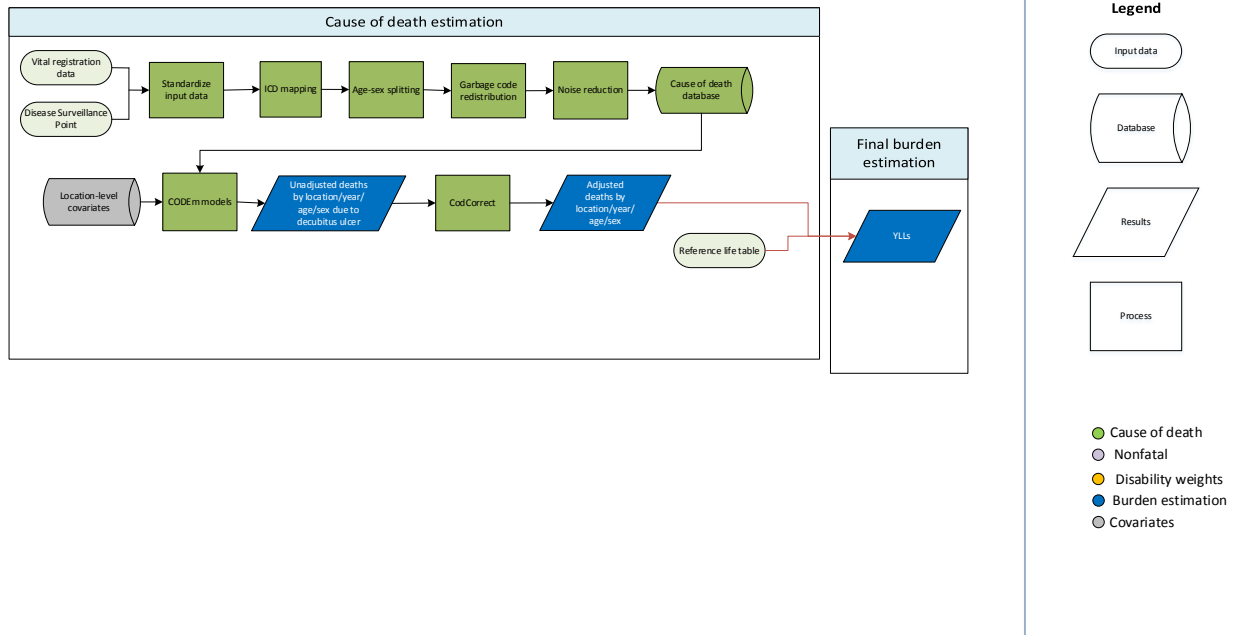

## Input data

Data used to estimate mortality of decubitus ulcer consisted of vital registration and China disease surveillance point (DSP) sources from the cause of death (COD) database. Outlier criteria excluded data points that were implausibly high or low relative to global or regional patterns and data from countries with small populations.

## Modeling strategy

The standard CODEm modeling approach was used to estimate deaths due to decubitus ulcer. CODEm parameters were centrally defined. We evaluated more than 30 models at different stages of the modeling process as updates were made to the data and the modeling coefficients. COD models were evaluated by comparing age-standardized death rates per 100,000 people to GBD 2013 best model for 1990, and 2013, individually for males and females. We also compared age-standardized annualized rate of change for death rate per 100,000 people to GBD 2013.

We applied the same covariates used in GBD 2013, excluding the four covariates for proportions of population at latitudes 0-15, 15-30, 30-45, and 45 and over. We also added the standardized exposure variable scalar (SEV-Scalar) for unsafe sanitation and Socio-Demographic Index (SDI) variable created for GBD 2015. Otherwise, there were no changes from the GBD 2013 modeling strategy.

## Other skin and subcutaneous diseases

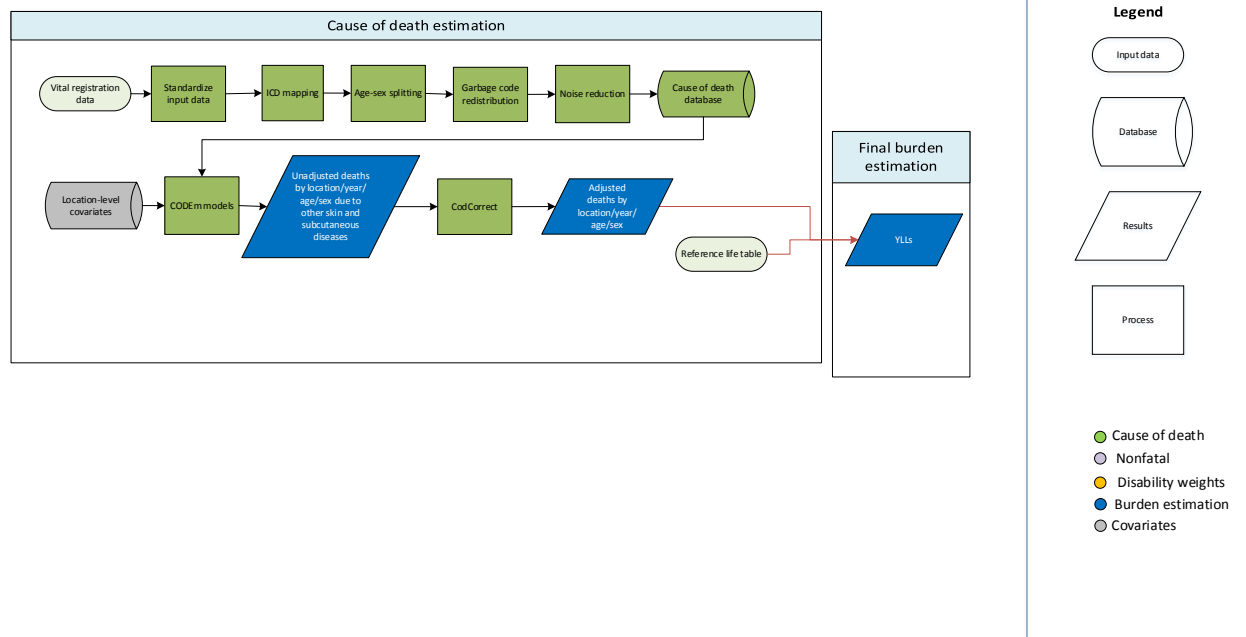

### Input data

Data used to estimate mortality of other skin and subcutaneous diseases consisted of vital registration sources from the cause of death (COD) database. Outlier criteria excluded data points that were implausibly high or low relative to global or regional patterns and data from countries with small populations.

### Modeling strategy

The standard CODEm modeling approach was used to estimate deaths due to other skin and subcutaneous diseases. CODEm parameters were centrally defined. We evaluated more than 30 models at different stages of the modeling process as updates were made to the data and the modeling coefficients. COD models were evaluated by comparing age-standardized death rates per 100,000 people to GBD 2013 best model for 1990, and 2013 individually for males and females. We also compared age-standardized annualized rate of change for death rate per 100,000 people to GBD 2013.

We applied the same covariates used in GBD 2013, excluding the four covariates for proportions of population at latitudes 0-15, 15-30, 30-45, and 45 and over. We also added the standardized exposure variable scalar (SEV-Scalar) for unsafe sanitation and Socio-Demographic Index (SDI) variable created for GBD 2015. Otherwise, there were no changes from the GBD 2013 modeling strategy.

## Sudden Infant Death Syndrome (SIDS)

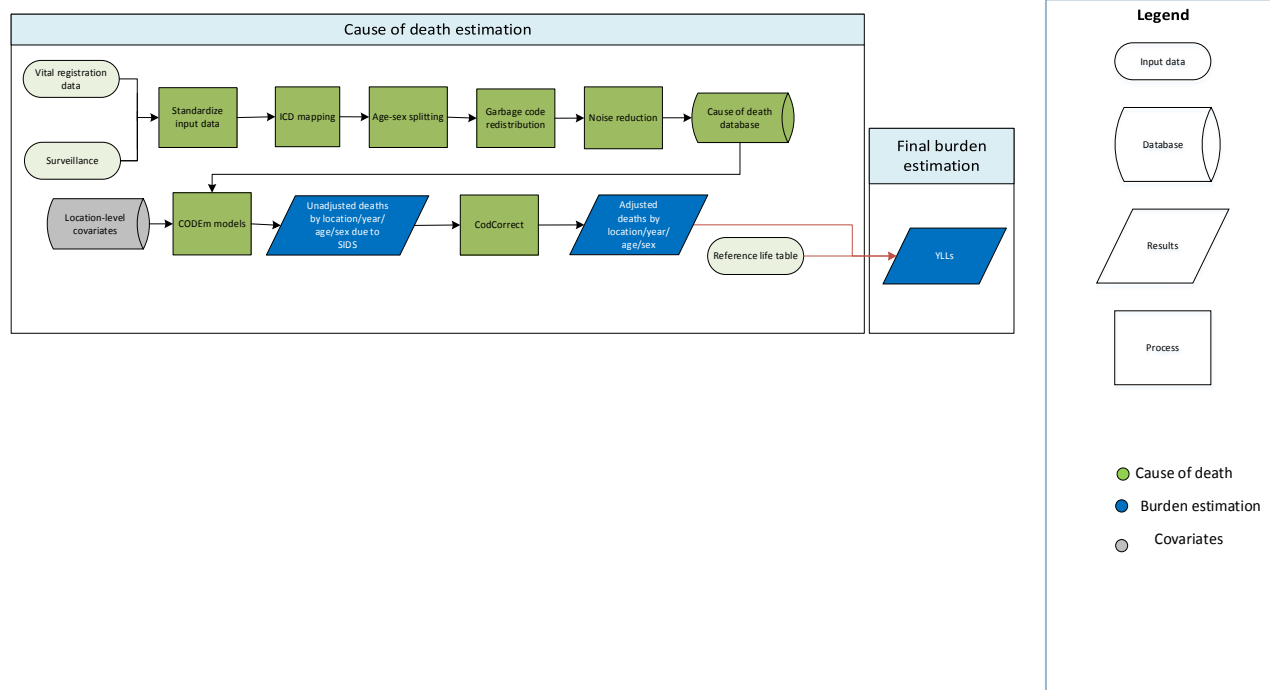

### Input data

Vital registration data were used to estimate deaths due to sudden infant death syndrome (SIDS). Data points were selected as outliers if they met the following criteria: (1) implausibly high values relative to country time trends or global or regional patterns, based on the assumption that there are not “outbreaks” of SIDS, or (2) substantially conflicting with established age or temporal patterns.

### Modeling strategy

The standard CODEm modeling approach was applied to estimate deaths due to SIDS. We ran CODEm models for ages 7-27 and 28-364 days because we believe that deaths assigned to SIDS in other age groups are mis-assigned and therefore treated as garbage codes. Surveillance data and verbal autopsy data were not used as inputs to this model because these sources do not use data collection methods that can accurately diagnose deaths due to SIDS.

Notable differences between the GBD 2013 strategy and this iteration include updates across the board to smoking-related covariates, total fertility rate, and Socio-Demographic Index covariates. The addition of American Samoa to the Oceania region is also of note, as well as the shift to including more ICD detail codes in the input data for some countries that previously reported only aggregated codes.

## Injuries

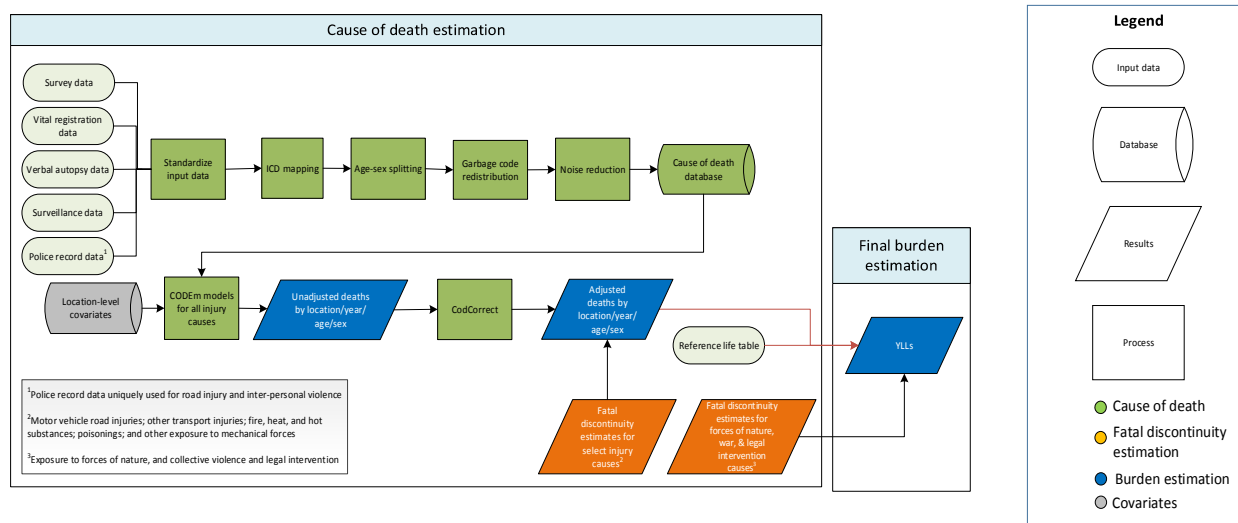

### Input data

In GBD 2015, we estimated injury mortality from vital registration, verbal autopsy, mortality surveillance, censuses, surveys, and police record data. Police and crime reports were data sources uniquely used for the estimation of deaths from road traffic injury and interpersonal violence. The police data were collected from published studies, national agencies, and institutional surveys such as the United Nations Crime Trends Survey and the WHO Global Status Report on Road Safety Survey. For countries with vital registration data we did not use police records, except if the recorded number of road injury and interpersonal violence deaths from police records exceeded that in the vital registration.

Infrequently, data points were marked as outliers. Outlier criteria excluded data points that (1) were implausibly high or low relative to global or regional patterns, (2) substantially conflicted with established age or temporal patterns, or (3) significantly conflicted with other data sources conducted from the same locations or locations with similar characteristics (i.e., Socio-Demographic Index).

### Modeling strategy

#### Overview

In GBD 2015, the standard CODEm modeling approach was applied to estimate deaths due to all causes of injury, excluding “Exposure to forces of nature” and “Collective violence and legal intervention,” which fall under the aggregate cause “Forces of nature, war, and legal intervention.” Similar to GBD 2013, both of these causes were modeled solely outside of the CODEm process as mortality shock regressions (now referred to as fatal discontinuities estimation); this process is detailed further in the fatal discontinuities estimation in the appendix. New to GBD 2015, fatal discontinuity was estimated for five injury causes also modeled in CODEm. These causes included “Motor vehicle road injuries,” “Other transport injuries,” “Fire, heat, and hot substances,” “Poisonings,” and “Other exposure to mechanical



forces.” Final fatal discontinuity estimations for these causes were merged with CODEm results post-CodCorrect to produce final cause of death results.

Refer to the Table at the end of this section for a complete list of the cause-of-injury categories, modeling strategies, and covariate changes from GBD 2013.

#### GBD injury codes and categories

The International Classification of Diseases (ICD) was used to classify injuries because it is the standard diagnostic tool for epidemiology. In GBD, injury incidence and death are defined as ICD-9 codes E000-E999 and ICD-10 chapters V to Y. There is one exception: deaths and cases of alcohol poisoning and drug overdoses are classified under drug and alcohol use disorders. In GBD 2013, injury causes were organized into 26 mutually exclusive and collectively exhaustive external cause-of-injury categories. For GBD 2015, “Environmental exposure to heat and cold” was added to the list of cause-of-injury categories. These are deaths defined by ICD-10 codes W88-W94, W99, X30-32, and X39. In GBD 2013, these deaths were included in the cause-of-injury categories “Other unintentional injuries” and “Exposure to forces of nature, disaster.” For GBD 2015, this change resulted in a decrease of deaths attributed to “Other unintentional injuries.”

Another cause-of-injury category affected by a redistribution strategy change was “Unintentional poisoning.” Similar to GBD 2013, we redistributed deaths coded as unspecified poisoning among the homicide, self-harm, unintentional poisoning, and drug use disorder causes. However, in GBD 2015, we sought to refine our redistribution strategy to more accurately represent unspecified poisoning deaths. Upon close review of ICD-coded deaths for unspecified poisoning, we identified a specific age-pattern, in which the death rate spiked in ages 15–50 years. Noting this trend, we conducted further review of data and found that these deaths were likely due to drug use disorders. We then redistributed many unspecified poisoning deaths from unintentional poisoning to drug use disorders, and based on high-quality ICD-9 and ICD-10 data, re-assigned these deaths to the drug use disorder sub-causes. Therefore, our estimates for unintentional poisoning decreased notably from GBD 2013.

#### Preparation of data

The preparation of cause of death data includes age splitting, age-sex splitting, smoothing, and outlier detection. These steps are described in detail by Naghavi et al and Lozano et al.<sup>1,2</sup> The concept of “garbage codes” and redistribution of these codes was proposed in the GBD 1990.<sup>3</sup> Garbage codes are causes of death that should not be identified as specific underlying causes of death but have been entered as the underlying cause of death on death certificates. A classic example of these types of codes in injuries chapters are “Exposure to unspecified factor” (X59 in ICD-10 and E887 in ICD-9) and all undetermined intent codes (Y10-Y34 in ICD-10 and E980-E988 in ICD-9). Other examples of garbage codes in injuries are the coding of an injury death to intermediate codes like septicemia or peritonitis or as an ill-defined and unknown cause of mortality (R99). Approximately 2% of total deaths in countries with vital registration data are assigned to these three injury garbage code categories.

#### Splitting into sublevel causes

In countries with non-detail ICD code data, cause-of-injury categories were proportionally split into sublevel cause-of-injury categories. The sublevel cause-of-injury causes were created in the CodCorrect process. One of the countries with non-detail ICD code data is South Africa, and in GBD 2013 the

proportions of sublevel cause-of-injury were based on vital registration data. For GBD 2015 the proportions were based on the paper by Matzopoulos et al. 2015.<sup>4</sup>

#### Limitations and model assumptions

We added police data for road injuries and interpersonal violence to help predict level and age patterns in countries with sparse or absent cause of death data even though we know from countries with near-complete vital registration data that police records tend to underestimate the true level of deaths. However, we applied police data estimates in instances where reported deaths were higher than vital registration numbers.

For the cause-of-injury category “Unintentional suffocation” we suspect that varying practices in coding deaths to sudden infant death syndrome (which end up in “Unintentional suffocation”) can explain some of the differences we see and we plan to explore that further in the next iteration of GBD.

| <b>Table – Injury Cause List</b> |                                |                                          |                                                                                                                                                                                                                                                                                          |
|----------------------------------|--------------------------------|------------------------------------------|------------------------------------------------------------------------------------------------------------------------------------------------------------------------------------------------------------------------------------------------------------------------------------------|
| <b>ID</b>                        | <b>Cause</b>                   | <b>Modeling Strategy</b>                 | <b>Covariate changes from GBD 2013</b>                                                                                                                                                                                                                                                   |
| 1                                | Transport injuries             | CODEm                                    | +Socio-Demographic Index (SDI)                                                                                                                                                                                                                                                           |
| 1.1                              | Road injuries                  | CODEm                                    | +Standardized exposure variable (SEV) scalar for road injuries, SDS                                                                                                                                                                                                                      |
| 1.1.a                            | Pedestrian road injuries       | CODEm                                    | +SEV scalar for pedestrian road injuries, SDS                                                                                                                                                                                                                                            |
| 1.1.b                            | Cyclist road injuries          | CODEm                                    | +SEV scalar for cyclist road injuries, SDS                                                                                                                                                                                                                                               |
| 1.1.c                            | Motorcyclist road injuries     | CODEm                                    | +SEV scalar for motorcyclist injuries, SDS                                                                                                                                                                                                                                               |
| 1.1.d                            | Motor vehicle road injuries    | CODEm and fatal discontinuity estimation | +SEV scalar for motor vehicle road injuries, SDS                                                                                                                                                                                                                                         |
| 1.1.e                            | Other road injuries            | CODEm                                    | +SEV scalar for other road injuries, SDS                                                                                                                                                                                                                                                 |
| 1.2                              | Other transport injuries       | CODEm and fatal discontinuity estimation | +SEV scalar for other transport injuries, SDS                                                                                                                                                                                                                                            |
| 2                                | Unintentional injuries         | CODEm                                    | +Cumulative cigarettes (5 years), Diabetes fasting plasma glucose (mmol/L), Education (years per capita), Health system access, Mal-nutrition, Indoor air pollution, Population density (500–1000 ppl/sqkm, prop), Smoking prevalence<br><br>-Population over 65 and Population under 30 |
| 2.1                              | Falls                          | CODEm                                    | +SEV scalar for falls, SDS                                                                                                                                                                                                                                                               |
| 2.2                              | Drowning                       | CODEm                                    | +SEV scalar for drowning, SDS                                                                                                                                                                                                                                                            |
| 2.3                              | Fire, heat, and hot substances | CODEm and fatal discontinuity estimation | +SEV scalar for fire, heat, and hot substances, SDS                                                                                                                                                                                                                                      |
| 2.4                              | Poisonings                     | CODEm and fatal discontinuity estimation | +SEV scalar for poisonings, SDS                                                                                                                                                                                                                                                          |
| 2.5                              | Exposure to mechanical forces  | CODEm                                    | +SDI                                                                                                                                                                                                                                                                                     |
| 2.5.a                            | Unintentional firearm injuries | CODEm                                    | +SEV scalar for unintentional firearm injuries, SDS                                                                                                                                                                                                                                      |

|       |                                                 |                                                                        |                                                                                                                                                                                   |
|-------|-------------------------------------------------|------------------------------------------------------------------------|-----------------------------------------------------------------------------------------------------------------------------------------------------------------------------------|
| 2.5.b | Unintentional suffocation                       | CODEm                                                                  | +SEV scalar for unintentional suffocation, SDS                                                                                                                                    |
| 2.5.c | Other exposure to mechanical forces             | CODEm and fatal discontinuity estimation                               | +SEV scalar for other exposure to mechanical forces, SDS                                                                                                                          |
| 2.6   | Adverse effects of medical treatment            | CODEm                                                                  | SDI                                                                                                                                                                               |
| 2.7   | Animal contact                                  | CODEm                                                                  | +SEV scalar for animal contact, SDS                                                                                                                                               |
| 2.7.a | Venomous animal contact                         | CODEm                                                                  | +SEV scalar for venomous animal contact, SDS                                                                                                                                      |
| 2.7.b | Non-venomous animal contact                     | CODEm                                                                  | +SEV scalar for non-venomous animal contact, SDS                                                                                                                                  |
| 2.8   | Foreign body                                    | CODEm                                                                  | +SDI                                                                                                                                                                              |
| 2.8.a | Pulmonary aspiration and foreign body in airway | CODEm                                                                  | +SEV scalar for pulmonary aspiration and foreign body in airway, SDS                                                                                                              |
| 2.8.b | Foreign body in other body part                 | CODEm                                                                  | +SEV scalar for foreign body in other body part, SDS                                                                                                                              |
| 2.9   | Environmental exposure to heat and cold         | CODEm                                                                  | N/A                                                                                                                                                                               |
| 2.10  | Other unintentional injuries                    | CODEm                                                                  | +SEV scalar for other unintentional injuries, SDS                                                                                                                                 |
| 3     | Self-harm and interpersonal violence            | CODEm                                                                  | +Elevation over 1500 m and under 100m, population density under 150 ppl/sqkm, vehicles 2 wheels per capita, vehicles 4 wheels per capita<br>-Abortion legality, opium cultivation |
| 3.1   | Self-harm                                       | CODEm                                                                  | +SEV scalar for self-harm, SDI, major depressive disorder prevalence                                                                                                              |
| 3.2   | Interpersonal violence                          | CODEm                                                                  | +SEV scalar for interpersonal violence, SDS                                                                                                                                       |
| 3.2.a | Assault by firearm                              | CODEm                                                                  | +SEV scalar for assault by firearm, SDS                                                                                                                                           |
| 3.2.b | Assault by sharp object                         | CODEm                                                                  | +SEV scalar for assault by sharp object, SDS                                                                                                                                      |
| 3.2.c | Assault by other means                          | CODEm                                                                  | +SEV scalar for assault by other means, SDS                                                                                                                                       |
| 4     | Forces of nature, war, and legal intervention   |                                                                        |                                                                                                                                                                                   |
| 4.1   | Exposure to forces of nature                    | Fatal discontinuity estimation for disaster (appended post-CodCorrect) | N/A                                                                                                                                                                               |
| 4.2   | Collective violence and legal intervention      | Fatal discontinuity estimation for war (appended post-CodCorrect)      | N/A                                                                                                                                                                               |

## References

- 1 Lozano R, Naghavi M, Foreman K, *et al.* Global and regional mortality from 235 causes of death for 20 age groups in 1990 and 2010: a systematic analysis for the Global Burden of Disease Study 2010. *The Lancet* 2012; **380**: 2095–128.
- 2 Global, regional, and national age–sex specific all-cause and cause-specific mortality for 240 causes of death, 1990–2013: a systematic analysis for the Global Burden of Disease Study 2013. *The Lancet* 2015; **385**: 117–71.
- 3 Murray CJL, Lopez AD, Harvard School of Public Health, World Health Organization, World Bank. The global burden of disease: a comprehensive assessment of mortality and disability from diseases, injuries, and risk factors in 1990 and projected to 2020. Cambridge, MA: Published by the Harvard School of Public Health on behalf of the World Health Organization and the World Bank : Distributed by Harvard University Press, 1996.
- 4 Matzopoulos R, Prinsloo M, Wyk VP, Gwebushe N, Mathews S, *et al.* Injury-related mortality in South Africa: a retrospective descriptive study of postmortem investigations. *Bull World Health Organ* 2015; **93**: 303–13.

## 2. Causes modeled outside of CODEm

### 2.1 Overview

A number of causes required alternative modeling strategies to those used for CODEm, as they were not compatible with CODEm estimation infrastructure and processes. Such unsuitability included having very low death counts; inadequate availability of cause-specific death records; and marked biases or variability for cause of death certification over time which could not be fully accounted for with current garbage code redistribution algorithms. The inclusion of these causes in CODEm often renders its out-of-sample predictive validity testing, a key advantage of using CODEm for cause of death estimation, unstable, or CODEm simply fails to generate plausible mortality rates in the absence of enough VR or VA data. Due to increased data availability and redistribution algorithm refinements, we were able to incorporate several new causes, which were modeled separately for GBD 2013, into CODEm for this iteration of the GBD study; with each annual update of GBD, we aim to add more causes within the CODEm estimation space. For GBD 2015, we used alternative modeling approaches for these causes, including negative binomial models, natural history models, sub-cause proportion models, and prevalence-based models.

## 2.2 Negative binomial models

For 10 rare causes of death, there were too few observed deaths in the cause of death database to produce stable estimates. For these causes, we ran negative binomial regression models with either a constant or constant multiplied by the mean assumption for the dispersion parameter, using reverse step-wise model building. We selected between the two model dispersion assumptions on the basis of best fit to the data, using the same method as GBD 2013. For GBD 2015 we also tested zero-inflated Poisson models for these rare causes of death, but rejected them after finding that they did not substantially affect the mean predictions but produced unrealistically large UIs. Descriptions of the modeling process for each of these causes are provided below.

## Other Intestinal Infectious Diseases

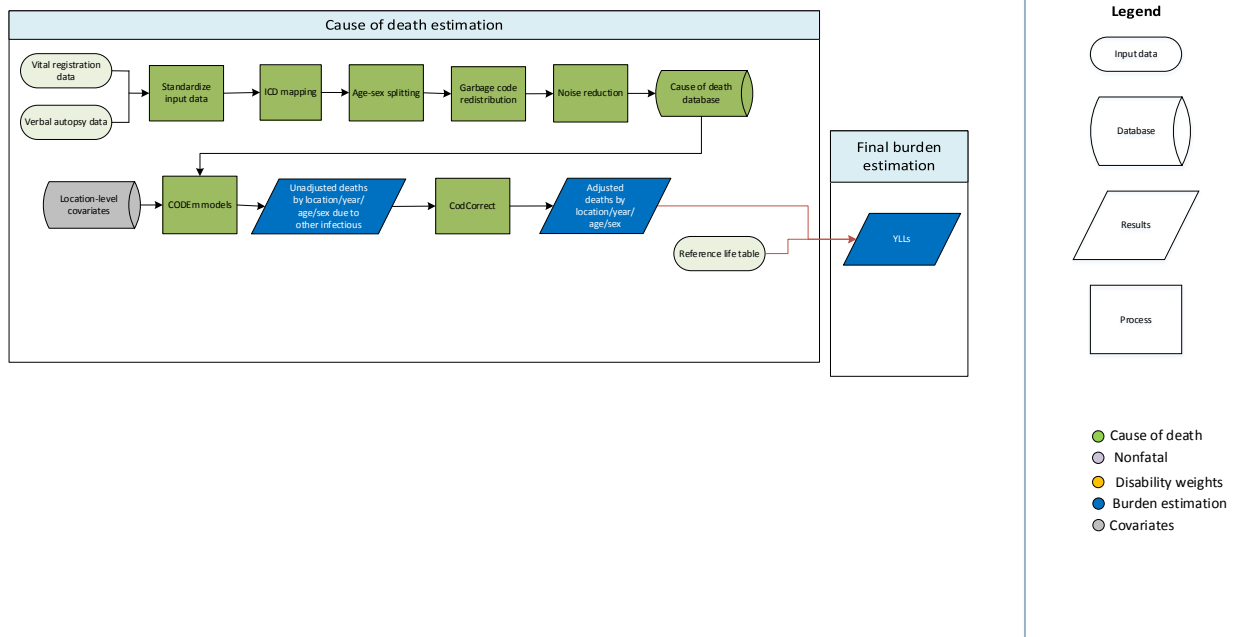

### Input data

We modeled other intestinal infectious disease mortality using all available data in the cause of death database. Data points were outliered if they reported an improbable number of deaths or if their inclusion in the model yielded distorted trends. In some cases multiple data sources for the same location differed dramatically both in their quality and reported rabies mortality (e.g., a verbal autopsy and vital registration source). In these cases the lower-quality data source was outliered.

### Modeling strategy

We modeled other intestinal infectious disease mortality using a two-model hybrid approach: 1) a global CODEm model of all locations, using all data in the CoD database; and 2) a CODEm model restricted to data-rich countries.

Since GBD 2013 we have switched from a single global model to the hybrid global/data-rich model approach. We have otherwise made no substantive changes in the modeling strategy for other intestinal infectious diseases from GBD 2013.

## Upper respiratory infections

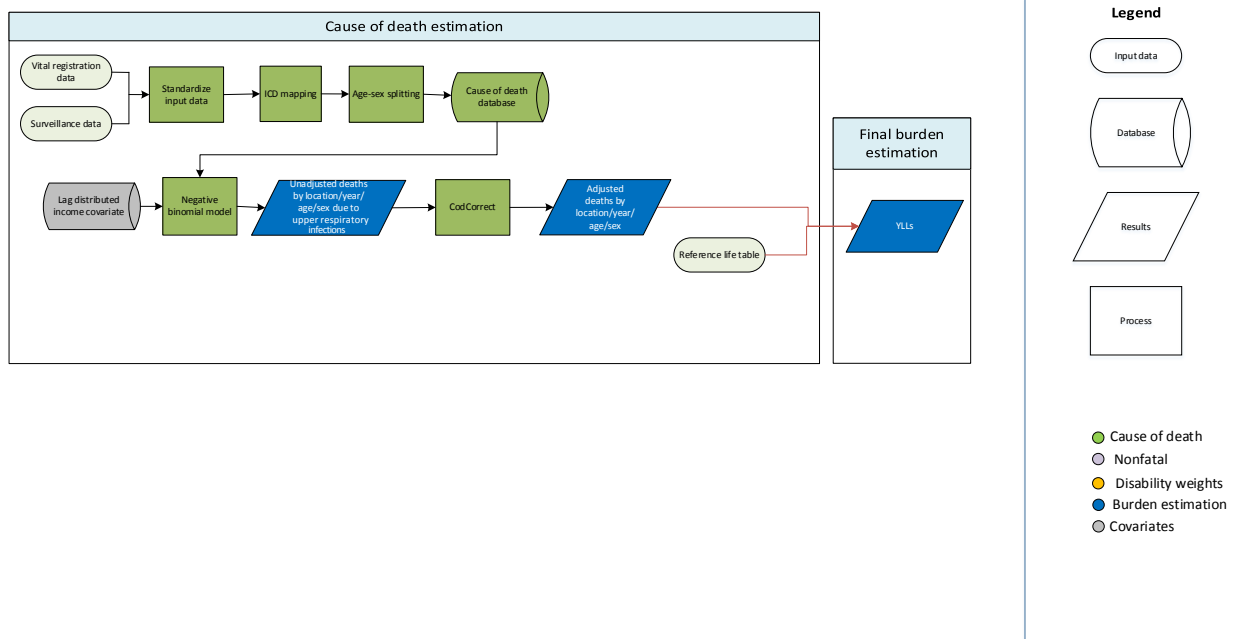

### Input data

Vital registration and surveillance data from the cause of death database were used. Data with very high cause fractions (those greater than the 97th percentile values) were excluded in the regression.

### Modeling strategy

Due to a small number of deaths, mortality from upper respiratory infections was modeled using a negative binomial regression, which is more appropriate than a Poisson count model as it accounts for greater variance (over-dispersion) in the data. By utilizing the exposure option in Stata, we model cause fractions with a negative binomial model. We tested both rate- and cause fraction-based models but selected a cause fraction model due to better model performance. Using the input data mentioned above, we modeled mortality from upper respiratory infections using the lag distributed income covariate and age dummy variables and the exposure set to the total number of deaths in the study. Uncertainty was estimated by taking 1,000 iterations of the predictions based on the variance covariance matrix and a random sample from a gamma distribution. The fit of the model was evaluated using diagnostic plots of predicted versus observed values.



# Diphtheria

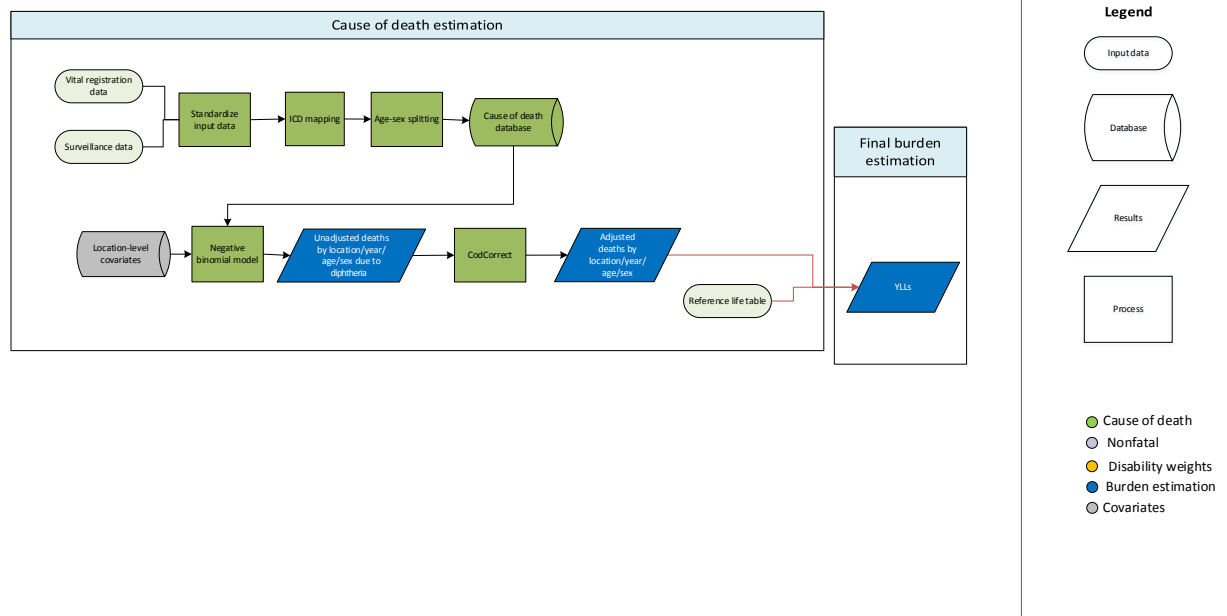

## Input data

Vital registration and surveillance data from the cause of death database were used. Data with very high cause fractions (those greater than the 99th percentile values) were excluded in the regression.

## Modeling strategy

Due to the small number of deaths, diphtheria mortality was modeled using a negative binomial regression, which is more appropriate than a Poisson count model as it accounts for greater variance (over-dispersion) in the data. By utilizing the exposure option in Stata, we model cause fractions with a negative binomial model. We tested both rate- and cause fraction-based models but selected a cause fraction model due to better model performance. Using the input data mentioned above, we modeled mortality due to diphtheria with the DPT3 coverage covariate and age dummy variables and the exposure set to the total number of deaths in the study. Uncertainty was estimated by taking 1,000 iterations of the predictions based on the variance covariance matrix and a random sample from a gamma distribution. The fit of the model was evaluated using diagnostic plots of predicted versus observed values.

# Varicella

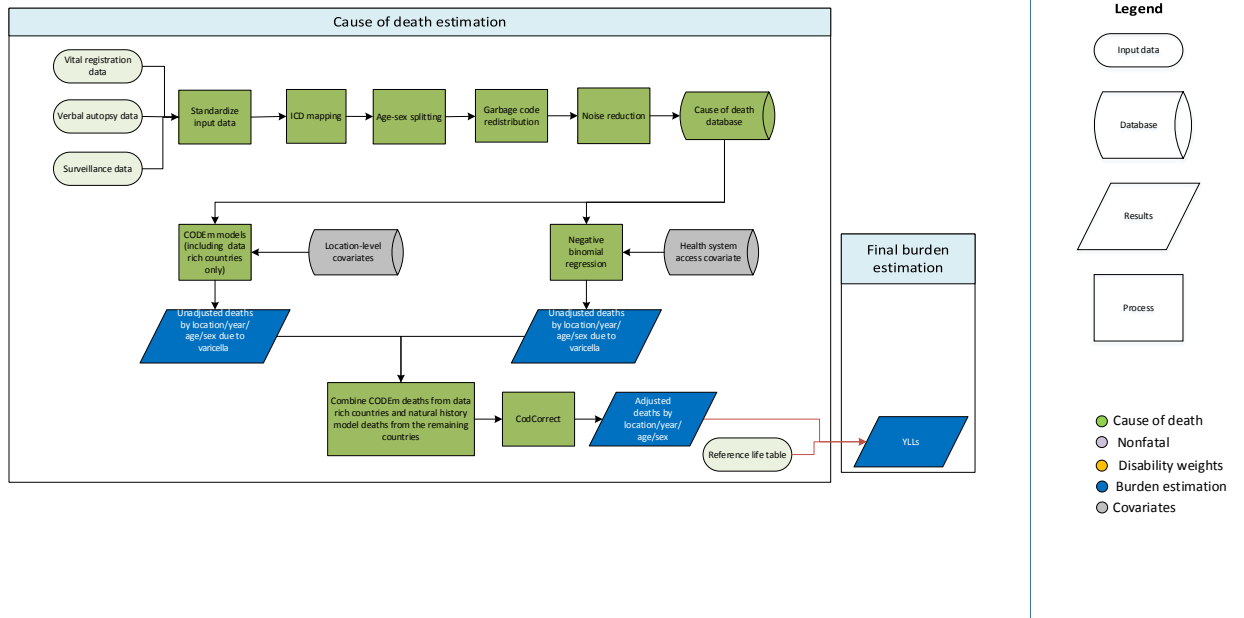

## Input data

Vital registration, verbal autopsy and surveillance data from the cause of death database were used. Data with very high cause fractions (those greater than the 99th percentile values) were excluded in the negative binomial regression.

## Modeling strategy

Mortality was modeled two ways. For data-rich countries (i.e., countries with vital registration more than 95% complete for more than 25 years), we used CODEm. For the remaining countries, since CODEm did not predict well in data-sparse areas, we used a negative binomial regression to model varicella mortality. By utilizing the exposure option in Stata, we modeled cause fractions with a negative binomial model. We tested both rate- and cause fraction-based models but ultimately selected a rate model due to better model performance. Using the input data mentioned above, we modeled mortality due to varicella using the health system access covariate and age dummy variables with the exposure set to the location-year-age-sex-specific population. Uncertainty was estimated by taking 1,000 iterations of the predictions based on the variance covariance matrix and a random sample from a gamma distribution. The fit of the model was evaluated using diagnostic plots of predicted versus observed values.

In GBD 2013, we used a negative binomial regression to model varicella mortality for all countries. For GBD 2015, we switched to using CODEm for data-rich countries because it fit the data better in those countries.

# Schistosomiasis

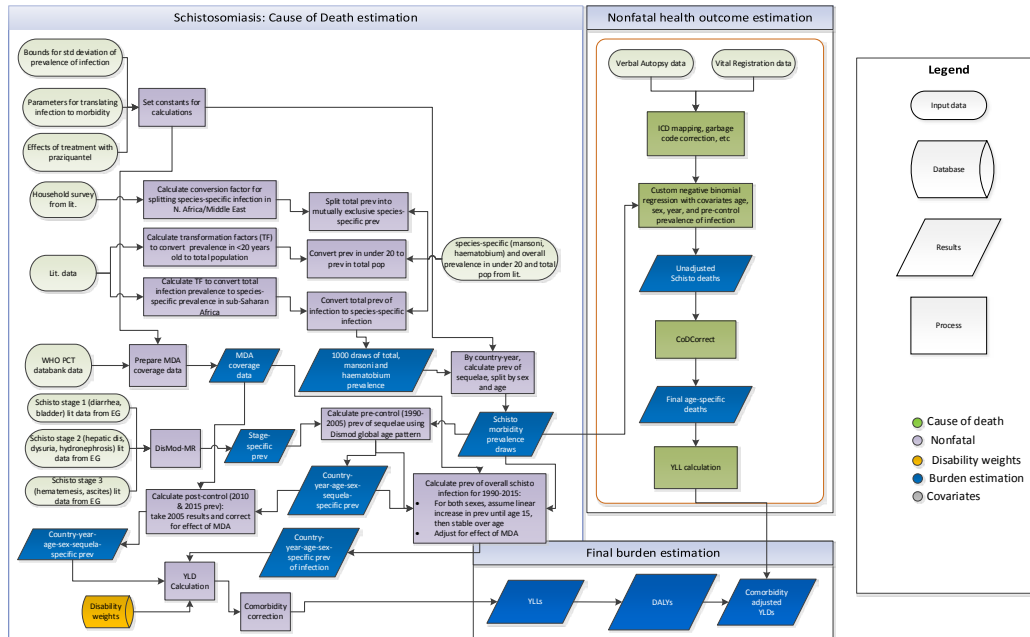

## Input data

To estimate mortality due to schistosomiasis, data on deaths and prevalence of infection were used. The prevalence data were prepared in GBD 2010, and further information on this is available in the nonfatal write-up for this cause. Country-year-age-sex-specific verbal autopsy and vital registration data were used in the mortality model. We did not conduct a systematic literature review for schistosomiasis for GBD 2015.

## Modeling strategy

To estimate deaths due to schistosomiasis, a negative binomial regression model of country-year-age-sex-specific deaths on natural log-transformed prevalence of total schistosomiasis infection was used. The negative binomial regression was selected due to its suitability for modeling count data. In addition, there are relatively low number of deaths attributable to schistosomiasis. Time trends in the data for Egypt and China were very non-linear. Therefore, in the model, time trends for Egypt and China were allowed to differ from the global time trend by adding fractional polynomials for these two countries. A multivariate normal distribution using the mean and variance-covariance matrix from the model was used to generate 1,000 draws of deaths due to schistosomiasis.

Models were evaluated by assessing the AIC and plotting the predicted deaths against time, age, and sex. In addition, the Cause of Death Visualization tool was used to evaluate time trends across locations, age, and sex. A map of the global distribution of schistosomiasis across age-groups was also used to assess the changes in death rates over time. The final model was selected based on how well the estimated numbers fit the input data and how plausible the predicted distribution of disease was over time and with age.

In addition to the additional data from CoD, we added new information on the main covariate, infection prevalence, used in the model. Details of this are included in the nonfatal write-up for this cause; briefly, data from the Brazil Ministry of Health were used to split the national Brazil prevalence into 19 out of the 27 Brazil subnational locations for which we estimate burden of disease. In addition, for locations for which we added subnational estimation, the national prevalence was applied to subnational prevalence due to lack of information to split the prevalence accordingly. These included Kenya, Saudi Arabia, and South Africa. Finally, in GBD 2013, the negative binomial model applied a different time trend for Brazil and the Philippines. This time trend was not applied in GBD 2015 due to poor model performance with its inclusion.

## Cysticercosis

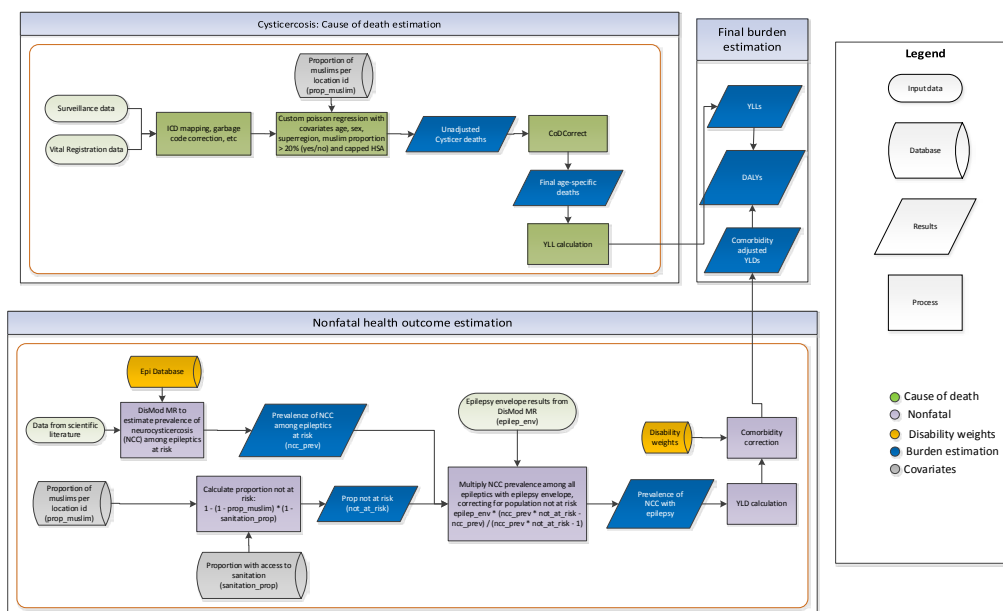

### Input data

The model for mortality due to cysticercosis relied on vital registration and surveillance data (from endemic countries). In addition, we used data from the Pew Research Center on percentage of population that is Muslim by country. The primary covariates adjusted for in the model were pigs per capita and proportion of Muslim (binary, 20% vs  $\leq 20\%$ ). Other covariates adjusted for in the model were age, sex, GBD super-regions, and capped health system access (HSA).

### Modeling strategy

Globally, deaths due to cysticercosis are relatively low. Therefore, a Poisson model was used to model cysticercosis deaths due to its suitability for count data. One thousand draws of deaths estimates were generated using a multivariate normal distribution using the mean and variance-covariance matrix from the Poisson regression. There were no data on cysticercosis deaths from South Asia. Therefore, in the predictions of deaths we applied the super-region coefficient for (Southeast Asia, East Asia, and Oceania) to South Asia.

We applied the same modeling strategy as used in GBD 2013, with the addition of estimates for new subnational locations. Since the Pew Research Center only has data on proportion of Muslims by country, we applied the national proportions to subnational locations. We understand that this does not account for sometimes large expected difference in proportions of Muslims within a country, but were limited by data availability.

## Cystic Echinococcosis (CE)

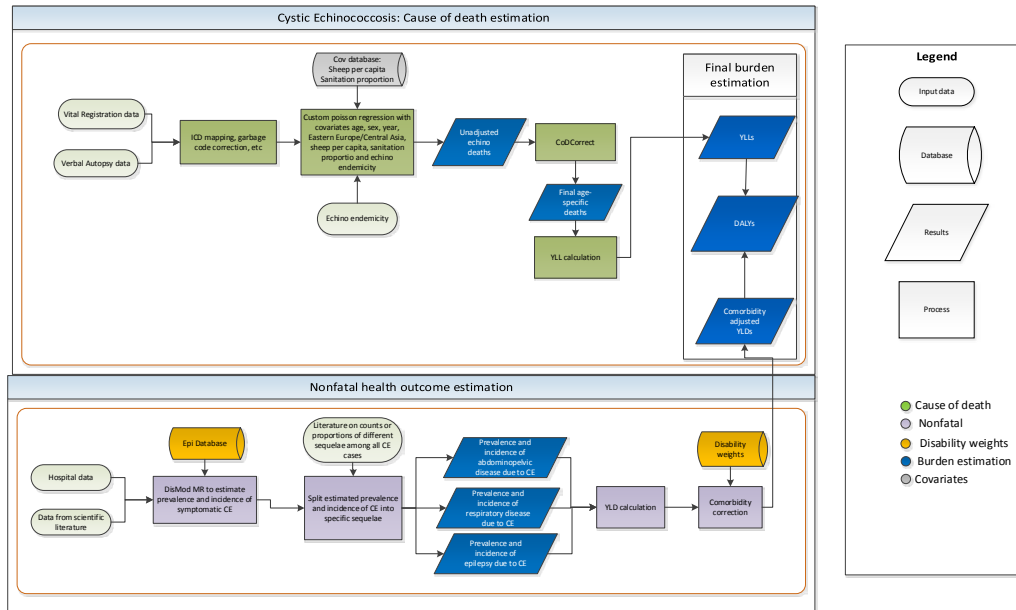

### Input data

There are limited data sources on deaths due to cystic echinococcosis (CE) and we did not use alveolar due to *E. multilocularis* or cystic echinococcosis due to *E. granulosus*. To model mortality due to CE, we used vital registration data. In addition, we incorporated data on echinococcosis endemicity provided by one of our echinococcosis collaborators. Sheep per capita was used as a covariate because sheep are the main intermediate host for the *Echinococcus granulosus* tapeworm, which leads to CE in humans when its eggs are ingested. Other covariates include proportion of population with access to sanitation, echinococcosis endemicity, and a region indicator for Eastern Europe and Central Asia. The echinococcosis endemicity covariate had four categories: 0=no cases/no data, 1=sporadic/mostly imported, 2=endemic/limited data, 3=highly endemic.

### Modeling strategy

The cause of death ensemble model (CODEm) was not employed for modeling deaths from CE due to the paucity of data on deaths from CE. We therefore used a Poisson regression of deaths on age, sex, year, and geography.

Using a multivariate normal distribution with mean and variance-covariance matrix from the Poisson regression, we generated 1,000 draws of estimates for the countries endemic for CE. The final model was selected based on how well the estimated numbers fit the input data and how plausible the predicted distribution of disease was over time and with age.

# Ascariasis

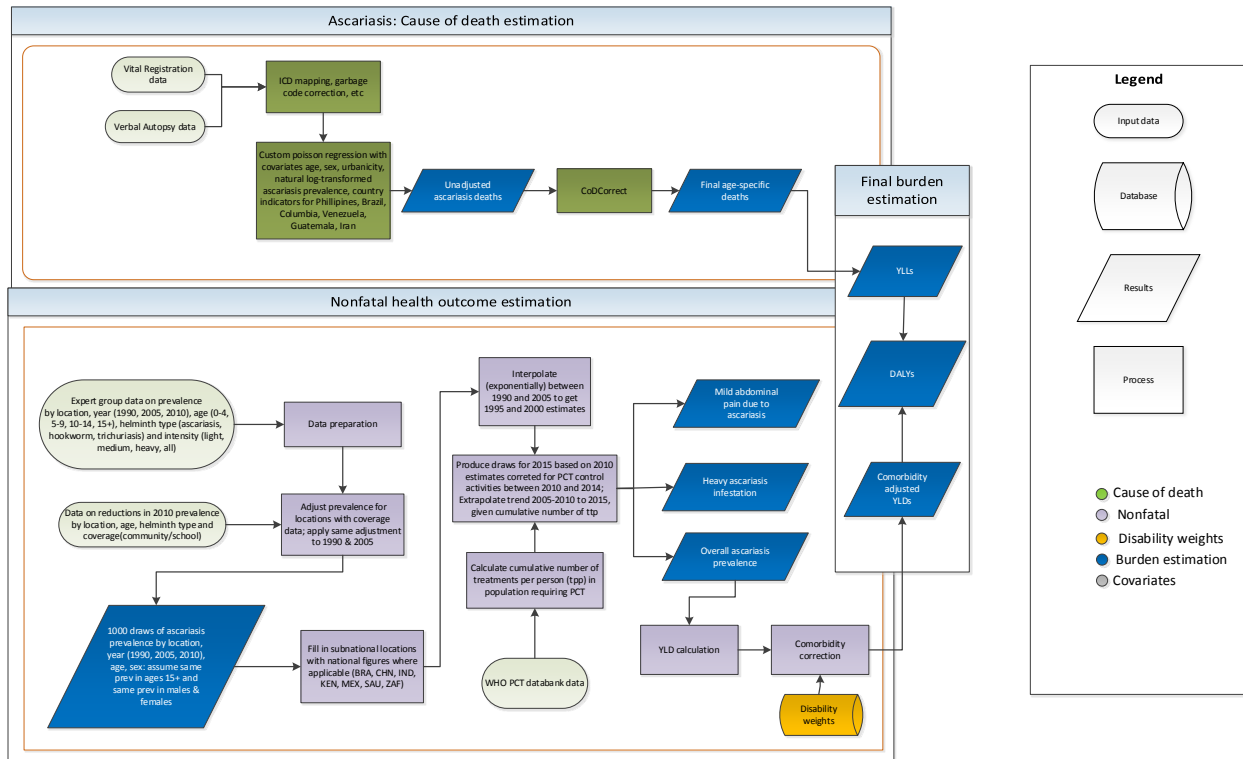

## Input data

To estimate mortality due to ascariasis, data on deaths and prevalence of infection were used. Country-year-age-sex-specific verbal autopsy and vital registration data were used in the mortality model. We did not conduct a systematic literature for ascariasis. The model was adjusted for age, sex, urbanicity (proportion of land with population density > 1000 / km<sup>2</sup>), and country indicators for Philippines, Brazil, Columbia, Venezuela, Guatemala, and Iran. Other epidemiologically relevant covariates (sanitation and capped health system access) were also added in the model.

## Modeling strategy

To estimate deaths due to ascariasis, a negative binomial regression model of country-year-age-sex-specific deaths on natural log-transformed age-standardized prevalence of ascariasis was used. A multivariate normal distribution using the mean and variance-covariance matrix from the model was used to generate 1,000 draws of deaths due to ascariasis.

## Iodine deficiency

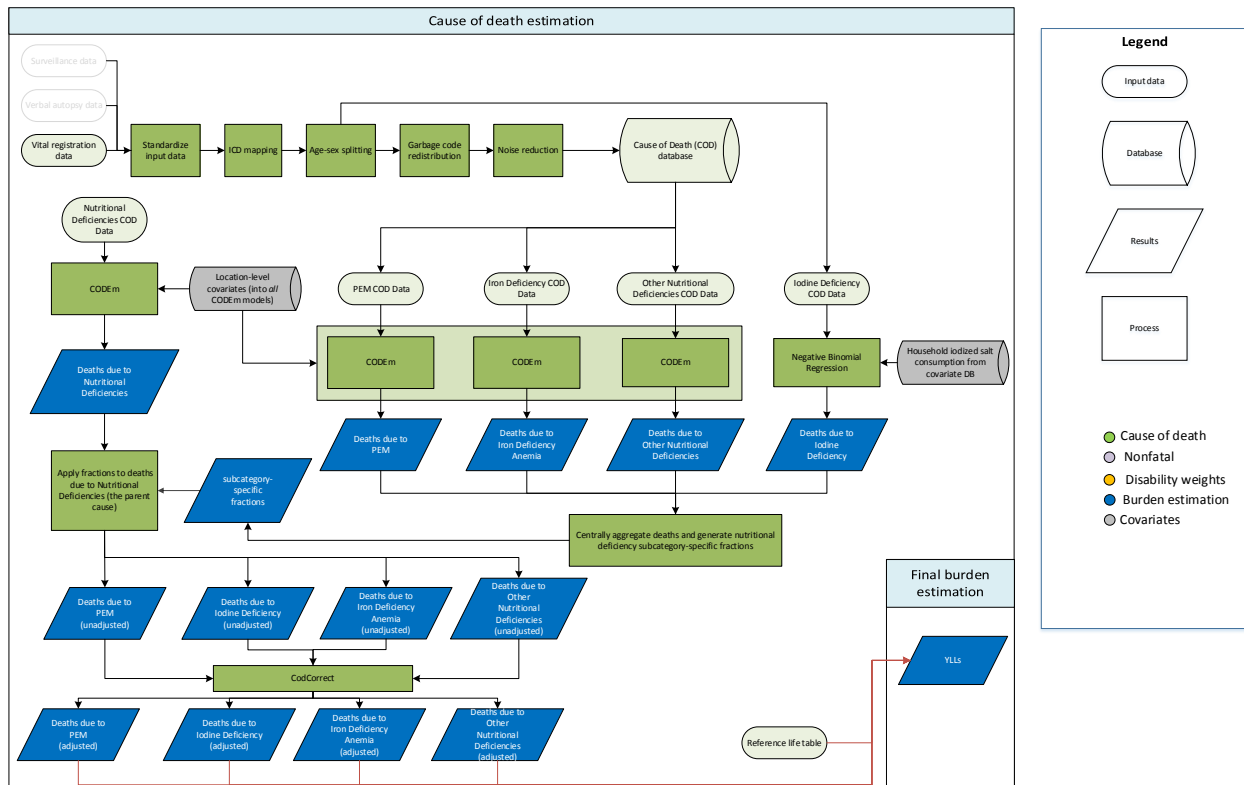

### Input data

Vital registration data were used.

### Modeling strategy

We estimated mortality due to iodine deficiency in two steps. CODEm was first used to generate mortality estimates for total nutritional deficiencies. The sub-categories of nutritional deficiencies, namely protein-energy malnutrition, iodine deficiency, iron-deficiency anemia, and other nutritional deficiencies, were modeled separately. CODEm was used to model all sub-categories except for iodine deficiency, which we modeled using a negative binomial regression model given the small number of deaths attributable to it. A negative binomial model is more appropriate than a Poisson count model as it accounts for greater variance (over-dispersion) in the data. By utilizing the exposure option in Stata, we model cause fractions with a negative binomial model. We tested both rate- and cause fraction-based models but selected a cause fraction model due to better model performance. We used vital registration data with proportion of household iodized salt consumption as a country-level covariate and dummy variables on age and sex to model mortality from iodine deficiency. Uncertainty was estimated by taking 1,000 iterations of the predictions based on the variance covariance matrix and a random sample from a gamma distribution. Estimates from the four nutritional sub-categories were then aggregated centrally at the 1,000 draw level to generate cause fractions for each sub-category. These



cause fractions were then applied centrally to the total nutritional deficiencies CODEm estimates to generate final sub-category mortality estimates.

### 2.3 DisMod-MR 2.1

Until GBD 2010, non-fatal estimates were based on a single data source on prevalence, incidence, remission, or a mortality risk selected by the researcher as most relevant to a particular geography and time. For GBD 2010, we set a more ambitious goal: to evaluate all available information on a disease that passes a minimum quality standard. That required a different analytical tool that would be able to pool disparate information presented in varying age groupings and from data sources using different methods. The DisMod-MR 1.0 tool used in GBD 2010 evaluated and pooled all available data, adjusted data for systematic bias associated with methods that varied from the reference and produced estimates by world regions with uncertainty intervals. For GBD 2013, the improved DisMod-MR 2.0 had increased computational speed allowing computations that were consistent between all disease parameters at the country rather than region level. The hundred-fold increase in speed of DisMod-MR 2.0 was partly due to a more efficient re-write of the code in C++ but also by changing to a model specification using log rates rather than a negative binomial model used in DisMod-MR 1.0. In cross-validation tests, the log rates specification worked as well or better than the negative binomial specification.<sup>1</sup> For GBD 2015, the computational engine (DisMod-MR 2.1) remained substantively unchanged but we re-wrote the ‘wrapper’ code that organized the flow of data and settings at each level of the analytical cascade. The sequence of estimation occurred at five levels: global, super-region, region, country, and, where applicable, subnational geographical units (see flow diagram of DisMod-MR 2.1 cascade, below). The super-region priors were generated at the global level with mixed-effects, non-linear regression using all available data; the super-region fit, in turn, informed the region fit, and so on down the cascade. The wrapper gave analysts the choice to branch the cascade in terms of time and sex at different levels depending on data density. The default used in most models was to branch by sex after the global fit but to retain all years of data until the lowest level in the cascade. For GBD 2015, we generated fits for the years 1990, 1995, 2000, 2005, 2010, and 2015.

In updating the ‘wrapper,’ we consolidated the code base into a single language, Python, to make the code more transparent and efficient and to better deal with subnational estimation. The computational engine is limited to three levels of random effects; we differentiated estimates at the super-region, region, and country level. In GBD 2013, the subnational units of China, Mexico, and the UK were treated as ‘countries’ such that a random effect was estimated for every geography with contributing data. However, the lack of a hierarchy between country and subnational units meant that the fit to country data contributed as much to the estimation of a subnational unit as the fits for all other countries in the region. We found inconsistency between the country fit and the aggregation of subnational estimates when the country’s epidemiology varied from the average of the region. Adding an additional level of random effects required a prohibitively comprehensive rewrite of the underlying DisMod-MR engine. Instead, we added a fifth layer to the cascade, with subnational estimation informed by the country fit and country covariates, plus an adjustment based on the average of the residuals between the subnational unit’s available data and its prior. This mimicked the impact of a random effect on estimates between subnationals.

For GBD 2015 we improved how country covariates differentiate non-fatal estimates for diseases with sparse data. The coefficients for country covariates were re-estimated at each level of the cascade. For a

given geography, country coefficients were calculated using both data and prior information available for that geography. In the absence of data, the coefficient of its parent geography was used, in order to utilize the predictive power of our covariates in data sparse situations.

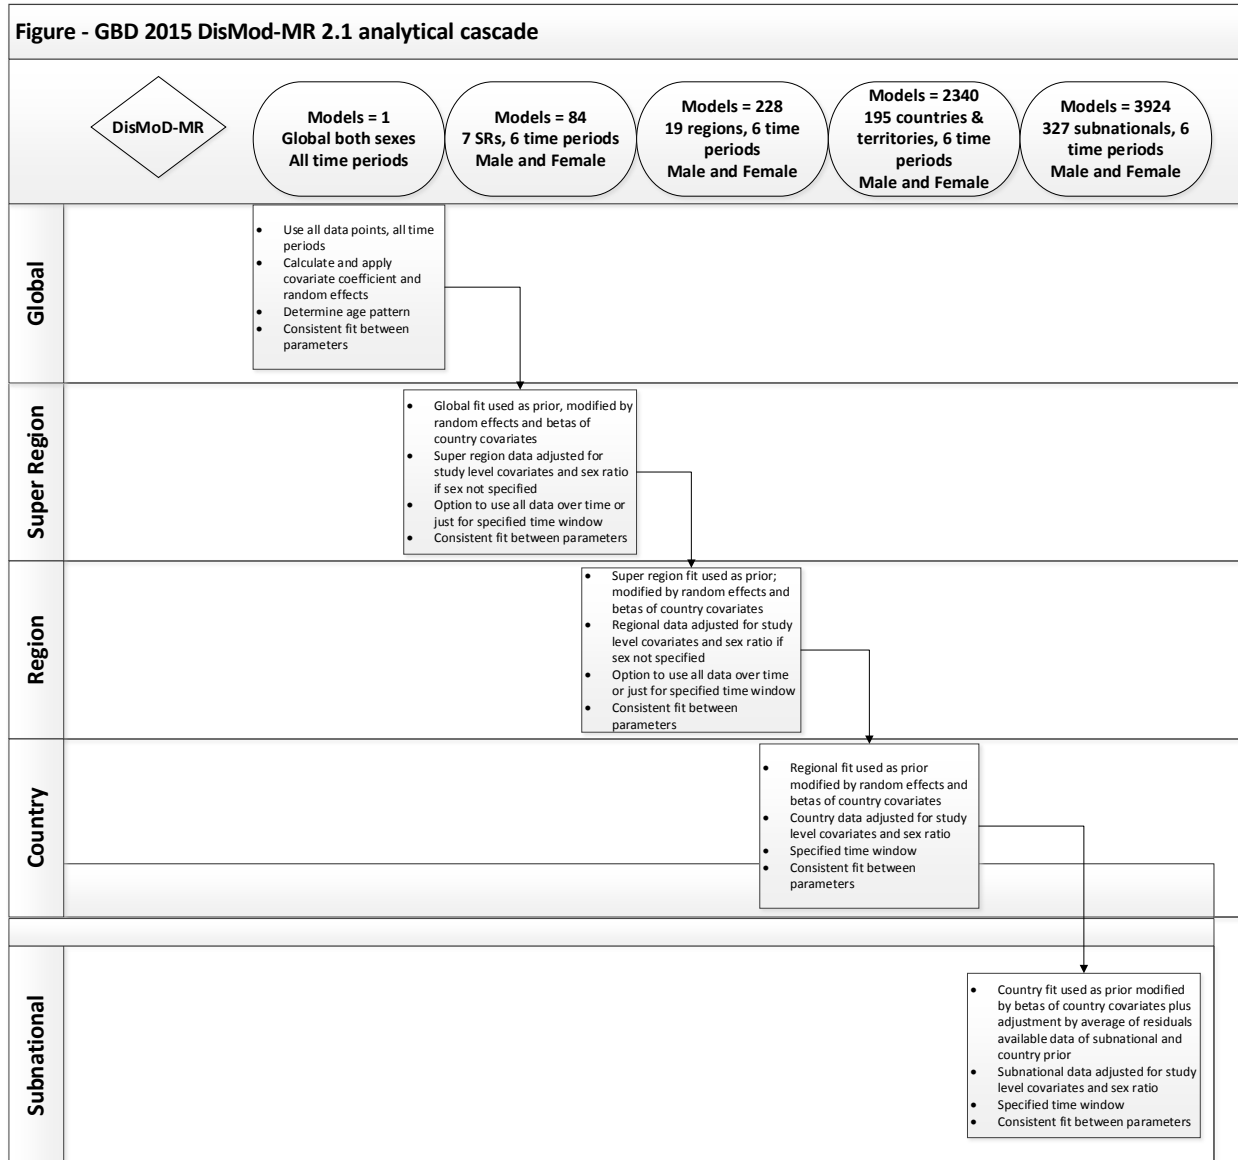

### DisMod-MR 2.1 likelihood estimation

Analysts have the choice of using a Gaussian, log-Gaussian, Laplace, or log-Laplace likelihood function in DisMod-MR 2.1. The default log-Gaussian equation for the data likelihood is:

$$-\log[p(y_j|\Phi)] = \log(\sqrt{2\pi}) + \log(\delta_j + s_j) + \frac{1}{2} \left( \frac{\log(a_j + \eta_j) - \log(m_j + \eta_j)}{\delta_j + s_j} \right)^2$$

where,  $y_j$  is a ‘measurement value’ (i.e. data point);  $\Phi$  denotes all model random variables;  $\eta_j$  is the offset value, eta, for a particular ‘integrand’ (prevalence, incidence, remission, excess mortality rate, with-condition mortality rate, cause-specific mortality rate, relative risk, or standardised mortality ratio), and  $a_j$  is the adjusted measurement for data point  $j$ , defined by:

$$a_j = e^{(-u_j - c_j)} y_j$$

where  $u_j$  is the total ‘area effect’ (i.e. the sum of the random effects at three levels of the cascade: super-region, region, and country) and  $c_j$  is the total covariate effect (i.e. the mean combined fixed effects for sex, study level, and country level covariates), defined by:

$$c_j = \sum_{k=0}^{K[I(j)]-1} \beta_{I(j),k} \hat{X}_{k,j}$$

with standard deviation

$$s_j = \sum_{l=0}^{L[I(j)]-1} \zeta_{I(j),l} \hat{Z}_{k,j}$$

where  $k$  denotes the mean value of each data point in relation to a covariate (also called x-covariate);  $l(j)$  denotes a data point for a particular integrand,  $j$ ;  $\beta_{I(j),k}$  is the multiplier of the  $k$ th x-covariate for the  $i$ th integrand;  $\hat{X}_{k,j}$  is the covariate value corresponding to the data point  $j$  for covariate  $k$ ;  $l$  denotes the standard deviation of each data point in relation to a covariate (also called z-covariate);  $\zeta_{I(j),k}$  is the multiplier of the  $l$ th z-covariate for the  $i$ th integrand; and  $\delta_j$  is the standard deviation for adjusted measurement  $j$ , defined by:

$$\delta_j = \log[y_j + e^{(-u_j - c_j)} \eta_j + c_j] - \log[y_j + e^{(-u_j - c_j)} \eta_j]$$

Where  $m_j$  denotes the model for the  $j$ th measurement, not counting effects or measurement noise and defined by:

$$m_j = \frac{1}{B(j) - A(j)} \int_{A(j)}^{B(j)} I_j(a) da$$

where  $A(j)$  is the lower bound of the age range for a data point;  $B(j)$  is the upper bound of the age range for a data point; and  $I(j)$  denotes the function of age corresponding to the integrand for data point  $j$ .

The source code for DisMod-MR 2.1 as well as the wrapper code are available at <http://ihmeuw.org/dismod-ode>.

<sup>i</sup> A Flaxman, C Murray, T Vos (Eds.) Integrated meta-regression framework for descriptive epidemiology. University of Washington Press, Seattle, WA; 2014

## 2.4 Natural history models

For some causes where cause of death data may be systematically biased due to either misclassification or because the disease exists in focal communities without vital registration or verbal autopsy studies, we have developed natural history models. In natural history models incidence and case-fatality rates are modeled separately, and then combined to produce estimates of cause-specific mortality. The 14 causes where natural history models have been used include: typhoid fever, paratyphoid fever, whooping cough, measles, visceral Leishmaniasis, African trypanosomiasis, yellow fever, congenital syphilis, and acute hepatitis A, B, C, and E. Descriptions of the modeling process for each of these causes follow.

# Typhoid fever

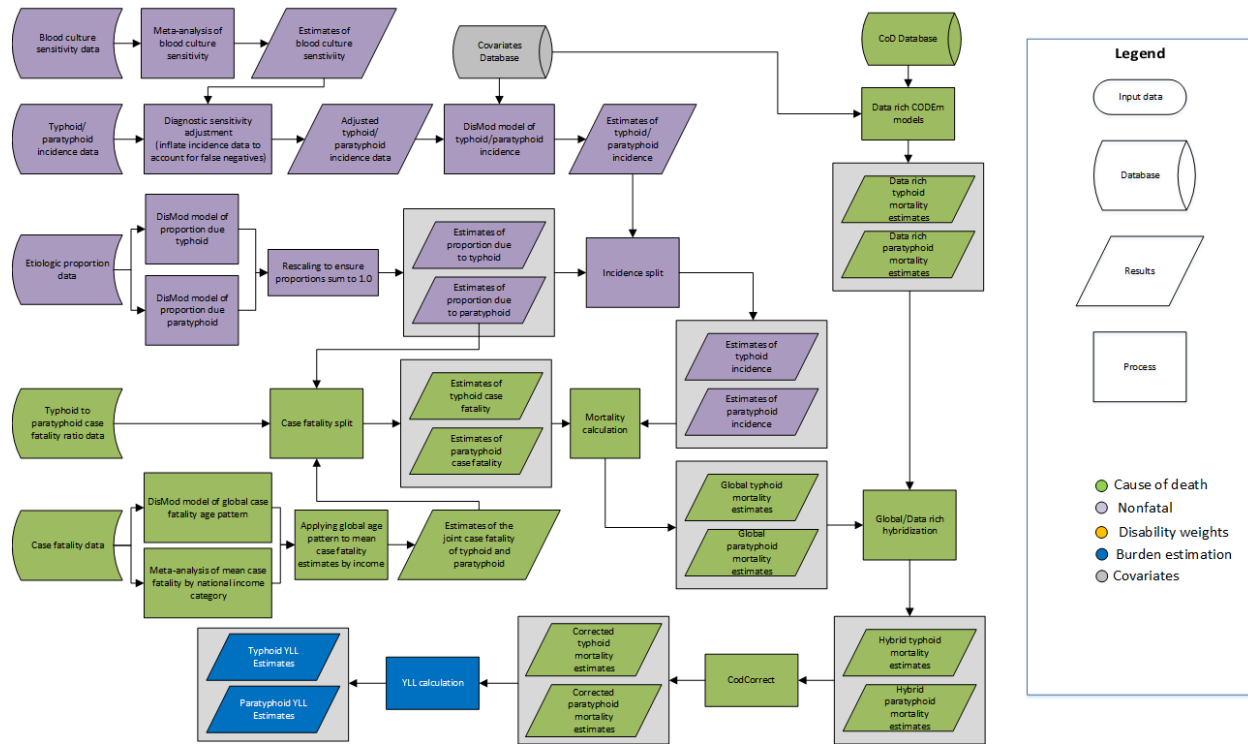

## Input data

Our incidence dataset included a combination of data from prospective cohort studies and national surveillance systems. Similarly, data on proportions due to typhoid and paratyphoid included a combination of prospective cohort studies and national surveillance systems. Case fatality data were from national surveillance systems and hospital databases. Our data-rich model uses vital registration data in our CoD database.

## Modeling strategy

We model typhoid deaths using a hybrid approach in which we model deaths in data-rich countries using CODEm with VR data, and model deaths in other countries using a natural history approach. For the natural history model we first model total incidence of typhoid and paratyphoid combined. Second, we model the proportion of this total due to typhoid and the proportion due to paratyphoid. Third, we estimate case fatality by age and national income category for typhoid and paratyphoid combined. Fourth, we use data on the relative fatality of typhoid and paratyphoid to split the joint case fatality estimates into typhoid- and paratyphoid-specific case fatality estimates. Finally, we estimate cause-specific mortality rates as the product of incidence and case fatality.

Total incidence was modeled using DisMod-MR, using the proportion of the population with access to clean water, and the proportion of the population living in the Indian Ocean monsoon belt as covariates. We performed a crosswalk using a study-level covariate indicating sources that were based on passive versus active surveillance, with active surveillance as the reference. This adjusts for incomplete case capture by passive surveillance. Incidence data were inflated to account for poor diagnostic sensitivity, based on a meta-analysis of the sensitivity of blood culture, the most common diagnostic used for typhoid. Similarly, we used two DisMod models to estimate etiologic proportions: one for the proportion of total incidence due to typhoid, and one for the proportion due to paratyphoid.

Case fatality data were too limited to allow for a complete DisMod model, or to allow for varying estimates by time and space. We had sufficient data, however, to estimate case fatality by age and by three categories of national income. We used DisMod to extract a global age-pattern in case fatality, and meta-regression to estimate the mean case fatality by income category. Finally, we estimated the relative risk of death from typhoid relative to paratyphoid based on data from Chinese surveillance and used that relative risk to estimate case fatality separately for typhoid and paratyphoid, by age and income.

Finally, we estimated typhoid mortality as the product of total incidence, the proportion of the total due to typhoid, and case fatality for typhoid. We propagated uncertainty through every step of the modeling process by pulling 1,000 draws from the distribution of each model component (e.g., incidence, proportion due to typhoid, overall case fatality, case fatality age pattern, relative fatalness of typhoid versus paratyphoid), and performing all calculations at the draw level.

Our model for GBD 2013 used the natural history approach for all countries. We have implemented the hybrid approach for GBD 2015 and now estimate typhoid deaths in data-rich countries based on a CODEm model of VR data.



# Paratyphoid fever

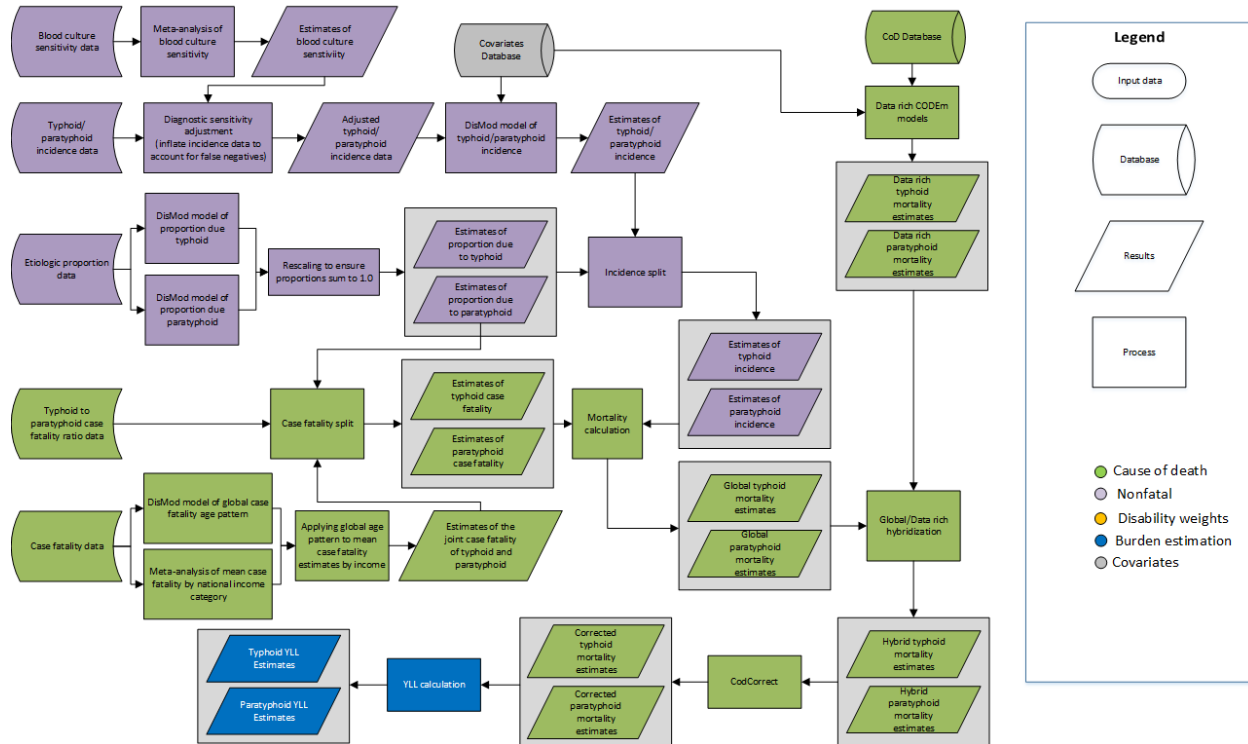

## Input data

Our incidence dataset included a combination of data from prospective cohort studies and national surveillance systems. Similarly, data on proportions due to typhoid and paratyphoid included a combination of prospective cohort studies and national surveillance systems. Case fatality data were from national surveillance systems and hospital databases. Our data-rich model uses vital registration data in our CoD database.

## Modeling strategy

We model paratyphoid deaths using a hybrid approach in which we model deaths in data-rich countries using CODEm with VR data, and model deaths in other countries using a natural history approach. For the natural history model we first model total incidence of typhoid and paratyphoid combined. Second, we model the proportion of this total due to typhoid and the proportion due to paratyphoid. Third, we estimate case fatality by age and national income category for typhoid and paratyphoid combined. Fourth, we use data on the relative fatality of typhoid and paratyphoid to split the joint case fatality estimates into typhoid- and paratyphoid-specific case fatality estimates. Finally, we estimate cause-specific mortality rates as the product of incidence and case fatality.

Total incidence was modeled using DisMod-MR, using the proportion of the population with access to clean water and the proportion of the population living in the Indian Ocean monsoon belt as covariates. We performed a crosswalk using a study-level covariate indicating sources that were based on passive versus active surveillance, with active surveillance as the reference. This adjusts for incomplete case capture by passive surveillance. Incidence data were inflated to account for poor diagnostic sensitivity, based on a meta-analysis of the sensitivity of blood culture, the most common diagnostic used for paratyphoid. Similarly, we used two DisMod models to estimate etiologic proportions: one for the proportion of total incidence due to typhoid, and one for the proportion due to paratyphoid.

Case fatality data were too limited to allow for a complete DisMod model, or to allow for varying estimates by time and space. We had sufficient data, however, to estimate case fatality by age and by three categories of national income. We used DisMod to extract a global age-pattern in case fatality, and meta-regression to estimate the mean case fatality by income category. Finally, we estimated the relative risk of death from typhoid relative to paratyphoid based on data from Chinese surveillance and used that relative risk to estimate case fatality separately for typhoid and paratyphoid, by age and income.

Finally, we estimated paratyphoid mortality as the product of total incidence, the proportion of the total due to paratyphoid, and case fatality for paratyphoid. We propagated uncertainty through every step of the modeling process by pulling 1,000 draws from the distribution of each model component (e.g., incidence, proportion due to paratyphoid, overall case fatality, case fatality age pattern, relative fatality of typhoid versus paratyphoid), and performing all calculations at the draw level.

Our model for GBD 2013 used the natural history approach for all countries. We have implemented the hybrid approach for GBD 2015 and now estimate paratyphoid deaths in data-rich countries based on a CODEm model of VR data.

# Whooping cough

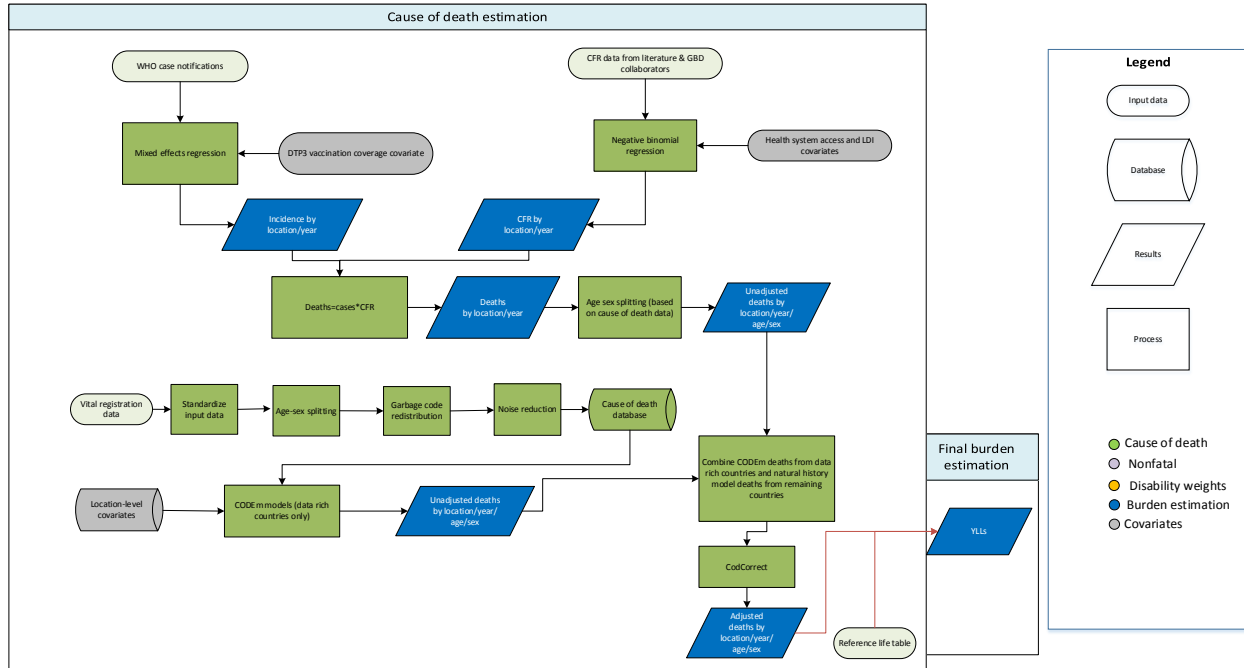

## Input data

Vital registration data from the cause of death database were used for data-rich countries. For the natural history model, we used WHO case notifications data, historical case notifications for the UK back to 1940, and case fatality data identified by collaborators and through systematic literature reviews for GBD 2010 and GBD 2013. The PubMed search query for GBD 2013 was: (whooping cough [Title/Abstract]) OR (pertussis [Title/Abstract]) AND (case fatality [Title/Abstract]) AND ("2009"[Date - Publication]: "2013"[Date - Publication]). The literature review was not updated for GBD 2015.

## Modeling strategy

Mortality was modeled two ways. For data-rich countries (i.e., countries with vital registration more than 95% complete for more than 25 years), we used CODEm with DTP3 vaccination coverage, lagged distributed income, and education as country-level covariates. We estimated for the age range post-neonatal to 59 years. For the remaining countries, we used a natural history-based model since CODEm did not predict well for those countries. First, we modeled incidence using case notifications from the WHO (1985-2014) with the DTP3 vaccination coverage covariate. Historical data of UK cases and UK DTP3 coverage rates (both back to 1940) were also used in the incidence model. More precisely, log-transformed reported incidence rates were regressed on the log of the fraction unvaccinated with a random effect on country. The random effect by country allowed for registration completeness to vary by country. The results of this model were then used to predict incidence as a function of vaccine coverage. We used a value of the random effect that matched the highest random effect in a high

income region, Switzerland (which has a pertussis monitoring system which should capture cases well). Uncertainty was estimated by taking 1,000 iterations of the predictions based on the variance covariance matrix. Second, we modeled CFR using a negative binomial model with the health system access and LDI covariates. Uncertainty was estimated by taking 1,000 iterations of the predictions based on the variance covariance matrix and a random sample from a gamma distribution. Finally, whooping cough deaths were calculated at the 1,000 draw level as

$$deaths = incidence * CFR$$

We first estimated overall number of deaths, which were then assigned an age-sex distribution based on the age-sex-specific patterns found in the cause of death data.

## Measles

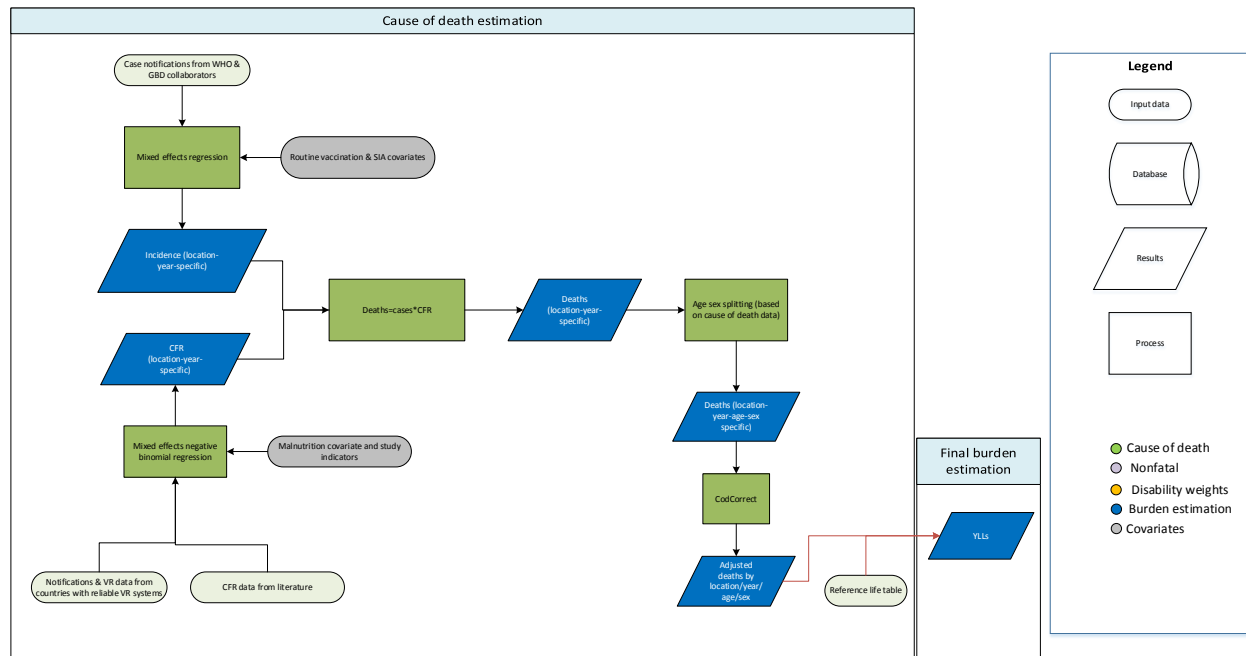

### Input data

The input data for the measles incidence model were measles case notifications from the World Health Organization (WHO) and the GBD collaborators. We included notifications data from 1995 to 2014 in the mixed-effects regression. We dropped data prior to 1995 because of sparse and noisy data in earlier years. Case fatality rates (CFRs) were derived from the case notifications and vital registration (VR) data in countries in the following three super-regions: high-income; Central Europe/Eastern Europe/Central Asia; and Latin America and Caribbean. These CFRs were used in combination with CFR data identified by collaborators and through systematic literature reviews for GBD 2010 and GBD 2013. The PubMed search query for GBD 2013 was: (measles[Title/Abstract]) AND (case fatality[Title/Abstract]) AND ("2009"[Date - Publication] : "2013"[Date - Publication]). The literature review was not updated for GBD 2015. Studies were included if they reported CFR, number of deaths, and number of cases. Studies were excluded if they included non-representative minority samples only.

### Modeling strategy

Measles mortality was modeled using a natural-history-based model. First, incidence was modeled using routine vaccination rates and supplementary immunization activities (SIAs) data. More precisely, log-transformed incidence rates were regressed on the log of the proportion unvaccinated, SIA variables lagged by one, two, three, four, and five years, with super-region, region, and country random effects. The results of this mixed effects regression model were then used to predict location-year-specific incidence as a function of vaccine coverage and SIAs. Uncertainty was estimated by taking 1,000 iterations of the predictions based on the variance covariance matrix. For locations in the following three super-regions, namely, high-income, Central Europe/Eastern Europe/Central Asia and Latin America and Caribbean, we directly used reported measles cases as incidence cases. Second, CFR was

modeled using a mixed effects negative binomial regression with the malnutrition covariate and study indicators (hospital-based or not; outbreak or not; and rural or urban/mixed), with country random effects. Uncertainty was estimated by taking 1,000 iterations of the predictions based on the variance covariance matrix and uncertainty in country random effects. The fit of the model was evaluated using diagnostic plots of predicted versus observed values. Finally, estimated incidence was multiplied by CFR (both at the 1,000 draw level) to get overall number of deaths, which were then assigned an age-sex distribution based on the age-sex-specific patterns found in the COD data.

# Visceral leishmaniasis

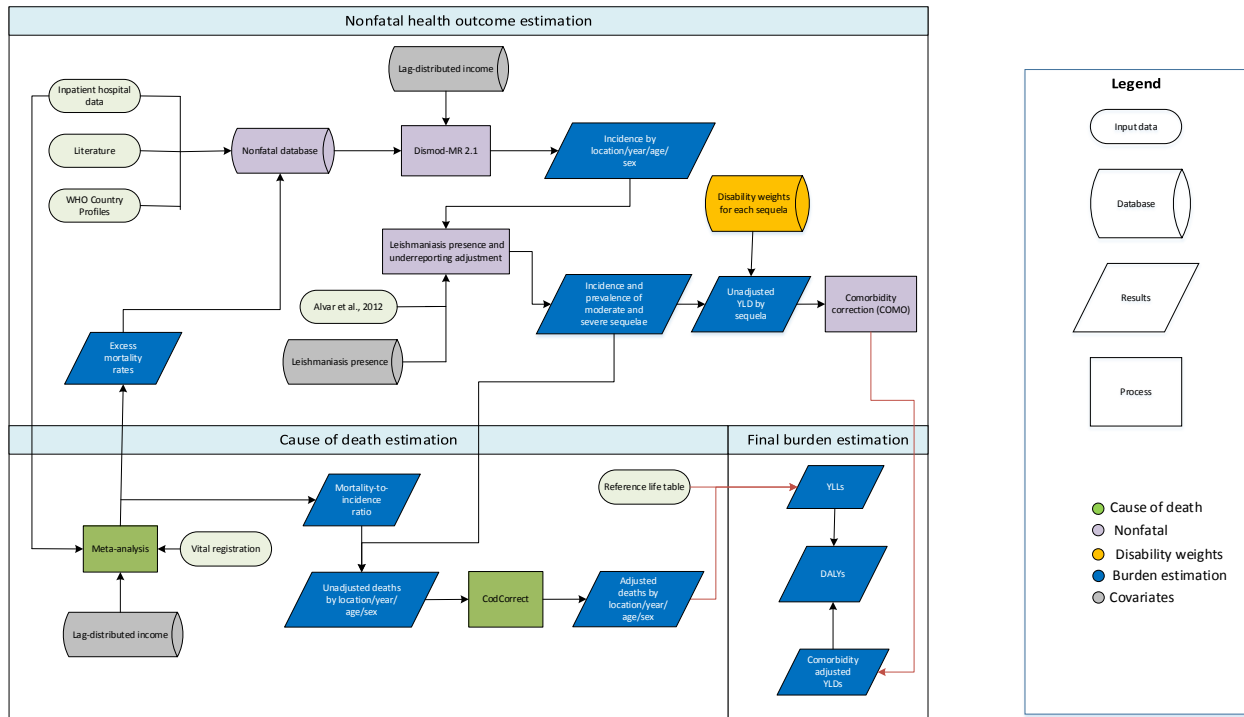

## Input data

No mortality data from GBD 2015 were used in the estimation of visceral leishmaniasis. Details on the collection of incidence and prevalence data are detailed in the GBD 2015 nonfatal health study.

## Modeling strategy

In GBD 2013, we estimated country-year-specific MI ratios by running a linear regression of the logit of the MI ratio on the log of income per capita using vital registration and inpatient hospital data from Brazil and Spain, two countries in which we had both reliable mortality and incidence data at the national level. Those ratios were used here. This ratio was used in two ways; first, in assuming a duration of 3 months, we were able to derive excess mortality for use in DisMod. Second, the product of the M:I ratio and cases then estimated by DisMod were used as death estimates for CoDCorrect.

# Human African Trypanosomiasis (HAT)

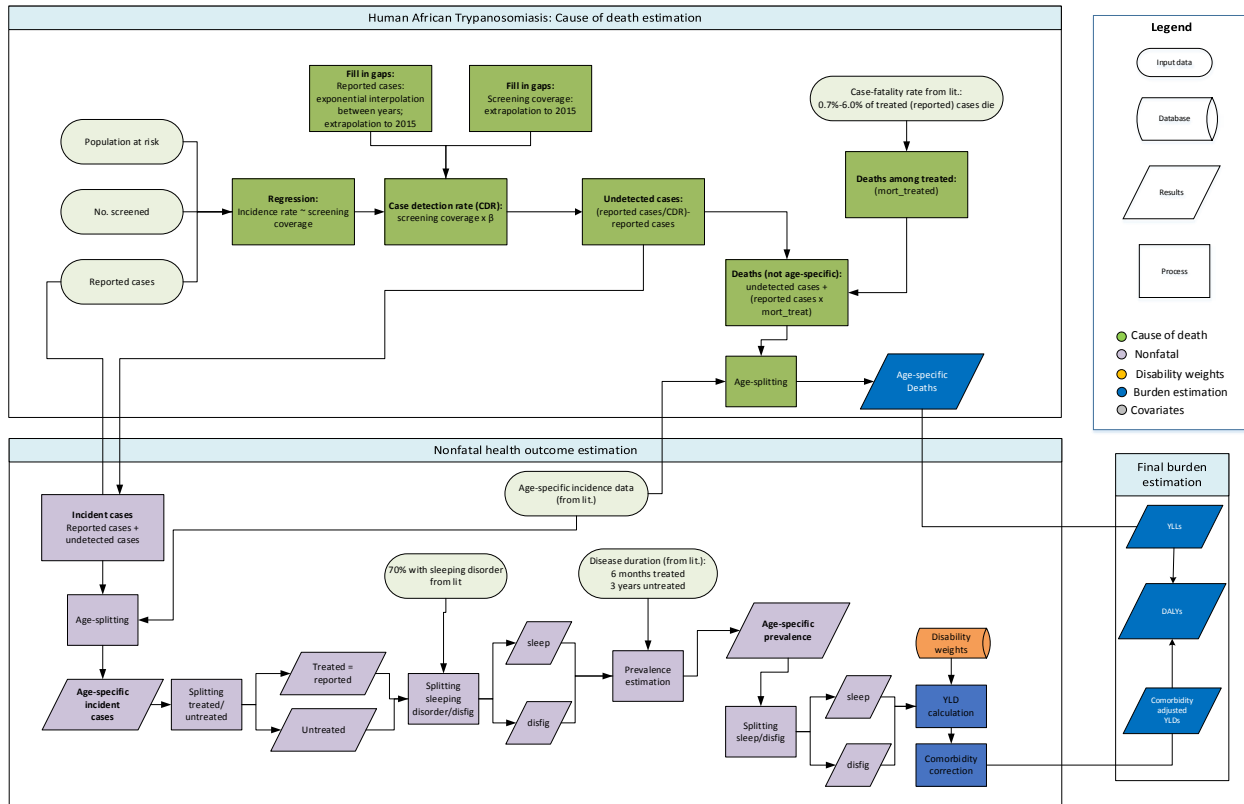

## Input data

A literature search was done for GBD 2013 and for GBD 2015. The GBD 2015 search was conducted between 1/1/2013 and 8/10/2015, and the number of initial hits was 87. Of these, five sources were extracted for data.

Additional input data used to estimate mortality due to HAT included a) population at risk estimates from GBD 2010 ArcGIS analysis using geocoded case notifications for 2000 to 2009<sup>1</sup> and population Count Grid estimates from Gridded Population of the World 3,<sup>2,3</sup> b) population screened from 1997 to 2004,<sup>4</sup> c) historical data from GBD 2010 on total number of HAT cases reported<sup>1,4,5</sup> and d) cases reported annually to the WHO<sup>6</sup> – for Kenya, a study on cases reported subnationally<sup>7</sup> was used to split the national cases into five counties (HomaBay, Migori, Busia, Bungoma, Kakamega). In addition, age-specific incidence data from active screening undertaken in the Democratic Republic of Congo<sup>8</sup> and Uganda<sup>9</sup> were used to inform age pattern for deaths.

## Modeling strategy

The cause of death model for HAT involved seven main steps. First, a multi-level mixed-effects linear regression of natural log-transformed incidence rate (ratio of HAT cases reported to population at risk) on natural log-transformed screening coverage (ratio of number screened for HAT to population at risk), with country random effects, was performed. Gaps were then filled using exponential interpolation between years and extrapolation from 2014 to 2015 for reported cases; for screening coverage only



extrapolation from 2014 to 2015 was done. One thousand draws of mortality among treated cases were then generated, assuming that 0.7% - 6.0% of all treated (reported) cases die.<sup>10-12</sup> This was followed by the generation of 1,000 draws of case detection rate (CDR), given the expected screening coverage from the regression. Undetected deaths were then estimated as the difference between the ratio of reported cases to CDR and reported cases (reported cases/CDR – reported cases). Estimates of death were obtained by adding the reported cases (scaled by mortality among treated) to the undetected cases. Without information on sex-specific incidence or deaths, equal death rates between both sexes was assumed. Finally, an age-pattern was applied to the mortality estimates using the incidence studies from DRC and Uganda.<sup>8,9</sup>

A few changes from GBD 2013 were made to the estimation of deaths due to HAT. To begin with, new data on reported cases from WHO<sup>6</sup> (years 2013 and 2014 for 23 locations) were included. In addition, based on available historical data post-1980, the following countries (years) were included in the estimation: Botswana (1983), Ethiopia (1980-1983), Guinea-Bissau (1980-1983, 1985-1987), Rwanda (1980, 1982-1988), and Sierra Leone (1981-1982). Five subnational locations (out of 49) for Kenya were also added in the estimation for GBD 2015. Finally, the age-split proportion was corrected such that a 0.32/0.68 proportion was used for adults/children. In GBD 2013, this proportion was 0.25/0.75 for adults/children.

#### References:

- 1 Simarro PP, Cecchi G, Paone M, *et al.* The Atlas of human African trypanosomiasis: a contribution to global mapping of neglected tropical diseases. *Int J Health Geogr* 2010; **9**: 57.
- 2 Gridded Population of the World (GPW), Version 3: Population Count Grid. Palisades, NY: Socioeconomic Data and Applications Center (SEDAC); Center for International Earth Science Information Network (CIESIN) at Columbia University; Centro Internacional de Agricultura Tropical (CIAT), 2005.
- 3 Gridded Population of the World (GPW), Version 3: Population Count Grid, Future Estimates. Palisades, NY: Socioeconomic Data and Applications Center (SEDAC); Center for International Earth Science Information Network (CIESIN) at Columbia University; United Nations Food and Agriculture Programme (FAO); Centro Internacional de Agricultura Tropical (CIAT), 2005.
- 4 Weekly Epidemiological Record (WER). World Health Organization, 2006.
- 5 World Health Organization, Department of Communicable Disease Surveillance and Response (CDS). WHO Report on Global Surveillance of Epidemic-prone Infectious Diseases. World Health Organization, 2000.
- 6 World Health Organization. Human African Trypanosomiasis. Global Health Observatory data repository. <http://apps.who.int/gho/data/node.main.A1635?lang=en> (accessed April 21, 2016).
- 7 Rutto JJ, Karuga JW. Temporal and spatial epidemiology of sleeping sickness and use of geographical information system (GIS) in Kenya. *J Vector Borne Dis* 2009; **46**: 18–25.
- 8 Lutumba P, Makieya E, Shaw A, Meheus F, Boelaert M. Human African trypanosomiasis in a rural community, Democratic Republic of Congo. *Emerging Infect Dis* 2007; **13**: 248–54.

- 9 Fèvre EM, Odiit M, Coleman PG, Woolhouse MEJ, Welburn SC. Estimating the burden of rhodesiense sleeping sickness during an outbreak in Serere, eastern Uganda. *BMC Public Health* 2008; **8**: 96.
- 10 Balasegaram M, Harris S, Checchi F, Ghorashian S, Hamel C, Karunakara U. Melarsoprol versus eflornithine for treating late-stage Gambian trypanosomiasis in the Republic of the Congo. *Bull World Health Organ* 2006; **84**: 783–91.
- 11 Odiit M, Kansiime F, Enyaru JC. Duration of symptoms and case fatality of sleeping sickness caused by *Trypanosoma brucei rhodesiense* in Tororo, Uganda. *East Afr Med J* 1997; **74**: 792–5.
- 12 Priotto G, Kasparian S, Mutombo W, *et al.* Nifurtimox-eflornithine combination therapy for second-stage African *Trypanosoma brucei gambiense* trypanosomiasis: a multicentre, randomised, phase III, non-inferiority trial. *Lancet* 2009; **374**: 56–64.

# Yellow fever

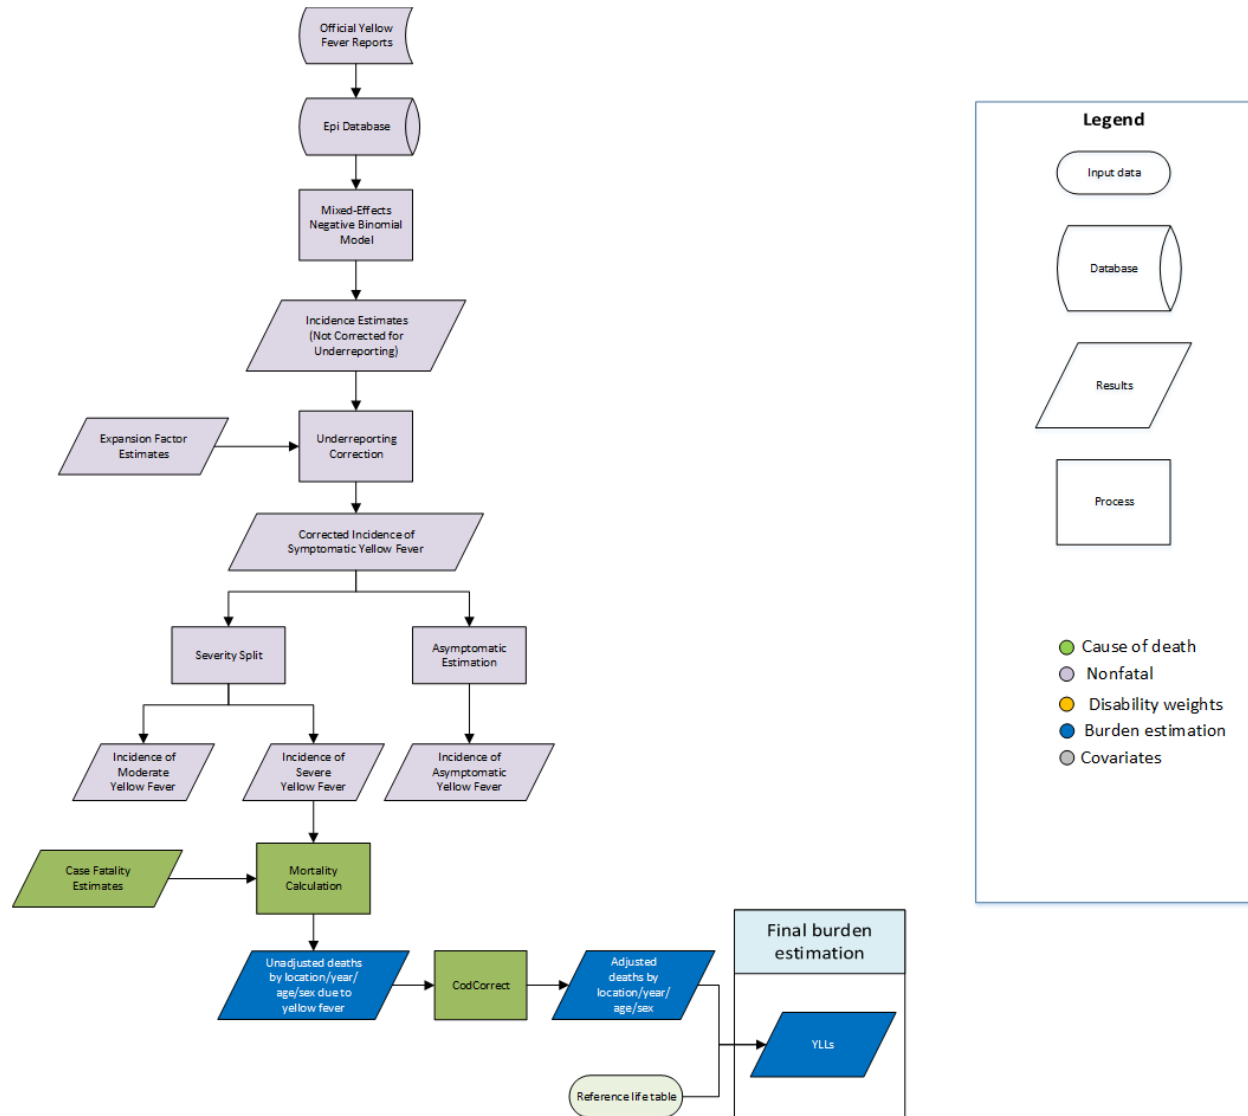

## Input data

Case data come from official case reports filed with the World Health Organization. Data on case fatality come from published studies of yellow fever fatality. Data on deaths in non-endemic countries is restricted to only vital registration data.

## Modeling strategy

We model yellow fever deaths using a hybrid approach. For countries in which yellow fever is endemic, we use a natural history approach in which we estimate deaths as the product of cases and case fatality. For non-endemic countries, we allow for deaths among imported cases where we have vital registration data indicating yellow fever deaths. That is, we assume no yellow-fever deaths in non-endemic

countries; however, where yellow fever deaths are reported in vital registration data, we accept those as true imported yellow fever deaths.

We model reported cases using a mixed-effects negative binomial model, with fixed effects for year and random effects for super-region, region, and country. We assume that yellow fever cases are underreported and that this underreporting mirrors that of dengue (a disease for which we have better data on underreporting). With that, we estimate symptomatic cases as the product of our base case estimates and dengue expansion factors (i.e., the factor by which you must multiply reported cases to derive true cases). Based on published estimates, we assume that 27% of symptomatic cases will be severe.<sup>1</sup>

We performed a meta-analysis of case fatality using data from published studies of yellow fever fatality. Studies tend to report deaths among those with severe infection (e.g., hospitalized cases), rather than among all cases. We assume that no deaths occur with asymptomatic infection or among those with only moderate symptoms. With that, we estimate deaths as the product of severe cases and case fatality.

We have improved our method for correcting for underreporting of yellow fever. In estimating yellow fever deaths for GBD 2013, our model assumed that all severe cases were reported and that reported cases reflected only severe cases. With that, we adjusted our base estimates upward to account for non-severe cases, and based our mortality estimates off these adjusted numbers. Based on feedback from collaborators, we believe that this adjustment was inadequate to fully account for underreporting. Accordingly, we have adopted the expansion factor based method described above for GBD 2015.

Moreover, we have adopted the hybrid approach for GBD 2015. Whereas we previously allowed no yellow fever deaths in non-endemic countries, we now accept deaths reported in vital registration data as true imported deaths.

## Reference

1 Johansson MA, Vasconcelos PFC, Staples JE. The whole iceberg: estimating the incidence of yellow fever virus infection from the number of severe cases. *Trans R Soc Trop Med Hyg* 2014; 108: 482–7.

# Sexually transmitted infections excluding HIV

This write-up covers causes including congenital syphilis, which was run as a natural history model.

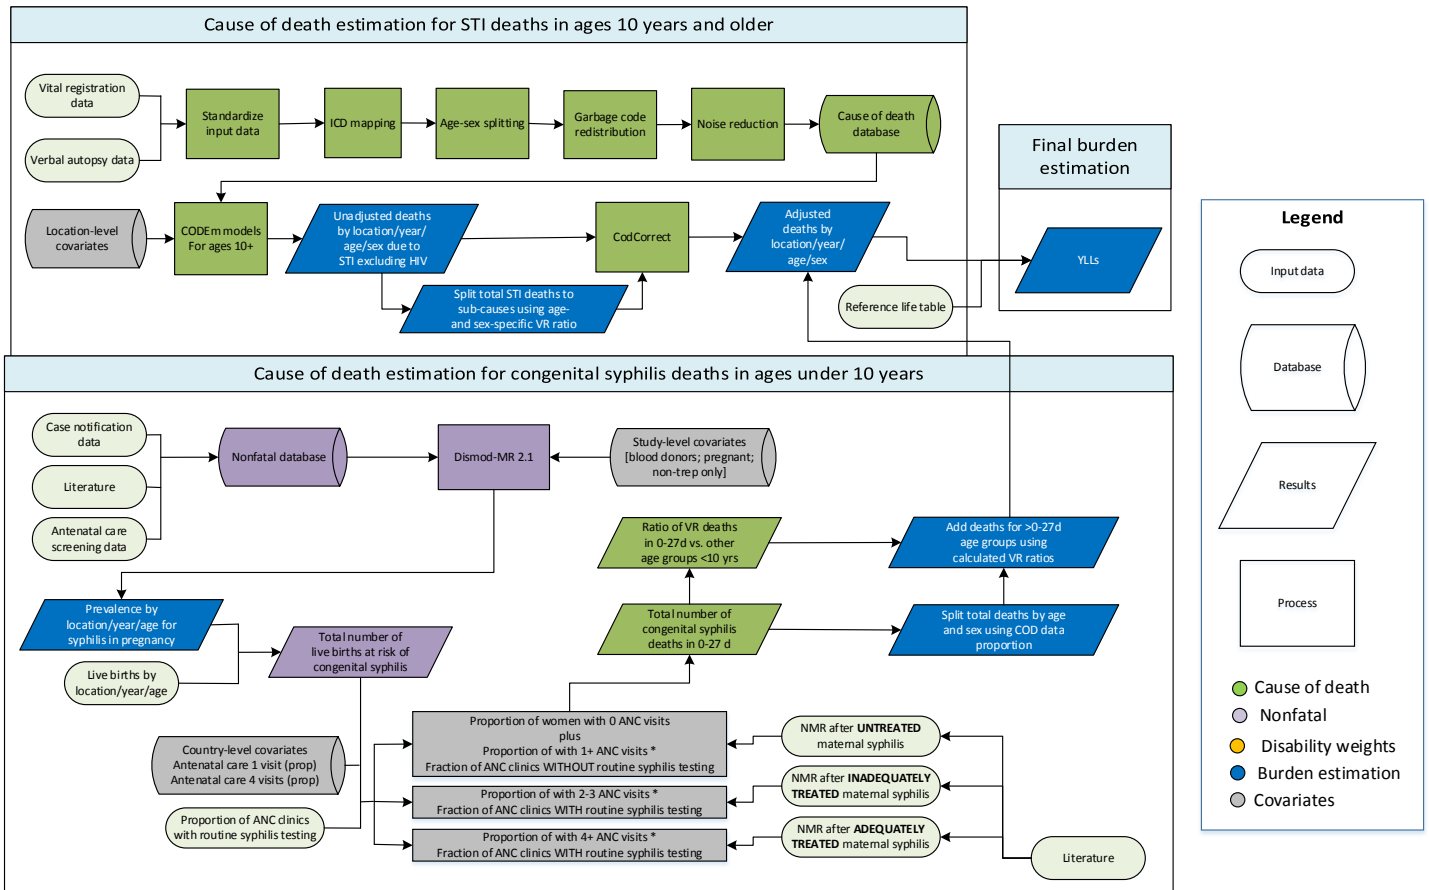

## Input data

CODEm models for males and females 10 years and older were informed from centrally prepped data stored in the cause of death (COD) database. All data from all geographies were reviewed. Outliers were identified as those data where age patterns or temporal patterns were inconsistent with neighboring age groups or locations or where sparse data were predicting implausible overall temporal or age patterns for a given location.

Four different types of data were used for the NHM model. First, we used literature, survey, and report data described below to estimate early syphilis in pregnancy. Second, we used GBD 2015 estimates of antenatal care (ANC) coverage data from our covariates database and live births estimates from our demographics analysis. Third, we used published data from the Global Health Observatory on proportion of ANC clinics that test for syphilis and the proportion of women testing positive who receive treatment. Fourth, we used the results of a systematic literature review completed for GBD 2010 to inform excess mortality of neonates born with syphilis.

We completed data-rich (DR) and global CODEm models for ages 10 years and over for males and females separately. Nine covariates were used in each CODEm model, including 1) syphilis prevalence in pregnancy from DisMod-MR 2.1 analysis described below; 2) coverage of one antenatal care (ANC) visit, 3) coverage of four ANC visits; 4) age-specific fertility rate; 5) total fertility rate; 6) health system access, a principal components analysis of ANC, in-facility delivery, skilled birth attendance, and vaccine coverage; 7) national income per capita (LDI); 8) years of education per capita; and 9) abortion legality, a categorical variable that ranges from 1 (always illegal) to 7 (always legal on demand).

The overall CODEm model for STI was split into the sub-causes using vital registration (VR) data from the COD database. Trichomoniasis and HSV-2 are assumed not to cause mortality. Chlamydia is further assumed not to cause death in males. Cause-specific mortality rate VR data for each age-group, sex, and year were summed and scaled to match the total STI cause-specific mortality rate predicted by CODEm. This VR pattern was applied globally to all locations.

Our NHM for congenital syphilis began with estimation of early syphilis prevalence in all age-groups, both sexes, all GBD locations, and in each year from 1990 to 2015. Systematic literature review was combined with review of all publicly available UN GASS country progress reports, antenatal clinic surveillance data from country-specific and UNAIDS reports, targeted searches of national ministry of health (MoH) websites, and other published data provided by GBD collaborators. A Pubmed search was completed on June 1, 2015, using the following search string:

```
("syphilis"[MeSH] OR "Treponema pallidum"[MeSH]) NOT "Yaws"[MeSH] AND  
("prevalence"[MeSH] OR "incidence"[MeSH]) AND "1990"[PDAT] : "2015"[PDAT] AND  
"humans"[MeSH]
```

A total of 1,265 titles and abstracts were found, of which 178 had suitable data for inclusion in our dataset. In addition to standard demographic identifiers, all data were extracted to include number of cases, prevalence or incidence rate, and sample size. Laboratory testing modality for each study was specified as including treponemal test, non-treponemal test, both treponemal and non-treponemal, or direct spirochete detection (e.g., darkfield microscopy). Usage of treponemal and non-treponemal testing was the reference category. Our final dataset included data from 113 distinct geographies. Data from blood donor and pregnant populations were included, but all other high-risk groups were excluded.

### **Modeling strategy**

We modeled early syphilis in DisMod-MR 2.1, restricting incidence before the age of 10 and after the age of 65 and assuming excess mortality from early syphilis is very low ( $\leq 1$  death per 10,000 person-years). Study-level covariates identified data in non-reference categories (pregnant, blood donors) and using non-reference testing modalities (e.g., treponemal test only, non-treponemal test only) and were crosswalked to the reference category within the DisMod-MR 2.1 cascade, predicting specific conversion values for each country. The latter specification of country-level crosswalks was chosen because the bias between non-reference populations and testing modalities was assumed to differ by geography and as a function of, for example, endemicity of acute infectious agents like malaria.

Age-specific prevalence results were paired with age-specific live birth results to generate total number of births at risk of congenital syphilis. To estimate the actual number of congenital syphilis births, we combined information on ANC coverage from GBD 2015 covariates analyses with ANC syphilis testing

and treatment data from GHO. Adequate treatment was assumed to confer no risk of congenital syphilis mortality. Those with four ANC visits or 1-3 ANC visits with testing and treatment were assumed to have received adequate treatment. Inadequate treatment occurred in those women with 1-3 ANC visits without either testing or treatment or those women with one ANC visit but with testing and treatment. Those women with only one or fewer ANC visits and no syphilis testing or treatment were assumed to be untreated. Untreated and inadequate treatment proportions were combined with potential congenital syphilis births to estimate total neonatal syphilis births. Each categorical risk category was combined with corresponding neonatal excess mortality rates derived in GBD 2010. This total number of neonatal syphilis deaths was then split between 0-6 days and 7-27 days age groups using sex and age-specific VR data from the COD database. Congenital syphilis deaths beyond the neonatal period were likewise estimated using sex- and age-specific VR data. This VR pattern was applied globally to all locations.

The primary limitation of our estimation of STI deaths in those over 10 years old is data availability, especially from countries where VR systems are not available. Even in countries with VR, there may be some variation in practices for coding deaths to STI as the underlying cause, especially given the potentially variable presentation of many of the conditions in this category. Such variation is more likely to lead to underestimation of STI deaths than overestimation. Sub-cause estimation is similarly limited by data availability in those locations without VR data, and our estimates are thus based on the overall pattern of deaths in generally higher-income geographies. The primary implication of this limitation is that it decreases the resolution with which we can decompose the relationship between mortality from HIV and other STI. Our NHM for congenital syphilis was a significant improvement over GBD 2013 but still is limited by data availability issues, especially on the coverage and effectiveness of ANC interventions to prevent congenital syphilis. We do not have information on the proportion of women that tested positive who may have received treatment elsewhere, or information on the coverage of treatment for neonates, infants, and children born with congenital syphilis. Both limitations could potentially have led to lower estimates of congenital syphilis deaths. On the other hand, our DisMod-MR 2.1 analysis suggested that pregnant women may in fact have higher syphilis prevalence than the general population, which would have led to higher estimates. We have also not quantified the number of stillbirths associated with congenital syphilis. We will continue to work to address these shortcomings more thoroughly in future GBD analyses.

## Acute hepatitis A

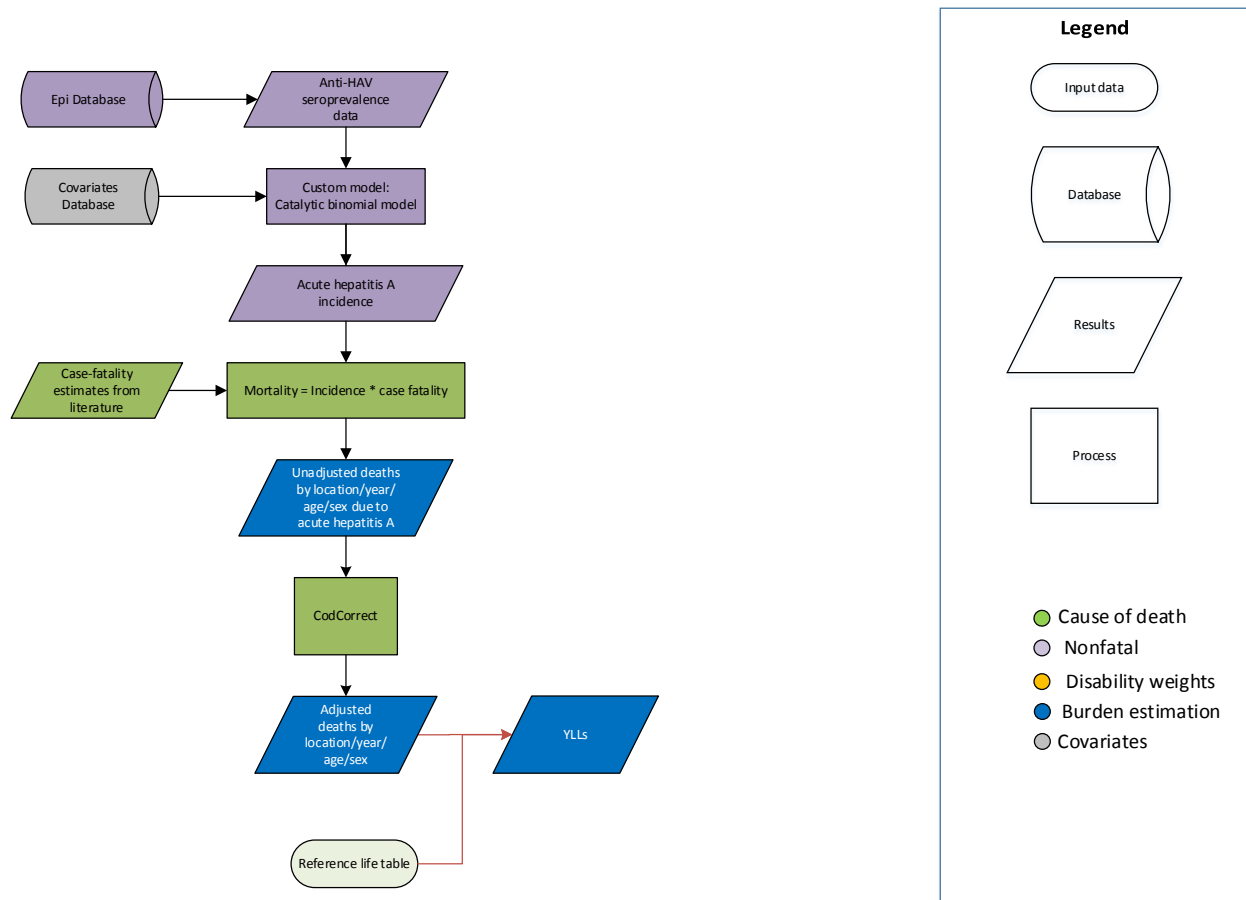

### Input data

We use anti-HAV seroprevalence data from population-based studies and surveys for the incidence model.

### Modeling strategy

Virus-specific CoD data for acute hepatitis are inconsistently reported and of questionable accuracy. We therefore use a two-part modeling strategy for acute hepatitis A, B, C, and E. First, we develop a parent acute hepatitis mortality model using CODEm and all acute hepatitis mortality data within the CoD database. Second, we develop four separate natural history models to estimate deaths from acute hepatitis A, B, C, and E, respectively. Finally, we rescale the virus-specific death estimates from the four natural history models to fit within the envelope defined by the parent acute hepatitis CoD model.

Given its reasonably stable force of infection among susceptible people across age groups, we used a catalytic binomial model to estimate incidence of acute hepatitis A based on anti-HAV seroprevalence. The catalytic binomial model is a binomial generalized linear model with a complementary log-log link, and an offset term for log-age. Since anti-HAV is a lifetime marker of past infection, and a given individual can only be infected once, seroprevalence at age  $t$  is equal to the cumulative incidence (CI) over  $t$  years. Assuming constant force of infection, we can estimate the incidence rate (IR) as,



$$CI = 1 - e^{-IR \cdot t}$$

We can rearrange this equation to solve for the log-IR:

$$\ln(IR) = \frac{\ln(-\ln(1 - CI))}{\ln(t)}$$

Thus, by using the complimentary log-log link for CI (i.e.,  $\ln(-\ln(1-CI))$ ) with an offset for log-age, we are able to model the incidence rate of infection from seroprevalence data. To inform the model in the absence of data we use a predictive covariate derived from principal components analysis of lag-distributed income (LDI) and the proportion of the population with access to improved water. We use a mixed effects model with fixed effects on the aforementioned PCA-derived covariate, and nested hierarchical random effects on super-region, region, country, and subnational geographies.

Our overall approach has not changed from that used in GBD 2013. However, whereas we previously used a fixed-effects only catalytic binominal model for GBD 2013, we have incorporated random effects into the model for GBD 2015, improving the spatial structure of the model and allowing the model to better follow data.

## Acute hepatitis B

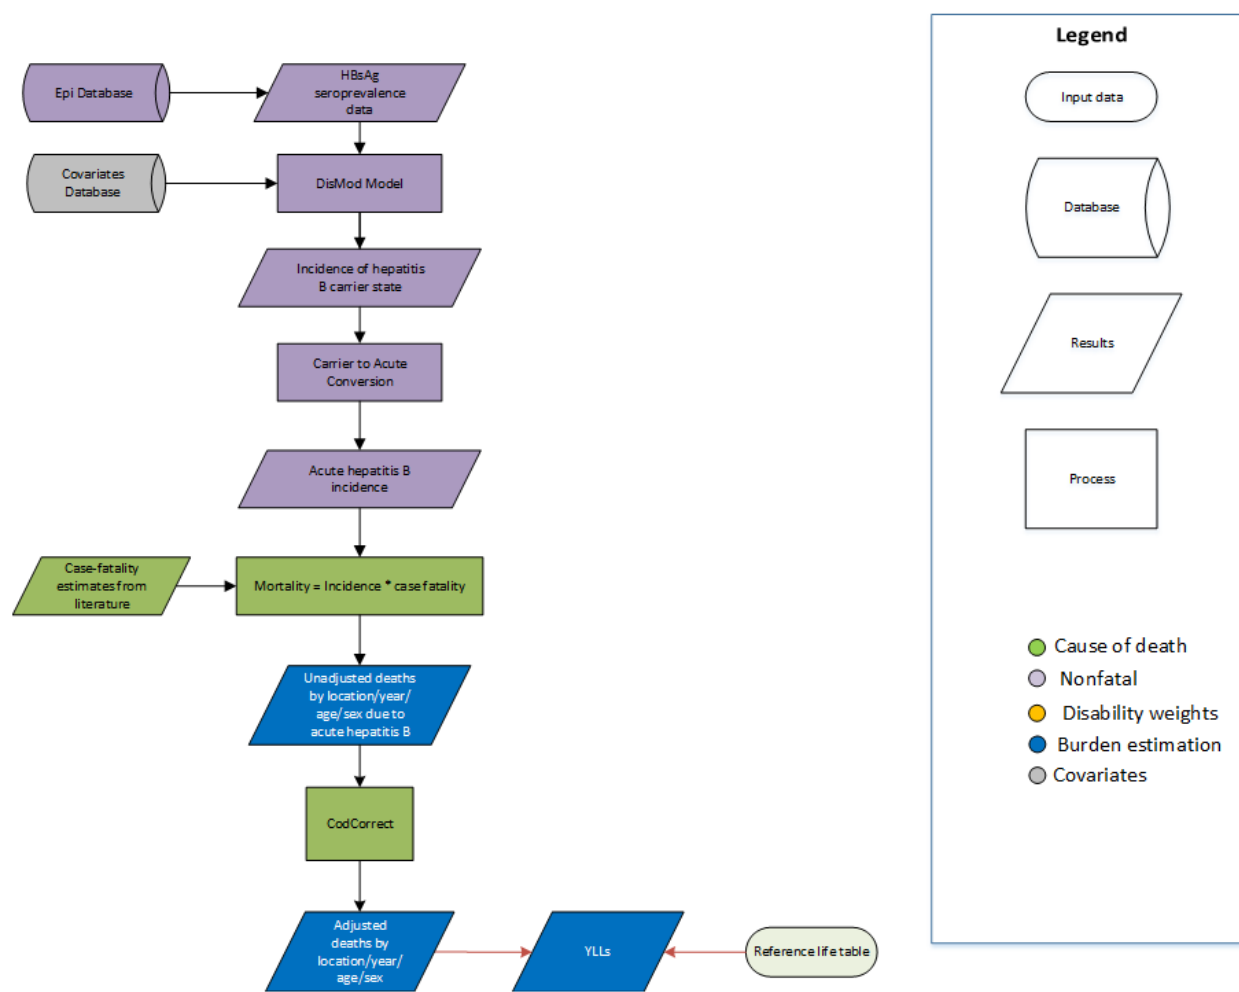

### Input data

We use hepatitis B surface antigen (HBsAg) seroprevalence data from population-based studies and surveys for the incidence model.

### Modeling strategy

Virus-specific CoD data for acute hepatitis are inconsistently reported and of questionable accuracy. We therefore use a two-part modelling strategy for acute hepatitis A, B, C, and E. First, we develop a parent acute hepatitis mortality model using CODEm and all acute hepatitis mortality data within the CoD database. Second, we develop four separate natural history models to estimate deaths from acute hepatitis A, B, C, and E, respectively. Finally, we rescale the virus-specific death estimates from the four natural history models to fit within the envelope defined by the parent acute hepatitis CoD model.

We model the incidence of chronic HBsAg carriage using a full DisMod model of HBsAg seroprevalence. We then convert incidence of chronic carriage to total incidence of hepatitis B infection by dividing age-specific estimates of the incidence of chronic carriage by age-specific estimates of the probability of infection resulting in carriage. We then multiply these incidence estimates by published estimates of case fatality to estimate acute hepatitis B deaths.

We have made no substantive changes in the modeling strategy from GBD 2013.

## Acute hepatitis C

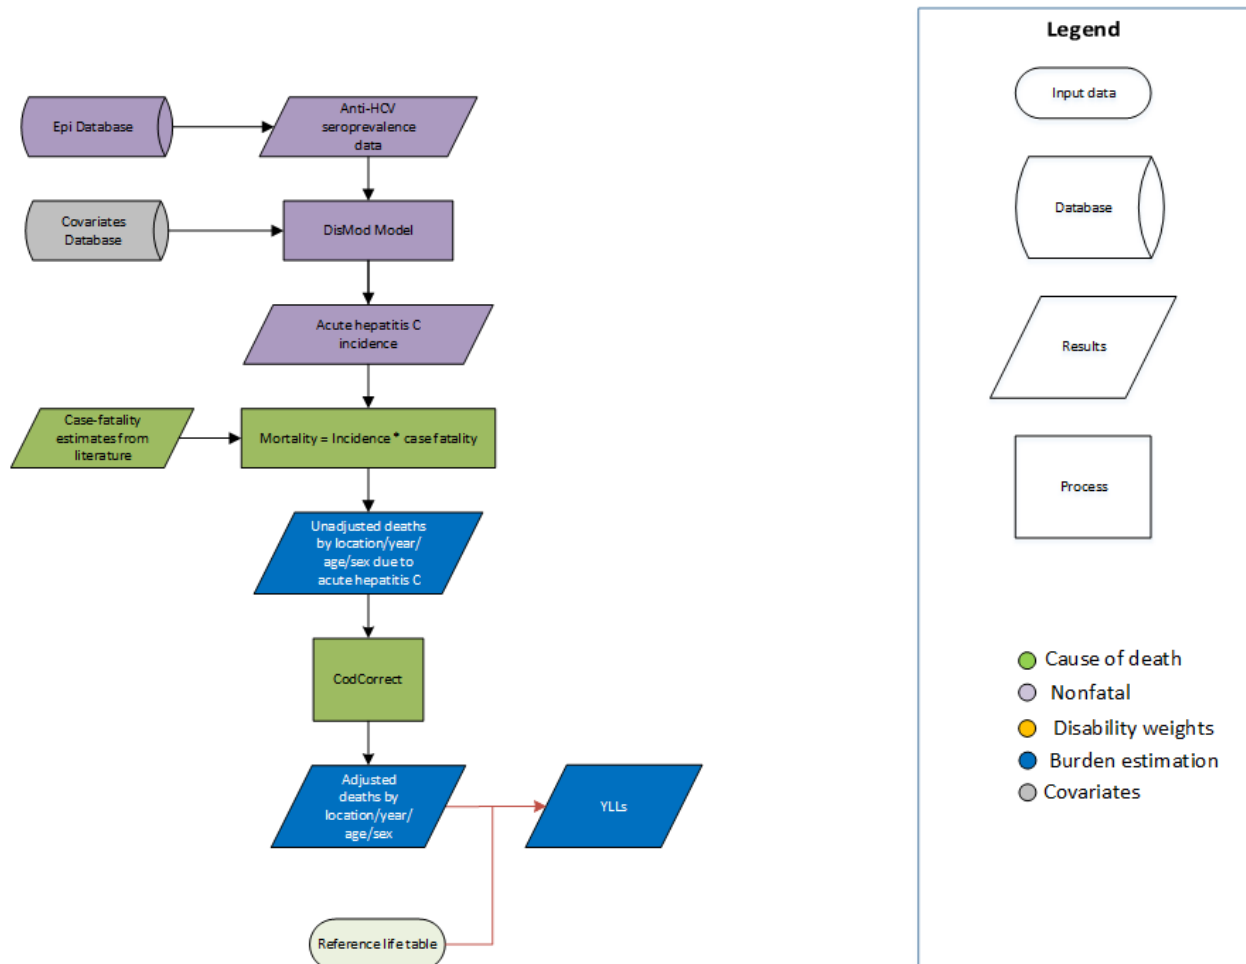

### Input data

We use anti-HCV seroprevalence data from population-based studies and surveys for the incidence model.

### Modeling strategy

Virus-specific CoD data for acute hepatitis are inconsistently reported and of questionable accuracy. We therefore use a two-part modeling strategy for acute hepatitis A, B, C, and E. First, we develop a parent acute hepatitis mortality model using CODEm and all acute hepatitis mortality data within the CoD database. Second, we develop four separate natural history models to estimate deaths from acute hepatitis A, B, C, and E, respectively. Finally, we rescale the virus-specific death estimates from the four natural history models to fit within the envelope defined by the parent acute hepatitis CoD model.

We model the incidence of hepatitis C using a full DisMod model of anti-HCV seroprevalence and estimate acute hepatitis C deaths as the product of these incidence estimates and published estimates of acute hepatitis C case fatality.

We have made no substantive changes in the modeling strategy from GBD 2013.

## Acute hepatitis E

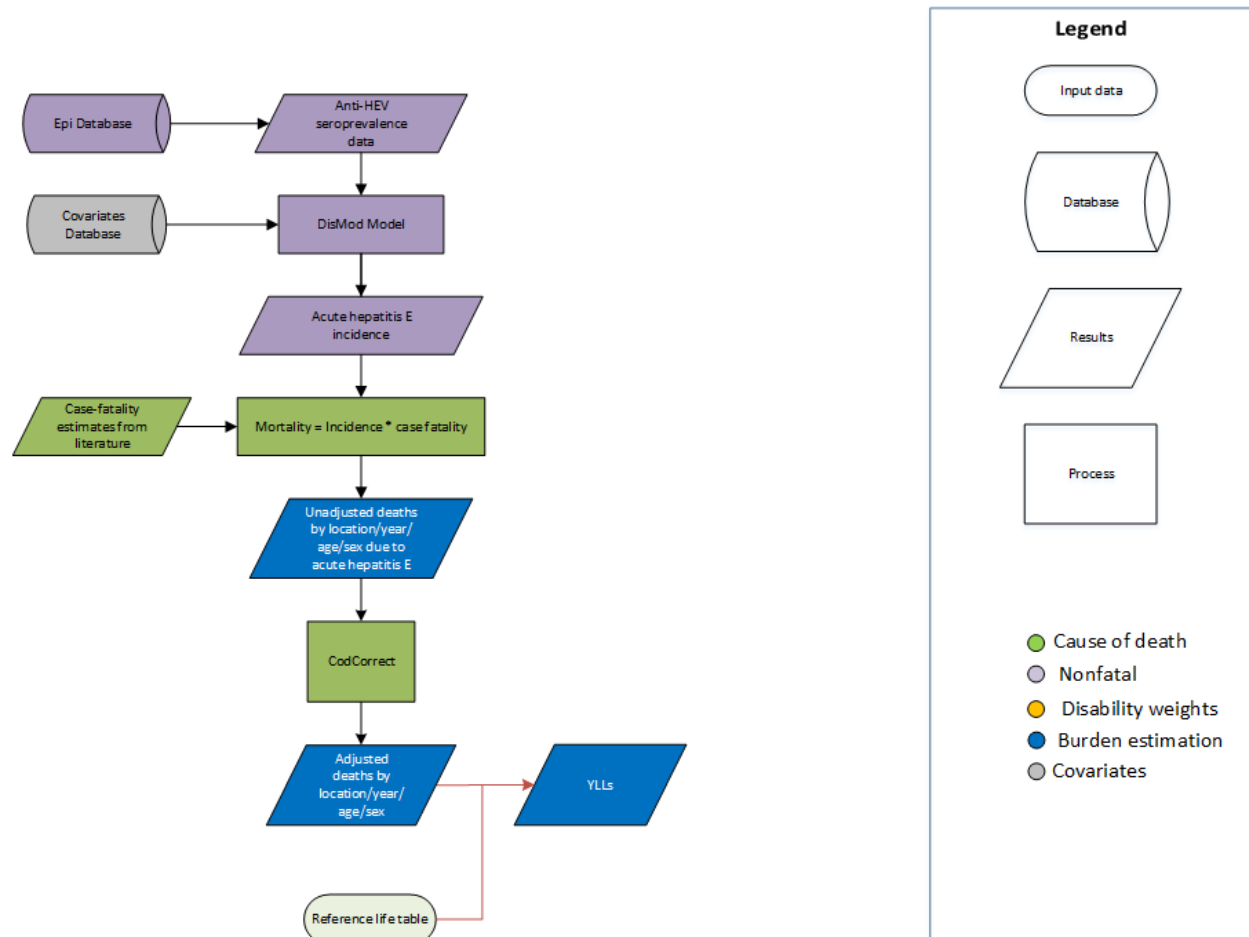

### Input data

We use anti-HEV seroprevalence data from population-based studies and surveys for the incidence model.

### Modeling strategy

Virus-specific CoD data for acute hepatitis are inconsistently reported and of questionable accuracy. We therefore use a two-part modeling strategy for acute hepatitis A, B, C, and E. First, we develop a parent acute hepatitis mortality model using CODEm and all acute hepatitis mortality data within the CoD database. Second, we develop four separate natural history models to estimate deaths from acute hepatitis A, B, C, and E, respectively. Finally, we rescale the virus-specific death estimates from the four natural history models to fit within the envelope defined by the parent acute hepatitis CoD model.

We model the incidence of hepatitis E using a full DisMod model of anti-HEV seroprevalence and estimate acute hepatitis E deaths as the product of these incidence estimates and published estimates

of acute hepatitis E case fatality, accounting for the proportion of infections that occur in pregnant women and the higher case fatality of hepatitis E among pregnant women. Since HEV genotypes tend to be less pathogenic and less virulent, we restrict hepatitis E deaths to countries in regions where genotypes 1 and 2 predominate (i.e., Central Asia, Central sub-Saharan Africa, East Asia, Eastern sub-Saharan Africa, North Africa and Middle East, Oceania, South Asia, Southeast Asia, Southern sub-Saharan Africa, and Western sub-Saharan Africa).<sup>1</sup>

We have made no substantive changes in the modeling strategy from GBD 2013.

## Reference

1 Rein DB, Stevens GA, Theaker J, Wittenborn JS, Wiersma ST. The global burden of hepatitis E virus genotypes 1 and 2 in 2005. *Hepatology* 2012; **55**: 988–97.

## 2.5 Prevalence-based models

The modeling strategies for Alzheimer's and other dementias and atrial fibrillation are distinct from those used for other causes modeled as natural history models. These models use prevalence estimates and excess mortality rates (EMR) generated through DisMoD MR2.1, rather than incidence and case-fatality rates.



## Alzheimer Disease and Other Dementias

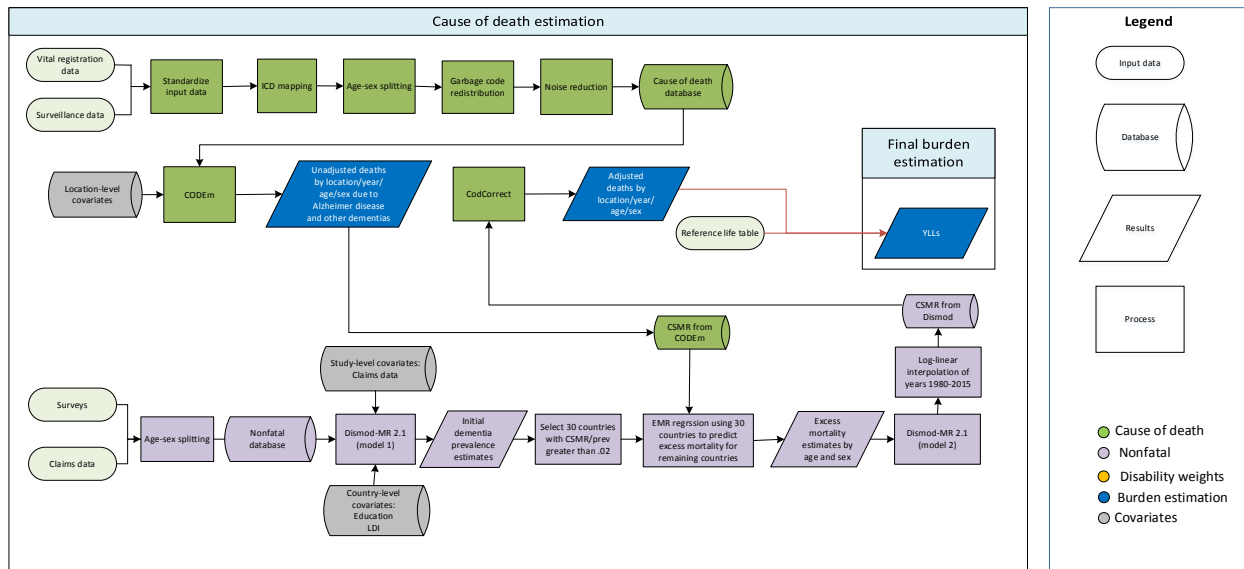

### Input Data

In GBD 2015, data used to estimate deaths due to Alzheimer disease and other dementias (dementias hereafter) included mortality data from vital registration systems and prevalence data from surveys and claims sources.

An updated systematic review was conducted from January 2013 to October 2015, and search terms<sup>1</sup> were set to capture studies for all dementia, including its sub-types. The search yielded 1,399 initial hits and 27 were marked for extraction. Inclusion criteria comprised studies that reported prevalence, incidence, remission rate, excess mortality rate, relative risk of mortality, standardized mortality ratio, or with-condition mortality rate. Studies with no clearly defined sample were excluded.

### Modeling Strategy

#### Overview

Dementia mortality rates have increased more than five-fold since 1980 in high-quality vital registration systems such as in the US and Scandinavia. We have not seen an equivalent increase in prevalence and incidence data sources. If at all, there has been a modest decline in incidence and prevalence of dementia in studies in the UK and the US that used comparable survey methods. Also, the greater than 20-fold variation in mortality rates of dementia between countries is much greater the four-fold difference in prevalence and incidence between countries. As it is unlikely that case fatality from dementia has dramatically increased over the time period and that it would differ by a very large margin between countries, the hypothesis is that certifying and coding practices have changed over time and at a different pace between countries. To avoid spurious large trends over time in the fatal component of the burden of dementia, we decided for GBD 2013 to make dementia mortality rates consistent with the rates observed in 2015 relative to prevalence of countries that are most likely to certify or code

<sup>1</sup> ((dementia[Title/Abstract]) AND ((incidence[Title/Abstract]) or (prevalence[Title/Abstract])) AND ('2013'[Date - Publication] : '2015'[Date - Publication]))

dementia as an underlying cause of death. This approach was applied for GBD 2015, described further below.

#### Modeling steps

First, we ran a CODEm model for dementia and extracted the mortality rates by age, sex, and geography for 2015.

Second, we ran a DisMod-MR 2.1 model with all data on incidence, prevalence, and mortality risk (RR, SMR, or with-condition mortality rates) and a setting of zero remission and extracted 2015 prevalence by age, sex, and geography. The most substantial new source used for GBD 2015 was medical claims data, which provided data by age and sex for years 2000, 2010, and 2012 across all US states. To account for potential systematic differences between claims and survey data, we crosswalked for each year of claims data.

Third, we selected 30 countries with a cause-specific mortality rate to prevalence ratio greater than 0.02 (excluding small island nations and those without vital registration).

Fourth, we used a mixed effects regression with dummies on age group and sex to predict excess mortality (i.e., the ratio of cause-specific mortality rate and prevalence) by age and sex, the results of which are found in the Table below.

**Table: Fixed effect coefficients of EMR regression. Outcome:  $\ln(\text{EMR})$**

| Independent variables    | Coef   | Std. error | P value | 95% Confidence Interval |        |
|--------------------------|--------|------------|---------|-------------------------|--------|
|                          |        |            |         |                         |        |
| Female                   | -0.235 | 0.020      | 0.000   | -0.274                  | -0.196 |
| Age 60-64                | 0.707  | 0.034      | 0.000   | 0.640                   | 0.774  |
| Age 65-69                | 0.817  | 0.034      | 0.000   | 0.750                   | 0.884  |
| Age 70-74                | 1.120  | 0.034      | 0.000   | 1.053                   | 1.188  |
| Age 75- 80               | 1.471  | 0.034      | 0.000   | 1.404                   | 1.539  |
| Age 80+                  | 2.198  | 0.034      | 0.000   | 2.131                   | 2.266  |
| Constant                 | -4.978 | 0.074      | 0.000   | -5.122                  | -4.834 |
| Random effect parameters |        |            |         |                         |        |
| Variance(constant)       | 0.143  | 0.038      |         | 0.085                   | 0.240  |
| Variance(residual)       | 0.034  | 0.003      |         | 0.029                   | 0.040  |

We also fit a variation of the main EMR regression including the natural log of lagged distributed income ( $\ln \text{ldi}$ ) as an additional covariate. The coefficient estimate and the corresponding confidence interval were then used to set a prior on the relationship between  $\ln \text{ldi}$  and EMR in DisMod-MR 2.1, where  $\ln \text{ldi}$  was a country-level covariate. This helped to capture location-specific variation in EMR for locations not included in the regression.

Fifth, these estimates were added to a second DisMod-MR 2.1 model as pertaining to the full 1990–2015 estimation period. For the 30 countries included in the regression, we retained their age- and sex-specific ratios and entered those also as pertaining to the full 1990–2015 estimation period.

Sixth, we took the predictions of cause-specific mortality by age, sex, geography, and year that DisMod-MR 2.1 calculated as being consistent with the data on incidence, prevalence, and the priors on excess mortality from step five. As mentioned, log lag distributed income per capita was used as a country-level covariate on EMR. The prior bounds of this latter selection were calculated using an iteration of the main EMR regression with log LDI as an additional covariate. We excluded data for standardized mortality ratio, with-condition mortality rate, relative risk as we wanted to estimate cause-specific mortality rates that were consistent with the level of excess mortality from the 30 chosen countries in 2015.

Seventh, because DisMod-MR 2.1 only produces estimates in five-year intervals from 1990 to 2015, we expanded the time series by log-linear interpolation. The trend from 1990–1995 was used to back-cast values for the 1980–1990 time period.

## Atrial Fibrillation and Flutter

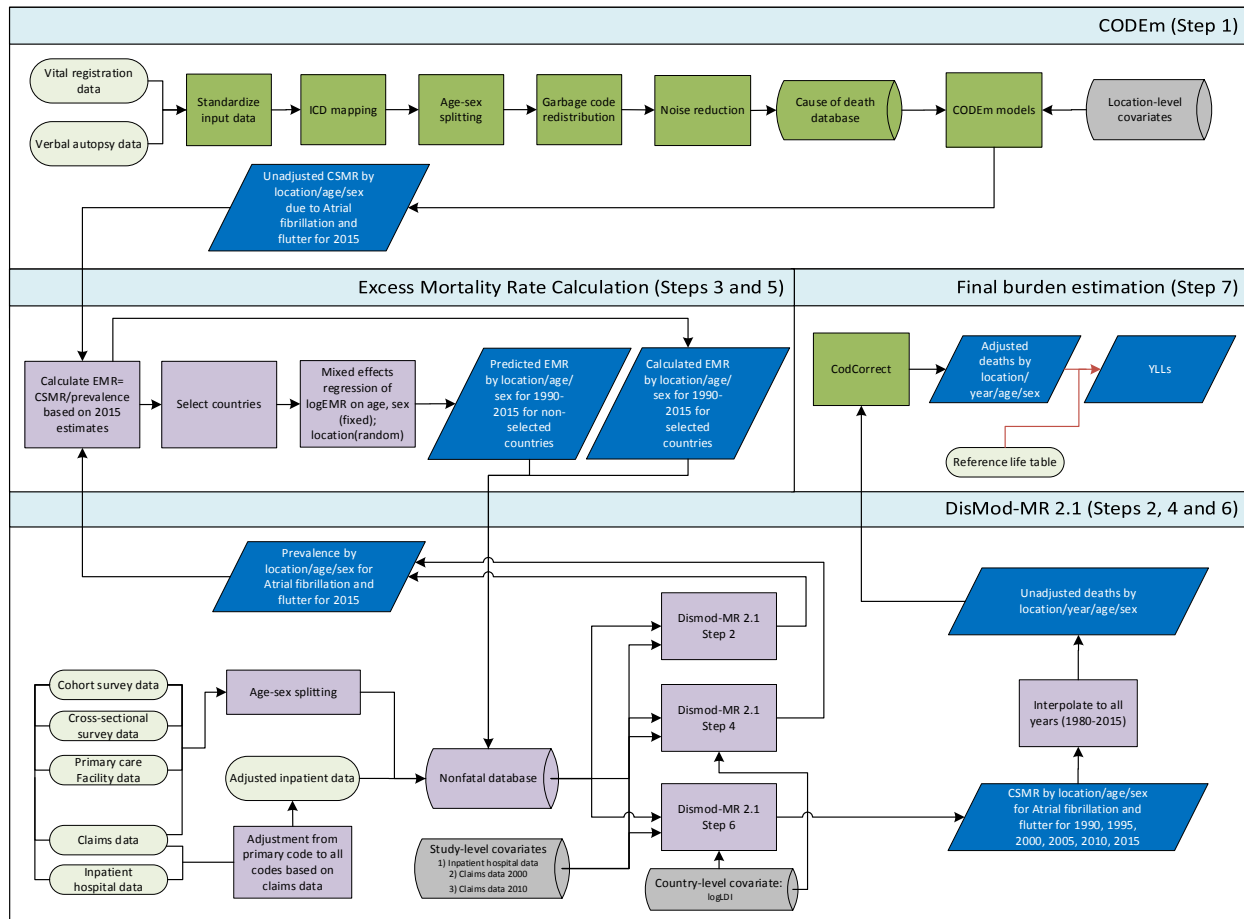

### Input data

**Vital Registration Data:** We outliered ICD8 and ICD9 data points that were discontinuous from other data in the time series and created an unlikely time trend. We also outliered data points that were implausibly low in multiple age groups.

### Modeling strategy

In order to address changes in coding practices for atrial fibrillation, we used an integrated approach that combined DisMod-MR and CODEm models to estimate deaths from atrial fibrillation and flutter. This approach allowed us to adjust estimates to more accurately reflect the number of deaths for which atrial fibrillation was the true underlying cause of death.

The modeling steps are illustrated in the above flowchart. In Step 1, we estimated deaths for atrial fibrillation using a standard CODEm approach. In Step 2, we estimated prevalence rates in DisMod-MR using data from published reports of cross-sectional and cohort surveys and primary care facility data. We also used claims data covering inpatient and outpatient visits for the United States along with inpatient hospital data from 22 countries. As the inpatient hospital data only included information from the primary code for each visit, prevalence rates for these data were adjusted based on the age- and

sex-specific proportions of atrial fibrillation in the primary codes vs. secondary codes in the US claims data. In Step 3, we calculated the excess mortality rate (EMR) for 2015 (defined as the cause-specific mortality rate (CSMR) estimated from CODEm divided by the prevalence rate from DisMod-MR). We then selected 27 countries based on four conditions: 1) availability of VR data; 2) prevalence rate  $\geq 0.005$ ; 3) CSMR  $\geq 0.00002$ ; and, 4) EMR  $\geq 0.001$ . Using information from these countries as input data, we ran a linear mixed-effects regression of logEMR on sex, age, and location. Sex and age were treated as fixed effects for the regression, while location was considered a random effect. We then predicted age- and sex-specific EMR using the results of this regression for all non-selected countries. Countries included in the regression were assigned their directly calculated values. These EMR data points were assigned to the time period 1990–2015 and uploaded into the nonfatal database in order to be used in modeling. In Step 4, we reran DisMod-MR including the EMR estimated in Step 3 and using log-transformed lagged distributed income (LDI) as a country-level covariate. Based on information from other regressions, we set the bounds at -1.5 to -0.25.

In Steps 5 and 6, we repeated the process in Steps 3 and 4. In this iteration, we selected 31 countries that were included in the mixed-effects regression. The criteria were: 1) availability of VR data; 2) prevalence rate  $\geq 0.004$ ; 3) CSMR  $\geq 0.00002$ ; and, 4) EMR  $\geq 0.002$ . The CSMR from the DisMod-MR model in Step 6 was used as the finalized output. As DisMod-MR only generates estimates for six years (1990, 1995, 2000, 2005, 2010, 2015), we interpolated the missing years to generate death estimates for all years (1980–2015). These results were then uploaded into the Cause of Death database. Finally, in Step 7, the unadjusted death estimates were run through the CodCorrect process to generate adjusted deaths and YLLs were generated by the DALYnator using a standard reference life table.

## 2.6 Sub-cause proportion models

For several causes for which death is rare, we first modelled the parent cause in the GBD hierarchy with CODEm and then allocated deaths to specific causes using proportions of the parent cause for each age-sex-geography-year for each sub-cause. For these causes, we identified no significant predictors in negative binomial regressions. This approach was taken because the available data on these specific causes may come from sources other than VR, such as end-stage renal disease registries, or come from too few places to model the death rates directly. Details for each cluster of causes analyzed in this way are below.

# Meningitis

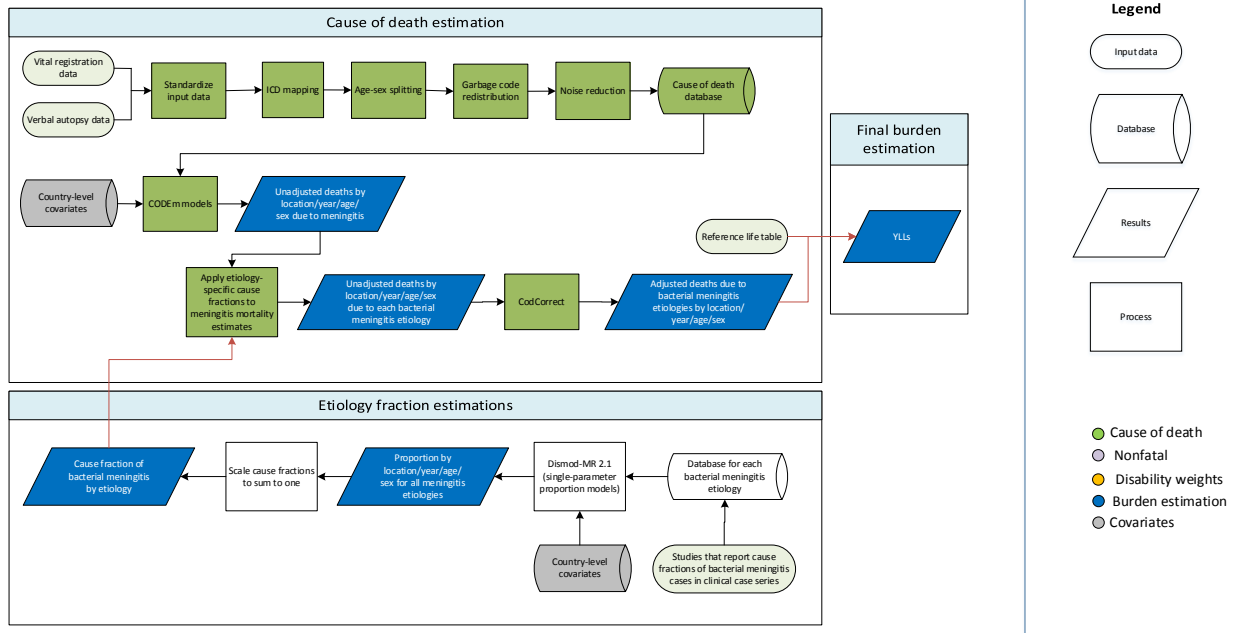

## Input data

Input data for the all-meningitis model came from the cause of death database which includes vital registration and verbal autopsy data. We outliered data in instances where garbage code redistribution and noise reduction, in combination with small sample sizes, resulted in unreasonable cause fractions when compared to regional, super-regional, and global rates, and data that violated well-established time or age trends. Outliering methods were consistent across both vital registration and verbal autopsy data.

Input data that informed the etiology splits came from a systematic review. In the GBD 2010 study, we conducted a systematic review of literature to capture studies of incidence for all four etiologies of bacterial meningitis (meningococcal, pneumococcal, H influenza type B, and other bacterial meningitis). It was assumed that viral meningitis does not lead to mortality, therefore only deaths due to bacterial meningitis were considered. The inclusion criteria of the systematic review stipulated that: (1) the publication year must be between 1980 and 2010; (2) “caseness” was based on diagnoses by antigen test, blood test, cerebrospinal fluid test, polymerase chain reaction test, or latex agglutination test; (3) sufficient information must be provided on study method and sample characteristics to assess the quality of the study; and (4) study samples must be representative of the general population. No limitation was set on the language of publication. For GBD 2013, the search strategy was replicated to capture epidemiological studies published between 2010 and 2013. This was repeated for GBD 2015 for studies published between 2013 and 2015, but only excess mortality was extracted. There were no bias corrections such as crosswalks or study-level covariates for the input data used for the etiology splits.

## Modeling strategy

We modeled deaths due to all bacterial meningitis with two CODEm models, separately for each sex and two age categories – under 5 and 5 years and above – because the mortality trends differ substantially between children and adults, and there are a significant number of data sources that only have data for under-5-year-olds. The two models used the same covariates and otherwise standard CODEm parameters. The final sex-specific models for deaths due to all bacterial meningitis were a hybridized model of separate global and data rich models.

To obtain estimates for each of the four etiologies of bacterial meningitis – meningococcal, pneumococcal, H influenza type B, and other bacterial – we ran four single-parameter proportion models using DisMod-MR 2.1. The meningococcal meningitis proportion model used two country-level covariates to inform the model – proportion of the population living within the meningitis belt, and proportion of the population covered by the meningococcal meningitis type A vaccine (an initiative called Menafrivac). The pneumococcal meningitis model was informed by PCV3 coverage, and the H influenza type B meningitis model was informed by HIB3 coverage. The other bacterial meningitis proportion model did not use any country-level covariates. Since DisMod-MR 2.1 estimates in 5-year intervals, the etiological proportions for years between the intervals were interpolated at the draw level. Additionally, DisMod-MR 2.1 only produces estimates beginning in 1990, while cause of death estimates begin in 1980. Values at the draw level from 1990 were used for the years 1980–1989. The four proportion models were forced to sum to 1 at the draw level for each location, year, sex, and age combination. We applied these proportions to the all bacterial meningitis cause of death models to produce estimates for each of the four etiologies assuming that the etiological proportions derived from incidence studies apply equally to deaths.



## Maternal disorders

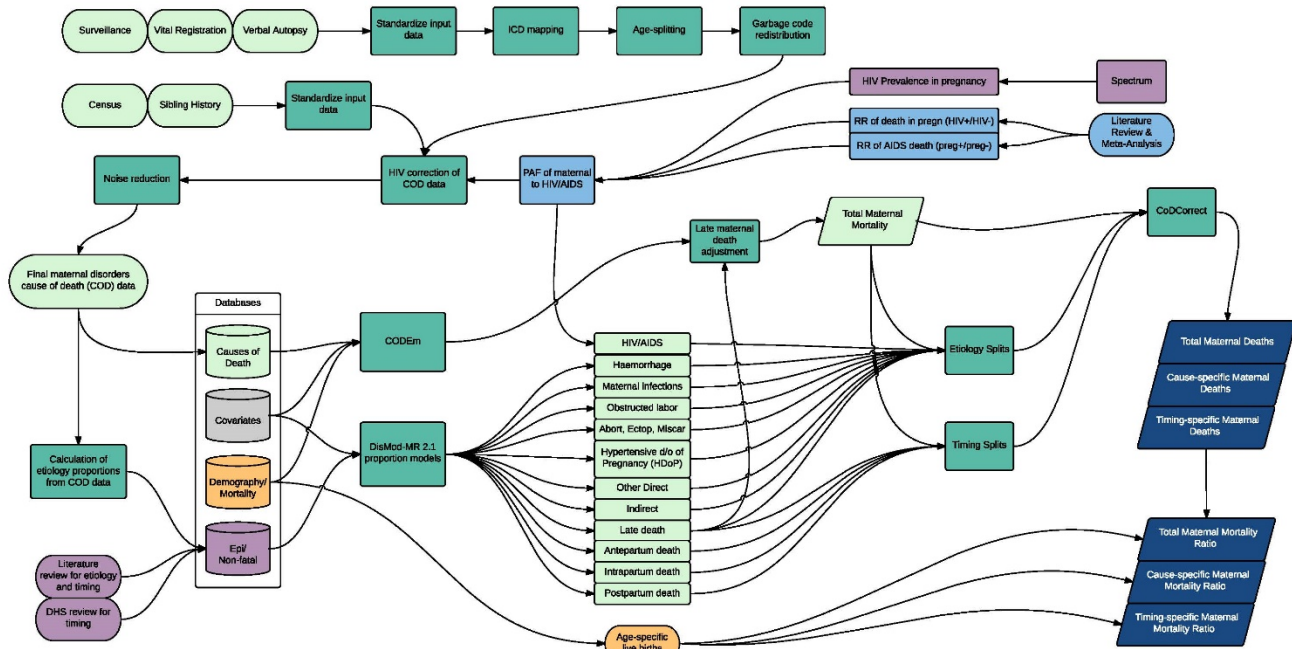

### Input data

CODEm models were informed by centrally prepped data stored in the cause of death (COD) database. All data were corrected for incidental HIV deaths. Spectrum outputs of HIV prevalence in pregnancy were combined with relative risk of mortality during pregnancy (HIV+ vs. HIV-negative) to calculate PAFs. A proportion of these deaths are incidental and a proportion are maternal. PAFs were applied to all sibling history and census data to remove incidental HIV deaths. An updated literature review to inform the relative risk of mortality in pregnancy in HIV-positive versus HIV-negative women produced 14 leads but no usable sources. We completed this search on May 7, 2015, using the following two search strings:

```
("HIV"[Mesh] OR "Acquired Immunodeficiency Syndrome"[Mesh]) AND ("Pregnancy"[Mesh] OR "Postpartum Period"[Mesh]) AND "Mortality"[Mesh]
```

```
"HIV"(MeSH) AND ("pregnant"(Title/Abstract) OR "pregnancy"(Title/Abstract) OR "postpartum"(Title/Abstract) OR "post partum"(Title/Abstract)) AND ("mortality"(Title/Abstract) OR "death"(Title/Abstract))"
```

All data from all geographies were reviewed in CODEm models. Outliers were identified as those data where age patterns or temporal patterns were inconsistent with neighboring age groups or locations or where sparse data were predicting implausible overall temporal or age patterns for a given location.

DisMod-MR 2.1 etiology proportion models were informed by two sources of data. First, we completed a systematic literature review on May 7, 2015, using two different search strings:

**To inform etiology and timing models:** ("maternal mortality"[Title/Abstract] OR "maternal death"[Title/Abstract] OR "MM"[Title/Abstract] OR "confidential enquiry"[Title/Abstract] OR ((obstetric[Title/Abstract] OR pregnancy[Title/Abstract]) AND (etiology[Title/Abstract] OR "cause pattern"[Title/Abstract]) AND (death[Title/Abstract] OR mortality[Title/Abstract])) AND ("2013"[PDAT] : "2015"[PDAT])) AND "humans"[MeSH Terms] NOT (fetal[Title/Abstract] OR newborns[Title/Abstract] OR newborn[Title/Abstract] OR neonatal[Title/Abstract] OR "case report"[Title/Abstract] OR "case study"[Title/Abstract] OR pathogenesis[Title/Abstract] OR thromboprophylaxis[Title/Abstract])

**To identify all sources on country-specific maternal mortality:** ("maternal mortality"[Title/Abstract] OR "maternal death"[Title/Abstract] OR "MMR"[Title/Abstract]) AND ("Afghanistan"[Title/Abstract] OR "Albania"[Title/Abstract] OR "Algeria"[Title/Abstract] OR "Andorra"[Title/Abstract] OR "Angola"[Title/Abstract] OR "Antigua and Barbuda"[Title/Abstract] OR "Argentina"[Title/Abstract] OR "Armenia"[Title/Abstract] OR "Azerbaijan"[Title/Abstract] OR "Bahrain"[Title/Abstract] OR "Bangladesh"[Title/Abstract] OR "Barbados"[Title/Abstract] OR "Belarus"[Title/Abstract] OR "Belize"[Title/Abstract] OR "Benin"[Title/Abstract] OR "Bhutan"[Title/Abstract] OR "Bolivia"[Title/Abstract] OR "Bosnia and Herzegovina"[Title/Abstract] OR "Botswana"[Title/Abstract] OR "Brazil"[Title/Abstract] OR "Brunei"[Title/Abstract] OR "Bulgaria"[Title/Abstract] OR "Burkina Faso"[Title/Abstract] OR "Burundi"[Title/Abstract] OR "Cambodia"[Title/Abstract] OR "Cameroon"[Title/Abstract] OR "Cape Verde"[Title/Abstract] OR "Central African Republic"[Title/Abstract] OR "Chad"[Title/Abstract] OR "China"[Title/Abstract] OR "Colombia"[Title/Abstract] OR "Comoros"[Title/Abstract] OR "Congo"[Title/Abstract] OR "Costa Rica"[Title/Abstract] OR "Croatia"[Title/Abstract] OR "Cuba"[Title/Abstract] OR "Cyprus"[Title/Abstract] OR "Côte d'Ivoire"[Title/Abstract] OR "Democratic Republic of the Congo"[Title/Abstract] OR "Djibouti"[Title/Abstract] OR "Dominica"[Title/Abstract] OR "Dominican Republic"[Title/Abstract] OR "Ecuador"[Title/Abstract] OR "Egypt"[Title/Abstract] OR "El Salvador"[Title/Abstract] OR "Equatorial Guinea"[Title/Abstract] OR "Eritrea"[Title/Abstract] OR "Ethiopia"[Title/Abstract] OR "Federated States of Micronesia"[Title/Abstract] OR "Fiji"[Title/Abstract] OR "Gabon"[Title/Abstract] OR "Georgia"[Title/Abstract] OR "Ghana"[Title/Abstract] OR "Grenada"[Title/Abstract] OR "Guatemala"[Title/Abstract] OR "Guinea"[Title/Abstract] OR "Guinea-Bissau"[Title/Abstract] OR "Guyana"[Title/Abstract] OR "Haiti"[Title/Abstract] OR "Honduras"[Title/Abstract] OR "India"[Title/Abstract] OR "Indonesia"[Title/Abstract] OR "Iran"[Title/Abstract] OR "Iraq"[Title/Abstract] OR "Jamaica"[Title/Abstract] OR "Jordan"[Title/Abstract] OR "Kazakhstan"[Title/Abstract] OR "Kenya"[Title/Abstract] OR "Kiribati"[Title/Abstract] OR "Kuwait"[Title/Abstract] OR "Kyrgyzstan"[Title/Abstract] OR "Laos"[Title/Abstract] OR "Latvia"[Title/Abstract] OR "Lebanon"[Title/Abstract] OR "Lesotho"[Title/Abstract] OR "Liberia"[Title/Abstract] OR "Libya"[Title/Abstract] OR "Lithuania"[Title/Abstract] OR "Macedonia"[Title/Abstract] OR "Madagascar"[Title/Abstract] OR "Malawi"[Title/Abstract] OR "Malaysia"[Title/Abstract] OR "Maldives"[Title/Abstract] OR "Mali"[Title/Abstract] OR "Malta"[Title/Abstract] OR "Marshall Islands"[Title/Abstract] OR "Mauritania"[Title/Abstract] OR "Mauritius"[Title/Abstract] OR "Moldova"[Title/Abstract] OR "Mongolia"[Title/Abstract] OR "Montenegro"[Title/Abstract] OR "Morocco"[Title/Abstract] OR "Mozambique"[Title/Abstract] OR "Myanmar"[Title/Abstract] OR "Namibia"[Title/Abstract] OR "Nepal"[Title/Abstract] OR "Nicaragua"[Title/Abstract] OR "Niger"[Title/Abstract] OR "Nigeria"[Title/Abstract] OR "North Korea"[Title/Abstract] OR "Oman"[Title/Abstract] OR "Pakistan"[Title/Abstract] OR "Palestine"[Title/Abstract] OR "Panama"[Title/Abstract] OR "Papua New Guinea"[Title/Abstract] OR "Paraguay"[Title/Abstract] OR "Peru"[Title/Abstract] OR "Philippines"[Title/Abstract] OR "Qatar"[Title/Abstract] OR "Romania"[Title/Abstract] OR "Russia"[Title/Abstract] OR "Rwanda"[Title/Abstract] OR "Saint Lucia"[Title/Abstract] OR "Saint Vincent and the Grenadines"[Title/Abstract] OR "Samoa"[Title/Abstract] OR "Saudi Arabia"[Title/Abstract] OR "Senegal"[Title/Abstract] OR "Serbia"[Title/Abstract] OR "Seychelles"[Title/Abstract] OR "Sierra Leone"[Title/Abstract] OR "Singapore"[Title/Abstract] OR "Solomon Islands"[Title/Abstract] OR "Somalia"[Title/Abstract] OR "South Africa"[Title/Abstract] OR "Sri Lanka"[Title/Abstract] OR

"Sudan"[Title/Abstract] OR "Suriname"[Title/Abstract] OR "Swaziland"[Title/Abstract] OR  
 "Syria"[Title/Abstract] OR "São Tomé and Príncipe"[Title/Abstract] OR "Taiwan"[Title/Abstract] OR  
 "Tajikistan"[Title/Abstract] OR "Tanzania"[Title/Abstract] OR "Thailand"[Title/Abstract] OR "The  
 Bahamas"[Title/Abstract] OR "The Gambia"[Title/Abstract] OR "Timor-Leste"[Title/Abstract] OR  
 "Togo"[Title/Abstract] OR "Tonga"[Title/Abstract] OR "Trinidad and Tobago"[Title/Abstract] OR  
 "Tunisia"[Title/Abstract] OR "Turkmenistan"[Title/Abstract] OR "Uganda"[Title/Abstract] OR  
 "Ukraine"[Title/Abstract] OR "United Arab Emirates"[Title/Abstract] OR "Uruguay"[Title/Abstract] OR  
 "Uzbekistan"[Title/Abstract] OR "Vanuatu"[Title/Abstract] OR "Venezuela"[Title/Abstract] OR  
 "Vietnam"[Title/Abstract] OR "Yemen"[Title/Abstract] OR "Zambia"[Title/Abstract] OR  
 "Zimbabwe"[Title/Abstract]) AND (""2013""[PDAT] : ""2015""[PDAT])) AND ""humans""[MeSH] NOT  
 ("demographic and health survey\*" [Title/Abstract] OR DHS[Title/Abstract] OR "reproductive health  
 survey\*" [Title/Abstract] OR RHS[Title/Abstract])

A total of 893 sources were reviewed for their title and abstract. Of those selected for full text review, 29 had usable data for etiology-specific maternal mortality models. All data were prepped as "proportion" of total maternal deaths due to that cause. Because many sources do not include the entire cause list, a series of study covariates were used to facilitate crosswalking back to the reference definition. The reference definition *includes* "other" direct obstetric complications, indirect maternal deaths, and late maternal death. The second source of data was from the COD database. All etiology-specific COD data were processed to be "proportion" data by calculating the cause-specific deaths divided by the total maternal deaths for the matching data source, year, age, and location. Owing to the large volume of total COD data and small sample sizes in many locations, COD data were collapsed around each of the five-year periods for which DisMod-MR 2.1 makes distinct estimates (1990, 1995, 2000, 2005, 2010, and 2015). Late maternal death data were only included for the subset of locations where they were reliably coded in raw VR. All data were uploaded to the nonfatal database.

### Modeling strategy

Overall maternal mortality was estimated with CODEm. Etiology-specific estimates were derived by multiplying the proportion outputs from DisMod-MR 2.1 by the total maternal deaths for that age-group, location, and year, which were scaled in relation to each other to equal one. HIV-related maternal deaths were estimated for all locations using the PAF approach described above for mortality data processing. Incidental HIV deaths during pregnancy were by definition excluded.

DisMod-MR 2.1 proportion models for each sub-cause of maternal mortality were all single-parameter models. Study covariates included those listed above that were used to crosswalk back to a reference definition where all specific sub-causes of maternal mortality were included in every study. Country covariates were specific for each model and included abortion legality (for abortion, ectopic pregnancy, and miscarriage), log-transformed lag-distributed income (for sepsis and late maternal death), and logit-transformed in-facility delivery proportion (for hemorrhage, hypertensive disorders of pregnancy, and obstructed labor). The time window was set at +/- 2 years for all models except late, which was +/- 5 years. The narrower window ensured that any given year of VR data only informed a single estimate.

## Sexually transmitted infections excluding HIV

This write-up covers includes all sexually transmitted diseases excluding HIV, which was run as a sub-cause proportion model.

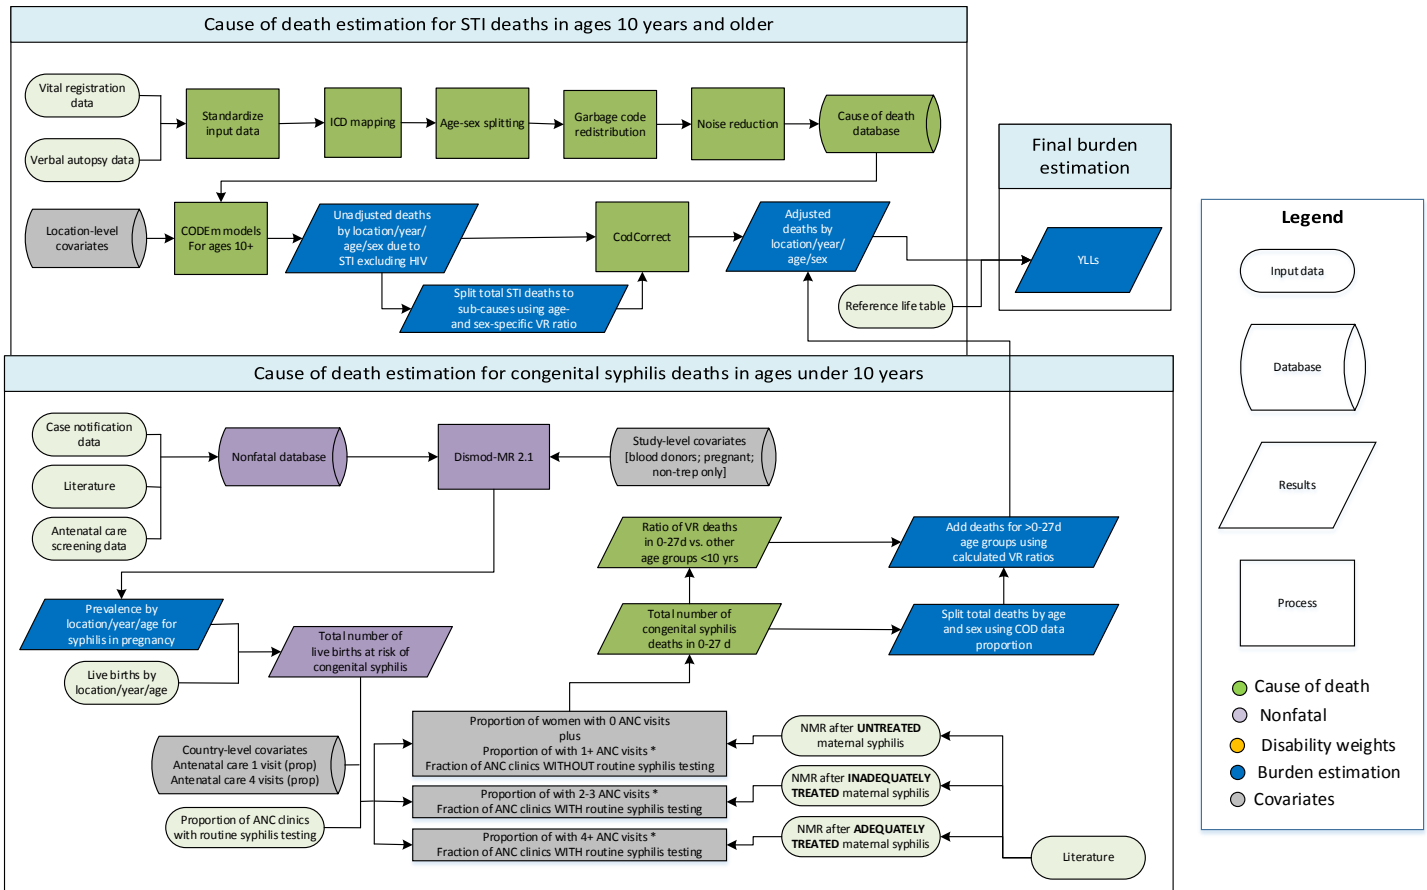

### Input data

CODEm models for males and females 10 years and older were informed from centrally prepped data stored in the cause of death (COD) database. All data from all geographies were reviewed. Outliers were identified as those data where age patterns or temporal patterns were inconsistent with neighboring age groups or locations or where sparse data were predicting implausible overall temporal or age patterns for a given location.

Four different types of data were used for the NHM model. First, we used literature, survey, and report data described below to estimate early syphilis in pregnancy. Second, we used GBD 2015 estimates of antenatal care (ANC) coverage data from our covariates database and live births estimates from our demographics analysis. Third, we used published data from the Global Health Observatory on proportion of ANC clinics that test for syphilis and the proportion of women testing positive who receive treatment. Fourth, we used the results of a systematic literature review completed for GBD 2010 to inform excess mortality of neonates born with syphilis.

We completed data-rich (DR) and global CODEm models for ages 10 years and over for males and females separately. Nine covariates were used in each CODEm model, including 1) syphilis prevalence in pregnancy from DisMod-MR 2.1 analysis described below; 2) coverage of one antenatal care (ANC) visit, 3) coverage of four ANC visits; 4) age-specific fertility rate; 5) total fertility rate; 6) health system access, a principal components analysis of ANC, in-facility delivery, skilled birth attendance, and vaccine coverage; 7) national income per capita (LDI); 8) years of education per capita; and 9) abortion legality, a categorical variable that ranges from 1 (always illegal) to 7 (always legal on demand).

The overall CODEm model for STI was split into the sub-causes using vital registration (VR) data from the COD database. Trichomoniasis and HSV-2 are assumed not to cause mortality. Chlamydia is further assumed not to cause death in males. Cause-specific mortality rate VR data for each age-group, sex, and year were summed and scaled to match the total STI cause-specific mortality rate predicted by CODEm. This VR pattern was applied globally to all locations.

Our NHM for congenital syphilis began with estimation of early syphilis prevalence in all age-groups, both sexes, all GBD locations, and in each year from 1990 to 2015. Systematic literature review was combined with review of all publicly available UN GASS country progress reports, antenatal clinic surveillance data from country-specific and UNAIDS reports, targeted searches of national ministry of health (MoH) websites, and other published data provided by GBD collaborators. A Pubmed search was completed on June 1, 2015, using the following search string:

```
("syphilis"[MeSH] OR "Treponema pallidum"[MeSH]) NOT "Yaws"[MeSH] AND  
("prevalence"[MeSH] OR "incidence"[MeSH]) AND "1990"[PDAT] : "2015"[PDAT] AND  
"humans"[MeSH]
```

A total of 1,265 titles and abstracts were found, of which 178 had suitable data for inclusion in our dataset. In addition to standard demographic identifiers, all data were extracted to include number of cases, prevalence or incidence rate, and sample size. Laboratory testing modality for each study was specified as including treponemal test, non-treponemal test, both treponemal and non-treponemal, or direct spirochete detection (e.g., darkfield microscopy). Usage of treponemal and non-treponemal testing was the reference category. Our final dataset included data from 113 distinct geographies. Data from blood donor and pregnant populations were included, but all other high-risk groups were excluded.

### **Modeling strategy**

We modeled early syphilis in DisMod-MR 2.1, restricting incidence before the age of 10 and after the age of 65 and assuming excess mortality from early syphilis is very low ( $\leq 1$  death per 10,000 person-years). Study-level covariates identified data in non-reference categories (pregnant, blood donors) and using non-reference testing modalities (e.g., treponemal test only, non-treponemal test only) and were crosswalked to the reference category within the DisMod-MR 2.1 cascade, predicting specific conversion values for each country. The latter specification of country-level crosswalks was chosen because the bias between non-reference populations and testing modalities was assumed to differ by geography and as a function of, for example, endemicity of acute infectious agents like malaria.

Age-specific prevalence results were paired with age-specific live birth results to generate total number of births at risk of congenital syphilis. To estimate the actual number of congenital syphilis births, we combined information on ANC coverage from GBD 2015 covariates analyses with ANC syphilis testing

and treatment data from GHO. Adequate treatment was assumed to confer no risk of congenital syphilis mortality. Those with four ANC visits or 1-3 ANC visits with testing and treatment were assumed to have received adequate treatment. Inadequate treatment occurred in those women with 1-3 ANC visits without either testing or treatment or those women with one ANC visit but with testing and treatment. Those women with only one or fewer ANC visits and no syphilis testing or treatment were assumed to be untreated. Untreated and inadequate treatment proportions were combined with potential congenital syphilis births to estimate total neonatal syphilis births. Each categorical risk category was combined with corresponding neonatal excess mortality rates derived in GBD 2010. This total number of neonatal syphilis deaths was then split between 0-6 days and 7-27 days age groups using sex and age-specific VR data from the COD database. Congenital syphilis deaths beyond the neonatal period were likewise estimated using sex- and age-specific VR data. This VR pattern was applied globally to all locations.

The primary limitation of our estimation of STI deaths in those over 10 years old is data availability, especially from countries where VR systems are not available. Even in countries with VR, there may be some variation in practices for coding deaths to STI as the underlying cause, especially given the potentially variable presentation of many of the conditions in this category. Such variation is more likely to lead to underestimation of STI deaths than overestimation. Sub-cause estimation is similarly limited by data availability in those locations without VR data, and our estimates are thus based on the overall pattern of deaths in generally higher-income geographies. The primary implication of this limitation is that it decreases the resolution with which we can decompose the relationship between mortality from HIV and other STI. Our NHM for congenital syphilis was a significant improvement over GBD 2013 but still is limited by data availability issues, especially on the coverage and effectiveness of ANC interventions to prevent congenital syphilis. We do not have information on the proportion of women that tested positive who may have received treatment elsewhere, or information on the coverage of treatment for neonates, infants, and children born with congenital syphilis. Both limitations could potentially have led to lower estimates of congenital syphilis deaths. On the other hand, our DisMod-MR 2.1 analysis suggested that pregnant women may in fact have higher syphilis prevalence than the general population, which would have led to higher estimates. We have also not quantified the number of stillbirths associated with congenital syphilis. We will continue to work to address these shortcomings more thoroughly in future GBD analyses.

## Liver cancer

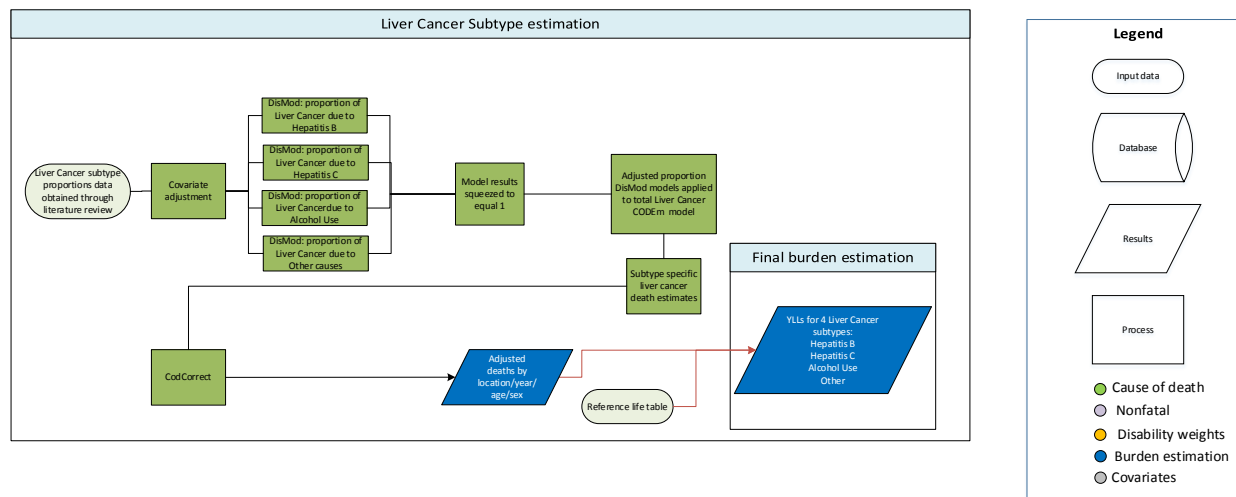

## Input data

### Data seeking processes

The input data for the parent cause (liver cancer) were identified and processed using the same methods as all other cancers described above. To estimate the number of liver cancers for each of these sub-causes, DisMod-MR 2.1 was used to model the proportion of liver cancers due to the four subgroups. All publications used in GBD 2013 were included, and sources were supplemented with a systematic review of the published literature on the etiology of liver cancer. The literature search was performed in Pubmed on 8/13/15 with the following search string: (("Carcinoma, Hepatocellular"[Mesh] AND "etiology"[Subheading] AND ("epidemiology"[Subheading] OR "epidemiology"[All Fields] OR "epidemiology"[MeSH Terms])) AND ("Hepatitis B"[Mesh] OR "Hepatitis C"[Mesh] OR ("ethanol"[MeSH Terms] OR "ethanol"[All Fields] OR "alcohol"[All Fields] OR "alcohols"[MeSH Terms] OR "alcohols"[All Fields]) OR autoimmune[All Fields])). The duration was restricted to articles published between 2013 and 2015. 385 articles were found, of which eight studies were added for liver cancer due to alcohol use (49 studies included from GBD 2013), 11 studies were added for liver cancer due to hepatitis B and C (99 studies included for GBD 2013), and 7 studies were added for liver cancer due to other causes (25 studies included for GBD 2013).

### Inclusion and exclusion criteria

Articles were included if it was possible to identify at least one of the causes (alcohol, hepatitis B, hepatitis C, or "other causes") as the only etiology.

### Bias of categories of input data

The potential biases of the input data are the same as for other cancers (see above).

## Modeling strategy

### Overall methodological process

The modeling strategy for the parent cause “liver cancer” followed the general CODEm process. To estimate the fraction of liver cancer due to each etiology for each age-sex-geography-year DisMod-MR 2.1 was used.

### Steps of analysis and data transformation processes

If the etiology was reported to be due to multiple causes, the cases due to multiple causes were split based on the proportion of cases in the individual etiologies reported in the publication. If cases were reported to be due to cryptogenic causes, these cases were removed from the denominator. A study covariate was used for publications that only assessed liver cancer in a cirrhotic population. The reference or “gold standard” that was used for crosswalking was the compilation of all studies that assessed the etiology of liver cancer in a general population. Smoothness ( $\xi$ ) was set at 0.1 to 0.3, heterogeneity ( $\zeta$ ) was set at 0.5 to 1. Time window for fit was 10 years, minimum coefficient of variation for global, super-region, region, and country was 0.4, 0.2, 0.1, and 0.1.

For liver cancer due to hepatitis C and hepatitis B, a prior value of 0 was set between age 0 and 0.01. For liver cancer due to alcohol a prior value of 0 was set for ages 0 to 5 years and a prior maximum value of 0.8 for ages older than 5.

For liver cancer due to hepatitis C, hepatitis C prevalence was used as a covariate with a predefined minimum of 0 and maximum of 10. Alcohol and hepatitis B prevalence were used as covariates with a pre-specified covariate of -1 to 0. A positive prior was set on the slope from age 0 to age 60.

For liver cancer due to hepatitis B, hepatitis B prevalence was used as a covariate with a predefined minimum of 0 and maximum of 10. Alcohol and hepatitis C prevalence were used as covariates with a pre-specified covariate of -1 to 0.

For liver cancer due to alcohol, alcohol (liters per capita) was used as a covariate with a predefined minimum of 0 and maximum of 10. Hepatitis B prevalence and hepatitis C prevalence were used as covariates with a pre-specified covariate of -1 to 0. A negative prior was set on the slope from age 0 to age 70.

For liver cancer due to other causes, hepatitis C prevalence, alcohol, and hepatitis B prevalence were used as covariates with a pre-specified covariate of -1 to 0.

To ensure coherent results between the cirrhosis and the liver cancer etiologies, the results from the liver cancer etiology models were transformed into covariates that were then used in the cirrhosis etiology models. The results from the cirrhosis etiology models were then used in the liver cancer proportion models.

The DisMod proportions for the underlying liver cancer etiologies were then squeezed to 100% and these final proportions were applied to the parent cause, “liver cancer,” to derive the estimates for the liver cancer etiologies.



Uncertainty intervals

Uncertainty was determined using standard DisMod methodology.

## Results

Interpretation of results

Results for the liver cancer subtype mortality can differ from GBD 2013 for multiple reasons. First, additional sources were added based on an updated literature review. Second, to ensure consistency between cirrhosis and liver cancer etiologies the results from each model for cirrhosis and for liver cancer subtypes were converted into covariates and used in the respective other model. Third, DisMod methods were updated for GBD 2015 (Section 3).

Limitations

The etiological proportion models for the liver cancer sub-causes depend on the availability of data sources that inform DisMod about the local patterns of liver cancer etiologies as well as age patterns. Unfortunately, not many data sources provide data on the etiology of liver cancer by sex or by different age groups. Age patterns were therefore determined based on the assumption that there are no cases of liver cancer due to hepatitis B, hepatitis C, or alcohol in young age groups.

# Cirrhosis

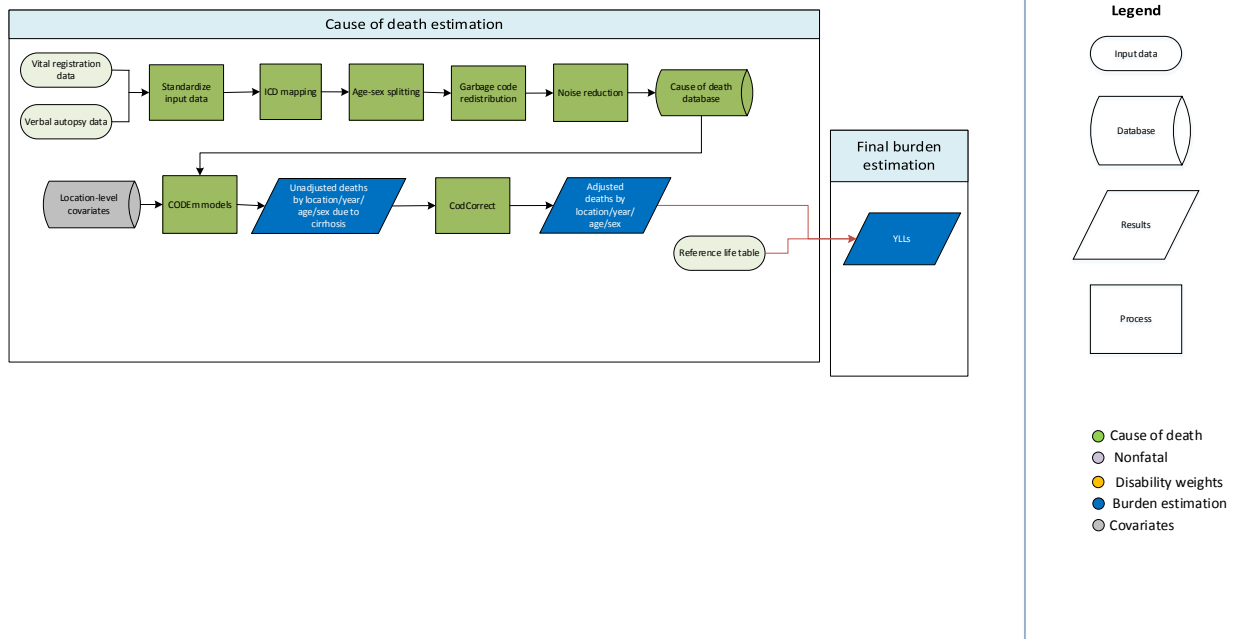

## Input data

We modeled cirrhosis mortality using all available data in the cause of death database. Data points were outliered if they reported an improbable number of deaths or if their inclusion in the model yielded distorted trends.

## Modeling strategy

We modeled cirrhosis mortality using a two-model hybrid approach: 1) a global CODEm model of all locations, using all data in the CoD database; and 2) a CODEm model restricted to data-rich countries.

Since GBD 2013 we have switched from a single global model to the hybrid global/data-rich model approach. We have otherwise made no substantive changes in the modeling strategy for cirrhosis from GBD 2013.

## Cirrhosis by etiology

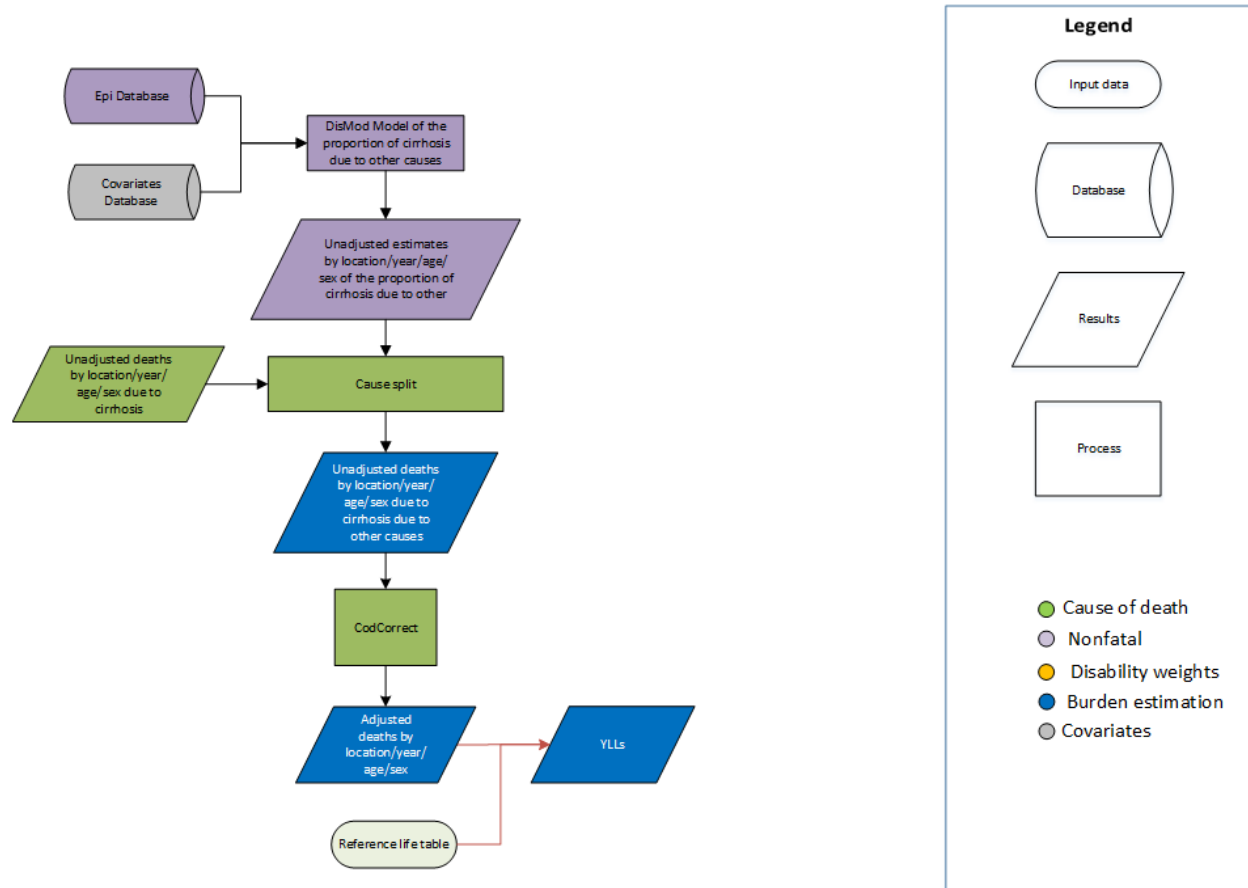

### Input data

We conducted a literature review for studies reporting etiologies of cirrhosis patients.

### Modeling strategy

We first modeled all cirrhosis mortality using all available data in the cause of death database and a hybrid CODEm model. To estimate mortality from cirrhosis due to alcohol, cirrhosis due to hepatitis B, cirrhosis due to hepatitis C, and cirrhosis due to other causes, we developed etiological proportion models using DisMod and used the results of these models to split the parent cirrhosis mortality estimates.

Given the similar etiologies for liver cancer and cirrhosis we integrated the etiology models for these two causes. We have more data for liver cancer etiologies than we do for cirrhosis. Therefore, we first developed four single-parameter DisMod models, each to estimate the proportion of liver cancer due to a given cause (i.e., alcohol, hepatitis B, hepatitis C, and other). These models included as covariates alcohol consumption (liters per capita), hepatitis B surface antigen (HBsAg) seroprevalence, and hepatitis C (anti-HCV IgG) seroprevalence. Moreover, the model for the proportion due to alcohol

included a binary covariate indicating countries with a predominantly Muslim population (thought to be associated with very low alcohol consumption). Estimates from these liver cancer models were then used as covariates (along with alcohol, HBsAg, and anti-HCV) in the four corresponding cirrhosis etiology models. Estimates from these cirrhosis models were then similarly used as covariates in the corresponding liver cancer models. Proportions from the four etiology models were then rescaled to sum to one at the draw level, and used to split the parent cirrhosis mortality estimates.

To better integrate our liver cancer and cirrhosis models, we implemented the aforementioned covariate cycle approach as an improvement for GBD 2015.

## Chronic Kidney Disease

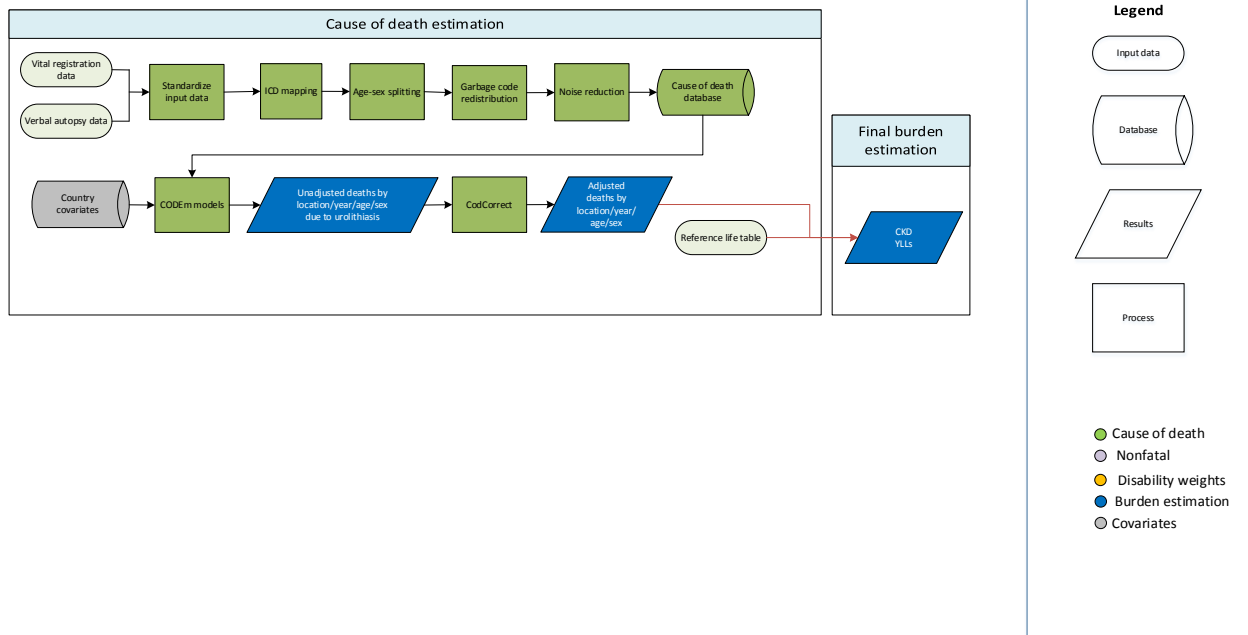

### Input data

Mortality estimates for chronic kidney disease (CKD) were informed using vital registration and verbal autopsy data from the COD database. These data were uploaded into the COD estimation tool, CODEm, to estimate CKD deaths by age-group and gender from 1990 to 2015. Data points were selected for outliering if they deviated significantly from other age- and gender-grouped data points within the region.

### Modeling strategy

The modeling strategy for GBD 2015 CKD estimation largely follows the methods used for GBD 2013. The major changes include increased data sources, specifically for China and India. As China's and India's populations are very large, this has resulted in notably higher global estimates of CKD mortality when compared to results from the GBD 2013 analysis.

Vital registration data were standardized, and mapped according to the GBD COD ICD mapping method. These data were then age-sex split, and appropriate redistribution of data was performed using garbage coding. After applying noise reduction, these data were then uploaded to the COD database.

Country covariates included in the models are the following: "animal fat," "diabetes," "education," "health system access," "LDI," "mean BMI," "mean cholesterol," "mean systolic blood pressure," "red meat," "total kcal," "whole grains," and "SDI." Iterations of models were assessed at the location/year/age-group/sex level to determine whether data points merited exclusion via outliering.

## Chronic Kidney Disease subtypes

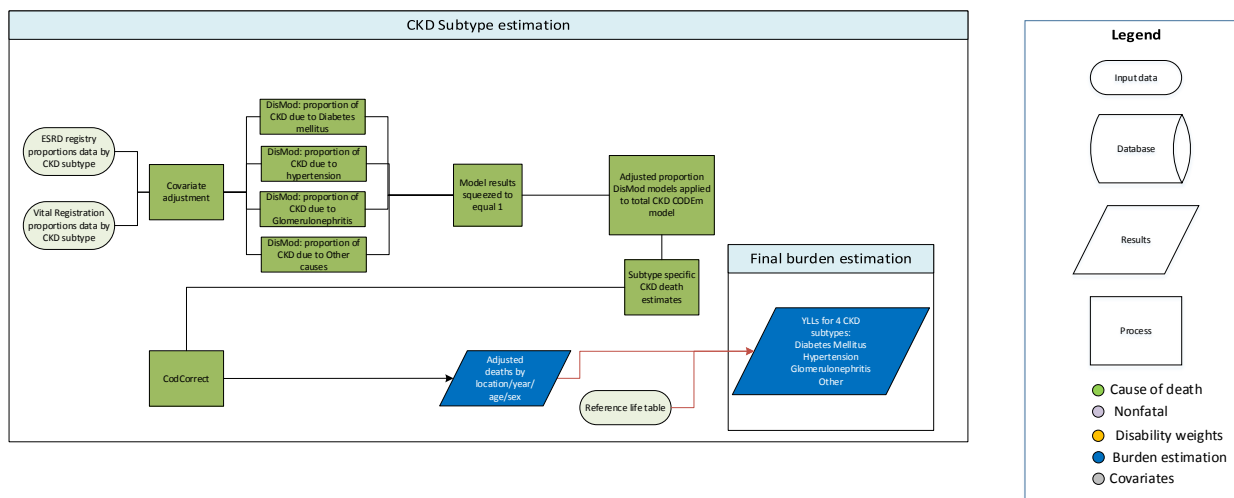

### Input data

The estimation strategy for CKD subtypes of 1) diabetes mellitus 2) hypertension 3) glomerulonephritis and 4) “other” has changed significantly from the GBD 2013 analysis to achieve consistency of method among the four subtypes as well as full use of all available data. Details of this improved method are detailed below.

Data sources which informed these estimates include vital registration (VR) data from the COD database and end-stage renal disease (ESRD) registry subtype data from ESRD registries. ESRD deaths as listed in the COD database were determined used ICD coding. Raw proportions of deaths by CKD subtype were extracted from the COD database. Vital registration data by CKD subtype were prepared following standard central COD database standardization, ICD mapping, age-sex splitting, and redistribution. Prevalent or incident proportions of CKD subtypes were extracted from renal registries. These data were reviewed for appropriateness for inclusion into the CKD subtype mortality analysis. Registry inclusion was determined based on whether 1) the registry data offered complete capture of dialysis activity within the country or subnational region, 2) the baseline extraction criteria were available, such as ages described, gender data 3) all subtypes were available for extraction 4) subtypes were provided in enough etiology detail to allow for recalculation of our definition of “other.” GBD 2015 “other” category excludes cystic disease deaths, urolithiasis deaths, deaths from genetic/hereditary causes, nephritis, and deaths from kidney cancer. As all categories were not explicitly listed in all registries, baseline criteria for inclusion based on ability to re-calculate “other” category included ability to exclude “cystic diseases,” “urinary/urolithiasis,” and “nephritis.”

### Modeling strategy

ESRD and vital registration proportion data were uploaded to the nonfatal database, then the VR proportions were adjusted to the registry proportions by using a study-level covariate. For each subtype, the proportions from the VR data were combined to the proportions from registry data. The VR data were adjusted to the ESRD proportions by use of a covariate where registry data equals 0, and VR data

equals 1. We adjusted the VR data to the registry data as we determined the registry data to be more accurate, as most national registries have 100% capture of ESRD activity within their country. This method relies on the assumption that death rates among CKD subtypes do not significantly differ in a clinically meaningful way from incidence/prevalence of ESRD by subtype.

Once these data types were uploaded and assigned a covariate value, they were then uploaded to the disease modeling tool DisMod, which estimates proportions of each subtype by location/year/age/sex. These models are then centrally squeezed so that estimates across the subtypes equal 1. These adjusted proportions are then applied to the parent CKD CODEm model to result in death estimates by CKD subtype that are internally consistent to the parent CKD death estimates.

# Hemoglobinopathies and hemolytic anemias

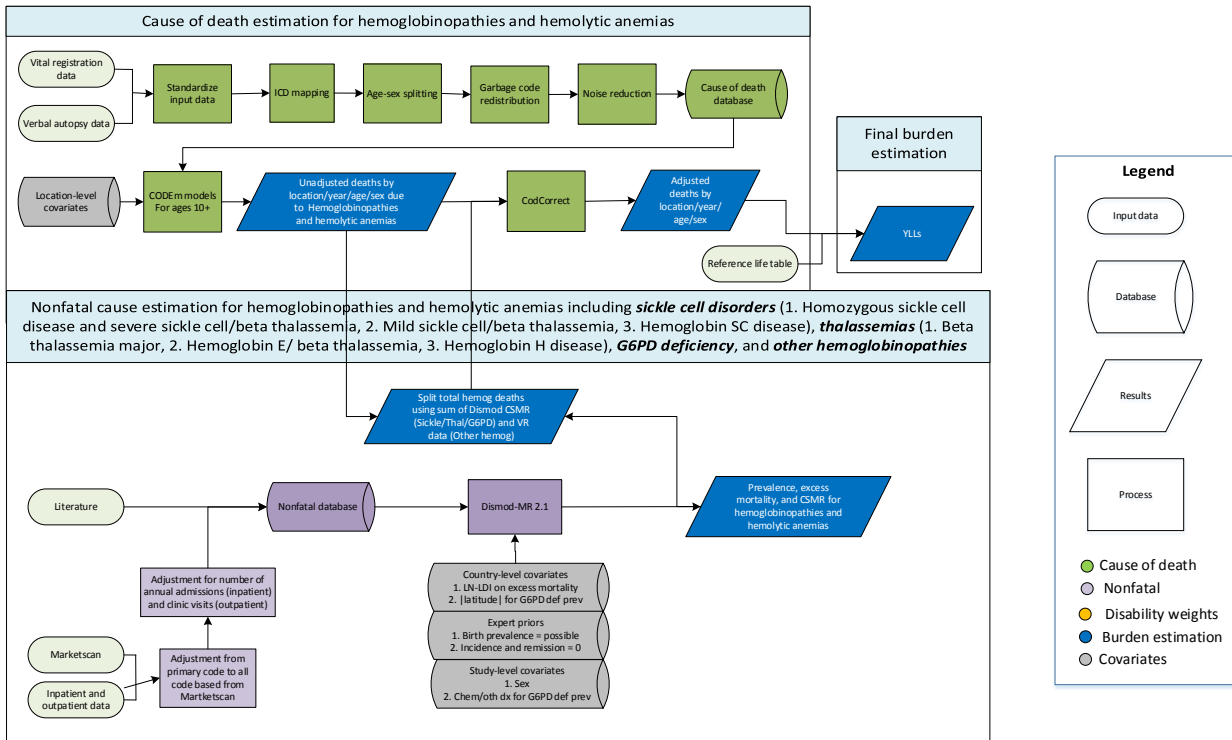

## Input data

CODEm models were informed by centrally prepped data stored in the cause of death (COD) database. All data from all geographies were reviewed. Outliers were identified as those data where age patterns or temporal patterns were inconsistent with neighboring age groups or locations or where sparse data were predicting implausible overall temporal or age patterns for a given location.

Each datum for sickle cell disease was used for one of three mutually exclusive conditions: 1) homozygous sickle cell disease and severe sickle cell/beta thalassemia, 2) Mild sickle cell/beta thalassemia, or 3) Hemoglobin SC disease. We similarly extracted data for thalassemias using three mutually exclusive disease states: 1) Beta thalassemia major, 2) Hemoglobin E/beta thalassemia, and 3) Hemoglobin H disease. G6PD deficiency was estimated as a single model.

Three sources of data were used for DisMod-MR 2.1 models. First, we re-extracted all literature sources in GBD 2013, so elected not to perform an additional review of literature published in the last two years, and included data on prevalence, excess-mortality rate, or with-condition mortality rate. Age-specific survival probabilities from cohort studies were converted to corresponding with-condition mortality rates. We also included additional sources recommended by GBD 2015 collaborators or identified during the process of re-extraction. G6PD deficiency is an X-linked recessive genetic disease, and genetic homozygosity served as the reference definition for our DisMod-MR 2.1 models in 2015. This is a change from GBD 2013 when we quantified G6PD deficiency on reagent tests as the reference category. Second, we extracted ICD-9-coded Marketscan data from the United States, correcting for multiple outpatient and inpatient visits as determined from patient linkage analysis. Third, we used ICD-9 and ICD-10 inpatient and outpatient hospital data from all those locations where it was available. We calculated the



ratio of prevalence that would be derived from only using the primary discharge ICD code versus that derived from using any of the discharge diagnosis codes. We applied this as a correction factor for those sources where only a single ICD code is given for each discharge. Of note, there were no hospital data available for Hemoglobin E/beta-thalassemia, Hemoglobin H disease, or G6PD deficiency. All prevalence data from Marketscan, hospital sources, and literature were uploaded to the nonfatal database. With the addition of hospital and Marketscan sources, our dataset was significantly larger than that used in GBD 2013.

### **Modeling strategy**

We completed seven separate DisMod-MR 2.1 models as listed above. Each used log-transformed lag-distributed income as a country-level covariate on excess mortality, which had the effect of predicting higher excess mortality in those locations with lower national income. The only study covariate used for most models was for gender. Genetic G6PD deficiency is far more common in males, but for all others the male to female ratio is nearly equivalent. Our G6PD deficiency model included additional study covariates to crosswalk from non-genetic diagnostic tests (e.g., chemical reagent testing) back to the reference definition. Incidence and remission were both set to be zero.

We completed data-rich (DR) and global CODEm models for males and females separately. The sum of CSMR from all seven DisMod-MR 2.1 models was used as a predictive covariate for CODEm model development. CODEm results were then split between sickle cell disorders, thalassemias, G6PD deficiency, and other hemoglobinopathies and hemolytic anemias using summed and scaled CSMR outputs from the same models. Other hemoglobinopathies and hemolytic anemias did not have a separate DisMod-MR 2.1 model, but was instead informed by location-specific VR data.

The primary limitation of our estimation is data availability. We elected a hybrid approach of CODEm and DisMod-MR 2.1 to improve the quality of estimates in data-poor locations, but in most of these locations data are still relatively sparse for nonfatal models, which leads to relatively large uncertainty. Further adding to the uncertainty is the fact that hemoglobinopathies dramatically increase the risk of mortality due to infectious agents such as malaria, lower respiratory infections, and diarrhea, as well as increasing the risk of maternal mortality. In locations with poor diagnostic capabilities and high infectious burden, it is thus very plausible that mortality due to hemoglobinopathies may be even higher. Secondly, our specification of seven distinct entities for DisMod-MR 2.1 models does not align perfectly with the cause categories in the central COD prep, which limits the extent to which CSMR data from the COD database can inform nonfatal models. We will continue to work to expand our dataset and consolidate the GBD analysis of hemoglobinopathies going forward.

## 2.7 HIV/AIDS and tuberculosis

### Tuberculosis

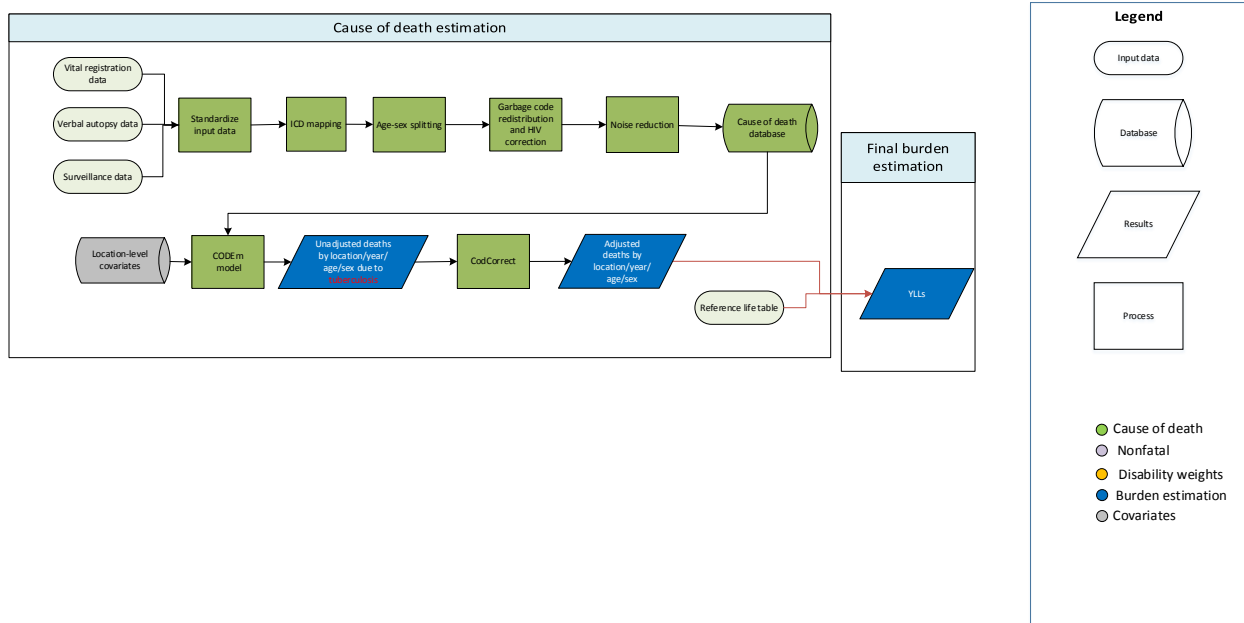

#### Input data

Input data for modeling tuberculosis mortality among HIV-negative individuals include vital registration, verbal autopsy, and surveillance data. Vital registration data were adjusted for garbage coding (including ill-defined codes, and the use of intermediate causes) following GBD algorithms and misclassified HIV deaths (i.e., HIV deaths being assigned to other underlying causes of death such as tuberculosis or diarrhea because of stigma or misdiagnosis). This correction was done based on examining changes in the age pattern of diseases over time.

Verbal autopsy data in countries with age-standardized HIV prevalence greater than 5% were removed because of a high probability of misclassification, as verbal autopsy studies have poor validity in distinguishing HIV deaths from HIV-TB deaths. We also outliered data that were largely conflicting with the majority of data from other studies conducted either in the same or different countries (with similar sociodemographic characteristics) in the same region.

#### Modeling strategy

A general CODEm modeling strategy was used.

# HIV/AIDS

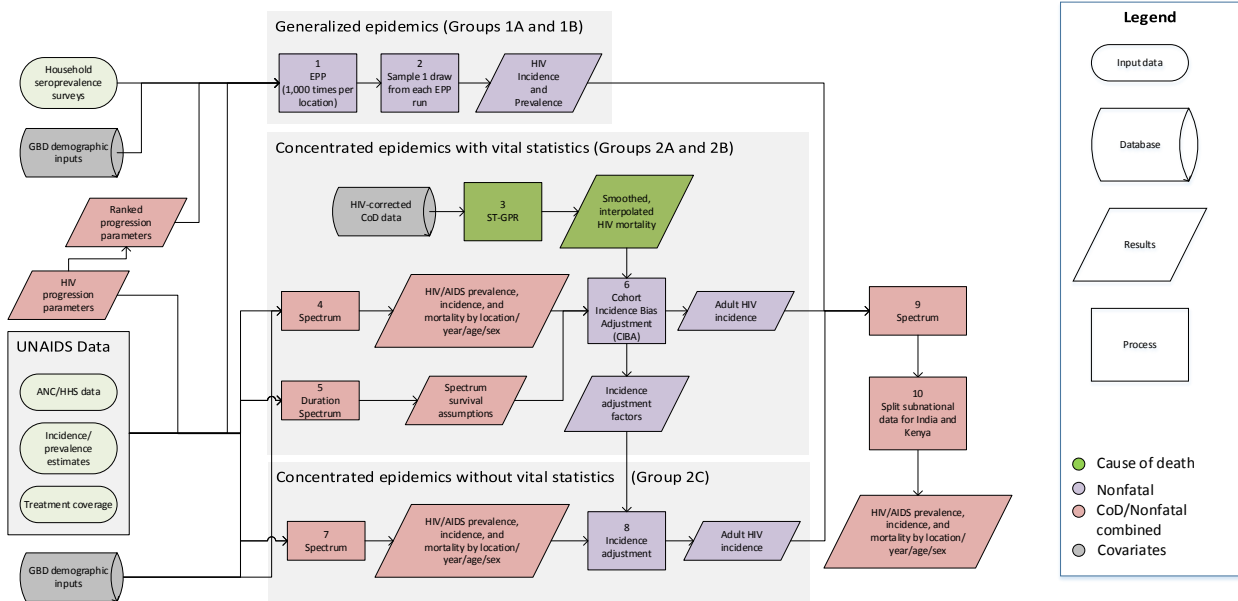

## Input data

### Household seroprevalence surveys

Geographically representative HIV seroprevalence survey results were used as inputs to the model for countries with generalized HIV epidemics where available.

### GBD demographic inputs

Location-specific population, fertility, and HIV-free survival rates from GBD 2015 (see Part 1 for details on the generation of these data) and migration data from UNAIDS were used as inputs in modeling all locations.

### UNAIDS data

Antenatal care, incidence, prevalence, and treatment coverage data from UNAIDS were used in modeling for all locations.

### On-ART literature data

Data were identified by using search terms “HIV,” “mortality,” and “antiretroviral therapy” in PubMed searches across the literature. To be included, studies must include only HIV-positive people who receive antiretroviral therapy (ART) but who were ART-naïve prior to the study. In addition, studies must report either a duration-specific mortality proportion or a hazard ratio across age or sex, and must not include children.

For duration-specific survival data, studies must report uncertainty on mortality estimates or provide stratum-specific sample sizes and must include duration-specific data to allow for calculation of 0-6, 7-12, or 13-24 month conditional mortality. In addition, studies must either report separate mortality and

loss-to-follow-up (LTFU) curves, be corrected for LTFU using vital registration data, or be conducted in a high-income setting. Finally, studies must report the percent of participants who are male, the median age of participants, and either data with specific data on the number of CD4 T lymphocytes (CD4 counts) or the median CD4 count used for the data.

Hazard ratio data for ages or sexes can only be used if the hazard ratios are controlled for other variables of interest (age, sex, and CD4 category).

#### Changes for GBD 2015

In GBD 2013, we identified 102 papers for extraction. For GBD 2015, we included 13 additional studies informing the duration-specific mortality estimation process and 26 studies informing the age and sex hazard ratio estimation process (some studies were used and counted in both). We also added one study to our LTFU analysis. In addition, we updated our data from the Antiretroviral Therapy Cohort Collaboration (ART-CC) with country-specific data pre- and post-2001 for enhanced use in estimating time trends for high-income countries. We excluded nine hazard ratio and four duration-specific mortality studies used in GBD 2013 which reported results on populations already present in other extracted studies. The inclusion of new ART-CC data necessitated the exclusion of four additional studies used in GBD 2013.

We also included on-ART cohort mortality data from 10 high-income nations with collaboration from ART-CC. These countries include Austria, Denmark, France, Germany, Italy, the Netherlands, Spain, Switzerland, the United Kingdom, and the United States. We excluded the US data because they were not fully representative of the complete with-HIV on-ART population at the time.

#### Off-ART literature data

In GBD 2013, to characterize uncertainty in the progression and death rates, we systematically reviewed the literature on mortality without ART. We searched terms related to pre-ART or ART-naïve survival since seroconversion.<sup>1</sup> After screening, we identified 13 cohort studies that included the cohorts used by UNAIDS from which we extracted survival at each one-year point after infection. Screening for additional, recently published studies for GBD 2015 identified no new cohort studies for inclusion in this analysis.

#### Burden estimation

The files compiled by UNAIDS for their HIV/AIDS estimation process were our main source of data for producing estimates of HIV burden. These files are typically country-specific and contain both demographic data (population, fertility, migration, and HIV-free survival rates) and HIV-specific information. In all cases except migration, we substituted in our own, internally consistent demographic estimates. The HIV-specific information includes what is needed to run both the Spectrum and Estimation and Project Package (EPP) models. Spectrum requires data on AIDS mortality among people living with HIV with and without ART, CD4 progression among people living with HIV not on ART, ART coverage among adults and children, coverage of breastfeeding among women living with HIV, prevention of mother-to-child transmission coverage, and CD4 thresholds for treatment eligibility. EPP uses many of the same assumptions as Spectrum but fits a simpler model to HIV prevalence data from surveillance sites and large household surveys. We extracted all of these data from UNAIDS' proprietary formats.

Between GBD 2013 and 2015, we received new files for all locations in which UNAIDS produces estimates except Indian subnational locations and locations identified as high-income. For many of the missing countries, we had UNAIDS files from the previous estimation process, which we used again. After combining these two sources, we were left with a set of 41 locations for which we had never received a UNAIDS file, many of them smaller countries with less severe HIV epidemics. In those places, we generated regional averages of all needed inputs. This enabled us to run Spectrum for every GBD location.

In several cases, we have modified the structure or data in the UNAIDS files. In South Africa, which has been estimated at the province level in GBD 2015, we split the national-level UNAIDS file into nine provincial datasets. We used GBD 2015 demographic inputs for the provinces. These provinces are already fit as separate subpopulations in EPP, so we extracted the prevalence data for the individual provinces and assumed national rates for all other Spectrum inputs. The only location where GBD 2015 demographic inputs are not used is Moldova, where UNAIDS data are provided at the subnational level but GBD 2015 demographic inputs are only generated at the national level. Child ART coverage rates were implausibly high in the South Africa Spectrum data in 2015, so we extrapolated using the rate of increase over the past five years. Additionally, we identified that the ratio of fertility in HIV-positive women to HIV-negative women was negative in Indonesia. We used linear extrapolation to replace this value.

We used all available sources of vital registration data from the GBD Causes of Death database after garbage code redistribution and HIV/AIDS mis-coding correction, excluding countries with seroprevalence surveys and antenatal clinic data (Group 1 countries as described in Part 1)<sup>2,3</sup>. There are two different cause of death data sources for HIV/AIDS in China: the Disease Surveillance Point (DSP) system and the Notifiable Infectious Disease Reporting (NIDR) system. Both systems are administered by the Chinese Center for Disease Control and Prevention, but the reported number of deaths due to HIV is significantly lower in DSP. Therefore, we have used the provincial-level ratio of deaths due to HIV/AIDS from NIDR to those from DSP, choosing the larger ratio between years 2013 and 2014, and scaled the reported deaths in the DSP system, which is in turn used in the Space-Time Gaussian Process Regression (ST-GPR) process.

#### Modeling strategy

In GBD 2015, our general modeling strategy for estimating HIV incidence, prevalence, and mortality is similar in many ways to the strategy used in GBD 2013. In GBD 2015, we continue to use the Spectrum program rewritten in Python for GBD 2013 to facilitate faster and more flexible execution necessary for our more intensive computational needs. We made several changes to Spectrum's assumptions comparing to the Spectrum software used by UNAIDS. A key change in GBD 2015 is the application of EPP using an open-source computer program in R written by Jeffrey Eaton.<sup>4</sup> We ran EPP for all group 1 countries in order to produce incidence curves that were consistent with the demographic and epidemiological assumptions used in GBD 2015. This differed from GBD 2013, where we used the incidence curves provided by UNAIDS.

#### On-ART

First, we corrected reported probabilities of death for loss to follow-up using an update of the approach developed by Verguet and colleagues.<sup>5</sup> Verguet and colleagues used tracing and follow-up studies to empirically estimate the relationship between death in LTFU and the rate of LTFU.

After extracting the survival data into duration-specific conditional mortality, we used DisMod-MR 2.0 to synthesize the data into estimates of conditional probability of death over initial CD4 count.<sup>1</sup> We modeled the data separately by duration and added a fixed effect on whether the study was conducted prior to 2002. Each analysis was conducted separately for high-income countries, GBD low-income countries outside of sub-Saharan Africa, and sub-Saharan Africa.

To create estimates of age-specific hazard ratios, we synthesized hazard ratio data in five broad age groups: 15-25, 25-35, 35-45, 45-55, 55-100, and modeled the data using DisMod-MR 2.0.

To create estimates of sex-specific hazard ratios, we use the *metan* function in Stata to create estimates of relative risks separately by region, using female age groups as the reference group.

The age and sex hazard ratios were applied to the CD4-specific mortality rates, accounting for the distribution of ages and sexes in the mortality data. We then subtracted HIV-free mortality from the model life table process to calculate HIV-specific mortality, and used 1,000 draws from the posterior distribution for each age, sex, and CD4 category for conditional probabilities of death for 0-6 months, 7-12 months, and 13-24 months after initiation of ART as inputs into Spectrum.

#### Changes for GBD 2015

In GBD 2015, our primary methodological change was the analysis of on-ART mortality using a fixed effect on studies before/after 2002, only in the high-income region, to estimate conditional probability of death in DisMod-MR 2.0. By doing so, we incorporated changes over time in the quality of on-ART care which may improve on-ART mortality. This change was also complemented by the inclusion of time-split data from ART-CC, which allowed us to incorporate this time trend across the large cohort. We then used the estimated post-2002 on-ART mortality through the rest of the on-ART estimation process.

#### Off-ART

Following UNAIDS assumptions, no-ART mortality is modeled as shown in the figure below.<sup>1</sup>

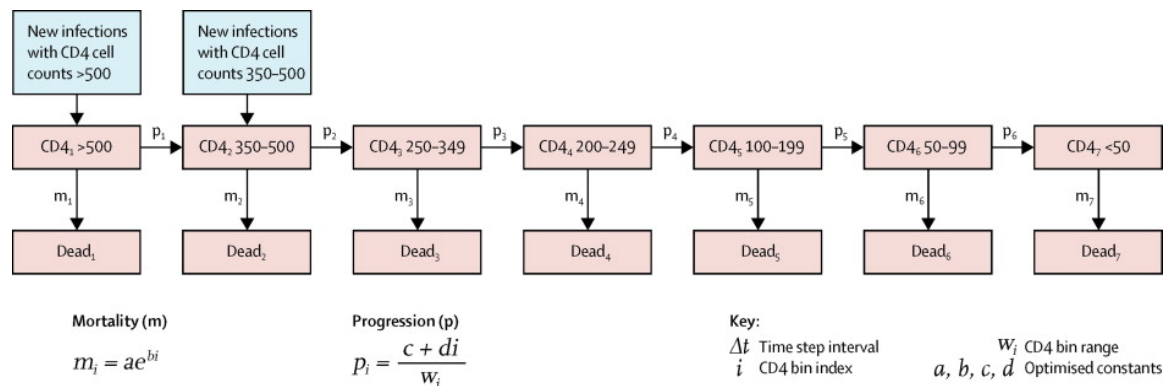

The death and progression rates between CD4 categories vary by age according to four age-groups, 15–24 years, 25–34 years, 35–44 years, and 45 years or older. We modeled the logit of the conditional probability of death between years in these studies using the following formula:

$$\text{logit}(m_{ijk}) = \beta_0 + \sum_{i=1}^4 \beta_{1i} a_i + \sum_{j=1}^{12} \beta_{2j} t_j + u_k + \varepsilon_{ijk}$$

In the formula,  $m$  is conditional probability of death from year  $t_j$  to  $t_{j+1}$ ,  $a_i$  is an indicator variable for age group at seroconversion (15–24 years, 25–34 years, 35–44 years, and 45 years or older),  $t_j$  is an indicator variable of year since seroconversion, and  $u_k$  is a study-level random effect.

By sampling the variance-covariance matrix of the regression coefficients and the study-level random effect, we generated 1,000 survival curves for each age group that capture the systematic variation in survival across the available studies. For each of the 1,000 survival curves, we use a framework modeled after the UNAIDS optimization framework in which we find a set of progression and death rates that minimizes the sum of the squared errors for the fit to the survival curve.<sup>6,7</sup>

#### Burden estimation overview

UNAIDS uses two key analytical components in their epidemiological estimation. EPP is used to estimate incidence trajectories that are consistent with prevalence surveys and other prevalence measurements such as antenatal clinic serosurveillance. Spectrum is a compartmental HIV progression model used to generate age-specific incidence, prevalence, and death rates from the EPP incidence curves and assumptions about intervention scale-up and local variation in epidemiology.

For GBD 2013, we created an exact replica of Spectrum in Python. This enabled us to run thousands of iterations of the model at once on our computing cluster and allowed for more flexible input data structures. Additionally, in order to generate estimates with more realistic ranges of uncertainty than those in UNAIDS 2012, we adjusted all input data by uniformly sampled factors between 0.9 and 1.1. These changes, along with our new estimation of with- and without-ART mortality and CD4 progression parameters, persist into GBD 2015.

We have made several substantial improvements elsewhere in the process for GBD 2015. Of particular note, we have integrated EPP into the modeling process when feasible, enabling more robust and internally consistent incorporation of parameter uncertainty in generalized epidemics, and we have vastly improved the accuracy of the incidence adjustment used to fit Spectrum to high-quality vital registration data. Details of the impacts are included in the descriptions of the appropriate country strategies.

Due to the substantial differences in the quality and types of data available across different countries, we used three different methodologies to produce year-, age-, and sex-specific estimates of HIV incidence, prevalence, and mortality.

#### Countries with seroprevalence surveys and antenatal clinic data (Groups 1A and 1B)

We identified 43 countries – as well as 48 subnational locations from India, Kenya, Mozambique, and South Africa – with at least one geographically representative HIV seroprevalence survey. In order to ensure that our estimates of incidence and prevalence in these places were consistent with our estimates of HIV progression, we used a version of EPP written in R and C++ by Jeffrey Eaton to create new fits to the prevalence data in the UNAIDS files. By substituting in our own assumptions about HIV progression, we were able to ensure that the implied relationship between incidence and mortality/prevalence in EPP is similar to that in Spectrum.

In these locations, most of which experience generalized HIV epidemics, we expect estimates of HIV burden to exhibit substantial uncertainty. To reflect this, we induced a perfect correlation between the previously independent draws of HIV mortality with and without ART and CD4 progression. We paired the draws of the three parameter sets internally and with each other in the following way: we sorted

without-ART mortality and CD4 progression internally by age (not CD4), meaning the highest draw of HIV mortality without ART for age  $a_i$  and CD4 category  $c_i$  will be paired with the highest draw of HIV mortality without ART for age  $a_k$  and CD4 category  $c_j$ . In the same way, we sorted with-ART mortality internally by age, sex, CD4 count at treatment initiation, and duration on treatment. After this sorting process, the lowest indexed draw of each parameter has the highest values and vice versa. This means that we will use the most extreme possible parameter sets in EPP and Spectrum and should see a commensurate expansion in the range of the uncertainty.

To ensure that this expanded uncertainty is replicated in EPP, we fit the model once for every set of paired draws of the progression parameters for every location. This means that the first iteration of EPP for Uganda sees the highest draws of all three sets of progression parameters. Such a procedure is necessary because EPP currently has no mechanism for incorporating uncertainty in any inputs except prevalence data. This process (Process 1 in the HIV/AIDS Estimation Flowchart), produced 1,000 sets of EPP output for each of the locations that make up the 47 countries in the group. Every set of EPP outputs contains 500 consistent draws of HIV incidence and prevalence in adults aged 15-49. In many cases, the algorithm used to fit EPP, incremental mixture importance sampling, failed, resulting in fewer than 1,000 sets of EPP results.

For every location in the group, we sampled one of the 500 incidence/prevalence draws from each of the sets of EPP results (Process 2 in the HIV/AIDS Estimation Flowchart). By sampling one draw from each set, we ensured that the distribution of progression parameters dictating the relationship between incidence and prevalence was exactly the same as the distribution of the sorted parameters generated in the previous step. In locations where not all 1,000 iterations of EPP fit successfully, we sampled one draw from every iteration that did succeed and then resampled with replacement from that set of draws. To maintain the link between the input progression draws and the resulting incidence and prevalence draws from EPP, we replaced any parameter draw associated with a failed run of EPP with the parameter draw that that failed draw was replaced with. At the end of this process, for every location in the set of 47 countries, we were left with 1,000 linked draws of adult incidence and prevalence and the exact progression parameters that generated those draws.

We then ran these results, along with the previously described demographic and HIV-specific inputs, through Spectrum to produce location-, year-, age-, and sex-specific estimates of HIV incidence, prevalence, and mortality (Process 9 in the HIV/AIDS Estimation Flowchart).

Countries with vital registration data (Group 2A and 2B)

Vital registration is one of the highest-quality sources of data on HIV burden in many countries, so generating estimates that are consistent with these data, with necessary adjustment to account for any potential underreporting, is critical. We identified 116 countries – as well as 208 subnational locations from Brazil, China, Japan, Mexico, Saudi Arabia, Sweden, United Kingdom, and United States – with vital registration data or sample registration systems such as DSP in China.

We imputed missing years of data to generate a complete time series for HIV from the estimated start year of the epidemic using ST-GPR. We analyzed mortality trends using ST-GPR starting in 1981, the year that HIV was first identified in the United States.<sup>8</sup> For ST-GPR, we adjusted the lambda (time weight) and GPR scale according to the completeness of vital registration data, based on whether a country had 10 or more years of complete VR data as analyzed by the Death Distribution Methods (DDM) model described in Part 1. We produced separate splines by country/age group, up to the peak year of death



rate. We then ran a linear regression with random effects on region, age, and sex. Following this, we ran space-time residual smoothing, in which time, age, and space weights are used to inform smoothing of the residuals between data points and the linear regression estimate. From this process, we generated space-time estimates with the applied weights, along with the median absolute deviation (MAD) of the space-time estimates from the data. The MAD was calculated at various levels of the geographic hierarchy (e.g., subnational and national), and was added into the data variance term. The data variance and space-time estimates were then analyzed using Gaussian Process Regression to return a final estimate of mortality along with uncertainty.

Although Spectrum produces HIV mortality estimates that are within the realm of possibility in most countries using the incidence curves provided in the UNAIDS 2012/2015 country files, it is a deterministic model that has not yet been integrated into an optimizable framework. Therefore, in order to “fit” it to vital registration data, we need to adjust input incidence. For GBD 2013, we used a process that assumed several different durations between HIV infection and HIV death and adjusted incidence based on death some number of years in the future. Although that method worked relatively well and substantially reduced the disconnect between Spectrum and the VR data, it required very rigid and unrealistic assumptions about these survival durations. For GBD 2015, we have improved the performance of this method, allowing Spectrum to fit to the VR data more closely.

To improve the fit of this process, we restructured Spectrum to add compartments that identify groups of people living with HIV by year of infection (Process 5 in the HIV/AIDS Estimation Flowchart). With this version of Spectrum we can output, among many other metrics, HIV deaths by year, age, sex, and infection cohort. This enables us to adjust incidence to fit to death much more precisely and without making any rigid assumptions about the time from HIV infection to HIV death.

We have incorporated these improvements into a cohort incidence bias adjustment (CIBA) process. First, we ran Spectrum normally to produce 1,000 draws of incidence, prevalence and mortality (Process 4 in the HIV/AIDS Estimation Flowchart). Then, by year, age, and sex, we took the ratio of VR deaths to Spectrum deaths to quantify the amount of bias in Spectrum. Using the mean duration data from the new version of Spectrum, for every year-, age-, and sex-specific infection cohort, we calculated the share of all HIV deaths observed over the course of the projection period in that cohort that would occur in each year after the year of infection. For example, projecting from 1970 through 2015, we identified the cohort of men infected in 1992 at the age of 16, calculated the total number of HIV deaths in that cohort in all subsequent years through the end of 2015, and divided the annual number of deaths by that total. This showed us the distribution of deaths among that cohort over the projection period. In the most extreme case (infections in 2014), we could only produce one point of that distribution (2015), so that single value is exactly 1.0; 100% of the deaths observed in that cohort occurred in 2015.

We then used these distributions of death to weigh the ratio of VR deaths to Spectrum deaths, meaning that ratios in the years where we expect the largest share of deaths were weighed most heavily. We then multiplied the initial size of that cohort from the normal run of Spectrum by the sum of the combined ratios to get a new estimate of new cases in that year/age/sex combination.

We can write this method mathematically in the following way:

$$r_t = \frac{VR_t}{D_t}$$

$$\rho_t^{t-i} = \frac{d_t^{t-i}}{\sum_{k=t-i+1}^n d_k^{t-i}}$$

$$\alpha^{t-i} = \sum_{k=t-i+1}^n r_k * \rho_k^{t-i}$$

$$n_{\text{adjusted}}^{t-i} = \alpha^{t-i} * n^{t-i}$$

$VR_t$  is the number of HIV/AIDS deaths in year  $t$  from ST-GPR, and  $D_t$  is the number of HIV/AIDS deaths from the first run of Spectrum. In the second equation,  $d_t^{t-i}$  is the number of HIV/AIDS deaths among members of infection cohort  $t - i$  in year  $t$ , with  $i \geq 1$ , from the new, duration-tracking version of Spectrum, and  $n$  is final year of the projection. Therefore,  $\rho_t^{t-i}$  is the share of observed deaths in cohort  $t - i$  that we expect to occur in year  $t$ . It follows, that  $\alpha^{t-i}$  is the weighted adjustment ratio described above, which we multiply by the estimated initial size of infection cohort  $t - i$  as calculated in the first stage Spectrum run to get the adjusted number of new cases,  $n_{\text{adjusted}}^{t-i}$ . This process is run separately for every sex and single-age pair.

CIBA (Process 6 in the HIV/AIDS Estimation Flowchart) allows ratios in each year after a given infection year to influence the final adjustment to incidence. The size of that influence is determined by the relative importance of that year in the cohort-year's distribution of deaths over time. The result is a new set of 1,000 draws of incidence and a set of 1,000 ratios of post-adjustment incidence to pre-adjustment incidence. We perform this adjustment using mean durations from the new version of Spectrum in order to try to shift the mean of the regular distribution of deaths.

Finally, to produce location-, year-, age-, and sex-specific estimates of HIV incidence, prevalence and mortality, we ran the new estimates of incidence and all previously input data through Spectrum (Process 9 in the HIV/AIDS Estimation Flowchart).

Countries without survey data and vital registration data (Group 2C)

The remaining 24 countries – as well as nine subnational locations from China and Saudi Arabia – had neither geographically representative seroprevalence surveys nor reliable vital registration systems. To produce estimates of HIV burden in these countries, we assumed that Spectrum is similarly biased as in other Group 2 countries. This involved running Spectrum (Process 7 in the HIV/AIDS Estimation Flowchart), adjusting incidence using 1,000 adjustment ratios randomly sampled from the entire set of CIBA results (Process 8), and rerunning Spectrum using the new draws of adjusted incidence (Process 9). As above, the estimates of incidence, prevalence, and mortality were incorporated into the rest of the machinery via the reckoning process.

Originally, Cambodia, which does have a prevalence survey, was included in this group because we have not yet coded the machinery necessary to reproduce the Asian Epidemic Model used by UNAIDS to model prevalence and incidence in Southeast Asian countries.<sup>9</sup> The 2005 DHS survey in Cambodia made clear that we were underestimating the burden due to HIV there by not using survey data during the modeling process. In order to more accurately represent the epidemic, we used the mortality profile from Thailand and scaled it by 80%, the ratio of estimated prevalence rate in Thailand in 2005 and the prevalence rate from the DHS survey in Cambodia. We then treated the scaled death series as VR data and added Cambodia to the 2B group that is run through CIBA.

## Subnational splitting for India and Kenya

Spectrum results for India and Kenya subnational locations are modeled at higher levels of geography than our GBD locations. For example, Spectrum results for India are produced at the state level, while GBD 2015 estimates were produced at the state urban-rural level. Similarly, Spectrum is modeled at the province level, while we compute Kenyan subnational estimates for the 47 counties. To split the Spectrum results into more granular results for processing, we assign each GBD subnational unit to a Spectrum modeling unit. From this, we generate age/sex/year-specific proportions for population, HIV-specific death, and HIV-free mortality.

After this subnational splitting, results were incorporated into the all-cause mortality estimation machinery via the reckoning process described in Part 1.

## HIV/AIDS resulting in other diseases

There are two Level 4 causes under the HIV/AIDS Level 3 cause in the GBD 2015 cause hierarchy. The modeling process for HIV/AIDS-tuberculosis is detailed in Part 3. We computed deaths for HIV resulting in other diseases by subtracting HIV/AIDS-tuberculosis deaths from all HIV deaths at the 1,000 draw level.

## References

- 1 Murray CJL, Ortblad KF, Guinovart C, *et al.* Global, regional, and national incidence and mortality for HIV, tuberculosis, and malaria during 1990–2013: a systematic analysis for the Global Burden of Disease Study 2013. *The Lancet* 2014; **384**: 1005–70.
- 2 Global, regional, and national age–sex specific all-cause and cause-specific mortality for 240 causes of death, 1990–2013: a systematic analysis for the Global Burden of Disease Study 2013. *The Lancet* 2015; **385**: 117–71.
- 3 Birnbaum JK, Murray CJ, Lozano R. Exposing misclassified HIV/AIDS deaths in South Africa. *Bull World Health Organ* 2011; **89**: 278–85.
- 4 jeffeaton/epp. GitHub. <https://github.com/jeffeaton/epp> (accessed April 21, 2016).
- 5 Verguet S, Lim SS, Murray CJL, Gakidou E, Salomon JA. Incorporating Loss to Follow-up in Estimates of Survival Among HIV-Infected Individuals in Sub-Saharan Africa Enrolled in Antiretroviral Therapy Programs. *J Infect Dis* 2013; **207**: 72–9.
- 6 Ghys PD, Zaba B, Prins M. Survival and mortality of people infected with HIV in low and middle income countries: results from the extended ALPHA network. *AIDS* 2007; **21 Suppl 6**: S1–4.
- 7 Hallett TB, Zaba B, Todd J, *et al.* Estimating incidence from prevalence in generalised HIV epidemics: methods and validation. *PLoS Med* 2008; **5**: e80.
- 8 CDC. Pneumocystis Pneumonia --- Los Angeles. MMWR Weekly. 1981; published online June 5. [http://www.cdc.gov/mmwr/preview/mmwrhtml/june\\_5.htm](http://www.cdc.gov/mmwr/preview/mmwrhtml/june_5.htm) (accessed April 21, 2016).

9 Brown T, Peerapatanapokin W. The Asian Epidemic Model: a process model for exploring HIV policy and programme alternatives in Asia. *Sex Transm Infect* 2004; **80 Suppl 1**: i19–24.

## HIV/AIDS-Tuberculosis

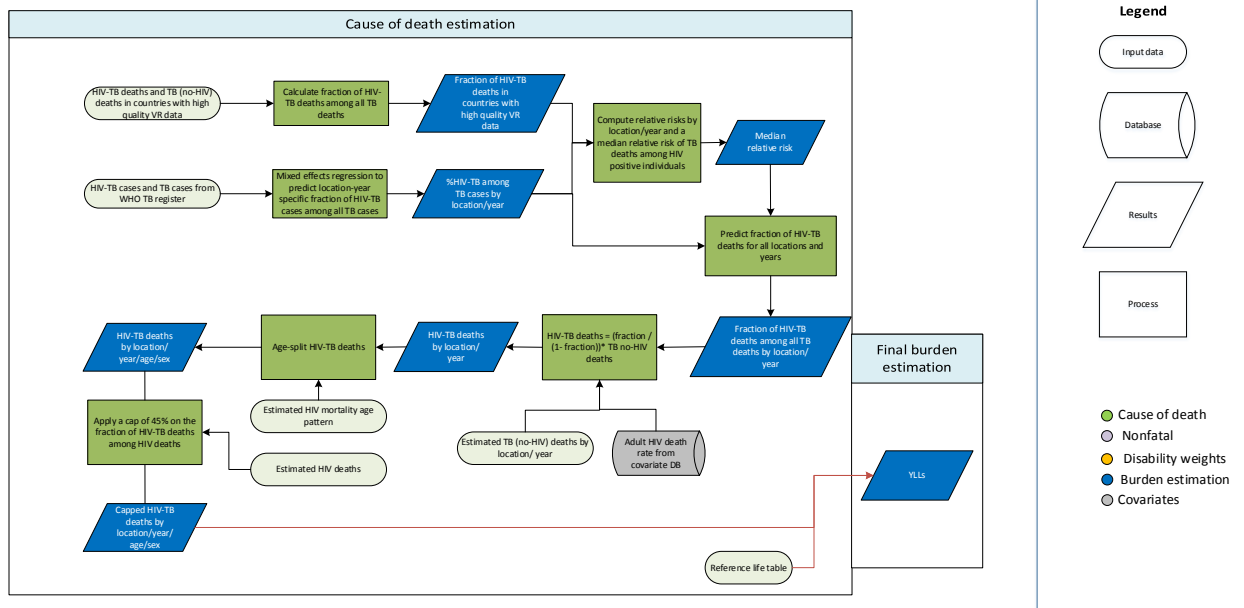

### Input data

Input data include: (i) 144 country-years of high-quality vital registration data where cause of death data for directly coded HIV/AIDS-tuberculosis (HIV-TB) and tuberculosis (TB) were available, and (ii) the number of TB cases (new and re-treatment) recorded as HIV-positive and the number of TB cases (new and re-treatment) with an HIV test result recorded in the TB register from the World Health Organization (WHO). We excluded data from countries with 10 HIV-TB deaths or less. We also excluded implausible data (e.g., proportion of HIV-TB cases among all TB cases greater than 1), and data that were largely conflicting with the majority of data for other years from the same country.

### Modeling strategy

To determine TB deaths in HIV-positive individuals, we first computed the fraction of HIV-TB deaths among all TB deaths using 144 country-years of high-quality vital registration data. We also calculated the proportion of HIV-TB cases among all TB cases (number of TB cases recorded as HIV-positive/number of TB cases with an HIV test result recorded in the WHO TB register), which we used as input data to predict the proportions of HIV-TB cases among all TB cases for all locations and years using an adult HIV death rate covariate and country-random effects. We estimated the fraction of HIV-TB deaths among all TB deaths, defined by

$$D = \frac{P(RR)}{P(RR) + (1 - P)}$$

where  $P$  is the proportion of HIV-TB cases among all TB cases and  $RR$  is the relative risk of TB deaths in HIV positive individuals, defined by:

$$RR = \frac{DP - D}{DP - P}$$

where  $D$  is the fraction of HIV-TB deaths among all TB deaths. We took the median relative risk ( $RR$ ) from each calculation to get the global  $RR$ . We then applied the global  $RR$  and the predicted proportions of HIV-TB cases among all TB cases to get the fractions of HIV-TB deaths among all TB deaths for all locations and years. Location-year-specific HIV-TB deaths were then calculated using the following equation:

$$death_{HIVTB} = \frac{D}{1-D} death_{TB}$$

where  $death_{TB}$  is TB deaths among HIV negative individuals were location-year specific deaths from the CODEm TB no-HIV model. Finally, we applied the age-sex pattern of the HIV mortality estimates to these HIV-TB deaths to generate location-year-age-sex-specific HIV-TB deaths. As the HIV-TB deaths were estimated based on the fraction of HIV-TB deaths among all TB deaths, the total number of HIV-TB deaths could exceed the total number of HIV cases in some locations. To avoid this, we applied a cap of 45% on the fraction of HIV-TB deaths among HIV deaths, based on a review by Cox et al., 2010,<sup>1</sup> and a systematic review and meta-analysis by Ford et al., 2016.<sup>2</sup>

There were changes from GBD 2013 in terms of modeling strategy. In GBD 2013, we estimated the relationship between the logit-transformed fraction of HIV-TB deaths among HIV deaths and the log-transformed TB death rate in a mixed effects regression. The regression coefficients were then used to predict the fraction of HIV-TB deaths in all countries. This approach did not use all available data and also underestimated HIV-TB deaths. For GBD 2015, we made use of all available data and improved our modeling strategy as described above.

## References

- 1 Cox JA, Lukande RL, Lucas S, Nelson AM, Van Marck E, Colebunders R. Autopsy causes of death in HIV-positive individuals in sub-Saharan Africa and correlation with clinical diagnoses. *AIDS Rev* 2010; **12**: 183–94.
- 2 Ford N, Matteelli A, Shubber Z, et al. TB as a cause of hospitalization and in-hospital mortality among people living with HIV worldwide: a systematic review and meta-analysis. *J Int AIDS Soc* 2016; **19**: 20714.

## 2.8 Shock models

### Ebola

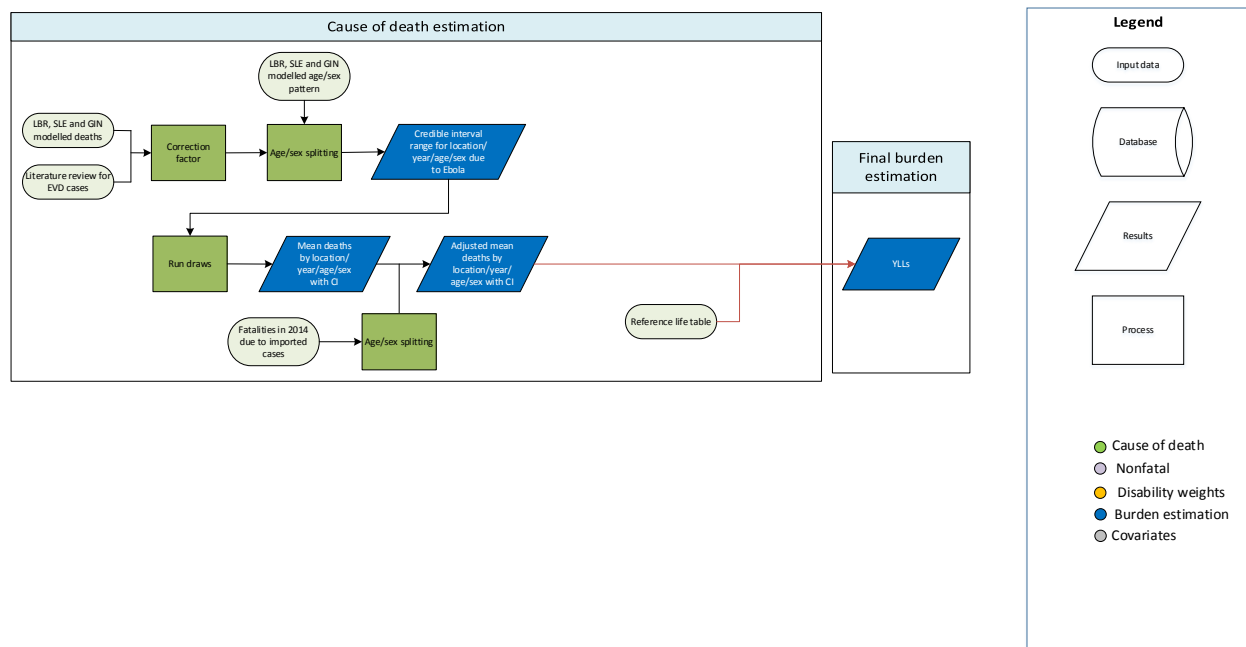

#### Input data

The input data for deaths due to Ebola virus disease (EVD) came in two forms: (i) modeled estimates for the West African outbreak from 2013 to 2015 provided by the World Health Organization (WHO) focused specifically on the three worst affected countries (Liberia, Guinea, and Sierra Leone) and (ii) literature searches for reported deaths due to EVD not captured by the West African dataset. This is further explained below:

- i. WHO estimates for Liberia, Guinea, and Sierra Leone, 2014 to 2015
  1. Researchers from Imperial College London (UK), as part of the WHO Ebola response team, provided modeled estimates for the number of fatalities that result from a given number of reported cases (provided by line lists from the WHO). This method was used in a variety of papers to generate baseline estimates of case fatality rates and other key epidemiological measures while correcting for the lag period between initially reporting a case and the final outcome of that case (whether it be death or survival). The full data cleaning and methodology are reported elsewhere.<sup>1,2</sup> Bespoke estimates were provided for GBD for Liberia, Sierra Leone, and Guinea and were stratified by age, sex, and year. Death data from Guinea ranged from February 18, 2014, until September 27, 2015, with data from Liberia ranging from March 20,

2014 to May 4, 2015, and data from Sierra Leone ranging from May 21 until September 28, 2015.

- ii. Literature searches for reported deaths due to EVD outside of Liberia, Guinea, and Sierra Leone
  1. In order to capture the small number of fatalities that occurred in countries outside of the core three mentioned above, WHO Situation Reports were consulted. Fatalities were reported in the USA (specifically Texas), Mali, and Nigeria.<sup>3</sup> All deaths occurred in 2014. Additional age and sex information could only be obtained for the death that occurred in the US.

Using a previous review of historical outbreaks,<sup>4,5</sup> original articles describing the progression of historical outbreaks were consulted. This initial review was also updated to include the 2014 outbreak that occurred in the Democratic Republic of the Congo in 2014.<sup>6</sup> This resulted in datasets describing each outbreak with variable degrees of detail; some fully describing the age and sex breakdown of all deaths [e.g.,<sup>7</sup>] and others simply providing the final total. Only confirmed or probable deaths were included; suspected EVD deaths were omitted. Outbreaks that spanned multiple years, in the absence of sufficient data providing an accurate breakdown, were apportioned between the years by evenly assigning a uniform number of deaths to each month of the outbreak's duration.

### Modeling strategy

Data on deaths resulting from imported cases from 2014 were used as specific count data as it was assumed to be an accurate representation of the cases and outbreaks in these countries, all of which were on high alert for importation of cases.<sup>8,9</sup>

The other input data were processed prior to inclusion in GBD to account for any potential underreporting of deaths. The United Nations Mission for Ebola Emergency Response surveys suggested that such underreporting of deaths ranged from 1.43 – 2x the reported number.<sup>10</sup> In order to capture this potential variation, all input data were multiplied by the lower and upper limit of this estimated correction factor; these numbers then provided the lower and upper bounds from which draw values were taken. For outbreaks where no data were supplied for age and/or sex, the pattern observed in the West African outbreak (for which there was the most comprehensive data) was used to apportion these total values.

One thousand draws were taken from a normal distribution fitted between these lower and upper bound values, which generated mean estimates stratified by age, sex, location, and year along with credible intervals for these numbers. These estimates were then adjusted by including the count data for imported cases from 2014.

Data on Ebola outbreaks prior to 2014 are sparse, and as a result many values derived from the West African outbreak were assumed to be valid for historic outbreaks as well. This may mask significant differences that exist between these outbreaks, some of which were caused by different species of *Ebolavirus*. In order to minimize this problem we chose to implement a data-driven approach – for those outbreaks where sufficiently detailed historical data could be obtained, this was used in preference to any assumed age/sex breakdown.

Similarly, we only have one estimate for potential underreporting, taken from December 2014 in Sierra Leone. It could well be that this rate varies considerably both over time within an outbreak as well as



between different outbreaks. As more studies are undertaken in the years following the peak of the outbreak, it is likely that this correction factor will become better parameterized in future GBD iterations.

## References

- 1 West African Ebola Epidemic after One Year — Slowing but Not Yet under Control. *N Engl J Med* 2015; **372**: 584–7.
- 2 Ebola Virus Disease in West Africa — The First 9 Months of the Epidemic and Forward Projections. *N Engl J Med* 2014; **371**: 1481–95.
- 3 Ebola Situation Reports. World Health Organization.
- 4 Pigott DM, Golding N, Mylne A, *et al.* Mapping the zoonotic niche of Ebola virus disease in Africa. *eLife* 2014; **3**: e04395.
- 5 Mylne A, Brady OJ, Huang Z, *et al.* A comprehensive database of the geographic spread of past human Ebola outbreaks. *Sci Data* 2014; **1**: 140042.
- 6 Maganga GD, Kapetshi J, Berthet N, *et al.* Ebola virus disease in the Democratic Republic of Congo. *N Engl J Med* 2014; **371**: 2083–91.
- 7 Rosello A, Mossoko M, Flasche S, *et al.* Ebola virus disease in the Democratic Republic of the Congo, 1976–2014. *eLife* 2015; **4**. DOI:10.7554/eLife.09015.
- 8 Fasina FO, Shittu A, Lazarus D, *et al.* Transmission dynamics and control of Ebola virus disease outbreak in Nigeria, July to September 2014. *Euro Surveill Bull Eur Sur Mal Transm Eur Commun Dis Bull* 2014; **19**: 20920.
- 9 Althaus CL, Low N, Musa EO, Shuaib F, Gsteiger S. Ebola virus disease outbreak in Nigeria: Transmission dynamics and rapid control. *Epidemics* 2015; **11**: 80–4.
- 10 Sierra Leone: Ebola emergency Weekly Situation Report No. 7. UN for Ebola Emergency Response, National Emergency Response Centre, 2014.

# Fatal Discontinuities

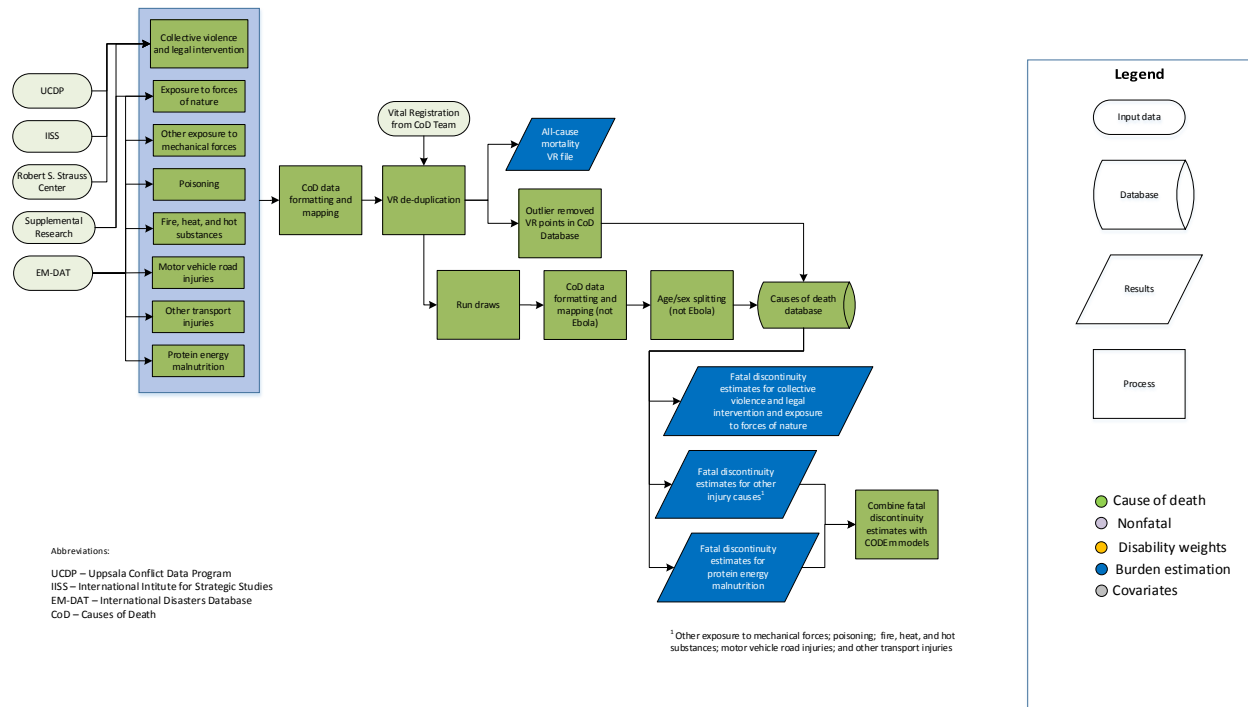

## Input data

### Collective Violence and Legal Intervention

Data for collective violence and legal intervention comes from the Uppsala Conflict Data Program (UCDP), International Institute for Strategic Studies, and Robert S. Strauss Center for International Security and Law. The table below provides details about the various datasets we utilized from these sources, the dates they were last accessed, and the years for which we used the data provided.

| <b>Data source name</b>                                            | <b>Date accessed</b> | <b>Years of data accessed</b> | <b>Type of data included</b>                                                                                                                                                                                                                                            |
|--------------------------------------------------------------------|----------------------|-------------------------------|-------------------------------------------------------------------------------------------------------------------------------------------------------------------------------------------------------------------------------------------------------------------------|
| <b>Uppsala Conflict Data Program<sup>1</sup></b>                   |                      |                               |                                                                                                                                                                                                                                                                         |
| Battles                                                            | 9/23/15              | 1989-2015                     | Armed conflict: incompatibility that concerns government and/or territory over which the use of armed force between the military forces of two parties, of which at least one is the government of a state, has resulted in at least 25 battle-related deaths each year |
| Non-state                                                          | 11/4/15              | 1989-2015                     | The use of armed force between two organized armed groups, neither of which is the government of a state, which results in at least 25 battle-related deaths each year                                                                                                  |
| One-sided                                                          | 11/3/15              | 1989-2015                     | The use of armed force by the government of a state or by a formally organized group against civilians which results in at least 25 deaths in a year                                                                                                                    |
| Africa Georeferenced Event Dataset                                 | 11/4/15              | 1989-2008                     | UCDP battles; non-state; one-sided for African countries                                                                                                                                                                                                                |
| PRIO Battles Deaths Dataset                                        | 9/23/15              | 1970-1989                     | Armed conflict (civil wars, etc.)                                                                                                                                                                                                                                       |
| <b>International Institute for Strategic Studies</b>               |                      |                               |                                                                                                                                                                                                                                                                         |
| Armed Conflict Dataset                                             | 9/25/15              | 1997-Present                  | Insurgency, Inter-state, Intra-state                                                                                                                                                                                                                                    |
| <b>Robert S. Strauss Center For International Security And Law</b> |                      |                               |                                                                                                                                                                                                                                                                         |
| Armed Conflict Location and Event Dataset (ACLED)                  | 9/15/15              | 1997-2015                     | Actions of opposition groups, governments, and militias across Africa, specifying the exact location and date of battle events, transfers of military control, headquarter establishment, civilian violence, and rioting                                                |
| Social Conflict Analysis Database (SCAD)                           | 9/15/15              | 1990-2015                     | Protests, riots, strikes, inter-communal conflict, government violence against civilians, and other forms of social conflict (covers Africa and Latin America)                                                                                                          |

Supplemental online research was conducted for recent conflicts where the databases above were not up-to-date. Where there was large variance in death estimates in recent years, we averaged estimates from all sources at the country-year level.

For country-years where multiple sources provided estimates, we prioritized sources in the following order: (1) country vital registration (VR) data, if death estimates were highest of all sources; (2) UCDP; (3) IISS; (4) country VR if death estimates were not the highest of all sources; (5) Strauss Center; (6) online supplemental research; and (7) combined average country data where applicable.

#### *Exposure to Forces of Nature and Other Injury Causes*

Data for disaster events which caused greater than 50 deaths due to exposure to forces of nature; poisonings; fire, heat, and hot substances; motor vehicle road injuries; other transport injuries; and other exposure to mechanical forces came from the Centre for Research on the Epidemiology of

Disasters' International Disaster Database (EM-DAT). Data from EM-DAT were last accessed January 3, 2016. Supplemental online research was conducted for events where EM-DAT was not up-to-date.

For country-years where multiple sources provided estimates, we prioritized sources in the following order: (1) country VR data, if death estimates were highest of all sources; (2) EM-DAT; (3) country VR if death estimates were not the highest of all sources; (4) online supplemental research. Exceptions were made where it was clear that vital registration systems had been compromised by the event being measured. In those cases, such as in the United States following Hurricane Katrina in 2005, supplemental research was prioritized over VR data.

In locations where we produced estimates at the subnational level for GBD 2015, deaths due to all fatal discontinuity causes were assigned to the relevant subnational location(s) when that information could be obtained either through the data sources mentioned above or through additional online research. If no subnational location could be found, the deaths were split proportionally by population across all subnational locations.

A systematic literature review was not used to identify input data for fatal discontinuities, though some literature sources were identified through online supplemental research.

### **Modeling strategy**

All input data for fatal discontinuity causes were run through the Causes of Death data formatting and mapping process detailed in Part 2.

#### *VR de-duplication*

For country-years where deaths due to fatal discontinuity causes were recorded in both VR and other utilized data sources, the higher of the two estimates were taken in the case of deaths due to war and collective violence and exposure to forces of nature.

For the other injury causes that also have a CODEm model, a process was established to avoid duplication of fatal discontinuity deaths in the two models. First, location-years with greater than 50 deaths due to the cause were identified. If these location-cause-years had vital registration death estimates that were greater than 40% higher than the immediately surrounding years, the identified years were reviewed. Those that represented a true diversion from the trend of VR and could be linked to a specific fatal discontinuity event were marked as outliers in the VR data and the difference between the outlier year and the average of the surrounding years was included in the relevant cause in the fatal discontinuities database. The deaths from the identified events were subtracted from the all-cause VR estimates used in the all-cause mortality estimation process.

#### *Uncertainty analysis for input and draw-level input to age-sex splitting*

Uncertainty intervals for deaths due to collective violence and legal intervention were generated using UCDP high and low death estimates. In cases where low and high estimates are not provided by the original source, regional average relative uncertainty interval by type of fatal discontinuity is applied to the mean input that is available.

We assumed a normal distribution using the mean deaths and standard deviation based on high and low estimates. The standard deviation was capped at the mean divided by 1.96 in order to ensure that 95%

of the 1,000 draws generated were greater than 0. Any negative draws were dropped from final calculations of means and uncertainty intervals.

#### *Age-sex splitting*

All compiled data were run through the causes of death age-sex splitting process detailed in Part 2.

#### *Changes from GBD 2013*

Only collective violence and legal intervention and exposure to forces of nature were modeled as fatal discontinuities (previously called mortality shocks) in GBD 2013. GBD 2015 also includes fatal discontinuity models for protein energy malnutrition (previously included as “famine” in exposure to forces of nature) and additional injury models (motor vehicle road injuries; other transport injuries; exposure to fire, heat, and hot substances; poisoning; and other exposure to mechanical forces). These new causes (unlike collective violence and legal intervention and exposure to forces of nature) are also modeled in CODEm and thus have two models (a shock model and a CODEm model) that are combined to produce the final estimates of deaths for these causes.

The VR de-duplication process and the use of the causes of death age-sex splitting process for fatal discontinuity causes were added in GBD 2015.

#### **Reference**

1 UCDP/PRIO Armed Conflict Dataset Codebook. Uppsala Conflict Data Program (UCDP); Centre for the Study of Civil Wars, International Peace Research Institute, Oslo (PRIO), 2013.

## 2.9 Pathogen counterfactuals

### Lower Respiratory Infections

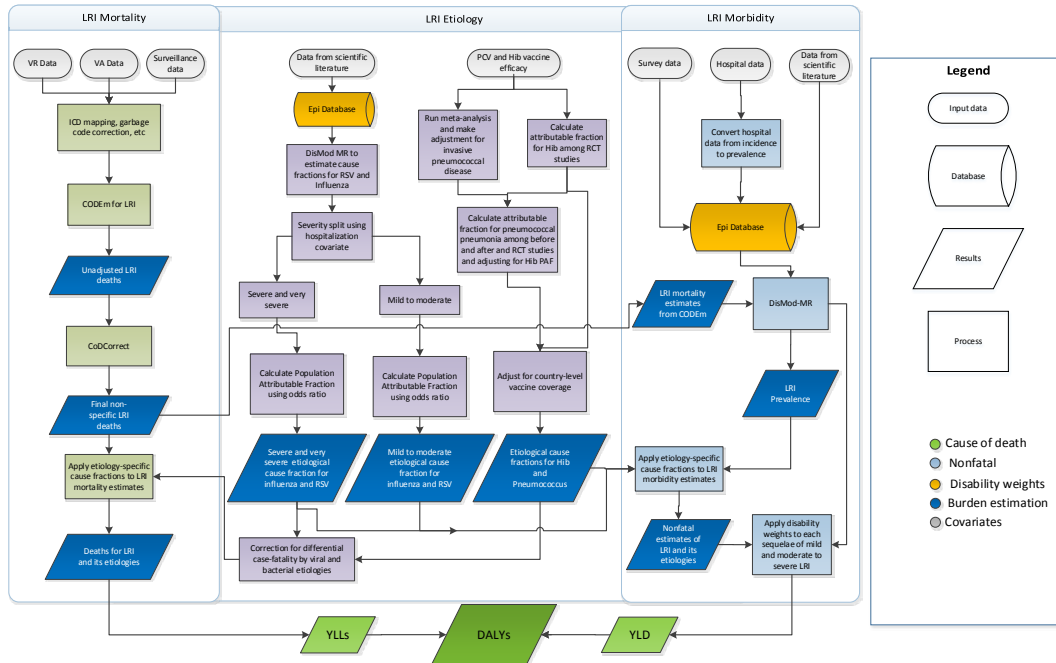

#### Input data

Lower respiratory infection (LRI) mortality was estimated in CODem. We estimated LRI mortality separately for males and females and for children under 5 years and older than 5 years. We used all available data from vital registration systems and verbal autopsy. We checked for and excluded outliers from our data by country or region. We also excluded ICD9-coded mortality data in Sri Lanka (1982, 1987–1992), ICD9-coded neonatal mortality data in Guatemala (1980, 1981, 1984, 2000–2004), and Civil Registration System data in many Indian states (1986–1995).

We conducted a systematic review of scientific literature for the proportion of LRI that tested positive for influenza and respiratory syncytial virus (RSV). We had inclusion criteria to select studies that were published between January 1990 and June 2015, studies that had a sample size of at least 100, studies that were at least one year in duration, and studies describing lower respiratory infections, pneumonia, or bronchiolitis as the case definition. During our literature review from January 2012 through June 2015, we identified 1,164 studies, of which 137 met our inclusion criteria and were included. We excluded studies that described pandemic H1N1 influenza solely and studies that used influenza-like illness as the case definition. We assigned an age range based on the prevalence-weighted mean age of LRI in the appropriate year/sex/location if the ages of the study participants were not reported. Overall, we included 471 data points for influenza and 362 data points for RSV.

We also conducted a systematic literature review of studies on the Hib vaccine and PCV effectiveness studies against X-ray-confirmed pneumonia and against pneumococcal and Hib disease until January 2016. For PCV studies, we also extracted, if available, the distribution of pneumococcal pneumonia serotypes and the serotypes included in the PCV used in the study. We did not include any new studies for Hib, and three new studies were included for pneumococcal pneumonia since GBD 2013. We excluded observational and case-control studies due to implausibly high vaccine efficacy estimates. Hib trial data were exclusively from children <5 years so we did not include the effect of Hib on ages over 5 years of age. PCV trial data are also frequently limited to younger age populations. To understand the contribution of pneumococcal pneumonia in older populations, we also included PCV efficacy studies that used before-after approaches to understand the impact of introduction of PCV at the population level.

For influenza and RSV, we included several study-level covariates in these models. For these covariates, we extracted data from studies included in the literature review if the study used diagnostic PCR, if the sample was from hospitalized cases, and if the study investigated RSV or influenza exclusively from other etiologies.

We used country-level covariates to inform our CODEm models. We included the following covariates in our LRI models: diphtheria-tetanus-pertussis vaccine coverage, years of education per capita, health system access, income per capita, prevalence of children malnutrition (<2 standard deviations below global mean of weight for age), prevalence of exposure to indoor air pollution (solid fuel use), outdoor air pollution level of PM<sub>2.5</sub>, smoking prevalence, pneumococcal conjugate vaccine (PCV) coverage, *Haemophilus influenzae* type B (Hib) vaccine coverage, access to improved water, access to improved sanitation, and Socio-Demographic Index.

## **Modeling strategy**

We evaluated our LRI cause of death models using in and out of sample predictive performance. We estimated LRI etiologies separately from overall LRI mortality using two distinct counterfactual modeling strategies to estimate population attributable fractions (PAFs), described in detail below. We did not attribute etiologies to neonatal pneumonia deaths due to a dearth of reliable data in this age group. We calculated uncertainty of our PAF estimates from 1,000 draws of each parameter using normal distributions in log space.

We modeled the proportion data using the meta-regression tool DisMod-MR to estimate the proportion of LRI cases that are positive for influenza and RSV, separately, by location/year/age/sex.

We calculated the population attributable fraction (PAF) from the proportion of severe LRI cases positive for influenza and RSV. We assumed that hospitalized LRI cases are a proxy of severe cases. We used the following formula to estimate PAF:<sup>1</sup>

$$PAF = \text{Proportion} * (1-1/OR)$$

Where *Proportion* is the proportion of LRI cases that test positive for influenza or RSV and *OR* is the odds ratio of LRI given the presence of the pathogen. We used an odds ratio of 5.1 (3.19 – 8.14) for influenza and 9.79 (4.98 – 19.27) for RSV from a recently published meta-analysis.<sup>2</sup> These odds ratios are marginally different from those used in GBD 2013.

As the case-fatality of viral causes of pneumonia is lower than for bacterial causes, we adjusted for differential case-fatality by determining the etiological fractions for mortality attributable to RSV and influenza (below table). We measured the etiologic fractions by applying a relative case-fatality adjustment based on in-hospital case-fatality, which we coded to specific pneumonia etiologies. Hospital admissions data of this type were limited to data from the USA, Austria, Brazil, and Mexico. We generated the pooled estimate of the case-fatality differential between bacterial (pneumococcus, Hib) and viral etiologies (RSV, influenza) using DisMod-MR.

For *Streptococcus pneumoniae* (pneumococcal pneumonia) and *Haemophilus influenzae* type B (Hib), we calculated the population attributable fraction using a vaccine probe design.<sup>3,4</sup> The ratio of vaccine effectiveness against nonspecific pneumonia to pathogen-specific disease represents the fraction of pneumonia cases attributable to each pathogen.

To estimate the PAF for Hib and pneumococcal pneumonia, we calculated the ratio of vaccine effectiveness against nonspecific pneumonia to pathogen-specific pneumonia (Equations 1 and 3). We were able to get a study-level estimate of PAF from a meta-analysis of these ratios. We then adjusted this estimate by vaccine coverage and expected vaccine performance to estimate country- and year-specific PAF values (Equations 2 and 4). For pneumococcal pneumonia, we adjusted the PAF even further using the final Hib PAF estimate and by vaccine serotype coverage. Finally, we used an age distribution of PAF modeled in DisMod to determine the PAF by age.

$$1) PAF_{Base} = 1 - \frac{VE}{VE_i}$$

$$2) Hib\ PAF = PAF_{Base} * \frac{(1-Cov_{Hib}*VE_{Optimal})}{(1-PAF_{Base}*Cov_{Hib}*VE_{Optimal})}$$

Where *VE* is the vaccine efficacy against nonspecific pneumonia, *VE<sub>i</sub>* is the vaccine efficacy against invasive Hib disease, *Cov<sub>Hib</sub>* is the country-level coverage of Hib vaccine and *VE<sub>Optimal</sub>* is the assumed optimal vaccine effectiveness (0.8, assumed). Optimal vaccine effectiveness is an adjustment for imperfect vaccine performance. We only used randomized-controlled trials (RCTs) in the Hib PAF estimation.



$$3) PAF_{Base} = 1 - \frac{VE_{Pneumonia} * (1 - PAF_{Hib} * VE_{Hib\ Optimal})}{VE_{Pneumococcus} * Cov_{Serotype}}$$

$$4) PAF_{Final} = \frac{PAF_{Base} * (1 - Cov_{PCV} * VE_{PCV\ Optimal})}{(1 - PAF_{Hib} * Cov_{Hib} * VE_{Hib\ Optimal}) * \left( 1 - \frac{PAF_{Base} * Cov_{PCV} * VE_{PCV\ Optimal}}{(1 - PAF_{Hib} * Cov_{Hib} * VE_{Hib\ Optimal})} \right)}$$

Where  $VE_{Pneumonia}$  is the vaccine efficacy against nonspecific pneumonia,  $PAF_{Hib}$  is the final PAF for Hib,  $VE_{Hib\ Optimal}$  is the optimal Hib effectiveness (0.8, assumed),  $VE_{Pneumococcus}$  is the vaccine efficacy against serotype-specific pneumococcal pneumonia,  $Cov_{Serotype}$  is the serotype-specific coverage,  $Cov_{PCV}$  is the vaccine coverage for region specific serotypes,  $VE_{PCV\ Optimal}$  is the optimal vaccine effectiveness (0.8, assumed), and  $Cov_{Hib}$  is the Hib coverage by country.

For Hib, we assumed that the vaccine efficacy against invasive Hib disease is the same against Hib pneumonia. For pneumococcal pneumonia, a recent study in adults found that the vaccine efficacy against invasive pneumococcal disease may be significantly higher than against pneumococcal pneumonia.<sup>5</sup> We used this ratio to adjust estimates of vaccine efficacy against invasive pneumococcal disease from other studies. However, recognizing that the study is unique in that it uses a urine antigen test among adults, we added uncertainty around our adjustment using a wide uniform distribution (0.3-1.0). This is an important change from our etiology estimation in GBD 2013.

There are several important differences from the approach to LRI etiology estimation in GBD 2015 compared to GBD 2013. There are new data used in the CODEm models and in the LRI proportion DisMod models. Most significantly, we introduced the adjustment of pneumococcal conjugate vaccine efficacy. Most studies report the vaccine efficacy against invasive, serotype-specific pneumococcal disease; however, a recent study found that this may be an overestimate of the vaccine efficacy against serotype-specific pneumococcal pneumonia.<sup>5</sup> Using a large range of uncertainty, we corrected vaccine efficacy estimates against invasive disease to our serotype-specific pneumonia case definition. This has increased the estimates of pneumococcal pneumonia mortality in a meaningful way.

Table: The median values for the ratio of viral to bacterial pneumonia case fatality ratio by age is shown. These estimates are modeled using hospital-based, ICD-coded admissions and mortality for etiology-specified pneumonia. Values in parentheses represent 95% Uncertainty Interval.

| Age group      | Ratio             |
|----------------|-------------------|
| Early Neonatal | 0.34 (0.15-0.53)  |
| Late Neonatal  | 0.34 (0.15-0.53)  |
| Post Neonatal  | 0.34 (0.15-0.53)  |
| 1 to 4         | 0.28 (0.14-0.42)  |
| 5 to 9         | 0.31 (0.1-0.52)   |
| 10 to 14       | 0.33 (0.17-0.49)  |
| 15 to 19       | 0.37 (0.15-0.59)  |
| 20 to 24       | 0.46 (-0.08-1)    |
| 25 to 29       | 0.44 (0.07-0.82)  |
| 30 to 34       | 0.46 (0.13-0.78)  |
| 35 to 39       | 0.5 (0.11-0.89)   |
| 40 to 44       | 0.61 (-0.23-1.45) |
| 45 to 49       | 0.5 (0.1-0.89)    |
| 50 to 54       | 0.44 (0.18-0.71)  |
| 55 to 59       | 0.42 (0.13-0.71)  |
| 60 to 64       | 0.42 (0-0.85)     |
| 65 to 69       | 0.39 (0.13-0.65)  |
| 70 to 74       | 0.38 (0.17-0.58)  |
| 75 to 79       | 0.37 (0.16-0.58)  |
| 80 plus        | 0.35 (0.2-0.5)    |

## References

- 1 Miettinen OS. Proportion of disease caused or prevented by a given exposure, trait or intervention. *Am J Epidemiol* 1974; **99**: 325–32.
- 2 Shi T, McLean K, Campbell H, Nair H. Aetiological role of common respiratory viruses in acute lower respiratory infections in children under five years: A systematic review and meta-analysis. *J Glob Health* 2015; **5**: 010408.
- 3 Feikin DR, Scott JAG, Gessner BD. Use of vaccines as probes to define disease burden. *Lancet Lond Engl* 2014; **383**: 1762–70.

4 O'Brien KL, Wolfson LJ, Watt JP, *et al.* Burden of disease caused by *Streptococcus pneumoniae* in children younger than 5 years: global estimates. *Lancet Lond Engl* 2009; **374**: 893–902.

5 Bonten MJM, Huijts SM, Bolkenbaas M, *et al.* Polysaccharide conjugate vaccine against pneumococcal pneumonia in adults. *N Engl J Med* 2015; **372**: 1114–25.

## Diarrheal diseases

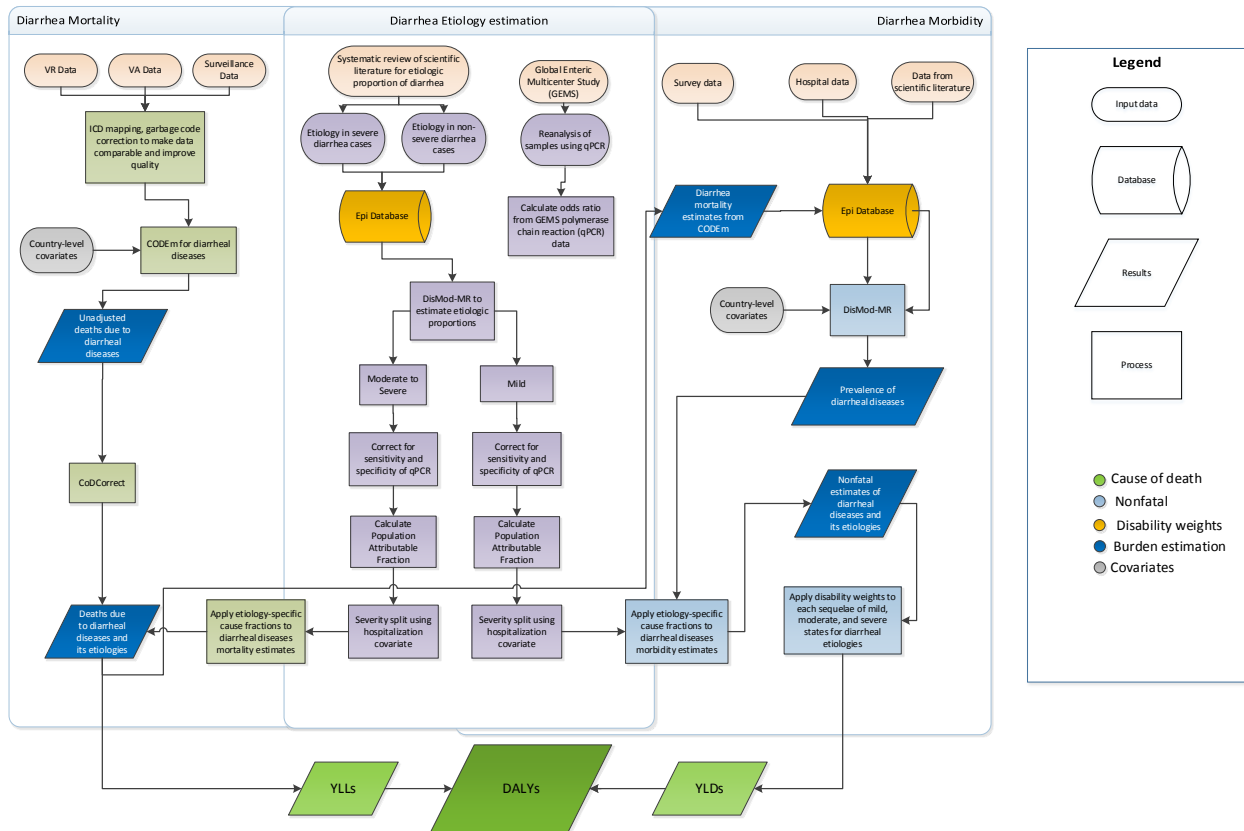

### Input data

Diarrheal disease mortality was estimated in CODEm. We estimated diarrhea mortality separately for males and females and for children under 5 years and older than 5 years. We used all available data from vital registration systems and verbal autopsy. We checked for and excluded outliers from our data by country or region. We also excluded early neonatal mortality data in the Philippines (1994–1998) and India Civil Registration System data for several states (1986–1995).

We conducted a systematic literature review for the proportion of diarrhea cases that tested positive for the pathogens listed above. We updated our review of literature to include studies published between January 2012 and May 2015. We used inclusion criteria of diarrhea as the case definition, studies with a sample size of at least 100, and studies with at least one year of follow-up. We excluded studies that reported on diarrheal outbreaks exclusively and those that used acute gastroenteritis with or without diarrhea. We identified 2,847 studies, of which 152 met our criteria of inclusion and were included. We extracted data points for location, sex, year, and age. We assigned an age range based on the prevalence-weighted mean age of diarrhea in the appropriate year/sex/location if the age of the study participants was not reported.

Our literature review extracted the proportion of any enteropathogenic *Escherichia coli* (EPEC) without differentiating between typical (tEPEC) and atypical (aEPEC). In order to be consistent with the odds ratios that we obtained, we adjusted our proportion estimates of any EPEC to typical EPEC only. This adjustment was informed by a subset of our literature review that reported both atypical and typical EPEC. We estimated a ratio by super-region of tEPEC to any EPEC and adjusted our proportion estimates accordingly. We found that the majority of EPEC diarrhea cases were positive for atypical EPEC, consistent with other published work.<sup>1</sup>

We used the Global Enteric Multicenter Study (GEMS), a seven-site, case-control study of moderate-to-severe diarrhea in children under 5 years,<sup>2</sup> to calculate odds ratios for the diarrheal pathogens. We analyzed raw data for a systematic reanalysis, representative of the distribution of cases and controls by age and site, of roughly half of the 22,000 original GEMS samples that were tested for the presence of pathogen using quantitative polymerase chain reaction (qPCR).<sup>3</sup>

We used country-level covariates to inform our CODEm models. We included covariates for years of education per capita, income per capita, prevalence of malnutrition (weight for age z score <2 standard deviations), population density above 1,000 people per square kilometer, population density below 150 people per square kilometer, access to improved sanitation, access to improved water, Socio-Demographic Index, and rotavirus vaccine coverage.

We modeled *Vibrio cholerae* independently from the other etiologies because of its epidemic tendency. We conducted a systematic review of literature for studies published between January 1980 and June 2015 that reported the proportion of diarrhea cases that tested positive for cholera or the case fatality of cholera. We excluded studies specifically about outbreaks and with less than one year of follow-up.

We also modeled *Clostridium difficile* independently from the etiologies because it was not included as a pathogen in GEMS. We conducted a systematic literature review for the prevalence and incidence of *C. difficile* between January 1990 and May 2015. We used inpatient and outpatient hospital visits coded for *C. difficile* as our incidence data. However, nearly all of the hospital data came from Western countries.

### **Modeling strategy**

We evaluated our diarrheal disease cause of death models using in and out of sample predictive performance. We estimated diarrheal disease etiologies separately from overall diarrhea mortality using a counterfactual strategy for enteric adenovirus, *Aeromonas*, *Entamoeba histolytica* (amoebiasis), *Campylobacter enteritis*, cryptosporidiosis, typical enteropathogenic *Escherichia coli* (t-EPEC), enterotoxigenic *Escherichia coli* (ETEC), norovirus, non-typhoidal salmonella infections, rotavirus, and *Shigella*. *Vibrio cholerae* and *Clostridium difficile* were modeled separately.

We dichotomized the continuous qPCR test result using the value of the cycle threshold (Ct) that accurately discriminated between cases and controls. We used the lower Ct value that

represented the smallest false positive samples (positive in non-diarrhea samples) when we had multiple Ct values for the cutpoint. The Ct values range from 0 to 35 cycles representing the relative concentration of the target gene in the stool sample. A low value indicates a higher concentration of the pathogen while a value of 35 indicates the absence of the target in the sample.

The case definition for each pathogen is a Ct value that is below the established cutoff point. We used a mixed effects conditional logistic regression model to calculate the odds ratio by age for each of our pathogens.

We modeled the proportion data using the meta-regression tool DisMod-MR to estimate the proportion of positive diarrhea cases for each separate etiology by location/year/age/sex and to adjust for the covariates.

The population attributable fraction (PAF) was calculated from the proportion of severe diarrhea cases that are positive for each etiology. This is a counterfactual approach, meaning that the PAF represents the relative reduction in diarrhea mortality if there was no exposure to a given etiology. As diarrhea can be caused by multiple pathogens and the pathogens may co-infect, PAFs can overlap and add up to more than 100%. We calculated the PAF from the proportion of severe diarrhea cases that are positive for each etiology. We assumed that hospitalized diarrhea cases are a proxy of severe and fatal cases. We defined severe cases as those presenting with severe dehydration, sunken eyes, convulsion, shock, and coma.<sup>4</sup> We used the following formula to estimate PAF:<sup>5</sup>

$$PAF = Proportion * (1 - \frac{1}{OR})$$

Where *Proportion* is the proportion of diarrhea cases positive for an etiology and *OR* is the odds ratio of diarrhea given the presence of the pathogen. We used the estimated sensitivity and specificity of the laboratory diagnostic technique used in the GEMS study compared to the qPCR case definition to adjust our proportion before we computed the PAF:<sup>6</sup>

$$Proportion_{True} = \frac{(Proportion_{Observed} * Specificity - 1)}{(Sensitivity + Specificity - 1)}$$

We used this correction for the “proportion” to account for the fact that the proportions we used are based on a new test that is not consistent with the case definition from GEMS (qPCR versus GEMS conventional laboratory testing for pathogens).

For cholera specifically, we used the literature review to estimate expected number of cholera cases for each country-year using the incidence of diarrhea, estimated using DisMod-MR, and the proportion of diarrhea cases that are positive for cholera. We assigned cholera PAF using odds ratios from the qPCR results. We compared this expected number of cholera cases to the number reported to the World Health Organization.<sup>7</sup> We modeled the underreporting fraction to correct the cholera case notification data for all countries. We used the age-specific

proportion of positive cholera samples in DisMod and our incidence estimates to predict the number of cholera cases for each sex/year/location. Finally, we modeled the case fatality ratio of cholera using DisMod-MR and to estimate the number of cholera deaths.

For *C. difficile*, we modeled incidence and mortality in DisMod-MR for each age, sex, year, location. DisMod-MR is a Bayesian meta-regression tool that uses spatio-temporal information as priors to estimate prevalence, incidence, remission, and mortality for *C. difficile* infection. DisMod-MR uses a compartmental model to relate prevalence, incidence, remission, and mortality. We set remission in our model to 1 month.

There are several key updates to the approach to diarrhea etiology estimation in GBD 2015 compared to GBD 2013. There are new data used in the CODEm models and in the diarrhea proportion DisMod models. We also introduced qPCR diagnostic results from a retest of a systematic sample by age and site from the original GEMS stool samples. The qPCR diagnostic is more sensitive in detecting some pathogens, particularly bacterial ones, than the conventional laboratory test diagnostics used in the primary GEMS analysis and in GBD 2013. These qPCR results impact the odds ratios of diarrhea given pathogen detection and also the exposure which is the proportion of diarrhea cases positive for each pathogen. We adjusted the proportion estimates from the literature review by the sensitivity and specificity of the laboratory diagnostics to the new qPCR case definition to be consistent with the odds ratios. In general, this increased the attributable fractions for each pathogen.

## References

- 1 Ochoa TJ, Barletta F, Contreras C, Mercado E. New insights into the epidemiology of enteropathogenic Escherichia coli infection. *Trans R Soc Trop Med Hyg* 2008; **102**: 852–6.
- 2 Kotloff KL, Nataro JP, Blackwelder WC, *et al.* Burden and aetiology of diarrhoeal disease in infants and young children in developing countries (the Global Enteric Multicenter Study, GEMS): a prospective, case-control study. *Lancet Lond Engl* 2013; **382**: 209–22.
- 3 Liu J, Gratz J, Amour C, *et al.* A laboratory-developed TaqMan Array Card for simultaneous detection of 19 enteropathogens. *J Clin Microbiol* 2013; **51**: 472–80.
- 4 World Health Organization, Department of Child and Adolescent Health and Development. Handbook IMCI integrated management of childhood illness. Geneva: World Health Organization, Department of Child and Adolescent Health and Development, 2005.
- 5 Miettinen OS. Proportion of disease caused or prevented by a given exposure, trait or intervention. *Am J Epidemiol* 1974; **99**: 325–32.
- 6 Reiczigel J, Földi J, Ozsvári L. Exact confidence limits for prevalence of a disease with an imperfect diagnostic test. *Epidemiol Infect* 2010; **138**: 1674–8.

7 World Health Organization. Global Health Observatory data repository: Cholera.  
<http://apps.who.int/gho/data/node.main.174?lang=en> (accessed April 20, 2016).



## Part 4: Central Computation

### 1. CodCorrect

#### 1.1 Objective of CodCorrect

As mentioned in the main text, the Causes of Death models are cause-specific. As such, there is no guarantee that the sum of these models will equal the results of the all-cause mortality estimates or that model results of child causes add up to the parent model results. The CoDCorrect process is used to make the Causes of Death and all-cause mortality estimates internally consistent using a very simple algorithm.

#### 1.2 Algorithm and levels

The core algorithm remains the same as it did in GBD 2013. The equation can be written as follows:

$$CD_{lyasjd} = D_{lyasjd} \left( \frac{PD_{lyasjd}}{\sum_{j=1}^{j=k} D_{lyasjd}} \right)$$

Where  $CD_{lyasjd}$  is the corrected number of deaths for a location  $l$ , year  $y$ , age  $a$ , sex  $s$ , cause  $j$ , and draw  $d$ .  $PD_{lyasjd}$  is the parent cause deaths for a location  $l$ , year  $y$ , age  $a$ , sex  $s$ , cause  $j$ , and draw  $d$ .  $D_{lyasjd}$  is the uncorrected number of deaths estimated from a cause-specific model for a location  $l$ , year  $y$ , age  $a$ , sex  $s$ , cause  $j$ , and draw  $d$ .

The CoDCorrect process starts by rescaling the Level 1 causes to match the all-cause mortality estimates (which is used for  $PD_{lyasjd}$  in the above equation). Level 2 causes are then rescaled to their corrected parent causes. This continues until all levels of the hierarchy have been rescaled. Causes and their levels within the CoDCorrect hierarchy can be found in Appendix Table 19.

Unlike in GBD 2013, HIV is not included in the CoDCorrect process for GBD 2015. To account for this change, Level 1 CoDCorrect causes are rescaled to HIV-deleted mortality estimates which are produced as part of the mortality and HIV estimation process. Results from the GBD version of Spectrum are added to the post-CoDCorrect death estimates, along with fatal discontinuities and imported cases, to generate the full set of death estimates.

#### 1.3 Diagnostic results of CodCorrect by cause and location

For more detail on diagnostic results of CodCorrect by cause and location see Appendix Table 20.

### 2. Years of Life Lost (YLLs) calculation

Years of life lost due to premature mortality (YLLs) were computed for 596 geographies and 36 years. The YLL is a metric that is computed by multiplying the number of estimated deaths by the standard life expectancy at age of death. The metric therefore highlights premature deaths by applying a larger weight to deaths that occur at younger age groups. We propagated uncertainty from CoDCorrected deaths for all demographics. The core equation can be written as follows:

$$YLL = \sum_{c=1, a=0, s=1}^{\infty} d_{cas} e_a$$

### 3. Socio-Demographic Index (SDI) analysis

#### 3.1 Development of revised SDI indicator

The Socio-Demographic Index (SDI) was calculated using the Human Development Index (HDI) methodology, wherein an index value was determined for each covariate input (log lag dependent income per capita (LDI), average educational attainment in the population over age 15, and total fertility rate (TFR)):

$$I_{cly} = \frac{(C_{ly} - \min(C))}{(\max(C) - \min(C))}$$

Where  $I_{cly}$  – the index for covariate  $C$ , location  $l$ , and year  $y$  – is equal to the difference between the value of that covariate in that location-year and the minimum observed value of the covariate in any location over the time interval divided by the observed range. An additional innovation for GBD 2015 was to incorporate subnational locations where estimated (resulting in 519 unique administrative units) for the entire estimation period of 1980 to 2015. The Socio-Demographic Index is then the geometric mean of these three indices.

For LDI and TFR, we noted diminishing gains in life expectancy at birth and 5q0 at the higher and lower terminals, respectively. Due to the significance of these values in indexing, we aimed to identify the point at which increasing income or reducing fertility no longer resulted in improved child mortality or life expectancy. We tested various restrictions, and found that capping LDI at 60,000 and setting a TFR floor at 1 resulted in improved correlations with resultant health indicators.

We further aimed to validate the use of SDI by regressing it in a variety of forms against life expectancy at birth, 5q0, 35q15, and 20q50. We found that SDI generally is as capable of predicting these demographic indicators as the previous SDS, and also as the inputs. We also found that in incorporating year, we did not substantially reduce the coefficients for SDI (Appendix Table 24). Additionally, in testing lags of 2-10 years, we found the version with no lag to be the most predictive (Appendix Table 23).

#### 3.2 Age-sex-specific relationships between vigintile and death rates

In order to evaluate the relationship between SDI and mortality, we fit a simple least-squares regression using a smoothing spline on SDI for every cause in levels 1, 2, and 3 of the GBD cause hierarchy:

$$\ln(m_{l,y,a,s,c}) = \sum_{i=0}^{d+k} \beta_i B_{i,d}(SDI) + \gamma_U + \gamma_E + \gamma_C + \gamma_O + \varepsilon_{l,y,a,s,c}$$

where:

- $\ln(m_{l,y,a,s,c})$  is the log mortality rate in location  $l$  and year  $y$ , and for age  $a$ , sex  $s$ , and cause  $c$
- $\sum_{i=0}^{d+k} \beta_i B_{i,d}(SDI)$  is resultant parametric curve, of degree  $d$  and interior knots  $k$ , of a linear combination of basis splines  $B_{i,d}(SDI)$
- $\gamma_U$  is a dummy variable for the United States
- $\gamma_E$  is a dummy variable for the GBD region Eastern Europe
- $\gamma_C$  is a dummy variable for the GBD region Central Asia
- $\gamma_O$  is a dummy variable for the GBD region Oceania
- $\varepsilon_{l,y,a,s,c}$  is the error term for location  $l$  and year  $y$ , and for age  $a$ , sex  $s$ , and cause  $c$

We ran regressions separately by age, sex, and cause, using all location-years. Dummy variables were included for locations that were identified in modeling to skew fit due to significant deviation from levels of mortality observed elsewhere at similar levels of SDI. Because of the inclusion of 51 states and the District of Columbia, the United States collectively had an undue influence on the shape of the relationship, so a separate dummy variable was included for the U.S. Because of the mortality crisis in Eastern Europe and Central Asia after the collapse of the Soviet Union, we included a dummy variable to adjust for the mean difference in these regions.

We used the same modeling set up but used the logit of the share of population in each age group as the dependent variable to estimate a smoothed relationship between population age-structure and SDI. Predictions for each age group at each level of SDI were rescaled to sum to 100%.

### 3.3 Computation of summary measures ASDR, life expectancy, etc.

Due to the more reliable estimation at more aggregate levels of cause specificity, we imposed a top-down hierarchical scaling scheme, in which the level 1 causes were scaled to the predictions for all-cause mortality, then level 2 causes were scaled to their scaled level 1 parents, and once more for level 3 to level 2. Having a complete set of age-specific mortality rates, we were then able to produce a full set of age-standardized death rates for every SDI level. We evaluated this relationship at each .01 value of SDI. Using the predicted age-specific death rates and predicted population structure at each single unit level of SDI, we computed the all-age death rates expected at each level. Age-specific all-cause mortality rates were used to construct an abridged life table for each single unit value of SDI from .01 to 0.99. Using the abridged life table, we computed life expectancy and probability of death for ages 0 to 5 (5q0), 15 to 50 (35q15), and 50 to 70 (20q50). Additionally, this provided a mean age at death for each GBD age group, allowing for implementation of the GBD life standard to calculate expected years of life lost (YLLs) by cause, age, sex, and SDI level.

## 4. Calculation of the population age standard

The World Health Organization (WHO) last released a global age standard in 2001. The world has experienced substantial change in global demography since then, inciting the need for a new standard population for computing age-standardized rates. We calculated a new global age standard for GBD

2013. This same standard was used for GBD 2015. The paragraph below explains how we created this new age standard.

The old WHO standard used population data from the United Nations Population Division's World Population Prospects (WPP) 1998 revision. It was calculated using the non-weighted average across all countries of each age-specific population percentage in each 5-year age group up to the terminal group of 100+, using estimates from the years 2000-2025. We mirrored this technique with three key adaptations: (1) we used population data from the WPP 2012 revision for years 2010-2035; (2) we used the interpolated population in age group 0-1 provided in the WPP 2012 revision to separate ages 0-1 and 1-4; and (3) we applied the non-weighted mean proportion across countries of populations in the early neonatal (0-6 days), late neonatal (7-27 days), and post neonatal (28-364 days) age groups from the GBD 2013 study in years 2010-2013 to the new age 0-1 standard to get standard populations in these age groups. This new standard reflects an up-to-date age structure that facilitates more relevant comparisons between countries when computing age-standardized rates.

## 5. SEV scalar covariates

The "SEV scalar" covariates used in various models are created from the Summary Exposure Variables (SEV). For a given cause, these reflect the average exposure to all of the risk factors related to that cause. SEVs are calculated using the following formula:  $1 / (1 - \text{PAF})$ , where PAF is the population attributable fraction. They are log-transformed. In cause of death models, the SEV covariate allows a modeler to reflect the exposure of all GBD risks for a cause in a single summary variable rather than using exposure to each of the individual risks, separately.

## Part 5. Data sources and abbreviations

### Data input sources

GBD 2015 incorporated a large number and wide variety of input sources to estimate mortality, causes of death and illness, and risk factors for 195 countries and territories from 1990-2015. These input sources are accessible through an interactive citation tool available in IHME's GHDx.

Users can retrieve citations for a specific GBD component, cause or risk, and geography by choosing from the available selection boxes. They can then view and access GHDx records for input sources and export a CSV file that includes the GHDx metadata, citations, and information about where the data were used in GBD. Additional metadata for each input source are available through the citation tool, as required by the GATHER statement.

The citation tool is accessible through the GHDx at <http://ghdx.healthdata.org/global-burden-disease-study-2015>.

### List of abbreviations

5q0: probability of death from birth to age 5 years

20q50: probability of death from age 50 years to 70 years

35q15: probability of death from age 15 years to 50 years

45q15: probability of death from age 15 years to 60 years

ART: antiretroviral therapy

BTL: basic tabulation list

CBH: complete birth histories

CDR: crude death rates

CHERG: Child Health Epidemiology Research Group

CKD: chronic kidney disease

CKD-DM: chronic kidney disease deaths attributable to diabetes

COD: causes of death

CODEm: cause of death ensemble modeling

COPD: chronic obstructive pulmonary disease

CR: cancer registry

CRS: Civil Registration System

CVD: cardiovascular disease

DALY: disability-adjusted life year

DSP: Disease Surveillance Points

ELISA: enzyme-linked immunosorbent assay

EPEC: enteropathogenic *E. coli*

EPP: Estimation and Projection Package

ETEC: enterotoxigenic *E. coli*

GATHER: Guidelines for Accurate and Transparent Health Estimates Reporting

GBD: Global Burden of Disease

GEMS: Global Enteric Multicenter Study

Hib: *Haemophilus influenzae* type B

HIV CDR: Crude death rate due to HIV/AIDS

IARC: International Agency for Research on Cancer

ICD: International Classification of Disease

IHD: ischemic heart disease

LDI: lag distributed income per capita

LRI: lower respiratory infection

MAP: Malaria Atlas Project

MCCD: Medical Certification of Causes of Death

MCEE: Maternal and Child Epidemiology Estimation group

MI: mortality/incidence ratio

MM: maternal mortality

MMR: maternal mortality ratio

MMS: Maternal Mortality Surveillance

NCD: non-communicable disease

PAF: population-attributable fraction

PMTCT: prevention of mother-to-child transmission

RMSE: root mean square error

RSV: respiratory syncytial virus

SBH: summary birth history

SCD(R): Survey of Causes of Death (Rural)

SDI: Socio-Demographic Index

SEER: Surveillance, Epidemiology, and End Results Program

SRS: Sample Registration System

ST-GPR: spatiotemporal Gaussian process regression

TAC: TaqMan Array Card

TB: tuberculosis

UI: uncertainty interval

UN: United Nations

VA: verbal autopsy

VR: vital registration

WHO: World Health Organization

YLD: years lived with disability

YLL: years of life lost

Appendix Figure 1. Number of all-cause mortality data sources by country, 1950–2015

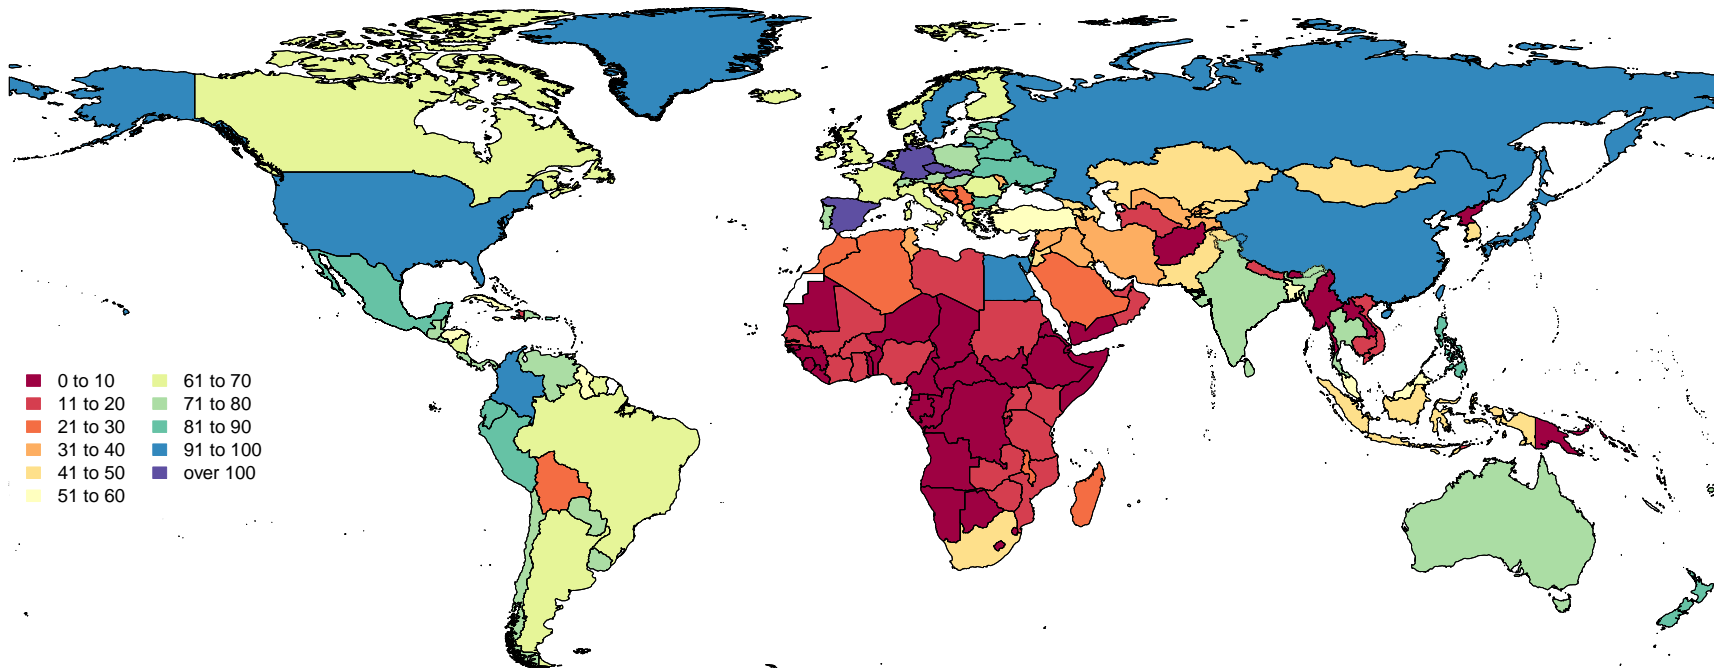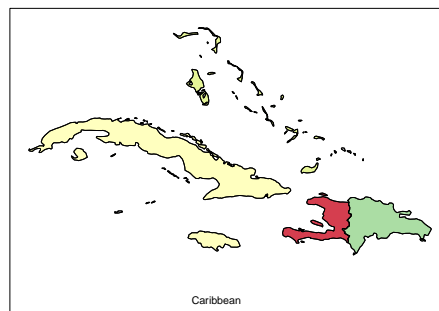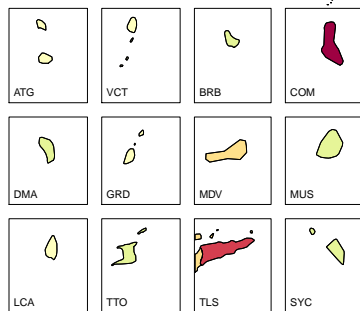

291

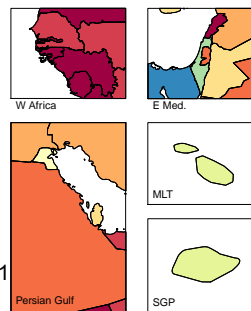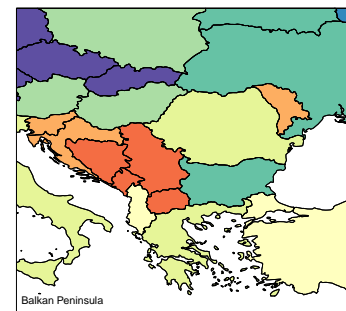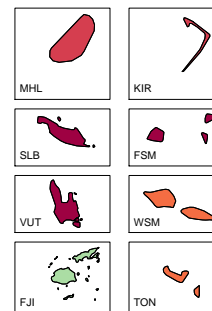



Appendix Figure 2: Sibling history correction for zero-survivorship, by sex

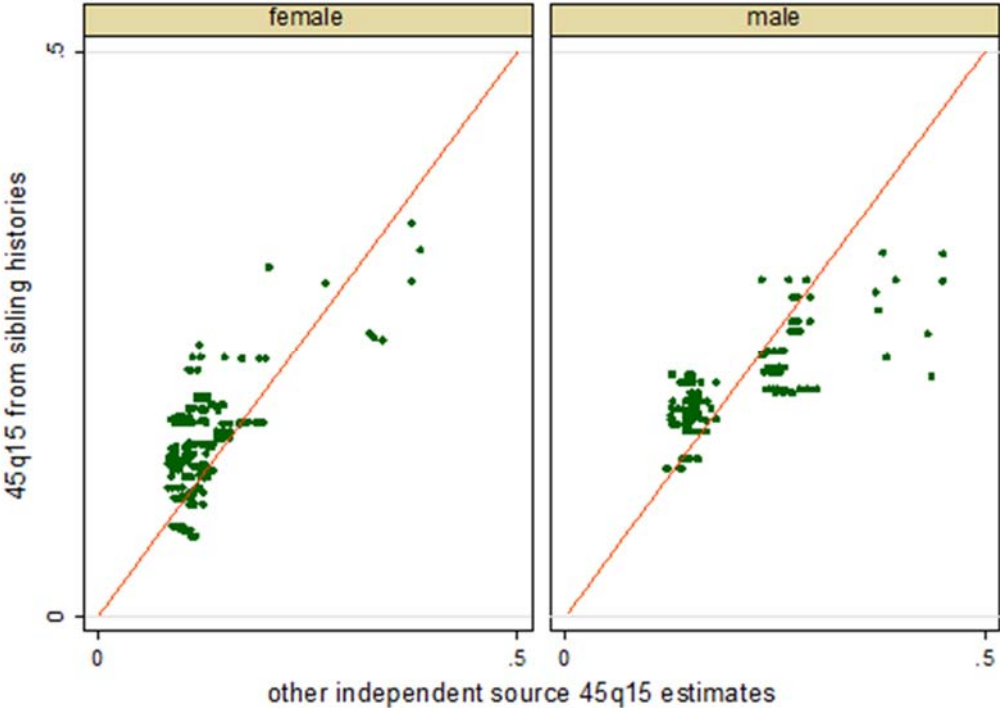

Appendix Figure 3: Comparison of GBD 2015 adolescent mortality in India to sample registration system, Demographic and Health Surveys (DHS), and UN Population Division's World Population Prospects (WPP) 2015

Probability of death from age 5 to 15 in India, 1990–2015

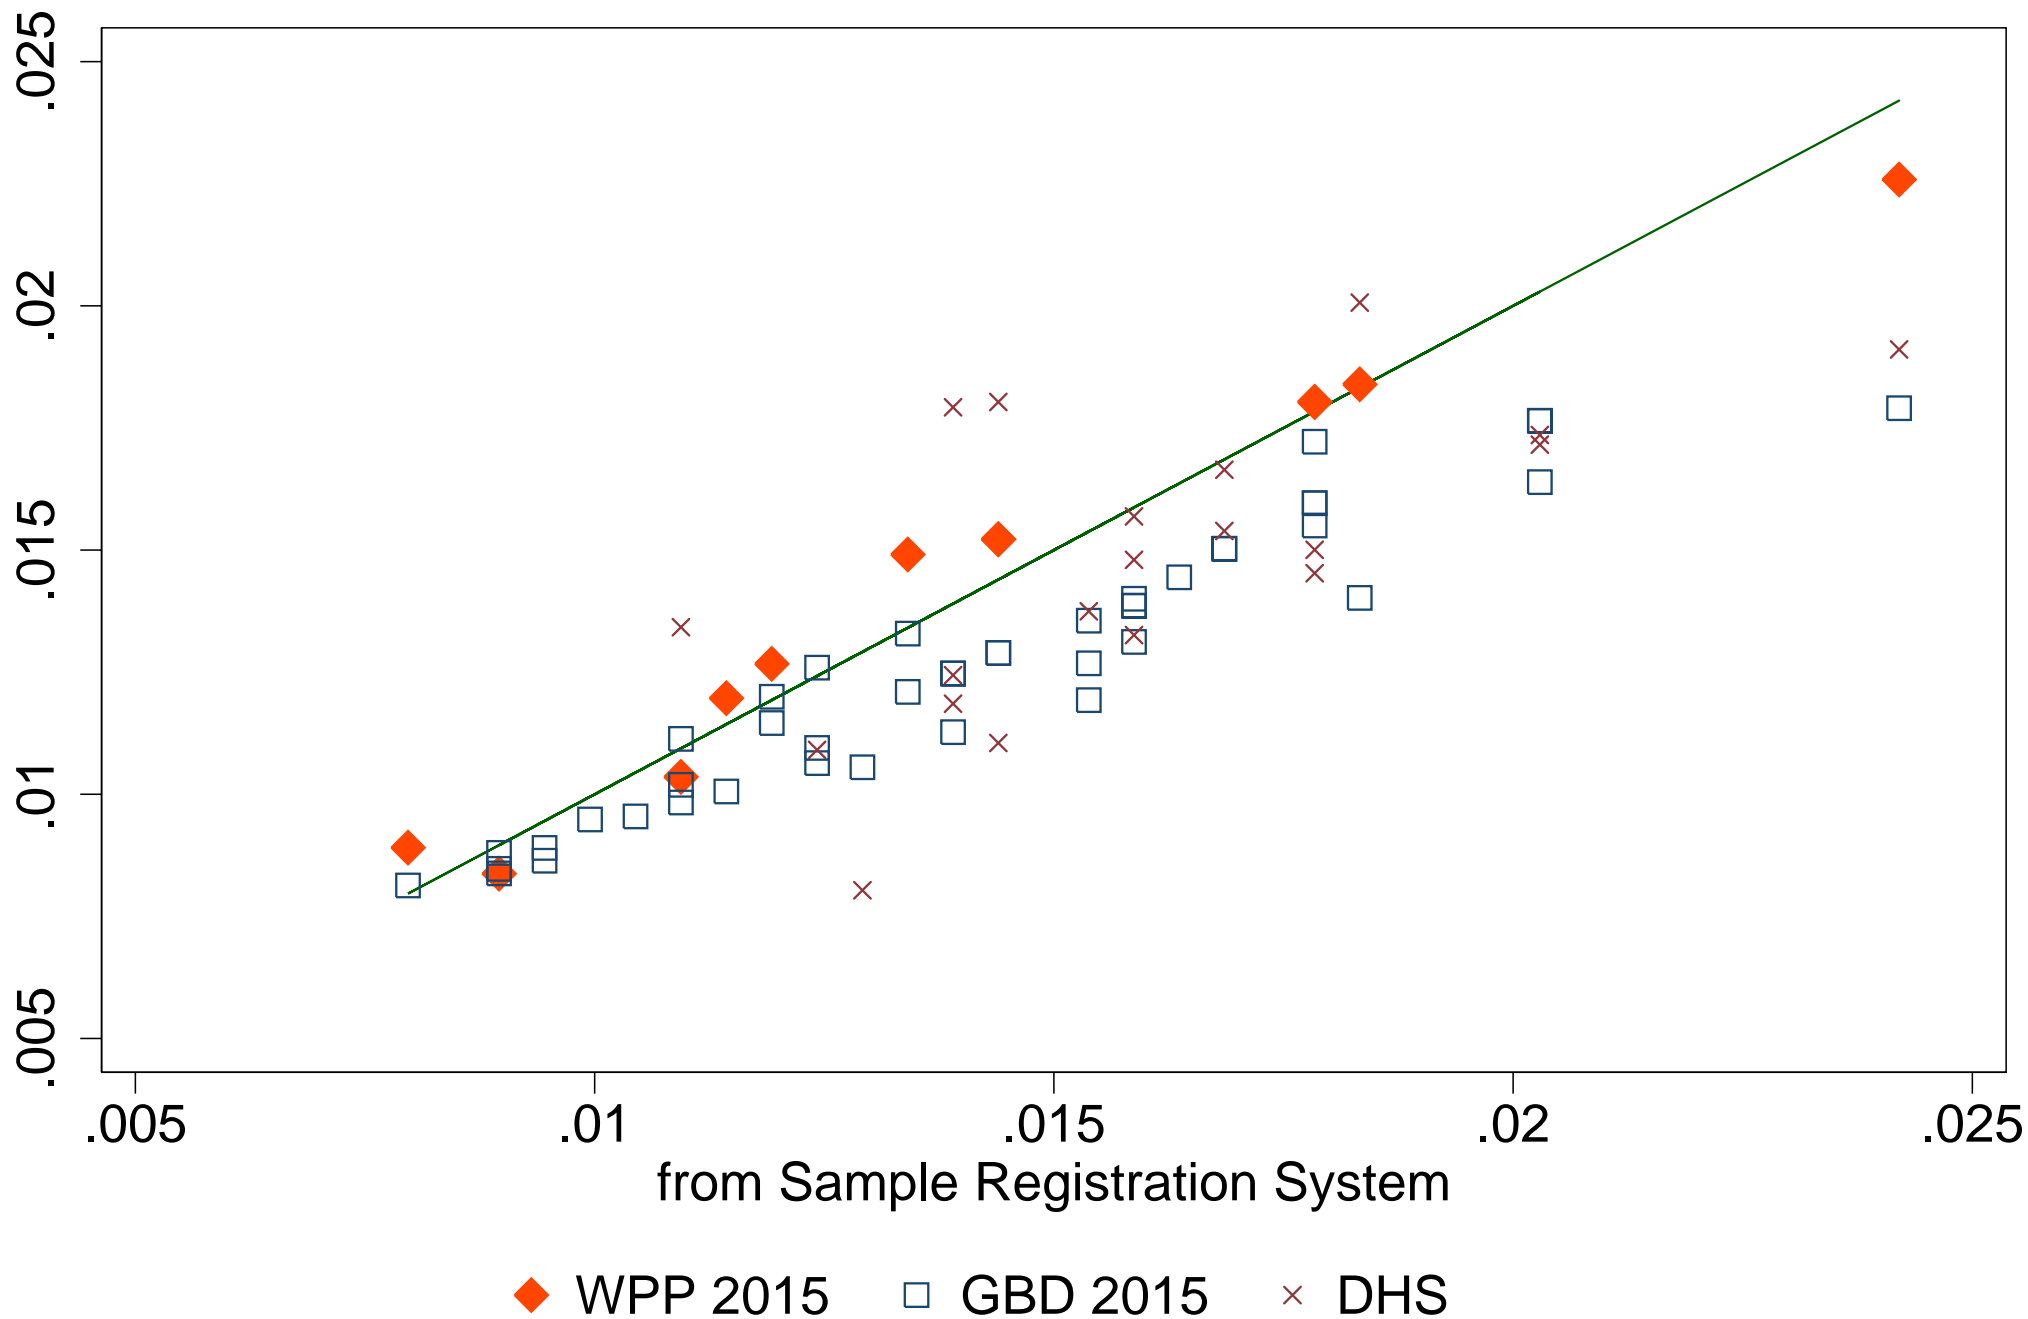

# Probability of death from age 15 to 20 in India, 1990–2015

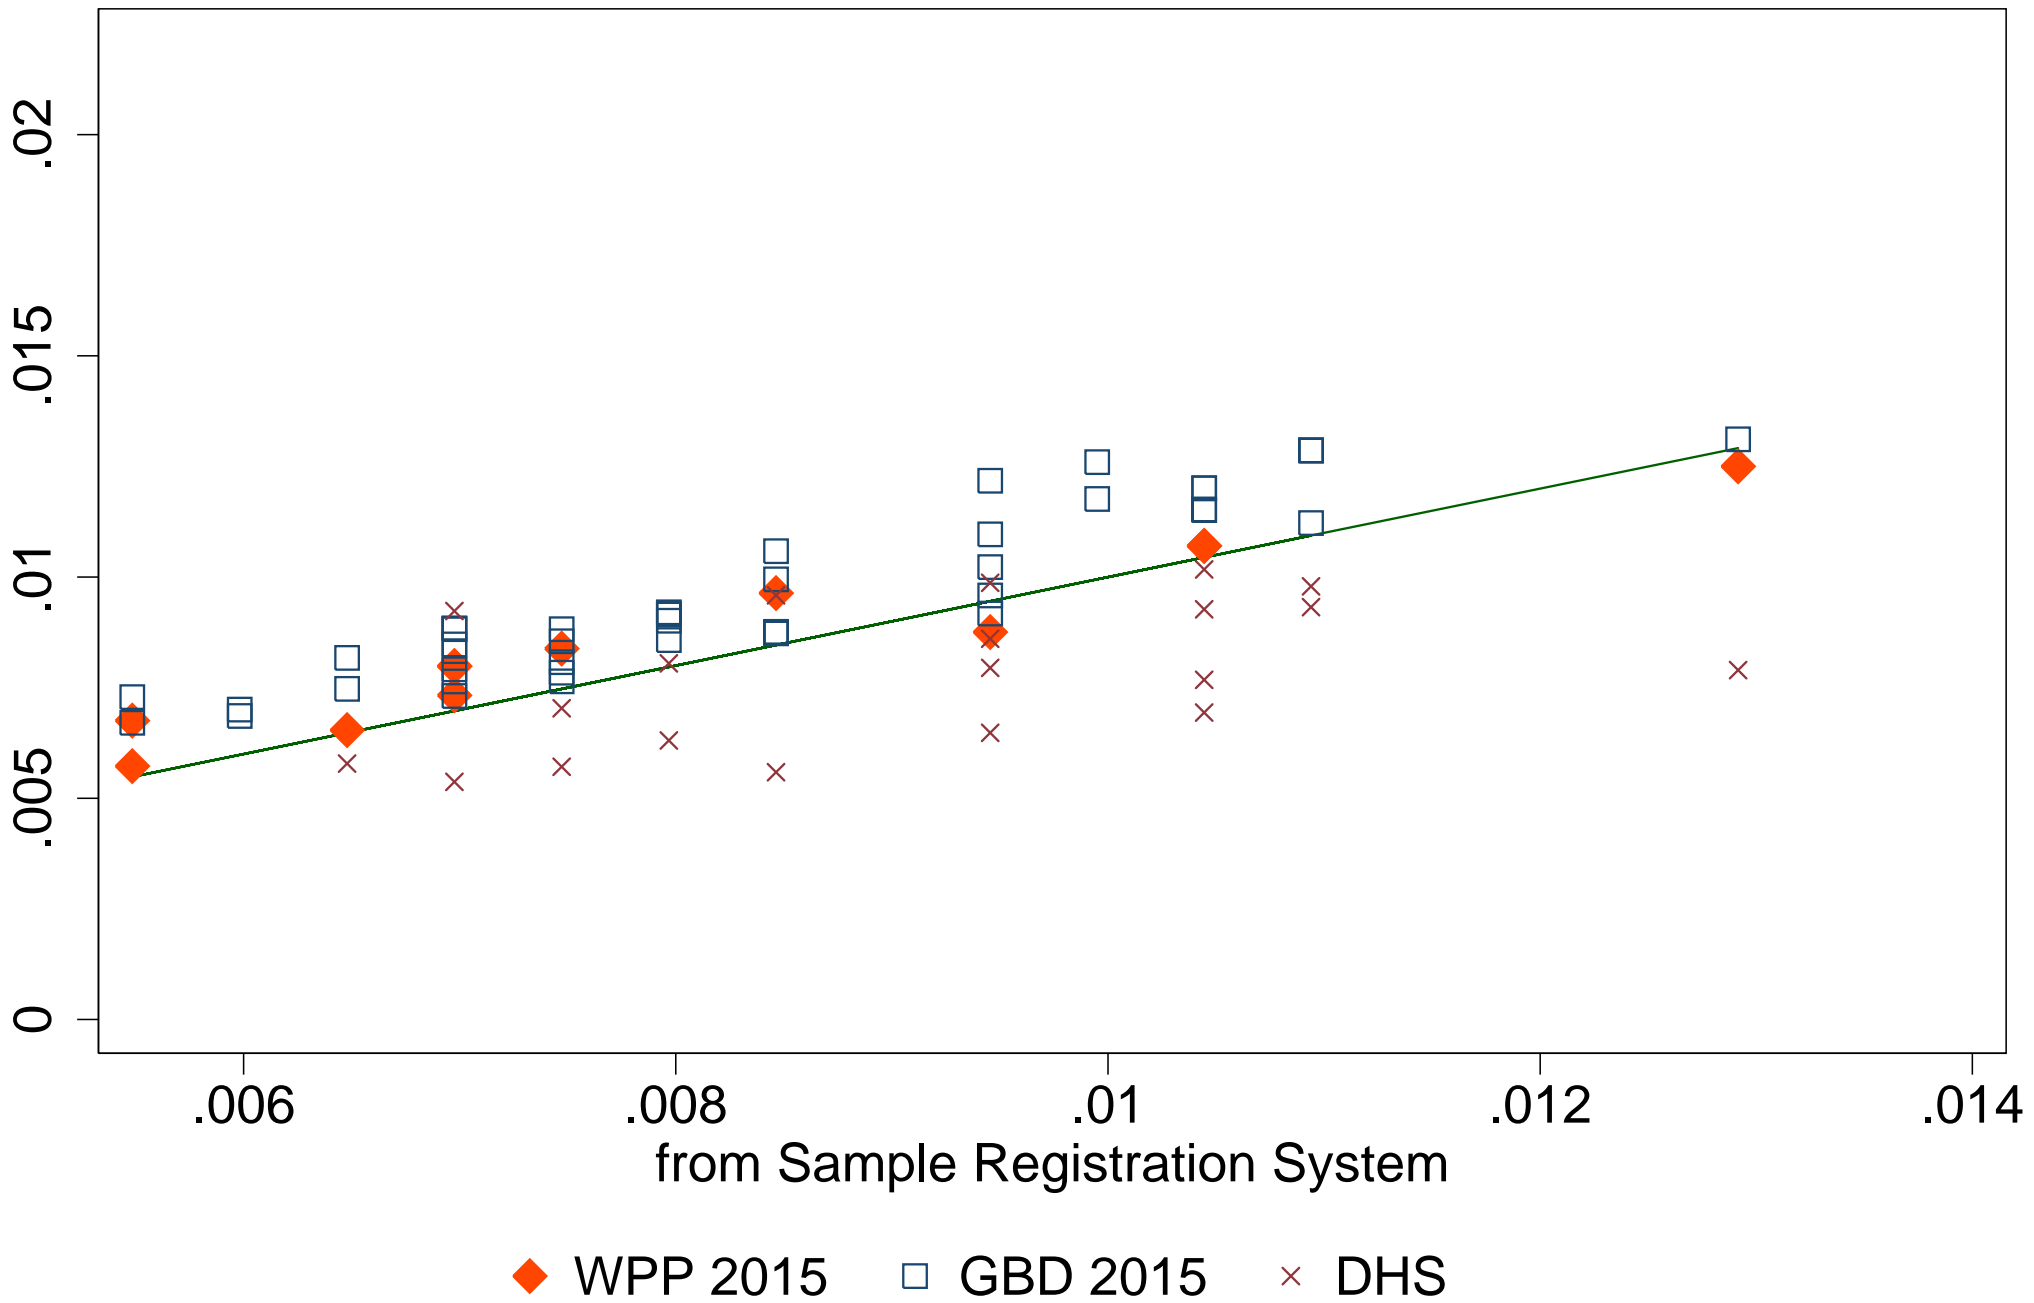

Probability of death from age 10 to 15 in India, 1990–2015

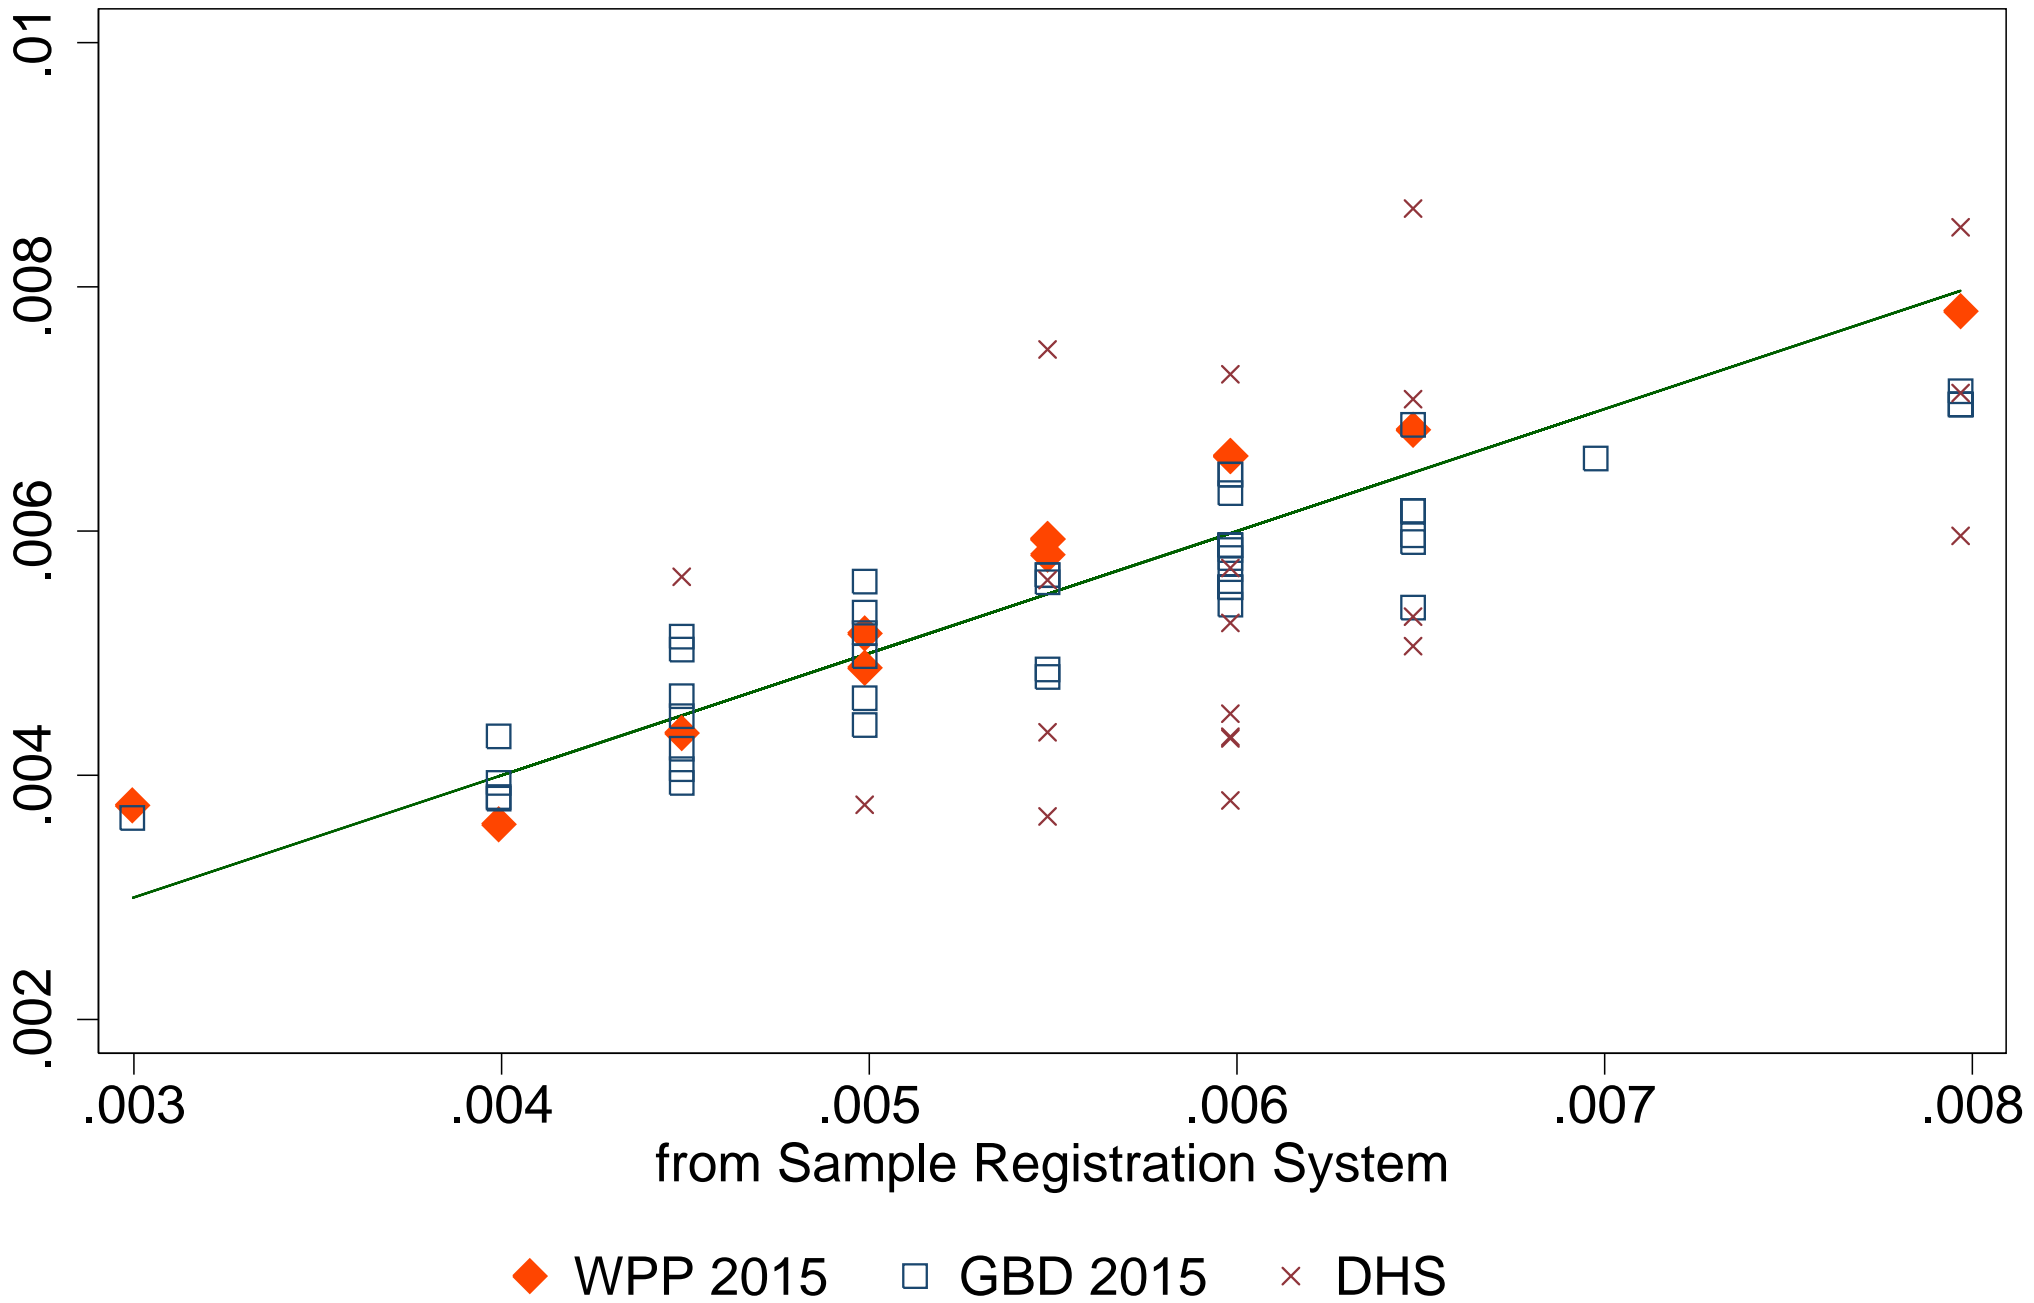

# Probability of death from age 5 to 10 in India, 1990–2015

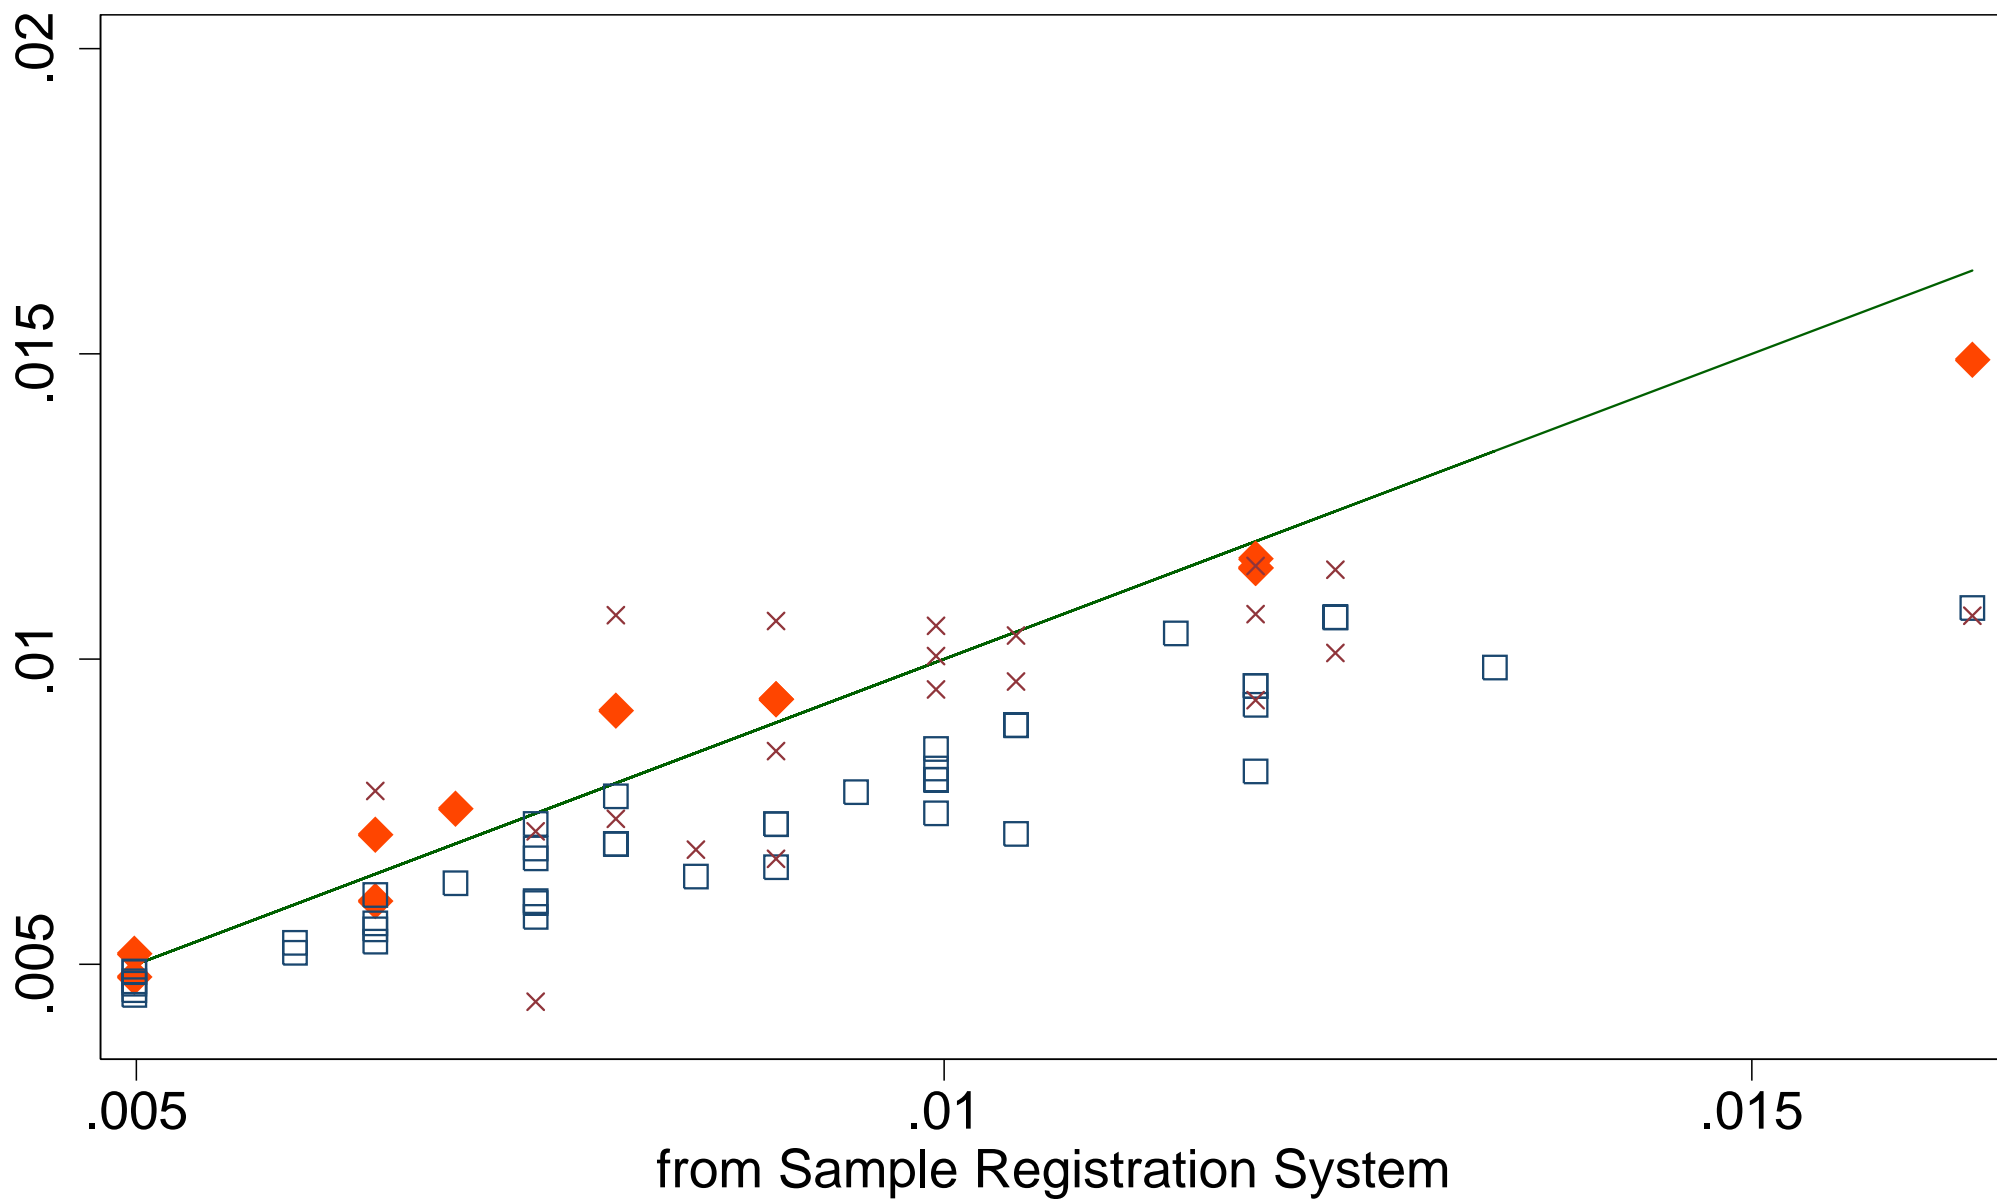

◆ WPP 2015    □ GBD 2015    × DHS

**Appendix Table 1: GBD 2015 geographies with HIV/AIDS modeling strategy group**

| Location               | Group |
|------------------------|-------|
| Afghanistan            | 2C    |
| Albania                | 2B    |
| Algeria                | 2B    |
| American Samoa         | 2B    |
| Andorra                | 2C    |
| Angola                 | 1A    |
| Antigua and Barbuda    | 2A    |
| Argentina              | 2A    |
| Armenia                | 2B    |
| Australia              | 2A    |
| Austria                | 2A    |
| Azerbaijan             | 2B    |
| Bahrain                | 2B    |
| Bangladesh             | 2C    |
| Barbados               | 2A    |
| Belarus                | 2B    |
| Belgium                | 2A    |
| Belize                 | 2B    |
| Benin                  | 1A    |
| Bermuda                | 2A    |
| Bhutan                 | 2C    |
| Bolivia                | 2B    |
| Bosnia and Herzegovina | 2B    |
| Botswana               | 1A    |
| <b>Brazil</b>          | *     |
| Acre                   | 2B    |
| Alagoas                | 2B    |
| Amapa                  | 2B    |
| Amazonas               | 2B    |
| Bahia                  | 2B    |
| Ceara                  | 2B    |
| Distrito Federal       | 2B    |
| Espirito Santo         | 2B    |
| Goias                  | 2B    |
| Maranhao               | 2B    |
| Mato Grosso            | 2B    |
| Mato Grosso do Sul     | 2B    |
| Minas Gerais           | 2B    |
| Para                   | 2B    |
| Paraiba                | 2B    |
| Parana                 | 2B    |
| Pernambuco             | 2B    |
| Piaui                  | 2B    |
| Rio Grande do Norte    | 2B    |
| Rio Grande do Sul      | 2B    |
| Rio de Janeiro         | 2B    |
| Rondonia               | 2B    |

**Appendix Table 1: GBD 2015 geographies with HIV/AIDS modeling strategy group**

| Location                                         | Group |
|--------------------------------------------------|-------|
| Roraima                                          | 2B    |
| Santa Catarina                                   | 2B    |
| Sao Paulo                                        | 2B    |
| Sergipe                                          | 2B    |
| Tocantins                                        | 2B    |
| Brunei                                           | 2B    |
| Bulgaria                                         | 2A    |
| Burkina Faso                                     | 1A    |
| Burundi                                          | 1A    |
| Cambodia                                         | 2B    |
| Cameroon                                         | 1A    |
| Canada                                           | 2A    |
| Cape Verde                                       | 1A    |
| Central African Republic                         | 1A    |
| Chad                                             | 1A    |
| Chile                                            | 2A    |
| <b>China</b>                                     | *     |
| Anhui                                            | 2B    |
| Beijing                                          | 2B    |
| Chongqing                                        | 2B    |
| Fujian                                           | 2B    |
| Gansu                                            | 2B    |
| Guangdong                                        | 2B    |
| Guangxi                                          | 2B    |
| Guizhou                                          | 2B    |
| Hainan                                           | 2B    |
| Hebei                                            | 2B    |
| Heilongjiang                                     | 2B    |
| Henan                                            | 2B    |
| Hong Kong Special Administrative Region of China | 2B    |
| Hubei                                            | 2B    |
| Hunan                                            | 2B    |
| Inner Mongolia                                   | 2B    |
| Jiangsu                                          | 2B    |
| Jiangxi                                          | 2B    |
| Jilin                                            | 2B    |
| Liaoning                                         | 2B    |
| Macao Special Administrative Region of China     | 2C    |
| Ningxia                                          | 2B    |
| Qinghai                                          | 2B    |
| Shaanxi                                          | 2B    |
| Shandong                                         | 2B    |
| Shanghai                                         | 2B    |
| Shanxi                                           | 2B    |
| Sichuan                                          | 2B    |
| Tianjin                                          | 2B    |
| Tibet                                            | 2B    |

**Appendix Table 1: GBD 2015 geographies with HIV/AIDS modeling strategy group**

| Location                         | Group |
|----------------------------------|-------|
| Xinjiang                         | 2B    |
| Yunnan                           | 2B    |
| Zhejiang                         | 2B    |
| Colombia                         | 2A    |
| Comoros                          | 2C    |
| Congo                            | 1A    |
| Costa Rica                       | 2A    |
| Cote d'Ivoire                    | 1A    |
| Croatia                          | 2A    |
| Cuba                             | 2A    |
| Cyprus                           | 2B    |
| Czech Republic                   | 2A    |
| Democratic Republic of the Congo | 1A    |
| Denmark                          | 2A    |
| Djibouti                         | 1A    |
| Dominica                         | 2B    |
| Dominican Republic               | 1A    |
| Ecuador                          | 2B    |
| Egypt                            | 2B    |
| El Salvador                      | 2B    |
| Equatorial Guinea                | 1A    |
| Eritrea                          | 1A    |
| Estonia                          | 2A    |
| Ethiopia                         | 1A    |
| Federated States of Micronesia   | 2C    |
| Fiji                             | 2B    |
| Finland                          | 2A    |
| France                           | 2A    |
| Gabon                            | 1A    |
| Georgia                          | 2B    |
| Germany                          | 2A    |
| Ghana                            | 1A    |
| Greece                           | 2A    |
| Greenland                        | 2B    |
| Grenada                          | 2B    |
| Guam                             | 2B    |
| Guatemala                        | 2A    |
| Guinea                           | 1A    |
| Guinea-Bissau                    | 1A    |
| Guyana                           | 2B    |
| Haiti                            | 1A    |
| Honduras                         | 2B    |
| Hungary                          | 2A    |
| Iceland                          | 2A    |
| <b>India</b>                     | *     |
| Andhra Pradesh, Rural            | 1B    |
| Andhra Pradesh, Urban            | 1B    |



**Appendix Table 1: GBD 2015 geographies with HIV/AIDS modeling strategy group**

| <b>Location</b>          | <b>Group</b> |
|--------------------------|--------------|
| Arunachal Pradesh, Rural | 1B           |
| Arunachal Pradesh, Urban | 1B           |
| Assam, Rural             | 1B           |
| Assam, Urban             | 1B           |
| Bihar, Rural             | 1B           |
| Bihar, Urban             | 1B           |
| Chhattisgarh, Rural      | 1B           |
| Chhattisgarh, Urban      | 1B           |
| Delhi, Rural             | 1B           |
| Delhi, Urban             | 1B           |
| Goa, Rural               | 1B           |
| Goa, Urban               | 1B           |
| Gujarat, Rural           | 1B           |
| Gujarat, Urban           | 1B           |
| Haryana, Rural           | 1B           |
| Haryana, Urban           | 1B           |
| Himachal Pradesh, Rural  | 1B           |
| Himachal Pradesh, Urban  | 1B           |
| Jammu and Kashmir, Rural | 1B           |
| Jammu and Kashmir, Urban | 1B           |
| Jharkhand, Rural         | 1B           |
| Jharkhand, Urban         | 1B           |
| Karnataka, Rural         | 1B           |
| Karnataka, Urban         | 1B           |
| Kerala, Rural            | 1B           |
| Kerala, Urban            | 1B           |
| Madhya Pradesh, Rural    | 1B           |
| Madhya Pradesh, Urban    | 1B           |
| Maharashtra, Rural       | 1B           |
| Maharashtra, Urban       | 1B           |
| Manipur, Rural           | 1B           |
| Manipur, Urban           | 1B           |
| Meghalaya, Rural         | 1B           |
| Meghalaya, Urban         | 1B           |
| Mizoram, Rural           | 1B           |
| Mizoram, Urban           | 1B           |
| Nagaland, Rural          | 1B           |
| Nagaland, Urban          | 1B           |
| Orissa, Rural            | 1B           |
| Orissa, Urban            | 1B           |
| Punjab, Rural            | 1B           |
| Punjab, Urban            | 1B           |
| Rajasthan, Rural         | 1B           |
| Rajasthan, Urban         | 1B           |
| Sikkim, Rural            | 1B           |
| Sikkim, Urban            | 1B           |
| Tamil Nadu, Rural        | 1B           |

**Appendix Table 1: GBD 2015 geographies with HIV/AIDS modeling strategy group**

| Location                         | Group |
|----------------------------------|-------|
| Tamil Nadu, Urban                | 1B    |
| Telangana, Rural                 | 1B    |
| Telangana, Urban                 | 1B    |
| The Six Minor Territories, Rural | 1B    |
| The Six Minor Territories, Urban | 1B    |
| Tripura, Rural                   | 1B    |
| Tripura, Urban                   | 1B    |
| Uttar Pradesh, Rural             | 1B    |
| Uttar Pradesh, Urban             | 1B    |
| Uttarakhand, Rural               | 1B    |
| Uttarakhand, Urban               | 1B    |
| West Bengal, Rural               | 1B    |
| West Bengal, Urban               | 1B    |
| Indonesia                        | 2C    |
| Iran                             | 2B    |
| Iraq                             | 2B    |
| Ireland                          | 2A    |
| Israel                           | 2A    |
| Italy                            | 2A    |
| Jamaica                          | 2B    |
| <b>Japan</b>                     | *     |
| Aichi                            | 2A    |
| Akita                            | 2A    |
| Aomori                           | 2A    |
| Chiba                            | 2A    |
| Ehime                            | 2A    |
| Fukui                            | 2A    |
| Fukuoka                          | 2A    |
| Fukushima                        | 2A    |
| Gifu                             | 2A    |
| Gunma                            | 2A    |
| Hiroshima                        | 2A    |
| Hokkaido                         | 2A    |
| Hyogo                            | 2A    |
| Ibaraki                          | 2A    |
| Ishikawa                         | 2A    |
| Iwate                            | 2A    |
| Kagawa                           | 2A    |
| Kagoshima                        | 2A    |
| Kanagawa                         | 2A    |
| Kochi                            | 2A    |
| Kumamoto                         | 2A    |
| Kyoto                            | 2A    |
| Mie                              | 2A    |
| Miyagi                           | 2A    |
| Miyazaki                         | 2A    |
| Nagano                           | 2A    |

**Appendix Table 1: GBD 2015 geographies with HIV/AIDS modeling strategy group**

| Location        | Group |
|-----------------|-------|
| Nagasaki        | 2A    |
| Nara            | 2A    |
| Niigata         | 2A    |
| Oita            | 2A    |
| Okayama         | 2A    |
| Okinawa         | 2A    |
| Osaka           | 2A    |
| Saga            | 2A    |
| Saitama         | 2A    |
| Shiga           | 2A    |
| Shimane         | 2A    |
| Shizuoka        | 2A    |
| Tochigi         | 2A    |
| Tokushima       | 2A    |
| Tokyo           | 2A    |
| Tottori         | 2A    |
| Toyama          | 2A    |
| Wakayama        | 2A    |
| Yamagata        | 2A    |
| Yamaguchi       | 2A    |
| Yamanashi       | 2A    |
| Jordan          | 2B    |
| Kazakhstan      | 2A    |
| <b>Kenya</b>    | *     |
| Baringo         | 1A    |
| Bomet           | 1A    |
| Bungoma         | 1A    |
| Busia           | 1A    |
| Elgeyo-Marakwet | 1A    |
| Embu            | 1A    |
| Garissa         | 1A    |
| HomaBay         | 1A    |
| Isiolo          | 1A    |
| Kajiado         | 1A    |
| Kakamega        | 1A    |
| Kericho         | 1A    |
| Kiambu          | 1A    |
| Kilifi          | 1A    |
| Kirinyaga       | 1A    |
| Kisii           | 1A    |
| Kisumu          | 1A    |
| Kitui           | 1A    |
| Kwale           | 1A    |
| Laikipia        | 1A    |
| Lamu            | 1A    |
| Machakos        | 1A    |
| Makueni         | 1A    |

**Appendix Table 1: GBD 2015 geographies with HIV/AIDS modeling strategy group**

| Location         | Group |
|------------------|-------|
| Mandera          | 1A    |
| Marsabit         | 1A    |
| Meru             | 1A    |
| Migori           | 1A    |
| Mombasa          | 1A    |
| Murang'a         | 1A    |
| Nairobi          | 1A    |
| Nakuru           | 1A    |
| Nandi            | 1A    |
| Narok            | 1A    |
| Nyamira          | 1A    |
| Nyandarua        | 1A    |
| Nyeri            | 1A    |
| Samburu          | 1A    |
| Siaya            | 1A    |
| TaitaTaveta      | 1A    |
| TanaRiver        | 1A    |
| TharakaNithi     | 1A    |
| TransNzoia       | 1A    |
| Turkana          | 1A    |
| UasinGishu       | 1A    |
| Vihiga           | 1A    |
| Wajir            | 1A    |
| WestPokot        | 1A    |
| Kiribati         | 2B    |
| Kuwait           | 2A    |
| Kyrgyzstan       | 2B    |
| Laos             | 2C    |
| Latvia           | 2A    |
| Lebanon          | 2C    |
| Lesotho          | 1A    |
| Liberia          | 1A    |
| Libya            | 2C    |
| Lithuania        | 2A    |
| Luxembourg       | 2A    |
| Macedonia        | 2B    |
| Madagascar       | 2C    |
| Malawi           | 1A    |
| Malaysia         | 2B    |
| Maldives         | 2B    |
| Mali             | 1A    |
| Malta            | 2A    |
| Marshall Islands | 2C    |
| Mauritania       | 2C    |
| Mauritius        | 2A    |
| <b>Mexico</b>    | *     |
| Aguascalientes   | 2A    |

**Appendix Table 1: GBD 2015 geographies with HIV/AIDS modeling strategy group**

| Location                        | Group |
|---------------------------------|-------|
| Baja California                 | 2A    |
| Baja California Sur             | 2A    |
| Campeche                        | 2A    |
| Chiapas                         | 2A    |
| Chihuahua                       | 2A    |
| Coahuila                        | 2A    |
| Colima                          | 2A    |
| Distrito Federal                | 2A    |
| Durango                         | 2A    |
| Guanajuato                      | 2A    |
| Guerrero                        | 2A    |
| Hidalgo                         | 2A    |
| Jalisco                         | 2A    |
| Mexico                          | 2A    |
| Michoacan de Ocampo             | 2A    |
| Morelos                         | 2A    |
| Nayarit                         | 2A    |
| Nuevo Leon                      | 2A    |
| Oaxaca                          | 2A    |
| Puebla                          | 2A    |
| Queretaro                       | 2A    |
| Quintana Roo                    | 2A    |
| San Luis Potosi                 | 2A    |
| Sinaloa                         | 2A    |
| Sonora                          | 2A    |
| Tabasco                         | 2A    |
| Tamaulipas                      | 2A    |
| Tlaxcala                        | 2A    |
| Veracruz de Ignacio de la Llave | 2A    |
| Yucatan                         | 2A    |
| Zacatecas                       | 2A    |
| Moldova                         | 2A    |
| Mongolia                        | 2B    |
| Montenegro                      | 2B    |
| Morocco                         | 2B    |
| Mozambique                      | 1A    |
| Myanmar                         | 2C    |
| Namibia                         | 1A    |
| Nepal                           | 2C    |
| Netherlands                     | 2A    |
| New Zealand                     | 2A    |
| Nicaragua                       | 2B    |
| Niger                           | 1A    |
| Nigeria                         | 1A    |
| North Korea                     | 2C    |
| Northern Mariana Islands        | 2B    |
| Norway                          | 2A    |

**Appendix Table 1: GBD 2015 geographies with HIV/AIDS modeling strategy group**

| Location                         | Group |
|----------------------------------|-------|
| Oman                             | 2B    |
| Pakistan                         | 2C    |
| Palestine                        | 2B    |
| Panama                           | 2B    |
| Papua New Guinea                 | 1A    |
| Paraguay                         | 2B    |
| Peru                             | 2B    |
| Philippines                      | 2A    |
| Poland                           | 2A    |
| Portugal                         | 2A    |
| Puerto Rico                      | 2A    |
| Qatar                            | 2B    |
| Romania                          | 2A    |
| Russia                           | 2A    |
| Rwanda                           | 1A    |
| Saint Lucia                      | 2A    |
| Saint Vincent and the Grenadines | 2A    |
| Samoa                            | 2C    |
| Sao Tome and Principe            | 2B    |
| <b>Saudi Arabia</b>              | *     |
| 'Asir                            | 2C    |
| Bahah                            | 2C    |
| Eastern Province                 | 2B    |
| Ha'il                            | 2C    |
| Jawf                             | 2C    |
| Jizan                            | 2C    |
| Madinah                          | 2B    |
| Makkah                           | 2B    |
| Najran                           | 2C    |
| Northern Borders                 | 2C    |
| Qassim                           | 2B    |
| Riyadh                           | 2C    |
| Tabuk                            | 2B    |
| Senegal                          | 1A    |
| Serbia                           | 2B    |
| Seychelles                       | 2B    |
| Sierra Leone                     | 1A    |
| Singapore                        | 2A    |
| Slovakia                         | 2B    |
| Slovenia                         | 2A    |
| Solomon Islands                  | 2C    |
| Somalia                          | 1A    |
| <b>South Africa</b>              | *     |
| Eastern Cape                     | 1A    |
| Free State                       | 1A    |
| Gauteng                          | 1A    |
| KwaZulu-Natal                    | 1A    |

**Appendix Table 1: GBD 2015 geographies with HIV/AIDS modeling strategy group**

| Location                 | Group |
|--------------------------|-------|
| Limpopo                  | 1A    |
| Mpumalanga               | 1A    |
| North-West               | 1A    |
| Northern Cape            | 1A    |
| Western Cape             | 1A    |
| South Korea              | 2A    |
| South Sudan              | 1A    |
| Spain                    | 2A    |
| Sri Lanka                | 2A    |
| Sudan                    | 1A    |
| Suriname                 | 2B    |
| Swaziland                | 1A    |
| <b>Sweden</b>            | *     |
| Stockholm                | 2A    |
| Sweden except Stockholm  | 2A    |
| Switzerland              | 2A    |
| Syria                    | 2B    |
| Taiwan                   | 2B    |
| Tajikistan               | 2B    |
| Tanzania                 | 1A    |
| Thailand                 | 2B    |
| The Bahamas              | 2B    |
| The Gambia               | 1A    |
| Timor-Leste              | 2C    |
| Togo                     | 1A    |
| Tonga                    | 2B    |
| Trinidad and Tobago      | 2A    |
| Tunisia                  | 2B    |
| Turkey                   | 2B    |
| Turkmenistan             | 2B    |
| Uganda                   | 1A    |
| Ukraine                  | 2A    |
| United Arab Emirates     | 2C    |
| <b>United Kingdom</b>    | *     |
| East Midlands            | 2A    |
| East of England          | 2A    |
| Greater London           | 2A    |
| North East England       | 2A    |
| North West England       | 2A    |
| Northern Ireland         | 2A    |
| Scotland                 | 2A    |
| South East England       | 2A    |
| South West England       | 2A    |
| Wales                    | 2A    |
| West Midlands            | 2A    |
| Yorkshire and the Humber | 2A    |
| <b>United States</b>     | *     |

**Appendix Table 1: GBD 2015 geographies with HIV/AIDS modeling strategy group**

| <b>Location</b>      | <b>Group</b> |
|----------------------|--------------|
| Alabama              | 2A           |
| Alaska               | 2A           |
| Arizona              | 2A           |
| Arkansas             | 2A           |
| California           | 2A           |
| Colorado             | 2A           |
| Connecticut          | 2A           |
| Delaware             | 2A           |
| District of Columbia | 2A           |
| Florida              | 2A           |
| Georgia              | 2A           |
| Hawaii               | 2A           |
| Idaho                | 2A           |
| Illinois             | 2A           |
| Indiana              | 2A           |
| Iowa                 | 2A           |
| Kansas               | 2A           |
| Kentucky             | 2A           |
| Louisiana            | 2A           |
| Maine                | 2A           |
| Maryland             | 2A           |
| Massachusetts        | 2A           |
| Michigan             | 2A           |
| Minnesota            | 2A           |
| Mississippi          | 2A           |
| Missouri             | 2A           |
| Montana              | 2A           |
| Nebraska             | 2A           |
| Nevada               | 2A           |
| New Hampshire        | 2A           |
| New Jersey           | 2A           |
| New Mexico           | 2A           |
| New York             | 2A           |
| North Carolina       | 2A           |
| North Dakota         | 2A           |
| Ohio                 | 2A           |
| Oklahoma             | 2A           |
| Oregon               | 2A           |
| Pennsylvania         | 2A           |
| Rhode Island         | 2A           |
| South Carolina       | 2A           |
| South Dakota         | 2A           |
| Tennessee            | 2A           |
| Texas                | 2A           |
| Utah                 | 2A           |
| Vermont              | 2A           |
| Virginia             | 2A           |



**Appendix Table 1: GBD 2015 geographies with HIV/AIDS modeling strategy group**

| <b>Location</b>      | <b>Group</b> |
|----------------------|--------------|
| Washington           | 2A           |
| West Virginia        | 2A           |
| Wisconsin            | 2A           |
| Wyoming              | 2A           |
| Uruguay              | 2A           |
| Uzbekistan           | 2B           |
| Vanuatu              | 2C           |
| Venezuela            | 2A           |
| Vietnam              | 2C           |
| Virgin Islands, U.S. | 2B           |
| Yemen                | 2C           |
| Zambia               | 1A           |
| Zimbabwe             | 1A           |

\*estimated at the sub-national level and aggregated to produce national estimates

**Appendix Table 2: Number of years with data points by country and decade**

|                                  | 1950s | 1960s | 1970s | 1980s | 1990s | 2000s | 2010s |
|----------------------------------|-------|-------|-------|-------|-------|-------|-------|
| <b>High-income North America</b> |       |       |       |       |       |       |       |
| Canada                           | 10    | 10    | 10    | 10    | 10    | 10    | 5     |
| Greenland                        | 16    | 18    | 20    | 16    | 11    | 10    | 4     |
| United States                    | 10    | 10    | 10    | 20    | 20    | 20    | 6     |
| <b>Australasia</b>               |       |       |       |       |       |       |       |
| Australia                        | 10    | 10    | 10    | 10    | 10    | 14    | 6     |
| New Zealand                      | 10    | 10    | 10    | 12    | 20    | 20    | 6     |
| <b>High-income Asia Pacific</b>  |       |       |       |       |       |       |       |
| Brunei                           | 10    | 7     | 9     | 8     | 8     | 15    | 6     |
| Japan                            | 10    | 10    | 11    | 20    | 20    | 20    | 7     |
| Singapore                        | 10    | 10    | 10    | 10    | 10    | 10    | 8     |
| South Korea                      | 0     | 0     | 6     | 12    | 12    | 10    | 6     |
| <b>Western Europe</b>            |       |       |       |       |       |       |       |
| Andorra                          | 5     | 0     | 0     | 0     | 4     | 14    | 2     |
| Austria                          | 15    | 10    | 10    | 10    | 10    | 10    | 8     |
| Belgium                          | 20    | 21    | 21    | 20    | 20    | 20    | 6     |
| Cyprus                           | 0     | 1     | 7     | 10    | 13    | 10    | 4     |
| Denmark                          | 11    | 10    | 10    | 10    | 10    | 13    | 5     |
| Finland                          | 12    | 10    | 10    | 10    | 10    | 10    | 6     |
| France                           | 11    | 10    | 10    | 10    | 10    | 10    | 4     |
| Germany                          | 8     | 20    | 20    | 20    | 20    | 20    | 6     |
| Greece                           | 9     | 10    | 10    | 10    | 10    | 10    | 5     |
| Iceland                          | 11    | 10    | 10    | 10    | 10    | 10    | 6     |
| Ireland                          | 10    | 10    | 10    | 10    | 10    | 10    | 8     |
| Israel                           | 10    | 10    | 10    | 10    | 14    | 20    | 4     |
| Italy                            | 11    | 10    | 10    | 10    | 10    | 12    | 5     |
| Luxembourg                       | 10    | 12    | 10    | 10    | 10    | 10    | 8     |
| Malta                            | 10    | 10    | 10    | 10    | 10    | 10    | 8     |
| Netherlands                      | 10    | 10    | 10    | 10    | 10    | 10    | 6     |
| Norway                           | 11    | 10    | 10    | 10    | 10    | 10    | 6     |
| Portugal                         | 15    | 10    | 11    | 11    | 10    | 9     | 6     |
| Spain                            | 20    | 20    | 20    | 20    | 20    | 20    | 6     |
| Sweden                           | 11    | 10    | 10    | 17    | 20    | 20    | 8     |
| Switzerland                      | 11    | 11    | 10    | 10    | 10    | 12    | 8     |
| United Kingdom                   | 10    | 10    | 10    | 10    | 10    | 10    | 4     |
| <b>Southern Latin America</b>    |       |       |       |       |       |       |       |
| Argentina                        | 10    | 10    | 6     | 11    | 11    | 10    | 7     |
| Chile                            | 10    | 10    | 11    | 12    | 11    | 11    | 8     |
| Uruguay                          | 10    | 10    | 11    | 11    | 11    | 14    | 6     |
| <b>Eastern Europe</b>            |       |       |       |       |       |       |       |
| Belarus                          | 2     | 20    | 20    | 14    | 11    | 14    | 7     |
| Estonia                          | 2     | 20    | 20    | 14    | 10    | 10    | 4     |
| Latvia                           | 2     | 20    | 20    | 11    | 10    | 10    | 4     |
| Lithuania                        | 2     | 20    | 20    | 13    | 10    | 10    | 7     |
| Moldova                          | 0     | 0     | 0     | 8     | 11    | 11    | 6     |
| Russia                           | 2     | 20    | 20    | 11    | 11    | 20    | 8     |
| Ukraine                          | 2     | 20    | 20    | 14    | 11    | 14    | 6     |
| <b>Central Europe</b>            |       |       |       |       |       |       |       |
| Albania                          | 10    | 10    | 0     | 3     | 12    | 17    | 2     |
| Bosnia and Herzegovina           | 0     | 0     | 0     | 5     | 4     | 12    | 4     |
| Bulgaria                         | 20    | 16    | 11    | 10    | 12    | 10    | 3     |
| Croatia                          | 0     | 0     | 0     | 5     | 10    | 10    | 5     |
| Czech Republic                   | 20    | 20    | 20    | 16    | 10    | 10    | 6     |
| Hungary                          | 15    | 11    | 10    | 10    | 10    | 10    | 6     |
| Macedonia                        | 0     | 0     | 0     | 2     | 10    | 13    | 4     |
| Montenegro                       | 0     | 1     | 1     | 1     | 6     | 14    | 4     |
| Poland                           | 11    | 10    | 11    | 10    | 12    | 10    | 6     |
| Romania                          | 4     | 11    | 11    | 10    | 13    | 10    | 4     |
| Serbia                           | 1     | 1     | 1     | 0     | 7     | 10    | 7     |
| Slovakia                         | 20    | 20    | 20    | 20    | 12    | 10    | 9     |

**Appendix Table 2: Number of years with data points by country and decade**

|                                  | 1950s | 1960s | 1970s | 1980s | 1990s | 2000s | 2010s |
|----------------------------------|-------|-------|-------|-------|-------|-------|-------|
| Slovenia                         | 0     | 0     | 0     | 10    | 10    | 10    | 6     |
| <b>Central Asia</b>              |       |       |       |       |       |       |       |
| Armenia                          | 0     | 0     | 0     | 11    | 10    | 15    | 6     |
| Azerbaijan                       | 0     | 0     | 0     | 11    | 10    | 17    | 5     |
| Georgia                          | 0     | 0     | 0     | 8     | 10    | 12    | 11    |
| Kazakhstan                       | 0     | 0     | 0     | 8     | 14    | 12    | 6     |
| Kyrgyzstan                       | 0     | 0     | 0     | 11    | 14    | 12    | 10    |
| Mongolia                         | 0     | 2     | 4     | 8     | 12    | 15    | 4     |
| Tajikistan                       | 0     | 0     | 0     | 8     | 11    | 14    | 5     |
| Turkmenistan                     | 0     | 0     | 0     | 7     | 9     | 1     | 2     |
| Uzbekistan                       | 0     | 0     | 0     | 7     | 11    | 12    | 0     |
| <b>Central Latin America</b>     |       |       |       |       |       |       |       |
| Colombia                         | 10    | 10    | 11    | 18    | 18    | 16    | 7     |
| Costa Rica                       | 9     | 10    | 12    | 13    | 11    | 11    | 8     |
| El Salvador                      | 10    | 10    | 11    | 12    | 13    | 16    | 7     |
| Guatemala                        | 10    | 10    | 10    | 11    | 13    | 14    | 9     |
| Honduras                         | 10    | 10    | 11    | 10    | 3     | 8     | 6     |
| Mexico                           | 10    | 10    | 11    | 12    | 13    | 15    | 9     |
| Nicaragua                        | 10    | 8     | 7     | 4     | 14    | 15    | 8     |
| Panama                           | 9     | 11    | 12    | 11    | 12    | 12    | 9     |
| Venezuela                        | 10    | 10    | 11    | 11    | 11    | 11    | 6     |
| <b>Andean Latin America</b>      |       |       |       |       |       |       |       |
| Bolivia                          | 8     | 2     | 3     | 3     | 4     | 9     | 0     |
| Ecuador                          | 6     | 10    | 12    | 13    | 16    | 13    | 10    |
| Peru                             | 10    | 9     | 11    | 14    | 14    | 18    | 13    |
| <b>Caribbean</b>                 |       |       |       |       |       |       |       |
| Antigua and Barbuda              | 10    | 8     | 9     | 6     | 12    | 10    | 4     |
| The Bahamas                      | 0     | 8     | 12    | 14    | 13    | 11    | 6     |
| Barbados                         | 10    | 10    | 10    | 10    | 6     | 11    | 6     |
| Belize                           | 10    | 10    | 10    | 9     | 13    | 12    | 9     |
| Bermuda                          | 10    | 11    | 10    | 10    | 10    | 11    | 8     |
| Cuba                             | 1     | 10    | 10    | 11    | 10    | 10    | 7     |
| Dominica                         | 10    | 8     | 10    | 10    | 10    | 10    | 7     |
| Dominican Republic               | 10    | 10    | 12    | 13    | 11    | 15    | 6     |
| Grenada                          | 10    | 10    | 5     | 3     | 13    | 10    | 7     |
| Guyana                           | 10    | 3     | 6     | 3     | 11    | 14    | 5     |
| Haiti                            | 0     | 0     | 1     | 2     | 1     | 5     | 1     |
| Jamaica                          | 10    | 11    | 5     | 11    | 4     | 12    | 4     |
| Puerto Rico                      | 10    | 10    | 10    | 10    | 18    | 19    | 5     |
| Saint Lucia                      | 10    | 4     | 8     | 10    | 10    | 10    | 6     |
| Saint Vincent and the Grenadines | 7     | 5     | 7     | 8     | 7     | 10    | 7     |
| Suriname                         | 8     | 6     | 8     | 9     | 11    | 12    | 6     |
| Trinidad and Tobago              | 10    | 10    | 11    | 11    | 10    | 14    | 0     |
| Virgin Islands, U.S.             | 10    | 9     | 6     | 10    | 8     | 10    | 3     |
| <b>Tropical Latin America</b>    |       |       |       |       |       |       |       |
| Brazil                           | 0     | 1     | 7     | 11    | 19    | 21    | 7     |
| Paraguay                         | 10    | 10    | 12    | 11    | 14    | 13    | 7     |
| <b>East Asia</b>                 |       |       |       |       |       |       |       |
| China                            | 0     | 0     | 2     | 7     | 26    | 45    | 13    |
| North Korea                      | 0     | 0     | 0     | 0     | 0     | 1     | 0     |
| Taiwan                           | 5     | 10    | 20    | 20    | 20    | 20    | 4     |
| <b>Southeast Asia</b>            |       |       |       |       |       |       |       |
| Cambodia                         | 0     | 0     | 0     | 0     | 4     | 4     | 2     |
| Indonesia                        | 0     | 1     | 3     | 3     | 16    | 19    | 6     |
| Laos                             | 0     | 0     | 0     | 0     | 1     | 1     | 2     |
| Malaysia                         | 8     | 10    | 8     | 4     | 11    | 16    | 0     |
| Maldives                         | 0     | 0     | 6     | 11    | 14    | 13    | 3     |
| Mauritius                        | 10    | 10    | 10    | 10    | 10    | 10    | 8     |
| Myanmar                          | 0     | 0     | 0     | 1     | 1     | 3     | 2     |
| Philippines                      | 9     | 10    | 13    | 19    | 15    | 15    | 5     |

**Appendix Table 2: Number of years with data points by country and decade**

|                                     | 1950s | 1960s | 1970s | 1980s | 1990s | 2000s | 2010s |
|-------------------------------------|-------|-------|-------|-------|-------|-------|-------|
| Sri Lanka                           | 10    | 11    | 12    | 11    | 14    | 16    | 1     |
| Seychelles                          | 7     | 10    | 11    | 10    | 11    | 11    | 5     |
| Thailand                            | 10    | 10    | 12    | 14    | 11    | 12    | 3     |
| Timor-Leste                         | 0     | 0     | 0     | 0     | 6     | 4     | 0     |
| Vietnam                             | 0     | 0     | 0     | 1     | 2     | 7     | 6     |
| <b>Oceania</b>                      |       |       |       |       |       |       |       |
| American Samoa                      | 8     | 10    | 5     | 7     | 7     | 10    | 3     |
| Federated States of Micronesia      | 0     | 0     | 1     | 0     | 2     | 2     | 0     |
| Fiji                                | 11    | 11    | 12    | 9     | 5     | 19    | 3     |
| Guam                                | 10    | 10    | 10    | 7     | 9     | 10    | 3     |
| Kiribati                            | 0     | 2     | 2     | 0     | 9     | 4     | 1     |
| Marshall Islands                    | 0     | 0     | 0     | 4     | 9     | 3     | 1     |
| Northern Mariana Islands            | 0     | 0     | 0     | 1     | 2     | 10    | 3     |
| Papua New Guinea                    | 0     | 0     | 2     | 2     | 3     | 2     | 0     |
| Samoa                               | 6     | 12    | 6     | 2     | 0     | 2     | 1     |
| Solomon Islands                     | 0     | 0     | 2     | 0     | 1     | 2     | 0     |
| Tonga                               | 3     | 6     | 1     | 2     | 4     | 6     | 1     |
| Vanuatu                             | 0     | 1     | 0     | 0     | 0     | 2     | 1     |
| <b>North Africa and Middle East</b> |       |       |       |       |       |       |       |
| Afghanistan                         | 0     | 0     | 1     | 0     | 0     | 4     | 2     |
| Algeria                             | 7     | 2     | 0     | 5     | 3     | 6     | 3     |
| Bahrain                             | 0     | 0     | 1     | 16    | 17    | 11    | 8     |
| Egypt                               | 15    | 15    | 11    | 12    | 20    | 14    | 8     |
| Iran                                | 0     | 0     | 5     | 9     | 7     | 13    | 3     |
| Iraq                                | 3     | 10    | 4     | 4     | 2     | 8     | 2     |
| Jordan                              | 6     | 10    | 11    | 3     | 4     | 8     | 5     |
| Kuwait                              | 0     | 8     | 11    | 12    | 10    | 10    | 7     |
| Lebanon                             | 0     | 0     | 0     | 0     | 2     | 3     | 0     |
| Libya                               | 0     | 0     | 6     | 1     | 2     | 7     | 0     |
| Morocco                             | 0     | 0     | 0     | 4     | 11    | 4     | 1     |
| Palestine                           | 0     | 0     | 0     | 0     | 3     | 12    | 6     |
| Oman                                | 0     | 0     | 1     | 2     | 2     | 9     | 5     |
| Qatar                               | 0     | 0     | 0     | 11    | 10    | 14    | 5     |
| Saudi Arabia                        | 0     | 0     | 0     | 1     | 3     | 13    | 4     |
| Sudan                               | 0     | 0     | 1     | 2     | 3     | 3     | 3     |
| Syria                               | 0     | 6     | 11    | 3     | 3     | 5     | 2     |
| Tunisia                             | 0     | 3     | 10    | 7     | 5     | 2     | 3     |
| Turkey                              | 0     | 0     | 4     | 11    | 13    | 15    | 8     |
| United Arab Emirates                | 0     | 0     | 1     | 1     | 6     | 9     | 0     |
| Yemen                               | 0     | 0     | 1     | 0     | 3     | 3     | 1     |
| <b>South Asia</b>                   |       |       |       |       |       |       |       |
| Bangladesh                          | 0     | 0     | 3     | 11    | 16    | 16    | 9     |
| Bhutan                              | 0     | 0     | 0     | 0     | 1     | 1     | 1     |
| India                               | 10    | 5     | 10    | 13    | 16    | 16    | 6     |
| Nepal                               | 0     | 0     | 2     | 1     | 3     | 4     | 4     |
| Pakistan                            | 0     | 1     | 6     | 8     | 14    | 15    | 1     |
| <b>Southern Sub-Saharan Africa</b>  |       |       |       |       |       |       |       |
| Botswana                            | 0     | 0     | 0     | 1     | 2     | 3     | 1     |
| Lesotho                             | 0     | 0     | 1     | 1     | 0     | 4     | 2     |
| Namibia                             | 0     | 0     | 0     | 0     | 2     | 4     | 2     |
| South Africa                        | 0     | 0     | 0     | 4     | 16    | 17    | 8     |
| Swaziland                           | 0     | 0     | 0     | 0     | 1     | 3     | 2     |
| Zimbabwe                            | 0     | 0     | 0     | 1     | 4     | 4     | 4     |
| <b>Western Sub-Saharan Africa</b>   |       |       |       |       |       |       |       |
| Benin                               | 0     | 0     | 0     | 2     | 2     | 2     | 3     |
| Burkina Faso                        | 0     | 0     | 0     | 2     | 7     | 4     | 2     |
| Cameroon                            | 0     | 0     | 1     | 1     | 2     | 3     | 1     |
| Cape Verde                          | 4     | 5     | 7     | 4     | 3     | 2     | 4     |
| Chad                                | 0     | 0     | 0     | 0     | 2     | 2     | 2     |
| Cote d'Ivoire                       | 0     | 0     | 1     | 6     | 3     | 1     | 2     |

**Appendix Table 2: Number of years with data points by country and decade**

|                                   | 1950s | 1960s | 1970s | 1980s | 1990s | 2000s | 2010s |
|-----------------------------------|-------|-------|-------|-------|-------|-------|-------|
| The Gambia                        | 0     | 0     | 1     | 0     | 1     | 2     | 2     |
| Ghana                             | 0     | 0     | 1     | 1     | 4     | 7     | 4     |
| Guinea                            | 2     | 0     | 0     | 0     | 3     | 1     | 1     |
| Guinea-Bissau                     | 0     | 0     | 0     | 0     | 0     | 2     | 2     |
| Liberia                           | 0     | 0     | 0     | 2     | 0     | 5     | 2     |
| Mali                              | 0     | 0     | 1     | 2     | 3     | 3     | 2     |
| Mauritania                        | 0     | 0     | 0     | 2     | 2     | 2     | 1     |
| Niger                             | 0     | 0     | 0     | 0     | 3     | 2     | 1     |
| Nigeria                           | 0     | 0     | 0     | 0     | 2     | 7     | 3     |
| Sao Tome and Principe             | 4     | 8     | 5     | 4     | 1     | 3     | 0     |
| Senegal                           | 0     | 0     | 1     | 1     | 3     | 5     | 5     |
| Sierra Leone                      | 0     | 0     | 0     | 0     | 0     | 4     | 2     |
| Togo                              | 0     | 1     | 0     | 1     | 1     | 1     | 4     |
| <b>Eastern Sub-Saharan Africa</b> |       |       |       |       |       |       |       |
| Burundi                           | 0     | 0     | 1     | 1     | 2     | 2     | 2     |
| Comoros                           | 1     | 0     | 0     | 1     | 1     | 1     | 1     |
| Djibouti                          | 0     | 0     | 0     | 0     | 1     | 2     | 0     |
| Eritrea                           | 0     | 0     | 0     | 0     | 1     | 1     | 0     |
| Ethiopia                          | 0     | 0     | 0     | 1     | 1     | 4     | 2     |
| Kenya                             | 0     | 1     | 3     | 3     | 4     | 6     | 1     |
| Madagascar                        | 4     | 7     | 3     | 0     | 4     | 5     | 1     |
| Malawi                            | 0     | 0     | 2     | 3     | 4     | 6     | 5     |
| Mozambique                        | 0     | 0     | 0     | 0     | 4     | 5     | 1     |
| Rwanda                            | 0     | 0     | 2     | 1     | 2     | 6     | 5     |
| Somalia                           | 0     | 0     | 0     | 0     | 1     | 1     | 0     |
| South Sudan                       | 0     | 0     | 0     | 0     | 0     | 1     | 1     |
| Tanzania                          | 0     | 1     | 0     | 1     | 6     | 6     | 2     |
| Uganda                            | 0     | 0     | 0     | 1     | 2     | 6     | 3     |
| Zambia                            | 0     | 0     | 0     | 1     | 3     | 6     | 3     |
| <b>Central Sub-Saharan Africa</b> |       |       |       |       |       |       |       |
| Angola                            | 0     | 0     | 0     | 0     | 0     | 2     | 1     |
| Central African Republic          | 0     | 0     | 1     | 1     | 1     | 2     | 1     |
| Congo                             | 0     | 0     | 1     | 0     | 0     | 3     | 2     |
| Democratic Republic of the Congo  | 0     | 0     | 0     | 0     | 1     | 2     | 2     |
| Equatorial Guinea                 | 0     | 0     | 0     | 0     | 0     | 1     | 1     |
| Gabon                             | 0     | 0     | 0     | 0     | 0     | 1     | 1     |

**Appendix Table 3: Total number of country-years used in HIV excess mortality age pattern estimation**

| Country            | Period covered | Total number of years used |
|--------------------|----------------|----------------------------|
| Argentina          | 1997 - 2010    | 14                         |
| Brazil             | 1996 - 2010    | 15                         |
| Colombia           | 1997 - 2008    | 12                         |
| Dominican Republic | 2001 - 2004    | 3                          |
| Spain              | 1999 - 2010    | 12                         |
| France             | 2000 - 2001    | 2                          |
| Haiti              | 1999 - 1999    | 1                          |
| Italy              | 2003 - 2007    | 2                          |
| Mexico             | 1998 - 2012    | 15                         |
| Peru               | 2000 - 2004    | 5                          |
| Thailand           | 1994 - 2007    | 12                         |
| United States      | 1999 - 2010    | 12                         |
| Venezuela          | 1997 - 2009    | 13                         |
| South Africa       | 1996 - 2009    | 14                         |
| <b>Total</b>       |                | <b>132</b>                 |

**Appendix Table 4: GBD world population age standard**

| <b>Age</b>  | <b>Percent of population</b> | <b>Rounded</b> |
|-------------|------------------------------|----------------|
| 0-6 days    | 0.0367429                    | 0.04           |
| 7-27 days   | 0.1079651                    | 0.11           |
| 28-364 days | 1.6850246                    | 1.68*          |
| 0-1 years   | 1.8297326                    | 1.83           |
| 1-5 years   | 7.1822788                    | 7.18           |
| 5-9 years   | 8.6928104                    | 8.69           |
| 10-14 years | 8.3952037                    | 8.4            |
| 15-19 years | 8.098376                     | 8.1            |
| 20-24 years | 7.8144767                    | 7.81           |
| 25-29 years | 7.559828                     | 7.56           |
| 30-34 years | 7.2485193                    | 7.25           |
| 35-39 years | 6.8558773                    | 6.86           |
| 40-44 years | 6.3842306                    | 6.38           |
| 45-49 years | 5.8490788                    | 5.85           |
| 50-54 years | 5.2709755                    | 5.27           |
| 55-59 years | 4.6780164                    | 4.68           |
| 60-64 years | 4.05754                      | 4.06           |
| 65-69 years | 3.3590683                    | 3.36           |
| 70-74 years | 2.6292656                    | 2.63           |
| 75-79 years | 1.8966813                    | 1.9            |
| 80-84 years | 1.2134801                    | 1.21           |
| 85-89 years | 0.644468                     | 0.64           |
| 90-94 years | 0.2576025                    | 0.26           |
| 95-99 years | 0.0700765                    | 0.07           |
| 100+ years  | 0.0124135                    | 0.01           |

\* rounded down in order for rounded numbers to sum to 100 percent

**Appendix Table 5: Total number of site years by cause and source type for 2015, excluding studies on lower respiratory infection and diarrhoea etiologic**

| Cause                                                             | Sort order | level | Vital registration | Verbal autopsy | Surveillance | Survey/Census | Cancer registry | Sibling history | Police records |
|-------------------------------------------------------------------|------------|-------|--------------------|----------------|--------------|---------------|-----------------|-----------------|----------------|
| All causes                                                        | 1          | 0     | 10801              | 534            | 1066         | 5             |                 | 57              |                |
| Communicable, maternal, neonatal, and nutritional diseases        | 2          | 1     | 10872              | 1445           | 2010         | 184           |                 | 3065            |                |
| HIV/AIDS and tuberculosis                                         | 3          | 2     | 10697              | 784            | 750          |               |                 |                 |                |
| Tuberculosis                                                      | 4          | 3     | 10691              | 768            | 361          |               |                 |                 |                |
| HIV/AIDS                                                          | 5          | 3     | 10344              | 200            | 390          |               |                 |                 |                |
| HIV/AIDS - Tuberculosis                                           | 6          | 4     | 4749               |                | 7            |               |                 |                 |                |
| HIV/AIDS resulting in other diseases                              | 7          | 4     | 8164               |                | 51           |               |                 |                 |                |
| Diarrhea, lower respiratory, and other common infectious diseases | 8          | 2     | 10835              | 993            | 560          |               |                 |                 |                |
| Diarrheal diseases                                                | 9          | 3     | 10770              | 910            | 509          |               |                 |                 |                |
| Intestinal infectious diseases                                    | 10         | 3     | 10627              | 510            |              |               |                 |                 |                |
| Typhoid fever                                                     | 11         | 4     | 9280               |                |              |               |                 |                 |                |
| Paratyphoid fever                                                 | 12         | 4     | 8542               |                |              |               |                 |                 |                |
| Other intestinal infectious diseases                              | 13         | 4     | 8787               |                |              |               |                 |                 |                |
| Lower respiratory infections                                      | 14         | 3     | 10766              | 854            | 560          |               |                 |                 |                |
| Upper respiratory infections                                      | 15         | 3     | 9276               |                |              |               |                 |                 |                |
| Otitis media                                                      | 16         | 3     | 9467               | 79             |              |               |                 |                 |                |
| Meningitis                                                        | 17         | 3     | 10658              | 633            | 546          |               |                 |                 |                |
| Pneumococcal meningitis                                           | 18         | 4     | 8140               |                |              |               |                 |                 |                |
| H influenzae type B meningitis                                    | 19         | 4     | 8141               |                |              |               |                 |                 |                |
| Meningococcal meningitis                                          | 20         | 4     | 9359               |                |              |               |                 |                 |                |
| Other meningitis                                                  | 21         | 4     | 8168               |                |              |               |                 |                 |                |
| Encephalitis                                                      | 22         | 3     | 10150              | 128            |              |               |                 |                 |                |
| Diphtheria                                                        | 23         | 3     | 9950               | 1              |              |               |                 |                 |                |
| Whooping cough                                                    | 24         | 3     | 10249              | 286            |              |               |                 |                 |                |
| Tetanus                                                           | 25         | 3     | 10578              | 621            | 393          |               |                 |                 |                |
| Measles                                                           | 26         | 3     | 10669              | 495            | 524          |               |                 |                 |                |
| Varicella and herpes zoster                                       | 27         | 3     | 9327               | 1              |              |               |                 |                 |                |
| Neglected tropical diseases and malaria                           | 28         | 2     | 10720              | 728            | 282          |               |                 |                 |                |
| Malaria                                                           | 29         | 3     | 9382               | 670            | 1            |               |                 |                 |                |
| Chagas disease                                                    | 30         | 3     | 3538               |                |              |               |                 |                 |                |
| Leishmaniasis                                                     | 31         | 3     | 9561               | 111            |              |               |                 |                 |                |
| Visceral leishmaniasis                                            | 32         | 4     | 9482               | 111            |              |               |                 |                 |                |
| African trypanosomiasis                                           | 33         | 3     | 8096               | 109            |              |               |                 |                 |                |
| Schistosomiasis                                                   | 34         | 3     | 8928               | 32             |              |               |                 |                 |                |
| Cysticercosis                                                     | 35         | 3     | 8934               |                |              |               |                 |                 |                |
| Cystic echinococcosis                                             | 36         | 3     | 9013               |                |              |               |                 |                 |                |
| Dengue                                                            | 37         | 3     | 9606               | 110            | 1            |               |                 |                 |                |
| Yellow fever                                                      | 38         | 3     | 8946               | 110            |              |               |                 |                 |                |
| Rabies                                                            | 39         | 3     | 10135              | 447            | 267          |               |                 |                 |                |
| Intestinal nematode infections                                    | 40         | 3     | 9638               | 157            |              |               |                 |                 |                |
| Ascariasis                                                        | 41         | 4     | 8776               |                |              |               |                 |                 |                |
| Ebola                                                             | 42         | 3     | 24                 |                | 13           |               |                 |                 |                |
| Other neglected tropical diseases                                 | 43         | 3     | 9839               | 43             |              |               |                 |                 |                |
| Maternal disorders                                                | 44         | 2     | 10716              | 887            | 1091         | 184           |                 | 3065            |                |
| Maternal hemorrhage                                               | 45         | 3     | 9762               | 475            | 731          | 7             |                 | 1               |                |
| Maternal sepsis and other maternal infections                     | 46         | 3     | 9290               | 321            | 455          | 6             |                 | 1               |                |
| Maternal hypertensive disorders                                   | 47         | 3     | 9967               | 400            | 728          | 7             |                 | 1               |                |
| Maternal obstructed labor and uterine rupture                     | 48         | 3     | 9708               | 321            | 566          | 6             |                 | 1               |                |
| Maternal abortion, miscarriage, and ectopic pregnancy             | 49         | 3     | 10280              | 424            | 589          | 7             |                 | 1               |                |
| Indirect maternal deaths                                          | 50         | 3     | 9137               | 365            | 747          | 7             |                 | 1               |                |
| Late maternal deaths                                              | 51         | 3     | 4190               |                | 140          |               |                 |                 |                |
| Maternal deaths aggravated by HIV/AIDS                            | 52         | 3     | 10715              | 887            | 1091         | 184           |                 | 3065            |                |
| Other maternal disorders                                          | 53         | 3     | 9518               | 3              | 704          | 5             |                 | 1               |                |
| Neonatal disorders                                                | 54         | 2     | 10584              | 813            | 546          |               |                 |                 |                |
| Neonatal preterm birth complications                              | 55         | 3     | 9300               | 166            | 558          |               |                 |                 |                |
| Neonatal encephalopathy due to birth asphyxia and trauma          | 56         | 3     | 9157               | 158            | 558          |               |                 |                 |                |
| Neonatal sepsis and other neonatal infections                     | 57         | 3     | 8718               |                | 546          |               |                 |                 |                |
| Hemolytic disease and other neonatal jaundice                     | 58         | 3     | 9411               |                |              |               |                 |                 |                |
| Other neonatal disorders                                          | 59         | 3     | 8306               |                | 552          |               |                 |                 |                |
| Nutritional deficiencies                                          | 60         | 2     | 10423              | 574            | 525          |               |                 |                 |                |
| Protein-energy malnutrition                                       | 61         | 3     | 10119              | 612            |              |               |                 |                 |                |
| Iodine deficiency                                                 | 62         | 3     | 1350               |                |              |               |                 |                 |                |
| Iron-deficiency anemia                                            | 63         | 3     | 8987               | 521            | 1            |               |                 |                 |                |
| Other nutritional deficiencies                                    | 64         | 3     | 8508               |                |              |               |                 |                 |                |
| Other communicable, maternal, neonatal, and nutritional diseases  | 65         | 2     | 10710              | 587            | 843          |               |                 |                 |                |
| Sexually transmitted diseases excluding HIV                       | 66         | 3     | 10562              | 145            | 228          |               |                 |                 |                |
| Syphilis                                                          | 67         | 4     | 10011              |                | 228          |               |                 |                 |                |
| Chlamydial infection                                              | 68         | 4     | 8080               |                |              |               |                 |                 |                |
| Gonococcal infection                                              | 69         | 4     | 9585               |                |              |               |                 |                 |                |
| Other sexually transmitted diseases                               | 70         | 4     | 8771               |                |              |               |                 |                 |                |
| Hepatitis                                                         | 71         | 3     | 10380              | 529            |              |               |                 |                 |                |
| Acute hepatitis A                                                 | 72         | 4     | 8128               |                |              |               |                 |                 |                |
| Acute hepatitis B                                                 | 73         | 4     | 8508               |                |              |               |                 |                 |                |
| Acute hepatitis C                                                 | 74         | 4     | 8080               |                |              |               |                 |                 |                |
| Acute hepatitis E                                                 | 75         | 4     | 8086               |                |              |               |                 |                 |                |
| Other infectious diseases                                         | 76         | 3     | 10435              | 493            | 793          |               |                 |                 |                |
| Non-communicable diseases                                         | 77         | 1     | 10824              | 1177           | 626          |               | 2454            |                 |                |
| Neoplasms                                                         | 78         | 2     | 10814              | 891            | 625          |               | 2454            |                 |                |
| Lip and oral cavity cancer                                        | 79         | 3     | 10049              | 134            |              |               | 2399            |                 |                |
| Nasopharynx cancer                                                | 80         | 3     | 10070              |                |              |               | 2354            |                 |                |
| Other pharynx cancer                                              | 81         | 3     | 10050              |                |              |               | 2323            |                 |                |
| Esophageal cancer                                                 | 82         | 3     | 10408              | 132            |              |               | 2411            |                 |                |
| Stomach cancer                                                    | 83         | 3     | 10414              |                |              |               | 2432            |                 |                |
| Colon and rectum cancer                                           | 84         | 3     | 10413              | 134            |              |               | 2432            |                 |                |
| Liver cancer                                                      | 85         | 3     | 10118              |                |              |               | 2419            |                 |                |
| Gallbladder and biliary tract cancer                              | 90         | 3     | 10090              |                |              |               | 2331            |                 |                |
| Pancreatic cancer                                                 | 91         | 3     | 9796               |                |              |               | 2418            |                 |                |
| Larynx cancer                                                     | 92         | 3     | 10390              |                |              |               | 2405            |                 |                |
| Tracheal, bronchus, and lung cancer                               | 93         | 3     | 10413              | 147            |              |               | 2413            |                 |                |
| Malignant skin melanoma                                           | 94         | 3     | 10103              |                |              |               | 2305            |                 |                |
| Non-melanoma skin cancer                                          | 95         | 3     | 9680               |                |              |               | 1230            |                 |                |
| Non-melanoma skin cancer (squamous-cell carcinoma)                | 96         | 4     | 8526               |                |              |               | 1230            |                 |                |



**Appendix Table 5: Total number of site years by cause and source type for 2015, excluding studies on lower respiratory infection and diarrhoea etiologic**

| Cause                                               | Sort order | level | Vital registration | Verbal autopsy | Surveillance | Survey/Census | Cancer registry | Sibling history | Police records |
|-----------------------------------------------------|------------|-------|--------------------|----------------|--------------|---------------|-----------------|-----------------|----------------|
| Breast cancer                                       | 97         | 3     | 10402              | 153            | 1            |               | 2417            |                 |                |
| Cervical cancer                                     | 98         | 3     | 10406              |                |              |               | 2382            |                 |                |
| Uterine cancer                                      | 99         | 3     | 10325              |                |              |               | 2373            |                 |                |
| Ovarian cancer                                      | 100        | 3     | 9802               |                |              |               | 2371            |                 |                |
| Prostate cancer                                     | 101        | 3     | 10356              |                |              |               | 2351            |                 |                |
| Testicular cancer                                   | 102        | 3     | 8869               | 84             |              |               | 2274            |                 |                |
| Kidney cancer                                       | 103        | 3     | 10095              |                |              |               | 2387            |                 |                |
| Bladder cancer                                      | 104        | 3     | 10100              |                |              |               | 2426            |                 |                |
| Brain and nervous system cancer                     | 105        | 3     | 9801               | 1              |              |               | 2418            |                 |                |
| Thyroid cancer                                      | 106        | 3     | 9713               |                |              |               | 2375            |                 |                |
| Mesothelioma                                        | 107        | 3     | 9095               |                |              |               | 1293            |                 |                |
| Hodgkin lymphoma                                    | 108        | 3     | 10078              |                |              |               | 2289            |                 |                |
| Non-Hodgkin lymphoma                                | 109        | 3     | 10102              |                |              |               | 2394            |                 |                |
| Multiple myeloma                                    | 110        | 3     | 10086              |                |              |               | 2294            |                 |                |
| Leukemia                                            | 111        | 3     | 10413              |                | 551          |               | 2396            |                 |                |
| Acute lymphoid leukemia                             | 113        | 4     | 8236               |                |              |               | 260             |                 |                |
| Chronic lymphoid leukemia                           | 114        | 4     | 8226               |                |              |               | 249             |                 |                |
| Acute myeloid leukemia                              | 116        | 4     | 8235               |                |              |               | 259             |                 |                |
| Chronic myeloid leukemia                            | 117        | 4     | 8234               |                |              |               | 259             |                 |                |
| Other neoplasms                                     | 118        | 3     | 10419              |                | 67           |               | 2444            |                 |                |
| Cardiovascular diseases                             | 119        | 2     | 10446              | 963            | 1            |               |                 |                 |                |
| Rheumatic heart disease                             | 120        | 3     | 10417              | 11             |              |               |                 |                 |                |
| Ischemic heart disease                              | 121        | 3     | 10652              | 734            |              |               |                 |                 |                |
| Cerebrovascular disease                             | 122        | 3     | 10660              | 691            | 1            |               |                 |                 |                |
| Ischemic stroke                                     | 123        | 4     | 9207               |                |              |               |                 |                 |                |
| Hemorrhagic stroke                                  | 124        | 4     | 9211               |                |              |               |                 |                 |                |
| Hypertensive heart disease                          | 125        | 3     | 10039              |                |              |               |                 |                 |                |
| Cardiomyopathy and myocarditis                      | 126        | 3     | 10020              |                |              |               |                 |                 |                |
| Atrial fibrillation and flutter                     | 127        | 3     | 8104               |                |              |               |                 |                 |                |
| Aortic aneurysm                                     | 128        | 3     | 9215               |                |              |               |                 |                 |                |
| Peripheral vascular disease                         | 129        | 3     | 8087               |                |              |               |                 |                 |                |
| Endocarditis                                        | 130        | 3     | 9274               |                |              |               |                 |                 |                |
| Other cardiovascular and circulatory diseases       | 131        | 3     | 10339              | 1              |              |               |                 |                 |                |
| Chronic respiratory diseases                        | 132        | 2     | 10714              | 866            | 517          |               |                 |                 |                |
| Chronic obstructive pulmonary disease               | 133        | 3     | 8928               |                |              |               |                 |                 |                |
| Pneumoconiosis                                      | 134        | 3     | 8181               |                |              |               |                 |                 |                |
| Silicosis                                           | 135        | 4     | 8158               |                |              |               |                 |                 |                |
| Asbestosis                                          | 136        | 4     | 8158               |                |              |               |                 |                 |                |
| Coal workers pneumoconiosis                         | 137        | 4     | 8141               |                |              |               |                 |                 |                |
| Other pneumoconiosis                                | 138        | 4     | 8163               |                |              |               |                 |                 |                |
| Asthma                                              | 139        | 3     | 8174               |                |              |               |                 |                 |                |
| Interstitial lung disease and pulmonary sarcoidosis | 140        | 3     | 8174               |                |              |               |                 |                 |                |
| Other chronic respiratory diseases                  | 141        | 3     | 8543               |                |              |               |                 |                 |                |
| Cirrhosis and other chronic liver diseases          | 142        | 2     | 10676              | 589            |              |               |                 |                 |                |
| Digestive diseases                                  | 147        | 2     | 10395              | 730            | 546          |               |                 |                 |                |
| Peptic ulcer disease                                | 148        | 3     | 10636              |                |              |               |                 |                 |                |
| Gastritis and duodenitis                            | 149        | 3     | 9029               |                |              |               |                 |                 |                |
| Appendicitis                                        | 150        | 3     | 10600              | 1              |              |               |                 |                 |                |
| Paralytic ileus and intestinal obstruction          | 151        | 3     | 10074              | 109            |              |               |                 |                 |                |
| Inguinal, femoral, and abdominal hernia             | 152        | 3     | 9628               | 342            |              |               |                 |                 |                |
| Inflammatory bowel disease                          | 153        | 3     | 8137               |                |              |               |                 |                 |                |
| Vascular intestinal disorders                       | 154        | 3     | 8111               |                |              |               |                 |                 |                |
| Gallbladder and biliary diseases                    | 155        | 3     | 10332              |                |              |               |                 |                 |                |
| Pancreatitis                                        | 156        | 3     | 8555               |                |              |               |                 |                 |                |
| Other digestive diseases                            | 157        | 3     | 8977               |                |              |               |                 |                 |                |
| Neurological disorders                              | 158        | 2     | 10406              | 416            | 553          |               |                 |                 |                |
| Alzheimer disease and other dementias               | 159        | 3     | 9922               | 1              |              |               |                 |                 |                |
| Parkinson disease                                   | 160        | 3     | 8969               |                |              |               |                 |                 |                |
| Epilepsy                                            | 161        | 3     | 10282              | 324            |              |               |                 |                 |                |
| Multiple sclerosis                                  | 162        | 3     | 7663               |                |              |               |                 |                 |                |
| Motor neuron disease                                | 163        | 3     | 8122               |                |              |               |                 |                 |                |
| Other neurological disorders                        | 164        | 3     | 8159               |                |              |               |                 |                 |                |
| Mental and substance use disorders                  | 165        | 2     | 10301              | 87             |              |               |                 |                 |                |
| Schizophrenia                                       | 166        | 3     | 9800               | 2              |              |               |                 |                 |                |
| Alcohol use disorders                               | 167        | 3     | 9396               | 74             |              |               |                 |                 |                |
| Drug use disorders                                  | 168        | 3     | 10166              | 71             |              |               |                 |                 |                |
| Opioid use disorders                                | 169        | 4     | 8465               |                |              |               |                 |                 |                |
| Cocaine use disorders                               | 170        | 4     | 8456               |                |              |               |                 |                 |                |
| Amphetamine use disorders                           | 171        | 4     | 8449               |                |              |               |                 |                 |                |
| Other drug use disorders                            | 172        | 4     | 8469               |                |              |               |                 |                 |                |
| Eating disorders                                    | 173        | 3     | 8061               |                |              |               |                 |                 |                |
| Anorexia nervosa                                    | 174        | 4     | 8061               |                |              |               |                 |                 |                |
| Bulimia nervosa                                     | 175        | 4     | 7901               |                |              |               |                 |                 |                |
| Diabetes, urogenital, blood, and endocrine diseases | 176        | 2     | 10468              | 765            |              |               |                 |                 |                |
| Diabetes mellitus                                   | 177        | 3     | 10455              | 570            |              |               |                 |                 |                |
| Acute glomerulonephritis                            | 178        | 3     | 9382               |                |              |               |                 |                 |                |
| Chronic kidney disease                              | 179        | 3     | 10432              | 721            |              |               |                 |                 |                |
| Chronic kidney disease due to diabetes mellitus     | 180        | 4     | 8528               |                |              |               |                 |                 |                |
| Chronic kidney disease due to hypertension          | 181        | 4     | 8537               |                |              |               |                 |                 |                |
| Chronic kidney disease due to glomerulonephritis    | 182        | 4     | 8528               |                |              |               |                 |                 |                |
| Chronic kidney disease due to other causes          | 183        | 4     | 8526               |                |              |               |                 |                 |                |
| Urinary diseases and male infertility               | 184        | 3     | 10399              | 131            |              |               |                 |                 |                |
| Interstitial nephritis and urinary tract infections | 185        | 4     | 10406              | 1              |              |               |                 |                 |                |
| Urolithiasis                                        | 186        | 4     | 10076              |                |              |               |                 |                 |                |
| Other urinary diseases                              | 187        | 4     | 8882               |                |              |               |                 |                 |                |
| Gynecological diseases                              | 188        | 3     | 9872               | 235            |              |               |                 |                 |                |
| Uterine fibroids                                    | 189        | 4     | 8125               |                |              |               |                 |                 |                |
| Polycystic ovarian syndrome                         | 190        | 4     | 6890               |                |              |               |                 |                 |                |
| Endometriosis                                       | 191        | 4     | 7082               |                |              |               |                 |                 |                |
| Genital prolapse                                    | 192        | 4     | 7984               |                |              |               |                 |                 |                |
| Other gynecological diseases                        | 193        | 4     | 8115               |                |              |               |                 |                 |                |
| Hemoglobinopathies and hemolytic anemias            | 194        | 3     | 9713               | 513            |              |               |                 |                 |                |

**Appendix Table 5: Total number of site years by cause and source type for 2015, excluding studies on lower respiratory infection and diarrhoea etiologic**

| Cause                                             | Sort order | level | Vital registration | Verbal autopsy | Surveillance | Survey/Census | Cancer registry | Sibling history | Police records |
|---------------------------------------------------|------------|-------|--------------------|----------------|--------------|---------------|-----------------|-----------------|----------------|
| Thalassemias                                      | 195        | 4     | 8885               | 174            |              |               |                 |                 |                |
| Sickle cell disorders                             | 196        | 4     | 8503               | 176            |              |               |                 |                 |                |
| G6PD deficiency                                   | 197        | 4     | 1077               |                |              |               |                 |                 |                |
| Other hemoglobinopathies and hemolytic anemias    | 198        | 4     | 8495               |                |              |               |                 |                 |                |
| Endocrine, metabolic, blood, and immune disorders | 199        | 3     | 10333              | 344            |              |               |                 |                 |                |
| Musculoskeletal disorders                         | 200        | 2     | 9654               | 133            |              |               |                 |                 |                |
| Rheumatoid arthritis                              | 201        | 3     | 9053               |                |              |               |                 |                 |                |
| Other musculoskeletal disorders                   | 202        | 3     | 9220               |                |              |               |                 |                 |                |
| Other non-communicable diseases                   | 203        | 2     | 10451              | 627            | 559          |               |                 |                 |                |
| Congenital anomalies                              | 204        | 3     | 10448              | 579            | 559          |               |                 |                 |                |
| Neural tube defects                               | 205        | 4     | 9551               |                | 548          |               |                 |                 |                |
| Congenital heart anomalies                        | 206        | 4     | 10310              | 1              | 557          |               |                 |                 |                |
| Cleft lip and cleft palate                        | 207        | 4     | 6418               |                |              |               |                 |                 |                |
| Down syndrome                                     | 208        | 4     | 8136               |                | 540          |               |                 |                 |                |
| Other chromosomal abnormalities                   | 209        | 4     | 8136               |                |              |               |                 |                 |                |
| Other congenital anomalies                        | 210        | 4     | 9331               |                | 481          |               |                 |                 |                |
| Skin and subcutaneous diseases                    | 211        | 3     | 10367              | 150            |              |               |                 |                 |                |
| Cellulitis                                        | 212        | 4     | 8533               | 1              |              |               |                 |                 |                |
| Pyoderma                                          | 213        | 4     | 9279               | 1              |              |               |                 |                 |                |
| Decubitus ulcer                                   | 214        | 4     | 8116               |                |              |               |                 |                 |                |
| Other skin and subcutaneous diseases              | 215        | 4     | 8179               |                |              |               |                 |                 |                |
| Sudden infant death syndrome                      | 216        | 3     | 7914               |                |              |               |                 |                 |                |
| Injuries                                          | 217        | 1     | 10672              | 915            | 562          | 39            |                 |                 |                |
| Transport injuries                                | 218        | 2     | 10544              | 640            | 557          | 17            |                 |                 |                |
| Road injuries                                     | 219        | 3     | 9478               |                |              | 5             |                 |                 | 61             |
| Pedestrian road injuries                          | 220        | 4     | 8172               |                |              |               |                 |                 | 66             |
| Cyclist road injuries                             | 221        | 4     | 8164               |                |              |               |                 |                 | 41             |
| Motorcyclist road injuries                        | 222        | 4     | 8172               |                |              | 2             |                 |                 | 48             |
| Motor vehicle road injuries                       | 223        | 4     | 8172               |                |              | 7             |                 |                 | 59             |
| Other road injuries                               | 224        | 4     | 8164               |                |              |               |                 |                 | 27             |
| Other transport injuries                          | 225        | 3     | 8854               |                |              | 2             |                 |                 | 2              |
| Unintentional injuries                            | 226        | 2     | 10594              | 728            | 556          | 8             |                 |                 |                |
| Falls                                             | 227        | 3     | 10556              | 494            | 554          | 5             |                 |                 |                |
| Drowning                                          | 228        | 3     | 10525              | 592            | 553          | 4             |                 |                 |                |
| Fire, heat, and hot substances                    | 229        | 3     | 10537              | 575            |              | 3             |                 |                 |                |
| Poisonings                                        | 230        | 3     | 10500              | 127            | 523          | 2             |                 |                 |                |
| Exposure to mechanical forces                     | 231        | 3     | 10184              | 90             |              | 5             |                 |                 |                |
| Unintentional firearm injuries                    | 232        | 4     | 10071              | 82             |              | 2             |                 |                 |                |
| Unintentional suffocation                         | 233        | 4     | 8483               | 82             | 558          | 1             |                 |                 |                |
| Other exposure to mechanical forces               | 234        | 4     | 9277               | 86             |              | 5             |                 |                 |                |
| Adverse effects of medical treatment              | 235        | 3     | 10170              |                |              | 2             |                 |                 |                |
| Animal contact                                    | 236        | 3     | 9801               | 481            |              | 3             |                 |                 |                |
| Venomous animal contact                           | 237        | 4     | 8915               | 144            |              |               |                 |                 |                |
| Non-venomous animal contact                       | 238        | 4     | 8534               |                |              |               |                 |                 |                |
| Foreign body                                      | 239        | 3     | 9305               | 135            |              | 2             |                 |                 |                |
| Pulmonary aspiration and foreign body in airway   | 240        | 4     | 8549               |                |              |               |                 |                 |                |
| Foreign body in other body part                   | 241        | 4     | 8443               |                |              |               |                 |                 |                |
| Environmental heat and cold exposure              | 242        | 3     | 9613               | 75             |              | 2             |                 |                 |                |
| Other unintentional injuries                      | 243        | 3     | 9394               | 135            |              | 3             |                 |                 |                |
| Self-harm and interpersonal violence              | 244        | 2     | 10593              | 751            | 1            | 13            |                 |                 |                |
| Self-harm                                         | 245        | 3     | 10579              | 710            |              | 5             |                 |                 |                |
| Interpersonal violence                            | 246        | 3     | 10539              | 577            |              | 11            |                 |                 | 1256           |
| Assault by firearm                                | 247        | 4     | 8161               | 86             |              | 5             |                 |                 |                |
| Assault by sharp object                           | 248        | 4     | 8162               | 84             |              | 1             |                 |                 |                |
| Assault by other means                            | 249        | 4     | 8164               | 85             |              |               |                 |                 |                |
| Forces of nature, war, and legal intervention     | 250        | 2     | 10410              | 93             |              | 9             |                 |                 |                |
| Exposure to forces of nature                      | 251        | 3     | 8554               | 81             |              | 5             |                 |                 |                |
| Collective violence and legal intervention        | 252        | 3     | 10169              | 87             |              | 5             |                 |                 |                |

**Appendix Table 6: Causes of death data source list by geography, source type, and study site, with years, age range, and sample size, excluding sources on lower respiratory infection and diarrhoea etiologies**

| Location         | Source name                                                                                                 | Source type        | Site | Years                | Ages            | Sample size |
|------------------|-------------------------------------------------------------------------------------------------------------|--------------------|------|----------------------|-----------------|-------------|
| China: Anhui     | China National Disease Surveillance Points (DSP)                                                            | Surveillance       |      | 1991-2000, 2002      | All Ages        | 26929       |
| China: Anhui     | China National Maternal and Child Health Surveillance System Maternal Mortality By Cause 2006-2012 - MCHS   | Surveillance       |      | 1996-2005            | 15 - 49 years   | MMR         |
| China: Anhui     | China National Maternal and Child Health Surveillance System Child Mortality Data By Cause 1996-2012 - MCHS | Surveillance       |      | 1996-2012            | birth - 4 years | 1679        |
| China: Anhui     | China National Notifiable Infectious Diseases Reporting Information System (NIDRIS)                         | Surveillance       |      | 2004-2014            | All Ages        | 2485        |
| China: Anhui     | China National Maternal and Child Health Surveillance System Maternal Mortality By Cause 1996-2005 - MCHS   | Surveillance       |      | 2006-2012            | 15 - 49 years   | MMR         |
| China: Anhui     | China National Maternal and Child Health Surveillance System Maternal Mortality By Cause 2013 - MCHS        | Surveillance       |      | 2013                 | 15 - 49 years   | MMR         |
| China: Anhui     | China National Maternal and Child Health Surveillance System Child Mortality By Cause 2013 - MCHS           | Surveillance       |      | 2013                 | birth - 4 years | 301         |
| China: Anhui     | China National Disease Surveillance Points (DSP)                                                            | Vital Registration |      | 2004-2007, 2013-2014 | All Ages        | 474546      |
| China: Anhui     | China Mortality Registration and Reporting System                                                           | Vital Registration |      | 2008-2012            | All Ages        | 486213      |
| China: Beijing   | China National Disease Surveillance Points (DSP)                                                            | Surveillance       |      | 1991-2002            | All Ages        | 6917        |
| China: Beijing   | China National Maternal and Child Health Surveillance System Maternal Mortality By Cause 2006-2012 - MCHS   | Surveillance       |      | 1996-1999, 2005      | 15 - 49 years   | MMR         |
| China: Beijing   | China National Maternal and Child Health Surveillance System Child Mortality Data By Cause 1996-2012 - MCHS | Surveillance       |      | 1996-2012            | birth - 4 years | 486         |
| China: Beijing   | China National Notifiable Infectious Diseases Reporting Information System (NIDRIS)                         | Surveillance       |      | 2004-2014            | All Ages        | 362         |
| China: Beijing   | China National Maternal and Child Health Surveillance System Maternal Mortality By Cause 1996-2005 - MCHS   | Surveillance       |      | 2006-2012            | 15 - 49 years   | MMR         |
| China: Beijing   | China National Maternal and Child Health Surveillance System Maternal Mortality By Cause 2013 - MCHS        | Surveillance       |      | 2013                 | 15 - 49 years   | MMR         |
| China: Beijing   | China National Maternal and Child Health Surveillance System Child Mortality By Cause 2013 - MCHS           | Surveillance       |      | 2013                 | birth - 4 years | 113         |
| China: Beijing   | China National Disease Surveillance Points (DSP)                                                            | Vital Registration |      | 2004-2007, 2013-2014 | All Ages        | 188252      |
| China: Beijing   | China Mortality Registration and Reporting System                                                           | Vital Registration |      | 2008-2012            | All Ages        | 368058      |
| China: Chongqing | China National Disease Surveillance Points (DSP)                                                            | Surveillance       |      | 1991-1998, 2000-2002 | All Ages        | 6106        |
| China: Chongqing | China National Maternal and Child Health Surveillance System Maternal Mortality By Cause 2006-2012 - MCHS   | Surveillance       |      | 1996-2005            | 15 - 49 years   | MMR         |
| China: Chongqing | China Maternal and Child Mortality Data 1996-2012 - China CDC                                               | Surveillance       |      | 1996-2012            | 15 - 49 years   | MMR         |
| China: Chongqing | China National Maternal and Child Health Surveillance System Child Mortality Data By Cause 1996-2012 - MCHS | Surveillance       |      | 1996-2012            | birth - 4 years | 812         |
| China: Chongqing | China National Notifiable Infectious Diseases Reporting Information System (NIDRIS)                         | Surveillance       |      | 2004-2014            | All Ages        | 5112        |
| China: Chongqing | China National Maternal and Child Health Surveillance System Maternal Mortality By Cause 1996-2005 - MCHS   | Surveillance       |      | 2006-2012            | 15 - 49 years   | MMR         |
| China: Chongqing | China National Maternal and Child Health Surveillance System Maternal Mortality By Cause 2013 - MCHS        | Surveillance       |      | 2013                 | 15 - 49 years   | MMR         |
| China: Chongqing | China National Maternal and Child Health Surveillance System Child Mortality By Cause 2013 - MCHS           | Surveillance       |      | 2013                 | birth - 4 years | 191         |
| China: Chongqing | China National Disease Surveillance Points (DSP)                                                            | Vital Registration |      | 2004-2007, 2013-2014 | All Ages        | 454936      |
| China: Chongqing | China Mortality Registration and Reporting System                                                           | Vital Registration |      | 2008-2012            | All Ages        | 479548      |
| China: Fujian    | China National Disease Surveillance Points (DSP)                                                            | Surveillance       |      | 1991-2002            | All Ages        | 16949       |
| China: Fujian    | China National Maternal and Child Health Surveillance System Maternal Mortality By Cause 2006-2012 - MCHS   | Surveillance       |      | 1996-2005            | 15 - 49 years   | MMR         |
| China: Fujian    | China National Maternal and Child Health Surveillance System Child Mortality Data By Cause 1996-2012 - MCHS | Surveillance       |      | 1996-2012            | birth - 4 years | 1516        |

**Appendix Table 6: Causes of death data source list by geography, source type, and study site, with years, age range, and sample size, excluding sources on lower respiratory infection and diarrhoea etiologies**

| Location         | Source name                                                                                                 | Source type        | Site | Years                | Ages            | Sample size |
|------------------|-------------------------------------------------------------------------------------------------------------|--------------------|------|----------------------|-----------------|-------------|
| China: Fujian    | China National Notifiable Infectious Diseases Reporting Information System (NIDRIS)                         | Surveillance       |      | 2004-2014            | All Ages        | 1336        |
| China: Fujian    | China National Maternal and Child Health Surveillance System Maternal Mortality By Cause 1996-2005 - MCHS   | Surveillance       |      | 2006-2012            | 15 - 49 years   | MMR         |
| China: Fujian    | China National Maternal and Child Health Surveillance System Maternal Mortality By Cause 2013 - MCHS        | Surveillance       |      | 2013                 | 15 - 49 years   | MMR         |
| China: Fujian    | China National Maternal and Child Health Surveillance System Child Mortality By Cause 2013 - MCHS           | Surveillance       |      | 2013                 | birth - 4 years | 245         |
| China: Fujian    | China National Disease Surveillance Points (DSP)                                                            | Vital Registration |      | 2004-2007, 2013-2014 | All Ages        | 190784      |
| China: Fujian    | China Mortality Registration and Reporting System                                                           | Vital Registration |      | 2008-2012            | All Ages        | 150451      |
| China: Gansu     | China National Disease Surveillance Points (DSP)                                                            | Surveillance       |      | 1991-2002            | All Ages        | 12155       |
| China: Gansu     | China National Maternal and Child Health Surveillance System Maternal Mortality By Cause 2006-2012 - MCHS   | Surveillance       |      | 1996-2005            | 15 - 49 years   | MMR         |
| China: Gansu     | China National Maternal and Child Health Surveillance System Child Mortality Data By Cause 1996-2012 - MCHS | Surveillance       |      | 1996-2012            | birth - 4 years | 1615        |
| China: Gansu     | China National Notifiable Infectious Diseases Reporting Information System (NIDRIS)                         | Surveillance       |      | 2004-2014            | All Ages        | 394         |
| China: Gansu     | China National Maternal and Child Health Surveillance System Maternal Mortality By Cause 1996-2005 - MCHS   | Surveillance       |      | 2006-2012            | 15 - 49 years   | MMR         |
| China: Gansu     | China National Maternal and Child Health Surveillance System Maternal Mortality By Cause 2013 - MCHS        | Surveillance       |      | 2013                 | 15 - 49 years   | MMR         |
| China: Gansu     | China National Maternal and Child Health Surveillance System Child Mortality By Cause 2013 - MCHS           | Surveillance       |      | 2013                 | birth - 4 years | 234         |
| China: Gansu     | China National Disease Surveillance Points (DSP)                                                            | Vital Registration |      | 2004-2007, 2013-2014 | All Ages        | 209705      |
| China: Gansu     | China Mortality Registration and Reporting System                                                           | Vital Registration |      | 2008-2012            | All Ages        | 100216      |
| China: Guangdong | China National Disease Surveillance Points (DSP)                                                            | Surveillance       |      | 1991-2002            | All Ages        | 27664       |
| China: Guangdong | China National Maternal and Child Health Surveillance System Maternal Mortality By Cause 2006-2012 - MCHS   | Surveillance       |      | 1996-2002, 2004-2005 | 15 - 49 years   | MMR         |
| China: Guangdong | China National Maternal and Child Health Surveillance System Child Mortality Data By Cause 1996-2012 - MCHS | Surveillance       |      | 1996-2012            | birth - 4 years | 1439        |
| China: Guangdong | China National Notifiable Infectious Diseases Reporting Information System (NIDRIS)                         | Surveillance       |      | 2004-2014            | All Ages        | 12129       |
| China: Guangdong | China National Maternal and Child Health Surveillance System Maternal Mortality By Cause 1996-2005 - MCHS   | Surveillance       |      | 2006-2012            | 15 - 49 years   | MMR         |
| China: Guangdong | China National Maternal and Child Health Surveillance System Maternal Mortality By Cause 2013 - MCHS        | Surveillance       |      | 2013                 | 15 - 49 years   | MMR         |
| China: Guangdong | China National Maternal and Child Health Surveillance System Child Mortality By Cause 2013 - MCHS           | Surveillance       |      | 2013                 | birth - 4 years | 331         |
| China: Guangdong | China National Disease Surveillance Points (DSP)                                                            | Vital Registration |      | 2004-2007, 2013-2014 | All Ages        | 505229      |
| China: Guangdong | China Mortality Registration and Reporting System                                                           | Vital Registration |      | 2008-2012            | All Ages        | 529075      |
| China: Guangxi   | China National Disease Surveillance Points (DSP)                                                            | Surveillance       |      | 1991-2002            | All Ages        | 23352       |
| China: Guangxi   | China National Maternal and Child Health Surveillance System Maternal Mortality By Cause 2006-2012 - MCHS   | Surveillance       |      | 1996-2005            | 15 - 49 years   | MMR         |
| China: Guangxi   | China National Maternal and Child Health Surveillance System Child Mortality Data By Cause 1996-2012 - MCHS | Surveillance       |      | 1996-2012            | birth - 4 years | 2147        |
| China: Guangxi   | China National Notifiable Infectious Diseases Reporting Information System (NIDRIS)                         | Surveillance       |      | 2004-2014            | All Ages        | 28123       |
| China: Guangxi   | China National Maternal and Child Health Surveillance System Maternal Mortality By Cause 1996-2005 - MCHS   | Surveillance       |      | 2006-2012            | 15 - 49 years   | MMR         |
| China: Guangxi   | China National Maternal and Child Health Surveillance System Maternal Mortality By Cause 2013 - MCHS        | Surveillance       |      | 2013                 | 15 - 49 years   | MMR         |

**Appendix Table 6: Causes of death data source list by geography, source type, and study site, with years, age range, and sample size, excluding sources on lower respiratory infection and diarrhoea etiologies**

| Location            | Source name                                                                                                 | Source type        | Site | Years                | Ages            | Sample size |
|---------------------|-------------------------------------------------------------------------------------------------------------|--------------------|------|----------------------|-----------------|-------------|
| China: Guangxi      | China National Maternal and Child Health Surveillance System Child Mortality By Cause 2013 - MCHS           | Surveillance       |      | 2013                 | birth - 4 years | 338         |
| China: Guangxi      | China National Disease Surveillance Points (DSP)                                                            | Vital Registration |      | 2004-2007, 2013-2014 | All Ages        | 331651      |
| China: Guangxi      | China Mortality Registration and Reporting System                                                           | Vital Registration |      | 2008-2012            | All Ages        | 192135      |
| China: Guizhou      | China National Disease Surveillance Points (DSP)                                                            | Surveillance       |      | 1991-2002            | All Ages        | 27954       |
| China: Guizhou      | China National Maternal and Child Health Surveillance System Maternal Mortality By Cause 2006-2012 - MCHS   | Surveillance       |      | 1996-2005            | 15 - 49 years   | MMR         |
| China: Guizhou      | China National Maternal and Child Health Surveillance System Child Mortality Data By Cause 1996-2012 - MCHS | Surveillance       |      | 1996-2012            | birth - 4 years | 3381        |
| China: Guizhou      | China National Notifiable Infectious Diseases Reporting Information System (NIDRIS)                         | Surveillance       |      | 2004-2014            | All Ages        | 8232        |
| China: Guizhou      | China National Maternal and Child Health Surveillance System Maternal Mortality By Cause 1996-2005 - MCHS   | Surveillance       |      | 2006-2012            | 15 - 49 years   | MMR         |
| China: Guizhou      | China National Maternal and Child Health Surveillance System Maternal Mortality By Cause 2013 - MCHS        | Surveillance       |      | 2013                 | 15 - 49 years   | MMR         |
| China: Guizhou      | China National Maternal and Child Health Surveillance System Child Mortality By Cause 2013 - MCHS           | Surveillance       |      | 2013                 | birth - 4 years | 357         |
| China: Guizhou      | China National Disease Surveillance Points (DSP)                                                            | Vital Registration |      | 2004-2007, 2013-2014 | All Ages        | 154702      |
| China: Guizhou      | China Mortality Registration and Reporting System                                                           | Vital Registration |      | 2008-2012            | All Ages        | 58640       |
| China: Hainan       | China National Disease Surveillance Points (DSP)                                                            | Surveillance       |      | 1991-2002            | All Ages        | 4055        |
| China: Hainan       | China National Maternal and Child Health Surveillance System Maternal Mortality By Cause 2006-2012 - MCHS   | Surveillance       |      | 1996-2005            | 15 - 49 years   | MMR         |
| China: Hainan       | China National Maternal and Child Health Surveillance System Child Mortality Data By Cause 1996-2012 - MCHS | Surveillance       |      | 1996-2012            | birth - 4 years | 1683        |
| China: Hainan       | China National Notifiable Infectious Diseases Reporting Information System (NIDRIS)                         | Surveillance       |      | 2004-2014            | All Ages        | 977         |
| China: Hainan       | China National Maternal and Child Health Surveillance System Maternal Mortality By Cause 1996-2005 - MCHS   | Surveillance       |      | 2006-2012            | 15 - 49 years   | MMR         |
| China: Hainan       | China National Maternal and Child Health Surveillance System Maternal Mortality By Cause 2013 - MCHS        | Surveillance       |      | 2013                 | 15 - 49 years   | MMR         |
| China: Hainan       | China National Maternal and Child Health Surveillance System Child Mortality By Cause 2013 - MCHS           | Surveillance       |      | 2013                 | birth - 4 years | 167         |
| China: Hainan       | China National Disease Surveillance Points (DSP)                                                            | Vital Registration |      | 2004-2007, 2013-2014 | All Ages        | 40858       |
| China: Hainan       | China Mortality Registration and Reporting System                                                           | Vital Registration |      | 2008-2012            | All Ages        | 14474       |
| China: Hebei        | China National Disease Surveillance Points (DSP)                                                            | Surveillance       |      | 1991-2002            | All Ages        | 22032       |
| China: Hebei        | China National Maternal and Child Health Surveillance System Maternal Mortality By Cause 2006-2012 - MCHS   | Surveillance       |      | 1996-2005            | 15 - 49 years   | MMR         |
| China: Hebei        | China National Maternal and Child Health Surveillance System Child Mortality Data By Cause 1996-2012 - MCHS | Surveillance       |      | 1996-2012            | birth - 4 years | 1105        |
| China: Hebei        | China National Notifiable Infectious Diseases Reporting Information System (NIDRIS)                         | Surveillance       |      | 2004-2014            | All Ages        | 1550        |
| China: Hebei        | China National Maternal and Child Health Surveillance System Maternal Mortality By Cause 1996-2005 - MCHS   | Surveillance       |      | 2006-2012            | 15 - 49 years   | MMR         |
| China: Hebei        | China National Maternal and Child Health Surveillance System Maternal Mortality By Cause 2013 - MCHS        | Surveillance       |      | 2013                 | 15 - 49 years   | MMR         |
| China: Hebei        | China National Maternal and Child Health Surveillance System Child Mortality By Cause 2013 - MCHS           | Surveillance       |      | 2013                 | birth - 4 years | 199         |
| China: Hebei        | China National Disease Surveillance Points (DSP)                                                            | Vital Registration |      | 2004-2007, 2013-2014 | All Ages        | 467306      |
| China: Hebei        | China Mortality Registration and Reporting System                                                           | Vital Registration |      | 2008-2012            | All Ages        | 311617      |
| China: Heilongjiang | China National Disease Surveillance Points (DSP)                                                            | Surveillance       |      | 1991-2002            | All Ages        | 12285       |

**Appendix Table 6: Causes of death data source list by geography, source type, and study site, with years, age range, and sample size, excluding sources on lower respiratory infection and diarrhoea etiologies**

| Location                                                | Source name                                                                                                 | Source type        | Site                                                                 | Years                | Ages            | Sample size |
|---------------------------------------------------------|-------------------------------------------------------------------------------------------------------------|--------------------|----------------------------------------------------------------------|----------------------|-----------------|-------------|
| China: Heilongjiang                                     | China National Maternal and Child Health Surveillance System Child Mortality Data By Cause 1996-2012 - MCHS | Surveillance       |                                                                      | 1996-2012            | birth - 4 years | 930         |
| China: Heilongjiang                                     | China National Maternal and Child Health Surveillance System Maternal Mortality By Cause 2006-2012 - MCHS   | Surveillance       |                                                                      | 1997-2002, 2004-2005 | 15 - 49 years   | MMR         |
| China: Heilongjiang                                     | China National Notifiable Infectious Diseases Reporting Information System (NIDRIS)                         | Surveillance       |                                                                      | 2004-2014            | All Ages        | 924         |
| China: Heilongjiang                                     | China National Maternal and Child Health Surveillance System Maternal Mortality By Cause 1996-2005 - MCHS   | Surveillance       |                                                                      | 2006-2012            | 15 - 49 years   | MMR         |
| China: Heilongjiang                                     | China National Maternal and Child Health Surveillance System Maternal Mortality By Cause 2013 - MCHS        | Surveillance       |                                                                      | 2013                 | 15 - 49 years   | MMR         |
| China: Heilongjiang                                     | China National Maternal and Child Health Surveillance System Child Mortality By Cause 2013 - MCHS           | Surveillance       |                                                                      | 2013                 | birth - 4 years | 101         |
| China: Heilongjiang                                     | China National Disease Surveillance Points (DSP)                                                            | Vital Registration |                                                                      | 2004-2007, 2013-2014 | All Ages        | 524404      |
| China: Heilongjiang                                     | China Mortality Registration and Reporting System                                                           | Vital Registration |                                                                      | 2008-2012            | All Ages        | 979278      |
| China: Henan                                            | China National Disease Surveillance Points (DSP)                                                            | Surveillance       |                                                                      | 1991-2002            | All Ages        | 35272       |
| China: Henan                                            | China National Maternal and Child Health Surveillance System Maternal Mortality By Cause 2006-2012 - MCHS   | Surveillance       |                                                                      | 1996-2005            | 15 - 49 years   | MMR         |
| China: Henan                                            | China National Maternal and Child Health Surveillance System Child Mortality Data By Cause 1996-2012 - MCHS | Surveillance       |                                                                      | 1996-2012            | birth - 4 years | 1850        |
| China: Henan                                            | China National Notifiable Infectious Diseases Reporting Information System (NIDRIS)                         | Surveillance       |                                                                      | 2004-2014            | All Ages        | 14827       |
| China: Henan                                            | China National Maternal and Child Health Surveillance System Maternal Mortality By Cause 1996-2005 - MCHS   | Surveillance       |                                                                      | 2006-2012            | 15 - 49 years   | MMR         |
| China: Henan                                            | China National Maternal and Child Health Surveillance System Maternal Mortality By Cause 2013 - MCHS        | Surveillance       |                                                                      | 2013                 | 15 - 49 years   | MMR         |
| China: Henan                                            | China National Maternal and Child Health Surveillance System Child Mortality By Cause 2013 - MCHS           | Surveillance       |                                                                      | 2013                 | birth - 4 years | 385         |
| China: Henan                                            | China National Disease Surveillance Points (DSP)                                                            | Vital Registration |                                                                      | 2004-2007, 2013-2014 | All Ages        | 902508      |
| China: Henan                                            | China Mortality Registration and Reporting System                                                           | Vital Registration |                                                                      | 2008-2012            | All Ages        | 680747      |
| China: Hong Kong Special Administrative Region of China | United Nations Office on Drugs and Crime Global Study on Homicide 2011                                      | Police Records     | Hong Kong Special Administrative Region of China CTS/National police | 1996                 | All Ages        | Death Rate  |
| China: Hong Kong Special Administrative Region of China | WHO Mortality Database                                                                                      | Vital Registration |                                                                      | 1980-2013            | All Ages        | 1118401     |
| China: Hubei                                            | China National Disease Surveillance Points (DSP)                                                            | Surveillance       |                                                                      | 1991-2002            | All Ages        | 28706       |
| China: Hubei                                            | China National Maternal and Child Health Surveillance System Maternal Mortality By Cause 2006-2012 - MCHS   | Surveillance       |                                                                      | 1996-2005            | 15 - 49 years   | MMR         |
| China: Hubei                                            | China National Maternal and Child Health Surveillance System Child Mortality Data By Cause 1996-2012 - MCHS | Surveillance       |                                                                      | 1996-2012            | birth - 4 years | 1348        |
| China: Hubei                                            | China National Notifiable Infectious Diseases Reporting Information System (NIDRIS)                         | Surveillance       |                                                                      | 2004-2014            | All Ages        | 3991        |
| China: Hubei                                            | China National Maternal and Child Health Surveillance System Maternal Mortality By Cause 1996-2005 - MCHS   | Surveillance       |                                                                      | 2006-2012            | 15 - 49 years   | MMR         |
| China: Hubei                                            | China National Maternal and Child Health Surveillance System Maternal Mortality By Cause 2013 - MCHS        | Surveillance       |                                                                      | 2013                 | 15 - 49 years   | MMR         |
| China: Hubei                                            | China National Maternal and Child Health Surveillance System Child Mortality By Cause 2013 - MCHS           | Surveillance       |                                                                      | 2013                 | birth - 4 years | 248         |
| China: Hubei                                            | China National Disease Surveillance Points (DSP)                                                            | Vital Registration |                                                                      | 2004-2007, 2013-2014 | All Ages        | 535964      |
| China: Hubei                                            | China Mortality Registration and Reporting System                                                           | Vital Registration |                                                                      | 2008-2012            | All Ages        | 329913      |
| China: Hunan                                            | China National Disease Surveillance Points (DSP)                                                            | Surveillance       |                                                                      | 1991-2002            | All Ages        | 48781       |
| China: Hunan                                            | China National Maternal and Child Health Surveillance System Maternal Mortality By Cause 2006-2012 - MCHS   | Surveillance       |                                                                      | 1996-2005            | 15 - 49 years   | MMR         |

**Appendix Table 6: Causes of death data source list by geography, source type, and study site, with years, age range, and sample size, excluding sources on lower respiratory infection and diarrhoea etiologies**

| Location              | Source name                                                                                                 | Source type        | Site | Years                | Ages            | Sample size |
|-----------------------|-------------------------------------------------------------------------------------------------------------|--------------------|------|----------------------|-----------------|-------------|
| China: Hunan          | China Maternal and Child Mortality Data 1996-2012 - China CDC                                               | Surveillance       |      | 1996-2012            | 15 - 49 years   | MMR         |
| China: Hunan          | China National Maternal and Child Health Surveillance System Child Mortality Data By Cause 1996-2012 - MCHS | Surveillance       |      | 1996-2012            | birth - 4 years | 1683        |
| China: Hunan          | China National Notifiable Infectious Diseases Reporting Information System (NIDRIS)                         | Surveillance       |      | 2004-2014            | All Ages        | 8441        |
| China: Hunan          | China National Maternal and Child Health Surveillance System Maternal Mortality By Cause 1996-2005 - MCHS   | Surveillance       |      | 2006-2012            | 15 - 49 years   | MMR         |
| China: Hunan          | China National Maternal and Child Health Surveillance System Maternal Mortality By Cause 2013 - MCHS        | Surveillance       |      | 2013                 | 15 - 49 years   | MMR         |
| China: Hunan          | China National Maternal and Child Health Surveillance System Child Mortality By Cause 2013 - MCHS           | Surveillance       |      | 2013                 | birth - 4 years | 322         |
| China: Hunan          | China National Disease Surveillance Points (DSP)                                                            | Vital Registration |      | 2004-2007, 2013-2014 | All Ages        | 732456      |
| China: Hunan          | China Mortality Registration and Reporting System                                                           | Vital Registration |      | 2008-2012            | All Ages        | 1238659     |
| China: Inner Mongolia | China National Disease Surveillance Points (DSP)                                                            | Surveillance       |      | 1991-2002            | All Ages        | 2625        |
| China: Inner Mongolia | China National Maternal and Child Health Surveillance System Maternal Mortality By Cause 2006-2012 - MCHS   | Surveillance       |      | 1996-2004            | 15 - 49 years   | MMR         |
| China: Inner Mongolia | China National Maternal and Child Health Surveillance System Child Mortality Data By Cause 1996-2012 - MCHS | Surveillance       |      | 1996-2012            | birth - 4 years | 2107        |
| China: Inner Mongolia | China National Notifiable Infectious Diseases Reporting Information System (NIDRIS)                         | Surveillance       |      | 2004-2014            | All Ages        | 297         |
| China: Inner Mongolia | China National Maternal and Child Health Surveillance System Maternal Mortality By Cause 1996-2005 - MCHS   | Surveillance       |      | 2006-2012            | 15 - 49 years   | MMR         |
| China: Inner Mongolia | China National Maternal and Child Health Surveillance System Maternal Mortality By Cause 2013 - MCHS        | Surveillance       |      | 2013                 | 15 - 49 years   | MMR         |
| China: Inner Mongolia | China National Maternal and Child Health Surveillance System Child Mortality By Cause 2013 - MCHS           | Surveillance       |      | 2013                 | birth - 4 years | 552         |
| China: Inner Mongolia | China National Disease Surveillance Points (DSP)                                                            | Vital Registration |      | 2004-2007, 2013-2014 | All Ages        | 212787      |
| China: Inner Mongolia | China Mortality Registration and Reporting System                                                           | Vital Registration |      | 2008-2012            | All Ages        | 293934      |
| China: Jiangsu        | China National Disease Surveillance Points (DSP)                                                            | Surveillance       |      | 1991-2002            | All Ages        | 41754       |
| China: Jiangsu        | China National Maternal and Child Health Surveillance System Maternal Mortality By Cause 2006-2012 - MCHS   | Surveillance       |      | 1996-2005            | 15 - 49 years   | MMR         |
| China: Jiangsu        | China National Maternal and Child Health Surveillance System Child Mortality Data By Cause 1996-2012 - MCHS | Surveillance       |      | 1996-2012            | birth - 4 years | 1255        |
| China: Jiangsu        | China National Notifiable Infectious Diseases Reporting Information System (NIDRIS)                         | Surveillance       |      | 2004-2014            | All Ages        | 2685        |
| China: Jiangsu        | China National Maternal and Child Health Surveillance System Maternal Mortality By Cause 1996-2005 - MCHS   | Surveillance       |      | 2006-2012            | 15 - 49 years   | MMR         |
| China: Jiangsu        | China National Maternal and Child Health Surveillance System Maternal Mortality By Cause 2013 - MCHS        | Surveillance       |      | 2013                 | 15 - 49 years   | MMR         |
| China: Jiangsu        | China National Maternal and Child Health Surveillance System Child Mortality By Cause 2013 - MCHS           | Surveillance       |      | 2013                 | birth - 4 years | 195         |
| China: Jiangsu        | China National Disease Surveillance Points (DSP)                                                            | Vital Registration |      | 2004-2007, 2013-2014 | All Ages        | 968850      |
| China: Jiangsu        | China Mortality Registration and Reporting System                                                           | Vital Registration |      | 2008-2012            | All Ages        | 1672122     |
| China: Jiangxi        | China National Disease Surveillance Points (DSP)                                                            | Surveillance       |      | 1991-2002            | All Ages        | 16150       |
| China: Jiangxi        | China National Maternal and Child Health Surveillance System Maternal Mortality By Cause 2006-2012 - MCHS   | Surveillance       |      | 1996-2005            | 15 - 49 years   | MMR         |
| China: Jiangxi        | China National Maternal and Child Health Surveillance System Child Mortality Data By Cause 1996-2012 - MCHS | Surveillance       |      | 1996-2012            | birth - 4 years | 2338        |
| China: Jiangxi        | China National Notifiable Infectious Diseases Reporting Information System (NIDRIS)                         | Surveillance       |      | 2004-2014            | All Ages        | 2768        |



**Appendix Table 6: Causes of death data source list by geography, source type, and study site, with years, age range, and sample size, excluding sources on lower respiratory infection and diarrhoea etiologies**

| Location                                            | Source name                                                                                                 | Source type        | Site | Years                 | Ages            | Sample size |
|-----------------------------------------------------|-------------------------------------------------------------------------------------------------------------|--------------------|------|-----------------------|-----------------|-------------|
| China: Jiangxi                                      | China National Maternal and Child Health Surveillance System Maternal Mortality By Cause 1996-2005 - MCHS   | Surveillance       |      | 2006-2012             | 15 - 49 years   | MMR         |
| China: Jiangxi                                      | China National Maternal and Child Health Surveillance System Maternal Mortality By Cause 2013 - MCHS        | Surveillance       |      | 2013                  | 15 - 49 years   | MMR         |
| China: Jiangxi                                      | China National Maternal and Child Health Surveillance System Child Mortality By Cause 2013 - MCHS           | Surveillance       |      | 2013                  | birth - 4 years | 248         |
| China: Jiangxi                                      | China National Disease Surveillance Points (DSP)                                                            | Vital Registration |      | 2004-2007, 2013-2014  | All Ages        | 281897      |
| China: Jiangxi                                      | China Mortality Registration and Reporting System                                                           | Vital Registration |      | 2008-2012             | All Ages        | 109159      |
| China: Jilin                                        | China National Disease Surveillance Points (DSP)                                                            | Surveillance       |      | 1991-2002             | All Ages        | 11179       |
| China: Jilin                                        | China National Maternal and Child Health Surveillance System Maternal Mortality By Cause 2006-2012 - MCHS   | Surveillance       |      | 1996-2001, 2003, 2005 | 15 - 49 years   | MMR         |
| China: Jilin                                        | China National Maternal and Child Health Surveillance System Child Mortality Data By Cause 1996-2012 - MCHS | Surveillance       |      | 1996-2012             | birth - 4 years | 906         |
| China: Jilin                                        | China National Notifiable Infectious Diseases Reporting Information System (NIDRIS)                         | Surveillance       |      | 2004-2014             | All Ages        | 750         |
| China: Jilin                                        | China National Maternal and Child Health Surveillance System Maternal Mortality By Cause 1996-2005 - MCHS   | Surveillance       |      | 2006-2012             | 15 - 49 years   | MMR         |
| China: Jilin                                        | China National Maternal and Child Health Surveillance System Maternal Mortality By Cause 2013 - MCHS        | Surveillance       |      | 2013                  | 15 - 49 years   | MMR         |
| China: Jilin                                        | China National Maternal and Child Health Surveillance System Child Mortality By Cause 2013 - MCHS           | Surveillance       |      | 2013                  | birth - 4 years | 148         |
| China: Jilin                                        | China National Disease Surveillance Points (DSP)                                                            | Vital Registration |      | 2004-2007, 2013-2014  | All Ages        | 280673      |
| China: Jilin                                        | China Mortality Registration and Reporting System                                                           | Vital Registration |      | 2008-2012             | All Ages        | 259826      |
| China: Liaoning                                     | China National Disease Surveillance Points (DSP)                                                            | Surveillance       |      | 1991-2002             | All Ages        | 15137       |
| China: Liaoning                                     | China National Maternal and Child Health Surveillance System Maternal Mortality By Cause 2006-2012 - MCHS   | Surveillance       |      | 1996-2000, 2002, 2005 | 15 - 49 years   | MMR         |
| China: Liaoning                                     | China National Maternal and Child Health Surveillance System Child Mortality Data By Cause 1996-2012 - MCHS | Surveillance       |      | 1996-2012             | birth - 4 years | 1122        |
| China: Liaoning                                     | China National Notifiable Infectious Diseases Reporting Information System (NIDRIS)                         | Surveillance       |      | 2004-2014             | All Ages        | 1124        |
| China: Liaoning                                     | China National Maternal and Child Health Surveillance System Maternal Mortality By Cause 1996-2005 - MCHS   | Surveillance       |      | 2006-2012             | 15 - 49 years   | MMR         |
| China: Liaoning                                     | China National Maternal and Child Health Surveillance System Maternal Mortality By Cause 2013 - MCHS        | Surveillance       |      | 2013                  | 15 - 49 years   | MMR         |
| China: Liaoning                                     | China National Maternal and Child Health Surveillance System Child Mortality By Cause 2013 - MCHS           | Surveillance       |      | 2013                  | birth - 4 years | 138         |
| China: Liaoning                                     | China National Disease Surveillance Points (DSP)                                                            | Vital Registration |      | 2004-2007, 2013-2014  | All Ages        | 556387      |
| China: Liaoning                                     | China Mortality Registration and Reporting System                                                           | Vital Registration |      | 2008-2012             | All Ages        | 840701      |
| China: Macao Special Administrative Region of China | WHO Mortality Database                                                                                      | Vital Registration |      | 1994                  | All Ages        | 1329        |
| China: Ningxia                                      | China National Disease Surveillance Points (DSP)                                                            | Surveillance       |      | 1991-2002             | All Ages        | 2103        |
| China: Ningxia                                      | China National Maternal and Child Health Surveillance System Maternal Mortality By Cause 2006-2012 - MCHS   | Surveillance       |      | 1996-2005             | 15 - 49 years   | MMR         |
| China: Ningxia                                      | China National Maternal and Child Health Surveillance System Child Mortality Data By Cause 1996-2012 - MCHS | Surveillance       |      | 1996-2012             | birth - 4 years | 2223        |
| China: Ningxia                                      | China National Notifiable Infectious Diseases Reporting Information System (NIDRIS)                         | Surveillance       |      | 2004-2014             | All Ages        | 156         |
| China: Ningxia                                      | China National Maternal and Child Health Surveillance System Maternal Mortality By Cause 1996-2005 - MCHS   | Surveillance       |      | 2006-2012             | 15 - 49 years   | MMR         |
| China: Ningxia                                      | China National Maternal and Child Health Surveillance System Maternal Mortality By Cause 2013 - MCHS        | Surveillance       |      | 2013                  | 15 - 49 years   | MMR         |



**Appendix Table 6: Causes of death data source list by geography, source type, and study site, with years, age range, and sample size, excluding sources on lower respiratory infection and diarrhoea etiologies**

| Location        | Source name                                                                                                 | Source type        | Site | Years                | Ages            | Sample size |
|-----------------|-------------------------------------------------------------------------------------------------------------|--------------------|------|----------------------|-----------------|-------------|
| China: Ningxia  | China National Maternal and Child Health Surveillance System Child Mortality By Cause 2013 - MCHS           | Surveillance       |      | 2013                 | birth - 4 years | 290         |
| China: Ningxia  | China National Disease Surveillance Points (DSP)                                                            | Vital Registration |      | 2004-2007, 2013-2014 | All Ages        | 66009       |
| China: Ningxia  | China Mortality Registration and Reporting System                                                           | Vital Registration |      | 2008-2012            | All Ages        | 102318      |
| China: Qinghai  | China National Disease Surveillance Points (DSP)                                                            | Surveillance       |      | 1991-2002            | All Ages        | 5051        |
| China: Qinghai  | China National Maternal and Child Health Surveillance System Maternal Mortality By Cause 2006-2012 - MCHS   | Surveillance       |      | 1996-2005            | 15 - 49 years   | MMR         |
| China: Qinghai  | China National Maternal and Child Health Surveillance System Child Mortality Data By Cause 1996-2012 - MCHS | Surveillance       |      | 1996-2012            | birth - 4 years | 2400        |
| China: Qinghai  | China National Notifiable Infectious Diseases Reporting Information System (NIDRIS)                         | Surveillance       |      | 2004, 2006-2014      | All Ages        | 154         |
| China: Qinghai  | China National Maternal and Child Health Surveillance System Maternal Mortality By Cause 1996-2005 - MCHS   | Surveillance       |      | 2006-2012            | 15 - 49 years   | MMR         |
| China: Qinghai  | China National Maternal and Child Health Surveillance System Maternal Mortality By Cause 2013 - MCHS        | Surveillance       |      | 2013                 | 15 - 49 years   | MMR         |
| China: Qinghai  | China National Maternal and Child Health Surveillance System Child Mortality By Cause 2013 - MCHS           | Surveillance       |      | 2013                 | birth - 4 years | 233         |
| China: Qinghai  | China National Disease Surveillance Points (DSP)                                                            | Vital Registration |      | 2004-2007, 2013-2014 | All Ages        | 49910       |
| China: Qinghai  | China Mortality Registration and Reporting System                                                           | Vital Registration |      | 2008-2012            | All Ages        | 78790       |
| China: Shaanxi  | China National Disease Surveillance Points (DSP)                                                            | Surveillance       |      | 1991-2002            | All Ages        | 17071       |
| China: Shaanxi  | China National Maternal and Child Health Surveillance System Maternal Mortality By Cause 2006-2012 - MCHS   | Surveillance       |      | 1996-2005            | 15 - 49 years   | MMR         |
| China: Shaanxi  | China National Maternal and Child Health Surveillance System Child Mortality Data By Cause 1996-2012 - MCHS | Surveillance       |      | 1996-2012            | birth - 4 years | 1272        |
| China: Shaanxi  | China National Notifiable Infectious Diseases Reporting Information System (NIDRIS)                         | Surveillance       |      | 2004-2014            | All Ages        | 1169        |
| China: Shaanxi  | China National Maternal and Child Health Surveillance System Maternal Mortality By Cause 1996-2005 - MCHS   | Surveillance       |      | 2006-2012            | 15 - 49 years   | MMR         |
| China: Shaanxi  | China National Maternal and Child Health Surveillance System Maternal Mortality By Cause 2013 - MCHS        | Surveillance       |      | 2013                 | 15 - 49 years   | MMR         |
| China: Shaanxi  | China National Maternal and Child Health Surveillance System Child Mortality By Cause 2013 - MCHS           | Surveillance       |      | 2013                 | birth - 4 years | 170         |
| China: Shaanxi  | China National Disease Surveillance Points (DSP)                                                            | Vital Registration |      | 2004-2007, 2013-2014 | All Ages        | 216684      |
| China: Shaanxi  | China Mortality Registration and Reporting System                                                           | Vital Registration |      | 2008-2012            | All Ages        | 138787      |
| China: Shandong | China National Disease Surveillance Points (DSP)                                                            | Surveillance       |      | 1991-2002            | All Ages        | 47142       |
| China: Shandong | China National Maternal and Child Health Surveillance System Maternal Mortality By Cause 2006-2012 - MCHS   | Surveillance       |      | 1996-2005            | 15 - 49 years   | MMR         |
| China: Shandong | China National Maternal and Child Health Surveillance System Child Mortality Data By Cause 1996-2012 - MCHS | Surveillance       |      | 1996-2012            | birth - 4 years | 2045        |
| China: Shandong | China National Notifiable Infectious Diseases Reporting Information System (NIDRIS)                         | Surveillance       |      | 2004-2014            | All Ages        | 1949        |
| China: Shandong | China National Maternal and Child Health Surveillance System Maternal Mortality By Cause 1996-2005 - MCHS   | Surveillance       |      | 2006-2012            | 15 - 49 years   | MMR         |
| China: Shandong | China National Maternal and Child Health Surveillance System Maternal Mortality By Cause 2013 - MCHS        | Surveillance       |      | 2013                 | 15 - 49 years   | MMR         |
| China: Shandong | China National Maternal and Child Health Surveillance System Child Mortality By Cause 2013 - MCHS           | Surveillance       |      | 2013                 | birth - 4 years | 242         |
| China: Shandong | China National Disease Surveillance Points (DSP)                                                            | Vital Registration |      | 2004-2007, 2013-2014 | All Ages        | 1350124     |
| China: Shandong | China Mortality Registration and Reporting System                                                           | Vital Registration |      | 2008-2012            | All Ages        | 1603052     |
| China: Shanghai | China National Disease Surveillance Points (DSP)                                                            | Surveillance       |      | 1991-2002            | All Ages        | 10752       |

**Appendix Table 6: Causes of death data source list by geography, source type, and study site, with years, age range, and sample size, excluding sources on lower respiratory infection and diarrhoea etiologies**

| Location        | Source name                                                                                                 | Source type        | Site | Years                      | Ages            | Sample size |
|-----------------|-------------------------------------------------------------------------------------------------------------|--------------------|------|----------------------------|-----------------|-------------|
| China: Shanghai | China National Maternal and Child Health Surveillance System Child Mortality Data By Cause 1996-2012 - MCHS | Surveillance       |      | 1996-2012                  | birth - 4 years | 203         |
| China: Shanghai | China National Maternal and Child Health Surveillance System Maternal Mortality By Cause 2006-2012 - MCHS   | Surveillance       |      | 1998, 2002                 | 15 - 49 years   | MMR         |
| China: Shanghai | China National Notifiable Infectious Diseases Reporting Information System (NIDRIS)                         | Surveillance       |      | 2004-2014                  | All Ages        | 550         |
| China: Shanghai | China National Maternal and Child Health Surveillance System Maternal Mortality By Cause 1996-2005 - MCHS   | Surveillance       |      | 2007-2012                  | 15 - 49 years   | MMR         |
| China: Shanghai | China National Maternal and Child Health Surveillance System Maternal Mortality By Cause 2013 - MCHS        | Surveillance       |      | 2013                       | 15 - 49 years   | MMR         |
| China: Shanghai | China National Maternal and Child Health Surveillance System Child Mortality By Cause 2013 - MCHS           | Surveillance       |      | 2013                       | birth - 4 years | 57          |
| China: Shanghai | China National Disease Surveillance Points (DSP)                                                            | Vital Registration |      | 2004-2007, 2013-2014       | All Ages        | 193785      |
| China: Shanghai | China Mortality Registration and Reporting System                                                           | Vital Registration |      | 2008-2012                  | All Ages        | 430556      |
| China: Shanxi   | China National Disease Surveillance Points (DSP)                                                            | Surveillance       |      | 1991-2002                  | All Ages        | 16557       |
| China: Shanxi   | China National Maternal and Child Health Surveillance System Maternal Mortality By Cause 2006-2012 - MCHS   | Surveillance       |      | 1996-2005                  | 15 - 49 years   | MMR         |
| China: Shanxi   | China National Maternal and Child Health Surveillance System Child Mortality Data By Cause 1996-2012 - MCHS | Surveillance       |      | 1996-2012                  | birth - 4 years | 1519        |
| China: Shanxi   | China National Notifiable Infectious Diseases Reporting Information System (NIDRIS)                         | Surveillance       |      | 2004-2014                  | All Ages        | 1357        |
| China: Shanxi   | China National Maternal and Child Health Surveillance System Maternal Mortality By Cause 1996-2005 - MCHS   | Surveillance       |      | 2006-2012                  | 15 - 49 years   | MMR         |
| China: Shanxi   | China National Maternal and Child Health Surveillance System Maternal Mortality By Cause 2013 - MCHS        | Surveillance       |      | 2013                       | 15 - 49 years   | MMR         |
| China: Shanxi   | China National Maternal and Child Health Surveillance System Child Mortality By Cause 2013 - MCHS           | Surveillance       |      | 2013                       | birth - 4 years | 262         |
| China: Shanxi   | China National Disease Surveillance Points (DSP)                                                            | Vital Registration |      | 2004-2007, 2013-2014       | All Ages        | 271193      |
| China: Shanxi   | China Mortality Registration and Reporting System                                                           | Vital Registration |      | 2008-2012                  | All Ages        | 266229      |
| China: Sichuan  | China National Disease Surveillance Points (DSP)                                                            | Surveillance       |      | 1991-2002                  | All Ages        | 33618       |
| China: Sichuan  | China National Maternal and Child Health Surveillance System Maternal Mortality By Cause 2006-2012 - MCHS   | Surveillance       |      | 1996-2005                  | 15 - 49 years   | MMR         |
| China: Sichuan  | China National Maternal and Child Health Surveillance System Child Mortality Data By Cause 1996-2012 - MCHS | Surveillance       |      | 1996-2012                  | birth - 4 years | 2185        |
| China: Sichuan  | China National Notifiable Infectious Diseases Reporting Information System (NIDRIS)                         | Surveillance       |      | 2004-2014                  | All Ages        | 17761       |
| China: Sichuan  | China National Maternal and Child Health Surveillance System Maternal Mortality By Cause 1996-2005 - MCHS   | Surveillance       |      | 2006-2012                  | 15 - 49 years   | MMR         |
| China: Sichuan  | China National Maternal and Child Health Surveillance System Maternal Mortality By Cause 2013 - MCHS        | Surveillance       |      | 2013                       | 15 - 49 years   | MMR         |
| China: Sichuan  | China National Maternal and Child Health Surveillance System Child Mortality By Cause 2013 - MCHS           | Surveillance       |      | 2013                       | birth - 4 years | 211         |
| China: Sichuan  | China National Disease Surveillance Points (DSP)                                                            | Vital Registration |      | 2004-2007, 2013-2014       | All Ages        | 941026      |
| China: Sichuan  | China Mortality Registration and Reporting System                                                           | Vital Registration |      | 2008-2012                  | All Ages        | 1130413     |
| China: Tianjin  | China National Disease Surveillance Points (DSP)                                                            | Surveillance       |      | 1991-1998                  | All Ages        | 4560        |
| China: Tianjin  | China National Maternal and Child Health Surveillance System Maternal Mortality By Cause 2006-2012 - MCHS   | Surveillance       |      | 1996-1997, 1999, 2003-2005 | 15 - 49 years   | MMR         |
| China: Tianjin  | China National Maternal and Child Health Surveillance System Child Mortality Data By Cause 1996-2012 - MCHS | Surveillance       |      | 1996-2012                  | birth - 4 years | 548         |
| China: Tianjin  | China National Disease Surveillance Points (DSP)                                                            | Surveillance       |      | 2000-2002                  | 5 years +       | 627         |
| China: Tianjin  | China National Notifiable Infectious Diseases Reporting Information System (NIDRIS)                         | Surveillance       |      | 2004-2014                  | All Ages        | 314         |

**Appendix Table 6: Causes of death data source list by geography, source type, and study site, with years, age range, and sample size, excluding sources on lower respiratory infection and diarrhoea etiologies**

| Location        | Source name                                                                                                 | Source type        | Site | Years                | Ages            | Sample size |
|-----------------|-------------------------------------------------------------------------------------------------------------|--------------------|------|----------------------|-----------------|-------------|
| China: Tianjin  | China National Maternal and Child Health Surveillance System Maternal Mortality By Cause 1996-2005 - MCHS   | Surveillance       |      | 2006-2012            | 15 - 49 years   | MMR         |
| China: Tianjin  | China National Maternal and Child Health Surveillance System Maternal Mortality By Cause 2013 - MCHS        | Surveillance       |      | 2013                 | 15 - 49 years   | MMR         |
| China: Tianjin  | China National Maternal and Child Health Surveillance System Child Mortality By Cause 2013 - MCHS           | Surveillance       |      | 2013                 | birth - 4 years | 140         |
| China: Tianjin  | China National Disease Surveillance Points (DSP)                                                            | Vital Registration |      | 2004-2007, 2013-2014 | All Ages        | 179925      |
| China: Tianjin  | China Mortality Registration and Reporting System                                                           | Vital Registration |      | 2008-2012            | All Ages        | 325255      |
| China: Tibet    | China National Disease Surveillance Points (DSP)                                                            | Surveillance       |      | 1991-2002            | All Ages        | 3965        |
| China: Tibet    | China Maternal and Child Mortality Data 1996-2012 - China CDC                                               | Surveillance       |      | 1996-2012            | 15 - 49 years   | MMR         |
| China: Tibet    | China National Maternal and Child Health Surveillance System Child Mortality Data By Cause 1996-2012 - MCHS | Surveillance       |      | 1996-2012            | birth - 4 years | 1617        |
| China: Tibet    | China National Maternal and Child Health Surveillance System Maternal Mortality By Cause 2006-2012 - MCHS   | Surveillance       |      | 1997-2001, 2003-2005 | 15 - 49 years   | MMR         |
| China: Tibet    | China National Maternal and Child Health Surveillance System Maternal Mortality By Cause 1996-2005 - MCHS   | Surveillance       |      | 2006-2012            | 15 - 49 years   | MMR         |
| China: Tibet    | China National Notifiable Infectious Diseases Reporting Information System (NIDRIS)                         | Surveillance       |      | 2006-2014            | All Ages        | 44          |
| China: Tibet    | China National Maternal and Child Health Surveillance System Maternal Mortality By Cause 2013 - MCHS        | Surveillance       |      | 2013                 | 15 - 49 years   | MMR         |
| China: Tibet    | China National Maternal and Child Health Surveillance System Child Mortality By Cause 2013 - MCHS           | Surveillance       |      | 2013                 | birth - 4 years | 301         |
| China: Tibet    | China National Disease Surveillance Points (DSP)                                                            | Vital Registration |      | 2004-2007, 2013-2014 | All Ages        | 10955       |
| China: Tibet    | China Mortality Registration and Reporting System                                                           | Vital Registration |      | 2008-2012            | All Ages        | 5645        |
| China: Xinjiang | China National Disease Surveillance Points (DSP)                                                            | Surveillance       |      | 1991-2000, 2002      | All Ages        | 5930        |
| China: Xinjiang | China National Maternal and Child Health Surveillance System Maternal Mortality By Cause 2006-2012 - MCHS   | Surveillance       |      | 1996-2005            | 15 - 49 years   | MMR         |
| China: Xinjiang | China National Maternal and Child Health Surveillance System Child Mortality Data By Cause 1996-2012 - MCHS | Surveillance       |      | 1996-2012            | birth - 4 years | 4762        |
| China: Xinjiang | China National Notifiable Infectious Diseases Reporting Information System (NIDRIS)                         | Surveillance       |      | 2004-2014            | All Ages        | 5970        |
| China: Xinjiang | China National Maternal and Child Health Surveillance System Maternal Mortality By Cause 1996-2005 - MCHS   | Surveillance       |      | 2006-2012            | 15 - 49 years   | MMR         |
| China: Xinjiang | China National Maternal and Child Health Surveillance System Maternal Mortality By Cause 2013 - MCHS        | Surveillance       |      | 2013                 | 15 - 49 years   | MMR         |
| China: Xinjiang | China National Maternal and Child Health Surveillance System Child Mortality By Cause 2013 - MCHS           | Surveillance       |      | 2013                 | birth - 4 years | 1314        |
| China: Xinjiang | China National Disease Surveillance Points (DSP)                                                            | Vital Registration |      | 2004-2007, 2013-2014 | All Ages        | 104589      |
| China: Xinjiang | China Mortality Registration and Reporting System                                                           | Vital Registration |      | 2008-2012            | All Ages        | 82471       |
| China: Yunnan   | China National Disease Surveillance Points (DSP)                                                            | Surveillance       |      | 1991-2002            | All Ages        | 28419       |
| China: Yunnan   | China National Maternal and Child Health Surveillance System Maternal Mortality By Cause 2006-2012 - MCHS   | Surveillance       |      | 1996-2005            | 15 - 49 years   | MMR         |
| China: Yunnan   | China National Maternal and Child Health Surveillance System Child Mortality Data By Cause 1996-2012 - MCHS | Surveillance       |      | 1996-2012            | birth - 4 years | 3312        |
| China: Yunnan   | China National Notifiable Infectious Diseases Reporting Information System (NIDRIS)                         | Surveillance       |      | 2004-2014            | All Ages        | 20608       |
| China: Yunnan   | China National Maternal and Child Health Surveillance System Maternal Mortality By Cause 1996-2005 - MCHS   | Surveillance       |      | 2006-2012            | 15 - 49 years   | MMR         |
| China: Yunnan   | China National Maternal and Child Health Surveillance System Maternal Mortality By Cause 2013 - MCHS        | Surveillance       |      | 2013                 | 15 - 49 years   | MMR         |

**Appendix Table 6: Causes of death data source list by geography, source type, and study site, with years, age range, and sample size, excluding sources on lower respiratory infection and diarrhoea etiologies**

| Location        | Source name                                                                                                 | Source type        | Site                                                                   | Years                | Ages             | Sample size |
|-----------------|-------------------------------------------------------------------------------------------------------------|--------------------|------------------------------------------------------------------------|----------------------|------------------|-------------|
| China: Yunnan   | China National Maternal and Child Health Surveillance System Child Mortality By Cause 2013 - MCHS           | Surveillance       |                                                                        | 2013                 | birth - 4 years  | 786         |
| China: Yunnan   | China National Disease Surveillance Points (DSP)                                                            | Vital Registration |                                                                        | 2004-2007, 2013-2014 | All Ages         | 442057      |
| China: Yunnan   | China Mortality Registration and Reporting System                                                           | Vital Registration |                                                                        | 2008-2012            | All Ages         | 561260      |
| China: Zhejiang | China National Disease Surveillance Points (DSP)                                                            | Surveillance       |                                                                        | 1991-2002            | All Ages         | 27130       |
| China: Zhejiang | China National Maternal and Child Health Surveillance System Maternal Mortality By Cause 2006-2012 - MCHS   | Surveillance       |                                                                        | 1996-1997, 1999-2005 | 15 - 49 years    | MMR         |
| China: Zhejiang | China National Maternal and Child Health Surveillance System Child Mortality Data By Cause 1996-2012 - MCHS | Surveillance       |                                                                        | 1996-2012            | birth - 4 years  | 788         |
| China: Zhejiang | China National Notifiable Infectious Diseases Reporting Information System (NIDRIS)                         | Surveillance       |                                                                        | 2004-2014            | All Ages         | 1533        |
| China: Zhejiang | China National Maternal and Child Health Surveillance System Maternal Mortality By Cause 1996-2005 - MCHS   | Surveillance       |                                                                        | 2007-2012            | 15 - 49 years    | MMR         |
| China: Zhejiang | China National Maternal and Child Health Surveillance System Maternal Mortality By Cause 2013 - MCHS        | Surveillance       |                                                                        | 2013                 | 15 - 49 years    | MMR         |
| China: Zhejiang | China National Maternal and Child Health Surveillance System Child Mortality By Cause 2013 - MCHS           | Surveillance       |                                                                        | 2013                 | birth - 4 years  | 86          |
| China: Zhejiang | China National Disease Surveillance Points (DSP)                                                            | Vital Registration |                                                                        | 2004-2007, 2013-2014 | All Ages         | 239871      |
| China: Zhejiang | China Mortality Registration and Reporting System                                                           | Vital Registration |                                                                        | 2008-2012            | All Ages         | 193637      |
| North Korea     | Korea, North Population Census 2008                                                                         | Survey/Census      |                                                                        | 2008                 | 15 - 49 years    | MMR         |
| Taiwan          | United Nations Office on Drugs and Crime Global Study on Homicide 2011                                      | Police Records     | Taiwan NSO                                                             | 1995-2007, 2009      | All Ages         | Death Rate  |
| Taiwan          | Taiwan Annual Statistical Summary of Causes of Death 1994                                                   | Vital Registration |                                                                        | 1994                 | All Ages         | 109985      |
| Taiwan          | Taiwan Statistics of Causes of Death                                                                        | Vital Registration |                                                                        | 1995-2006, 2008-2012 | All Ages         | 2188481     |
| Taiwan          | Taiwan Vital Statistics - Deaths 2007                                                                       | Vital Registration |                                                                        | 2007                 | All Ages         | 138966      |
| Cambodia        | United Nations Office on Drugs and Crime Global Study on Homicide 2011                                      | Police Records     | Cambodia NGO (e)                                                       | 1995-2005            | All Ages         | Death Rate  |
| Cambodia        | Cambodia Demographic and Health Survey - Maternal Mortality Data                                            | Sibling History    |                                                                        | 1986-2014            | 15 - 49 years    | 36          |
| Cambodia        | Comparing two survey methods for estimating maternal and perinatal mortality in rural Cambodia              | Sibling History    | Pailin and Battambang                                                  | 2004                 | 15 - 49 years    | MMR         |
| Cambodia        | Cambodia Socioeconomic Survey                                                                               | Survey/Census      |                                                                        | 2004                 | All Ages         | 501         |
| Cambodia        | Cambodia Census 2008                                                                                        | Survey/Census      |                                                                        | 2008                 | birth - 79 years | CF          |
| Cambodia        | Community-based surveillance: a pilot study from rural Cambodia                                             | Verbal Autopsy     | Trang Ta Saen Boeng Reang Preah Rumkel Chan Mul Choam Pir Thnu [rural] | 2001                 | All Ages         | 445         |
| Indonesia       | United Nations Surveys on Crime Trends and the Operations of Criminal Justice Systems 1970-2006             | Police Records     |                                                                        | 1981-1984, 1986      | All Ages         | Death Rate  |
| Indonesia       | United Nations Office on Drugs and Crime Global Study on Homicide 2011                                      | Police Records     | Indonesia Interpol                                                     | 2003-2004            | All Ages         | Death Rate  |
| Indonesia       | Global Status Report on Road Safety 2009                                                                    | Police Records     |                                                                        | 2007                 | All Ages         | Death Rate  |
| Indonesia       | Indonesia Demographic and Health Survey - Maternal Mortality Data                                           | Sibling History    |                                                                        | 1980-2012            | 15 - 49 years    | 250         |
| Indonesia       | Indonesia National Socioeconomic Survey (SUSENAS)                                                           | Survey/Census      | 2007                                                                   | 2001                 | birth - 27 days  | 1           |
| Indonesia       | Indonesia National Socioeconomic Survey (SUSENAS)                                                           | Survey/Census      | 2004                                                                   | 2001-2004            | All Ages         | 8093        |
| Indonesia       | Indonesia National Socioeconomic Survey (SUSENAS)                                                           | Survey/Census      | 2007                                                                   | 2004-2007            | All Ages         | 16930       |
| Indonesia       | Reproductive Mortality in Two Developing Countries                                                          | Verbal Autopsy     | rural Bali                                                             | 1981                 | 15 - 49 years    | 1215        |

**Appendix Table 6: Causes of death data source list by geography, source type, and study site, with years, age range, and sample size, excluding sources on lower respiratory infection and diarrhoea etiologies**

| Location  | Source name                                                                                                                                                                                                 | Source type        | Site                                                             | Years                           | Ages             | Sample size |
|-----------|-------------------------------------------------------------------------------------------------------------------------------------------------------------------------------------------------------------|--------------------|------------------------------------------------------------------|---------------------------------|------------------|-------------|
| Indonesia | The incidence of diarrhoeal diseases and diarrhoeal diseases related mortality in rural swampy low-land area of south Sumatra, Indonesia                                                                    | Verbal Autopsy     |                                                                  | 1983                            | All Ages         | 68          |
| Indonesia | The pattern of the causes of death in children in rural swampy area of South Sumatra, Indonesia                                                                                                             | Verbal Autopsy     |                                                                  | 1984                            | birth - 364 days | 29          |
| Indonesia | Efficacy of vitamin A in reducing preschool child mortality in Nepal                                                                                                                                        | Verbal Autopsy     | Terai district of Sarlahi [rural]                                | 1989                            | birth - 4 years  | 358         |
| Indonesia | Care-seeking for fatal illnesses in young children in Indramayu, West Java, Indonesia                                                                                                                       | Verbal Autopsy     | Indramayu [rural]                                                | 1991                            | birth - 4 years  | 141         |
| Indonesia | Age- and cause-specific childhood mortality in Lombok, Indonesia, as a factor for determining the appropriateness of introducing Haemophilus influenzae type b and pneumococcal vaccines                    | Verbal Autopsy     | Lombok                                                           | 1997                            | birth - 27 days  | 60          |
| Indonesia | A district-based audit of the causes and circumstances of maternal deaths in South Kalimantan, Indonesia                                                                                                    | Verbal Autopsy     | rural South Kalimantan - Banjar Barito Kuala Hulu Sangai Seletan | 1997                            | 15 - 49 years    | MMR         |
| Indonesia | Demographic Surveillance System (DSS)                                                                                                                                                                       | Verbal Autopsy     |                                                                  | 2000-2002                       | All Ages         | 1948        |
| Indonesia | Indonesia Sample Registration System 2012, Indonesia Cause of Death Survey 2010-2011, Indonesia Mortality Registration System Strengthening Project (IMRSSP), and Indonesia Basic Health Research 2007-2008 | Verbal Autopsy     | VA sites combined                                                | 2010                            | All Ages         | 23609       |
| Indonesia | Indonesia Sample Registration System Verbal Autopsy Data 2014                                                                                                                                               | Verbal Autopsy     |                                                                  | 2014                            | All Ages         | 41590       |
| Laos      | United Nations Office on Drugs and Crime Global Study on Homicide 2011                                                                                                                                      | Police Records     | Laos National police                                             | 2010                            | All Ages         | Death Rate  |
| Laos      | Laos Census 1995                                                                                                                                                                                            | Survey/Census      |                                                                  | 1995                            | 15 - 49 years    | 4007        |
| Laos      | Laos Census 2005                                                                                                                                                                                            | Survey/Census      |                                                                  | 2005                            | 15 - 49 years    | 5308        |
| Laos      | The Lao People's Democratic Republic: maternal mortality and female mortality: determining causes of deaths                                                                                                 | Verbal Autopsy     |                                                                  | 1989                            | 15 - 49 years    | 380         |
| Malaysia  | United Nations Surveys on Crime Trends and the Operations of Criminal Justice Systems 1970-2006                                                                                                             | Police Records     |                                                                  | 1981-1984, 1986, 1990-1994      | All Ages         | Death Rate  |
| Malaysia  | United Nations Office on Drugs and Crime Global Study on Homicide 2011                                                                                                                                      | Police Records     | Malaysia CTS                                                     | 1995-1996                       | All Ages         | Death Rate  |
| Malaysia  | World Health Survey (WHS)                                                                                                                                                                                   | Survey/Census      |                                                                  | 1997                            | All Ages         | 20          |
| Malaysia  | Malaysia - Peninsular Vital Statistics                                                                                                                                                                      | Vital Registration | Peninsular Malaysia                                              | 1980-1982                       | All Ages         | 71086       |
| Malaysia  | WHO Mortality Database                                                                                                                                                                                      | Vital Registration |                                                                  | 1997, 2000-2008                 | All Ages         | 617571      |
| Malaysia  | Malaysia - Peninsular Vital Statistics                                                                                                                                                                      | Vital Registration |                                                                  | 1998                            | All Ages         | 43585       |
| Maldives  | United Nations Surveys on Crime Trends and the Operations of Criminal Justice Systems 1970-2006                                                                                                             | Police Records     |                                                                  | 1986-1990                       | All Ages         | Death Rate  |
| Maldives  | United Nations Office on Drugs and Crime Global Study on Homicide 2011                                                                                                                                      | Police Records     | Maldives CTS                                                     | 1995, 1997, 2001-2002, 2007     | All Ages         | Death Rate  |
| Maldives  | Global Status Report on Road Safety 2009                                                                                                                                                                    | Police Records     |                                                                  | 2007                            | All Ages         | Death Rate  |
| Maldives  | WHO Mortality Database                                                                                                                                                                                      | Vital Registration |                                                                  | 2000-2005, 2007-2008, 2010-2011 | All Ages         | 10597       |
| Mauritius | United Nations Surveys on Crime Trends and the Operations of Criminal Justice Systems 1970-2006                                                                                                             | Police Records     |                                                                  | 1987, 1989-1994                 | All Ages         | Death Rate  |
| Mauritius | United Nations Office on Drugs and Crime Global Study on Homicide 2011                                                                                                                                      | Police Records     | Mauritius CTS                                                    | 1995-2003, 2007, 2009           | All Ages         | Death Rate  |
| Mauritius | United Nations Office on Drugs and Crime Global Study on Homicide 2011                                                                                                                                      | Police Records     | Mauritius WHO-MDB                                                | 1998-2003, 2007                 | All Ages         | Death Rate  |
| Mauritius | WHO Mortality Database                                                                                                                                                                                      | Vital Registration |                                                                  | 1980-2014                       | All Ages         | 268115      |
| Myanmar   | United Nations Office on Drugs and Crime Global Study on Homicide 2011                                                                                                                                      | Police Records     | Myanmar NSO                                                      | 1995, 2000-2007                 | All Ages         | Death Rate  |

**Appendix Table 6: Causes of death data source list by geography, source type, and study site, with years, age range, and sample size, excluding sources on lower respiratory infection and diarrhoea etiologies**

| Location    | Source name                                                                                                                                    | Source type        | Site                                                                 | Years                                      | Ages             | Sample size |
|-------------|------------------------------------------------------------------------------------------------------------------------------------------------|--------------------|----------------------------------------------------------------------|--------------------------------------------|------------------|-------------|
| Myanmar     | Cause of Death Verification Study in Myanmar                                                                                                   | Verbal Autopsy     | Pyinmana Township                                                    | 2007                                       | All Ages         | 1775        |
| Myanmar     | Effects of malaria volunteer training on coverage and timeliness of diagnosis: a cluster randomized controlled trial in Myanmar                | Verbal Autopsy     | Bago Daik-U KyaukTaGar Oktwin Taungoo and YeDarShay townships        | 2009                                       | All Ages         | 61          |
| Philippines | United Nations Office on Drugs and Crime Global Study on Homicide 2011                                                                         | Police Records     | Philippines CTS                                                      | 2009                                       | All Ages         | Death Rate  |
| Philippines | Philippines Demographic and Health Survey - Maternal Mortality Data                                                                            | Sibling History    |                                                                      | 1980-1998                                  | 15 - 54 years    | 214         |
| Philippines | Philippines Field Health Services Information System (FHSIS)                                                                                   | Surveillance       |                                                                      | 1993-1994, 1996-1997, 2000-2003, 2006-2007 | All Ages         | 2485239     |
| Philippines | Philippines Field Health Services Information System (FHSIS)                                                                                   | Surveillance       | Capitol Region                                                       | 1998                                       | All Ages         | 48333       |
| Philippines | World Health Survey (WHS)                                                                                                                      | Survey/Census      |                                                                      | 1997                                       | All Ages         | 51          |
| Philippines | Effect of not breastfeeding on the risk of diarrheal and respiratory mortality in children under 2 years of age in Metro Cebu, The Philippines | Verbal Autopsy     | Cebu [urban]                                                         | 1989                                       | birth - 364 days | 425         |
| Philippines | A comparison of vital registration and reproductive-age mortality survey in Bukidnon, Philippines, 2008                                        | Verbal Autopsy     | Bukidnon                                                             | 2008                                       | 15 - 49 years    | 402         |
| Philippines | Philippines Vital Statistics - Deaths 1979-2000                                                                                                | Vital Registration |                                                                      | 1980, 1982-1991                            | All Ages         | 3506013     |
| Philippines | WHO Mortality Database                                                                                                                         | Vital Registration |                                                                      | 1981, 1992-2003, 2008                      | All Ages         | 4967428     |
| Philippines | Philippines Vital Statistics - Deaths 2001-2005                                                                                                | Vital Registration |                                                                      | 2004-2005                                  | All Ages         | 829184      |
| Philippines | Philippines Vital Registration - Deaths 2006                                                                                                   | Vital Registration |                                                                      | 2006                                       | All Ages         | 440892      |
| Philippines | Philippines Vital Registration - Deaths 2007                                                                                                   | Vital Registration |                                                                      | 2007                                       | All Ages         | 441784      |
| Philippines | Philippines Vital Registration - Deaths 2009                                                                                                   | Vital Registration |                                                                      | 2009                                       | All Ages         | 480725      |
| Philippines | Philippines Vital Registration - Deaths 2010                                                                                                   | Vital Registration |                                                                      | 2010                                       | All Ages         | 488162      |
| Philippines | Philippines Vital Registration - Deaths 2011                                                                                                   | Vital Registration |                                                                      | 2011                                       | All Ages         | 498320      |
| Philippines | Philippines Vital Registration - Deaths 2012                                                                                                   | Vital Registration |                                                                      | 2012                                       | All Ages         | 514644      |
| Sri Lanka   | United Nations Surveys on Crime Trends and the Operations of Criminal Justice Systems 1970-2006                                                | Police Records     |                                                                      | 1980-1986, 1990                            | All Ages         | Death Rate  |
| Sri Lanka   | United Nations Office on Drugs and Crime Global Study on Homicide 2011                                                                         | Police Records     | Sri Lanka WHO-MDB                                                    | 1997-2003                                  | All Ages         | Death Rate  |
| Sri Lanka   | United Nations Office on Drugs and Crime Global Study on Homicide 2011                                                                         | Police Records     | Sri Lanka National police                                            | 2005-2007, 2009                            | All Ages         | Death Rate  |
| Sri Lanka   | Sri Lanka Achievements in Maternal Health Report                                                                                               | Surveillance       |                                                                      | 1995-2008                                  | 15 - 49 years    | MMR         |
| Sri Lanka   | World Health Survey (WHS)                                                                                                                      | Survey/Census      |                                                                      | 1997                                       | All Ages         | 151         |
| Sri Lanka   | WHO Mortality Database                                                                                                                         | Vital Registration |                                                                      | 1980-1989, 1991-1992, 1997-2003, 2006      | All Ages         | 2070480     |
| Sri Lanka   | Sri Lanka Vital Registration System                                                                                                            | Vital Registration |                                                                      | 1993-1996, 2004-2005, 2009-2010            | All Ages         | 928066      |
| Seychelles  | United Nations Surveys on Crime Trends and the Operations of Criminal Justice Systems 1970-2006                                                | Police Records     |                                                                      | 1980, 1988-1990                            | All Ages         | Death Rate  |
| Seychelles  | WHO Mortality Database                                                                                                                         | Vital Registration |                                                                      | 1981-1982, 1985-1987, 2001-2012            | All Ages         | 10187       |
| Thailand    | Global Status Report on Road Safety 2009                                                                                                       | Police Records     |                                                                      | 2007                                       | All Ages         | Death Rate  |
| Thailand    | United Nations Office on Drugs and Crime Global Study on Homicide 2011                                                                         | Police Records     | Thailand National police                                             | 2009-2010                                  | All Ages         | Death Rate  |
| Thailand    | Thailand Burden of Disease and Injuries 1998-1999                                                                                              | Verbal Autopsy     |                                                                      | 1997-1998                                  | All Ages         | 18991       |
| Thailand    | Risk factors for a five-year death in the interASIA-south cohort                                                                               | Verbal Autopsy     | Songkhla                                                             | 2000                                       | 35 - 64 years    | 50          |
| Thailand    | Perinatal death pattern in the four districts of Thailand: findings from the Prospective Cohort Study of Thai Children (PCTC)                  | Verbal Autopsy     | Panomtuan Kanchanaburi; Thepa Songkhla; Kranuan Khon Kaen; Muang Nan | 2001                                       | birth - 6 days   | 14          |

**Appendix Table 6: Causes of death data source list by geography, source type, and study site, with years, age range, and sample size, excluding sources on lower respiratory infection and diarrhoea etiologies**

| Location                       | Source name                                                                                                                 | Source type        | Site                                                               | Years                                      | Ages             | Sample size |
|--------------------------------|-----------------------------------------------------------------------------------------------------------------------------|--------------------|--------------------------------------------------------------------|--------------------------------------------|------------------|-------------|
| Thailand                       | Thailand Verbal Autopsy Study 2005                                                                                          | Verbal Autopsy     |                                                                    | 2005                                       | All Ages         | 12270       |
| Thailand                       | WHO Mortality Database                                                                                                      | Vital Registration |                                                                    | 1980-1987, 1990-1992, 1994-2000, 2002-2006 | All Ages         | 6933895     |
| Thailand                       | Hospital Mortality Data 2002-2007                                                                                           | Vital Registration |                                                                    | 2007                                       | All Ages         | 393163      |
| Thailand                       | Thailand Public Health Statistics                                                                                           | Vital Registration |                                                                    | 2009-2011                                  | All Ages         | 1207783     |
| Timor-Leste                    | United Nations Office on Drugs and Crime Global Study on Homicide 2011                                                      | Police Records     | Timor-Leste UN-PKO                                                 | 2004-2007, 2009-2010                       | All Ages         | Death Rate  |
| Timor-Leste                    | Demographic and Health Survey (DHS)                                                                                         | Sibling History    |                                                                    | 1995-2009                                  | 15 - 49 years    | 15          |
| Vietnam                        | United Nations Office on Drugs and Crime Global Study on Homicide 2011                                                      | Police Records     | Vietnam CTS                                                        | 2005-2006                                  | All Ages         | Death Rate  |
| Vietnam                        | Survey on immunization, diarrhoeal disease and mortality in Quang Ninh Province, Vietnam                                    | Survey/Census      | Quang Ninh province [urban]                                        | 1987                                       | birth - 364 days | 103         |
| Vietnam                        | Vietnam Population Change and Family Planning Survey                                                                        | Survey/Census      |                                                                    | 2006-2007                                  | All Ages         | CF          |
| Vietnam                        | Are there social inequities in child morbidity and mortality in rural Vietnam                                               | Verbal Autopsy     | 1/8 districts in Thai Binh province in the Red River Delta [rural] | 1987                                       | birth - 4 years  | 124         |
| Vietnam                        | Maternal mortality in Vietnam in 1994-95                                                                                    | Verbal Autopsy     | Quang Ngai [urban]                                                 | 1994                                       | 15 - 49 years    | 812         |
| Vietnam                        | Maternal mortality in Vietnam in 1994-95                                                                                    | Verbal Autopsy     | Song Be [rural]                                                    | 1994                                       | 15 - 49 years    | 794         |
| Vietnam                        | Maternal mortality in Vietnam in 1994-95                                                                                    | Verbal Autopsy     | Vinh Phu [rural]                                                   | 1994                                       | 15 - 49 years    | 1236        |
| Vietnam                        | Applying verbal autopsy to determine cause of death in rural Vietnam                                                        | Verbal Autopsy     | Bavi District (FilaBavi) [rural]                                   | 1999                                       | All Ages         | 189         |
| Vietnam                        | Socio-economic status inequality and major causes of death in adults: a 5-year follow-up study in rural Vietnam             | Verbal Autopsy     | Bavi District (FilaBavi) [rural]                                   | 2001                                       | 20 years +       | 1067        |
| Vietnam                        | Mortality patterns in Vietnam, 2006: Findings from a national verbal autopsy survey                                         | Verbal Autopsy     |                                                                    | 2006                                       | All Ages         | 6804        |
| Vietnam                        | Demographic Surveillance System (DSS)                                                                                       | Verbal Autopsy     |                                                                    | 2006-2008                                  | All Ages         | 853         |
| Vietnam                        | Mortality measures from sample-based surveillance: evidence of the epidemiological transition in Viet Nam, Unpublished data | Verbal Autopsy     |                                                                    | 2008                                       | All Ages         | 9291        |
| Vietnam                        | Vietnam Burden of Disease and Injury Study 2008                                                                             | Verbal Autopsy     |                                                                    | 2008                                       | All Ages         | 541133      |
| Vietnam                        | The causes of deaths in Chililab between 2008-2010 based on verbal autopsy method                                           | Verbal Autopsy     | seven villages Chililabarea [rural]                                | 2008-2010                                  | All Ages         | 896         |
| Vietnam                        | Mortality measures from sample-based surveillance: evidence of the epidemiological transition in Viet Nam                   | Verbal Autopsy     |                                                                    | 2009                                       | All Ages         | 9920        |
| Vietnam                        | Causes of neonatal death: results from NeoKIP community-based trial in Quang Ninh province, Vietnam                         | Verbal Autopsy     | Quang Ninh [rural]                                                 | 2009                                       | birth - 27 days  | 233         |
| Vietnam                        | Maternal and Antenatal Risk Factors for Stillbirths and Neonatal Mortality in Rural Bangladesh: A Case-Control Study        | Verbal Autopsy     | [urban]                                                            | 2011                                       | birth - 27 days  | 68          |
| American Samoa                 | United States National Vital Statistics System (NVSS)                                                                       | Vital Registration |                                                                    | 1997-2012                                  | All Ages         | 4176        |
| Federated States of Micronesia | Global Status Report on Road Safety 2009                                                                                    | Police Records     |                                                                    | 2007                                       | All Ages         | Death Rate  |
| Fiji                           | United Nations Surveys on Crime Trends and the Operations of Criminal Justice Systems 1970-2006                             | Police Records     |                                                                    | 1980-1986, 1990-1994                       | All Ages         | Death Rate  |
| Fiji                           | United Nations Office on Drugs and Crime Global Study on Homicide 2011                                                      | Police Records     | Fiji Interpol                                                      | 2003-2004                                  | All Ages         | Death Rate  |
| Fiji                           | Global Status Report on Road Safety 2009                                                                                    | Police Records     |                                                                    | 2007                                       | All Ages         | Death Rate  |
| Fiji                           | WHO Mortality Database                                                                                                      | Vital Registration |                                                                    | 1999, 2001-2009, 2011-2012                 | All Ages         | 71250       |
| Guam                           | United Nations Office on Drugs and Crime Global Study on Homicide 2011                                                      | Police Records     | Guam National police                                               | 2000-2007                                  | All Ages         | Death Rate  |
| Guam                           | United States National Vital Statistics System (NVSS)                                                                       | Vital Registration |                                                                    | 1994-2012                                  | All Ages         | 13652       |



**Appendix Table 6: Causes of death data source list by geography, source type, and study site, with years, age range, and sample size, excluding sources on lower respiratory infection and diarrhoea etiologies**

| Location                 | Source name                                                                                                                                      | Source type        | Site                             | Years                                                 | Ages          | Sample size |
|--------------------------|--------------------------------------------------------------------------------------------------------------------------------------------------|--------------------|----------------------------------|-------------------------------------------------------|---------------|-------------|
| Kiribati                 | United Nations Surveys on Crime Trends and the Operations of Criminal Justice Systems 1970-2006                                                  | Police Records     |                                  | 1986                                                  | All Ages      | Death Rate  |
| Kiribati                 | Global Status Report on Road Safety 2009                                                                                                         | Police Records     |                                  | 2007                                                  | All Ages      | Death Rate  |
| Kiribati                 | WHO Mortality Database                                                                                                                           | Vital Registration |                                  | 1991-2001                                             | All Ages      | 8332        |
| Marshall Islands         | United Nations Surveys on Crime Trends and the Operations of Criminal Justice Systems 1970-2006                                                  | Police Records     |                                  | 1991-1992, 1994                                       | All Ages      | Death Rate  |
| Marshall Islands         | Global Status Report on Road Safety 2009                                                                                                         | Police Records     |                                  | 2007                                                  | All Ages      | Death Rate  |
| Northern Mariana Islands | United States National Vital Statistics System (NVSS)                                                                                            | Vital Registration |                                  | 1998-2012                                             | All Ages      | 2251        |
| Papua New Guinea         | United Nations Office on Drugs and Crime Global Study on Homicide 2011                                                                           | Police Records     | Papua New Guinea National police | 2006-2007                                             | All Ages      | Death Rate  |
| Papua New Guinea         | Global Status Report on Road Safety 2009                                                                                                         | Police Records     |                                  | 2007                                                  | All Ages      | Death Rate  |
| Papua New Guinea         | Discrepancies between national maternal mortality data and international estimates: the experience of Papua New Guinea                           | Sibling history    |                                  | 1995, 2006                                            | 15 - 49 years | MMR         |
| Papua New Guinea         | Discrepancies between national maternal mortality data and international estimates: the experience of Papua New Guinea                           | Survey/Census      |                                  | 2009                                                  | 15 - 49 years | MMR         |
| Papua New Guinea         | Mortality and morbidity from acute lower respiratory tract infections in Tari, Southern Highlands Province 1977-1983                             | Verbal Autopsy     | (Tari Basin)                     | 1980                                                  | All Ages      | 2193        |
| Papua New Guinea         | Demography and causes of death among the Huli in the Tari Basin                                                                                  | Verbal Autopsy     | Tari Basin [rural]               | 1980                                                  | All Ages      | 2312        |
| Papua New Guinea         | Mortality in a rural area of Madang Province, Papua New Guinea                                                                                   | Verbal Autopsy     | Madang [rural]                   | 1983                                                  | All Ages      | 407         |
| Papua New Guinea         | Mortality rates and the utilization of health services during terminal illness in the Asaro Valley, Eastern Highlands Province, Papua New Guinea | Verbal Autopsy     | Asaro Valley                     | 1985                                                  | All Ages      | 582         |
| Papua New Guinea         | WHO Mortality Database                                                                                                                           | Vital Registration |                                  | 1980                                                  | All Ages      | 3559        |
| Solomon Islands          | United Nations Office on Drugs and Crime Global Study on Homicide 2011                                                                           | Police Records     | Solomon Islands CTS              | 2004-2007                                             | All Ages      | Death Rate  |
| Tonga                    | United Nations Surveys on Crime Trends and the Operations of Criminal Justice Systems 1970-2006                                                  | Police Records     |                                  | 1980, 1986-1990                                       | All Ages      | Death Rate  |
| Tonga                    | Tonga Vital Statistics - Deaths 2003                                                                                                             | Vital Registration |                                  | 2003                                                  | All Ages      | 1682        |
| Vanuatu                  | United Nations Surveys on Crime Trends and the Operations of Criminal Justice Systems 1970-2006                                                  | Police Records     |                                  | 1987-1990                                             | All Ages      | Death Rate  |
| Armenia                  | United Nations Surveys on Crime Trends and the Operations of Criminal Justice Systems 1970-2006                                                  | Police Records     |                                  | 1986-1988                                             | All Ages      | Death Rate  |
| Armenia                  | Global Status Report on Road Safety 2009                                                                                                         | Police Records     |                                  | 2007                                                  | All Ages      | Death Rate  |
| Armenia                  | WHO Mortality Database                                                                                                                           | Vital Registration |                                  | 1981-1982, 1985-2003, 2006, 2008-2012                 | All Ages      | 658840      |
| Azerbaijan               | United Nations Office on Drugs and Crime Global Study on Homicide 2011                                                                           | Police Records     | Azerbaijan CTS                   | 2007                                                  | All Ages      | Death Rate  |
| Azerbaijan               | WHO Mortality Database                                                                                                                           | Vital Registration |                                  | 1981-1982, 1985-2004, 2007                            | All Ages      | 1085713     |
| Georgia                  | United Nations Surveys on Crime Trends and the Operations of Criminal Justice Systems 1970-2006                                                  | Police Records     |                                  | 1990-1994                                             | All Ages      | Death Rate  |
| Georgia                  | United Nations Office on Drugs and Crime Global Study on Homicide 2011                                                                           | Police Records     | Georgia CTS/Transmonee           | 1995-2007, 2009-2010                                  | All Ages      | Death Rate  |
| Georgia                  | United Nations Office on Drugs and Crime Global Study on Homicide 2011                                                                           | Police Records     | Georgia WHO-HFA                  | 1996-2001                                             | All Ages      | Death Rate  |
| Georgia                  | WHO Mortality Database                                                                                                                           | Vital Registration |                                  | 1981-1982, 1985-1992, 1994-2001, 2004-2007, 2009-2014 | All Ages      | 1235263     |
| Kazakhstan               | United Nations Office on Drugs and Crime Global Study on Homicide 2011                                                                           | Police Records     | Kazakhstan Transmonee            | 1995-1999                                             | All Ages      | Death Rate  |



**Appendix Table 6: Causes of death data source list by geography, source type, and study site, with years, age range, and sample size, excluding sources on lower respiratory infection and diarrhoea etiologies**

| Location               | Source name                                                                                             | Source type        | Site                                                           | Years                           | Ages             | Sample size |
|------------------------|---------------------------------------------------------------------------------------------------------|--------------------|----------------------------------------------------------------|---------------------------------|------------------|-------------|
| Kazakhstan             | United Nations Office on Drugs and Crime Global Study on Homicide 2011                                  | Police Records     | Kazakhstan WHO-HFA                                             | 1995-1999                       | All Ages         | Death Rate  |
| Kazakhstan             | WHO Mortality Database                                                                                  | Vital Registration |                                                                | 1981-1982, 1985-2006, 2008-2012 | All Ages         | 4170695     |
| Kyrgyzstan             | United Nations Office on Drugs and Crime Global Study on Homicide 2011                                  | Police Records     | Kyrgyzstan CTS/Transmonee                                      | 1995, 1997, 2000-2007, 2009     | All Ages         | Death Rate  |
| Kyrgyzstan             | United Nations Office on Drugs and Crime Global Study on Homicide 2011                                  | Police Records     | Kyrgyzstan WHO-HFA                                             | 1995, 1997, 2000-2007, 2009     | All Ages         | Death Rate  |
| Kyrgyzstan             | WHO Mortality Database                                                                                  | Vital Registration |                                                                | 1981-1982, 1985-2013            | All Ages         | 1055953     |
| Mongolia               | United Nations Office on Drugs and Crime Global Study on Homicide 2011                                  | Police Records     | Mongolia CTS                                                   | 2004-2007, 2009                 | All Ages         | Death Rate  |
| Mongolia               | Tracking Maternal Mortality Declines in Mongolia Between 1992 and 2007: The Importance of Collaboration | Vital Registration |                                                                | 1992-1993, 1995-2007            | 15 - 49 years    | MMR         |
| Mongolia               | WHO Mortality Database                                                                                  | Vital Registration |                                                                | 1994                            | All Ages         | 14923       |
| Mongolia               | Mongolia Vital Statistics - Deaths 2004-2008                                                            | Vital Registration |                                                                | 2004-2008                       | All Ages         | 77294       |
| Mongolia               | Mongolia Vital Registration - Deaths 2010                                                               | Vital Registration |                                                                | 2010                            | All Ages         | 17230       |
| Tajikistan             | United Nations Office on Drugs and Crime Global Study on Homicide 2011                                  | Police Records     | Tajikistan WHO-HFA                                             | 2000-2001                       | All Ages         | Death Rate  |
| Tajikistan             | United Nations Office on Drugs and Crime Global Study on Homicide 2011                                  | Police Records     | Tajikistan CTS                                                 | 2006-2007, 2009                 | All Ages         | Death Rate  |
| Tajikistan             | Tajikistan - Infant Mortality in Tajikistan: Two Studies Look at Risk Factors                           | Verbal Autopsy     | Sugd province and the Region of Republican Subordination (RSS) | 2001                            | birth - 364 days | 96          |
| Tajikistan             | Tajikistan - Infant Mortality in Tajikistan: Two Studies Look at Risk Factors                           | Verbal Autopsy     | Khatlon province Dushanbe city                                 | 2003                            | birth - 364 days | 217         |
| Tajikistan             | WHO Mortality Database                                                                                  | Vital Registration |                                                                | 1981-1982, 1985-2005            | All Ages         | 731888      |
| Turkmenistan           | United Nations Office on Drugs and Crime Global Study on Homicide 2011                                  | Police Records     | Turkmenistan Transmonee                                        | 1995-1997, 1999-2006            | All Ages         | Death Rate  |
| Turkmenistan           | WHO Mortality Database                                                                                  | Vital Registration |                                                                | 1981-1982, 1985-1998, 2013      | All Ages         | 482159      |
| Uzbekistan             | United Nations Office on Drugs and Crime Global Study on Homicide 2011                                  | Police Records     | Uzbekistan WHO-HFA                                             | 1995-2005                       | All Ages         | Death Rate  |
| Uzbekistan             | United Nations Office on Drugs and Crime Global Study on Homicide 2011                                  | Police Records     | Uzbekistan CTS/Transmonee                                      | 1995-2007                       | All Ages         | Death Rate  |
| Uzbekistan             | WHO Mortality Database                                                                                  | Vital Registration |                                                                | 1981-1982, 1985-2005            | All Ages         | 3100622     |
| Albania                | Global Status Report on Road Safety 2009                                                                | Police Records     |                                                                | 2007                            | All Ages         | Death Rate  |
| Albania                | WHO Mortality Database                                                                                  | Vital Registration |                                                                | 1987-1989, 1992-2009            | All Ages         | 346602      |
| Albania                | Albania Vital Registration - Causes of Death 1993-2010                                                  | Vital Registration |                                                                | 2010                            | All Ages         | 380         |
| Bosnia and Herzegovina | World Health Survey (WHS)                                                                               | Survey/Census      |                                                                | 1997                            | All Ages         | 51          |
| Bosnia and Herzegovina | WHO Mortality Database                                                                                  | Vital Registration |                                                                | 1985-1991, 2011                 | All Ages         | 242187      |
| Bulgaria               | Global Status Report on Road Safety 2009                                                                | Police Records     |                                                                | 2007                            | All Ages         | Death Rate  |
| Bulgaria               | WHO Mortality Database                                                                                  | Vital Registration |                                                                | 1980-2012                       | All Ages         | 3610447     |
| Croatia                | Global Status Report on Road Safety 2009                                                                | Police Records     |                                                                | 2007                            | All Ages         | Death Rate  |
| Croatia                | WHO Mortality Database                                                                                  | Vital Registration |                                                                | 1985-2013                       | All Ages         | 1495702     |
| Czech Republic         | Global Status Report on Road Safety 2009                                                                | Police Records     |                                                                | 2007                            | All Ages         | Death Rate  |
| Czech Republic         | WHO Mortality Database                                                                                  | Vital Registration |                                                                | 1986-2013                       | All Ages         | 3188714     |
| Hungary                | Global Status Report on Road Safety 2009                                                                | Police Records     |                                                                | 2007                            | All Ages         | Death Rate  |
| Hungary                | WHO Mortality Database                                                                                  | Vital Registration |                                                                | 1980-2013                       | All Ages         | 4745330     |
| Macedonia              | WHO Mortality Database                                                                                  | Vital Registration |                                                                | 1991-2010                       | All Ages         | 346691      |
| Montenegro             | Global Status Report on Road Safety 2009                                                                | Police Records     |                                                                | 2007                            | All Ages         | Death Rate  |

**Appendix Table 6: Causes of death data source list by geography, source type, and study site, with years, age range, and sample size, excluding sources on lower respiratory infection and diarrhoea etiologies**

| Location         | Source name                                                              | Source type        | Site           | Years                                            | Ages     | Sample size |
|------------------|--------------------------------------------------------------------------|--------------------|----------------|--------------------------------------------------|----------|-------------|
| Montenegro       | WHO Mortality Database                                                   | Vital Registration |                | 2000-2004, 2006, 2009                            | All Ages | 57121       |
| Poland           | Global Status Report on Road Safety 2009                                 | Police Records     |                | 2007                                             | All Ages | Death Rate  |
| Poland           | WHO Mortality Database                                                   | Vital Registration |                | 1980-1996, 1999-2013                             | All Ages | 11957283    |
| Romania          | WHO Mortality Database                                                   | Vital Registration |                | 1980-2012                                        | All Ages | 8415641     |
| Serbia           | Global Status Report on Road Safety 2009                                 | Police Records     |                | 2007                                             | All Ages | Death Rate  |
| Serbia           | WHO Mortality Database                                                   | Vital Registration |                | 1998-2013                                        | All Ages | 1642937     |
| Slovakia         | Global Status Report on Road Safety 2009                                 | Police Records     |                | 2007                                             | All Ages | Death Rate  |
| Slovakia         | WHO Mortality Database                                                   | Vital Registration |                | 1992-2010, 2012-2014                             | All Ages | 1155411     |
| Slovenia         | Global Status Report on Road Safety 2009                                 | Police Records     |                | 2007                                             | All Ages | Death Rate  |
| Slovenia         | WHO Mortality Database                                                   | Vital Registration |                | 1985-2010                                        | All Ages | 493028      |
| Belarus          | WHO Mortality Database                                                   | Vital Registration |                | 1981-1982, 1985-1995, 1997-2003, 2007-2009, 2011 | All Ages | 2947092     |
| Estonia          | World Health Survey (WHS)                                                | Survey/Census      |                | 1997                                             | All Ages | 6           |
| Estonia          | WHO Mortality Database                                                   | Vital Registration |                | 1981-1982, 1985-2012                             | All Ages | 549124      |
| Latvia           | WHO Mortality Database                                                   | Vital Registration |                | 1980-2012                                        | All Ages | 983159      |
| Lithuania        | Global Status Report on Road Safety 2009                                 | Police Records     |                | 2006                                             | All Ages | Death Rate  |
| Lithuania        | WHO Mortality Database                                                   | Vital Registration |                | 1981-1982, 1985-2013                             | All Ages | 1269969     |
| Moldova          | WHO Mortality Database                                                   | Vital Registration |                | 1981-1982, 1985-2013                             | All Ages | 1331728     |
| Russia           | Russia Road Safety Performance 2010                                      | Police Records     |                | 2004-2008                                        | All Ages | Death Rate  |
| Russia           | WHO Mortality Database                                                   | Vital Registration |                | 1980-1988                                        | All Ages | 13992472    |
| Russia           | Russia Mortality Rates by Region, Age, Sex, and Cause of Death 1989-1998 | Vital Registration |                | 1989-1998                                        | All Ages | 19274200    |
| Russia           | Russia Mortality Rates by Region, Age, Sex, and Cause of Death 1999-2005 | Vital Registration |                | 1999-2000                                        | All Ages | 4357944     |
| Russia           | Russia Vital Registration System                                         | Vital Registration |                | 2001-2014                                        | All Ages | 29485688    |
| Ukraine          | WHO Mortality Database                                                   | Vital Registration |                | 1981-1982, 1985-2012                             | All Ages | 20960298    |
| Brunei           | United Nations Office on Drugs and Crime Global Study on Homicide 2011   | Police Records     | Brunei WHO-MDB | 1996-1998                                        | All Ages | Death Rate  |
| Brunei           | United Nations Office on Drugs and Crime Global Study on Homicide 2011   | Police Records     | Brunei CTS     | 2003-2004, 2006                                  | All Ages | Death Rate  |
| Brunei           | Global Status Report on Road Safety 2009                                 | Police Records     |                | 2007                                             | All Ages | Death Rate  |
| Brunei           | WHO Mortality Database                                                   | Vital Registration |                | 1996-2013                                        | All Ages | 19294       |
| Japan: Aichi     | Japan Vital Registration System                                          | Vital Registration |                | 1980-2013                                        | All Ages | 1514522     |
| Japan: Akita     | Japan Vital Registration System                                          | Vital Registration |                | 1980-2013                                        | All Ages | 393161      |
| Japan: Aomori    | Japan Vital Registration System                                          | Vital Registration |                | 1980-2013                                        | All Ages | 436414      |
| Japan: Chiba     | Japan Vital Registration System                                          | Vital Registration |                | 1980-2013                                        | All Ages | 1222403     |
| Japan: Ehime     | Japan Vital Registration System                                          | Vital Registration |                | 1980-2013                                        | All Ages | 465619      |
| Japan: Fukui     | Japan Vital Registration System                                          | Vital Registration |                | 1980-2013                                        | All Ages | 235887      |
| Japan: Fukuoka   | Japan Vital Registration System                                          | Vital Registration |                | 1980-2013                                        | All Ages | 1285379     |
| Japan: Fukushima | Japan Vital Registration System                                          | Vital Registration |                | 1980-2013                                        | All Ages | 622295      |
| Japan: Gifu      | Japan Vital Registration System                                          | Vital Registration |                | 1980-2013                                        | All Ages | 550630      |
| Japan: Gunma     | Japan Vital Registration System                                          | Vital Registration |                | 1980-2013                                        | All Ages | 538270      |
| Japan: Hiroshima | Japan Vital Registration System                                          | Vital Registration |                | 1980-2013                                        | All Ages | 776972      |
| Japan: Hokkaidō  | Japan Vital Registration System                                          | Vital Registration |                | 1980-2013                                        | All Ages | 1454522     |

**Appendix Table 6: Causes of death data source list by geography, source type, and study site, with years, age range, and sample size, excluding sources on lower respiratory infection and diarrhoea etiologies**

| Location         | Source name                                                            | Source type        | Site                        | Years     | Ages     | Sample size |
|------------------|------------------------------------------------------------------------|--------------------|-----------------------------|-----------|----------|-------------|
| Japan: Hyōgo     | Japan Vital Registration System                                        | Vital Registration |                             | 1980-2013 | All Ages | 1423264     |
| Japan: Ibaraki   | Japan Vital Registration System                                        | Vital Registration |                             | 1980-2013 | All Ages | 755182      |
| Japan: Ishikawa  | Japan Vital Registration System                                        | Vital Registration |                             | 1980-2013 | All Ages | 317957      |
| Japan: Iwate     | Japan Vital Registration System                                        | Vital Registration |                             | 1980-2013 | All Ages | 431161      |
| Japan: Kagawa    | Japan Vital Registration System                                        | Vital Registration |                             | 1980-2013 | All Ages | 309212      |
| Japan: Kagoshima | Japan Vital Registration System                                        | Vital Registration |                             | 1980-2013 | All Ages | 587598      |
| Japan: Kanagawa  | Japan Vital Registration System                                        | Vital Registration |                             | 1980-2013 | All Ages | 1653904     |
| Japan: Kōchi     | Japan Vital Registration System                                        | Vital Registration |                             | 1980-2013 | All Ages | 282426      |
| Japan: Kumamoto  | Japan Vital Registration System                                        | Vital Registration |                             | 1980-2013 | All Ages | 545404      |
| Japan: Kyōto     | Japan Vital Registration System                                        | Vital Registration |                             | 1980-2013 | All Ages | 684103      |
| Japan: Mie       | Japan Vital Registration System                                        | Vital Registration |                             | 1980-2013 | All Ages | 513813      |
| Japan: Miyagi    | Japan Vital Registration System                                        | Vital Registration |                             | 1980-2013 | All Ages | 576512      |
| Japan: Miyazaki  | Japan Vital Registration System                                        | Vital Registration |                             | 1980-2013 | All Ages | 339283      |
| Japan: Nagano    | Japan Vital Registration System                                        | Vital Registration |                             | 1980-2013 | All Ages | 643193      |
| Japan: Nagasaki  | Japan Vital Registration System                                        | Vital Registration |                             | 1980-2013 | All Ages | 462617      |
| Japan: Nara      | Japan Vital Registration System                                        | Vital Registration |                             | 1980-2013 | All Ages | 347724      |
| Japan: Niigata   | Japan Vital Registration System                                        | Vital Registration |                             | 1980-2013 | All Ages | 732819      |
| Japan: Ōita      | Japan Vital Registration System                                        | Vital Registration |                             | 1980-2013 | All Ages | 377766      |
| Japan: Okayama   | Japan Vital Registration System                                        | Vital Registration |                             | 1980-2013 | All Ages | 568267      |
| Japan: Okinawa   | Japan Vital Registration System                                        | Vital Registration |                             | 1980-2013 | All Ages | 259591      |
| Japan: Ōsaka     | Japan Vital Registration System                                        | Vital Registration |                             | 1980-2013 | All Ages | 2071326     |
| Japan: Saga      | Japan Vital Registration System                                        | Vital Registration |                             | 1980-2013 | All Ages | 266168      |
| Japan: Saitama   | Japan Vital Registration System                                        | Vital Registration |                             | 1980-2013 | All Ages | 1323196     |
| Japan: Shiga     | Japan Vital Registration System                                        | Vital Registration |                             | 1980-2013 | All Ages | 311351      |
| Japan: Shimane   | Japan Vital Registration System                                        | Vital Registration |                             | 1980-2013 | All Ages | 263473      |
| Japan: Shizuoka  | Japan Vital Registration System                                        | Vital Registration |                             | 1980-2013 | All Ages | 936226      |
| Japan: Tochigi   | Japan Vital Registration System                                        | Vital Registration |                             | 1980-2013 | All Ages | 524080      |
| Japan: Tokushima | Japan Vital Registration System                                        | Vital Registration |                             | 1980-2013 | All Ages | 265449      |
| Japan: Tōkyō     | Japan Vital Registration System                                        | Vital Registration |                             | 1980-2013 | All Ages | 2754255     |
| Japan: Tottori   | Japan Vital Registration System                                        | Vital Registration |                             | 1980-2013 | All Ages | 190114      |
| Japan: Toyama    | Japan Vital Registration System                                        | Vital Registration |                             | 1980-2013 | All Ages | 329982      |
| Japan: Wakayama  | Japan Vital Registration System                                        | Vital Registration |                             | 1980-2013 | All Ages | 345954      |
| Japan: Yamagata  | Japan Vital Registration System                                        | Vital Registration |                             | 1980-2013 | All Ages | 397344      |
| Japan: Yamaguchi | Japan Vital Registration System                                        | Vital Registration |                             | 1980-2013 | All Ages | 499828      |
| Japan: Yamanashi | Japan Vital Registration System                                        | Vital Registration |                             | 1980-2013 | All Ages | 240729      |
| South Korea      | United Nations Office on Drugs and Crime Global Study on Homicide 2011 | Police Records     | South Korea WHO-MDB         | 1995-1997 | All Ages | Death Rate  |
| South Korea      | United Nations Office on Drugs and Crime Global Study on Homicide 2011 | Police Records     | South Korea National police | 2009      | All Ages | Death Rate  |
| South Korea      | WHO Mortality Database                                                 | Vital Registration |                             | 1985-2013 | All Ages | 6703551     |
| Singapore        | Global Status Report on Road Safety 2009                               | Police Records     |                             | 2007      | All Ages | Death Rate  |
| Singapore        | WHO Mortality Database                                                 | Vital Registration |                             | 1980-2014 | All Ages | 511814      |

**Appendix Table 6: Causes of death data source list by geography, source type, and study site, with years, age range, and sample size, excluding sources on lower respiratory infection and diarrhoea etiologies**

| Location                        | Source name                                                                                          | Source type        | Site | Years                | Ages          | Sample size |
|---------------------------------|------------------------------------------------------------------------------------------------------|--------------------|------|----------------------|---------------|-------------|
| Australia                       | Australia Maternal Deaths                                                                            | Surveillance       |      | 1997-1999            | 15 - 44 years | 90          |
| Australia                       | Australia Maternal Deaths                                                                            | Surveillance       |      | 2006-2011            | 15 - 54 years | 201         |
| Australia                       | WHO Mortality Database                                                                               | Vital Registration |      | 1980-2004, 2006-2011 | All Ages      | 3895616     |
| Australia                       | Australia Vital Registration - Deaths 2005                                                           | Vital Registration |      | 2005                 | All Ages      | 131323      |
| New Zealand                     | New Zealand Annual Report of the Perinatal and Maternal Mortality Review Committee 2012              | Surveillance       |      | 2006-2012            | 20 - 54 years | MMR         |
| New Zealand                     | WHO Mortality Database                                                                               | Vital Registration |      | 1980-1987            | All Ages      | 210732      |
| New Zealand                     | New Zealand Mortality Collection                                                                     | Vital Registration |      | 1988-2012            | All Ages      | 697936      |
| Austria                         | WHO Mortality Database                                                                               | Vital Registration |      | 1980-2014            | All Ages      | 2843518     |
| Belgium                         | WHO Mortality Database                                                                               | Vital Registration |      | 1980-2012            | All Ages      | 3504510     |
| Cyprus                          | Global Status Report on Road Safety 2009                                                             | Police Records     |      | 2007                 | All Ages      | Death Rate  |
| Cyprus                          | WHO Mortality Database                                                                               | Vital Registration |      | 1999-2000, 2004-2012 | All Ages      | 57807       |
| Denmark                         | Maternal mortality in Denmark, 1985-1994                                                             | Surveillance       |      | 1985-1994            | 10 - 54 years | MMR         |
| Denmark                         | Maternal deaths in Denmark 2002-2006                                                                 | Surveillance       |      | 2002-2006            | 10 - 54 years | MMR         |
| Denmark                         | WHO Mortality Database                                                                               | Vital Registration |      | 1980-2012            | All Ages      | 1894591     |
| Finland                         | Pregnancy-associated deaths in Finland 1987-1994--definition problems and benefits of record linkage | Surveillance       |      | 1987-1994            | 15 - 49 years | MMR         |
| Finland                         | WHO Mortality Database                                                                               | Vital Registration |      | 1980-2013            | All Ages      | 1652210     |
| France                          | [Maternal mortality in France, 2007-2009]                                                            | Surveillance       |      | 2001-2009            | 10 - 54 years | MMR         |
| France                          | WHO Mortality Database                                                                               | Vital Registration |      | 1980-2011            | All Ages      | 17092446    |
| Germany                         | WHO Mortality Database                                                                               | Vital Registration |      | 1980-2013            | All Ages      | 29929755    |
| Greece                          | WHO Mortality Database                                                                               | Vital Registration |      | 1980-2012            | All Ages      | 3289100     |
| Iceland                         | WHO Mortality Database                                                                               | Vital Registration |      | 1980-2009            | All Ages      | 53285       |
| Ireland                         | Ireland Confidential Maternal Death Enquiry Report 2009-2012                                         | Surveillance       |      | 2009-2012            | 10 - 54 years | MMR         |
| Ireland                         | WHO Mortality Database                                                                               | Vital Registration |      | 1980-2012            | All Ages      | 1016803     |
| Israel                          | Global Status Report on Road Safety 2009                                                             | Police Records     |      | 2007                 | All Ages      | Death Rate  |
| Israel                          | WHO Mortality Database                                                                               | Vital Registration |      | 1980-2013            | All Ages      | 1167904     |
| Italy                           | WHO Mortality Database                                                                               | Vital Registration |      | 1980-2003, 2006-2012 | All Ages      | 17357051    |
| Luxembourg                      | WHO Mortality Database                                                                               | Vital Registration |      | 1980-2013            | All Ages      | 129291      |
| Malta                           | Global Status Report on Road Safety 2009                                                             | Police Records     |      | 2007                 | All Ages      | Death Rate  |
| Malta                           | WHO Mortality Database                                                                               | Vital Registration |      | 1980-2014            | All Ages      | 105362      |
| Netherlands                     | WHO Mortality Database                                                                               | Vital Registration |      | 1980-2013            | All Ages      | 4484563     |
| Norway                          | Maternal Deaths in Norway 2005-2009                                                                  | Surveillance       |      | 2005-2009            | 10 - 54 years | MMR         |
| Norway                          | WHO Mortality Database                                                                               | Vital Registration |      | 1980-2013            | All Ages      | 1472045     |
| Portugal                        | WHO Mortality Database                                                                               | Vital Registration |      | 1980-2003, 2007-2013 | All Ages      | 3170914     |
| Portugal                        | Portugal Vital Statistics - Deaths 2005-2006                                                         | Vital Registration |      | 2005-2006            | All Ages      | 195324      |
| Spain                           | WHO Mortality Database                                                                               | Vital Registration |      | 1980-2013            | All Ages      | 11832353    |
| Sweden: Stockholm               | Sweden Cause of Death Register                                                                       | Vital Registration |      | 1980-2011            | All Ages      | 435595      |
| Sweden: Sweden except Stockholm | Sweden Cause of Death Register                                                                       | Vital Registration |      | 1980-2011            | All Ages      | 2161827     |
| Switzerland                     | Global Status Report on Road Safety 2009                                                             | Police Records     |      | 2006                 | All Ages      | Death Rate  |
| Switzerland                     | WHO Mortality Database                                                                               | Vital Registration |      | 1980-2013            | All Ages      | 2094173     |

**Appendix Table 6: Causes of death data source list by geography, source type, and study site, with years, age range, and sample size, excluding sources on lower respiratory infection and diarrhoea etiologies**

| Location                                          | Source name                                                                                     | Source type        | Site                                       | Years                           | Ages          | Sample size |
|---------------------------------------------------|-------------------------------------------------------------------------------------------------|--------------------|--------------------------------------------|---------------------------------|---------------|-------------|
| United Kingdom: England: East Midlands            | United Kingdom - England and Wales Vital Registration System                                    | Vital Registration |                                            | 1981-2013                       | All Ages      | 1416488     |
| United Kingdom: England: East of England          | United Kingdom - England and Wales Vital Registration System                                    | Vital Registration |                                            | 1981-2013                       | All Ages      | 1736957     |
| United Kingdom: England: Greater London           | United Kingdom - England and Wales Vital Registration System                                    | Vital Registration |                                            | 1981-2013                       | All Ages      | 2058518     |
| United Kingdom: England: North East England       | United Kingdom - England and Wales Vital Registration System                                    | Vital Registration |                                            | 1981-2013                       | All Ages      | 975240      |
| United Kingdom: England: North West England       | United Kingdom - England and Wales Vital Registration System                                    | Vital Registration |                                            | 1981-2013                       | All Ages      | 2566893     |
| United Kingdom: England: South East England       | United Kingdom - England and Wales Vital Registration System                                    | Vital Registration |                                            | 1981-2013                       | All Ages      | 2652034     |
| United Kingdom: England: South West England       | United Kingdom - England and Wales Vital Registration System                                    | Vital Registration |                                            | 1981-2013                       | All Ages      | 1803292     |
| United Kingdom: England: West Midlands            | United Kingdom - England and Wales Vital Registration System                                    | Vital Registration |                                            | 1981-2013                       | All Ages      | 1812346     |
| United Kingdom: England: Yorkshire and the Humber | United Kingdom - England and Wales Vital Registration System                                    | Vital Registration |                                            | 1981-2013                       | All Ages      | 1794013     |
| Northern Ireland                                  | WHO Mortality Database                                                                          | Vital Registration |                                            | 1980-2013                       | All Ages      | 516306      |
| Scotland                                          | WHO Mortality Database                                                                          | Vital Registration |                                            | 1980-2013                       | All Ages      | 2022934     |
| Wales                                             | United Kingdom - England and Wales Vital Registration System                                    | Vital Registration |                                            | 1981-2013                       | All Ages      | 1107500     |
| Argentina                                         | United Nations Surveys on Crime Trends and the Operations of Criminal Justice Systems 1970-2006 | Police Records     |                                            | 1980                            | All Ages      | Death Rate  |
| Argentina                                         | United Nations Office on Drugs and Crime Global Study on Homicide 2011                          | Police Records     | Argentina CTS/Ministry of Justice          | 1997-1999, 2001-2005, 2007      | All Ages      | Death Rate  |
| Argentina                                         | United Nations Office on Drugs and Crime Global Study on Homicide 2011                          | Police Records     | Argentina PAHO                             | 1997-1999, 2001-2005, 2007      | All Ages      | Death Rate  |
| Argentina                                         | Maternal Mortality in Argentina: A Closer Look at Women Who Die Outside of the Health System    | Verbal Autopsy     | Chaco Formosa Mendoza San Luis and Tucuman | 2002                            | 10 - 49 years | 252         |
| Argentina                                         | WHO Mortality Database                                                                          | Vital Registration |                                            | 1980-2013                       | All Ages      | 9337228     |
| Chile                                             | United Nations Office on Drugs and Crime Global Study on Homicide 2011                          | Police Records     | Chile PAHO                                 | 2000-2004, 2007                 | All Ages      | Death Rate  |
| Chile                                             | United Nations Office on Drugs and Crime Global Study on Homicide 2011                          | Police Records     | Chile CTS                                  | 2007, 2009                      | All Ages      | Death Rate  |
| Chile                                             | WHO Mortality Database                                                                          | Vital Registration |                                            | 1980-1984, 1986-2013            | All Ages      | 2675596     |
| Chile                                             | Chile Vital Registration - Deaths 1985                                                          | Vital Registration |                                            | 1985                            | All Ages      | 73490       |
| Uruguay                                           | United Nations Surveys on Crime Trends and the Operations of Criminal Justice Systems 1970-2006 | Police Records     |                                            | 1980-1986                       | All Ages      | Death Rate  |
| Uruguay                                           | United Nations Office on Drugs and Crime Global Study on Homicide 2011                          | Police Records     | Uruguay PAHO                               | 1995-2001, 2003-2004            | All Ages      | Death Rate  |
| Uruguay                                           | United Nations Office on Drugs and Crime Global Study on Homicide 2011                          | Police Records     | Uruguay Ministry of Interior/SES           | 2000-2007, 2009-2010            | All Ages      | Death Rate  |
| Uruguay                                           | WHO Mortality Database                                                                          | Vital Registration |                                            | 1980-1990, 1993-2010, 2012-2013 | All Ages      | 954956      |
| Uruguay                                           | Uruguay Vital Registration - Deaths 1991                                                        | Vital Registration |                                            | 1991                            | All Ages      | 29784       |
| Canada                                            | United Nations Office on Drugs and Crime Global Study on Homicide 2011                          | Police Records     | Canada PAHO                                | 1995-2004                       | All Ages      | Death Rate  |
| Canada                                            | United Nations Office on Drugs and Crime Global Study on Homicide 2011                          | Police Records     | Canada NSO                                 | 1995-2007, 2009                 | All Ages      | Death Rate  |
| Canada                                            | Global Status Report on Road Safety 2009                                                        | Police Records     |                                            | 2006                            | All Ages      | Death Rate  |
| Canada                                            | Under-reporting of maternal mortality in Canada: a question of definition                       | Surveillance       |                                            | 1988-1992                       | 10 - 49 years | MMR         |

**Appendix Table 6: Causes of death data source list by geography, source type, and study site, with years, age range, and sample size, excluding sources on lower respiratory infection and diarrhoea etiologies**

| Location                            | Source name                                                                                 | Source type        | Site | Years     | Ages          | Sample size |
|-------------------------------------|---------------------------------------------------------------------------------------------|--------------------|------|-----------|---------------|-------------|
| Canada                              | Temporal trends in maternal mortality in Canada II: estimates based on hospitalization data | Surveillance       |      | 1996-2007 | 15 - 44 years | MMR         |
| Canada                              | WHO Mortality Database                                                                      | Vital Registration |      | 1980-2011 | All Ages      | 6637878     |
| Greenland                           | Greenland Vital Registration System                                                         | Vital Registration |      | 1995-2013 | All Ages      | 8472        |
| United States: Alabama              | United States National Vital Statistics System (NVSS)                                       | Vital Registration |      | 1980-2013 | All Ages      | 1449614     |
| United States: Alaska               | United States National Vital Statistics System (NVSS)                                       | Vital Registration |      | 1980-2013 | All Ages      | 91653       |
| United States: Arizona              | United States National Vital Statistics System (NVSS)                                       | Vital Registration |      | 1980-2013 | All Ages      | 1224260     |
| United States: Arkansas             | United States National Vital Statistics System (NVSS)                                       | Vital Registration |      | 1980-2013 | All Ages      | 901469      |
| United States: California           | United States National Vital Statistics System (NVSS)                                       | Vital Registration |      | 1980-2013 | All Ages      | 7521454     |
| United States: Colorado             | United States National Vital Statistics System (NVSS)                                       | Vital Registration |      | 1980-2013 | All Ages      | 872357      |
| United States: Connecticut          | United States National Vital Statistics System (NVSS)                                       | Vital Registration |      | 1980-2013 | All Ages      | 978102      |
| United States: Delaware             | United States National Vital Statistics System (NVSS)                                       | Vital Registration |      | 1980-2013 | All Ages      | 219935      |
| United States: District of Columbia | United States National Vital Statistics System (NVSS)                                       | Vital Registration |      | 1980-2013 | All Ages      | 212433      |
| United States: Florida              | United States National Vital Statistics System (NVSS)                                       | Vital Registration |      | 1980-2013 | All Ages      | 5067902     |
| United States: Georgia              | United States National Vital Statistics System (NVSS)                                       | Vital Registration |      | 1980-2013 | All Ages      | 2006006     |
| United States: Hawaii               | United States National Vital Statistics System (NVSS)                                       | Vital Registration |      | 1980-2013 | All Ages      | 263117      |
| United States: Idaho                | United States National Vital Statistics System (NVSS)                                       | Vital Registration |      | 1980-2013 | All Ages      | 308606      |
| United States: Illinois             | United States National Vital Statistics System (NVSS)                                       | Vital Registration |      | 1980-2013 | All Ages      | 3523943     |
| United States: Indiana              | United States National Vital Statistics System (NVSS)                                       | Vital Registration |      | 1980-2013 | All Ages      | 1793847     |
| United States: Iowa                 | United States National Vital Statistics System (NVSS)                                       | Vital Registration |      | 1980-2013 | All Ages      | 940059      |
| United States: Kansas               | United States National Vital Statistics System (NVSS)                                       | Vital Registration |      | 1980-2013 | All Ages      | 801258      |
| United States: Kentucky             | United States National Vital Statistics System (NVSS)                                       | Vital Registration |      | 1980-2013 | All Ages      | 1286270     |
| United States: Louisiana            | United States National Vital Statistics System (NVSS)                                       | Vital Registration |      | 1980-2013 | All Ages      | 1340546     |
| United States: Maine                | United States National Vital Statistics System (NVSS)                                       | Vital Registration |      | 1980-2013 | All Ages      | 404267      |
| United States: Maryland             | United States National Vital Statistics System (NVSS)                                       | Vital Registration |      | 1980-2013 | All Ages      | 1385010     |
| United States: Massachusetts        | United States National Vital Statistics System (NVSS)                                       | Vital Registration |      | 1980-2013 | All Ages      | 1856538     |
| United States: Michigan             | United States National Vital Statistics System (NVSS)                                       | Vital Registration |      | 1980-2013 | All Ages      | 2831389     |
| United States: Minnesota            | United States National Vital Statistics System (NVSS)                                       | Vital Registration |      | 1980-2013 | All Ages      | 1242918     |
| United States: Mississippi          | United States National Vital Statistics System (NVSS)                                       | Vital Registration |      | 1980-2013 | All Ages      | 912672      |
| United States: Missouri             | United States National Vital Statistics System (NVSS)                                       | Vital Registration |      | 1980-2013 | All Ages      | 1805703     |
| United States: Montana              | United States National Vital Statistics System (NVSS)                                       | Vital Registration |      | 1980-2013 | All Ages      | 263181      |
| United States: Nebraska             | United States National Vital Statistics System (NVSS)                                       | Vital Registration |      | 1980-2013 | All Ages      | 511604      |
| United States: Nevada               | United States National Vital Statistics System (NVSS)                                       | Vital Registration |      | 1980-2013 | All Ages      | 453887      |
| United States: New Hampshire        | United States National Vital Statistics System (NVSS)                                       | Vital Registration |      | 1980-2013 | All Ages      | 314806      |
| United States: New Jersey           | United States National Vital Statistics System (NVSS)                                       | Vital Registration |      | 1980-2013 | All Ages      | 2425071     |
| United States: New Mexico           | United States National Vital Statistics System (NVSS)                                       | Vital Registration |      | 1980-2013 | All Ages      | 432559      |
| United States: New York             | United States National Vital Statistics System (NVSS)                                       | Vital Registration |      | 1980-2013 | All Ages      | 5490758     |
| United States: North Carolina       | United States National Vital Statistics System (NVSS)                                       | Vital Registration |      | 1980-2013 | All Ages      | 2226286     |
| United States: North Dakota         | United States National Vital Statistics System (NVSS)                                       | Vital Registration |      | 1980-2013 | All Ages      | 196355      |
| United States: Ohio                 | United States National Vital Statistics System (NVSS)                                       | Vital Registration |      | 1980-2013 | All Ages      | 3541782     |
| United States: Oklahoma             | United States National Vital Statistics System (NVSS)                                       | Vital Registration |      | 1980-2013 | All Ages      | 1122998     |
| United States: Oregon               | United States National Vital Statistics System (NVSS)                                       | Vital Registration |      | 1980-2013 | All Ages      | 948643      |

**Appendix Table 6: Causes of death data source list by geography, source type, and study site, with years, age range, and sample size, excluding sources on lower respiratory infection and diarrhoea etiologies**

| Location                      | Source name                                                                                     | Source type        | Site                                    | Years                                      | Ages     | Sample size |
|-------------------------------|-------------------------------------------------------------------------------------------------|--------------------|-----------------------------------------|--------------------------------------------|----------|-------------|
| United States: Pennsylvania   | United States National Vital Statistics System (NVSS)                                           | Vital Registration |                                         | 1980-2013                                  | All Ages | 4283631     |
| United States: Rhode Island   | United States National Vital Statistics System (NVSS)                                           | Vital Registration |                                         | 1980-2013                                  | All Ages | 327496      |
| United States: South Carolina | United States National Vital Statistics System (NVSS)                                           | Vital Registration |                                         | 1980-2013                                  | All Ages | 1153477     |
| United States: South Dakota   | United States National Vital Statistics System (NVSS)                                           | Vital Registration |                                         | 1980-2013                                  | All Ages | 231976      |
| United States: Tennessee      | United States National Vital Statistics System (NVSS)                                           | Vital Registration |                                         | 1980-2013                                  | All Ages | 1744645     |
| United States: Texas          | United States National Vital Statistics System (NVSS)                                           | Vital Registration |                                         | 1980-2013                                  | All Ages | 4785663     |
| United States: Utah           | United States National Vital Statistics System (NVSS)                                           | Vital Registration |                                         | 1980-2013                                  | All Ages | 391623      |
| United States: Vermont        | United States National Vital Statistics System (NVSS)                                           | Vital Registration |                                         | 1980-2013                                  | All Ages | 167459      |
| United States: Virginia       | United States National Vital Statistics System (NVSS)                                           | Vital Registration |                                         | 1980-2013                                  | All Ages | 1788452     |
| United States: Washington     | United States National Vital Statistics System (NVSS)                                           | Vital Registration |                                         | 1980-2013                                  | All Ages | 1403201     |
| United States: West Virginia  | United States National Vital Statistics System (NVSS)                                           | Vital Registration |                                         | 1980-2013                                  | All Ages | 694917      |
| United States: Wisconsin      | United States National Vital Statistics System (NVSS)                                           | Vital Registration |                                         | 1980-2013                                  | All Ages | 1517296     |
| United States: Wyoming        | United States National Vital Statistics System (NVSS)                                           | Vital Registration |                                         | 1980-2013                                  | All Ages | 126812      |
| Antigua and Barbuda           | United Nations Surveys on Crime Trends and the Operations of Criminal Justice Systems 1970-2006 | Police Records     |                                         | 1985-1986                                  | All Ages | Death Rate  |
| Antigua and Barbuda           | United Nations Office on Drugs and Crime Global Study on Homicide 2011                          | Police Records     | Antigua and Barbuda PAHO                | 1995, 2001-2002, 2004                      | All Ages | Death Rate  |
| Antigua and Barbuda           | United Nations Office on Drugs and Crime Global Study on Homicide 2011                          | Police Records     | Antigua and Barbuda OAS/National police | 2001-2002, 2004, 2007, 2009-2010           | All Ages | Death Rate  |
| Antigua and Barbuda           | WHO Mortality Database                                                                          | Vital Registration |                                         | 1983, 1985-1995, 2000-2009, 2012-2013      | All Ages | 10421       |
| Antigua and Barbuda           | Antigua and Barbuda Vital Statistics - Deaths 1996-1999                                         | Vital Registration |                                         | 1996-1999                                  | All Ages | 1841        |
| The Bahamas                   | United Nations Surveys on Crime Trends and the Operations of Criminal Justice Systems 1970-2006 | Police Records     |                                         | 1981-1986, 1990-1994                       | All Ages | Death Rate  |
| The Bahamas                   | United Nations Office on Drugs and Crime Global Study on Homicide 2011                          | Police Records     | The Bahamas PAHO                        | 1995-2004                                  | All Ages | Death Rate  |
| The Bahamas                   | United Nations Office on Drugs and Crime Global Study on Homicide 2011                          | Police Records     | The Bahamas OAS                         | 2000-2004, 2006-2007, 2009-2010            | All Ages | Death Rate  |
| The Bahamas                   | WHO Mortality Database                                                                          | Vital Registration |                                         | 1980-1981, 1984-1985, 1987, 1993-2012      | All Ages | 41292       |
| Barbados                      | United Nations Surveys on Crime Trends and the Operations of Criminal Justice Systems 1970-2006 | Police Records     |                                         | 1986                                       | All Ages | Death Rate  |
| Barbados                      | United Nations Office on Drugs and Crime Global Study on Homicide 2011                          | Police Records     | Barbados CTS/OAS                        | 1998-1999, 2009-2010                       | All Ages | Death Rate  |
| Barbados                      | Global Status Report on Road Safety 2009                                                        | Police Records     |                                         | 2007                                       | All Ages | Death Rate  |
| Barbados                      | WHO Mortality Database                                                                          | Vital Registration |                                         | 1980-1995, 2000-2012                       | All Ages | 65172       |
| Belize                        | United Nations Surveys on Crime Trends and the Operations of Criminal Justice Systems 1970-2006 | Police Records     |                                         | 1980                                       | All Ages | Death Rate  |
| Belize                        | United Nations Office on Drugs and Crime Global Study on Homicide 2011                          | Police Records     | Belize PAHO                             | 1998-2004, 2006-2007                       | All Ages | Death Rate  |
| Belize                        | United Nations Office on Drugs and Crime Global Study on Homicide 2011                          | Police Records     | Belize CTS/OAS                          | 2000-2004, 2006-2007, 2009-2010            | All Ages | Death Rate  |
| Belize                        | WHO Mortality Database                                                                          | Vital Registration |                                         | 1980-1984, 1986-1987, 1989-1991, 1993-2013 | All Ages | 34348       |
| Bermuda                       | United Nations Surveys on Crime Trends and the Operations of Criminal Justice Systems 1970-2006 | Police Records     |                                         | 1981, 1988, 1991, 1994                     | All Ages | Death Rate  |
| Bermuda                       | United Nations Office on Drugs and Crime Global Study on Homicide 2011                          | Police Records     | Bermuda National police                 | 1998, 2002, 2010                           | All Ages | Death Rate  |
| Bermuda                       | WHO Mortality Database                                                                          | Vital Registration |                                         | 1980, 1983-2013                            | All Ages | 13435       |



**Appendix Table 6: Causes of death data source list by geography, source type, and study site, with years, age range, and sample size, excluding sources on lower respiratory infection and diarrhoea etiologies**

| Location           | Source name                                                                                                | Source type        | Site                                                   | Years                            | Ages             | Sample size |
|--------------------|------------------------------------------------------------------------------------------------------------|--------------------|--------------------------------------------------------|----------------------------------|------------------|-------------|
| Cuba               | United Nations Office on Drugs and Crime Global Study on Homicide 2011                                     | Police Records     | Cuba PAHO                                              | 1995-2007                        | All Ages         | Death Rate  |
| Cuba               | WHO Mortality Database                                                                                     | Vital Registration |                                                        | 1980-2013                        | All Ages         | 2554520     |
| Dominica           | United Nations Surveys on Crime Trends and the Operations of Criminal Justice Systems 1970-2006            | Police Records     |                                                        | 1982-1983, 1985-1986             | All Ages         | Death Rate  |
| Dominica           | United Nations Office on Drugs and Crime Global Study on Homicide 2011                                     | Police Records     | Dominica PAHO                                          | 1999-2000, 2002-2004             | All Ages         | Death Rate  |
| Dominica           | United Nations Office on Drugs and Crime Global Study on Homicide 2011                                     | Police Records     | Dominica OAS                                           | 2000, 2002-2004, 2007, 2009-2010 | All Ages         | Death Rate  |
| Dominica           | WHO Mortality Database                                                                                     | Vital Registration |                                                        | 1980-2013                        | All Ages         | 17591       |
| Dominican Republic | United Nations Office on Drugs and Crime Global Study on Homicide 2011                                     | Police Records     | Dominican Republic PAHO                                | 1996-2000, 2002                  | All Ages         | Death Rate  |
| Dominican Republic | United Nations Office on Drugs and Crime Global Study on Homicide 2011                                     | Police Records     | Dominican Republic NGO (b)/SES                         | 1996-2000, 2002, 2007, 2009-2010 | All Ages         | Death Rate  |
| Dominican Republic | Estimating Maternal Mortality in Monseñor Nouel Province, Dominican Republic                               | Sibling History    | Monsenor Nouel Province                                | 1986                             | 15 - 49 years    | MMR         |
| Dominican Republic | Dominican Republic Demographic and Health Survey - Maternal Mortality Data                                 | Sibling History    |                                                        | 1988-2007                        | 15 - 54 years    | 247         |
| Dominican Republic | Dominican Republic Maternal Health Surveillance System Data 1999-2009                                      | Surveillance       | nationwide                                             | 1999-2008                        | 15 - 49 years    | MMR         |
| Dominican Republic | World Health Survey (WHS)                                                                                  | Survey/Census      |                                                        | 1997                             | All Ages         | 51          |
| Dominican Republic | WHO Mortality Database                                                                                     | Vital Registration |                                                        | 1980-1992, 1994-2001, 2003-2012  | All Ages         | 805975      |
| Grenada            | United Nations Office on Drugs and Crime Global Study on Homicide 2011                                     | Police Records     | Grenada OAS                                            | 2000, 2002-2003, 2010            | All Ages         | Death Rate  |
| Grenada            | United Nations Office on Drugs and Crime Global Study on Homicide 2011                                     | Police Records     | Grenada PAHO                                           | 2002                             | All Ages         | Death Rate  |
| Grenada            | WHO Mortality Database                                                                                     | Vital Registration |                                                        | 1984-1985, 1988-1996, 2001-2013  | All Ages         | 18506       |
| Guyana             | United Nations Surveys on Crime Trends and the Operations of Criminal Justice Systems 1970-2006            | Police Records     |                                                        | 1991-1993                        | All Ages         | Death Rate  |
| Guyana             | United Nations Office on Drugs and Crime Global Study on Homicide 2011                                     | Police Records     | Guyana PAHO                                            | 2002-2003                        | All Ages         | Death Rate  |
| Guyana             | United Nations Office on Drugs and Crime Global Study on Homicide 2011                                     | Police Records     | Guyana OAS/NSO                                         | 2002-2003, 2009-2010             | All Ages         | Death Rate  |
| Guyana             | WHO Mortality Database                                                                                     | Vital Registration |                                                        | 1984, 1988-1999, 2001-2011       | All Ages         | 116271      |
| Guyana             | Guyana Vital Registration - Deaths 2000 ICD10 - PAHO                                                       | Vital Registration |                                                        | 2000                             | All Ages         | 4808        |
| Haiti              | United Nations Office on Drugs and Crime Global Study on Homicide 2011                                     | Police Records     | Haiti PAHO                                             | 2001                             | All Ages         | Death Rate  |
| Haiti              | United Nations Office on Drugs and Crime Global Study on Homicide 2011                                     | Police Records     | Haiti UN-PKO                                           | 2007, 2009-2010                  | All Ages         | Death Rate  |
| Haiti              | Haiti Demographic and Health Survey - Maternal Mortality Data                                              | Sibling History    |                                                        | 1986-2005                        | 15 - 49 years    | 455         |
| Haiti              | The utility of verbal autopsies for identifying HIV-1-related deaths in Haitian children                   | Verbal Autopsy     | Cite Soleil [rural]                                    | 1989                             | birth - 364 days | 244         |
| Haiti              | Survey on Infant mortality in Mirebalais, Haiti                                                            | Verbal Autopsy     | Mirebalais [urban]                                     | 1994                             | birth - 364 days | 148         |
| Haiti              | Assessing the causes of under-five mortality in the Albert Schweitzer Hospital service area of rural Haiti | Verbal Autopsy     | service area of the Albert Schweitzer Hospital [rural] | 1997                             | birth - 4 years  | 97          |
| Haiti              | WHO Mortality Database                                                                                     | Vital Registration |                                                        | 1981, 1999, 2002-2004            | All Ages         | 81870       |
| Jamaica            | United Nations Surveys on Crime Trends and the Operations of Criminal Justice Systems 1970-2006            | Police Records     |                                                        | 1981-1986, 1990-1994             | All Ages         | Death Rate  |
| Jamaica            | United Nations Office on Drugs and Crime Global Study on Homicide 2011                                     | Police Records     | Jamaica CTS/National police                            | 1995-2007, 2009-2010             | All Ages         | Death Rate  |



**Appendix Table 6: Causes of death data source list by geography, source type, and study site, with years, age range, and sample size, excluding sources on lower respiratory infection and diarrhoea etiologies**

| Location                         | Source name                                                                                     | Source type        | Site                                         | Years                                      | Ages           | Sample size |
|----------------------------------|-------------------------------------------------------------------------------------------------|--------------------|----------------------------------------------|--------------------------------------------|----------------|-------------|
| Jamaica                          | Jamaica Maternal Mortality Surveillance System 1998-2008                                        | Surveillance       |                                              | 1998-2003, 2005, 2008                      | 15 - 49 years  | 8196        |
| Jamaica                          | Neonatal mortality determinants in Jamaica                                                      | Verbal Autopsy     | Jamaica                                      | 1987                                       | birth - 6 days | 792         |
| Jamaica                          | WHO Mortality Database                                                                          | Vital Registration |                                              | 1980-1991, 2000-2006, 2009-2011            | All Ages       | 303890      |
| Puerto Rico                      | United Nations Office on Drugs and Crime Global Study on Homicide 2011                          | Police Records     | Puerto Rico PAHO                             | 1995-2007                                  | All Ages       | Death Rate  |
| Puerto Rico                      | United Nations Office on Drugs and Crime Global Study on Homicide 2011                          | Police Records     | Puerto Rico National police                  | 1995-2007, 2009-2010                       | All Ages       | Death Rate  |
| Puerto Rico                      | Global Status Report on Road Safety 2009                                                        | Police Records     |                                              | 2007                                       | All Ages       | Death Rate  |
| Puerto Rico                      | WHO Mortality Database                                                                          | Vital Registration |                                              | 1980-1993                                  | All Ages       | 336021      |
| Puerto Rico                      | United States National Vital Statistics System (NVSS)                                           | Vital Registration |                                              | 1994-2012                                  | All Ages       | 554833      |
| Saint Lucia                      | United Nations Office on Drugs and Crime Global Study on Homicide 2011                          | Police Records     | Saint Lucia PAHO                             | 1995-1997, 1999-2004                       | All Ages       | Death Rate  |
| Saint Lucia                      | United Nations Office on Drugs and Crime Global Study on Homicide 2011                          | Police Records     | Saint Lucia OAS                              | 2000-2004, 2006-2007, 2009-2010            | All Ages       | Death Rate  |
| Saint Lucia                      | WHO Mortality Database                                                                          | Vital Registration |                                              | 1980-1981, 1983, 1986-2006, 2008-2012      | All Ages       | 27708       |
| Saint Vincent and the Grenadines | United Nations Surveys on Crime Trends and the Operations of Criminal Justice Systems 1970-2006 | Police Records     |                                              | 1981-1985                                  | All Ages       | Death Rate  |
| Saint Vincent and the Grenadines | United Nations Office on Drugs and Crime Global Study on Homicide 2011                          | Police Records     | Saint Vincent and the Grenadines PAHO        | 1995-1996, 1998-2004, 2007                 | All Ages       | Death Rate  |
| Saint Vincent and the Grenadines | United Nations Office on Drugs and Crime Global Study on Homicide 2011                          | Police Records     | Saint Vincent and the Grenadines OAS/NGO (c) | 1995-1996, 1998-2004, 2007, 2009-2010      | All Ages       | Death Rate  |
| Saint Vincent and the Grenadines | WHO Mortality Database                                                                          | Vital Registration |                                              | 1982-1987, 1990, 1995-2013                 | All Ages       | 19827       |
| Suriname                         | United Nations Surveys on Crime Trends and the Operations of Criminal Justice Systems 1970-2006 | Police Records     |                                              | 1984-1986                                  | All Ages       | Death Rate  |
| Suriname                         | United Nations Office on Drugs and Crime Global Study on Homicide 2011                          | Police Records     | Suriname PAHO                                | 2001                                       | All Ages       | Death Rate  |
| Suriname                         | United Nations Office on Drugs and Crime Global Study on Homicide 2011                          | Police Records     | Suriname OAS                                 | 2001, 2006-2007                            | All Ages       | Death Rate  |
| Suriname                         | WHO Mortality Database                                                                          | Vital Registration |                                              | 1980-1982, 1984-1992, 1995-2006, 2008-2012 | All Ages       | 69493       |
| Suriname                         | Suriname Vital Statistics - Deaths 2007                                                         | Vital Registration |                                              | 2007                                       | All Ages       | 2008        |
| Trinidad and Tobago              | United Nations Surveys on Crime Trends and the Operations of Criminal Justice Systems 1970-2006 | Police Records     |                                              | 1981-1986                                  | All Ages       | Death Rate  |
| Trinidad and Tobago              | United Nations Office on Drugs and Crime Global Study on Homicide 2011                          | Police Records     | Trinidad and Tobago PAHO                     | 1995-1997, 2000-2002, 2004-2006            | All Ages       | Death Rate  |
| Trinidad and Tobago              | United Nations Office on Drugs and Crime Global Study on Homicide 2011                          | Police Records     | Trinidad and Tobago OAS/National police      | 2000-2007, 2009-2010                       | All Ages       | Death Rate  |
| Trinidad and Tobago              | WHO Mortality Database                                                                          | Vital Registration |                                              | 1980-2009                                  | All Ages       | 266335      |
| Virgin Islands, U.S.             | United Nations Office on Drugs and Crime Global Study on Homicide 2011                          | Police Records     | Virgin Islands: U.S. PAHO                    | 1997-2007                                  | All Ages       | Death Rate  |
| Virgin Islands, U.S.             | WHO Mortality Database                                                                          | Vital Registration |                                              | 1980                                       | All Ages       | 540         |
| Virgin Islands, U.S.             | United States National Vital Statistics System (NVSS)                                           | Vital Registration |                                              | 1994-2012                                  | All Ages       | 13200       |
| Bolivia                          | United Nations Office on Drugs and Crime Global Study on Homicide 2011                          | Police Records     | Bolivia National police                      | 2005-2007, 2009-2010                       | All Ages       | Death Rate  |
| Bolivia                          | Global Status Report on Road Safety 2009                                                        | Police Records     |                                              | 2007                                       | All Ages       | Death Rate  |
| Bolivia                          | Bolivia Demographic and Health Survey - Maternal Mortality Data                                 | Sibling History    |                                              | 1980-2008                                  | 15 - 34 years  | 35          |
| Bolivia                          | Bolivia Census 2001                                                                             | Survey/Census      |                                              | 2000-2001                                  | 15 - 49 years  | 22782       |
| Bolivia                          | WHO Mortality Database                                                                          | Vital Registration |                                              | 2000-2003                                  | All Ages       | 88639       |

**Appendix Table 6: Causes of death data source list by geography, source type, and study site, with years, age range, and sample size, excluding sources on lower respiratory infection and diarrhoea etiologies**

| Location    | Source name                                                                                     | Source type        | Site                               | Years                                      | Ages          | Sample size |
|-------------|-------------------------------------------------------------------------------------------------|--------------------|------------------------------------|--------------------------------------------|---------------|-------------|
| Ecuador     | United Nations Surveys on Crime Trends and the Operations of Criminal Justice Systems 1970-2006 | Police Records     |                                    | 1991                                       | All Ages      | Death Rate  |
| Ecuador     | United Nations Office on Drugs and Crime Global Study on Homicide 2011                          | Police Records     | Ecuador PAHO                       | 1996, 1999, 2006-2007                      | All Ages      | Death Rate  |
| Ecuador     | United Nations Office on Drugs and Crime Global Study on Homicide 2011                          | Police Records     | Ecuador National police            | 2009                                       | All Ages      | Death Rate  |
| Ecuador     | Ecuador Reproductive Health Survey - Maternal Mortality Data                                    | Sibling history    |                                    | 1980-2003                                  | 15 - 49 years | CF          |
| Ecuador     | WHO Mortality Database                                                                          | Vital Registration |                                    | 1980-2013                                  | All Ages      | 1874738     |
| Peru        | United Nations Surveys on Crime Trends and the Operations of Criminal Justice Systems 1970-2006 | Police Records     |                                    | 1981-1982, 1984-1985                       | All Ages      | Death Rate  |
| Peru        | United Nations Office on Drugs and Crime Global Study on Homicide 2011                          | Police Records     | Peru PAHO                          | 1999-2007                                  | All Ages      | Death Rate  |
| Peru        | United Nations Office on Drugs and Crime Global Study on Homicide 2011                          | Police Records     | Peru National police/SES           | 1999-2007, 2009                            | All Ages      | Death Rate  |
| Peru        | Global Status Report on Road Safety 2009                                                        | Police Records     |                                    | 2007                                       | All Ages      | Death Rate  |
| Peru        | Peru Demographic and Health Survey - Maternal Mortality Data                                    | Sibling History    |                                    | 1980-2012                                  | 15 - 49 years | 26          |
| Peru        | Peru Maternal Mortality 2002-2011                                                               | Surveillance       |                                    | 2002-2011                                  | 10 - 54 years | MMR         |
| Peru        | WHO Mortality Database                                                                          | Vital Registration |                                    | 1980-1983, 1986-1992, 1994-2000, 2007-2013 | All Ages      | 2234898     |
| Peru        | Peru Vital Statistics - Deaths 2001-2006                                                        | Vital Registration |                                    | 2001-2006                                  | All Ages      | 511527      |
| Colombia    | United Nations Surveys on Crime Trends and the Operations of Criminal Justice Systems 1970-2006 | Police Records     |                                    | 1990-1991                                  | All Ages      | Death Rate  |
| Colombia    | United Nations Office on Drugs and Crime Global Study on Homicide 2011                          | Police Records     | Colombia PAHO                      | 1995-2007                                  | All Ages      | Death Rate  |
| Colombia    | United Nations Office on Drugs and Crime Global Study on Homicide 2011                          | Police Records     | Colombia National police           | 1995-2007, 2009-2010                       | All Ages      | Death Rate  |
| Colombia    | Colombia Vital Statistics - Deaths 2008                                                         | Vital Registration |                                    | 1980-1996, 2008                            | All Ages      | 2791049     |
| Colombia    | WHO Mortality Database                                                                          | Vital Registration |                                    | 1997-2002, 2004-2006, 2009-2012            | All Ages      | 2462450     |
| Colombia    | Colombia Vital Registration 1980-2005                                                           | Vital Registration |                                    | 2003                                       | All Ages      | 192120      |
| Costa Rica  | United Nations Surveys on Crime Trends and the Operations of Criminal Justice Systems 1970-2006 | Police Records     |                                    | 1980, 1983-1985                            | All Ages      | Death Rate  |
| Costa Rica  | United Nations Office on Drugs and Crime Global Study on Homicide 2011                          | Police Records     | Costa Rica PAHO                    | 1997-2007                                  | All Ages      | Death Rate  |
| Costa Rica  | United Nations Office on Drugs and Crime Global Study on Homicide 2011                          | Police Records     | Costa Rica CTS/Ministry of Justice | 1997-2007, 2009-2010                       | All Ages      | Death Rate  |
| Costa Rica  | WHO Mortality Database                                                                          | Vital Registration |                                    | 1980-2013                                  | All Ages      | 468707      |
| El Salvador | United Nations Office on Drugs and Crime Global Study on Homicide 2011                          | Police Records     | El Salvador PAHO                   | 1995-2007                                  | All Ages      | Death Rate  |
| El Salvador | United Nations Office on Drugs and Crime Global Study on Homicide 2011                          | Police Records     | El Salvador National police        | 1995-2007, 2009-2010                       | All Ages      | Death Rate  |
| El Salvador | El Salvador Reproductive Health Survey - Maternal Mortality Data                                | Sibling history    |                                    | 1980-2002                                  | 15 - 49 years | CF          |
| El Salvador | El Salvador Maternal Mortality Data 2006-2010                                                   | Surveillance       | nationwide                         | 2006-2010                                  | 15 - 49 years | MMR         |
| El Salvador | International Integrated Public Use Microdata Series (IPUMS)                                    | Survey/Census      |                                    | 2007                                       | 1 year +      | 3150        |
| El Salvador | WHO Mortality Database                                                                          | Vital Registration |                                    | 1981-1984, 1990-1993, 1995-2012            | All Ages      | 790067      |
| Guatemala   | United Nations Surveys on Crime Trends and the Operations of Criminal Justice Systems 1970-2006 | Police Records     |                                    | 1993-1994                                  | All Ages      | Death Rate  |
| Guatemala   | United Nations Office on Drugs and Crime Global Study on Homicide 2011                          | Police Records     | Guatemala PAHO                     | 2001-2004, 2007                            | All Ages      | Death Rate  |

**Appendix Table 6: Causes of death data source list by geography, source type, and study site, with years, age range, and sample size, excluding sources on lower respiratory infection and diarrhoea etiologies**

| Location                | Source name                                                                                     | Source type        | Site                           | Years                           | Ages          | Sample size |
|-------------------------|-------------------------------------------------------------------------------------------------|--------------------|--------------------------------|---------------------------------|---------------|-------------|
| Guatemala               | United Nations Office on Drugs and Crime Global Study on Homicide 2011                          | Police Records     | Guatemala CTS/National police  | 2001-2004, 2007, 2009-2010      | All Ages      | Death Rate  |
| Guatemala               | Guatemala Demographic and Health Survey - Maternal Mortality Data                               | Sibling History    |                                | 1981-1995                       | 15 - 49 years | 122         |
| Guatemala               | Guatemala Baseline Maternal Mortality for the Year 2000                                         | Surveillance       |                                | 2000                            | 10 - 49 years | MMR         |
| Guatemala               | World Health Survey (WHS)                                                                       | Survey/Census      |                                | 1997                            | All Ages      | 15          |
| Guatemala               | WHO Mortality Database                                                                          | Vital Registration |                                | 1980-1981, 1984, 1986-2013      | All Ages      | 2139664     |
| Honduras                | United Nations Surveys on Crime Trends and the Operations of Criminal Justice Systems 1970-2006 | Police Records     |                                | 1980-1986                       | All Ages      | Death Rate  |
| Honduras                | United Nations Office on Drugs and Crime Global Study on Homicide 2011                          | Police Records     | Honduras OCAVI/National police | 1999-2007, 2009-2010            | All Ages      | Death Rate  |
| Honduras                | Reproductive Health Survey (RHS)                                                                | Sibling history    |                                | 1981-1995                       | 15 - 49 years | 0           |
| Honduras                | Honduras Maternal Mortality Ratio Update 2010                                                   | Surveillance       |                                | 1990, 1997, 2010                | 15 - 49 years | MMR         |
| Honduras                | Honduras Population and Housing Census 2001                                                     | Survey/Census      |                                | 2000-2001                       | 15 - 49 years | 4082        |
| Honduras                | Mortality of Women of Reproductive Age and Maternal Mortality                                   | Verbal Autopsy     |                                | 1990                            | 15 - 49 years | MMR         |
| Honduras                | Honduras Maternal Mortality Ratio Update 2010                                                   | Verbal Autopsy     |                                | 1990, 1997, 2010                | 15 - 49 years | MMR         |
| Honduras                | WHO Mortality Database                                                                          | Vital Registration |                                | 1980-1983, 1987-1990, 2008-2013 | All Ages      | 169544      |
| Mexico: Aguascalientes  | Mexico Intentional Search and Reclassification of Maternal Deaths 2005                          | Surveillance       |                                | 2005                            | 15 - 39 years | MMR         |
| Mexico: Aguascalientes  | Mexico Intentional Search and Reclassification of Maternal Deaths 2006                          | Surveillance       |                                | 2006                            | 20 - 44 years | MMR         |
| Mexico: Aguascalientes  | Mexico Intentional Search and Reclassification of Maternal Deaths 2008                          | Surveillance       |                                | 2008                            | 15 - 49 years | MMR         |
| Mexico: Aguascalientes  | Mexico Intentional Search and Reclassification of Maternal Deaths 2009                          | Surveillance       |                                | 2009                            | 15 - 49 years | MMR         |
| Mexico: Aguascalientes  | Mexico Intentional Search and Reclassification of Maternal Deaths 2010                          | Surveillance       |                                | 2010                            | 15 - 39 years | MMR         |
| Mexico: Aguascalientes  | Mexico Intentional Search and Reclassification of Maternal Deaths 2011                          | Surveillance       |                                | 2011                            | 15 - 34 years | MMR         |
| Mexico: Aguascalientes  | Mexico Intentional Search and Reclassification of Maternal Deaths 2012                          | Surveillance       |                                | 2012                            | 15 - 39 years | MMR         |
| Mexico: Aguascalientes  | Mexico Intentional Search and Reclassification of Maternal Deaths 2013                          | Surveillance       |                                | 2013                            | 15 - 44 years | MMR         |
| Mexico: Aguascalientes  | Mexico Vital Registration System - Mortality                                                    | Vital Registration |                                | 1980-2008, 2010-2014            | All Ages      | 127661      |
| Mexico: Aguascalientes  | Mexico Vital Statistics - Deaths 2009                                                           | Vital Registration |                                | 2009                            | All Ages      | 4709        |
| Mexico: Baja California | Mexico Intentional Search and Reclassification of Maternal Deaths 2005                          | Surveillance       |                                | 2005                            | 15 - 39 years | MMR         |
| Mexico: Baja California | Mexico Intentional Search and Reclassification of Maternal Deaths 2006                          | Surveillance       |                                | 2006                            | 10 - 44 years | MMR         |
| Mexico: Baja California | Mexico Intentional Search and Reclassification of Maternal Deaths 2008                          | Surveillance       |                                | 2008                            | 10 - 44 years | MMR         |
| Mexico: Baja California | Mexico Intentional Search and Reclassification of Maternal Deaths 2009                          | Surveillance       |                                | 2009                            | 10 - 44 years | MMR         |
| Mexico: Baja California | Mexico Intentional Search and Reclassification of Maternal Deaths 2010                          | Surveillance       |                                | 2010                            | 15 - 44 years | MMR         |
| Mexico: Baja California | Mexico Intentional Search and Reclassification of Maternal Deaths 2011                          | Surveillance       |                                | 2011                            | 15 - 39 years | MMR         |
| Mexico: Baja California | Mexico Intentional Search and Reclassification of Maternal Deaths 2012                          | Surveillance       |                                | 2012                            | 15 - 39 years | MMR         |
| Mexico: Baja California | Mexico Intentional Search and Reclassification of Maternal Deaths 2013                          | Surveillance       |                                | 2013                            | 15 - 39 years | MMR         |

**Appendix Table 6: Causes of death data source list by geography, source type, and study site, with years, age range, and sample size, excluding sources on lower respiratory infection and diarrhoea etiologies**

| Location                    | Source name                                                            | Source type        | Site | Years                | Ages          | Sample size |
|-----------------------------|------------------------------------------------------------------------|--------------------|------|----------------------|---------------|-------------|
| Mexico: Baja California     | Mexico Vital Registration System - Mortality                           | Vital Registration |      | 1980-2008, 2010-2014 | All Ages      | 339821      |
| Mexico: Baja California     | Mexico Vital Statistics - Deaths 2009                                  | Vital Registration |      | 2009                 | All Ages      | 14203       |
| Mexico: Baja California Sur | Mexico Intentional Search and Reclassification of Maternal Deaths 2005 | Surveillance       |      | 2005                 | 20 - 39 years | MMR         |
| Mexico: Baja California Sur | Mexico Intentional Search and Reclassification of Maternal Deaths 2006 | Surveillance       |      | 2006                 | 10 - 39 years | MMR         |
| Mexico: Baja California Sur | Mexico Intentional Search and Reclassification of Maternal Deaths 2008 | Surveillance       |      | 2008                 | 15 - 39 years | MMR         |
| Mexico: Baja California Sur | Mexico Intentional Search and Reclassification of Maternal Deaths 2009 | Surveillance       |      | 2009                 | 15 - 39 years | MMR         |
| Mexico: Baja California Sur | Mexico Intentional Search and Reclassification of Maternal Deaths 2010 | Surveillance       |      | 2010                 | 25 - 39 years | MMR         |
| Mexico: Baja California Sur | Mexico Intentional Search and Reclassification of Maternal Deaths 2011 | Surveillance       |      | 2011                 | 15 - 29 years | MMR         |
| Mexico: Baja California Sur | Mexico Intentional Search and Reclassification of Maternal Deaths 2012 | Surveillance       |      | 2012                 | 25 - 29 years | MMR         |
| Mexico: Baja California Sur | Mexico Intentional Search and Reclassification of Maternal Deaths 2013 | Surveillance       |      | 2013                 | 15 - 34 years | MMR         |
| Mexico: Baja California Sur | Mexico Vital Registration System - Mortality                           | Vital Registration |      | 1980-2008, 2010-2014 | All Ages      | 54731       |
| Mexico: Baja California Sur | Mexico Vital Statistics - Deaths 2009                                  | Vital Registration |      | 2009                 | All Ages      | 2338        |
| Mexico: Campeche            | Mexico Intentional Search and Reclassification of Maternal Deaths 2005 | Surveillance       |      | 2005                 | 15 - 39 years | MMR         |
| Mexico: Campeche            | Mexico Intentional Search and Reclassification of Maternal Deaths 2006 | Surveillance       |      | 2006                 | 10 - 44 years | MMR         |
| Mexico: Campeche            | Mexico Intentional Search and Reclassification of Maternal Deaths 2008 | Surveillance       |      | 2008                 | 15 - 39 years | MMR         |
| Mexico: Campeche            | Mexico Intentional Search and Reclassification of Maternal Deaths 2009 | Surveillance       |      | 2009                 | 15 - 39 years | MMR         |
| Mexico: Campeche            | Mexico Intentional Search and Reclassification of Maternal Deaths 2010 | Surveillance       |      | 2010                 | 10 - 34 years | MMR         |
| Mexico: Campeche            | Mexico Intentional Search and Reclassification of Maternal Deaths 2011 | Surveillance       |      | 2011                 | 20 - 44 years | MMR         |
| Mexico: Campeche            | Mexico Intentional Search and Reclassification of Maternal Deaths 2012 | Surveillance       |      | 2012                 | 15 - 39 years | MMR         |
| Mexico: Campeche            | Mexico Intentional Search and Reclassification of Maternal Deaths 2013 | Surveillance       |      | 2013                 | 15 - 44 years | MMR         |
| Mexico: Campeche            | Mexico Vital Registration System - Mortality                           | Vital Registration |      | 1980-2008, 2010-2014 | All Ages      | 88811       |
| Mexico: Campeche            | Mexico Vital Statistics - Deaths 2009                                  | Vital Registration |      | 2009                 | All Ages      | 3396        |
| Mexico: Chiapas             | Mexico Intentional Search and Reclassification of Maternal Deaths 2005 | Surveillance       |      | 2005                 | 15 - 49 years | MMR         |
| Mexico: Chiapas             | Mexico Intentional Search and Reclassification of Maternal Deaths 2006 | Surveillance       |      | 2006                 | 10 - 49 years | MMR         |
| Mexico: Chiapas             | Mexico Intentional Search and Reclassification of Maternal Deaths 2008 | Surveillance       |      | 2008                 | 10 - 49 years | MMR         |
| Mexico: Chiapas             | Mexico Intentional Search and Reclassification of Maternal Deaths 2009 | Surveillance       |      | 2009                 | 10 - 49 years | MMR         |
| Mexico: Chiapas             | Mexico Intentional Search and Reclassification of Maternal Deaths 2010 | Surveillance       |      | 2010                 | 15 - 49 years | MMR         |
| Mexico: Chiapas             | Mexico Intentional Search and Reclassification of Maternal Deaths 2011 | Surveillance       |      | 2011                 | 15 - 44 years | MMR         |
| Mexico: Chiapas             | Mexico Intentional Search and Reclassification of Maternal Deaths 2012 | Surveillance       |      | 2012                 | 10 - 49 years | MMR         |

**Appendix Table 6: Causes of death data source list by geography, source type, and study site, with years, age range, and sample size, excluding sources on lower respiratory infection and diarrhoea etiologies**

| Location          | Source name                                                            | Source type        | Site | Years                | Ages          | Sample size |
|-------------------|------------------------------------------------------------------------|--------------------|------|----------------------|---------------|-------------|
| Mexico: Chiapas   | Mexico Intentional Search and Reclassification of Maternal Deaths 2013 | Surveillance       |      | 2013                 | 15 - 44 years | MMR         |
| Mexico: Chiapas   | Mexico Vital Registration System - Mortality                           | Vital Registration |      | 1980-2008, 2010-2014 | All Ages      | 530775      |
| Mexico: Chiapas   | Mexico Vital Statistics - Deaths 2009                                  | Vital Registration |      | 2009                 | All Ages      | 19107       |
| Mexico: Chihuahua | Mexico Intentional Search and Reclassification of Maternal Deaths 2005 | Surveillance       |      | 2005                 | 10 - 49 years | MMR         |
| Mexico: Chihuahua | Mexico Intentional Search and Reclassification of Maternal Deaths 2006 | Surveillance       |      | 2006                 | 10 - 44 years | MMR         |
| Mexico: Chihuahua | Mexico Intentional Search and Reclassification of Maternal Deaths 2008 | Surveillance       |      | 2008                 | 15 - 44 years | MMR         |
| Mexico: Chihuahua | Mexico Intentional Search and Reclassification of Maternal Deaths 2009 | Surveillance       |      | 2009                 | 15 - 44 years | MMR         |
| Mexico: Chihuahua | Mexico Intentional Search and Reclassification of Maternal Deaths 2010 | Surveillance       |      | 2010                 | 15 - 44 years | MMR         |
| Mexico: Chihuahua | Mexico Intentional Search and Reclassification of Maternal Deaths 2011 | Surveillance       |      | 2011                 | 10 - 44 years | MMR         |
| Mexico: Chihuahua | Mexico Intentional Search and Reclassification of Maternal Deaths 2012 | Surveillance       |      | 2012                 | 15 - 44 years | MMR         |
| Mexico: Chihuahua | Mexico Intentional Search and Reclassification of Maternal Deaths 2013 | Surveillance       |      | 2013                 | 10 - 44 years | MMR         |
| Mexico: Chihuahua | Mexico Vital Registration System - Mortality                           | Vital Registration |      | 1980-2008, 2010-2014 | All Ages      | 519446      |
| Mexico: Chihuahua | Mexico Vital Statistics - Deaths 2009                                  | Vital Registration |      | 2009                 | All Ages      | 20869       |
| Mexico: Coahuila  | Mexico Intentional Search and Reclassification of Maternal Deaths 2005 | Surveillance       |      | 2005                 | 15 - 39 years | MMR         |
| Mexico: Coahuila  | Mexico Intentional Search and Reclassification of Maternal Deaths 2006 | Surveillance       |      | 2006                 | 15 - 44 years | MMR         |
| Mexico: Coahuila  | Mexico Intentional Search and Reclassification of Maternal Deaths 2008 | Surveillance       |      | 2008                 | 15 - 39 years | MMR         |
| Mexico: Coahuila  | Mexico Intentional Search and Reclassification of Maternal Deaths 2009 | Surveillance       |      | 2009                 | 15 - 39 years | MMR         |
| Mexico: Coahuila  | Mexico Intentional Search and Reclassification of Maternal Deaths 2010 | Surveillance       |      | 2010                 | 15 - 44 years | MMR         |
| Mexico: Coahuila  | Mexico Intentional Search and Reclassification of Maternal Deaths 2011 | Surveillance       |      | 2011                 | 15 - 44 years | MMR         |
| Mexico: Coahuila  | Mexico Intentional Search and Reclassification of Maternal Deaths 2012 | Surveillance       |      | 2012                 | 15 - 39 years | MMR         |
| Mexico: Coahuila  | Mexico Intentional Search and Reclassification of Maternal Deaths 2013 | Surveillance       |      | 2013                 | 15 - 44 years | MMR         |
| Mexico: Coahuila  | Mexico Vital Registration System - Mortality                           | Vital Registration |      | 1980-2008, 2010-2014 | All Ages      | 350621      |
| Mexico: Coahuila  | Mexico Vital Statistics - Deaths 2009                                  | Vital Registration |      | 2009                 | All Ages      | 12746       |
| Mexico: Colima    | Mexico Intentional Search and Reclassification of Maternal Deaths 2005 | Surveillance       |      | 2005                 | 30 - 34 years | MMR         |
| Mexico: Colima    | Mexico Intentional Search and Reclassification of Maternal Deaths 2006 | Surveillance       |      | 2006                 | 15 - 34 years | MMR         |
| Mexico: Colima    | Mexico Intentional Search and Reclassification of Maternal Deaths 2008 | Surveillance       |      | 2008                 | 15 - 39 years | MMR         |
| Mexico: Colima    | Mexico Intentional Search and Reclassification of Maternal Deaths 2009 | Surveillance       |      | 2009                 | 15 - 39 years | MMR         |
| Mexico: Colima    | Mexico Intentional Search and Reclassification of Maternal Deaths 2011 | Surveillance       |      | 2011                 | 15 - 34 years | MMR         |
| Mexico: Colima    | Mexico Intentional Search and Reclassification of Maternal Deaths 2012 | Surveillance       |      | 2012                 | 25 - 49 years | MMR         |

**Appendix Table 6: Causes of death data source list by geography, source type, and study site, with years, age range, and sample size, excluding sources on lower respiratory infection and diarrhoea etiologies**

| Location                 | Source name                                                            | Source type        | Site | Years                | Ages          | Sample size |
|--------------------------|------------------------------------------------------------------------|--------------------|------|----------------------|---------------|-------------|
| Mexico: Colima           | Mexico Intentional Search and Reclassification of Maternal Deaths 2013 | Surveillance       |      | 2013                 | 15 - 34 years | MMR         |
| Mexico: Colima           | Mexico Vital Registration System - Mortality                           | Vital Registration |      | 1980-2008, 2010-2014 | All Ages      | 83744       |
| Mexico: Colima           | Mexico Vital Statistics - Deaths 2009                                  | Vital Registration |      | 2009                 | All Ages      | 2904        |
| Mexico: Distrito Federal | Mexico Intentional Search and Reclassification of Maternal Deaths 2005 | Surveillance       |      | 2005                 | 10 - 49 years | MMR         |
| Mexico: Distrito Federal | Mexico Intentional Search and Reclassification of Maternal Deaths 2006 | Surveillance       |      | 2006                 | 15 - 44 years | MMR         |
| Mexico: Distrito Federal | Mexico Intentional Search and Reclassification of Maternal Deaths 2008 | Surveillance       |      | 2008                 | 15 - 44 years | MMR         |
| Mexico: Distrito Federal | Mexico Intentional Search and Reclassification of Maternal Deaths 2009 | Surveillance       |      | 2009                 | 15 - 44 years | MMR         |
| Mexico: Distrito Federal | Mexico Intentional Search and Reclassification of Maternal Deaths 2010 | Surveillance       |      | 2010                 | 15 - 54 years | MMR         |
| Mexico: Distrito Federal | Mexico Intentional Search and Reclassification of Maternal Deaths 2011 | Surveillance       |      | 2011                 | 15 - 44 years | MMR         |
| Mexico: Distrito Federal | Mexico Intentional Search and Reclassification of Maternal Deaths 2012 | Surveillance       |      | 2012                 | 10 - 49 years | MMR         |
| Mexico: Distrito Federal | Mexico Intentional Search and Reclassification of Maternal Deaths 2013 | Surveillance       |      | 2013                 | 15 - 49 years | MMR         |
| Mexico: Distrito Federal | Mexico Vital Registration System - Mortality                           | Vital Registration |      | 1980-2008, 2010-2014 | All Ages      | 1560430     |
| Mexico: Distrito Federal | Mexico Vital Statistics - Deaths 2009                                  | Vital Registration |      | 2009                 | All Ages      | 50416       |
| Mexico: Durango          | Mexico Intentional Search and Reclassification of Maternal Deaths 2005 | Surveillance       |      | 2005                 | 15 - 49 years | MMR         |
| Mexico: Durango          | Mexico Intentional Search and Reclassification of Maternal Deaths 2006 | Surveillance       |      | 2006                 | 20 - 44 years | MMR         |
| Mexico: Durango          | Mexico Intentional Search and Reclassification of Maternal Deaths 2008 | Surveillance       |      | 2008                 | 15 - 49 years | MMR         |
| Mexico: Durango          | Mexico Intentional Search and Reclassification of Maternal Deaths 2009 | Surveillance       |      | 2009                 | 15 - 49 years | MMR         |
| Mexico: Durango          | Mexico Intentional Search and Reclassification of Maternal Deaths 2010 | Surveillance       |      | 2010                 | 15 - 44 years | MMR         |
| Mexico: Durango          | Mexico Intentional Search and Reclassification of Maternal Deaths 2011 | Surveillance       |      | 2011                 | 20 - 49 years | MMR         |
| Mexico: Durango          | Mexico Intentional Search and Reclassification of Maternal Deaths 2012 | Surveillance       |      | 2012                 | 15 - 39 years | MMR         |
| Mexico: Durango          | Mexico Intentional Search and Reclassification of Maternal Deaths 2013 | Surveillance       |      | 2013                 | 10 - 44 years | MMR         |
| Mexico: Durango          | Mexico Vital Registration System - Mortality                           | Vital Registration |      | 1980-2008, 2010-2014 | All Ages      | 211601      |
| Mexico: Durango          | Mexico Vital Statistics - Deaths 2009                                  | Vital Registration |      | 2009                 | All Ages      | 8845        |
| Mexico: Guanajuato       | Mexico Intentional Search and Reclassification of Maternal Deaths 2005 | Surveillance       |      | 2005                 | 10 - 44 years | MMR         |
| Mexico: Guanajuato       | Mexico Intentional Search and Reclassification of Maternal Deaths 2006 | Surveillance       |      | 2006                 | 15 - 49 years | MMR         |
| Mexico: Guanajuato       | Mexico Intentional Search and Reclassification of Maternal Deaths 2008 | Surveillance       |      | 2008                 | 15 - 49 years | MMR         |
| Mexico: Guanajuato       | Mexico Intentional Search and Reclassification of Maternal Deaths 2009 | Surveillance       |      | 2009                 | 15 - 49 years | MMR         |
| Mexico: Guanajuato       | Mexico Intentional Search and Reclassification of Maternal Deaths 2010 | Surveillance       |      | 2010                 | 15 - 44 years | MMR         |
| Mexico: Guanajuato       | Mexico Intentional Search and Reclassification of Maternal Deaths 2011 | Surveillance       |      | 2011                 | 15 - 44 years | MMR         |

**Appendix Table 6: Causes of death data source list by geography, source type, and study site, with years, age range, and sample size, excluding sources on lower respiratory infection and diarrhoea etiologies**

| Location           | Source name                                                                                              | Source type        | Site             | Years                | Ages            | Sample size |
|--------------------|----------------------------------------------------------------------------------------------------------|--------------------|------------------|----------------------|-----------------|-------------|
| Mexico: Guanajuato | Mexico Intentional Search and Reclassification of Maternal Deaths 2012                                   | Surveillance       |                  | 2012                 | 15 - 49 years   | MMR         |
| Mexico: Guanajuato | Mexico Intentional Search and Reclassification of Maternal Deaths 2013                                   | Surveillance       |                  | 2013                 | 10 - 49 years   | MMR         |
| Mexico: Guanajuato | Mexico Vital Registration System - Mortality                                                             | Vital Registration |                  | 1980-2008, 2010-2014 | All Ages        | 746731      |
| Mexico: Guanajuato | Mexico Vital Statistics - Deaths 2009                                                                    | Vital Registration |                  | 2009                 | All Ages        | 23814       |
| Mexico: Guerrero   | Mexico Intentional Search and Reclassification of Maternal Deaths 2005                                   | Surveillance       |                  | 2005                 | 10 - 49 years   | MMR         |
| Mexico: Guerrero   | Mexico Intentional Search and Reclassification of Maternal Deaths 2006                                   | Surveillance       |                  | 2006                 | 15 - 49 years   | MMR         |
| Mexico: Guerrero   | Mexico Intentional Search and Reclassification of Maternal Deaths 2008                                   | Surveillance       |                  | 2008                 | 10 - 44 years   | MMR         |
| Mexico: Guerrero   | Mexico Intentional Search and Reclassification of Maternal Deaths 2009                                   | Surveillance       |                  | 2009                 | 10 - 44 years   | MMR         |
| Mexico: Guerrero   | Mexico Intentional Search and Reclassification of Maternal Deaths 2010                                   | Surveillance       |                  | 2010                 | 15 - 54 years   | MMR         |
| Mexico: Guerrero   | Mexico Intentional Search and Reclassification of Maternal Deaths 2011                                   | Surveillance       |                  | 2011                 | 15 - 54 years   | MMR         |
| Mexico: Guerrero   | Mexico Intentional Search and Reclassification of Maternal Deaths 2012                                   | Surveillance       |                  | 2012                 | 15 - 49 years   | MMR         |
| Mexico: Guerrero   | Mexico Intentional Search and Reclassification of Maternal Deaths 2013                                   | Surveillance       |                  | 2013                 | 15 - 49 years   | MMR         |
| Mexico: Guerrero   | Characteristics associated with under-registration of children's deaths in the state of Guerrero, Mexico | Verbal Autopsy     | Guerrero [rural] | 1993                 | birth - 4 years | 366         |
| Mexico: Guerrero   | Mexico Vital Registration System - Mortality                                                             | Vital Registration |                  | 1980-2008, 2010-2014 | All Ages        | 379057      |
| Mexico: Guerrero   | Mexico Vital Statistics - Deaths 2009                                                                    | Vital Registration |                  | 2009                 | All Ages        | 15486       |
| Mexico: Hidalgo    | Mexico Intentional Search and Reclassification of Maternal Deaths 2005                                   | Surveillance       |                  | 2005                 | 15 - 49 years   | MMR         |
| Mexico: Hidalgo    | Mexico Intentional Search and Reclassification of Maternal Deaths 2006                                   | Surveillance       |                  | 2006                 | 15 - 44 years   | MMR         |
| Mexico: Hidalgo    | Mexico Intentional Search and Reclassification of Maternal Deaths 2008                                   | Surveillance       |                  | 2008                 | 15 - 49 years   | MMR         |
| Mexico: Hidalgo    | Mexico Intentional Search and Reclassification of Maternal Deaths 2009                                   | Surveillance       |                  | 2009                 | 15 - 49 years   | MMR         |
| Mexico: Hidalgo    | Mexico Intentional Search and Reclassification of Maternal Deaths 2010                                   | Surveillance       |                  | 2010                 | 15 - 39 years   | MMR         |
| Mexico: Hidalgo    | Mexico Intentional Search and Reclassification of Maternal Deaths 2011                                   | Surveillance       |                  | 2011                 | 15 - 44 years   | MMR         |
| Mexico: Hidalgo    | Mexico Intentional Search and Reclassification of Maternal Deaths 2012                                   | Surveillance       |                  | 2012                 | 15 - 44 years   | MMR         |
| Mexico: Hidalgo    | Mexico Intentional Search and Reclassification of Maternal Deaths 2013                                   | Surveillance       |                  | 2013                 | 15 - 44 years   | MMR         |
| Mexico: Hidalgo    | Mexico Vital Registration System - Mortality                                                             | Vital Registration |                  | 1980-2008, 2010-2014 | All Ages        | 355019      |
| Mexico: Hidalgo    | Mexico Vital Statistics - Deaths 2009                                                                    | Vital Registration |                  | 2009                 | All Ages        | 12180       |
| Mexico: Jalisco    | Mexico Intentional Search and Reclassification of Maternal Deaths 2005                                   | Surveillance       |                  | 2005                 | 15 - 44 years   | MMR         |
| Mexico: Jalisco    | Mexico Intentional Search and Reclassification of Maternal Deaths 2006                                   | Surveillance       |                  | 2006                 | 15 - 44 years   | MMR         |
| Mexico: Jalisco    | Mexico Intentional Search and Reclassification of Maternal Deaths 2008                                   | Surveillance       |                  | 2008                 | 15 - 49 years   | MMR         |
| Mexico: Jalisco    | Mexico Intentional Search and Reclassification of Maternal Deaths 2009                                   | Surveillance       |                  | 2009                 | 15 - 49 years   | MMR         |

**Appendix Table 6: Causes of death data source list by geography, source type, and study site, with years, age range, and sample size, excluding sources on lower respiratory infection and diarrhoea etiologies**

| Location                    | Source name                                                            | Source type        | Site | Years                | Ages          | Sample size |
|-----------------------------|------------------------------------------------------------------------|--------------------|------|----------------------|---------------|-------------|
| Mexico: Jalisco             | Mexico Intentional Search and Reclassification of Maternal Deaths 2010 | Surveillance       |      | 2010                 | 15 - 44 years | MMR         |
| Mexico: Jalisco             | Mexico Intentional Search and Reclassification of Maternal Deaths 2011 | Surveillance       |      | 2011                 | 10 - 44 years | MMR         |
| Mexico: Jalisco             | Mexico Intentional Search and Reclassification of Maternal Deaths 2012 | Surveillance       |      | 2012                 | 15 - 44 years | MMR         |
| Mexico: Jalisco             | Mexico Intentional Search and Reclassification of Maternal Deaths 2013 | Surveillance       |      | 2013                 | 15 - 44 years | MMR         |
| Mexico: Jalisco             | Mexico Vital Registration System - Mortality                           | Vital Registration |      | 1980-2008, 2010-2014 | All Ages      | 1035213     |
| Mexico: Jalisco             | Mexico Vital Statistics - Deaths 2009                                  | Vital Registration |      | 2009                 | All Ages      | 35371       |
| Mexico: México              | Mexico Intentional Search and Reclassification of Maternal Deaths 2005 | Surveillance       |      | 2005                 | 10 - 49 years | MMR         |
| Mexico: México              | Mexico Intentional Search and Reclassification of Maternal Deaths 2006 | Surveillance       |      | 2006                 | 15 - 49 years | MMR         |
| Mexico: México              | Mexico Intentional Search and Reclassification of Maternal Deaths 2008 | Surveillance       |      | 2008                 | 15 - 49 years | MMR         |
| Mexico: México              | Mexico Intentional Search and Reclassification of Maternal Deaths 2009 | Surveillance       |      | 2009                 | 15 - 49 years | MMR         |
| Mexico: México              | Mexico Intentional Search and Reclassification of Maternal Deaths 2010 | Surveillance       |      | 2010                 | 10 - 49 years | MMR         |
| Mexico: México              | Mexico Intentional Search and Reclassification of Maternal Deaths 2011 | Surveillance       |      | 2011                 | 15 - 54 years | MMR         |
| Mexico: México              | Mexico Intentional Search and Reclassification of Maternal Deaths 2012 | Surveillance       |      | 2012                 | 15 - 54 years | MMR         |
| Mexico: México              | Mexico Intentional Search and Reclassification of Maternal Deaths 2013 | Surveillance       |      | 2013                 | 15 - 49 years | MMR         |
| Mexico: México              | Mexico Vital Registration System - Mortality                           | Vital Registration |      | 1980-2008, 2010-2014 | All Ages      | 1773658     |
| Mexico: México              | Mexico Vital Statistics - Deaths 2009                                  | Vital Registration |      | 2009                 | All Ages      | 61674       |
| Mexico: Michoacán de Ocampo | Mexico Intentional Search and Reclassification of Maternal Deaths 2005 | Surveillance       |      | 2005                 | 10 - 49 years | MMR         |
| Mexico: Michoacán de Ocampo | Mexico Intentional Search and Reclassification of Maternal Deaths 2006 | Surveillance       |      | 2006                 | 15 - 44 years | MMR         |
| Mexico: Michoacán de Ocampo | Mexico Intentional Search and Reclassification of Maternal Deaths 2008 | Surveillance       |      | 2008                 | 15 - 44 years | MMR         |
| Mexico: Michoacán de Ocampo | Mexico Intentional Search and Reclassification of Maternal Deaths 2009 | Surveillance       |      | 2009                 | 15 - 44 years | MMR         |
| Mexico: Michoacán de Ocampo | Mexico Intentional Search and Reclassification of Maternal Deaths 2010 | Surveillance       |      | 2010                 | 15 - 49 years | MMR         |
| Mexico: Michoacán de Ocampo | Mexico Intentional Search and Reclassification of Maternal Deaths 2011 | Surveillance       |      | 2011                 | 15 - 49 years | MMR         |
| Mexico: Michoacán de Ocampo | Mexico Intentional Search and Reclassification of Maternal Deaths 2012 | Surveillance       |      | 2012                 | 15 - 44 years | MMR         |
| Mexico: Michoacán de Ocampo | Mexico Intentional Search and Reclassification of Maternal Deaths 2013 | Surveillance       |      | 2013                 | 10 - 44 years | MMR         |
| Mexico: Michoacán de Ocampo | Mexico Vital Registration System - Mortality                           | Vital Registration |      | 1980-2008, 2010-2014 | All Ages      | 633828      |
| Mexico: Michoacán de Ocampo | Mexico Vital Statistics - Deaths 2009                                  | Vital Registration |      | 2009                 | All Ages      | 22039       |
| Mexico: Morelos             | Mexico Intentional Search and Reclassification of Maternal Deaths 2005 | Surveillance       |      | 2005                 | 15 - 49 years | MMR         |
| Mexico: Morelos             | Mexico Intentional Search and Reclassification of Maternal Deaths 2006 | Surveillance       |      | 2006                 | 10 - 44 years | MMR         |
| Mexico: Morelos             | Mexico Intentional Search and Reclassification of Maternal Deaths 2008 | Surveillance       |      | 2008                 | 15 - 44 years | MMR         |



**Appendix Table 6: Causes of death data source list by geography, source type, and study site, with years, age range, and sample size, excluding sources on lower respiratory infection and diarrhoea etiologies**

| Location           | Source name                                                            | Source type        | Site | Years                | Ages          | Sample size |
|--------------------|------------------------------------------------------------------------|--------------------|------|----------------------|---------------|-------------|
| Mexico: Morelos    | Mexico Intentional Search and Reclassification of Maternal Deaths 2009 | Surveillance       |      | 2009                 | 15 - 44 years | MMR         |
| Mexico: Morelos    | Mexico Intentional Search and Reclassification of Maternal Deaths 2010 | Surveillance       |      | 2010                 | 15 - 44 years | MMR         |
| Mexico: Morelos    | Mexico Intentional Search and Reclassification of Maternal Deaths 2011 | Surveillance       |      | 2011                 | 10 - 44 years | MMR         |
| Mexico: Morelos    | Mexico Intentional Search and Reclassification of Maternal Deaths 2012 | Surveillance       |      | 2012                 | 15 - 44 years | MMR         |
| Mexico: Morelos    | Mexico Intentional Search and Reclassification of Maternal Deaths 2013 | Surveillance       |      | 2013                 | 15 - 39 years | MMR         |
| Mexico: Morelos    | Mexico Vital Registration System - Mortality                           | Vital Registration |      | 1980-2008, 2010-2014 | All Ages      | 229516      |
| Mexico: Morelos    | Mexico Vital Statistics - Deaths 2009                                  | Vital Registration |      | 2009                 | All Ages      | 8484        |
| Mexico: Nayarit    | Mexico Intentional Search and Reclassification of Maternal Deaths 2005 | Surveillance       |      | 2005                 | 15 - 49 years | MMR         |
| Mexico: Nayarit    | Mexico Intentional Search and Reclassification of Maternal Deaths 2006 | Surveillance       |      | 2006                 | 15 - 44 years | MMR         |
| Mexico: Nayarit    | Mexico Intentional Search and Reclassification of Maternal Deaths 2008 | Surveillance       |      | 2008                 | 10 - 44 years | MMR         |
| Mexico: Nayarit    | Mexico Intentional Search and Reclassification of Maternal Deaths 2009 | Surveillance       |      | 2009                 | 10 - 44 years | MMR         |
| Mexico: Nayarit    | Mexico Intentional Search and Reclassification of Maternal Deaths 2010 | Surveillance       |      | 2010                 | 15 - 34 years | MMR         |
| Mexico: Nayarit    | Mexico Intentional Search and Reclassification of Maternal Deaths 2011 | Surveillance       |      | 2011                 | 10 - 49 years | MMR         |
| Mexico: Nayarit    | Mexico Intentional Search and Reclassification of Maternal Deaths 2012 | Surveillance       |      | 2012                 | 15 - 44 years | MMR         |
| Mexico: Nayarit    | Mexico Intentional Search and Reclassification of Maternal Deaths 2013 | Surveillance       |      | 2013                 | 15 - 44 years | MMR         |
| Mexico: Nayarit    | Mexico Vital Registration System - Mortality                           | Vital Registration |      | 1980-2008, 2010-2014 | All Ages      | 140306      |
| Mexico: Nayarit    | Mexico Vital Statistics - Deaths 2009                                  | Vital Registration |      | 2009                 | All Ages      | 5076        |
| Mexico: Nuevo León | Mexico Intentional Search and Reclassification of Maternal Deaths 2005 | Surveillance       |      | 2005                 | 15 - 44 years | MMR         |
| Mexico: Nuevo León | Mexico Intentional Search and Reclassification of Maternal Deaths 2006 | Surveillance       |      | 2006                 | 15 - 39 years | MMR         |
| Mexico: Nuevo León | Mexico Intentional Search and Reclassification of Maternal Deaths 2008 | Surveillance       |      | 2008                 | 15 - 44 years | MMR         |
| Mexico: Nuevo León | Mexico Intentional Search and Reclassification of Maternal Deaths 2009 | Surveillance       |      | 2009                 | 15 - 44 years | MMR         |
| Mexico: Nuevo León | Mexico Intentional Search and Reclassification of Maternal Deaths 2010 | Surveillance       |      | 2010                 | 15 - 39 years | MMR         |
| Mexico: Nuevo León | Mexico Intentional Search and Reclassification of Maternal Deaths 2011 | Surveillance       |      | 2011                 | 15 - 39 years | MMR         |
| Mexico: Nuevo León | Mexico Intentional Search and Reclassification of Maternal Deaths 2012 | Surveillance       |      | 2012                 | 15 - 44 years | MMR         |
| Mexico: Nuevo León | Mexico Intentional Search and Reclassification of Maternal Deaths 2013 | Surveillance       |      | 2013                 | 20 - 44 years | MMR         |
| Mexico: Nuevo León | Mexico Vital Registration System - Mortality                           | Vital Registration |      | 1980-2008, 2010-2014 | All Ages      | 521847      |
| Mexico: Nuevo León | Mexico Vital Statistics - Deaths 2009                                  | Vital Registration |      | 2009                 | All Ages      | 20804       |
| Mexico: Oaxaca     | Mexico Intentional Search and Reclassification of Maternal Deaths 2005 | Surveillance       |      | 2005                 | 15 - 44 years | MMR         |
| Mexico: Oaxaca     | Mexico Intentional Search and Reclassification of Maternal Deaths 2006 | Surveillance       |      | 2006                 | 10 - 44 years | MMR         |

**Appendix Table 6: Causes of death data source list by geography, source type, and study site, with years, age range, and sample size, excluding sources on lower respiratory infection and diarrhoea etiologies**

| Location             | Source name                                                            | Source type        | Site | Years                | Ages          | Sample size |
|----------------------|------------------------------------------------------------------------|--------------------|------|----------------------|---------------|-------------|
| Mexico: Oaxaca       | Mexico Intentional Search and Reclassification of Maternal Deaths 2008 | Surveillance       |      | 2008                 | 15 - 44 years | MMR         |
| Mexico: Oaxaca       | Mexico Intentional Search and Reclassification of Maternal Deaths 2009 | Surveillance       |      | 2009                 | 15 - 44 years | MMR         |
| Mexico: Oaxaca       | Mexico Intentional Search and Reclassification of Maternal Deaths 2010 | Surveillance       |      | 2010                 | 15 - 49 years | MMR         |
| Mexico: Oaxaca       | Mexico Intentional Search and Reclassification of Maternal Deaths 2011 | Surveillance       |      | 2011                 | 10 - 49 years | MMR         |
| Mexico: Oaxaca       | Mexico Intentional Search and Reclassification of Maternal Deaths 2012 | Surveillance       |      | 2012                 | 15 - 44 years | MMR         |
| Mexico: Oaxaca       | Mexico Intentional Search and Reclassification of Maternal Deaths 2013 | Surveillance       |      | 2013                 | 15 - 49 years | MMR         |
| Mexico: Oaxaca       | Mexico Vital Registration System - Mortality                           | Vital Registration |      | 1980-2008, 2010-2014 | All Ages      | 630599      |
| Mexico: Oaxaca       | Mexico Vital Statistics - Deaths 2009                                  | Vital Registration |      | 2009                 | All Ages      | 19076       |
| Mexico: Puebla       | Mexico Intentional Search and Reclassification of Maternal Deaths 2005 | Surveillance       |      | 2005                 | 15 - 44 years | MMR         |
| Mexico: Puebla       | Mexico Intentional Search and Reclassification of Maternal Deaths 2006 | Surveillance       |      | 2006                 | 15 - 49 years | MMR         |
| Mexico: Puebla       | Mexico Intentional Search and Reclassification of Maternal Deaths 2008 | Surveillance       |      | 2008                 | 15 - 49 years | MMR         |
| Mexico: Puebla       | Mexico Intentional Search and Reclassification of Maternal Deaths 2009 | Surveillance       |      | 2009                 | 15 - 49 years | MMR         |
| Mexico: Puebla       | Mexico Intentional Search and Reclassification of Maternal Deaths 2010 | Surveillance       |      | 2010                 | 10 - 44 years | MMR         |
| Mexico: Puebla       | Mexico Intentional Search and Reclassification of Maternal Deaths 2011 | Surveillance       |      | 2011                 | 15 - 44 years | MMR         |
| Mexico: Puebla       | Mexico Intentional Search and Reclassification of Maternal Deaths 2012 | Surveillance       |      | 2012                 | 15 - 44 years | MMR         |
| Mexico: Puebla       | Mexico Intentional Search and Reclassification of Maternal Deaths 2013 | Surveillance       |      | 2013                 | 15 - 54 years | MMR         |
| Mexico: Puebla       | Mexico Vital Registration System - Mortality                           | Vital Registration |      | 1980-2008, 2010-2014 | All Ages      | 905837      |
| Mexico: Puebla       | Mexico Vital Statistics - Deaths 2009                                  | Vital Registration |      | 2009                 | All Ages      | 28235       |
| Mexico: Querétaro    | Mexico Intentional Search and Reclassification of Maternal Deaths 2005 | Surveillance       |      | 2005                 | 15 - 44 years | MMR         |
| Mexico: Querétaro    | Mexico Intentional Search and Reclassification of Maternal Deaths 2006 | Surveillance       |      | 2006                 | 15 - 44 years | MMR         |
| Mexico: Querétaro    | Mexico Intentional Search and Reclassification of Maternal Deaths 2008 | Surveillance       |      | 2008                 | 15 - 44 years | MMR         |
| Mexico: Querétaro    | Mexico Intentional Search and Reclassification of Maternal Deaths 2009 | Surveillance       |      | 2009                 | 15 - 44 years | MMR         |
| Mexico: Querétaro    | Mexico Intentional Search and Reclassification of Maternal Deaths 2010 | Surveillance       |      | 2010                 | 15 - 44 years | MMR         |
| Mexico: Querétaro    | Mexico Intentional Search and Reclassification of Maternal Deaths 2011 | Surveillance       |      | 2011                 | 15 - 44 years | MMR         |
| Mexico: Querétaro    | Mexico Intentional Search and Reclassification of Maternal Deaths 2012 | Surveillance       |      | 2012                 | 15 - 44 years | MMR         |
| Mexico: Querétaro    | Mexico Intentional Search and Reclassification of Maternal Deaths 2013 | Surveillance       |      | 2013                 | 15 - 44 years | MMR         |
| Mexico: Querétaro    | Mexico Vital Registration System - Mortality                           | Vital Registration |      | 1980-2008, 2010-2014 | All Ages      | 199997      |
| Mexico: Querétaro    | Mexico Vital Statistics - Deaths 2009                                  | Vital Registration |      | 2009                 | All Ages      | 7124        |
| Mexico: Quintana Roo | Mexico Intentional Search and Reclassification of Maternal Deaths 2005 | Surveillance       |      | 2005                 | 15 - 34 years | MMR         |

**Appendix Table 6: Causes of death data source list by geography, source type, and study site, with years, age range, and sample size, excluding sources on lower respiratory infection and diarrhoea etiologies**

| Location                | Source name                                                            | Source type        | Site | Years                | Ages          | Sample size |
|-------------------------|------------------------------------------------------------------------|--------------------|------|----------------------|---------------|-------------|
| Mexico: Quintana Roo    | Mexico Intentional Search and Reclassification of Maternal Deaths 2006 | Surveillance       |      | 2006                 | 15 - 34 years | MMR         |
| Mexico: Quintana Roo    | Mexico Intentional Search and Reclassification of Maternal Deaths 2008 | Surveillance       |      | 2008                 | 10 - 39 years | MMR         |
| Mexico: Quintana Roo    | Mexico Intentional Search and Reclassification of Maternal Deaths 2009 | Surveillance       |      | 2009                 | 10 - 39 years | MMR         |
| Mexico: Quintana Roo    | Mexico Intentional Search and Reclassification of Maternal Deaths 2010 | Surveillance       |      | 2010                 | 15 - 39 years | MMR         |
| Mexico: Quintana Roo    | Mexico Intentional Search and Reclassification of Maternal Deaths 2011 | Surveillance       |      | 2011                 | 15 - 49 years | MMR         |
| Mexico: Quintana Roo    | Mexico Intentional Search and Reclassification of Maternal Deaths 2012 | Surveillance       |      | 2012                 | 15 - 49 years | MMR         |
| Mexico: Quintana Roo    | Mexico Intentional Search and Reclassification of Maternal Deaths 2013 | Surveillance       |      | 2013                 | 15 - 49 years | MMR         |
| Mexico: Quintana Roo    | Mexico Vital Registration System - Mortality                           | Vital Registration |      | 1980-2008, 2010-2014 | All Ages      | 76691       |
| Mexico: Quintana Roo    | Mexico Vital Statistics - Deaths 2009                                  | Vital Registration |      | 2009                 | All Ages      | 3842        |
| Mexico: San Luis Potosi | Mexico Intentional Search and Reclassification of Maternal Deaths 2005 | Surveillance       |      | 2005                 | 15 - 49 years | MMR         |
| Mexico: San Luis Potosi | Mexico Intentional Search and Reclassification of Maternal Deaths 2006 | Surveillance       |      | 2006                 | 15 - 39 years | MMR         |
| Mexico: San Luis Potosi | Mexico Intentional Search and Reclassification of Maternal Deaths 2008 | Surveillance       |      | 2008                 | 15 - 49 years | MMR         |
| Mexico: San Luis Potosi | Mexico Intentional Search and Reclassification of Maternal Deaths 2009 | Surveillance       |      | 2009                 | 15 - 49 years | MMR         |
| Mexico: San Luis Potosi | Mexico Intentional Search and Reclassification of Maternal Deaths 2010 | Surveillance       |      | 2010                 | 15 - 44 years | MMR         |
| Mexico: San Luis Potosi | Mexico Intentional Search and Reclassification of Maternal Deaths 2011 | Surveillance       |      | 2011                 | 15 - 44 years | MMR         |
| Mexico: San Luis Potosi | Mexico Intentional Search and Reclassification of Maternal Deaths 2012 | Surveillance       |      | 2012                 | 15 - 44 years | MMR         |
| Mexico: San Luis Potosi | Mexico Intentional Search and Reclassification of Maternal Deaths 2013 | Surveillance       |      | 2013                 | 15 - 44 years | MMR         |
| Mexico: San Luis Potosi | Mexico Vital Registration System - Mortality                           | Vital Registration |      | 1980-2008, 2010-2014 | All Ages      | 354459      |
| Mexico: San Luis Potosi | Mexico Vital Statistics - Deaths 2009                                  | Vital Registration |      | 2009                 | All Ages      | 11443       |
| Mexico: Sinaloa         | Mexico Intentional Search and Reclassification of Maternal Deaths 2005 | Surveillance       |      | 2005                 | 15 - 44 years | MMR         |
| Mexico: Sinaloa         | Mexico Intentional Search and Reclassification of Maternal Deaths 2006 | Surveillance       |      | 2006                 | 15 - 39 years | MMR         |
| Mexico: Sinaloa         | Mexico Intentional Search and Reclassification of Maternal Deaths 2008 | Surveillance       |      | 2008                 | 15 - 39 years | MMR         |
| Mexico: Sinaloa         | Mexico Intentional Search and Reclassification of Maternal Deaths 2009 | Surveillance       |      | 2009                 | 15 - 39 years | MMR         |
| Mexico: Sinaloa         | Mexico Intentional Search and Reclassification of Maternal Deaths 2010 | Surveillance       |      | 2010                 | 10 - 44 years | MMR         |
| Mexico: Sinaloa         | Mexico Intentional Search and Reclassification of Maternal Deaths 2011 | Surveillance       |      | 2011                 | 10 - 44 years | MMR         |
| Mexico: Sinaloa         | Mexico Intentional Search and Reclassification of Maternal Deaths 2012 | Surveillance       |      | 2012                 | 15 - 39 years | MMR         |
| Mexico: Sinaloa         | Mexico Intentional Search and Reclassification of Maternal Deaths 2013 | Surveillance       |      | 2013                 | 15 - 39 years | MMR         |
| Mexico: Sinaloa         | Mexico Vital Registration System - Mortality                           | Vital Registration |      | 1980-2008, 2010-2014 | All Ages      | 338434      |
| Mexico: Sinaloa         | Mexico Vital Statistics - Deaths 2009                                  | Vital Registration |      | 2009                 | All Ages      | 12848       |

**Appendix Table 6: Causes of death data source list by geography, source type, and study site, with years, age range, and sample size, excluding sources on lower respiratory infection and diarrhoea etiologies**

| Location           | Source name                                                            | Source type        | Site | Years                | Ages          | Sample size |
|--------------------|------------------------------------------------------------------------|--------------------|------|----------------------|---------------|-------------|
| Mexico: Sonora     | Mexico Intentional Search and Reclassification of Maternal Deaths 2005 | Surveillance       |      | 2005                 | 15 - 44 years | MMR         |
| Mexico: Sonora     | Mexico Intentional Search and Reclassification of Maternal Deaths 2006 | Surveillance       |      | 2006                 | 15 - 39 years | MMR         |
| Mexico: Sonora     | Mexico Intentional Search and Reclassification of Maternal Deaths 2008 | Surveillance       |      | 2008                 | 10 - 49 years | MMR         |
| Mexico: Sonora     | Mexico Intentional Search and Reclassification of Maternal Deaths 2009 | Surveillance       |      | 2009                 | 10 - 49 years | MMR         |
| Mexico: Sonora     | Mexico Intentional Search and Reclassification of Maternal Deaths 2010 | Surveillance       |      | 2010                 | 15 - 44 years | MMR         |
| Mexico: Sonora     | Mexico Intentional Search and Reclassification of Maternal Deaths 2011 | Surveillance       |      | 2011                 | 15 - 44 years | MMR         |
| Mexico: Sonora     | Mexico Intentional Search and Reclassification of Maternal Deaths 2012 | Surveillance       |      | 2012                 | 15 - 44 years | MMR         |
| Mexico: Sonora     | Mexico Intentional Search and Reclassification of Maternal Deaths 2013 | Surveillance       |      | 2013                 | 15 - 39 years | MMR         |
| Mexico: Sonora     | Mexico Vital Registration System - Mortality                           | Vital Registration |      | 1980-2008, 2010-2014 | All Ages      | 353281      |
| Mexico: Sonora     | Mexico Vital Statistics - Deaths 2009                                  | Vital Registration |      | 2009                 | All Ages      | 13045       |
| Mexico: Tabasco    | Mexico Intentional Search and Reclassification of Maternal Deaths 2005 | Surveillance       |      | 2005                 | 15 - 49 years | MMR         |
| Mexico: Tabasco    | Mexico Intentional Search and Reclassification of Maternal Deaths 2006 | Surveillance       |      | 2006                 | 15 - 39 years | MMR         |
| Mexico: Tabasco    | Mexico Intentional Search and Reclassification of Maternal Deaths 2008 | Surveillance       |      | 2008                 | 15 - 39 years | MMR         |
| Mexico: Tabasco    | Mexico Intentional Search and Reclassification of Maternal Deaths 2009 | Surveillance       |      | 2009                 | 15 - 39 years | MMR         |
| Mexico: Tabasco    | Mexico Intentional Search and Reclassification of Maternal Deaths 2010 | Surveillance       |      | 2010                 | 15 - 39 years | MMR         |
| Mexico: Tabasco    | Mexico Intentional Search and Reclassification of Maternal Deaths 2011 | Surveillance       |      | 2011                 | 15 - 39 years | MMR         |
| Mexico: Tabasco    | Mexico Intentional Search and Reclassification of Maternal Deaths 2012 | Surveillance       |      | 2012                 | 15 - 39 years | MMR         |
| Mexico: Tabasco    | Mexico Intentional Search and Reclassification of Maternal Deaths 2013 | Surveillance       |      | 2013                 | 15 - 49 years | MMR         |
| Mexico: Tabasco    | Mexico Vital Registration System - Mortality                           | Vital Registration |      | 1980-2008, 2010-2014 | All Ages      | 256008      |
| Mexico: Tabasco    | Mexico Vital Statistics - Deaths 2009                                  | Vital Registration |      | 2009                 | All Ages      | 9417        |
| Mexico: Tamaulipas | Mexico Intentional Search and Reclassification of Maternal Deaths 2005 | Surveillance       |      | 2005                 | 15 - 39 years | MMR         |
| Mexico: Tamaulipas | Mexico Intentional Search and Reclassification of Maternal Deaths 2006 | Surveillance       |      | 2006                 | 15 - 44 years | MMR         |
| Mexico: Tamaulipas | Mexico Intentional Search and Reclassification of Maternal Deaths 2008 | Surveillance       |      | 2008                 | 15 - 39 years | MMR         |
| Mexico: Tamaulipas | Mexico Intentional Search and Reclassification of Maternal Deaths 2009 | Surveillance       |      | 2009                 | 15 - 39 years | MMR         |
| Mexico: Tamaulipas | Mexico Intentional Search and Reclassification of Maternal Deaths 2010 | Surveillance       |      | 2010                 | 15 - 44 years | MMR         |
| Mexico: Tamaulipas | Mexico Intentional Search and Reclassification of Maternal Deaths 2011 | Surveillance       |      | 2011                 | 15 - 39 years | MMR         |
| Mexico: Tamaulipas | Mexico Intentional Search and Reclassification of Maternal Deaths 2012 | Surveillance       |      | 2012                 | 15 - 39 years | MMR         |
| Mexico: Tamaulipas | Mexico Intentional Search and Reclassification of Maternal Deaths 2013 | Surveillance       |      | 2013                 | 10 - 39 years | MMR         |
| Mexico: Tamaulipas | Mexico Vital Registration System - Mortality                           | Vital Registration |      | 1980-2008, 2010-2014 | All Ages      | 401069      |

**Appendix Table 6: Causes of death data source list by geography, source type, and study site, with years, age range, and sample size, excluding sources on lower respiratory infection and diarrhoea etiologies**

| Location                                | Source name                                                            | Source type        | Site | Years                | Ages          | Sample size |
|-----------------------------------------|------------------------------------------------------------------------|--------------------|------|----------------------|---------------|-------------|
| Mexico: Tamaulipas                      | Mexico Vital Statistics - Deaths 2009                                  | Vital Registration |      | 2009                 | All Ages      | 14800       |
| Mexico: Tlaxcala                        | Mexico Intentional Search and Reclassification of Maternal Deaths 2005 | Surveillance       |      | 2005                 | 15 - 39 years | MMR         |
| Mexico: Tlaxcala                        | Mexico Intentional Search and Reclassification of Maternal Deaths 2006 | Surveillance       |      | 2006                 | 15 - 39 years | MMR         |
| Mexico: Tlaxcala                        | Mexico Intentional Search and Reclassification of Maternal Deaths 2008 | Surveillance       |      | 2008                 | 20 - 44 years | MMR         |
| Mexico: Tlaxcala                        | Mexico Intentional Search and Reclassification of Maternal Deaths 2009 | Surveillance       |      | 2009                 | 20 - 44 years | MMR         |
| Mexico: Tlaxcala                        | Mexico Intentional Search and Reclassification of Maternal Deaths 2010 | Surveillance       |      | 2010                 | 15 - 39 years | MMR         |
| Mexico: Tlaxcala                        | Mexico Intentional Search and Reclassification of Maternal Deaths 2011 | Surveillance       |      | 2011                 | 15 - 44 years | MMR         |
| Mexico: Tlaxcala                        | Mexico Intentional Search and Reclassification of Maternal Deaths 2012 | Surveillance       |      | 2012                 | 15 - 39 years | MMR         |
| Mexico: Tlaxcala                        | Mexico Intentional Search and Reclassification of Maternal Deaths 2013 | Surveillance       |      | 2013                 | 20 - 39 years | MMR         |
| Mexico: Tlaxcala                        | Mexico Vital Registration System - Mortality                           | Vital Registration |      | 1980-2008, 2010-2014 | All Ages      | 151008      |
| Mexico: Tlaxcala                        | Mexico Vital Statistics - Deaths 2009                                  | Vital Registration |      | 2009                 | All Ages      | 5046        |
| Mexico: Veracruz de Ignacio de la Llave | Mexico Intentional Search and Reclassification of Maternal Deaths 2005 | Surveillance       |      | 2005                 | 10 - 44 years | MMR         |
| Mexico: Veracruz de Ignacio de la Llave | Mexico Intentional Search and Reclassification of Maternal Deaths 2006 | Surveillance       |      | 2006                 | 15 - 44 years | MMR         |
| Mexico: Veracruz de Ignacio de la Llave | Mexico Intentional Search and Reclassification of Maternal Deaths 2008 | Surveillance       |      | 2008                 | 10 - 44 years | MMR         |
| Mexico: Veracruz de Ignacio de la Llave | Mexico Intentional Search and Reclassification of Maternal Deaths 2009 | Surveillance       |      | 2009                 | 10 - 44 years | MMR         |
| Mexico: Veracruz de Ignacio de la Llave | Mexico Intentional Search and Reclassification of Maternal Deaths 2010 | Surveillance       |      | 2010                 | 15 - 44 years | MMR         |
| Mexico: Veracruz de Ignacio de la Llave | Mexico Intentional Search and Reclassification of Maternal Deaths 2011 | Surveillance       |      | 2011                 | 10 - 44 years | MMR         |
| Mexico: Veracruz de Ignacio de la Llave | Mexico Intentional Search and Reclassification of Maternal Deaths 2012 | Surveillance       |      | 2012                 | 15 - 44 years | MMR         |
| Mexico: Veracruz de Ignacio de la Llave | Mexico Intentional Search and Reclassification of Maternal Deaths 2013 | Surveillance       |      | 2013                 | 15 - 44 years | MMR         |
| Mexico: Veracruz de Ignacio de la Llave | Mexico Vital Registration System - Mortality                           | Vital Registration |      | 1980-2008, 2010-2014 | All Ages      | 1115326     |
| Mexico: Veracruz de Ignacio de la Llave | Mexico Vital Statistics - Deaths 2009                                  | Vital Registration |      | 2009                 | All Ages      | 40691       |
| Mexico: Yucatán                         | Mexico Intentional Search and Reclassification of Maternal Deaths 2005 | Surveillance       |      | 2005                 | 15 - 54 years | MMR         |
| Mexico: Yucatán                         | Mexico Intentional Search and Reclassification of Maternal Deaths 2006 | Surveillance       |      | 2006                 | 20 - 44 years | MMR         |
| Mexico: Yucatán                         | Mexico Intentional Search and Reclassification of Maternal Deaths 2008 | Surveillance       |      | 2008                 | 15 - 44 years | MMR         |
| Mexico: Yucatán                         | Mexico Intentional Search and Reclassification of Maternal Deaths 2009 | Surveillance       |      | 2009                 | 15 - 44 years | MMR         |
| Mexico: Yucatán                         | Mexico Intentional Search and Reclassification of Maternal Deaths 2010 | Surveillance       |      | 2010                 | 15 - 44 years | MMR         |
| Mexico: Yucatán                         | Mexico Intentional Search and Reclassification of Maternal Deaths 2011 | Surveillance       |      | 2011                 | 15 - 44 years | MMR         |
| Mexico: Yucatán                         | Mexico Intentional Search and Reclassification of Maternal Deaths 2012 | Surveillance       |      | 2012                 | 15 - 44 years | MMR         |
| Mexico: Yucatán                         | Mexico Intentional Search and Reclassification of Maternal Deaths 2013 | Surveillance       |      | 2013                 | 15 - 39 years | MMR         |

**Appendix Table 6: Causes of death data source list by geography, source type, and study site, with years, age range, and sample size, excluding sources on lower respiratory infection and diarrhoea etiologies**

| Location          | Source name                                                                                                                        | Source type        | Site                      | Years                                      | Ages            | Sample size |
|-------------------|------------------------------------------------------------------------------------------------------------------------------------|--------------------|---------------------------|--------------------------------------------|-----------------|-------------|
| Mexico: Yucatán   | Mexico Vital Registration System - Mortality                                                                                       | Vital Registration |                           | 1980-2008, 2010-2014                       | All Ages        | 276801      |
| Mexico: Yucatán   | Mexico Vital Statistics - Deaths 2009                                                                                              | Vital Registration |                           | 2009                                       | All Ages        | 9768        |
| Mexico: Zacatecas | Mexico Intentional Search and Reclassification of Maternal Deaths 2005                                                             | Surveillance       |                           | 2005                                       | 15 - 39 years   | MMR         |
| Mexico: Zacatecas | Mexico Intentional Search and Reclassification of Maternal Deaths 2006                                                             | Surveillance       |                           | 2006                                       | 20 - 44 years   | MMR         |
| Mexico: Zacatecas | Mexico Intentional Search and Reclassification of Maternal Deaths 2008                                                             | Surveillance       |                           | 2008                                       | 15 - 49 years   | MMR         |
| Mexico: Zacatecas | Mexico Intentional Search and Reclassification of Maternal Deaths 2009                                                             | Surveillance       |                           | 2009                                       | 15 - 49 years   | MMR         |
| Mexico: Zacatecas | Mexico Intentional Search and Reclassification of Maternal Deaths 2010                                                             | Surveillance       |                           | 2010                                       | 15 - 39 years   | MMR         |
| Mexico: Zacatecas | Mexico Intentional Search and Reclassification of Maternal Deaths 2011                                                             | Surveillance       |                           | 2011                                       | 20 - 34 years   | MMR         |
| Mexico: Zacatecas | Mexico Intentional Search and Reclassification of Maternal Deaths 2012                                                             | Surveillance       |                           | 2012                                       | 20 - 44 years   | MMR         |
| Mexico: Zacatecas | Mexico Intentional Search and Reclassification of Maternal Deaths 2013                                                             | Surveillance       |                           | 2013                                       | 15 - 39 years   | MMR         |
| Mexico: Zacatecas | Mexico Vital Registration System - Mortality                                                                                       | Vital Registration |                           | 1980-2008, 2010-2014                       | All Ages        | 217005      |
| Mexico: Zacatecas | Mexico Vital Statistics - Deaths 2009                                                                                              | Vital Registration |                           | 2009                                       | All Ages        | 7345        |
| Nicaragua         | United Nations Surveys on Crime Trends and the Operations of Criminal Justice Systems 1970-2006                                    | Police Records     |                           | 1990-1994                                  | All Ages        | Death Rate  |
| Nicaragua         | United Nations Office on Drugs and Crime Global Study on Homicide 2011                                                             | Police Records     | Nicaragua National police | 1995, 1997-2007, 2009-2010                 | All Ages        | Death Rate  |
| Nicaragua         | United Nations Office on Drugs and Crime Global Study on Homicide 2011                                                             | Police Records     | Nicaragua PAHO            | 1997-2006                                  | All Ages        | Death Rate  |
| Nicaragua         | Global Status Report on Road Safety 2009                                                                                           | Police Records     |                           | 2007                                       | All Ages        | Death Rate  |
| Nicaragua         | Reproductive Health Survey (RHS)                                                                                                   | Sibling history    |                           | 1980-1991                                  | 15 - 49 years   | 0           |
| Nicaragua         | Nicaragua Population and Housing Census 2005                                                                                       | Survey/Census      |                           | 2004-2005                                  | 15 - 49 years   | 5130        |
| Nicaragua         | Comparing progress toward the millennium development goal for under-five mortality in León and Cuatro Santos, Nicaragua, 1990-2008 | Verbal Autopsy     | León []                   | 2005                                       | birth - 4 years | 59          |
| Nicaragua         | Comparing progress toward the millennium development goal for under-five mortality in León and Cuatro Santos, Nicaragua, 1990-2008 | Verbal Autopsy     | Cuatro Santos []          | 2006                                       | birth - 4 years | 39          |
| Nicaragua         | WHO Mortality Database                                                                                                             | Vital Registration |                           | 1988-1994, 1996-2013                       | All Ages        | 386454      |
| Panama            | United Nations Surveys on Crime Trends and the Operations of Criminal Justice Systems 1970-2006                                    | Police Records     |                           | 1980                                       | All Ages        | Death Rate  |
| Panama            | United Nations Office on Drugs and Crime Global Study on Homicide 2011                                                             | Police Records     | Panama National police    | 1995-2007, 2009-2010                       | All Ages        | Death Rate  |
| Panama            | United Nations Office on Drugs and Crime Global Study on Homicide 2011                                                             | Police Records     | Panama PAHO               | 1996-2007                                  | All Ages        | Death Rate  |
| Panama            | WHO Mortality Database                                                                                                             | Vital Registration |                           | 1980-1989, 1996-2013                       | All Ages        | 339468      |
| Venezuela         | United Nations Office on Drugs and Crime Global Study on Homicide 2011                                                             | Police Records     | Venezuela NGO (d)         | 1995-2007, 2009                            | All Ages        | Death Rate  |
| Venezuela         | United Nations Office on Drugs and Crime Global Study on Homicide 2011                                                             | Police Records     | Venezuela PAHO            | 1996-2007                                  | All Ages        | Death Rate  |
| Venezuela         | WHO Mortality Database                                                                                                             | Vital Registration |                           | 1980-1983, 1985-1990, 1992-1994, 1996-2012 | All Ages        | 3125382     |
| Brazil: Acre      | Brazil Demographic and Health Survey - Maternal Mortality Data                                                                     | Sibling History    |                           | 1992                                       | 30 - 34 years   | 1           |

**Appendix Table 6: Causes of death data source list by geography, source type, and study site, with years, age range, and sample size, excluding sources on lower respiratory infection and diarrhoea etiologies**

| Location                 | Source name                                                                                                                                | Source type        | Site                                   | Years     | Ages             | Sample size |
|--------------------------|--------------------------------------------------------------------------------------------------------------------------------------------|--------------------|----------------------------------------|-----------|------------------|-------------|
| Brazil: Acre             | Brazil Demographic and Health Survey - Maternal Mortality Data                                                                             | Sibling History    |                                        | 1995      | 35 - 39 years    | 1           |
| Brazil: Acre             | Brazil Mortality Information System (SIM)                                                                                                  | Vital Registration |                                        | 1980-2013 | All Ages         | 78302       |
| Brazil: Alagoas          | Brazil Demographic and Health Survey - Maternal Mortality Data                                                                             | Sibling History    |                                        | 1982      | 35 - 39 years    | 1           |
| Brazil: Alagoas          | Brazil Demographic and Health Survey - Maternal Mortality Data                                                                             | Sibling History    |                                        | 1985      | 40 - 44 years    | 1           |
| Brazil: Alagoas          | Brazil Demographic and Health Survey - Maternal Mortality Data                                                                             | Sibling History    |                                        | 1988      | 35 - 49 years    | 2           |
| Brazil: Alagoas          | Brazil Demographic and Health Survey - Maternal Mortality Data                                                                             | Sibling History    |                                        | 1991-1992 | 20 - 29 years    | 2           |
| Brazil: Alagoas          | Brazil Demographic and Health Survey - Maternal Mortality Data                                                                             | Sibling History    |                                        | 1994      | 45 - 49 years    | 1           |
| Brazil: Alagoas          | Brazil Mortality Information System (SIM)                                                                                                  | Vital Registration |                                        | 1980-2013 | All Ages         | 549284      |
| Brazil: Amapá            | Brazil Demographic and Health Survey - Maternal Mortality Data                                                                             | Sibling History    |                                        | 1991      | 40 - 44 years    | 1           |
| Brazil: Amapá            | Brazil Mortality Information System (SIM)                                                                                                  | Vital Registration |                                        | 1980-2013 | All Ages         | 52503       |
| Brazil: Amazonas         | Brazil Demographic and Health Survey - Maternal Mortality Data                                                                             | Sibling History    |                                        | 1983-1989 | 25 - 29 years    | 2           |
| Brazil: Amazonas         | Brazil Demographic and Health Survey - Maternal Mortality Data                                                                             | Sibling History    |                                        | 1994      | 15 - 59 years    | 4           |
| Brazil: Amazonas         | Brazil Demographic and Health Survey - Maternal Mortality Data                                                                             | Sibling History    |                                        | 1996      | 50 - 54 years    | 2           |
| Brazil: Amazonas         | Brazil Mortality Information System (SIM)                                                                                                  | Vital Registration |                                        | 1980-2013 | All Ages         | 324158      |
| Brazil: Bahia            | Brazil Demographic and Health Survey - Maternal Mortality Data                                                                             | Sibling History    |                                        | 1982-1984 | 20 - 24 years    | 3           |
| Brazil: Bahia            | Brazil Demographic and Health Survey - Maternal Mortality Data                                                                             | Sibling History    |                                        | 1986-1995 | 35 - 44 years    | 2           |
| Brazil: Bahia            | Brazil Mortality Information System (SIM)                                                                                                  | Vital Registration |                                        | 1980-2013 | All Ages         | 2009973     |
| Brazil: Ceará            | Brazil Demographic and Health Survey - Maternal Mortality Data                                                                             | Sibling History    |                                        | 1983-1984 | 25 - 54 years    | 2           |
| Brazil: Ceará            | Brazil Demographic and Health Survey - Maternal Mortality Data                                                                             | Sibling History    |                                        | 1986      | 15 - 59 years    | 2           |
| Brazil: Ceará            | Brazil Demographic and Health Survey - Maternal Mortality Data                                                                             | Sibling History    |                                        | 1990      | 30 - 54 years    | 3           |
| Brazil: Ceará            | Brazil Demographic and Health Survey - Maternal Mortality Data                                                                             | Sibling History    |                                        | 1992-1996 | 20 - 29 years    | 3           |
| Brazil: Ceará            | A study of infant mortality and causes of death in a rural north-east Brazilian community                                                  | Verbal Autopsy     | Trairi county Ceara state [rural]      | 1985      | birth - 364 days | 266         |
| Brazil: Ceará            | Vigilancia de obitos infantis em sistemas locais de saude: avaliacao da autopsia verbal e das informacoes de agentes de saude              | Verbal Autopsy     | Quixada Ceara Icapui Ceara Jucas Ceara | 1993      | birth - 27 days  | 201         |
| Brazil: Ceará            | Surveillance of infant deaths in local health systems: assessment of verbal autopsy reports and of information gathered from health agents | Verbal Autopsy     | Quixada Icapui Jucas [urban]           | 1993      | birth - 364 days | 215         |
| Brazil: Ceará            | Brazil Mortality Information System (SIM)                                                                                                  | Vital Registration |                                        | 1980-2013 | All Ages         | 1093812     |
| Brazil: Distrito Federal | Brazil Demographic and Health Survey - Maternal Mortality Data                                                                             | Sibling History    |                                        | 1982      | 20 - 24 years    | 2           |
| Brazil: Distrito Federal | Brazil Demographic and Health Survey - Maternal Mortality Data                                                                             | Sibling History    |                                        | 1985      | 30 - 49 years    | 3           |
| Brazil: Distrito Federal | Brazil Demographic and Health Survey - Maternal Mortality Data                                                                             | Sibling History    |                                        | 1990-1991 | 35 - 39 years    | 1           |

**Appendix Table 6: Causes of death data source list by geography, source type, and study site, with years, age range, and sample size, excluding sources on lower respiratory infection and diarrhoea etiologies**

| Location                   | Source name                                                                                                | Source type        | Site | Years                 | Ages            | Sample size |
|----------------------------|------------------------------------------------------------------------------------------------------------|--------------------|------|-----------------------|-----------------|-------------|
| Brazil: Distrito Federal   | Brazil Demographic and Health Survey - Maternal Mortality Data                                             | Sibling History    |      | 1993-1994             | 30 - 34 years   | 1           |
| Brazil: Distrito Federal   | Brazil Mortality Information System (SIM)                                                                  | Vital Registration |      | 1980-2013             | All Ages        | 273179      |
| Brazil: Espírito Santo     | Brazil Demographic and Health Survey - Maternal Mortality Data                                             | Sibling History    |      | 1983, 1993            | 25 - 29 years   | 2           |
| Brazil: Espírito Santo     | Brazil Demographic and Health Survey - Maternal Mortality Data                                             | Sibling History    |      | 1991                  | 35 - 39 years   | 2           |
| Brazil: Espírito Santo     | Brazil Demographic and Health Survey - Maternal Mortality Data                                             | Sibling History    |      | 1995-1996             | 30 - 34 years   | 1           |
| Brazil: Espírito Santo     | Brazil Mortality Information System (SIM)                                                                  | Vital Registration |      | 1980-2013             | All Ages        | 569271      |
| Brazil: Goiás              | Brazil Demographic and Health Survey - Maternal Mortality Data                                             | Sibling History    |      | 1983, 1994-1995       | 45 - 49 years   | 3           |
| Brazil: Goiás              | Brazil Demographic and Health Survey - Maternal Mortality Data                                             | Sibling History    |      | 1985                  | 35 - 39 years   | 1           |
| Brazil: Goiás              | Brazil Demographic and Health Survey - Maternal Mortality Data                                             | Sibling History    |      | 1987                  | 20 - 29 years   | 2           |
| Brazil: Goiás              | Brazil Demographic and Health Survey - Maternal Mortality Data                                             | Sibling History    |      | 1990                  | 50 - 54 years   | 1           |
| Brazil: Goiás              | Brazil Demographic and Health Survey - Maternal Mortality Data                                             | Sibling History    |      | 1992                  | 30 - 59 years   | 3           |
| Brazil: Goiás              | Brazil Mortality Information System (SIM)                                                                  | Vital Registration |      | 1980-2013             | All Ages        | 818954      |
| Brazil: Maranhão           | Brazil Demographic and Health Survey - Maternal Mortality Data                                             | Sibling History    |      | 1982-1984             | 20 - 59 years   | 2           |
| Brazil: Maranhão           | Brazil Demographic and Health Survey - Maternal Mortality Data                                             | Sibling History    |      | 1986                  | 20 - 24 years   | 2           |
| Brazil: Maranhão           | Brazil Demographic and Health Survey - Maternal Mortality Data                                             | Sibling History    |      | 1990-1995             | 20 - 34 years   | 3           |
| Brazil: Maranhão           | Morbimortalidade infantil por diarreia aguda em área metropolitana da região Nordeste do Brasil, 1986-1989 | Verbal Autopsy     |      | 1986, 1989            | birth - 4 years | 124         |
| Brazil: Maranhão           | Brazil Mortality Information System (SIM)                                                                  | Vital Registration |      | 1980-2013             | All Ages        | 598743      |
| Brazil: Mato Grosso        | Brazil Demographic and Health Survey - Maternal Mortality Data                                             | Sibling History    |      | 1982                  | 15 - 34 years   | 3           |
| Brazil: Mato Grosso        | Brazil Demographic and Health Survey - Maternal Mortality Data                                             | Sibling History    |      | 1984-1985             | 30 - 34 years   | 2           |
| Brazil: Mato Grosso        | Brazil Demographic and Health Survey - Maternal Mortality Data                                             | Sibling History    |      | 1989-1990             | 25 - 29 years   | 1           |
| Brazil: Mato Grosso        | Brazil Demographic and Health Survey - Maternal Mortality Data                                             | Sibling History    |      | 1992-1996             | 25 - 54 years   | 2           |
| Brazil: Mato Grosso        | Brazil Mortality Information System (SIM)                                                                  | Vital Registration |      | 1980-2013             | All Ages        | 328303      |
| Brazil: Mato Grosso do Sul | Brazil Demographic and Health Survey - Maternal Mortality Data                                             | Sibling History    |      | 1982, 1986, 1988-1989 | 20 - 24 years   | 3           |
| Brazil: Mato Grosso do Sul | Brazil Demographic and Health Survey - Maternal Mortality Data                                             | Sibling History    |      | 1991-1992             | 25 - 29 years   | 1           |
| Brazil: Mato Grosso do Sul | Brazil Demographic and Health Survey - Maternal Mortality Data                                             | Sibling History    |      | 1995                  | 45 - 49 years   | 1           |
| Brazil: Mato Grosso do Sul | Brazil Mortality Information System (SIM)                                                                  | Vital Registration |      | 1980-2013             | All Ages        | 363422      |
| Brazil: Minas Gerais       | Brazil Demographic and Health Survey - Maternal Mortality Data                                             | Sibling History    |      | 1982                  | 15 - 44 years   | 6           |
| Brazil: Minas Gerais       | Brazil Demographic and Health Survey - Maternal Mortality Data                                             | Sibling History    |      | 1984-1995             | 15 - 34 years   | 5           |
| Brazil: Minas Gerais       | Brazil Mortality Information System (SIM)                                                                  | Vital Registration |      | 1980-2013             | All Ages        | 3436489     |
| Brazil: Pará               | Brazil Demographic and Health Survey - Maternal Mortality Data                                             | Sibling History    |      | 1987-1988, 1991       | 20 - 24 years   | 3           |



**Appendix Table 6: Causes of death data source list by geography, source type, and study site, with years, age range, and sample size, excluding sources on lower respiratory infection and diarrhoea etiologies**

| Location                    | Source name                                                    | Source type        | Site | Years            | Ages          | Sample size |
|-----------------------------|----------------------------------------------------------------|--------------------|------|------------------|---------------|-------------|
| Brazil: Pará                | Brazil Demographic and Health Survey - Maternal Mortality Data | Sibling History    |      | 1993-1995        | 50 - 54 years | 1           |
| Brazil: Pará                | Brazil Mortality Information System (SIM)                      | Vital Registration |      | 1980-2013        | All Ages      | 749632      |
| Brazil: Paraíba             | Brazil Demographic and Health Survey - Maternal Mortality Data | Sibling History    |      | 1984, 1989       | 40 - 44 years | 2           |
| Brazil: Paraíba             | Brazil Demographic and Health Survey - Maternal Mortality Data | Sibling History    |      | 1992             | 20 - 39 years | 2           |
| Brazil: Paraíba             | Brazil Demographic and Health Survey - Maternal Mortality Data | Sibling History    |      | 1994-1995        | 20 - 59 years | 5           |
| Brazil: Paraíba             | Brazil Mortality Information System (SIM)                      | Vital Registration |      | 1980-2013        | All Ages      | 705399      |
| Brazil: Paraná              | Brazil Demographic and Health Survey - Maternal Mortality Data | Sibling History    |      | 1983-1986        | 30 - 34 years | 1           |
| Brazil: Paraná              | Brazil Demographic and Health Survey - Maternal Mortality Data | Sibling History    |      | 1988             | 45 - 49 years | 1           |
| Brazil: Paraná              | Brazil Demographic and Health Survey - Maternal Mortality Data | Sibling History    |      | 1990             | 25 - 49 years | 2           |
| Brazil: Paraná              | Brazil Demographic and Health Survey - Maternal Mortality Data | Sibling History    |      | 1992-1995        | 40 - 49 years | 2           |
| Brazil: Paraná              | Brazil Mortality Information System (SIM)                      | Vital Registration |      | 1980-2013        | All Ages      | 1852297     |
| Brazil: Pernambuco          | Brazil Demographic and Health Survey - Maternal Mortality Data | Sibling History    |      | 1982             | 15 - 19 years | 1           |
| Brazil: Pernambuco          | Brazil Demographic and Health Survey - Maternal Mortality Data | Sibling History    |      | 1984             | 15 - 39 years | 4           |
| Brazil: Pernambuco          | Brazil Demographic and Health Survey - Maternal Mortality Data | Sibling History    |      | 1986-1996        | 20 - 29 years | 2           |
| Brazil: Pernambuco          | Brazil Mortality Information System (SIM)                      | Vital Registration |      | 1980-2013        | All Ages      | 1813364     |
| Brazil: Piauí               | Brazil Demographic and Health Survey - Maternal Mortality Data | Sibling History    |      | 1982, 1984, 1987 | 25 - 29 years | 4           |
| Brazil: Piauí               | Brazil Demographic and Health Survey - Maternal Mortality Data | Sibling History    |      | 1993-1995        | 30 - 34 years | 1           |
| Brazil: Piauí               | Brazil Mortality Information System (SIM)                      | Vital Registration |      | 1980-2013        | All Ages      | 362009      |
| Brazil: Rio de Janeiro      | Brazil Demographic and Health Survey - Maternal Mortality Data | Sibling History    |      | 1982             | 25 - 29 years | 1           |
| Brazil: Rio de Janeiro      | Brazil Demographic and Health Survey - Maternal Mortality Data | Sibling History    |      | 1984             | 25 - 34 years | 2           |
| Brazil: Rio de Janeiro      | Brazil Demographic and Health Survey - Maternal Mortality Data | Sibling History    |      | 1987-1988        | 25 - 54 years | 2           |
| Brazil: Rio de Janeiro      | Brazil Demographic and Health Survey - Maternal Mortality Data | Sibling History    |      | 1990             | 25 - 59 years | 4           |
| Brazil: Rio de Janeiro      | Brazil Demographic and Health Survey - Maternal Mortality Data | Sibling History    |      | 1992-1995        | 35 - 59 years | 4           |
| Brazil: Rio de Janeiro      | Brazil Mortality Information System (SIM)                      | Vital Registration |      | 1980-2013        | All Ages      | 3793988     |
| Brazil: Rio Grande do Norte | Brazil Demographic and Health Survey - Maternal Mortality Data | Sibling History    |      | 1982-1984        | 25 - 34 years | 2           |
| Brazil: Rio Grande do Norte | Brazil Demographic and Health Survey - Maternal Mortality Data | Sibling History    |      | 1988-1989        | 35 - 39 years | 2           |
| Brazil: Rio Grande do Norte | Brazil Demographic and Health Survey - Maternal Mortality Data | Sibling History    |      | 1994             | 25 - 54 years | 3           |
| Brazil: Rio Grande do Norte | Brazil Mortality Information System (SIM)                      | Vital Registration |      | 1980-2013        | All Ages      | 426252      |
| Brazil: Rio Grande do Sul   | Brazil Demographic and Health Survey - Maternal Mortality Data | Sibling History    |      | 1982-1989        | 45 - 49 years | 1           |
| Brazil: Rio Grande do Sul   | Brazil Demographic and Health Survey - Maternal Mortality Data | Sibling History    |      | 1991-1996        | 15 - 44 years | 5           |

**Appendix Table 6: Causes of death data source list by geography, source type, and study site, with years, age range, and sample size, excluding sources on lower respiratory infection and diarrhoea etiologies**

| Location                  | Source name                                                                                                                               | Source type        | Site                                                 | Years                | Ages             | Sample size |
|---------------------------|-------------------------------------------------------------------------------------------------------------------------------------------|--------------------|------------------------------------------------------|----------------------|------------------|-------------|
| Brazil: Rio Grande do Sul | Early childhood mortality in a Brazilian cohort: the roles of birthweight and socioeconomic status                                        | Verbal Autopsy     | Pelotas [urban]                                      | 1984                 | 1 - 4 years      | 29          |
| Brazil: Rio Grande do Sul | Evidence for protection by breast-feeding against infant deaths from infectious diseases in Brazil                                        | Verbal Autopsy     | Porto Alegre and Pelota [urban]                      | 1984                 | birth - 364 days | 357         |
| Brazil: Rio Grande do Sul | International differences in clinical patterns of diarrhoeal deaths: a comparison of children from Brazil, Senegal, Bangladesh, and India | Verbal Autopsy     | Porto Alegre Pelotas Rio Grande do Sul state [mixed] | 1985                 | birth - 4 years  | 1892        |
| Brazil: Rio Grande do Sul | Infant mortality in two population-based cohorts in southern Brazil: trends and differentials                                             | Verbal Autopsy     | Pelotas [urban]                                      | 1993                 | birth - 364 days | 111         |
| Brazil: Rio Grande do Sul | Brazil Mortality Information System (SIM)                                                                                                 | Vital Registration |                                                      | 1980-2013            | All Ages         | 2218443     |
| Brazil: Rondônia          | Brazil Demographic and Health Survey - Maternal Mortality Data                                                                            | Sibling History    |                                                      | 1986                 | 15 - 19 years    | 1           |
| Brazil: Rondônia          | Brazil Demographic and Health Survey - Maternal Mortality Data                                                                            | Sibling History    |                                                      | 1990-1993            | 40 - 44 years    | 1           |
| Brazil: Rondônia          | Brazil Demographic and Health Survey - Maternal Mortality Data                                                                            | Sibling History    |                                                      | 1995                 | 50 - 54 years    | 1           |
| Brazil: Rondônia          | Brazil Mortality Information System (SIM)                                                                                                 | Vital Registration |                                                      | 1980-2013            | All Ages         | 185131      |
| Brazil: Roraima           | Brazil Demographic and Health Survey - Maternal Mortality Data                                                                            | Sibling History    |                                                      | 1985                 | 20 - 39 years    | 2           |
| Brazil: Roraima           | Brazil Mortality Information System (SIM)                                                                                                 | Vital Registration |                                                      | 1980-2013            | All Ages         | 36643       |
| Brazil: Santa Catarina    | Brazil Demographic and Health Survey - Maternal Mortality Data                                                                            | Sibling History    |                                                      | 1982                 | 25 - 29 years    | 1           |
| Brazil: Santa Catarina    | Brazil Demographic and Health Survey - Maternal Mortality Data                                                                            | Sibling History    |                                                      | 1986                 | 15 - 19 years    | 1           |
| Brazil: Santa Catarina    | Brazil Demographic and Health Survey - Maternal Mortality Data                                                                            | Sibling History    |                                                      | 1995                 | 20 - 59 years    | 2           |
| Brazil: Santa Catarina    | Brazil Mortality Information System (SIM)                                                                                                 | Vital Registration |                                                      | 1980-2013            | All Ages         | 911317      |
| Brazil: São Paulo         | Brazil Demographic and Health Survey - Maternal Mortality Data                                                                            | Sibling History    |                                                      | 1982-1996            | 30 - 34 years    | 1           |
| Brazil: São Paulo         | Brazil Mortality Information System (SIM)                                                                                                 | Vital Registration |                                                      | 1980-2013            | All Ages         | 7576675     |
| Brazil: Sergipe           | Brazil Demographic and Health Survey - Maternal Mortality Data                                                                            | Sibling History    |                                                      | 1993                 | 45 - 49 years    | 1           |
| Brazil: Sergipe           | Brazil Mortality Information System (SIM)                                                                                                 | Vital Registration |                                                      | 1980-2013            | All Ages         | 306865      |
| Brazil: Tocantins         | Brazil Demographic and Health Survey - Maternal Mortality Data                                                                            | Sibling History    |                                                      | 1989                 | 30 - 34 years    | 1           |
| Brazil: Tocantins         | Brazil Demographic and Health Survey - Maternal Mortality Data                                                                            | Sibling History    |                                                      | 1991                 | 35 - 39 years    | 1           |
| Brazil: Tocantins         | Brazil Demographic and Health Survey - Maternal Mortality Data                                                                            | Sibling History    |                                                      | 1995                 | 40 - 44 years    | 1           |
| Brazil: Tocantins         | Brazil Mortality Information System (SIM)                                                                                                 | Vital Registration |                                                      | 1990-2013            | All Ages         | 110064      |
| Paraguay                  | United Nations Surveys on Crime Trends and the Operations of Criminal Justice Systems 1970-2006                                           | Police Records     |                                                      | 1992-1993            | All Ages         | Death Rate  |
| Paraguay                  | United Nations Office on Drugs and Crime Global Study on Homicide 2011                                                                    | Police Records     | Paraguay PAHO                                        | 1995-2007            | All Ages         | Death Rate  |
| Paraguay                  | United Nations Office on Drugs and Crime Global Study on Homicide 2011                                                                    | Police Records     | Paraguay OAS                                         | 2004-2007, 2009-2010 | All Ages         | Death Rate  |
| Paraguay                  | Global Status Report on Road Safety 2009                                                                                                  | Police Records     |                                                      | 2007                 | All Ages         | Death Rate  |
| Paraguay                  | Reproductive Health Survey (RHS)                                                                                                          | Sibling history    |                                                      | 1980-1994            | 15 - 49 years    | 0           |
| Paraguay                  | World Health Survey (WHS)                                                                                                                 | Survey/Census      |                                                      | 1997                 | All Ages         | 94          |
| Paraguay                  | Paraguay Population and Housing Census 2002                                                                                               | Survey/Census      |                                                      | 2001-2002            | 15 - 49 years    | 5750        |
| Paraguay                  | Paraguay Population and Housing Census 2002                                                                                               | Survey/Census      | rural area                                           | 2002                 | All Ages         | 1292        |

**Appendix Table 6: Causes of death data source list by geography, source type, and study site, with years, age range, and sample size, excluding sources on lower respiratory infection and diarrhoea etiologies**

| Location    | Source name                                                                                                             | Source type        | Site                                                                        | Years                            | Ages            | Sample size |
|-------------|-------------------------------------------------------------------------------------------------------------------------|--------------------|-----------------------------------------------------------------------------|----------------------------------|-----------------|-------------|
| Paraguay    | Paraguay Population and Housing Census 2002                                                                             | Survey/Census      | urban area                                                                  | 2002                             | All Ages        | 1927        |
| Paraguay    | WHO Mortality Database                                                                                                  | Vital Registration |                                                                             | 1980-1991, 1994-2013             | All Ages        | 578352      |
| Afghanistan | Special Demographic and Health Survey (DHS)                                                                             | Sibling History    |                                                                             | 1996-2010                        | 15 - 54 years   | 708         |
| Afghanistan | Where giving birth is a forecast of death: maternal mortality in four districts of Afghanistan, 1999-2002               | Verbal Autopsy     | Alisheng district Laghman province [periurban]                              | 2000                             | 15 - 49 years   | 52          |
| Afghanistan | Where giving birth is a forecast of death: maternal mortality in four districts of Afghanistan, 1999-2002               | Verbal Autopsy     | Kabul City Kabul province [urban]                                           | 2000                             | 15 - 49 years   | 122         |
| Afghanistan | Where giving birth is a forecast of death: maternal mortality in four districts of Afghanistan, 1999-2002               | Verbal Autopsy     | Maywand Kandahar province [rural]                                           | 2000                             | 15 - 49 years   | 62          |
| Afghanistan | Where giving birth is a forecast of death: maternal mortality in four districts of Afghanistan, 1999-2002               | Verbal Autopsy     | Ragh Badakshan Province [rural]                                             | 2000                             | 15 - 49 years   | 121         |
| Afghanistan | Afghanistan - Badghis Nutrition and Health Survey 2002                                                                  | Verbal Autopsy     | Badghis province [rural]                                                    | 2001                             | All Ages        | 79          |
| Afghanistan | Afghanistan Centers for Disease Control and Prevention Country Report 2003                                              | Verbal Autopsy     |                                                                             | 2002                             | birth - 4 years | 1039        |
| Afghanistan | Special Demographic and Health Survey (DHS)                                                                             | Verbal Autopsy     |                                                                             | 2008                             | All Ages        | 3139        |
| Algeria     | United Nations Office on Drugs and Crime Global Study on Homicide 2011                                                  | Police Records     | Algeria CTS                                                                 | 2003-2007                        | All Ages        | Death Rate  |
| Algeria     | Algeria - Study of Causes of Death, TAHINA 2002                                                                         | Surveillance       |                                                                             | 2002                             | All Ages        | 5879        |
| Algeria     | Algeria National Maternal Mortality Survey 1999                                                                         | Survey/Census      |                                                                             | 1999                             | 15 - 49 years   | 7757        |
| Algeria     | Hospital Mortality Data 2002-2007                                                                                       | Vital Registration |                                                                             | 2005-2006                        | All Ages        | 83052       |
| Bahrain     | United Nations Surveys on Crime Trends and the Operations of Criminal Justice Systems 1970-2006                         | Police Records     |                                                                             | 1980                             | All Ages        | Death Rate  |
| Bahrain     | United Nations Office on Drugs and Crime Global Study on Homicide 2011                                                  | Police Records     | Bahrain WHO-MDB                                                             | 1997                             | All Ages        | Death Rate  |
| Bahrain     | Global Status Report on Road Safety 2009                                                                                | Police Records     |                                                                             | 2007                             | All Ages        | Death Rate  |
| Bahrain     | Bahrain Vital Registration - Deaths 1986                                                                                | Vital Registration |                                                                             | 1986                             | All Ages        | 4189        |
| Bahrain     | WHO Mortality Database                                                                                                  | Vital Registration |                                                                             | 1998, 2000-2013                  | All Ages        | 37782       |
| Egypt       | United Nations Surveys on Crime Trends and the Operations of Criminal Justice Systems 1970-2006                         | Police Records     |                                                                             | 1982-1994                        | All Ages        | Death Rate  |
| Egypt       | United Nations Office on Drugs and Crime Global Study on Homicide 2011                                                  | Police Records     | Egypt CTS                                                                   | 2009                             | All Ages        | Death Rate  |
| Egypt       | Egypt National Maternal Mortality Surveillance System 2004-2006                                                         | Surveillance       |                                                                             | 2004, 2006                       | 15 - 49 years   | 43845       |
| Egypt       | A comparison of two cause-of-death classification systems for deaths among women of reproductive age in Menoufia, Egypt | Verbal Autopsy     | Menoufia                                                                    | 1981                             | 15 - 49 years   | 2005        |
| Egypt       | Maternal mortality in Giza, Egypt: magnitude, causes, and prevention                                                    | Verbal Autopsy     | Giza governorate                                                            | 1985                             | 15 - 49 years   | 841         |
| Egypt       | Diarrhoeal Disease, Oral Rehydration, and Childhood Mortality in Rural Egypt                                            | Verbal Autopsy     | 12 villages in Menoufia Governorate [rural]                                 | 1990                             | birth - 4 years | 95          |
| Egypt       | National maternal mortality ratio in Egypt halved between 1992-93 and 2000                                              | Verbal Autopsy     | 1992-3 survey included 21 governorates. 2000 survey covered 27 governorates | 1992, 2000                       | 15 - 49 years   | 15845       |
| Egypt       | Indices and sociodemographic determinants of childhood mortality in rural Upper Egypt                                   | Verbal Autopsy     | 6 sites in Upper Egypt Beni Suef [rural]                                    | 1994                             | birth - 4 years | 199         |
| Egypt       | WHO Mortality Database                                                                                                  | Vital Registration |                                                                             | 1980, 1987, 1991-1992, 2000-2013 | All Ages        | 7991848     |
| Iran        | United Nations Office on Drugs and Crime Global Study on Homicide 2011                                                  | Police Records     | Iran NSO                                                                    | 2009                             | All Ages        | Death Rate  |
| Iran        | Iran Maternal Mortality Report 2012-2013                                                                                | Surveillance       |                                                                             | 2002-2012                        | 15 - 49 years   | MMR         |

**Appendix Table 6: Causes of death data source list by geography, source type, and study site, with years, age range, and sample size, excluding sources on lower respiratory infection and diarrhoea etiologies**

| Location | Source name                                                                                                                                          | Source type        | Site                                           | Years                           | Ages             | Sample size |
|----------|------------------------------------------------------------------------------------------------------------------------------------------------------|--------------------|------------------------------------------------|---------------------------------|------------------|-------------|
| Iran     | Iran - National Estimates for Maternal Mortality: An Analysis Based on Reproductive Age Mortality Study (RAMOS) in Iran                              | Verbal Autopsy     | national                                       | 1996                            | 15 - 49 years    | 8363        |
| Iran     | An Epidemiological Study on Infant Mortality and Factors Affecting it in Rural Areas of Birjand, Iran                                                | Verbal Autopsy     | Birjand [rural]                                | 2004                            | birth - 364 days | 156         |
| Iran     | Opium Use and Risk of Mortality from Digestive Diseases: A Prospective Cohort Study                                                                  | Verbal Autopsy     | Northeastern Iran []                           | 2006                            | 40 - 44 years    | 3110        |
| Iran     | Gastroesophageal Reflux Disease and overall and Cause-specific Mortality: A Prospective Study of 50000 Individuals                                   | Verbal Autopsy     | Golestan provinceGolestan Cohort Study [rural] | 2008                            | 40 - 44 years    | 3107        |
| Iran     | WHO Mortality Database                                                                                                                               | Vital Registration |                                                | 1980-1985, 1987                 | All Ages         | 519197      |
| Iran     | Iran Death Registration System                                                                                                                       | Vital Registration |                                                | 1996-2001, 2007-2011            | All Ages         | 2200688     |
| Iran     | Iran Vital Statistics - Deaths 2000-2006                                                                                                             | Vital Registration |                                                | 2002-2006                       | All Ages         | 1344247     |
| Iraq     | United Nations Surveys on Crime Trends and the Operations of Criminal Justice Systems 1970-2006                                                      | Police Records     |                                                | 1990-1994                       | All Ages         | Death Rate  |
| Iraq     | Iraq Child and Maternal Mortality Survey 1999                                                                                                        | Survey/Census      |                                                | 1992, 1997                      | 15 - 49 years    | 1377        |
| Iraq     | WHO Mortality Database                                                                                                                               | Vital Registration |                                                | 2008                            | All Ages         | 106245      |
| Jordan   | United Nations Surveys on Crime Trends and the Operations of Criminal Justice Systems 1970-2006                                                      | Police Records     |                                                | 1980-1986, 1990-1994            | All Ages         | Death Rate  |
| Jordan   | Jordan Demographic and Health Survey - Maternal Mortality Data                                                                                       | Sibling History    |                                                | 1983-1997                       | 15 - 44 years    | 24          |
| Jordan   | Mortality and causes of death in Jordan 1995-96: assessment by verbal autopsy                                                                        | Verbal Autopsy     | national 100 clusters                          | 1995                            | birth - 79 years | 947         |
| Jordan   | Jordan National Maternal Mortality Study 2008                                                                                                        | Verbal Autopsy     | nationwide                                     | 2007                            | 15 - 49 years    | 1406        |
| Jordan   | Jordan Vital Registration - Deaths 2004-2006                                                                                                         | Vital Registration |                                                | 2004-2006                       | All Ages         | 53078       |
| Jordan   | WHO Mortality Database                                                                                                                               | Vital Registration |                                                | 2008-2011                       | All Ages         | 61753       |
| Kuwait   | United Nations Surveys on Crime Trends and the Operations of Criminal Justice Systems 1970-2006                                                      | Police Records     |                                                | 1980-1983, 1986-1989, 1992-1994 | All Ages         | Death Rate  |
| Kuwait   | United Nations Office on Drugs and Crime Global Study on Homicide 2011                                                                               | Police Records     | Kuwait WHO-MDB                                 | 1995-2002                       | All Ages         | Death Rate  |
| Kuwait   | United Nations Office on Drugs and Crime Global Study on Homicide 2011                                                                               | Police Records     | Kuwait CTS                                     | 2004-2007, 2009                 | All Ages         | Death Rate  |
| Kuwait   | WHO Mortality Database                                                                                                                               | Vital Registration |                                                | 1980-1987, 1993-2013            | All Ages         | 135797      |
| Lebanon  | United Nations Surveys on Crime Trends and the Operations of Criminal Justice Systems 1970-2006                                                      | Police Records     |                                                | 1986-1988, 1993-1994            | All Ages         | Death Rate  |
| Lebanon  | United Nations Office on Drugs and Crime Global Study on Homicide 2011                                                                               | Police Records     | Lebanon National police                        | 2004-2007, 2009-2010            | All Ages         | Death Rate  |
| Lebanon  | Lebanon Reproductive Age Mortality Survey 2009                                                                                                       | Surveillance       |                                                | 2008                            | 15 - 49 years    | MMR         |
| Lebanon  | Non-communicable disease mortality rates using the verbal autopsy in a cohort of middle aged and older populations in Beirut during wartime, 1983-93 | Verbal Autopsy     | Beirut [urban]                                 | 1988                            | 50 years +       | 416         |
| Lebanon  | Facility-based audit of maternal mortality in Lebanon: A feasibility study                                                                           | Verbal Autopsy     | Beirut                                         | 2000                            | 15 - 49 years    | 279         |
| Libya    | United Nations Office on Drugs and Crime Global Study on Homicide 2011                                                                               | Police Records     | Libya Interpol                                 | 2003                            | All Ages         | Death Rate  |
| Libya    | Libya Vital Statistics                                                                                                                               | Vital Registration |                                                | 2006-2008                       | All Ages         | 62293       |
| Morocco  | United Nations Surveys on Crime Trends and the Operations of Criminal Justice Systems 1970-2006                                                      | Police Records     |                                                | 1980, 1990-1994                 | All Ages         | Death Rate  |
| Morocco  | United Nations Office on Drugs and Crime Global Study on Homicide 2011                                                                               | Police Records     | Morocco CTS                                    | 1999-2004, 2006-2007, 2009-2010 | All Ages         | Death Rate  |
| Morocco  | Morocco Demographic and Health Survey - Maternal Mortality Data                                                                                      | Sibling History    |                                                | 1980-2003                       | 15 - 54 years    | 319         |

**Appendix Table 6: Causes of death data source list by geography, source type, and study site, with years, age range, and sample size, excluding sources on lower respiratory infection and diarrhoea etiologies**

| Location                       | Source name                                                                                     | Source type        | Site                            | Years                      | Ages            | Sample size |
|--------------------------------|-------------------------------------------------------------------------------------------------|--------------------|---------------------------------|----------------------------|-----------------|-------------|
| Morocco                        | Morocco Health in Figures                                                                       | Surveillance       |                                 | 2001-2004, 2008            | 15 - 49 years   | 12006       |
| Morocco                        | Implementing a maternal mortality surveillance system in Morocco - challenges and opportunities | Surveillance       |                                 | 2009                       | 15 - 49 years   | 3814        |
| Morocco                        | Pan Arab Project for Child Development (PAPCHILD)                                               | Survey/Census      |                                 | 1992, 1997                 | 15 - 49 years   | 3883        |
| Morocco                        | World Health Survey (WHS)                                                                       | Survey/Census      |                                 | 1997                       | All Ages        | 11          |
| Morocco                        | Morocco National Survey on Causes and Circumstances of Infant and Child Deaths 1988-1989        | Verbal Autopsy     | Morocco [mixed]                 | 1988                       | birth - 4 years | 382         |
| Morocco                        | Morocco Cause of Death Data 2005                                                                | Vital Registration |                                 | 2005                       | All Ages        | 135975      |
| Morocco                        | WHO Mortality Database                                                                          | Vital Registration |                                 | 2008-2012                  | All Ages        | 248409      |
| Palestine                      | United Nations Office on Drugs and Crime Global Study on Homicide 2011                          | Police Records     | Palestine CTS                   | 1997-1999, 2003-2005       | All Ages        | Death Rate  |
| Palestine                      | Palestine Report on Maternal Mortality 2008-2009                                                | Surveillance       | Gaza Strip                      | 2008-2009                  | 15 - 49 years   | MMR         |
| Palestine                      | Palestine Report on Maternal Mortality 2008-2009                                                | Surveillance       | West Bank                       | 2009                       | 15 - 49 years   | MMR         |
| Palestine                      | Maternal mortality among Palestinian women in the West Bank                                     | Verbal Autopsy     | West Bank - West Bank districts | 2000                       | 15 - 49 years   | 431         |
| Palestine                      | Palestine - West Bank Vital Registration - Deaths 1997                                          | Vital Registration | West Bank                       | 1997                       | All Ages        | 4918        |
| Palestine                      | Palestine - West Bank Vital Registration - Deaths 1998                                          | Vital Registration | West Bank                       | 1998                       | All Ages        | 4495        |
| Palestine                      | Palestine - West Bank Vital Registration - Deaths 1999                                          | Vital Registration | West Bank                       | 1999                       | All Ages        | 5181        |
| Palestine                      | Palestine - West Bank Vital Registration - Deaths 2000                                          | Vital Registration | West Bank                       | 2000                       | All Ages        | 5368        |
| Palestine                      | Palestine - West Bank Vital Registration - Deaths 2001                                          | Vital Registration | West Bank                       | 2001                       | All Ages        | 5172        |
| Palestine                      | Palestine - West Bank Vital Registration - Deaths 2002                                          | Vital Registration | West Bank                       | 2002                       | All Ages        | 5387        |
| Palestine                      | Palestine - West Bank Vital Registration - Deaths 2003                                          | Vital Registration | West Bank                       | 2003                       | All Ages        | 5663        |
| Palestine                      | Palestine - West Bank Vital Registration - Deaths 2004                                          | Vital Registration | West Bank                       | 2004                       | 1 year +        | 5902        |
| Palestine                      | Palestine - West Bank Vital Registration - Deaths 2007                                          | Vital Registration | West Bank                       | 2004-2007                  | 15 years +      | 25          |
| Palestine                      | Palestine - West Bank Vital Registration - Deaths 2008                                          | Vital Registration | West Bank                       | 2004-2007                  | 1 year +        | 745         |
| Palestine                      | Palestine - West Bank Vital Registration - Deaths 2009                                          | Vital Registration | West Bank                       | 2004-2007                  | 1 year +        | 190         |
| Palestine                      | Palestine - West Bank Vital Registration - Deaths 2005                                          | Vital Registration | West Bank                       | 2005                       | 1 year +        | 5813        |
| Palestine                      | WHO Mortality Database                                                                          | Vital Registration |                                 | 2008-2009, 2011-2014       | All Ages        | 40723       |
| Oman                           | United Nations Office on Drugs and Crime Global Study on Homicide 2011                          | Police Records     | Oman CTS                        | 2001-2002                  | All Ages        | Death Rate  |
| Oman                           | Hospital Mortality Data 2002-2007                                                               | Vital Registration |                                 | 2005-2007                  | All Ages        | 17186       |
| Oman                           | WHO Mortality Database                                                                          | Vital Registration |                                 | 2009-2010                  | All Ages        | 14098       |
| Qatar                          | United Nations Surveys on Crime Trends and the Operations of Criminal Justice Systems 1970-2006 | Police Records     |                                 | 1980-1994                  | All Ages        | Death Rate  |
| Qatar                          | United Nations Office on Drugs and Crime Global Study on Homicide 2011                          | Police Records     | Qatar CTS                       | 1998-2000, 2003, 2007      | All Ages        | Death Rate  |
| Qatar                          | Qatar Vital Statistics Annual Bulletin                                                          | Vital Registration |                                 | 1984-1985, 2000, 2002-2003 | All Ages        | 5138        |
| Qatar                          | WHO Mortality Database                                                                          | Vital Registration |                                 | 1995, 2001, 2004-2012      | All Ages        | 18539       |
| Saudi Arabia: 'Asir            | Saudi Arabia Vital Registration System                                                          | Vital Registration |                                 | 1999-2012                  | All Ages        | 41280       |
| Saudi Arabia: Bahah            | Saudi Arabia Vital Registration System                                                          | Vital Registration |                                 | 1999-2012                  | All Ages        | 10114       |
| Saudi Arabia: Eastern Province | Saudi Arabia Vital Registration System                                                          | Vital Registration |                                 | 1999-2012                  | All Ages        | 67064       |
| Saudi Arabia: Ha'il            | Saudi Arabia Vital Registration System                                                          | Vital Registration |                                 | 1999-2012                  | All Ages        | 14605       |
| Saudi Arabia: Jawf             | Saudi Arabia Vital Registration System                                                          | Vital Registration |                                 | 1999-2012                  | All Ages        | 9548        |
| Saudi Arabia: Jizan            | Saudi Arabia Vital Registration System                                                          | Vital Registration |                                 | 1999-2012                  | All Ages        | 24751       |
| Saudi Arabia: Madinah          | Saudi Arabia Vital Registration System                                                          | Vital Registration |                                 | 1999-2012                  | All Ages        | 51867       |

**Appendix Table 6: Causes of death data source list by geography, source type, and study site, with years, age range, and sample size, excluding sources on lower respiratory infection and diarrhoea etiologies**

| Location                       | Source name                                                                                               | Source type        | Site                                 | Years                              | Ages             | Sample size |
|--------------------------------|-----------------------------------------------------------------------------------------------------------|--------------------|--------------------------------------|------------------------------------|------------------|-------------|
| Saudi Arabia: Makkah           | Saudi Arabia Vital Registration System                                                                    | Vital Registration |                                      | 1999-2012                          | All Ages         | 160203      |
| Saudi Arabia: Najran           | Saudi Arabia Vital Registration System                                                                    | Vital Registration |                                      | 1999-2012                          | All Ages         | 7892        |
| Saudi Arabia: Northern Borders | Saudi Arabia Vital Registration System                                                                    | Vital Registration |                                      | 1999-2012                          | All Ages         | 6997        |
| Saudi Arabia: Qassim           | Saudi Arabia Vital Registration System                                                                    | Vital Registration |                                      | 1999-2012                          | All Ages         | 28133       |
| Saudi Arabia: Riyadh           | Saudi Arabia Vital Registration System                                                                    | Vital Registration |                                      | 1999-2000, 2002-2012               | All Ages         | 91554       |
| Saudi Arabia: Tabuk            | Saudi Arabia Vital Registration System                                                                    | Vital Registration |                                      | 1999-2012                          | All Ages         | 16010       |
| Sudan                          | United Nations Surveys on Crime Trends and the Operations of Criminal Justice Systems 1970-2006           | Police Records     |                                      | 1990-1994                          | All Ages         | Death Rate  |
| Sudan                          | Global Status Report on Road Safety 2009                                                                  | Police Records     |                                      | 2007                               | All Ages         | Death Rate  |
| Sudan                          | United Nations Office on Drugs and Crime Global Study on Homicide 2011                                    | Police Records     | Sudan CTS                            | 2007                               | All Ages         | Death Rate  |
| Sudan                          | Demographic and Health Survey (DHS)                                                                       | Sibling History    |                                      | 1980-1989                          | 15 - 44 years    | 49          |
| Sudan                          | Pan Arab Project for Family Health (PAPFAM)                                                               | Surveillance       |                                      | 2005                               | 15 - 49 years    | 13792       |
| Sudan                          | International Integrated Public Use Microdata Series (IPUMS)                                              | Survey/Census      |                                      | 2008                               | 15 - 54 years    | 1110        |
| Sudan                          | Sudan Population and Housing Census 2008                                                                  | Survey/Census      | Khartoum                             | 2008                               | All Ages         | 63032       |
| Sudan                          | Sudan Population and Housing Census 2008                                                                  | Survey/Census      | North Sudan                          | 2008                               | All Ages         | 446449      |
| Syria                          | United Nations Surveys on Crime Trends and the Operations of Criminal Justice Systems 1970-2006           | Police Records     |                                      | 1980-1994                          | All Ages         | Death Rate  |
| Syria                          | United Nations Office on Drugs and Crime Global Study on Homicide 2011                                    | Police Records     | Syria CTS                            | 2007                               | All Ages         | Death Rate  |
| Syria                          | Pan Arab Project for Family Health (PAPFAM)                                                               | Surveillance       |                                      | 1993, 1998                         | 15 - 49 years    | 823         |
| Syria                          | Causes of death among Syrian children using verbal autopsy                                                | Verbal Autopsy     | Syria (40000 households nationally)  | 1995                               | birth - 4 years  | 660         |
| Syria                          | Maternal mortality in Syria: causes, contributing factors and preventability                              | Verbal Autopsy     |                                      | 2003                               | 15 - 49 years    | 967         |
| Syria                          | WHO Mortality Database                                                                                    | Vital Registration |                                      | 1980, 1984-1985, 2010              | All Ages         | 204742      |
| Syria                          | Syria Vital Statistics - Deaths 2005-2007                                                                 | Vital Registration |                                      | 2005-2007                          | All Ages         | 170578      |
| Tunisia                        | United Nations Office on Drugs and Crime Global Study on Homicide 2011                                    | Police Records     | Tunisia CTS                          | 1998-2002                          | All Ages         | Death Rate  |
| Tunisia                        | Global Status Report on Road Safety 2009                                                                  | Police Records     |                                      | 2007                               | All Ages         | Death Rate  |
| Tunisia                        | Tunisia National Maternal Mortality Survey 2009-2010                                                      | Survey/Census      |                                      | 1993, 2000, 2002, 2004, 2006, 2008 | 15 - 49 years    | MMR         |
| Tunisia                        | World Health Survey (WHS)                                                                                 | Survey/Census      |                                      | 1997                               | All Ages         | 32          |
| Tunisia                        | Tunisia National Statistics on Medical Causes of Death 2006                                               | Vital Registration |                                      | 2006                               | All Ages         | 9646        |
| Tunisia                        | WHO Mortality Database                                                                                    | Vital Registration |                                      | 2009, 2013                         | All Ages         | 42737       |
| Turkey                         | Turkey Road Traffic Accident Statistics 2010                                                              | Police Records     |                                      | 2001-2010                          | All Ages         | Death Rate  |
| Turkey                         | Infant Mortality Rates in Narlidere District, Turkey (1999 to 2001): Trends in Rates and Risk Factors     | Verbal Autopsy     | Narlidere District Izmir             | 2000                               | birth - 364 days | 69          |
| Turkey                         | Prevalence of Asthma, Allergy, and Respiratory Symptoms in Hasancelebi/Hekimhan/Malatya in Eastern Turkey | Verbal Autopsy     | Hasancelebi Hekimhan Malatya [rural] | 2001                               | 20 years +       | 173         |
| Turkey                         | Turkey Verbal Autopsy Survey 2003                                                                         | Verbal Autopsy     |                                      | 2002                               | All Ages         | 1084        |
| Turkey                         | Identifying and verifying causes of death in Turkey: National verbal autopsy survey                       | Verbal Autopsy     | Turkey (12000 households)            | 2003                               | All Ages         | 1056        |
| Turkey                         | The Turkey national maternal mortality study                                                              | Verbal Autopsy     |                                      | 2005                               | 15 - 49 years    | 6887        |
| Turkey                         | The Turkey national maternal mortality study                                                              | Verbal Autopsy     | Turkey                               | 2005                               | 15 - 49 years    | 6876        |

**Appendix Table 6: Causes of death data source list by geography, source type, and study site, with years, age range, and sample size, excluding sources on lower respiratory infection and diarrhoea etiologies**

| Location             | Source name                                                                                                                               | Source type        | Site                                         | Years                      | Ages             | Sample size |
|----------------------|-------------------------------------------------------------------------------------------------------------------------------------------|--------------------|----------------------------------------------|----------------------------|------------------|-------------|
| Turkey               | Statistical Analysis of Death Causes (2005-2010) in Villages with High Arsenic Levels in Drinking Water Supplies of Simav Plain, Turkey   | Verbal Autopsy     | Simav Plain [rural]                          | 2011                       | All Ages         | 402         |
| Turkey               | WHO Mortality Database                                                                                                                    | Vital Registration |                                              | 1983-1984, 1987-2013       | All Ages         | 5627972     |
| United Arab Emirates | United Nations Surveys on Crime Trends and the Operations of Criminal Justice Systems 1970-2006                                           | Police Records     |                                              | 1980                       | All Ages         | Death Rate  |
| United Arab Emirates | United Nations Office on Drugs and Crime Global Study on Homicide 2011                                                                    | Police Records     | United Arab Emirates CTS                     | 2003-2006                  | All Ages         | Death Rate  |
| United Arab Emirates | United Arab Emirates Annual Statistical Report                                                                                            | Vital Registration |                                              | 2006-2007                  | All Ages         | 16274       |
| Yemen                | United Nations Office on Drugs and Crime Global Study on Homicide 2011                                                                    | Police Records     | Yemen NSO                                    | 2003-2007, 2009            | All Ages         | Death Rate  |
| Yemen                | Demographic and Health Survey (DHS)                                                                                                       | Sibling History    |                                              | 1992                       | 15 - 49 years    | 404         |
| Yemen                | Pan Arab Project for Family Health (PAPFAM)                                                                                               | Surveillance       |                                              | 2002                       | 15 - 49 years    | 2584        |
| Bangladesh           | United Nations Surveys on Crime Trends and the Operations of Criminal Justice Systems 1970-2006                                           | Police Records     |                                              | 1980-1986                  | All Ages         | Death Rate  |
| Bangladesh           | United Nations Office on Drugs and Crime Global Study on Homicide 2011                                                                    | Police Records     | Bangladesh National police                   | 2000, 2004-2007, 2009-2010 | All Ages         | Death Rate  |
| Bangladesh           | Global Status Report on Road Safety 2009                                                                                                  | Police Records     |                                              | 2006                       | All Ages         | Death Rate  |
| Bangladesh           | Bangladesh Demographic and Health Survey - Maternal Mortality Data                                                                        | Sibling History    |                                              | 1987-2001                  | 15 - 59 years    | 5089        |
| Bangladesh           | Maternal mortality in rural Bangladesh: the Tangail District                                                                              | Survey/Census      | Gopalpur and Bhuapur [rural]                 | 1982                       | 15 - 49 years    | 146         |
| Bangladesh           | Bangladesh Maternal Mortality and Health Service Survey 2010                                                                              | Survey/Census      |                                              | 2009                       | 15 - 49 years    | 816         |
| Bangladesh           | Demographic Surveillance System (DSS)                                                                                                     | Verbal Autopsy     |                                              | 1980-2012                  | 20 - 69 years    | 1146        |
| Bangladesh           | Maternal mortality in rural Bangladesh: the Jamalpur District                                                                             | Verbal Autopsy     | Dhaka - Jamalpur District                    | 1982                       | 15 - 44 years    | 126         |
| Bangladesh           | Neo-natal mortality patterns in rural Bangladesh                                                                                          | Verbal Autopsy     | Ghatail Upazila District of Tangail [rural]  | 1985                       | birth - 27 days  | 69          |
| Bangladesh           | The effect of maternal and child health and family planning services on mortality: Is prevention enough?                                  | Verbal Autopsy     | Chittagong - Matlab                          | 1986                       | 15 - 44 years    | 102         |
| Bangladesh           | International differences in clinical patterns of diarrhoeal deaths: a comparison of children from Brazil, Senegal, Bangladesh, and India | Verbal Autopsy     | Matlab [rural]                               | 1988                       | birth - 4 years  | 1567        |
| Bangladesh           | Levels, Trends and Causes of Mortality in Children Below 5 Years of Age in Bangladesh: Findings from a national survey                    | Verbal Autopsy     | Dhaka Khulna Rajshahi and Chittagong         | 1990                       | birth - 4 years  | 806         |
| Bangladesh           | A comparison of sisterhood information on causes of maternal death with the registration causes of maternal death in Matlab, Bangladesh   | Verbal Autopsy     | rural Chittagong - Matlab                    | 1991                       | 15 - 49 years    | 683         |
| Bangladesh           | Causes of childhood deaths in Bangladesh: an update                                                                                       | Verbal Autopsy     |                                              | 1991, 1994                 | birth - 4 years  | 1497        |
| Bangladesh           | Bangladesh Verbal Autopsy Study 2015                                                                                                      | Verbal Autopsy     | Bagerhat-Baintola (Rural)                    | 1992                       | 65 - 69 years    | 1           |
| Bangladesh           | Neonatal mortality in rural Bangladesh: an exploratory study                                                                              | Verbal Autopsy     | Dhaka Chittagong Rajshahi and Khulna [rural] | 1992                       | birth - 27 days  | 47          |
| Bangladesh           | Determinants of mortality among children in the urban slums of Dhaka city, Bangladesh                                                     | Verbal Autopsy     | Dhaka City [urban]                           | 1992                       | birth - 9 years  | 402         |
| Bangladesh           | Causes of childhood deaths in Bangladesh: results of a nationwide verbal autopsy study                                                    | Verbal Autopsy     | BDHS [mixed]                                 | 1993                       | birth - 4 years  | 823         |
| Bangladesh           | Exclusive breastfeeding reduces acute respiratory infection and diarrhea deaths among infants in Dhaka slums                              | Verbal Autopsy     | Dhaka slums [urban]                          | 1994                       | birth - 364 days | 178         |
| Bangladesh           | Bangladesh Verbal Autopsy Study 2015                                                                                                      | Verbal Autopsy     | Rajbari-Boalia (Rural)                       | 2000                       | 80 years +       | 1           |
| Bangladesh           | Demographic Surveillance System (DSS)                                                                                                     | Verbal Autopsy     | hsid                                         | 2000                       | All Ages         | 694         |

**Appendix Table 6: Causes of death data source list by geography, source type, and study site, with years, age range, and sample size, excluding sources on lower respiratory infection and diarrhoea etiologies**

| Location   | Source name                                                                                                                                               | Source type    | Site                                                                  | Years           | Ages            | Sample size |
|------------|-----------------------------------------------------------------------------------------------------------------------------------------------------------|----------------|-----------------------------------------------------------------------|-----------------|-----------------|-------------|
| Bangladesh | Elevated Manganese Concentrations in Drinking Water May Be Beneficial for Fetal Survival                                                                  | Verbal Autopsy | MatlabKorle-Bu Teaching Hospital Mortuary [rural]                     | 2002            | birth - 27 days | 33          |
| Bangladesh | Bangladesh Verbal Autopsy Study 2015                                                                                                                      | Verbal Autopsy | Madaripur-Khalia (Rural)                                              | 2003            | 65 - 69 years   | 1           |
| Bangladesh | Demographic and Health Survey (DHS)                                                                                                                       | Verbal Autopsy |                                                                       | 2004            | birth - 4 years | 604         |
| Bangladesh | Causes of early childhood deaths in urban Dhaka, Bangladesh                                                                                               | Verbal Autopsy | Dhaka City [urban]                                                    | 2004            | birth - 4 years | 914         |
| Bangladesh | Bangladesh Verbal Autopsy Study 2015                                                                                                                      | Verbal Autopsy | Narail-Kotakol (Rural)                                                | 2004            | 60 - 64 years   | 1           |
| Bangladesh | Effects of vitamin A or beta carotene supplementation on pregnancy-related mortality and infant mortality in rural Bangladesh: a cluster randomized trial | Verbal Autopsy | Rangpur [rural]                                                       | 2004            | birth - 27 days | 951         |
| Bangladesh | Beyond pregnancy--the neglected burden of mortality in young women of reproductive age in Bangladesh: a prospective cohort study                          | Verbal Autopsy | northwest rural BangladeshKorle-Bu Teaching Hospital Mortuary [rural] | 2004            | 15 - 44 years   | 1107        |
| Bangladesh | Bangladesh Verbal Autopsy Study 2015                                                                                                                      | Verbal Autopsy | Rajbari-Chandani (Rural)                                              | 2005-2006       | 80 years +      | 1           |
| Bangladesh | Bangladesh Verbal Autopsy Study 2015                                                                                                                      | Verbal Autopsy | Madaripur-Amgram (Rural)                                              | 2006            | 80 years +      | 2           |
| Bangladesh | Bangladesh - Dhaka Causes of Maternal, Neonatal and Child Deaths: An Exploratory Study of Dhaka's Slum Dwellers                                           | Verbal Autopsy | Dhaka slums [urban]                                                   | 2006, 2008      | birth - 4 years | 376         |
| Bangladesh | Verbal autopsy for neonatal mortality: a community-based study                                                                                            | Verbal Autopsy | Mallickbari and Hobirbari Valuaka Mymensingh rural [rural]            | 2007            | birth - 27 days | 54          |
| Bangladesh | Bangladesh Verbal Autopsy Study 2015                                                                                                                      | Verbal Autopsy | Pirojpur-Dirgha (Rural)                                               | 2007            | 45 - 49 years   | 1           |
| Bangladesh | Demographic Surveillance System (DSS)                                                                                                                     | Verbal Autopsy | Matlab HDSS                                                           | 2007-2010       | All Ages        | 6028        |
| Bangladesh | Causes of neonatal and maternal deaths in Dhaka slums: implications for service delivery                                                                  | Verbal Autopsy | Dhaka slums [urban]                                                   | 2008            | birth - 27 days | 260         |
| Bangladesh | Bangladesh Verbal Autopsy Study 2015                                                                                                                      | Verbal Autopsy | Rajbari-Boalia (Rural)                                                | 2008            | 40 - 44 years   | 1           |
| Bangladesh | Bangladesh Verbal Autopsy Study 2015                                                                                                                      | Verbal Autopsy | Habiganj-Adaaur (Rural)                                               | 2009            | 80 years +      | 2           |
| Bangladesh | Bangladesh Verbal Autopsy Study 2015                                                                                                                      | Verbal Autopsy | Joypurhat-Ayama Rasulpur (Rural)                                      | 2009            | 80 years +      | 1           |
| Bangladesh | Bangladesh Verbal Autopsy Study 2015                                                                                                                      | Verbal Autopsy | Netrokona-Sandikona (Rural)                                           | 2009            | 40 - 44 years   | 1           |
| Bangladesh | Bangladesh Verbal Autopsy Study 2015                                                                                                                      | Verbal Autopsy | Kurigram-Joymanirhat (Rural)                                          | 2009-2010       | 45 - 49 years   | 1           |
| Bangladesh | Bangladesh Verbal Autopsy Study 2015                                                                                                                      | Verbal Autopsy | Bogra-Majhira (Rural)                                                 | 2010            | 50 - 54 years   | 1           |
| Bangladesh | Bangladesh Verbal Autopsy Study 2015                                                                                                                      | Verbal Autopsy | Cox's Bazar-Kakara (Rural)                                            | 2010            | 80 years +      | 1           |
| Bangladesh | Bangladesh Verbal Autopsy Study 2015                                                                                                                      | Verbal Autopsy | Netrokona-Sunai (Rural)                                               | 2010            | 80 years +      | 1           |
| Bangladesh | Bangladesh Verbal Autopsy Study 2015                                                                                                                      | Verbal Autopsy | Rangpur-Darshan (Rural)                                               | 2010            | 80 years +      | 1           |
| Bangladesh | Bangladesh Verbal Autopsy Study 2015                                                                                                                      | Verbal Autopsy | Sylhet-Dayamir (Rural)                                                | 2010            | 80 years +      | 1           |
| Bangladesh | Bangladesh Verbal Autopsy Study 2015                                                                                                                      | Verbal Autopsy | Sylhet-Upashahar (Urban)                                              | 2010            | 60 - 74 years   | 3           |
| Bangladesh | Bangladesh Verbal Autopsy Study 2015                                                                                                                      | Verbal Autopsy | Habiganj-Dighalbak (Rural)                                            | 2010, 2013-2015 | 65 - 69 years   | 2           |
| Bangladesh | Bangladesh Verbal Autopsy Study 2015                                                                                                                      | Verbal Autopsy | Noakhali-Bazra (Rural)                                                | 2010-2011       | 60 - 64 years   | 3           |
| Bangladesh | Bangladesh Verbal Autopsy Study 2015                                                                                                                      | Verbal Autopsy | Barishal-Vatikhana (Urban)                                            | 2010-2012       | 35 - 39 years   | 1           |
| Bangladesh | Maternal and Antenatal Risk Factors for Stillbirths and Neonatal Mortality in Rural Bangladesh: A Case-Control Study                                      | Verbal Autopsy | [rural]                                                               | 2011            | birth - 27 days | 112         |
| Bangladesh | Bangladesh Verbal Autopsy Study 2015                                                                                                                      | Verbal Autopsy | Barguna-Badarkhali (Rural)                                            | 2011            | 65 - 69 years   | 1           |
| Bangladesh | Bangladesh Verbal Autopsy Study 2015                                                                                                                      | Verbal Autopsy | Barguna-Belagi sadar (Rural)                                          | 2011            | 80 years +      | 1           |
| Bangladesh | Bangladesh Verbal Autopsy Study 2015                                                                                                                      | Verbal Autopsy | Chuadanga-Uthali (Rural)                                              | 2011            | 80 years +      | 1           |
| Bangladesh | Bangladesh Verbal Autopsy Study 2015                                                                                                                      | Verbal Autopsy | Cox's Bazar-Harbang (Rural)                                           | 2011            | 75 - 79 years   | 1           |
| Bangladesh | Bangladesh Verbal Autopsy Study 2015                                                                                                                      | Verbal Autopsy | Cox's Bazar-Raja palong (Rural)                                       | 2011            | 20 - 24 years   | 1           |



**Appendix Table 6: Causes of death data source list by geography, source type, and study site, with years, age range, and sample size, excluding sources on lower respiratory infection and diarrhoea etiologies**

| Location   | Source name                                                               | Source type    | Site                              | Years           | Ages          | Sample size |
|------------|---------------------------------------------------------------------------|----------------|-----------------------------------|-----------------|---------------|-------------|
| Bangladesh | Bangladesh Verbal Autopsy Study 2015                                      | Verbal Autopsy | Dhaka-Badda (Urban)               | 2011            | 45 - 74 years | 2           |
| Bangladesh | Bangladesh Verbal Autopsy Study 2015                                      | Verbal Autopsy | Dhaka-Uattra (Urban)              | 2011            | 60 - 64 years | 1           |
| Bangladesh | Bangladesh Verbal Autopsy Study 2015                                      | Verbal Autopsy | Khulna-Sonadanga (Urban)          | 2011            | 5 - 9 years   | 1           |
| Bangladesh | Bangladesh Verbal Autopsy Study 2015                                      | Verbal Autopsy | Kurigram-Belgachha (Rural)        | 2011            | 80 years +    | 1           |
| Bangladesh | Bangladesh Verbal Autopsy Study 2015                                      | Verbal Autopsy | Kurigram-Charbhurungamari (Rural) | 2011            | 80 years +    | 1           |
| Bangladesh | Bangladesh Verbal Autopsy Study 2015                                      | Verbal Autopsy | Kushtia-Ambaria (Rural)           | 2011            | 75 - 79 years | 1           |
| Bangladesh | Bangladesh Verbal Autopsy Study 2015                                      | Verbal Autopsy | Meherpur-Bagoan (Rural)           | 2011            | 65 - 69 years | 1           |
| Bangladesh | Bangladesh Verbal Autopsy Study 2015                                      | Verbal Autopsy | Moulvibazar-Alinagar (Rural)      | 2011            | 15 - 19 years | 1           |
| Bangladesh | Bangladesh Verbal Autopsy Study 2015                                      | Verbal Autopsy | Mymensingh-Balikhana (Rural)      | 2011            | 65 - 69 years | 1           |
| Bangladesh | Bangladesh Verbal Autopsy Study 2015                                      | Verbal Autopsy | Naogaon-Sreemantapur (Rural)      | 2011            | 40 - 44 years | 1           |
| Bangladesh | Bangladesh Verbal Autopsy Study 2015                                      | Verbal Autopsy | Panchagarh-Dhamor (Rural)         | 2011            | 80 years +    | 1           |
| Bangladesh | Bangladesh Verbal Autopsy Study 2015                                      | Verbal Autopsy | Rajbari-Boalia (Rural)            | 2011            | 20 - 24 years | 1           |
| Bangladesh | Bangladesh Verbal Autopsy Study 2015                                      | Verbal Autopsy | Rajshahi-Mohanpur (Rural)         | 2011            | 40 - 44 years | 1           |
| Bangladesh | Bangladesh Verbal Autopsy Study 2015                                      | Verbal Autopsy | Rangpur-Haragachh (Rural)         | 2011            | 45 - 49 years | 1           |
| Bangladesh | Bangladesh Verbal Autopsy Study 2015                                      | Verbal Autopsy | Sariatpur-Kedarpur (Rural)        | 2011            | 70 - 74 years | 1           |
| Bangladesh | Bangladesh Verbal Autopsy Study 2015                                      | Verbal Autopsy | Sherpur-Rani Shimul (Rural)       | 2011            | 65 - 69 years | 1           |
| Bangladesh | Bangladesh Verbal Autopsy Study 2015                                      | Verbal Autopsy | Bogra-Amrul (Rural)               | 2011, 2013-2015 | 50 - 54 years | 2           |
| Bangladesh | Bangladesh - Chandpur and Comilla District Verbal Autopsy Study 2011-2014 | Verbal Autopsy | Matlab HDSS                       | 2011-2013       | All Ages      | 4433        |
| Bangladesh | Bangladesh Verbal Autopsy Study 2015                                      | Verbal Autopsy | Dhaka-Sharulia (Urban)            | 2011-2015       | 20 - 74 years | 5           |
| Bangladesh | Bangladesh Verbal Autopsy Study 2015                                      | Verbal Autopsy | Dhaka-Tejgaon (Urban)             | 2011-2015       | 60 - 64 years | 1           |
| Bangladesh | Bangladesh Verbal Autopsy Study 2015                                      | Verbal Autopsy | Rajbari-Baliakandi (Rural)        | 2011-2015       | 20 - 24 years | 1           |
| Bangladesh | Bangladesh Verbal Autopsy Study 2015                                      | Verbal Autopsy | Faridpur-Bhawal (Rural)           | 2012            | 75 - 79 years | 1           |
| Bangladesh | Bangladesh Verbal Autopsy Study 2015                                      | Verbal Autopsy | Habiganj-Gazipur (Rural)          | 2012            | 45 - 49 years | 1           |
| Bangladesh | Bangladesh Verbal Autopsy Study 2015                                      | Verbal Autopsy | Jatrabari-West Jurain (Urban)     | 2012            | 65 - 69 years | 1           |
| Bangladesh | Bangladesh Verbal Autopsy Study 2015                                      | Verbal Autopsy | Jessore-Sundoli (Rural)           | 2012            | 75 - 79 years | 1           |
| Bangladesh | Bangladesh Verbal Autopsy Study 2015                                      | Verbal Autopsy | Kishoregonj-Jirani (Rural)        | 2012            | 80 years +    | 1           |
| Bangladesh | Bangladesh Verbal Autopsy Study 2015                                      | Verbal Autopsy | Kushtia-Korsha (Rural)            | 2012            | 55 - 59 years | 1           |
| Bangladesh | Bangladesh Verbal Autopsy Study 2015                                      | Verbal Autopsy | Mymensingh-Char Ishwardia (Rural) | 2012            | 30 - 34 years | 1           |
| Bangladesh | Bangladesh Verbal Autopsy Study 2015                                      | Verbal Autopsy | Mymensingh-Char Nilaxmia (Rural)  | 2012            | 70 - 74 years | 1           |
| Bangladesh | Bangladesh Verbal Autopsy Study 2015                                      | Verbal Autopsy | Noakhali-Ramnayanpur (Rural)      | 2012            | 70 - 74 years | 1           |
| Bangladesh | Bangladesh Verbal Autopsy Study 2015                                      | Verbal Autopsy | Pirojpur-Gulishakhali (Rural)     | 2012            | 70 - 74 years | 1           |
| Bangladesh | Bangladesh Verbal Autopsy Study 2015                                      | Verbal Autopsy | Rangpur-Rajendrapur (Rural)       | 2012            | 80 years +    | 2           |
| Bangladesh | Bangladesh Verbal Autopsy Study 2015                                      | Verbal Autopsy | Sylhet-Dayamir (Rural)            | 2012            | 55 - 59 years | 1           |
| Bangladesh | Bangladesh Verbal Autopsy Study 2015                                      | Verbal Autopsy | Sylhet-Upashahar (Urban)          | 2012            | 70 - 74 years | 1           |
| Bangladesh | Bangladesh Verbal Autopsy Study 2015                                      | Verbal Autopsy | Barishal-Shikarpur (Rural)        | 2012-2013       | 60 - 64 years | 1           |
| Bangladesh | Bangladesh Verbal Autopsy Study 2015                                      | Verbal Autopsy | Dhaka-Lalbag (Urban)              | 2012-2013       | 80 years +    | 1           |
| Bangladesh | Bangladesh Verbal Autopsy Study 2015                                      | Verbal Autopsy | Dhaka-Uttar Khan (Urban)          | 2012-2013       | 25 - 29 years | 1           |
| Bangladesh | Bangladesh Verbal Autopsy Study 2015                                      | Verbal Autopsy | Noakhali-Mir Warishpur (Rural)    | 2012-2013       | 70 - 74 years | 1           |

**Appendix Table 6: Causes of death data source list by geography, source type, and study site, with years, age range, and sample size, excluding sources on lower respiratory infection and diarrhoea etiologies**

| Location   | Source name                          | Source type    | Site                              | Years     | Ages          | Sample size |
|------------|--------------------------------------|----------------|-----------------------------------|-----------|---------------|-------------|
| Bangladesh | Bangladesh Verbal Autopsy Study 2015 | Verbal Autopsy | Chandpur-Dakshin Rupsa (Rural)    | 2012-2014 | 70 - 74 years | 1           |
| Bangladesh | Bangladesh Verbal Autopsy Study 2015 | Verbal Autopsy | Cox's Bazar-Garjanika (Rural)     | 2012-2015 | 50 years +    | 2           |
| Bangladesh | Bangladesh Verbal Autopsy Study 2015 | Verbal Autopsy | Faridpur-Parameshwardi (Rural)    | 2012-2015 | 80 years +    | 2           |
| Bangladesh | Bangladesh Verbal Autopsy Study 2015 | Verbal Autopsy | Kushtia-Alampur (Rural)           | 2012-2015 | 60 - 64 years | 1           |
| Bangladesh | Bangladesh Verbal Autopsy Study 2015 | Verbal Autopsy | Dhaka-Kamrangirchar (Urban)       | 2013      | 80 years +    | 1           |
| Bangladesh | Bangladesh Verbal Autopsy Study 2015 | Verbal Autopsy | Dhaka-Uattra (Urban)              | 2013      | 80 years +    | 1           |
| Bangladesh | Bangladesh Verbal Autopsy Study 2015 | Verbal Autopsy | Kushtia-Gopogram (Rural)          | 2013      | 80 years +    | 1           |
| Bangladesh | Bangladesh Verbal Autopsy Study 2015 | Verbal Autopsy | Noakhali-Arjuntala=28 (Rural)     | 2013      | 80 years +    | 1           |
| Bangladesh | Bangladesh Verbal Autopsy Study 2015 | Verbal Autopsy | Panchagarh-Dhamor (Rural)         | 2013      | 25 - 29 years | 1           |
| Bangladesh | Bangladesh Verbal Autopsy Study 2015 | Verbal Autopsy | Sylhet-Gilachhara (Rural)         | 2013      | 80 years +    | 1           |
| Bangladesh | Bangladesh Verbal Autopsy Study 2015 | Verbal Autopsy | Sylhet-Paschim Amura (Rural)      | 2013      | 20 - 24 years | 1           |
| Bangladesh | Bangladesh Verbal Autopsy Study 2015 | Verbal Autopsy | Bogra-Kharna (Rural)              | 2013-2014 | 60 - 64 years | 1           |
| Bangladesh | Bangladesh Verbal Autopsy Study 2015 | Verbal Autopsy | Cox's Bazar-Harbang (Rural)       | 2013-2014 | 80 years +    | 2           |
| Bangladesh | Bangladesh Verbal Autopsy Study 2015 | Verbal Autopsy | Netrokona-Sunai (Rural)           | 2013-2014 | 5 - 29 years  | 2           |
| Bangladesh | Bangladesh Verbal Autopsy Study 2015 | Verbal Autopsy | Bagerhat-Baintola (Rural)         | 2013-2015 | 70 - 74 years | 1           |
| Bangladesh | Bangladesh Verbal Autopsy Study 2015 | Verbal Autopsy | Bagerhat-Gazalia (Rural)          | 2013-2015 | 80 years +    | 1           |
| Bangladesh | Bangladesh Verbal Autopsy Study 2015 | Verbal Autopsy | Barguna-Aylapatakata (Rural)      | 2013-2015 | 65 - 69 years | 2           |
| Bangladesh | Bangladesh Verbal Autopsy Study 2015 | Verbal Autopsy | Barguna-Badarkhali (Rural)        | 2013-2015 | 25 - 29 years | 1           |
| Bangladesh | Bangladesh Verbal Autopsy Study 2015 | Verbal Autopsy | Bhola-Illisha (Rural)             | 2013-2015 | 45 - 49 years | 1           |
| Bangladesh | Bangladesh Verbal Autopsy Study 2015 | Verbal Autopsy | Bhola-Paschim Char Umed (Rural)   | 2013-2015 | 50 - 54 years | 1           |
| Bangladesh | Bangladesh Verbal Autopsy Study 2015 | Verbal Autopsy | Bhola-Uttar Dighaldi (Rural)      | 2013-2015 | 80 years +    | 1           |
| Bangladesh | Bangladesh Verbal Autopsy Study 2015 | Verbal Autopsy | Chuadanga-Uthali (Rural)          | 2013-2015 | 60 - 64 years | 1           |
| Bangladesh | Bangladesh Verbal Autopsy Study 2015 | Verbal Autopsy | Cox's Bazar-Raja palong (Rural)   | 2013-2015 | 25 - 29 years | 1           |
| Bangladesh | Bangladesh Verbal Autopsy Study 2015 | Verbal Autopsy | Dhaka-Hajaribag (Urban)           | 2013-2015 | 55 - 59 years | 1           |
| Bangladesh | Bangladesh Verbal Autopsy Study 2015 | Verbal Autopsy | Dhaka-Sutrapur (Urban)            | 2013-2015 | 70 - 74 years | 1           |
| Bangladesh | Bangladesh Verbal Autopsy Study 2015 | Verbal Autopsy | Jamalpur-Nayanagar (Rural)        | 2013-2015 | 65 - 69 years | 1           |
| Bangladesh | Bangladesh Verbal Autopsy Study 2015 | Verbal Autopsy | Jamalpur-Satpoa (Rural)           | 2013-2015 | 70 - 74 years | 1           |
| Bangladesh | Bangladesh Verbal Autopsy Study 2015 | Verbal Autopsy | Kurigram-Charbhurungamari (Rural) | 2013-2015 | 5 - 9 years   | 1           |
| Bangladesh | Bangladesh Verbal Autopsy Study 2015 | Verbal Autopsy | Mymensingh-Achargaon (Rural)      | 2013-2015 | 80 years +    | 1           |
| Bangladesh | Bangladesh Verbal Autopsy Study 2015 | Verbal Autopsy | Naogaon-Kalikapur (Rural)         | 2013-2015 | 35 - 39 years | 1           |
| Bangladesh | Bangladesh Verbal Autopsy Study 2015 | Verbal Autopsy | Netrokona-Chhiram (Rural)         | 2013-2015 | 75 - 79 years | 1           |
| Bangladesh | Bangladesh Verbal Autopsy Study 2015 | Verbal Autopsy | Netrokona-Sandikona (Rural)       | 2013-2015 | 70 - 74 years | 1           |
| Bangladesh | Bangladesh Verbal Autopsy Study 2015 | Verbal Autopsy | Nilphamari-Sonaroy (Rural)        | 2013-2015 | 80 years +    | 1           |
| Bangladesh | Bangladesh Verbal Autopsy Study 2015 | Verbal Autopsy | Noakhali-Bazra (Rural)            | 2013-2015 | 80 years +    | 2           |
| Bangladesh | Bangladesh Verbal Autopsy Study 2015 | Verbal Autopsy | Noakhali-Gopalpur (Rural)         | 2013-2015 | 5 years +     | 2           |
| Bangladesh | Bangladesh Verbal Autopsy Study 2015 | Verbal Autopsy | Rajbari-Chandani (Rural)          | 2013-2015 | 65 - 69 years | 1           |
| Bangladesh | Bangladesh Verbal Autopsy Study 2015 | Verbal Autopsy | Rajshahi-Kazihata (Urban)         | 2013-2015 | 80 years +    | 1           |
| Bangladesh | Bangladesh Verbal Autopsy Study 2015 | Verbal Autopsy | Rajshahi-Mohanpur (Rural)         | 2013-2015 | 70 - 74 years | 1           |
| Bangladesh | Bangladesh Verbal Autopsy Study 2015 | Verbal Autopsy | Rangpur-Gopalpur (Rural)          | 2013-2015 | 75 - 79 years | 1           |
| Bangladesh | Bangladesh Verbal Autopsy Study 2015 | Verbal Autopsy | Rangpur-Haragachh (Rural)         | 2013-2015 | 65 - 69 years | 1           |

**Appendix Table 6: Causes of death data source list by geography, source type, and study site, with years, age range, and sample size, excluding sources on lower respiratory infection and diarrhoea etiologies**

| Location   | Source name                          | Source type    | Site                               | Years     | Ages          | Sample size |
|------------|--------------------------------------|----------------|------------------------------------|-----------|---------------|-------------|
| Bangladesh | Bangladesh Verbal Autopsy Study 2015 | Verbal Autopsy | Barishal-Andhar Manik (Rural)      | 2014      | 60 - 64 years | 1           |
| Bangladesh | Bangladesh Verbal Autopsy Study 2015 | Verbal Autopsy | Chandpur-Paschim Gupti (Rural)     | 2014      | 45 years +    | 3           |
| Bangladesh | Bangladesh Verbal Autopsy Study 2015 | Verbal Autopsy | Chittagong-Kelishahar (Rural)      | 2014      | 55 - 59 years | 1           |
| Bangladesh | Bangladesh Verbal Autopsy Study 2015 | Verbal Autopsy | Cox's Bazar-Lemsikhali (Rural)     | 2014      | 80 years +    | 1           |
| Bangladesh | Bangladesh Verbal Autopsy Study 2015 | Verbal Autopsy | Dhaka-Gulshan (Urban)              | 2014      | 50 - 64 years | 2           |
| Bangladesh | Bangladesh Verbal Autopsy Study 2015 | Verbal Autopsy | Dhaka-Shampur (Urban)              | 2014      | 25 - 34 years | 3           |
| Bangladesh | Bangladesh Verbal Autopsy Study 2015 | Verbal Autopsy | Jatrabari-West Jurain (Urban)      | 2014      | 35 - 39 years | 1           |
| Bangladesh | Bangladesh Verbal Autopsy Study 2015 | Verbal Autopsy | Madaripur-Bajitpur (Rural)         | 2014      | 60 - 64 years | 1           |
| Bangladesh | Bangladesh Verbal Autopsy Study 2015 | Verbal Autopsy | Meherpur-Bagoan (Rural)            | 2014      | 70 - 79 years | 2           |
| Bangladesh | Bangladesh Verbal Autopsy Study 2015 | Verbal Autopsy | Munshiganj-Hossaindi (Rural)       | 2014      | 55 - 59 years | 1           |
| Bangladesh | Bangladesh Verbal Autopsy Study 2015 | Verbal Autopsy | Mymensingh-Char Ishwardia (Rural)  | 2014      | 25 - 29 years | 1           |
| Bangladesh | Bangladesh Verbal Autopsy Study 2015 | Verbal Autopsy | Mymensingh-Galagaon (Rural)        | 2014      | 20 - 24 years | 1           |
| Bangladesh | Bangladesh Verbal Autopsy Study 2015 | Verbal Autopsy | Narail-Kotakol (Rural)             | 2014      | 80 years +    | 1           |
| Bangladesh | Bangladesh Verbal Autopsy Study 2015 | Verbal Autopsy | Nilphamari-Boragari (Rural)        | 2014      | 25 years +    | 2           |
| Bangladesh | Bangladesh Verbal Autopsy Study 2015 | Verbal Autopsy | Nilphamari-Ketkibari (Rural)       | 2014      | 45 years +    | 4           |
| Bangladesh | Bangladesh Verbal Autopsy Study 2015 | Verbal Autopsy | Noakhali-Kabilpur (Rural)          | 2014      | 15 - 69 years | 2           |
| Bangladesh | Bangladesh Verbal Autopsy Study 2015 | Verbal Autopsy | Rajbari-Bahadurpur (Rural)         | 2014      | 15 years +    | 2           |
| Bangladesh | Bangladesh Verbal Autopsy Study 2015 | Verbal Autopsy | Sylhet-Upashahar (Urban)           | 2014      | 10 - 59 years | 3           |
| Bangladesh | Bangladesh Verbal Autopsy Study 2015 | Verbal Autopsy | Bagerhat-Chitalmari sadar (Rural)  | 2014-2015 | 65 years +    | 2           |
| Bangladesh | Bangladesh Verbal Autopsy Study 2015 | Verbal Autopsy | Barishal-Vatikhana (Urban)         | 2014-2015 | 50 years +    | 2           |
| Bangladesh | Bangladesh Verbal Autopsy Study 2015 | Verbal Autopsy | Bogra-Dhupchanchia (Rural)         | 2014-2015 | 60 - 64 years | 1           |
| Bangladesh | Bangladesh Verbal Autopsy Study 2015 | Verbal Autopsy | Bogra-Goshaibari (Rural)           | 2014-2015 | 50 - 54 years | 1           |
| Bangladesh | Bangladesh Verbal Autopsy Study 2015 | Verbal Autopsy | Bogra-Majhira (Rural)              | 2014-2015 | 45 - 49 years | 1           |
| Bangladesh | Bangladesh Verbal Autopsy Study 2015 | Verbal Autopsy | Bogra-Nasratpur (Rural)            | 2014-2015 | 50 years +    | 4           |
| Bangladesh | Bangladesh Verbal Autopsy Study 2015 | Verbal Autopsy | Bogra-Shibganj (Rural)             | 2014-2015 | 50 - 59 years | 3           |
| Bangladesh | Bangladesh Verbal Autopsy Study 2015 | Verbal Autopsy | Chandpur-Uttar Rupsa (Rural)       | 2014-2015 | 70 years +    | 3           |
| Bangladesh | Bangladesh Verbal Autopsy Study 2015 | Verbal Autopsy | Chuadanga-Jehala (Rural)           | 2014-2015 | 25 years +    | 6           |
| Bangladesh | Bangladesh Verbal Autopsy Study 2015 | Verbal Autopsy | Cox's Bazar-Ali Akbar Deli (Rural) | 2014-2015 | 30 - 64 years | 2           |
| Bangladesh | Bangladesh Verbal Autopsy Study 2015 | Verbal Autopsy | Cox's Bazar-Palong Khali (Rural)   | 2014-2015 | 45 years +    | 2           |
| Bangladesh | Bangladesh Verbal Autopsy Study 2015 | Verbal Autopsy | Dhaka-Dhanmondi (Urban)            | 2014-2015 | 40 - 44 years | 1           |
| Bangladesh | Bangladesh Verbal Autopsy Study 2015 | Verbal Autopsy | Dhaka-Tongi (Urban)                | 2014-2015 | 50 years +    | 2           |
| Bangladesh | Bangladesh Verbal Autopsy Study 2015 | Verbal Autopsy | Faridpur-Bhawal (Rural)            | 2014-2015 | 65 - 69 years | 1           |
| Bangladesh | Bangladesh Verbal Autopsy Study 2015 | Verbal Autopsy | Faridpur-Gunbaha (Rural)           | 2014-2015 | 25 years +    | 2           |
| Bangladesh | Bangladesh Verbal Autopsy Study 2015 | Verbal Autopsy | Faridpur-Kaijuri (Rural)           | 2014-2015 | 80 years +    | 1           |
| Bangladesh | Bangladesh Verbal Autopsy Study 2015 | Verbal Autopsy | Gaibandha-Mahimaganj (Rural)       | 2014-2015 | 70 - 79 years | 2           |
| Bangladesh | Bangladesh Verbal Autopsy Study 2015 | Verbal Autopsy | Gazipur-Konabari (Urban)           | 2014-2015 | 50 - 54 years | 1           |
| Bangladesh | Bangladesh Verbal Autopsy Study 2015 | Verbal Autopsy | Habiganj-Adaur (Rural)             | 2014-2015 | 75 - 79 years | 1           |
| Bangladesh | Bangladesh Verbal Autopsy Study 2015 | Verbal Autopsy | Habiganj-Gazipur (Rural)           | 2014-2015 | 65 - 69 years | 1           |
| Bangladesh | Bangladesh Verbal Autopsy Study 2015 | Verbal Autopsy | Habiganj-Pailarkandi (Rural)       | 2014-2015 | 65 - 69 years | 1           |

**Appendix Table 6: Causes of death data source list by geography, source type, and study site, with years, age range, and sample size, excluding sources on lower respiratory infection and diarrhoea etiologies**

| Location   | Source name                          | Source type    | Site                            | Years     | Ages          | Sample size |
|------------|--------------------------------------|----------------|---------------------------------|-----------|---------------|-------------|
| Bangladesh | Bangladesh Verbal Autopsy Study 2015 | Verbal Autopsy | Jamalpur-Titpalla (Rural)       | 2014-2015 | 75 - 79 years | 1           |
| Bangladesh | Bangladesh Verbal Autopsy Study 2015 | Verbal Autopsy | Jessore-Arabpur (Rural)         | 2014-2015 | 20 - 24 years | 1           |
| Bangladesh | Bangladesh Verbal Autopsy Study 2015 | Verbal Autopsy | Jessore-Ganganandapur (Rural)   | 2014-2015 | 50 years +    | 3           |
| Bangladesh | Bangladesh Verbal Autopsy Study 2015 | Verbal Autopsy | Jessore-Goga (Rural)            | 2014-2015 | 55 years +    | 2           |
| Bangladesh | Bangladesh Verbal Autopsy Study 2015 | Verbal Autopsy | Jessore-Sundoli (Rural)         | 2014-2015 | 80 years +    | 2           |
| Bangladesh | Bangladesh Verbal Autopsy Study 2015 | Verbal Autopsy | Jhalokati-Kusanghal (Rural)     | 2014-2015 | 80 years +    | 1           |
| Bangladesh | Bangladesh Verbal Autopsy Study 2015 | Verbal Autopsy | Jhenaidah-Ganna (Rural)         | 2014-2015 | 25 - 79 years | 3           |
| Bangladesh | Bangladesh Verbal Autopsy Study 2015 | Verbal Autopsy | Jhenaidah-Maliat (Rural)        | 2014-2015 | 30 - 79 years | 2           |
| Bangladesh | Bangladesh Verbal Autopsy Study 2015 | Verbal Autopsy | Joypurhat-Dogachhi (Rural)      | 2014-2015 | 65 - 69 years | 1           |
| Bangladesh | Bangladesh Verbal Autopsy Study 2015 | Verbal Autopsy | Khulna-Dhamalia (Rural)         | 2014-2015 | 55 years +    | 2           |
| Bangladesh | Bangladesh Verbal Autopsy Study 2015 | Verbal Autopsy | Khulna-Sonadanga (Urban)        | 2014-2015 | 35 - 74 years | 2           |
| Bangladesh | Bangladesh Verbal Autopsy Study 2015 | Verbal Autopsy | Kurigram-Belgachha (Rural)      | 2014-2015 | 5 years +     | 6           |
| Bangladesh | Bangladesh Verbal Autopsy Study 2015 | Verbal Autopsy | Kurigram-Joymanirhat (Rural)    | 2014-2015 | 80 years +    | 2           |
| Bangladesh | Bangladesh Verbal Autopsy Study 2015 | Verbal Autopsy | Magura-Rajapur (Rural)          | 2014-2015 | 50 years +    | 2           |
| Bangladesh | Bangladesh Verbal Autopsy Study 2015 | Verbal Autopsy | Manikganj-Saturia (Rural)       | 2014-2015 | 70 - 74 years | 1           |
| Bangladesh | Bangladesh Verbal Autopsy Study 2015 | Verbal Autopsy | Manikganj-Ulail (Rural)         | 2014-2015 | 40 - 79 years | 2           |
| Bangladesh | Bangladesh Verbal Autopsy Study 2015 | Verbal Autopsy | Mymensingh-Moazzempur (Rural)   | 2014-2015 | 80 years +    | 3           |
| Bangladesh | Bangladesh Verbal Autopsy Study 2015 | Verbal Autopsy | Mymensingh-Payari (Rural)       | 2014-2015 | 60 - 64 years | 1           |
| Bangladesh | Bangladesh Verbal Autopsy Study 2015 | Verbal Autopsy | Mymensingh-Rambhadrapur (Rural) | 2014-2015 | 55 years +    | 2           |
| Bangladesh | Bangladesh Verbal Autopsy Study 2015 | Verbal Autopsy | Naogaon-Badalgachhi (Rural)     | 2014-2015 | 60 years +    | 2           |
| Bangladesh | Bangladesh Verbal Autopsy Study 2015 | Verbal Autopsy | Naogaon-Sreemantapur (Rural)    | 2014-2015 | 45 - 69 years | 3           |
| Bangladesh | Bangladesh Verbal Autopsy Study 2015 | Verbal Autopsy | Netrokona-Kailati (Rural)       | 2014-2015 | 20 years +    | 5           |
| Bangladesh | Bangladesh Verbal Autopsy Study 2015 | Verbal Autopsy | Nilphamari-Dimla (Rural)        | 2014-2015 | 10 - 74 years | 3           |
| Bangladesh | Bangladesh Verbal Autopsy Study 2015 | Verbal Autopsy | Pabna-Karamja (Rural)           | 2014-2015 | 70 - 74 years | 1           |
| Bangladesh | Bangladesh Verbal Autopsy Study 2015 | Verbal Autopsy | Panchagarh-Salbahan (Rural)     | 2014-2015 | 45 - 64 years | 2           |
| Bangladesh | Bangladesh Verbal Autopsy Study 2015 | Verbal Autopsy | Pirojpur-Gulishakhali (Rural)   | 2014-2015 | 60 - 74 years | 4           |
| Bangladesh | Bangladesh Verbal Autopsy Study 2015 | Verbal Autopsy | Rajbari-Boalia (Rural)          | 2014-2015 | 55 years +    | 5           |
| Bangladesh | Bangladesh Verbal Autopsy Study 2015 | Verbal Autopsy | Rajshahi-Kismatgankoir (Rural)  | 2014-2015 | 40 - 44 years | 1           |
| Bangladesh | Bangladesh Verbal Autopsy Study 2015 | Verbal Autopsy | Rangpur-Darshan (Rural)         | 2014-2015 | 40 - 64 years | 2           |
| Bangladesh | Bangladesh Verbal Autopsy Study 2015 | Verbal Autopsy | Rangpur-Rajendrapur (Rural)     | 2014-2015 | 60 years +    | 2           |
| Bangladesh | Bangladesh Verbal Autopsy Study 2015 | Verbal Autopsy | Satkhira-Dhandia (Rural)        | 2014-2015 | 70 - 74 years | 1           |
| Bangladesh | Bangladesh Verbal Autopsy Study 2015 | Verbal Autopsy | Sherpur-Ganapaddi (Rural)       | 2014-2015 | 50 years +    | 4           |
| Bangladesh | Bangladesh Verbal Autopsy Study 2015 | Verbal Autopsy | Sherpur-Rani Shimul (Rural)     | 2014-2015 | 20 - 24 years | 1           |
| Bangladesh | Bangladesh Verbal Autopsy Study 2015 | Verbal Autopsy | Sirajganj-Sardabad (Rural)      | 2014-2015 | 70 - 74 years | 1           |
| Bangladesh | Bangladesh Verbal Autopsy Study 2015 | Verbal Autopsy | Sylhet-Boaljur (Rural)          | 2014-2015 | 5 years +     | 3           |
| Bangladesh | Bangladesh Verbal Autopsy Study 2015 | Verbal Autopsy | Thakurgaw-Lehemba (Rural)       | 2014-2015 | 80 years +    | 1           |
| Bangladesh | Bangladesh Verbal Autopsy Study 2015 | Verbal Autopsy | Barguna-Belagi sadar (Rural)    | 2015      | 55 - 79 years | 2           |
| Bangladesh | Bangladesh Verbal Autopsy Study 2015 | Verbal Autopsy | Barishal-Bhasan Char (Rural)    | 2015      | 45 years +    | 3           |
| Bangladesh | Bangladesh Verbal Autopsy Study 2015 | Verbal Autopsy | Barishal-Shikarpur (Rural)      | 2015      | 70 - 74 years | 1           |
| Bangladesh | Bangladesh Verbal Autopsy Study 2015 | Verbal Autopsy | Bogra-Mirzapur (Rural)          | 2015      | 60 - 64 years | 1           |

**Appendix Table 6: Causes of death data source list by geography, source type, and study site, with years, age range, and sample size, excluding sources on lower respiratory infection and diarrhoea etiologies**

| Location   | Source name                                                            | Source type    | Site                             | Years     | Ages          | Sample size |
|------------|------------------------------------------------------------------------|----------------|----------------------------------|-----------|---------------|-------------|
| Bangladesh | Bangladesh Verbal Autopsy Study 2015                                   | Verbal Autopsy | Chittagong-Lalkhanbazar (Urban)  | 2015      | 55 - 59 years | 1           |
| Bangladesh | Bangladesh Verbal Autopsy Study 2015                                   | Verbal Autopsy | Comilla-Mainamati (Rural)        | 2015      | 10 - 69 years | 2           |
| Bangladesh | Bangladesh Verbal Autopsy Study 2015                                   | Verbal Autopsy | Cox's Bazar-Kaiyabil (Rural)     | 2015      | 40 - 54 years | 2           |
| Bangladesh | Bangladesh Verbal Autopsy Study 2015                                   | Verbal Autopsy | Feni-Dharampur (Rural)           | 2015      | 5 years +     | 4           |
| Bangladesh | Bangladesh Verbal Autopsy Study 2015                                   | Verbal Autopsy | Gaibandha-Naldanga (Rural)       | 2015      | 45 years +    | 3           |
| Bangladesh | Bangladesh Verbal Autopsy Study 2015                                   | Verbal Autopsy | Habiganj-Bahara (Rural)          | 2015      | 25 years +    | 4           |
| Bangladesh | Bangladesh Verbal Autopsy Study 2015                                   | Verbal Autopsy | Joypurhat-Ayama Rasulpur (Rural) | 2015      | 60 - 64 years | 1           |
| Bangladesh | Bangladesh Verbal Autopsy Study 2015                                   | Verbal Autopsy | Kishoregonj-Achmita (Rural)      | 2015      | 15 - 79 years | 2           |
| Bangladesh | Bangladesh Verbal Autopsy Study 2015                                   | Verbal Autopsy | Kishoregonj-Jirani (Rural)       | 2015      | 60 - 79 years | 2           |
| Bangladesh | Bangladesh Verbal Autopsy Study 2015                                   | Verbal Autopsy | Kurigram-Chakirpashar (Rural)    | 2015      | 70 years +    | 2           |
| Bangladesh | Bangladesh Verbal Autopsy Study 2015                                   | Verbal Autopsy | Kurigram-Kaliganj (Rural)        | 2015      | 55 - 79 years | 2           |
| Bangladesh | Bangladesh Verbal Autopsy Study 2015                                   | Verbal Autopsy | Kushtia-Ambaria (Rural)          | 2015      | 80 years +    | 2           |
| Bangladesh | Bangladesh Verbal Autopsy Study 2015                                   | Verbal Autopsy | Kushtia-Barakhada (Rural)        | 2015      | 70 years +    | 3           |
| Bangladesh | Bangladesh Verbal Autopsy Study 2015                                   | Verbal Autopsy | Kushtia-Gopogram (Rural)         | 2015      | 50 - 54 years | 1           |
| Bangladesh | Bangladesh Verbal Autopsy Study 2015                                   | Verbal Autopsy | Kushtia-Korsha (Rural)           | 2015      | 70 years +    | 2           |
| Bangladesh | Bangladesh Verbal Autopsy Study 2015                                   | Verbal Autopsy | Madaripur-Amgram (Rural)         | 2015      | 30 years +    | 3           |
| Bangladesh | Bangladesh Verbal Autopsy Study 2015                                   | Verbal Autopsy | Manikganj-Baliakhora (Rural)     | 2015      | 65 years +    | 6           |
| Bangladesh | Bangladesh Verbal Autopsy Study 2015                                   | Verbal Autopsy | Manikganj-Dighulia (Rural)       | 2015      | 65 - 69 years | 1           |
| Bangladesh | Bangladesh Verbal Autopsy Study 2015                                   | Verbal Autopsy | Moulvibazar-Alinagar (Rural)     | 2015      | 55 - 59 years | 1           |
| Bangladesh | Bangladesh Verbal Autopsy Study 2015                                   | Verbal Autopsy | Mymensingh-Bharadoba (Rural)     | 2015      | 40 years +    | 4           |
| Bangladesh | Bangladesh Verbal Autopsy Study 2015                                   | Verbal Autopsy | Mymensingh-Jatia (Rural)         | 2015      | 55 years +    | 4           |
| Bangladesh | Bangladesh Verbal Autopsy Study 2015                                   | Verbal Autopsy | Mymensingh-Kachina (Rural)       | 2015      | 50 years +    | 3           |
| Bangladesh | Bangladesh Verbal Autopsy Study 2015                                   | Verbal Autopsy | Noakhali-Musapur (Rural)         | 2015      | 60 - 79 years | 3           |
| Bangladesh | Bangladesh Verbal Autopsy Study 2015                                   | Verbal Autopsy | Noakhali-Ramnarayanpur (Rural)   | 2015      | 55 - 59 years | 1           |
| Bangladesh | Bangladesh Verbal Autopsy Study 2015                                   | Verbal Autopsy | Patuakhali-Kalaiya (Rural)       | 2015      | 5 years +     | 4           |
| Bangladesh | Bangladesh Verbal Autopsy Study 2015                                   | Verbal Autopsy | Pirojpur-Dirgha (Rural)          | 2015      | 15 - 79 years | 2           |
| Bangladesh | Bangladesh Verbal Autopsy Study 2015                                   | Verbal Autopsy | Rangamati-Bhasanya Adam (Rural)  | 2015      | 50 years +    | 9           |
| Bangladesh | Bangladesh Verbal Autopsy Study 2015                                   | Verbal Autopsy | Rangpur-Pirganj (Rural)          | 2015      | 45 - 74 years | 3           |
| Bangladesh | Bangladesh Verbal Autopsy Study 2015                                   | Verbal Autopsy | Sariatpur-Kedarpur (Rural)       | 2015      | 60 - 64 years | 1           |
| Bangladesh | Bangladesh Verbal Autopsy Study 2015                                   | Verbal Autopsy | Satkhira-Shyamnagar (Rural)      | 2015      | 30 years +    | 4           |
| Bangladesh | Bangladesh Verbal Autopsy Study 2015                                   | Verbal Autopsy | Sherpur-Jhenaigati (Rural)       | 2015      | 55 years +    | 2           |
| Bangladesh | Bangladesh Verbal Autopsy Study 2015                                   | Verbal Autopsy | Sherpur-Marichpuran (Rural)      | 2015      | 75 years +    | 2           |
| Bangladesh | Bangladesh Verbal Autopsy Study 2015                                   | Verbal Autopsy | Sherpur-Rupnarayanpura (Rural)   | 2015      | 25 - 29 years | 1           |
| Bangladesh | Bangladesh Verbal Autopsy Study 2015                                   | Verbal Autopsy | Sirajganj-Shialkol (Rural)       | 2015      | 65 years +    | 2           |
| Bangladesh | Bangladesh Verbal Autopsy Study 2015                                   | Verbal Autopsy | Sylhet-Dayamir (Rural)           | 2015      | 45 years +    | 3           |
| Bangladesh | Bangladesh Verbal Autopsy Study 2015                                   | Verbal Autopsy | Sylhet-Gilachhara (Rural)        | 2015      | 20 - 64 years | 2           |
| Bangladesh | Bangladesh Verbal Autopsy Study 2015                                   | Verbal Autopsy | Sylhet-Omarpur (Rural)           | 2015      | 45 - 49 years | 1           |
| Bhutan     | United Nations Office on Drugs and Crime Global Study on Homicide 2011 | Police Records | Bhutan NSO                       | 2000-2007 | All Ages      | Death Rate  |
| Bhutan     | Bhutan Demographic Sample Survey 1984                                  | Survey/Census  |                                  | 1984      | 15 - 49 years | MMR         |

**Appendix Table 6: Causes of death data source list by geography, source type, and study site, with years, age range, and sample size, excluding sources on lower respiratory infection and diarrhoea etiologies**

| Location                        | Source name                                                                                                                               | Source type        | Site                                                      | Years                | Ages             | Sample size |
|---------------------------------|-------------------------------------------------------------------------------------------------------------------------------------------|--------------------|-----------------------------------------------------------|----------------------|------------------|-------------|
| Bhutan                          | Bhutan Health Survey 1994                                                                                                                 | Survey/Census      |                                                           | 1994                 | 15 - 49 years    | MMR         |
| Bhutan                          | Bhutan Health Survey 2000                                                                                                                 | Survey/Census      |                                                           | 2000                 | 15 - 49 years    | MMR         |
| Bhutan                          | Bhutan Population and Housing Census 2005                                                                                                 | Survey/Census      |                                                           | 2004                 | All Ages         | 4498        |
| India: Andhra Pradesh, Rural    | India District Level Household Survey (DLHS)                                                                                              | Sibling history    |                                                           | 2001, 2006           | 10 - 54 years    | 517         |
| India: Andhra Pradesh, Rural    | Demographic and Health Survey (DHS)                                                                                                       | Survey/Census      |                                                           | 1992, 1998           | All Ages         | 781         |
| India: Andhra Pradesh, Rural    | India Survey of Causes of Death (SCD)                                                                                                     | Verbal Autopsy     |                                                           | 1980-1998            | All Ages         | 36338       |
| India: Andhra Pradesh, Rural    | Levels and causes of maternal mortality in southern India                                                                                 | Verbal Autopsy     | Anantapur district Andhra Pradesh [rural]                 | 1984                 | 15 - 49 years    | 867         |
| India: Andhra Pradesh, Rural    | Chronic diseases now a leading cause of death in rural India – mortality data from the Andhra Pradesh Rural Health Initiative             | Verbal Autopsy     |                                                           | 2003                 | birth - 79 years | 1339        |
| India: Andhra Pradesh, Rural    | India - Andhra Pradesh Rural Health Initiative Mortality Surveillance 2003-2007                                                           | Verbal Autopsy     | Godavari                                                  | 2004-2007            | All Ages         | 5786        |
| India: Andhra Pradesh, Rural    | India - Andhra Pradesh and Odisha Mortality Survey 2005-2006                                                                              | Verbal Autopsy     |                                                           | 2005                 | 15 years +       | 248682      |
| India: Andhra Pradesh, Rural    | India Sample Registration System (SRS)                                                                                                    | Verbal Autopsy     |                                                           | 2005, 2011           | All Ages         | 11157       |
| India: Andhra Pradesh, Rural    | Effects on the estimated cause-specific mortality fraction of providing physician reviewers with different formats of verbal autopsy data | Verbal Autopsy     | 45 villages East and West Godavari Andhra Pradesh [rural] | 2006                 | All Ages         | 2814        |
| India: Andhra Pradesh, Rural    | Study of causes of deaths among the insured population of a north eastern district of Andhra Pradesh                                      | Verbal Autopsy     | Vizianagaram []                                           | 2009                 | birth - 44 years | 141         |
| India: Andhra Pradesh, Rural    | India Vital Statistics                                                                                                                    | Vital Registration |                                                           | 1983-1984, 1986-1995 | All Ages         | 1050116     |
| India: Andhra Pradesh, Urban    | India District Level Household Survey (DLHS)                                                                                              | Sibling history    |                                                           | 2001, 2006           | 10 - 54 years    | 119         |
| India: Andhra Pradesh, Urban    | Demographic and Health Survey (DHS)                                                                                                       | Survey/Census      |                                                           | 1992, 1998           | All Ages         | 218         |
| India: Andhra Pradesh, Urban    | Levels and causes of maternal mortality in southern India                                                                                 | Verbal Autopsy     | Anantapur district Andhra Pradesh [periurban]             | 1984                 | 15 - 49 years    | 206         |
| India: Andhra Pradesh, Urban    | India - Andhra Pradesh and Odisha Mortality Survey 2005-2006                                                                              | Verbal Autopsy     |                                                           | 2005                 | 15 years +       | 52748       |
| India: Andhra Pradesh, Urban    | India Sample Registration System (SRS)                                                                                                    | Verbal Autopsy     |                                                           | 2005, 2011           | All Ages         | 7991        |
| India: Andhra Pradesh, Urban    | India Vital Statistics                                                                                                                    | Vital Registration |                                                           | 1980-1984, 1986-1995 | All Ages         | 955646      |
| India: Andhra Pradesh, Urban    | India Medical Certification of Cause of Death (MCCD)                                                                                      | Vital Registration |                                                           | 1990-2010            | All Ages         | 729764      |
| India: Arunāchal Pradesh, Rural | India District Level Household Survey (DLHS)                                                                                              | Sibling history    |                                                           | 2001, 2006           | 10 - 54 years    | 243         |
| India: Arunāchal Pradesh, Rural | Demographic and Health Survey (DHS)                                                                                                       | Survey/Census      |                                                           | 1992, 1998           | All Ages         | 305         |
| India: Arunāchal Pradesh, Rural | India Survey of Causes of Death (SCD)                                                                                                     | Verbal Autopsy     |                                                           | 1980-1998            | All Ages         | 955         |
| India: Arunāchal Pradesh, Rural | India Sample Registration System (SRS)                                                                                                    | Verbal Autopsy     |                                                           | 2005, 2011           | All Ages         | 271         |
| India: Arunāchal Pradesh, Rural | India Vital Statistics                                                                                                                    | Vital Registration |                                                           | 1986-1995            | All Ages         | 10261       |
| India: Arunāchal Pradesh, Urban | India District Level Household Survey (DLHS)                                                                                              | Sibling history    |                                                           | 2001, 2006           | 10 - 54 years    | 35          |
| India: Arunāchal Pradesh, Urban | Demographic and Health Survey (DHS)                                                                                                       | Survey/Census      |                                                           | 1992, 1998           | All Ages         | 22          |
| India: Arunāchal Pradesh, Urban | India Sample Registration System (SRS)                                                                                                    | Verbal Autopsy     |                                                           | 2005, 2011           | All Ages         | 185         |
| India: Arunāchal Pradesh, Urban | India Vital Statistics                                                                                                                    | Vital Registration |                                                           | 1980-1984, 1986-1995 | All Ages         | 6973        |
| India: Arunāchal Pradesh, Urban | India Medical Certification of Cause of Death (MCCD)                                                                                      | Vital Registration |                                                           | 1990-2010            | All Ages         | 24978       |
| India: Assam, Rural             | India District Level Household Survey (DLHS)                                                                                              | Sibling history    |                                                           | 2001, 2006           | 10 - 54 years    | 672         |
| India: Assam, Rural             | Demographic and Health Survey (DHS)                                                                                                       | Survey/Census      |                                                           | 1992, 1998           | All Ages         | 671         |
| India: Assam, Rural             | India Survey of Causes of Death (SCD)                                                                                                     | Verbal Autopsy     |                                                           | 1980-1998            | All Ages         | 7415        |
| India: Assam, Rural             | India SRS Maternal Mortality: Trends, Causes and Risk Factors 1997-2003                                                                   | Verbal Autopsy     |                                                           | 1999-2003            | 10 - 54 years    | MMR         |

**Appendix Table 6: Causes of death data source list by geography, source type, and study site, with years, age range, and sample size, excluding sources on lower respiratory infection and diarrhoea etiologies**

| Location                   | Source name                                                                                 | Source type        | Site          | Years                      | Ages             | Sample size |
|----------------------------|---------------------------------------------------------------------------------------------|--------------------|---------------|----------------------------|------------------|-------------|
| India: Assam, Rural        | India Study on Causes of Death by Verbal Autopsy 2003                                       | Verbal Autopsy     |               | 2003                       | All Ages         | 1382        |
| India: Assam, Rural        | India SRS Maternal Mortality Tables 2001-2009                                               | Verbal Autopsy     |               | 2004, 2006-2009            | 10 - 54 years    | MMR         |
| India: Assam, Rural        | India Sample Registration System (SRS)                                                      | Verbal Autopsy     |               | 2005, 2011                 | All Ages         | 10047       |
| India: Assam, Rural        | India SRS Special Bulletin on Maternal Mortality 2010-2012                                  | Verbal Autopsy     |               | 2010                       | 10 - 54 years    | MMR         |
| India: Assam, Rural        | India SRS Maternal Mortality Ratio Bulletin 2011-2013                                       | Verbal Autopsy     |               | 2011-2013                  | 10 - 54 years    | MMR         |
| India: Assam, Urban        | India District Level Household Survey (DLHS)                                                | Sibling history    |               | 2001, 2006                 | 10 - 54 years    | 80          |
| India: Assam, Urban        | Demographic and Health Survey (DHS)                                                         | Survey/Census      |               | 1992, 1998                 | All Ages         | 197         |
| India: Assam, Urban        | India SRS Maternal Mortality: Trends, Causes and Risk Factors 1997-2003                     | Verbal Autopsy     |               | 1999-2003                  | 10 - 54 years    | MMR         |
| India: Assam, Urban        | India Study on Causes of Death by Verbal Autopsy 2003                                       | Verbal Autopsy     |               | 2003                       | All Ages         | 499         |
| India: Assam, Urban        | India SRS Maternal Mortality Tables 2001-2009                                               | Verbal Autopsy     |               | 2004, 2006-2009            | 10 - 54 years    | MMR         |
| India: Assam, Urban        | India Sample Registration System (SRS)                                                      | Verbal Autopsy     |               | 2005, 2011                 | All Ages         | 6842        |
| India: Assam, Urban        | India SRS Special Bulletin on Maternal Mortality 2010-2012                                  | Verbal Autopsy     |               | 2010                       | 10 - 54 years    | MMR         |
| India: Assam, Urban        | India SRS Maternal Mortality Ratio Bulletin 2011-2013                                       | Verbal Autopsy     |               | 2011-2013                  | 10 - 54 years    | MMR         |
| India: Assam, Urban        | India Vital Statistics                                                                      | Vital Registration |               | 1980-1984, 1986-1987, 1989 | All Ages         | 18270       |
| India: Assam, Urban        | India Medical Certification of Cause of Death (MCCD)                                        | Vital Registration |               | 1990-2010                  | All Ages         | 273416      |
| India: Bihār, Rural        | India District Level Household Survey (DLHS)                                                | Sibling history    |               | 2001, 2006                 | 10 - 54 years    | 1421        |
| India: Bihār, Rural        | Demographic and Health Survey (DHS)                                                         | Survey/Census      |               | 1992, 1998                 | All Ages         | 1755        |
| India: Bihār, Rural        | India Survey of Causes of Death (SCD)                                                       | Verbal Autopsy     |               | 1980-1998                  | All Ages         | 34500       |
| India: Bihār, Rural        | India Study on Causes of Death by Verbal Autopsy 2003                                       | Verbal Autopsy     |               | 2003                       | All Ages         | 3088        |
| India: Bihār, Rural        | India Sample Registration System (SRS)                                                      | Verbal Autopsy     |               | 2005, 2011                 | All Ages         | 14022       |
| India: Bihār, Rural        | India Vital Statistics                                                                      | Vital Registration |               | 1986-1995                  | All Ages         | 1890401     |
| India: Bihār, Urban        | India District Level Household Survey (DLHS)                                                | Sibling history    |               | 2001, 2006                 | 10 - 54 years    | 133         |
| India: Bihār, Urban        | Infant and early childhood mortality in urban slums under ICDS scheme - a prospective study | Survey/Census      | Patna [urban] | 1987                       | birth - 364 days | 32          |
| India: Bihār, Urban        | Demographic and Health Survey (DHS)                                                         | Survey/Census      |               | 1992, 1998                 | All Ages         | 245         |
| India: Bihār, Urban        | India Study on Causes of Death by Verbal Autopsy 2003                                       | Verbal Autopsy     |               | 2003                       | All Ages         | 224         |
| India: Bihār, Urban        | India Sample Registration System (SRS)                                                      | Verbal Autopsy     |               | 2005, 2011                 | All Ages         | 9395        |
| India: Bihār, Urban        | India Vital Statistics                                                                      | Vital Registration |               | 1986-1995                  | All Ages         | 415011      |
| India: Bihār, Urban        | India Medical Certification of Cause of Death (MCCD)                                        | Vital Registration |               | 1999-2010                  | All Ages         | 136875      |
| India: Chhattīsgarh, Rural | India District Level Household Survey (DLHS)                                                | Sibling history    |               | 2001, 2006                 | 10 - 54 years    | 405         |
| India: Chhattīsgarh, Rural | India Sample Registration System (SRS)                                                      | Verbal Autopsy     |               | 2005, 2011                 | All Ages         | 2742        |
| India: Chhattīsgarh, Urban | India District Level Household Survey (DLHS)                                                | Sibling history    |               | 2001, 2006                 | 10 - 54 years    | 54          |
| India: Chhattīsgarh, Urban | India Sample Registration System (SRS)                                                      | Verbal Autopsy     |               | 2005, 2011                 | All Ages         | 1737        |
| India: Chhattīsgarh, Urban | India Medical Certification of Cause of Death (MCCD)                                        | Vital Registration |               | 1999-2010, 2012            | All Ages         | 90916       |
| India: Delhi, Rural        | India District Level Household Survey (DLHS)                                                | Sibling history    |               | 2001                       | 10 - 29 years    | 2           |
| India: Delhi, Rural        | India District Level Household Survey (DLHS)                                                | Sibling history    |               | 2006                       | 10 - 54 years    | 8           |
| India: Delhi, Rural        | Demographic and Health Survey (DHS)                                                         | Survey/Census      |               | 1992, 1998                 | All Ages         | 27          |
| India: Delhi, Rural        | India Survey of Causes of Death (SCD)                                                       | Verbal Autopsy     |               | 1980-1998                  | All Ages         | 987         |
| India: Delhi, Rural        | India Sample Registration System (SRS)                                                      | Verbal Autopsy     |               | 2005, 2011                 | All Ages         | 2979        |
| India: Delhi, Rural        | India Vital Statistics                                                                      | Vital Registration |               | 1983-1984, 1986-1995       | All Ages         | 23100       |



**Appendix Table 6: Causes of death data source list by geography, source type, and study site, with years, age range, and sample size, excluding sources on lower respiratory infection and diarrhoea etiologies**

| Location              | Source name                                                                                                                                     | Source type        | Site                                             | Years                           | Ages             | Sample size |
|-----------------------|-------------------------------------------------------------------------------------------------------------------------------------------------|--------------------|--------------------------------------------------|---------------------------------|------------------|-------------|
| India: Delhi, Urban   | Road safety in India: Challenges and opportunities                                                                                              | Police Records     | Delhi                                            | 2003                            | All Ages         | Death Rate  |
| India: Delhi, Urban   | India District Level Household Survey (DLHS)                                                                                                    | Sibling history    |                                                  | 2001, 2006                      | 10 - 54 years    | 198         |
| India: Delhi, Urban   | Demographic and Health Survey (DHS)                                                                                                             | Survey/Census      |                                                  | 1992, 1998                      | All Ages         | 533         |
| India: Delhi, Urban   | Pathways to infant mortality in urban slums of Delhi, India: implications for improving the quality of community- and hospital-based programmes | Verbal Autopsy     | 2 urban slums in Delhi [urban]                   | 1995                            | birth - 364 days | 162         |
| India: Delhi, Urban   | Changing profile of disease contributing to mortality in a resettlement colony of Delhi                                                         | Verbal Autopsy     | Gokulpuri East Delhi [urban]                     | 1999                            | All Ages         | 515         |
| India: Delhi, Urban   | Community based retrospective study of sex in infant mortality in India                                                                         | Verbal Autopsy     | Sunder Nagari Tahirpur Amar Colony Delhi [urban] | 1999                            | birth - 364 days | 442         |
| India: Delhi, Urban   | India Sample Registration System (SRS)                                                                                                          | Verbal Autopsy     |                                                  | 2005, 2011                      | All Ages         | 2035        |
| India: Delhi, Urban   | India Vital Statistics                                                                                                                          | Vital Registration |                                                  | 1980-1984, 1986-1995            | All Ages         | 732772      |
| India: Delhi, Urban   | India Medical Certification of Cause of Death (MCCD)                                                                                            | Vital Registration |                                                  | 1990-2010                       | All Ages         | 986258      |
| India: Delhi, Urban   | India - Delhi Report on Medical Certification of Cause of Deaths 2011                                                                           | Vital Registration |                                                  | 2011                            | All Ages         | 67728       |
| India: Delhi, Urban   | India - Delhi Medical Certification of Cause of Death Report 2012                                                                               | Vital Registration |                                                  | 2012                            | All Ages         | 66941       |
| India: Delhi, Urban   | India - Delhi Medical Certification of Cause of Death Report 2013                                                                               | Vital Registration |                                                  | 2013                            | All Ages         | 67281       |
| India: Goa, Rural     | India District Level Household Survey (DLHS)                                                                                                    | Sibling history    |                                                  | 2001                            | 15 - 54 years    | 2           |
| India: Goa, Rural     | India District Level Household Survey (DLHS)                                                                                                    | Sibling history    |                                                  | 2006                            | 30 - 54 years    | 7           |
| India: Goa, Rural     | Demographic and Health Survey (DHS)                                                                                                             | Survey/Census      |                                                  | 1992, 1998                      | All Ages         | 299         |
| India: Goa, Rural     | India Survey of Causes of Death (SCD)                                                                                                           | Verbal Autopsy     |                                                  | 1980-1998                       | All Ages         | 2481        |
| India: Goa, Rural     | India Sample Registration System (SRS)                                                                                                          | Verbal Autopsy     |                                                  | 2005, 2011                      | All Ages         | 175         |
| India: Goa, Rural     | India Vital Statistics                                                                                                                          | Vital Registration |                                                  | 1983, 1989-1995                 | All Ages         | 34417       |
| India: Goa, Urban     | India District Level Household Survey (DLHS)                                                                                                    | Sibling history    |                                                  | 2001                            | 25 - 54 years    | 1           |
| India: Goa, Urban     | India District Level Household Survey (DLHS)                                                                                                    | Sibling history    |                                                  | 2006                            | 10 - 54 years    | 10          |
| India: Goa, Urban     | Demographic and Health Survey (DHS)                                                                                                             | Survey/Census      |                                                  | 1992, 1998                      | All Ages         | 204         |
| India: Goa, Urban     | India Sample Registration System (SRS)                                                                                                          | Verbal Autopsy     |                                                  | 2005, 2011                      | All Ages         | 121         |
| India: Goa, Urban     | India Vital Statistics                                                                                                                          | Vital Registration |                                                  | 1980-1984, 1986-1987, 1989-1995 | All Ages         | 71782       |
| India: Goa, Urban     | India Medical Certification of Cause of Death (MCCD)                                                                                            | Vital Registration |                                                  | 1990-2010                       | All Ages         | 207921      |
| India: Gujarāt, Rural | India District Level Household Survey (DLHS)                                                                                                    | Sibling history    |                                                  | 2001, 2006                      | 10 - 54 years    | 384         |
| India: Gujarāt, Rural | Demographic and Health Survey (DHS)                                                                                                             | Survey/Census      |                                                  | 1992, 1998                      | All Ages         | 609         |
| India: Gujarāt, Rural | India Survey of Causes of Death (SCD)                                                                                                           | Verbal Autopsy     |                                                  | 1980-1998                       | All Ages         | 36004       |
| India: Gujarāt, Rural | India SRS Maternal Mortality: Trends, Causes and Risk Factors 1997-2003                                                                         | Verbal Autopsy     |                                                  | 1999-2003                       | 10 - 54 years    | MMR         |
| India: Gujarāt, Rural | India SRS Maternal Mortality Tables 2001-2009                                                                                                   | Verbal Autopsy     |                                                  | 2004, 2006-2009                 | 10 - 54 years    | MMR         |
| India: Gujarāt, Rural | India Sample Registration System (SRS)                                                                                                          | Verbal Autopsy     |                                                  | 2005, 2011                      | All Ages         | 7976        |
| India: Gujarāt, Rural | Changing epidemiology of maternal mortality in rural India: time to reset strategies for MDG-5                                                  | Verbal Autopsy     |                                                  | 2006                            | 15 - 44 years    | 871         |
| India: Gujarāt, Rural | Causes of neonatal deaths among tribal women in Gujarat, India                                                                                  | Verbal Autopsy     | Jhagadia block Gujarat [Sewa Rural registry]     | 2008                            | birth - 27 days  | 105         |
| India: Gujarāt, Rural | India SRS Special Bulletin on Maternal Mortality 2010-2012                                                                                      | Verbal Autopsy     |                                                  | 2010                            | 10 - 54 years    | MMR         |
| India: Gujarāt, Rural | India SRS Maternal Mortality Ratio Bulletin 2011-2013                                                                                           | Verbal Autopsy     |                                                  | 2011-2013                       | 10 - 54 years    | MMR         |
| India: Gujarāt, Rural | India Vital Statistics                                                                                                                          | Vital Registration |                                                  | 1983-1984, 1986-1995            | All Ages         | 1161206     |
| India: Gujarāt, Urban | India District Level Household Survey (DLHS)                                                                                                    | Sibling history    |                                                  | 2001, 2006                      | 10 - 54 years    | 151         |



**Appendix Table 6: Causes of death data source list by geography, source type, and study site, with years, age range, and sample size, excluding sources on lower respiratory infection and diarrhoea etiologies**

| Location              | Source name                                                                                                                               | Source type        | Site                                                                                   | Years                | Ages             | Sample size |
|-----------------------|-------------------------------------------------------------------------------------------------------------------------------------------|--------------------|----------------------------------------------------------------------------------------|----------------------|------------------|-------------|
| India: Gujarāt, Urban | Demographic and Health Survey (DHS)                                                                                                       | Survey/Census      |                                                                                        | 1992, 1998           | All Ages         | 304         |
| India: Gujarāt, Urban | India SRS Maternal Mortality: Trends, Causes and Risk Factors 1997-2003                                                                   | Verbal Autopsy     |                                                                                        | 1999-2003            | 10 - 54 years    | MMR         |
| India: Gujarāt, Urban | India SRS Maternal Mortality Tables 2001-2009                                                                                             | Verbal Autopsy     |                                                                                        | 2004, 2006-2009      | 10 - 54 years    | MMR         |
| India: Gujarāt, Urban | India Sample Registration System (SRS)                                                                                                    | Verbal Autopsy     |                                                                                        | 2005, 2011           | All Ages         | 5495        |
| India: Gujarāt, Urban | India SRS Special Bulletin on Maternal Mortality 2010-2012                                                                                | Verbal Autopsy     |                                                                                        | 2010                 | 10 - 54 years    | MMR         |
| India: Gujarāt, Urban | India SRS Maternal Mortality Ratio Bulletin 2011-2013                                                                                     | Verbal Autopsy     |                                                                                        | 2011-2013            | 10 - 54 years    | MMR         |
| India: Gujarāt, Urban | India Vital Statistics                                                                                                                    | Vital Registration |                                                                                        | 1980-1984, 1986-1995 | All Ages         | 1184199     |
| India: Gujarāt, Urban | India Medical Certification of Cause of Death (MCCD)                                                                                      | Vital Registration |                                                                                        | 1990-2010            | All Ages         | 455660      |
| India: Haryāna, Rural | India District Level Household Survey (DLHS)                                                                                              | Sibling history    |                                                                                        | 2001, 2006           | 10 - 54 years    | 219         |
| India: Haryāna, Rural | Demographic and Health Survey (DHS)                                                                                                       | Survey/Census      |                                                                                        | 1992, 1998           | All Ages         | 494         |
| India: Haryāna, Rural | India Survey of Causes of Death (SCD)                                                                                                     | Verbal Autopsy     |                                                                                        | 1980-1998            | All Ages         | 11861       |
| India: Haryāna, Rural | Morbidity and mortality in diarrhea in rural Haryana Indian                                                                               | Verbal Autopsy     | 69 villages in Haryana [rural]                                                         | 1983                 | birth - 4 years  | 117         |
| India: Haryāna, Rural | "Development" is not essential to reduce infant mortality rate in India: experience from the Ballabgarh project                           | Verbal Autopsy     | Ballabgarh [rural]                                                                     | 1983, 1993           | birth - 364 days | 606         |
| India: Haryāna, Rural | Socio-biological factors in underfive deaths in a rural area                                                                              | Verbal Autopsy     | 20 villages Ballabgarh Haryana [rural]                                                 | 1985                 | birth - 4 years  | 281         |
| India: Haryāna, Rural | Maternal mortality inquiry in a rural community of north India                                                                            | Verbal Autopsy     | 5 community development blocks in Ambala North India. There were 774 villages. [rural] | 1985                 | 15 - 44 years    | 257         |
| India: Haryāna, Rural | International differences in clinical patterns of diarrhoeal deaths: a comparison of children from Brazil, Senegal, Bangladesh, and India | Verbal Autopsy     | Ballabgarh Haryana state [rural]                                                       | 1988                 | birth - 4 years  | 811         |
| India: Haryāna, Rural | Management of Sick Children by Health Workers in Ballabgarh: Lessons for Implementation of IMCI in India                                  | Verbal Autopsy     | Ballabgarh [rural]                                                                     | 1998                 | birth - 364 days | 102         |
| India: Haryāna, Rural | India SRS Maternal Mortality: Trends, Causes and Risk Factors 1997-2003                                                                   | Verbal Autopsy     |                                                                                        | 1999-2003            | 10 - 54 years    | MMR         |
| India: Haryāna, Rural | Suicide an emerging public health problem: evidence from rural Haryana, India                                                             | Verbal Autopsy     | 28 villages Ballabgarh block Haryana [rural]                                           | 2002-2007, 2009      | 10 years +       | 3914        |
| India: Haryāna, Rural | Causes of death in rural adult population of North India (2002-2007), using verbal autopsy tool                                           | Verbal Autopsy     | 28 villages Ballabgarh block Haryana [rural]                                           | 2004                 | 15 years +       | 2294        |
| India: Haryāna, Rural | India SRS Maternal Mortality Tables 2001-2009                                                                                             | Verbal Autopsy     |                                                                                        | 2004, 2006-2009      | 10 - 54 years    | MMR         |
| India: Haryāna, Rural | India Sample Registration System (SRS)                                                                                                    | Verbal Autopsy     |                                                                                        | 2005, 2011           | All Ages         | 6779        |
| India: Haryāna, Rural | Adult mortality surveillance by routine health workers using a short verbal autopsy tool in rural north India                             | Verbal Autopsy     | 28 villages Ballabgarh [rural]                                                         | 2008                 | 10 years +       | 510         |
| India: Haryāna, Rural | Performance of cause-specific childhood mortality surveillance by health workers using a short verbal autopsy tool                        | Verbal Autopsy     | 28 villages Ballabgarh [rural]                                                         | 2008                 | birth - 4 years  | 143         |
| India: Haryāna, Rural | Demographic Surveillance System (DSS)                                                                                                     | Verbal Autopsy     |                                                                                        | 2009-2012            | All Ages         | 2543        |
| India: Haryāna, Rural | Using three delays model to understand the social factors responsible for neonatal deaths in rural Haryana, India                         | Verbal Autopsy     |                                                                                        | 2010                 | birth - 27 days  | 50          |
| India: Haryāna, Rural | India SRS Special Bulletin on Maternal Mortality 2010-2012                                                                                | Verbal Autopsy     |                                                                                        | 2010                 | 10 - 54 years    | MMR         |
| India: Haryāna, Rural | India SRS Maternal Mortality Ratio Bulletin 2011-2013                                                                                     | Verbal Autopsy     |                                                                                        | 2011-2013            | 10 - 54 years    | MMR         |
| India: Haryāna, Rural | India Vital Statistics                                                                                                                    | Vital Registration |                                                                                        | 1984, 1986-1995      | All Ages         | 656274      |
| India: Haryāna, Urban | India District Level Household Survey (DLHS)                                                                                              | Sibling history    |                                                                                        | 2001, 2006           | 10 - 54 years    | 82          |
| India: Haryāna, Urban | Demographic and Health Survey (DHS)                                                                                                       | Survey/Census      |                                                                                        | 1992, 1998           | All Ages         | 187         |
| India: Haryāna, Urban | India SRS Maternal Mortality: Trends, Causes and Risk Factors 1997-2003                                                                   | Verbal Autopsy     |                                                                                        | 1999-2003            | 10 - 54 years    | MMR         |

**Appendix Table 6: Causes of death data source list by geography, source type, and study site, with years, age range, and sample size, excluding sources on lower respiratory infection and diarrhoea etiologies**

| Location                        | Source name                                                             | Source type        | Site | Years                           | Ages          | Sample size |
|---------------------------------|-------------------------------------------------------------------------|--------------------|------|---------------------------------|---------------|-------------|
| India: Haryāna, Urban           | India SRS Maternal Mortality Tables 2001-2009                           | Verbal Autopsy     |      | 2004, 2006-2009                 | 10 - 54 years | MMR         |
| India: Haryāna, Urban           | India Sample Registration System (SRS)                                  | Verbal Autopsy     |      | 2005, 2011                      | All Ages      | 4621        |
| India: Haryāna, Urban           | India SRS Special Bulletin on Maternal Mortality 2010-2012              | Verbal Autopsy     |      | 2010                            | 10 - 54 years | MMR         |
| India: Haryāna, Urban           | India SRS Maternal Mortality Ratio Bulletin 2011-2013                   | Verbal Autopsy     |      | 2011-2013                       | 10 - 54 years | MMR         |
| India: Haryāna, Urban           | India Vital Statistics                                                  | Vital Registration |      | 1980-1984, 1986-1995            | All Ages      | 293130      |
| India: Haryāna, Urban           | India Medical Certification of Cause of Death (MCCD)                    | Vital Registration |      | 1990-2010                       | All Ages      | 288207      |
| India: Himachal Pradesh, Rural  | India District Level Household Survey (DLHS)                            | Sibling history    |      | 2001, 2006                      | 10 - 54 years | 123         |
| India: Himachal Pradesh, Rural  | Demographic and Health Survey (DHS)                                     | Survey/Census      |      | 1992, 1998                      | All Ages      | 456         |
| India: Himachal Pradesh, Rural  | India Survey of Causes of Death (SCD)                                   | Verbal Autopsy     |      | 1980-1998                       | All Ages      | 5043        |
| India: Himachal Pradesh, Rural  | India Sample Registration System (SRS)                                  | Verbal Autopsy     |      | 2005, 2011                      | All Ages      | 1698        |
| India: Himachal Pradesh, Rural  | India Vital Statistics                                                  | Vital Registration |      | 1988-1989, 1991-1995            | All Ages      | 108534      |
| India: Himachal Pradesh, Urban  | India District Level Household Survey (DLHS)                            | Sibling history    |      | 2001                            | 10 - 54 years | 2           |
| India: Himachal Pradesh, Urban  | India District Level Household Survey (DLHS)                            | Sibling history    |      | 2006                            | 20 - 54 years | 14          |
| India: Himachal Pradesh, Urban  | Demographic and Health Survey (DHS)                                     | Survey/Census      |      | 1992, 1998                      | All Ages      | 151         |
| India: Himachal Pradesh, Urban  | India Sample Registration System (SRS)                                  | Verbal Autopsy     |      | 2005, 2011                      | All Ages      | 1160        |
| India: Himachal Pradesh, Urban  | India Vital Statistics                                                  | Vital Registration |      | 1980-1984, 1986-1989, 1991-1995 | All Ages      | 22569       |
| India: Himachal Pradesh, Urban  | India Medical Certification of Cause of Death (MCCD)                    | Vital Registration |      | 1990-2010                       | All Ages      | 41218       |
| India: Jammu and Kashmir, Rural | India District Level Household Survey (DLHS)                            | Sibling history    |      | 2001, 2006                      | 10 - 54 years | 231         |
| India: Jammu and Kashmir, Rural | Demographic and Health Survey (DHS)                                     | Survey/Census      |      | 1992, 1998                      | All Ages      | 462         |
| India: Jammu and Kashmir, Rural | India Survey of Causes of Death (SCD)                                   | Verbal Autopsy     |      | 1980-1998                       | All Ages      | 7535        |
| India: Jammu and Kashmir, Rural | India Sample Registration System (SRS)                                  | Verbal Autopsy     |      | 2005, 2011                      | All Ages      | 2798        |
| India: Jammu and Kashmir, Rural | India Vital Statistics                                                  | Vital Registration |      | 1983-1984, 1991-1993, 1995      | All Ages      | 123347      |
| India: Jammu and Kashmir, Urban | India District Level Household Survey (DLHS)                            | Sibling history    |      | 2001                            | 20 - 54 years | 4           |
| India: Jammu and Kashmir, Urban | India District Level Household Survey (DLHS)                            | Sibling history    |      | 2006                            | 15 - 54 years | 55          |
| India: Jammu and Kashmir, Urban | Demographic and Health Survey (DHS)                                     | Survey/Census      |      | 1992, 1998                      | All Ages      | 212         |
| India: Jammu and Kashmir, Urban | India Sample Registration System (SRS)                                  | Verbal Autopsy     |      | 2005, 2011                      | All Ages      | 1911        |
| India: Jammu and Kashmir, Urban | India Vital Statistics                                                  | Vital Registration |      | 1983-1984, 1991-1993, 1995      | All Ages      | 27567       |
| India: Jharkhand, Rural         | India District Level Household Survey (DLHS)                            | Sibling history    |      | 2001, 2006                      | 10 - 54 years | 745         |
| India: Jharkhand, Rural         | India Sample Registration System (SRS)                                  | Verbal Autopsy     |      | 2005, 2011                      | All Ages      | 4856        |
| India: Jharkhand, Urban         | India District Level Household Survey (DLHS)                            | Sibling history    |      | 2001, 2006                      | 10 - 54 years | 109         |
| India: Jharkhand, Urban         | India Sample Registration System (SRS)                                  | Verbal Autopsy     |      | 2005, 2011                      | All Ages      | 3253        |
| India: Jharkhand, Urban         | India Medical Certification of Cause of Death (MCCD)                    | Vital Registration |      | 1999-2010                       | All Ages      | 43390       |
| India: Karnāṭaka, Rural         | India District Level Household Survey (DLHS)                            | Sibling history    |      | 2001, 2006                      | 10 - 54 years | 553         |
| India: Karnāṭaka, Rural         | Demographic and Health Survey (DHS)                                     | Survey/Census      |      | 1992, 1998                      | All Ages      | 703         |
| India: Karnāṭaka, Rural         | India Survey of Causes of Death (SCD)                                   | Verbal Autopsy     |      | 1980-1998                       | All Ages      | 20184       |
| India: Karnāṭaka, Rural         | India SRS Maternal Mortality: Trends, Causes and Risk Factors 1997-2003 | Verbal Autopsy     |      | 1999-2003                       | 10 - 54 years | MMR         |
| India: Karnāṭaka, Rural         | India Sample Registration System (SRS)                                  | Verbal Autopsy     |      | 2005, 2011                      | All Ages      | 14418       |
| India: Karnāṭaka, Rural         | India SRS Maternal Mortality Tables 2001-2009                           | Verbal Autopsy     |      | 2006-2009                       | 10 - 54 years | MMR         |
| India: Karnāṭaka, Rural         | India SRS Special Bulletin on Maternal Mortality 2010-2012              | Verbal Autopsy     |      | 2010                            | 10 - 54 years | MMR         |

**Appendix Table 6: Causes of death data source list by geography, source type, and study site, with years, age range, and sample size, excluding sources on lower respiratory infection and diarrhoea etiologies**

| Location                     | Source name                                                                                                                                           | Source type        | Site                                        | Years                                 | Ages             | Sample size |
|------------------------------|-------------------------------------------------------------------------------------------------------------------------------------------------------|--------------------|---------------------------------------------|---------------------------------------|------------------|-------------|
| India: Karnataka, Rural      | Institutionalizing district level infant death review: an experience from southern India                                                              | Verbal Autopsy     | Raichur district Karnataka [rural]          | 2011                                  | birth - 364 days | 443         |
| India: Karnataka, Rural      | India SRS Maternal Mortality Ratio Bulletin 2011-2013                                                                                                 | Verbal Autopsy     |                                             | 2011-2013                             | 10 - 54 years    | MMR         |
| India: Karnataka, Rural      | India Vital Statistics                                                                                                                                | Vital Registration |                                             | 1988-1989, 1991-1995                  | All Ages         | 931329      |
| India: Karnataka, Urban      | India District Level Household Survey (DLHS)                                                                                                          | Sibling history    |                                             | 2001, 2006                            | 10 - 54 years    | 207         |
| India: Karnataka, Urban      | Demographic and Health Survey (DHS)                                                                                                                   | Survey/Census      |                                             | 1992, 1998                            | All Ages         | 283         |
| India: Karnataka, Urban      | India SRS Maternal Mortality: Trends, Causes and Risk Factors 1997-2003                                                                               | Verbal Autopsy     |                                             | 1999-2003                             | 10 - 54 years    | MMR         |
| India: Karnataka, Urban      | India Sample Registration System (SRS)                                                                                                                | Verbal Autopsy     |                                             | 2005, 2011                            | All Ages         | 10300       |
| India: Karnataka, Urban      | India SRS Maternal Mortality Tables 2001-2009                                                                                                         | Verbal Autopsy     |                                             | 2006-2009                             | 10 - 54 years    | MMR         |
| India: Karnataka, Urban      | India SRS Special Bulletin on Maternal Mortality 2010-2012                                                                                            | Verbal Autopsy     |                                             | 2010                                  | 10 - 54 years    | MMR         |
| India: Karnataka, Urban      | Institutionalizing district level infant death review: an experience from southern India                                                              | Verbal Autopsy     | Dakshina Kannada district Karnataka [urban] | 2011                                  | birth - 364 days | 118         |
| India: Karnataka, Urban      | India SRS Maternal Mortality Ratio Bulletin 2011-2013                                                                                                 | Verbal Autopsy     |                                             | 2011-2013                             | 10 - 54 years    | MMR         |
| India: Karnataka, Urban      | India Vital Statistics                                                                                                                                | Vital Registration |                                             | 1980-1984, 1986-1989, 1991-1995       | All Ages         | 943107      |
| India: Karnataka, Urban      | India Medical Certification of Cause of Death (MCCD)                                                                                                  | Vital Registration |                                             | 1990-2012                             | All Ages         | 1509021     |
| India: Kerala, Rural         | India District Level Household Survey (DLHS)                                                                                                          | Sibling history    |                                             | 2001                                  | 10 - 54 years    | 38          |
| India: Kerala, Rural         | India District Level Household Survey (DLHS)                                                                                                          | Sibling history    |                                             | 2006                                  | 15 - 54 years    | 73          |
| India: Kerala, Rural         | Demographic and Health Survey (DHS)                                                                                                                   | Survey/Census      |                                             | 1992, 1998                            | All Ages         | 481         |
| India: Kerala, Rural         | India Survey of Causes of Death (SCD)                                                                                                                 | Verbal Autopsy     |                                             | 1980-1998                             | All Ages         | 9384        |
| India: Kerala, Rural         | India SRS Maternal Mortality: Trends, Causes and Risk Factors 1997-2003                                                                               | Verbal Autopsy     |                                             | 1999-2003                             | 10 - 54 years    | MMR         |
| India: Kerala, Rural         | All-cause mortality and cardiovascular mortality in Kerala state of India: results from a 5-year follow-up of 161,942 rural community dwelling adults | Verbal Autopsy     |                                             | 2004                                  | 25 years +       | 4248        |
| India: Kerala, Rural         | Risk of mortality among alcohol using adult males in a population-based cohort in Kerala, India: PROFILE study                                        | Verbal Autopsy     | rural block in KeralaPROLIFE [rural]        | 2004                                  | 20 years +       | 1859        |
| India: Kerala, Rural         | India SRS Maternal Mortality Tables 2001-2009                                                                                                         | Verbal Autopsy     |                                             | 2004, 2006-2009                       | 10 - 54 years    | MMR         |
| India: Kerala, Rural         | India Sample Registration System (SRS)                                                                                                                | Verbal Autopsy     |                                             | 2005, 2011                            | All Ages         | 6753        |
| India: Kerala, Rural         | India SRS Maternal Mortality Ratio Bulletin 2011-2013                                                                                                 | Verbal Autopsy     |                                             | 2011-2013                             | 10 - 54 years    | MMR         |
| India: Kerala, Rural         | India Vital Statistics                                                                                                                                | Vital Registration |                                             | 1991-1995                             | All Ages         | 442644      |
| India: Kerala, Urban         | India District Level Household Survey (DLHS)                                                                                                          | Sibling history    |                                             | 2001                                  | 10 - 54 years    | 24          |
| India: Kerala, Urban         | India District Level Household Survey (DLHS)                                                                                                          | Sibling history    |                                             | 2006                                  | 15 - 54 years    | 21          |
| India: Kerala, Urban         | Demographic and Health Survey (DHS)                                                                                                                   | Survey/Census      |                                             | 1992, 1998                            | All Ages         | 166         |
| India: Kerala, Urban         | India SRS Maternal Mortality: Trends, Causes and Risk Factors 1997-2003                                                                               | Verbal Autopsy     |                                             | 1999-2003                             | 10 - 54 years    | MMR         |
| India: Kerala, Urban         | India SRS Maternal Mortality Tables 2001-2009                                                                                                         | Verbal Autopsy     |                                             | 2004, 2006-2009                       | 10 - 54 years    | MMR         |
| India: Kerala, Urban         | India Sample Registration System (SRS)                                                                                                                | Verbal Autopsy     |                                             | 2005, 2011                            | All Ages         | 4819        |
| India: Kerala, Urban         | India SRS Maternal Mortality Ratio Bulletin 2011-2013                                                                                                 | Verbal Autopsy     |                                             | 2011-2013                             | 10 - 54 years    | MMR         |
| India: Kerala, Urban         | India Vital Statistics                                                                                                                                | Vital Registration |                                             | 1980-1984, 1986-1987, 1989, 1991-1995 | All Ages         | 231294      |
| India: Kerala, Urban         | India Medical Certification of Cause of Death (MCCD)                                                                                                  | Vital Registration |                                             | 1990-2010                             | All Ages         | 265607      |
| India: Madhya Pradesh, Rural | India District Level Household Survey (DLHS)                                                                                                          | Sibling history    |                                             | 2001, 2006                            | 10 - 54 years    | 923         |
| India: Madhya Pradesh, Rural | Demographic and Health Survey (DHS)                                                                                                                   | Survey/Census      |                                             | 1992, 1998                            | All Ages         | 1499        |
| India: Madhya Pradesh, Rural | India Survey of Causes of Death (SCD)                                                                                                                 | Verbal Autopsy     |                                             | 1980-1998                             | All Ages         | 37058       |

**Appendix Table 6: Causes of death data source list by geography, source type, and study site, with years, age range, and sample size, excluding sources on lower respiratory infection and diarrhoea etiologies**

| Location                     | Source name                                                                                                                                                                                       | Source type        | Site                                                                          | Years                                 | Ages             | Sample size |
|------------------------------|---------------------------------------------------------------------------------------------------------------------------------------------------------------------------------------------------|--------------------|-------------------------------------------------------------------------------|---------------------------------------|------------------|-------------|
| India: Madhya Pradesh, Rural | Causes of Neonatal Mortality: A community based study using verbal autopsy tool                                                                                                                   | Verbal Autopsy     | Jabalpur district [rural]                                                     | 2005                                  | birth - 27 days  | 69          |
| India: Madhya Pradesh, Rural | India Sample Registration System (SRS)                                                                                                                                                            | Verbal Autopsy     |                                                                               | 2005, 2011                            | All Ages         | 7930        |
| India: Madhya Pradesh, Rural | India Vital Statistics                                                                                                                                                                            | Vital Registration |                                                                               | 1983-1984, 1986-1987, 1989-1993, 1995 | All Ages         | 2925800     |
| India: Madhya Pradesh, Urban | India District Level Household Survey (DLHS)                                                                                                                                                      | Sibling history    |                                                                               | 2001, 2006                            | 10 - 54 years    | 270         |
| India: Madhya Pradesh, Urban | Demographic and Health Survey (DHS)                                                                                                                                                               | Survey/Census      |                                                                               | 1992, 1998                            | All Ages         | 418         |
| India: Madhya Pradesh, Urban | India Sample Registration System (SRS)                                                                                                                                                            | Verbal Autopsy     |                                                                               | 2005, 2011                            | All Ages         | 5026        |
| India: Madhya Pradesh, Urban | India Vital Statistics                                                                                                                                                                            | Vital Registration |                                                                               | 1980-1984, 1986-1987, 1989-1993, 1995 | All Ages         | 752171      |
| India: Madhya Pradesh, Urban | India Medical Certification of Cause of Death (MCCD)                                                                                                                                              | Vital Registration |                                                                               | 1990-2010                             | All Ages         | 448071      |
| India: Mahārāshtra, Rural    | India District Level Household Survey (DLHS)                                                                                                                                                      | Sibling history    |                                                                               | 2001, 2006                            | 10 - 54 years    | 548         |
| India: Mahārāshtra, Rural    | Demographic and Health Survey (DHS)                                                                                                                                                               | Survey/Census      |                                                                               | 1992, 1998                            | All Ages         | 537         |
| India: Mahārāshtra, Rural    | India Survey of Causes of Death (SCD)                                                                                                                                                             | Verbal Autopsy     |                                                                               | 1980-1998, 2011                       | All Ages         | 109469      |
| India: Mahārāshtra, Rural    | Reduction in pneumonia mortality and total childhood mortality by means of community-based intervention trial in Gadchiroli, India                                                                | Verbal Autopsy     | 18 villages in Gadchiroli [rural]                                             | 1988                                  | birth - 4 years  | 161         |
| India: Mahārāshtra, Rural    | A prospective cohort study on the survival experience of under five children in rural western India                                                                                               | Verbal Autopsy     | 45 villages Shirur Development Block Pune District in Maharashtra [rural]     | 1990                                  | birth - 4 years  | 286         |
| India: Mahārāshtra, Rural    | A study of registration of deaths at primary health centre--with special reference to verbal autopsy method                                                                                       | Verbal Autopsy     | Kunjirwadi Kawathe and Tisgaon PHC areas [rural]                              | 1991                                  | All Ages         | 73          |
| India: Mahārāshtra, Rural    | India SRS Maternal Mortality: Trends, Causes and Risk Factors 1997-2003                                                                                                                           | Verbal Autopsy     |                                                                               | 1999-2003                             | 10 - 54 years    | MMR         |
| India: Mahārāshtra, Rural    | India Study on Causes of Death by Verbal Autopsy 2003                                                                                                                                             | Verbal Autopsy     |                                                                               | 2003                                  | All Ages         | 899         |
| India: Mahārāshtra, Rural    | Global health and infant mortality: application of verbal autopsy tool to categorize infant deaths, ascertain their causes and identify the gaps in health management information system in India | Verbal Autopsy     | Maharashtra RuralYavatmal district [rural]                                    | 2004                                  | birth - 364 days | 78          |
| India: Mahārāshtra, Rural    | India SRS Maternal Mortality Tables 2001-2009                                                                                                                                                     | Verbal Autopsy     |                                                                               | 2004, 2006-2009                       | 10 - 54 years    | MMR         |
| India: Mahārāshtra, Rural    | A community based cross sectional study on feasibility of lay interviewers in ascertaining causes of adult deaths by using verbal autopsy in rural Wardha                                         | Verbal Autopsy     | 15 villages of Primary Health Centre Anji Wardha district Maharashtra [rural] | 2005                                  | 15 years +       | 209         |
| India: Mahārāshtra, Rural    | India Sample Registration System (SRS)                                                                                                                                                            | Verbal Autopsy     |                                                                               | 2005, 2011                            | All Ages         | 15687       |
| India: Mahārāshtra, Rural    | Demographic Surveillance System (DSS)                                                                                                                                                             | Verbal Autopsy     |                                                                               | 2009-2010                             | All Ages         | 746         |
| India: Mahārāshtra, Rural    | India SRS Special Bulletin on Maternal Mortality 2010-2012                                                                                                                                        | Verbal Autopsy     |                                                                               | 2010                                  | 10 - 54 years    | MMR         |
| India: Mahārāshtra, Rural    | India SRS Maternal Mortality Ratio Bulletin 2011-2013                                                                                                                                             | Verbal Autopsy     |                                                                               | 2011-2013                             | 10 - 54 years    | MMR         |
| India: Mahārāshtra, Rural    | India Vital Statistics                                                                                                                                                                            | Vital Registration |                                                                               | 1983-1984, 1986-1995                  | All Ages         | 2614645     |
| India: Mahārāshtra, Urban    | Road safety in India: Challenges and opportunities                                                                                                                                                | Police Records     | Mumbai                                                                        | 1996                                  | All Ages         | Death Rate  |
| India: Mahārāshtra, Urban    | India District Level Household Survey (DLHS)                                                                                                                                                      | Sibling history    |                                                                               | 2001, 2006                            | 10 - 54 years    | 304         |
| India: Mahārāshtra, Urban    | Demographic and Health Survey (DHS)                                                                                                                                                               | Survey/Census      |                                                                               | 1992, 1998                            | All Ages         | 476         |
| India: Mahārāshtra, Urban    | India SRS Maternal Mortality: Trends, Causes and Risk Factors 1997-2003                                                                                                                           | Verbal Autopsy     |                                                                               | 1999-2003                             | 10 - 54 years    | MMR         |
| India: Mahārāshtra, Urban    | India Study on Causes of Death by Verbal Autopsy 2003                                                                                                                                             | Verbal Autopsy     |                                                                               | 2003                                  | All Ages         | 626         |
| India: Mahārāshtra, Urban    | India SRS Maternal Mortality Tables 2001-2009                                                                                                                                                     | Verbal Autopsy     |                                                                               | 2004, 2006-2009                       | 10 - 54 years    | MMR         |
| India: Mahārāshtra, Urban    | India Sample Registration System (SRS)                                                                                                                                                            | Verbal Autopsy     |                                                                               | 2005, 2011                            | All Ages         | 10839       |
| India: Mahārāshtra, Urban    | Stillbirths and newborn deaths in slum settlements in Mumbai, India: a prospective verbal autopsy study                                                                                           | Verbal Autopsy     | 48 slum areas Mumbai [urban]                                                  | 2006                                  | birth - 27 days  | 116         |

**Appendix Table 6: Causes of death data source list by geography, source type, and study site, with years, age range, and sample size, excluding sources on lower respiratory infection and diarrhoea etiologies**

| Location                  | Source name                                                | Source type        | Site | Years                                 | Ages            | Sample size |
|---------------------------|------------------------------------------------------------|--------------------|------|---------------------------------------|-----------------|-------------|
| India: Mahārāshtra, Urban | India SRS Special Bulletin on Maternal Mortality 2010-2012 | Verbal Autopsy     |      | 2010                                  | 10 - 54 years   | MMR         |
| India: Mahārāshtra, Urban | India SRS Maternal Mortality Ratio Bulletin 2011-2013      | Verbal Autopsy     |      | 2011-2013                             | 10 - 54 years   | MMR         |
| India: Mahārāshtra, Urban | India Vital Statistics                                     | Vital Registration |      | 1980-1984, 1986-1995                  | All Ages        | 2656890     |
| India: Mahārāshtra, Urban | India Medical Certification of Cause of Death (MCCD)       | Vital Registration |      | 1990-2010                             | All Ages        | 3532297     |
| India: Manipur, Rural     | India District Level Household Survey (DLHS)               | Sibling history    |      | 2001, 2006                            | 10 - 54 years   | 130         |
| India: Manipur, Rural     | Demographic and Health Survey (DHS)                        | Survey/Census      |      | 1992, 1998                            | All Ages        | 183         |
| India: Manipur, Rural     | India Survey of Causes of Death (SCD)                      | Verbal Autopsy     |      | 1980-1998                             | All Ages        | 1111        |
| India: Manipur, Rural     | India Sample Registration System (SRS)                     | Verbal Autopsy     |      | 2005, 2011                            | All Ages        | 717         |
| India: Manipur, Rural     | India Vital Statistics                                     | Vital Registration |      | 1983-1984, 1986-1993, 1995            | All Ages        | 2239        |
| India: Manipur, Urban     | India District Level Household Survey (DLHS)               | Sibling history    |      | 2001, 2006                            | 10 - 54 years   | 32          |
| India: Manipur, Urban     | Demographic and Health Survey (DHS)                        | Survey/Census      |      | 1992, 1998                            | All Ages        | 93          |
| India: Manipur, Urban     | India Sample Registration System (SRS)                     | Verbal Autopsy     |      | 2005, 2011                            | All Ages        | 489         |
| India: Manipur, Urban     | India Vital Statistics                                     | Vital Registration |      | 1980-1984, 1986-1993, 1995            | All Ages        | 13995       |
| India: Manipur, Urban     | India Medical Certification of Cause of Death (MCCD)       | Vital Registration |      | 1990-2010                             | All Ages        | 35154       |
| India: Meghālaya, Rural   | India District Level Household Survey (DLHS)               | Sibling history    |      | 2001, 2006                            | 10 - 54 years   | 159         |
| India: Meghālaya, Rural   | Demographic and Health Survey (DHS)                        | Survey/Census      |      | 1992, 1998                            | All Ages        | 213         |
| India: Meghālaya, Rural   | India Survey of Causes of Death (SCD)                      | Verbal Autopsy     |      | 1980-1998                             | All Ages        | 3357        |
| India: Meghālaya, Rural   | India Sample Registration System (SRS)                     | Verbal Autopsy     |      | 2005, 2011                            | All Ages        | 577         |
| India: Meghālaya, Rural   | India Vital Statistics                                     | Vital Registration |      | 1983                                  | birth - 4 years | 20          |
| India: Meghālaya, Urban   | India District Level Household Survey (DLHS)               | Sibling history    |      | 2001, 2006                            | 10 - 54 years   | 25          |
| India: Meghālaya, Urban   | Demographic and Health Survey (DHS)                        | Survey/Census      |      | 1992, 1998                            | All Ages        | 51          |
| India: Meghālaya, Urban   | India Sample Registration System (SRS)                     | Verbal Autopsy     |      | 2005, 2011                            | All Ages        | 394         |
| India: Meghālaya, Urban   | India Vital Statistics                                     | Vital Registration |      | 1980-1984, 1986-1987, 1989            | All Ages        | 6123        |
| India: Meghālaya, Urban   | India Medical Certification of Cause of Death (MCCD)       | Vital Registration |      | 1990-2010                             | All Ages        | 41750       |
| India: Mizoram, Rural     | India District Level Household Survey (DLHS)               | Sibling history    |      | 2001, 2006                            | 10 - 54 years   | 95          |
| India: Mizoram, Rural     | Demographic and Health Survey (DHS)                        | Survey/Census      |      | 1992, 1998                            | All Ages        | 78          |
| India: Mizoram, Rural     | India Sample Registration System (SRS)                     | Verbal Autopsy     |      | 2005, 2011                            | All Ages        | 227         |
| India: Mizoram, Rural     | India Vital Statistics                                     | Vital Registration |      | 1988-1990                             | All Ages        | 4294        |
| India: Mizoram, Urban     | India District Level Household Survey (DLHS)               | Sibling history    |      | 2001, 2006                            | 10 - 54 years   | 36          |
| India: Mizoram, Urban     | Demographic and Health Survey (DHS)                        | Survey/Census      |      | 1992, 1998                            | All Ages        | 83          |
| India: Mizoram, Urban     | India Sample Registration System (SRS)                     | Verbal Autopsy     |      | 2005, 2011                            | All Ages        | 155         |
| India: Mizoram, Urban     | India Vital Statistics                                     | Vital Registration |      | 1980-1984, 1986-1990                  | All Ages        | 6735        |
| India: Mizoram, Urban     | India Medical Certification of Cause of Death (MCCD)       | Vital Registration |      | 1990-2010                             | All Ages        | 34361       |
| India: Nāgāland, Rural    | India District Level Household Survey (DLHS)               | Sibling history    |      | 2001                                  | 10 - 54 years   | 9           |
| India: Nāgāland, Rural    | Demographic and Health Survey (DHS)                        | Survey/Census      |      | 1992, 1998                            | All Ages        | 106         |
| India: Nāgāland, Rural    | India Survey of Causes of Death (SCD)                      | Verbal Autopsy     |      | 1980-1998                             | All Ages        | 1380        |
| India: Nāgāland, Rural    | India Sample Registration System (SRS)                     | Verbal Autopsy     |      | 2005, 2011                            | All Ages        | 366         |
| India: Nāgāland, Rural    | India Vital Statistics                                     | Vital Registration |      | 1983-1984, 1986, 1988-1989, 1991-1995 | All Ages        | 18997       |
| India: Nāgāland, Urban    | India District Level Household Survey (DLHS)               | Sibling history    |      | 2001                                  | 10 - 49 years   | 2           |
| India: Nāgāland, Urban    | Demographic and Health Survey (DHS)                        | Survey/Census      |      | 1992, 1998                            | All Ages        | 15          |

**Appendix Table 6: Causes of death data source list by geography, source type, and study site, with years, age range, and sample size, excluding sources on lower respiratory infection and diarrhoea etiologies**

| Location               | Source name                                                             | Source type        | Site                                                        | Years                           | Ages             | Sample size |
|------------------------|-------------------------------------------------------------------------|--------------------|-------------------------------------------------------------|---------------------------------|------------------|-------------|
| India: Nāgāland, Urban | India Sample Registration System (SRS)                                  | Verbal Autopsy     |                                                             | 2005, 2011                      | All Ages         | 250         |
| India: Nāgāland, Urban | India Vital Statistics                                                  | Vital Registration |                                                             | 1980-1984, 1986-1989, 1991-1995 | All Ages         | 8355        |
| India: Nāgāland, Urban | India Medical Certification of Cause of Death (MCCD)                    | Vital Registration |                                                             | 1990-2010                       | All Ages         | 5180        |
| India: Orissa, Rural   | India District Level Household Survey (DLHS)                            | Sibling history    |                                                             | 2001, 2006                      | 10 - 54 years    | 619         |
| India: Orissa, Rural   | Demographic and Health Survey (DHS)                                     | Survey/Census      |                                                             | 1992, 1998                      | All Ages         | 1026        |
| India: Orissa, Rural   | India Survey of Causes of Death (SCD)                                   | Verbal Autopsy     |                                                             | 1980-1998                       | All Ages         | 22640       |
| India: Orissa, Rural   | Validity of causes of infant death by verbal autopsy                    | Verbal Autopsy     | 16 clusters in districts Cuttack and Koraput Orissa [rural] | 1992                            | birth - 364 days | 56          |
| India: Orissa, Rural   | India SRS Maternal Mortality: Trends, Causes and Risk Factors 1997-2003 | Verbal Autopsy     |                                                             | 1999-2003                       | 10 - 54 years    | MMR         |
| India: Orissa, Rural   | India SRS Maternal Mortality Tables 2001-2009                           | Verbal Autopsy     |                                                             | 2004, 2006-2009                 | 10 - 54 years    | MMR         |
| India: Orissa, Rural   | India - Andhra Pradesh and Odisha Mortality Survey 2005-2006            | Verbal Autopsy     |                                                             | 2005                            | 15 years +       | 258520      |
| India: Orissa, Rural   | India Sample Registration System (SRS)                                  | Verbal Autopsy     |                                                             | 2005, 2011                      | All Ages         | 7514        |
| India: Orissa, Rural   | India Vital Statistics                                                  | Vital Registration |                                                             | 1986-1992, 1995                 | All Ages         | 1303997     |
| India: Orissa, Urban   | India District Level Household Survey (DLHS)                            | Sibling history    |                                                             | 2001, 2006                      | 10 - 54 years    | 102         |
| India: Orissa, Urban   | Demographic and Health Survey (DHS)                                     | Survey/Census      |                                                             | 1992, 1998                      | All Ages         | 213         |
| India: Orissa, Urban   | Validity of causes of infant death by verbal autopsy                    | Verbal Autopsy     | 7 clusters in districts Cuttack and Koraput Orissa [urban]  | 1992                            | birth - 364 days | 123         |
| India: Orissa, Urban   | India SRS Maternal Mortality: Trends, Causes and Risk Factors 1997-2003 | Verbal Autopsy     |                                                             | 1999-2003                       | 10 - 54 years    | MMR         |
| India: Orissa, Urban   | India SRS Maternal Mortality Tables 2001-2009                           | Verbal Autopsy     |                                                             | 2004, 2006-2009                 | 10 - 54 years    | MMR         |
| India: Orissa, Urban   | India - Andhra Pradesh and Odisha Mortality Survey 2005-2006            | Verbal Autopsy     |                                                             | 2005                            | 15 years +       | 23078       |
| India: Orissa, Urban   | India Sample Registration System (SRS)                                  | Verbal Autopsy     |                                                             | 2005, 2011                      | All Ages         | 5031        |
| India: Orissa, Urban   | India Vital Statistics                                                  | Vital Registration |                                                             | 1980-1984, 1986-1992, 1995      | All Ages         | 323259      |
| India: Orissa, Urban   | India Medical Certification of Cause of Death (MCCD)                    | Vital Registration |                                                             | 1990-2010                       | All Ages         | 477741      |
| India: Orissa, Urban   | India - Odisha Medical Certification of Cause of Death Data 2009        | Vital Registration |                                                             | 2009                            | All Ages         | 34752       |
| India: Orissa, Urban   | India - Odisha Medical Certification of Cause of Death Data 2010        | Vital Registration |                                                             | 2010                            | All Ages         | 34744       |
| India: Orissa, Urban   | India - Odisha Medical Certification of Cause of Death Data 2011        | Vital Registration |                                                             | 2011                            | All Ages         | 33968       |
| India: Orissa, Urban   | India - Odisha Medical Certification of Cause of Death Data 2012        | Vital Registration |                                                             | 2012                            | All Ages         | 32559       |
| India: Orissa, Urban   | India - Odisha Medical Certification of Cause of Death Data 2013        | Vital Registration |                                                             | 2013                            | All Ages         | 34165       |
| India: Punjab, Rural   | India District Level Household Survey (DLHS)                            | Sibling history    |                                                             | 2001, 2006                      | 10 - 54 years    | 273         |
| India: Punjab, Rural   | Demographic and Health Survey (DHS)                                     | Survey/Census      |                                                             | 1992, 1998                      | All Ages         | 457         |
| India: Punjab, Rural   | India Survey of Causes of Death (SCD)                                   | Verbal Autopsy     |                                                             | 1980-1998                       | All Ages         | 27000       |
| India: Punjab, Rural   | India SRS Maternal Mortality: Trends, Causes and Risk Factors 1997-2003 | Verbal Autopsy     |                                                             | 1999-2003                       | 10 - 54 years    | MMR         |
| India: Punjab, Rural   | India SRS Maternal Mortality Tables 2001-2009                           | Verbal Autopsy     |                                                             | 2004, 2006-2009                 | 10 - 54 years    | MMR         |
| India: Punjab, Rural   | India Sample Registration System (SRS)                                  | Verbal Autopsy     |                                                             | 2005, 2011                      | All Ages         | 7288        |
| India: Punjab, Rural   | India SRS Special Bulletin on Maternal Mortality 2010-2012              | Verbal Autopsy     |                                                             | 2010                            | 10 - 54 years    | MMR         |
| India: Punjab, Rural   | India SRS Maternal Mortality Ratio Bulletin 2011-2013                   | Verbal Autopsy     |                                                             | 2011-2013                       | 10 - 54 years    | MMR         |
| India: Punjab, Rural   | India Vital Statistics                                                  | Vital Registration |                                                             | 1983-1984, 1986-1988            | All Ages         | 411345      |

**Appendix Table 6: Causes of death data source list by geography, source type, and study site, with years, age range, and sample size, excluding sources on lower respiratory infection and diarrhoea etiologies**

| Location                | Source name                                                                                                                                          | Source type        | Site                                                                            | Years                | Ages          | Sample size |
|-------------------------|------------------------------------------------------------------------------------------------------------------------------------------------------|--------------------|---------------------------------------------------------------------------------|----------------------|---------------|-------------|
| India: Punjab, Urban    | India District Level Household Survey (DLHS)                                                                                                         | Sibling history    |                                                                                 | 2001, 2006           | 10 - 54 years | 115         |
| India: Punjab, Urban    | Demographic and Health Survey (DHS)                                                                                                                  | Survey/Census      |                                                                                 | 1992, 1998           | All Ages      | 207         |
| India: Punjab, Urban    | India SRS Maternal Mortality: Trends, Causes and Risk Factors 1997-2003                                                                              | Verbal Autopsy     |                                                                                 | 1999-2003            | 10 - 54 years | MMR         |
| India: Punjab, Urban    | India SRS Maternal Mortality Tables 2001-2009                                                                                                        | Verbal Autopsy     |                                                                                 | 2004, 2006-2009      | 10 - 54 years | MMR         |
| India: Punjab, Urban    | India Sample Registration System (SRS)                                                                                                               | Verbal Autopsy     |                                                                                 | 2005, 2011           | All Ages      | 4975        |
| India: Punjab, Urban    | India SRS Special Bulletin on Maternal Mortality 2010-2012                                                                                           | Verbal Autopsy     |                                                                                 | 2010                 | 10 - 54 years | MMR         |
| India: Punjab, Urban    | India SRS Maternal Mortality Ratio Bulletin 2011-2013                                                                                                | Verbal Autopsy     |                                                                                 | 2011-2013            | 10 - 54 years | MMR         |
| India: Punjab, Urban    | India Vital Statistics                                                                                                                               | Vital Registration |                                                                                 | 1980-1984, 1986-1989 | All Ages      | 167375      |
| India: Punjab, Urban    | India Medical Certification of Cause of Death (MCCD)                                                                                                 | Vital Registration |                                                                                 | 1990-2010            | All Ages      | 187363      |
| India: Rājasthān, Rural | India District Level Household Survey (DLHS)                                                                                                         | Sibling history    |                                                                                 | 2001, 2006           | 10 - 54 years | 569         |
| India: Rājasthān, Rural | Demographic and Health Survey (DHS)                                                                                                                  | Survey/Census      |                                                                                 | 1992, 1998           | All Ages      | 1433        |
| India: Rājasthān, Rural | India Survey of Causes of Death (SCD)                                                                                                                | Verbal Autopsy     |                                                                                 | 1980-1998            | All Ages      | 28891       |
| India: Rājasthān, Rural | India SRS Maternal Mortality: Trends, Causes and Risk Factors 1997-2003                                                                              | Verbal Autopsy     |                                                                                 | 1999-2003            | 10 - 54 years | MMR         |
| India: Rājasthān, Rural | Pregnancy-related deaths in rural Rajasthan, India: exploring causes, context, and care-seeking through verbal autopsy                               | Verbal Autopsy     | a block of southern Rajasthan [rural]                                           | 2002                 | 15 - 49 years | 156         |
| India: Rājasthān, Rural | India Study on Causes of Death by Verbal Autopsy 2003                                                                                                | Verbal Autopsy     |                                                                                 | 2003                 | All Ages      | 2480        |
| India: Rājasthān, Rural | Maternal mortality ratio and predictors of maternal deaths in selected desert districts in Rajasthan a community-based survey and case control study | Verbal Autopsy     | 411 villages in Rajasthan - districts of Bikaner - Barmer - Jaisalmer - Jodhpur | 2003                 | 15 - 49 years | MMR         |
| India: Rājasthān, Rural | India SRS Maternal Mortality Tables 2001-2009                                                                                                        | Verbal Autopsy     |                                                                                 | 2004, 2006-2009      | 10 - 54 years | MMR         |
| India: Rājasthān, Rural | India Sample Registration System (SRS)                                                                                                               | Verbal Autopsy     |                                                                                 | 2005, 2011           | All Ages      | 6199        |
| India: Rājasthān, Rural | India SRS Special Bulletin on Maternal Mortality 2010-2012                                                                                           | Verbal Autopsy     |                                                                                 | 2010                 | 10 - 54 years | MMR         |
| India: Rājasthān, Rural | India SRS Maternal Mortality Ratio Bulletin 2011-2013                                                                                                | Verbal Autopsy     |                                                                                 | 2011-2013            | 10 - 54 years | MMR         |
| India: Rājasthān, Rural | India Vital Statistics                                                                                                                               | Vital Registration |                                                                                 | 1983-1984, 1986-1993 | All Ages      | 599238      |
| India: Rājasthān, Urban | Road safety in India: Challenges and opportunities                                                                                                   | Police Records     | Kota                                                                            | 2007                 | All Ages      | Death Rate  |
| India: Rājasthān, Urban | India District Level Household Survey (DLHS)                                                                                                         | Sibling history    |                                                                                 | 2001, 2006           | 10 - 54 years | 143         |
| India: Rājasthān, Urban | Demographic and Health Survey (DHS)                                                                                                                  | Survey/Census      |                                                                                 | 1992, 1998           | All Ages      | 338         |
| India: Rājasthān, Urban | India SRS Maternal Mortality: Trends, Causes and Risk Factors 1997-2003                                                                              | Verbal Autopsy     |                                                                                 | 1999-2003            | 10 - 54 years | MMR         |
| India: Rājasthān, Urban | India Study on Causes of Death by Verbal Autopsy 2003                                                                                                | Verbal Autopsy     |                                                                                 | 2003                 | All Ages      | 660         |
| India: Rājasthān, Urban | India SRS Maternal Mortality Tables 2001-2009                                                                                                        | Verbal Autopsy     |                                                                                 | 2004, 2006-2009      | 10 - 54 years | MMR         |
| India: Rājasthān, Urban | India Sample Registration System (SRS)                                                                                                               | Verbal Autopsy     |                                                                                 | 2005, 2011           | All Ages      | 3924        |
| India: Rājasthān, Urban | India SRS Special Bulletin on Maternal Mortality 2010-2012                                                                                           | Verbal Autopsy     |                                                                                 | 2010                 | 10 - 54 years | MMR         |
| India: Rājasthān, Urban | India SRS Maternal Mortality Ratio Bulletin 2011-2013                                                                                                | Verbal Autopsy     |                                                                                 | 2011-2013            | 10 - 54 years | MMR         |
| India: Rājasthān, Urban | India Vital Statistics                                                                                                                               | Vital Registration |                                                                                 | 1980-1984, 1986-1993 | All Ages      | 423450      |
| India: Rājasthān, Urban | India Medical Certification of Cause of Death (MCCD)                                                                                                 | Vital Registration |                                                                                 | 1990-2010            | All Ages      | 475192      |
| India: Sikkim, Rural    | India District Level Household Survey (DLHS)                                                                                                         | Sibling history    |                                                                                 | 2001, 2006           | 10 - 54 years | 125         |
| India: Sikkim, Rural    | Demographic and Health Survey (DHS)                                                                                                                  | Survey/Census      |                                                                                 | 1998                 | All Ages      | 132         |
| India: Sikkim, Rural    | India Sample Registration System (SRS)                                                                                                               | Verbal Autopsy     |                                                                                 | 2005, 2011           | All Ages      | 117         |
| India: Sikkim, Urban    | India District Level Household Survey (DLHS)                                                                                                         | Sibling history    |                                                                                 | 2001                 | 25 - 54 years | 0           |



**Appendix Table 6: Causes of death data source list by geography, source type, and study site, with years, age range, and sample size, excluding sources on lower respiratory infection and diarrhoea etiologies**

| Location                 | Source name                                                                                              | Source type        | Site                                    | Years                      | Ages              | Sample size |
|--------------------------|----------------------------------------------------------------------------------------------------------|--------------------|-----------------------------------------|----------------------------|-------------------|-------------|
| India: Sikkim, Urban     | India District Level Household Survey (DLHS)                                                             | Sibling history    |                                         | 2006                       | 30 - 54 years     | 4           |
| India: Sikkim, Urban     | Demographic and Health Survey (DHS)                                                                      | Survey/Census      |                                         | 1998                       | All Ages          | 8           |
| India: Sikkim, Urban     | India Sample Registration System (SRS)                                                                   | Verbal Autopsy     |                                         | 2005, 2011                 | All Ages          | 80          |
| India: Sikkim, Urban     | India Vital Statistics                                                                                   | Vital Registration |                                         | 1980-1984, 1986-1987, 1989 | All Ages          | 2960        |
| India: Sikkim, Urban     | India Medical Certification of Cause of Death (MCCD)                                                     | Vital Registration |                                         | 1990-2010                  | All Ages          | 13858       |
| India: Tamil Nādu, Rural | India District Level Household Survey (DLHS)                                                             | Sibling history    |                                         | 2001, 2006                 | 10 - 54 years     | 2707        |
| India: Tamil Nādu, Rural | Demographic and Health Survey (DHS)                                                                      | Survey/Census      |                                         | 1992, 1998                 | All Ages          | 681         |
| India: Tamil Nādu, Rural | India Survey of Causes of Death (SCD)                                                                    | Verbal Autopsy     |                                         | 1980-1998                  | All Ages          | 31691       |
| India: Tamil Nādu, Rural | Suicides in young people in rural southern India                                                         | Verbal Autopsy     | Vellore [rural]                         | 1996                       | 10 - 19 years     | 427         |
| India: Tamil Nādu, Rural | India SRS Maternal Mortality: Trends, Causes and Risk Factors 1997-2003                                  | Verbal Autopsy     |                                         | 1999-2003                  | 10 - 54 years     | MMR         |
| India: Tamil Nādu, Rural | India Study on Causes of Death by Verbal Autopsy 2003                                                    | Verbal Autopsy     |                                         | 2003                       | All Ages          | 1703        |
| India: Tamil Nādu, Rural | India SRS Maternal Mortality Tables 2001-2009                                                            | Verbal Autopsy     |                                         | 2004, 2006-2009            | 10 - 54 years     | MMR         |
| India: Tamil Nādu, Rural | India Sample Registration System (SRS)                                                                   | Verbal Autopsy     |                                         | 2005, 2011                 | All Ages          | 16709       |
| India: Tamil Nādu, Rural | India SRS Special Bulletin on Maternal Mortality 2010-2012                                               | Verbal Autopsy     |                                         | 2010                       | 10 - 54 years     | MMR         |
| India: Tamil Nādu, Rural | India SRS Maternal Mortality Ratio Bulletin 2011-2013                                                    | Verbal Autopsy     |                                         | 2011-2013                  | 10 - 54 years     | MMR         |
| India: Tamil Nādu, Rural | India Vital Statistics                                                                                   | Vital Registration |                                         | 1983-1984, 1986-1993, 1995 | All Ages          | 1707490     |
| India: Tamil Nādu, Urban | India District Level Household Survey (DLHS)                                                             | Sibling history    |                                         | 2001, 2006                 | 10 - 54 years     | 949         |
| India: Tamil Nādu, Urban | Demographic and Health Survey (DHS)                                                                      | Survey/Census      |                                         | 1992, 1998                 | All Ages          | 318         |
| India: Tamil Nādu, Urban | Reduced mortality among children in southern India receiving a small weekly dose of vitamin A            | Verbal Autopsy     | Trichy Tamil Nadu [urban]               | 1988                       | 28 days - 4 years | 88          |
| India: Tamil Nādu, Urban | Verbal autopsy of 48 000 adult deaths attributable to medical causes in Chennai (formerly Madras), India | Verbal Autopsy     |                                         | 1996                       | 25 years +        | 47217       |
| India: Tamil Nādu, Urban | Infant mortality in an urban slum                                                                        | Verbal Autopsy     | Vellore [urban]                         | 1999                       | birth - 364 days  | 219         |
| India: Tamil Nādu, Urban | India SRS Maternal Mortality: Trends, Causes and Risk Factors 1997-2003                                  | Verbal Autopsy     |                                         | 1999-2003                  | 10 - 54 years     | MMR         |
| India: Tamil Nādu, Urban | India Study on Causes of Death by Verbal Autopsy 2003                                                    | Verbal Autopsy     |                                         | 2003                       | All Ages          | 645         |
| India: Tamil Nādu, Urban | India SRS Maternal Mortality Tables 2001-2009                                                            | Verbal Autopsy     |                                         | 2004, 2006-2009            | 10 - 54 years     | MMR         |
| India: Tamil Nādu, Urban | India Sample Registration System (SRS)                                                                   | Verbal Autopsy     |                                         | 2005, 2011                 | All Ages          | 11931       |
| India: Tamil Nādu, Urban | India SRS Special Bulletin on Maternal Mortality 2010-2012                                               | Verbal Autopsy     |                                         | 2010                       | 10 - 54 years     | MMR         |
| India: Tamil Nādu, Urban | India SRS Maternal Mortality Ratio Bulletin 2011-2013                                                    | Verbal Autopsy     |                                         | 2011-2013                  | 10 - 54 years     | MMR         |
| India: Tamil Nādu, Urban | India Vital Statistics                                                                                   | Vital Registration |                                         | 1980-1984, 1986-1993, 1995 | All Ages          | 1920695     |
| India: Tamil Nādu, Urban | India Medical Certification of Cause of Death (MCCD)                                                     | Vital Registration |                                         | 1990-2010                  | All Ages          | 1831846     |
| India: Telangana, Rural  | Incidence of suicides in three villages of Khammam district of South India                               | Verbal Autopsy     | Telangana RuralKhammam district [rural] | 2009                       | 15 years +        | 252         |
| India: Tripura, Rural    | India District Level Household Survey (DLHS)                                                             | Sibling history    |                                         | 2001, 2006                 | 10 - 54 years     | 72          |
| India: Tripura, Rural    | Demographic and Health Survey (DHS)                                                                      | Survey/Census      |                                         | 1992, 1998                 | All Ages          | 241         |
| India: Tripura, Rural    | India Survey of Causes of Death (SCD)                                                                    | Verbal Autopsy     |                                         | 1980-1998                  | All Ages          | 1796        |
| India: Tripura, Rural    | India Sample Registration System (SRS)                                                                   | Verbal Autopsy     |                                         | 2005, 2011                 | All Ages          | 972         |
| India: Tripura, Rural    | India Vital Statistics                                                                                   | Vital Registration |                                         | 1986, 1989, 1991           | All Ages          | 8149        |
| India: Tripura, Urban    | India District Level Household Survey (DLHS)                                                             | Sibling history    |                                         | 2001                       | 45 - 49 years     | 0           |
| India: Tripura, Urban    | India District Level Household Survey (DLHS)                                                             | Sibling history    |                                         | 2006                       | 15 - 54 years     | 5           |
| India: Tripura, Urban    | Demographic and Health Survey (DHS)                                                                      | Survey/Census      |                                         | 1992, 1998                 | All Ages          | 53          |



**Appendix Table 6: Causes of death data source list by geography, source type, and study site, with years, age range, and sample size, excluding sources on lower respiratory infection and diarrhoea etiologies**

| Location                    | Source name                                                                                                                                                             | Source type        | Site                                      | Years                            | Ages            | Sample size |
|-----------------------------|-------------------------------------------------------------------------------------------------------------------------------------------------------------------------|--------------------|-------------------------------------------|----------------------------------|-----------------|-------------|
| India: Tripura, Urban       | India Sample Registration System (SRS)                                                                                                                                  | Verbal Autopsy     |                                           | 2005, 2011                       | All Ages        | 662         |
| India: Tripura, Urban       | India Vital Statistics                                                                                                                                                  | Vital Registration |                                           | 1980-1984, 1986-1987, 1989, 1991 | All Ages        | 33051       |
| India: Tripura, Urban       | India Medical Certification of Cause of Death (MCCD)                                                                                                                    | Vital Registration |                                           | 1990-2010                        | All Ages        | 169080      |
| India: Uttar Pradesh, Rural | India District Level Household Survey (DLHS)                                                                                                                            | Sibling history    |                                           | 2001, 2006                       | 10 - 54 years   | 2401        |
| India: Uttar Pradesh, Rural | Demographic and Health Survey (DHS)                                                                                                                                     | Survey/Census      |                                           | 1992, 1998                       | All Ages        | 2779        |
| India: Uttar Pradesh, Rural | India Survey of Causes of Death (SCD)                                                                                                                                   | Verbal Autopsy     |                                           | 1980-1998                        | All Ages        | 65581       |
| India: Uttar Pradesh, Rural | Maternal mortality in seven districts of Uttar Pradesh - an ICMR task force study                                                                                       | Verbal Autopsy     | Uttar Pradesh Agra [rural]                | 1989                             | 15 - 49 years   | MMR         |
| India: Uttar Pradesh, Rural | Maternal mortality in seven districts of Uttar Pradesh - an ICMR task force study                                                                                       | Verbal Autopsy     | Uttar Pradesh Badaun [rural]              | 1989                             | 15 - 49 years   | MMR         |
| India: Uttar Pradesh, Rural | Maternal mortality in seven districts of Uttar Pradesh - an ICMR task force study                                                                                       | Verbal Autopsy     | Uttar Pradesh Basti [rural]               | 1989                             | 15 - 49 years   | MMR         |
| India: Uttar Pradesh, Rural | Maternal mortality in seven districts of Uttar Pradesh - an ICMR task force study                                                                                       | Verbal Autopsy     | Uttar Pradesh Farrukhabad [rural]         | 1989                             | 15 - 49 years   | MMR         |
| India: Uttar Pradesh, Rural | Maternal mortality in seven districts of Uttar Pradesh - an ICMR task force study                                                                                       | Verbal Autopsy     | Uttar Pradesh Ghaziabad [rural]           | 1989                             | 15 - 49 years   | MMR         |
| India: Uttar Pradesh, Rural | Maternal mortality in seven districts of Uttar Pradesh - an ICMR task force study                                                                                       | Verbal Autopsy     | Uttar Pradesh Gorakhpur [rural]           | 1989                             | 15 - 49 years   | MMR         |
| India: Uttar Pradesh, Rural | Maternal mortality in seven districts of Uttar Pradesh - an ICMR task force study                                                                                       | Verbal Autopsy     | Uttar Pradesh Varanasi [rural]            | 1989                             | 15 - 49 years   | MMR         |
| India: Uttar Pradesh, Rural | Determinants of childhood mortality                                                                                                                                     | Verbal Autopsy     | Aligarh [rural]                           | 2005                             | birth - 4 years | 56          |
| India: Uttar Pradesh, Rural | India Sample Registration System (SRS)                                                                                                                                  | Verbal Autopsy     |                                           | 2005, 2011                       | All Ages        | 20255       |
| India: Uttar Pradesh, Rural | Rates, timing and causes of neonatal deaths in rural India: implications for neonatal health programmes                                                                 | Verbal Autopsy     | Barabanki and Unnao Uttar Pradesh [rural] | 2006                             | birth - 27 days | 618         |
| India: Uttar Pradesh, Urban | India District Level Household Survey (DLHS)                                                                                                                            | Sibling history    |                                           | 2001, 2006                       | 10 - 54 years   | 559         |
| India: Uttar Pradesh, Urban | Demographic and Health Survey (DHS)                                                                                                                                     | Survey/Census      |                                           | 1992, 1998                       | All Ages        | 510         |
| India: Uttar Pradesh, Urban | Neonatal morbidity and mortality in ICDS Urban Slums                                                                                                                    | Verbal Autopsy     | Gorakhpur city [urban]                    | 1983                             | birth - 27 days | 50          |
| India: Uttar Pradesh, Urban | Mortality patterns in under six children in I.C.D.S. urban slum                                                                                                         | Verbal Autopsy     | Gorakhpur city [urban]                    | 1983                             | 1 - 4 years     | 205         |
| India: Uttar Pradesh, Urban | Perinatal mortality in urban slums in Lucknow                                                                                                                           | Verbal Autopsy     | Lucknow [urban]                           | 1992                             | birth - 6 days  | 57          |
| India: Uttar Pradesh, Urban | Cause-specific mortality in under fives in the urban slums of Lucknow, north India                                                                                      | Verbal Autopsy     | Lucknow [urban]                           | 1994                             | birth - 4 years | 1101        |
| India: Uttar Pradesh, Urban | Singh's verbal autopsy questionnaire for the assessment of causes of death, social autopsy, tobacco autopsy and dietary autopsy, based on medical records and interview | Verbal Autopsy     | Moradabad [urban]                         | 2000                             | 25 - 64 years   | 2222        |
| India: Uttar Pradesh, Urban | Determinants of childhood mortality                                                                                                                                     | Verbal Autopsy     | Aligarh [urban]                           | 2005                             | birth - 4 years | 26          |
| India: Uttar Pradesh, Urban | India Sample Registration System (SRS)                                                                                                                                  | Verbal Autopsy     |                                           | 2005, 2011                       | All Ages        | 12846       |
| India: Uttar Pradesh, Urban | Determinants of tetanus and sepsis among the last neonatal deaths at household level in a peri-urban area of India                                                      | Verbal Autopsy     | Kanpur [periurban]                        | 2008                             | birth - 27 days | 109         |
| India: Uttar Pradesh, Urban | India Vital Statistics                                                                                                                                                  | Vital Registration |                                           | 1980-1984, 1986-1987, 1989       | All Ages        | 13825       |
| India: Uttar Pradesh, Urban | India Medical Certification of Cause of Death (MCCD)                                                                                                                    | Vital Registration |                                           | 1990-2010                        | All Ages        | 45014       |
| India: Uttarakhand, Rural   | India District Level Household Survey (DLHS)                                                                                                                            | Sibling history    |                                           | 2001, 2006                       | 10 - 54 years   | 163         |
| India: Uttarakhand, Rural   | India Sample Registration System (SRS)                                                                                                                                  | Verbal Autopsy     |                                           | 2005, 2011                       | All Ages        | 2256        |
| India: Uttarakhand, Urban   | India District Level Household Survey (DLHS)                                                                                                                            | Sibling history    |                                           | 2001, 2006                       | 10 - 54 years   | 36          |
| India: Uttarakhand, Urban   | India Sample Registration System (SRS)                                                                                                                                  | Verbal Autopsy     |                                           | 2005, 2011                       | All Ages        | 1541        |
| India: Uttarakhand, Urban   | India Medical Certification of Cause of Death (MCCD)                                                                                                                    | Vital Registration |                                           | 1999-2010                        | All Ages        | 35701       |
| India: West Bengal, Rural   | India District Level Household Survey (DLHS)                                                                                                                            | Sibling history    |                                           | 2001, 2006                       | 10 - 54 years   | 482         |

**Appendix Table 6: Causes of death data source list by geography, source type, and study site, with years, age range, and sample size, excluding sources on lower respiratory infection and diarrhoea etiologies**

| Location                                | Source name                                                                                                                  | Source type        | Site                                                                        | Years                | Ages            | Sample size |
|-----------------------------------------|------------------------------------------------------------------------------------------------------------------------------|--------------------|-----------------------------------------------------------------------------|----------------------|-----------------|-------------|
| India: West Bengal, Rural               | Demographic and Health Survey (DHS)                                                                                          | Survey/Census      |                                                                             | 1992, 1998           | All Ages        | 761         |
| India: West Bengal, Rural               | India Survey of Causes of Death (SCD)                                                                                        | Verbal Autopsy     |                                                                             | 1980-1998            | All Ages        | 5252        |
| India: West Bengal, Rural               | India SRS Maternal Mortality: Trends, Causes and Risk Factors 1997-2003                                                      | Verbal Autopsy     |                                                                             | 1999-2003            | 10 - 54 years   | MMR         |
| India: West Bengal, Rural               | India SRS Maternal Mortality Tables 2001-2009                                                                                | Verbal Autopsy     |                                                                             | 2004, 2006-2009      | 10 - 54 years   | MMR         |
| India: West Bengal, Rural               | India Sample Registration System (SRS)                                                                                       | Verbal Autopsy     |                                                                             | 2005, 2011           | All Ages        | 12601       |
| India: West Bengal, Rural               | India SRS Special Bulletin on Maternal Mortality 2010-2012                                                                   | Verbal Autopsy     |                                                                             | 2010                 | 10 - 54 years   | MMR         |
| India: West Bengal, Rural               | India SRS Maternal Mortality Ratio Bulletin 2011-2013                                                                        | Verbal Autopsy     |                                                                             | 2011-2013            | 10 - 54 years   | MMR         |
| India: West Bengal, Urban               | India District Level Household Survey (DLHS)                                                                                 | Sibling history    |                                                                             | 2001, 2006           | 10 - 54 years   | 127         |
| India: West Bengal, Urban               | Demographic and Health Survey (DHS)                                                                                          | Survey/Census      |                                                                             | 1992, 1998           | All Ages        | 319         |
| India: West Bengal, Urban               | India SRS Maternal Mortality: Trends, Causes and Risk Factors 1997-2003                                                      | Verbal Autopsy     |                                                                             | 1999-2003            | 10 - 54 years   | MMR         |
| India: West Bengal, Urban               | Use of verbal autopsy to determine mortality patterns in an urban slum in Kolkata, India                                     | Verbal Autopsy     | Kolkata ward 29 and 30 [urban]                                              | 2003                 | All Ages        | 88465       |
| India: West Bengal, Urban               | India SRS Maternal Mortality Tables 2001-2009                                                                                | Verbal Autopsy     |                                                                             | 2004, 2006-2009      | 10 - 54 years   | MMR         |
| India: West Bengal, Urban               | India Sample Registration System (SRS)                                                                                       | Verbal Autopsy     |                                                                             | 2005, 2011           | All Ages        | 8435        |
| India: West Bengal, Urban               | India SRS Special Bulletin on Maternal Mortality 2010-2012                                                                   | Verbal Autopsy     |                                                                             | 2010                 | 10 - 54 years   | MMR         |
| India: West Bengal, Urban               | India SRS Maternal Mortality Ratio Bulletin 2011-2013                                                                        | Verbal Autopsy     |                                                                             | 2011-2013            | 10 - 54 years   | MMR         |
| India: West Bengal, Urban               | India Medical Certification of Cause of Death (MCCD)                                                                         | Vital Registration |                                                                             | 1999-2010            | All Ages        | 124617      |
| India: The Six Minor Territories, Rural | India District Level Household Survey (DLHS)                                                                                 | Sibling history    |                                                                             | 2001, 2006           | 10 - 54 years   | 63          |
| India: The Six Minor Territories, Rural | India Survey of Causes of Death (SCD)                                                                                        | Verbal Autopsy     |                                                                             | 1980-1998            | All Ages        | 5890        |
| India: The Six Minor Territories, Rural | India Vital Statistics                                                                                                       | Vital Registration |                                                                             | 1983-1984, 1986-1995 | All Ages        | 30705       |
| India: The Six Minor Territories, Urban | India District Level Household Survey (DLHS)                                                                                 | Sibling history    |                                                                             | 2001, 2006           | 15 - 54 years   | 64          |
| India: The Six Minor Territories, Urban | India Vital Statistics                                                                                                       | Vital Registration |                                                                             | 1980-1984, 1986-1995 | All Ages        | 89408       |
| India: The Six Minor Territories, Urban | India Medical Certification of Cause of Death (MCCD)                                                                         | Vital Registration |                                                                             | 1990-2010            | All Ages        | 139322      |
| Nepal                                   | United Nations Surveys on Crime Trends and the Operations of Criminal Justice Systems 1970-2006                              | Police Records     |                                                                             | 1980-1986            | All Ages        | Death Rate  |
| Nepal                                   | United Nations Office on Drugs and Crime Global Study on Homicide 2011                                                       | Police Records     | Nepal NSO                                                                   | 1997-2007, 2009      | All Ages        | Death Rate  |
| Nepal                                   | Nepal Demographic and Health Survey - Maternal Mortality Data                                                                | Sibling History    |                                                                             | 1992-2005            | 15 - 44 years   | 50          |
| Nepal                                   | Field test results of the motherhood method to measure maternal mortality                                                    | Sibling History    | Bara District                                                               | 2004                 | 15 - 49 years   | MMR         |
| Nepal                                   | Nepal Population and Housing Census 2011                                                                                     | Survey/Census      |                                                                             | 2011                 | 15 - 49 years   | 9654        |
| Nepal                                   | Impact of a pilot acute respiratory infection (ARI) control programme in a rural community of the hill region of Nepal       | Verbal Autopsy     | Talku Duncchaur Chhaimale in Kathmandu Valley [rural]                       | 1984                 | birth - 4 years | 64          |
| Nepal                                   | Reduction in total under-five mortality in western Nepal through community-based antimicrobial treatment of pneumonia        | Verbal Autopsy     | Jumla district [rural]                                                      | 1987                 | birth - 4 years | 2101        |
| Nepal                                   | A multicentre study of perinatal mortality in Nepal                                                                          | Verbal Autopsy     | Jumla district [rural]                                                      | 1989                 | birth - 27 days | 123         |
| Nepal                                   | A multicentre study of perinatal mortality in Nepal                                                                          | Verbal Autopsy     | Lalitpur district [rural]                                                   | 1989                 | birth - 27 days | 25          |
| Nepal                                   | Nepal Maternal Mortality and Morbidity Study 2008-2009                                                                       | Verbal Autopsy     | Kailali Rupandehi Okhaldhunga Surkhet Jumloa Baglung Rasuwa Sunsari [rural] | 1998, 2008           | 15 - 49 years   | 2137        |
| Nepal                                   | Evaluation of neonatal verbal autopsy using physician review versus algorithm-based cause-of-death assignment in rural Nepal | Verbal Autopsy     | Sarlahi district [rural]                                                    | 1999                 | birth - 27 days | 176         |

**Appendix Table 6: Causes of death data source list by geography, source type, and study site, with years, age range, and sample size, excluding sources on lower respiratory infection and diarrhoea etiologies**

| Location                 | Source name                                                                                                                                | Source type     | Site                                                                    | Years           | Ages              | Sample size |
|--------------------------|--------------------------------------------------------------------------------------------------------------------------------------------|-----------------|-------------------------------------------------------------------------|-----------------|-------------------|-------------|
| Nepal                    | Effect of daily zinc supplementation on child mortality in southern Nepal: a community-based, cluster randomised, placebo-controlled trial | Verbal Autopsy  | Sarlahi district [rural]                                                | 2003            | 28 days - 4 years | 333         |
| Nepal                    | Verbal autopsy to ascertain causes of neonatal deaths in a community setting: a study from Morang, Nepal                                   | Verbal Autopsy  | Morang district [rural]                                                 | 2005            | birth - 27 days   | 183         |
| Nepal                    | Demographic and Health Survey (DHS)                                                                                                        | Verbal Autopsy  | National                                                                | 2006            | birth - 4 years   | 474         |
| Nepal                    | Maternal and infant mortality in Mahottari district of Nepal                                                                               | Verbal Autopsy  | 11 VDCsin Mahottari District                                            | 2007            | 15 - 49 years     | MMR         |
| Pakistan                 | United Nations Surveys on Crime Trends and the Operations of Criminal Justice Systems 1970-2006                                            | Police Records  |                                                                         | 1980            | All Ages          | Death Rate  |
| Pakistan                 | United Nations Office on Drugs and Crime Global Study on Homicide 2011                                                                     | Police Records  | Pakistan NSO                                                            | 1996-2007, 2009 | All Ages          | Death Rate  |
| Pakistan                 | Maternal mortality in rural community: a challenge for achieving millennium development goal                                               | Surveillance    | Matiary - Sindh Province                                                | 2007            | 15 - 49 years     | MMR         |
| Pakistan                 | Pakistan Demographic Survey                                                                                                                | Survey/Census   | A10                                                                     | 1993-1994       | All Ages          | 3394        |
| Pakistan                 | World Health Survey (WHS)                                                                                                                  | Survey/Census   |                                                                         | 1997            | All Ages          | 20          |
| Pakistan                 | Early child health in Lahore, Pakistan: X. Mortality                                                                                       | Verbal Autopsy  | Lahore [periurban]                                                      | 1985            | birth - 364 days  | 58          |
| Pakistan                 | Early child health in Lahore, Pakistan: X. Mortality                                                                                       | Verbal Autopsy  | Lahore [rural]                                                          | 1985            | birth - 364 days  | 61          |
| Pakistan                 | Early child health in Lahore, Pakistan: X. Mortality                                                                                       | Verbal Autopsy  | Lahore [urban]                                                          | 1985            | birth - 364 days  | 76          |
| Pakistan                 | Acute respiratory infections in children: a case management intervention in Abbottabad District, Pakistan                                  | Verbal Autopsy  | Abbottabad district [rural]                                             | 1985-1986       | birth - 4 years   | 93          |
| Pakistan                 | Cause-specific child mortality in a mountainous community in Pakistan by verbal autopsy                                                    | Verbal Autopsy  | Oshikhandass [rural]                                                    | 1989            | birth - 4 years   | 54          |
| Pakistan                 | Maternal mortality in different Pakistani sites: ratios, clinical causes and determininants                                                | Verbal Autopsy  | Balochistan (Pishin Loralai Lasbela Khuzdar)                            | 1990            | 15 - 49 years     | MMR         |
| Pakistan                 | Time to focus child survival programmes on the newborn: assessment of levels and causes of infant mortality in rural Pakistan              | Verbal Autopsy  | Balochistan (Pishin Loralai Lasbela Khuzdar) [rural]                    | 1990            | birth - 364 days  | 522         |
| Pakistan                 | Maternal mortality in different Pakistani sites: ratios, clinical causes and determininants                                                | Verbal Autopsy  | Karachi [urban]                                                         | 1990            | 15 - 49 years     | MMR         |
| Pakistan                 | Maternal mortality in different Pakistani sites: ratios, clinical causes and determininants                                                | Verbal Autopsy  | North West Frontier Province (Abbottabad Mansehra) [rural]              | 1990            | 15 - 49 years     | MMR         |
| Pakistan                 | Time to focus child survival programmes on the newborn: assessment of levels and causes of infant mortality in rural Pakistan              | Verbal Autopsy  | North-West Frontier Province (Dera Ismail Khan Peshawar Hazara) [rural] | 1992            | birth - 364 days  | 398         |
| Pakistan                 | Time to focus child survival programmes on the newborn: assessment of levels and causes of infant mortality in rural Pakistan              | Verbal Autopsy  | Federally Administered Tribal Areas [rural]                             | 1994            | birth - 364 days  | 221         |
| Pakistan                 | Neonatal mortality, risk factors and causes: a prospective population-based cohort study in urban Pakistan                                 | Verbal Autopsy  | Latifabad                                                               | 2004            | All Ages          | 53          |
| Pakistan                 | Demographic and Health Survey (DHS)                                                                                                        | Verbal Autopsy  |                                                                         | 2006            | 10 - 49 years     | 1062        |
| Pakistan                 | Demographic and Health Survey (DHS)                                                                                                        | Verbal Autopsy  |                                                                         | 2006            | birth - 4 years   | 3100        |
| Pakistan                 | Incidence of pneumonia, bacteremia, and invasive pneumococcal disease in Pakistani children                                                | Verbal Autopsy  | Sindh near Karachi                                                      | 2007            | birth - 4 years   | 54          |
| Pakistan                 | To determine the probable causes of death in an urban slum community of Pakistan among adults 18 years and above by verbal autopsy         | Verbal Autopsy  | Nurpur Shahan Islamabad [urban]                                         | 2010            | 15 years +        | 300         |
| Angola                   | United Nations Office on Drugs and Crime Global Study on Homicide 2011                                                                     | Police Records  | Angola Interpol                                                         | 2004            | All Ages          | Death Rate  |
| Central African Republic | Demographic and Health Survey (DHS)                                                                                                        | Sibling History |                                                                         | 1980-1994       | 15 - 39 years     | 33          |
| Congo                    | Congo, Rep. Demographic and Health Survey - Maternal Mortality Data                                                                        | Sibling History |                                                                         | 1991-2011       | 15 - 39 years     | 31          |

**Appendix Table 6: Causes of death data source list by geography, source type, and study site, with years, age range, and sample size, excluding sources on lower respiratory infection and diarrhoea etiologies**

| Location                         | Source name                                                                                                                                     | Source type     | Site                                                          | Years                       | Ages              | Sample size |
|----------------------------------|-------------------------------------------------------------------------------------------------------------------------------------------------|-----------------|---------------------------------------------------------------|-----------------------------|-------------------|-------------|
| Congo                            | Mortality Data for Ebola Outbreaks 1994-2014                                                                                                    | Surveillance    |                                                               | 2005                        | All Ages          | CF          |
| Democratic Republic of the Congo | United Nations Office on Drugs and Crime Global Study on Homicide 2011                                                                          | Police Records  | Democratic Republic of the Congo UN-PKO                       | 2004-2007, 2009-2010        | All Ages          | Death Rate  |
| Democratic Republic of the Congo | Global Status Report on Road Safety 2009                                                                                                        | Police Records  |                                                               | 2007                        | All Ages          | Death Rate  |
| Democratic Republic of the Congo | Demographic and Health Survey (DHS)                                                                                                             | Sibling History |                                                               | 1993-2013                   | 15 - 39 years     | 29          |
| Democratic Republic of the Congo | Mortality Data for Ebola Outbreaks 1994-2014                                                                                                    | Surveillance    |                                                               | 1995, 2007-2008, 2012, 2014 | All Ages          | CF          |
| Democratic Republic of the Congo | Mortality in the Democratic Republic of Congo: a nationwide survey                                                                              | Survey/Census   | East                                                          | 2000                        | birth - 4 years   | 198         |
| Democratic Republic of the Congo | Mortality in the Democratic Republic of Congo: a nationwide survey                                                                              | Survey/Census   | West                                                          | 2000                        | birth - 4 years   | 104         |
| Democratic Republic of the Congo | Mortality in the Democratic Republic of Congo: a nationwide survey                                                                              | Survey/Census   | East                                                          | 2003                        | All Ages          | 3169        |
| Democratic Republic of the Congo | Mortality in the Democratic Republic of Congo: a nationwide survey                                                                              | Survey/Census   | West                                                          | 2003                        | All Ages          | 827         |
| Democratic Republic of the Congo | Etude de la mortalité globale et de la mortalité liée au paludisme dans le Kivu montagneux, Zaïre                                               | Verbal Autopsy  | Katana (Kivu Zaire) [rural]                                   | 1986                        | All Ages          | 1248        |
| Democratic Republic of the Congo | Influence of nutritional status on child mortality in rural Zaire                                                                               | Verbal Autopsy  | Bwamanda Health zone [rural]                                  | 1990                        | birth - 4 years   | 246         |
| Democratic Republic of the Congo | Incidence and duration of severe wasting in two African populations                                                                             | Verbal Autopsy  | Dwamanda [rural]                                              | 1990                        | 28 days - 4 years | 215         |
| Gabon                            | Gabon Demographic and Health Survey - Maternal Mortality Data                                                                                   | Sibling History |                                                               | 1986-2012                   | 15 - 39 years     | 5           |
| Burundi                          | United Nations Surveys on Crime Trends and the Operations of Criminal Justice Systems 1970-2006                                                 | Police Records  |                                                               | 1981-1982, 1984-1986        | All Ages          | Death Rate  |
| Burundi                          | Demographic and Health Survey (DHS)                                                                                                             | Sibling History |                                                               | 1996-2010                   | 15 - 54 years     | 310         |
| Burundi                          | Mortality and morbidity at young ages in a stable hyperendemic malaria region, community Nyanza-Lac, Imbo South, Burundi                        | Verbal Autopsy  | Nyanza-Lac district Imbo Sud [rural]                          | 1990                        | birth - 4 years   | 160         |
| Comoros                          | Global Status Report on Road Safety 2009                                                                                                        | Police Records  |                                                               | 2007                        | All Ages          | Death Rate  |
| Comoros                          | Demographic and Health Surveys                                                                                                                  | Sibling History |                                                               | 1998-2012                   | 15 - 34 years     | 12          |
| Djibouti                         | Pan Arab Project for Family Health (PAPFAM)                                                                                                     | Surveillance    |                                                               | 2003                        | 15 - 49 years     | 123         |
| Eritrea                          | Eritrea Demographic and Health Survey - Maternal Mortality Data                                                                                 | Sibling History |                                                               | 1981-1995                   | 15 - 39 years     | 20          |
| Ethiopia                         | United Nations Office on Drugs and Crime Global Study on Homicide 2011                                                                          | Police Records  | Ethiopia Interpol                                             | 2004                        | All Ages          | Death Rate  |
| Ethiopia                         | Global Status Report on Road Safety 2009                                                                                                        | Police Records  |                                                               | 2006                        | All Ages          | Death Rate  |
| Ethiopia                         | Ethiopia Demographic and Health Survey - Maternal Mortality Data                                                                                | Sibling History |                                                               | 1986-2010                   | 15 - 54 years     | 1099        |
| Ethiopia                         | High maternal mortality in rural south-west Ethiopia: estimate by using the sisterhood method                                                   | Sibling History | rural villages of Bonke in Gamo Gofa                          | 2011                        | 15 - 49 years     | 2552        |
| Ethiopia                         | Maternal mortality in Addis Ababa, Ethiopia                                                                                                     | Survey/Census   | Addis Ababa [urban]                                           | 1982                        | 15 - 49 years     | MMR         |
| Ethiopia                         | World Health Survey (WHS)                                                                                                                       | Survey/Census   |                                                               | 1997                        | All Ages          | 5           |
| Ethiopia                         | Ethiopia Population and Housing Census 2007                                                                                                     | Survey/Census   |                                                               | 2007                        | 10 - 49 years     | 108296      |
| Ethiopia                         | The Butajira rural health project in Ethiopia: mortality pattern of the under fives                                                             | Verbal Autopsy  | Southern Shoa Administrative region Butajira district [rural] | 1987                        | birth - 4 years   | 646         |
| Ethiopia                         | Community based study on maternal mortality in Jimma town, south western Ethiopia                                                               | Verbal Autopsy  | Jimma Town                                                    | 1990                        | 15 - 49 years     | 100         |
| Ethiopia                         | Patterns of childhood mortality in three districts of north Gondar Administrative Zone. A community based study using the verbal autopsy method | Verbal Autopsy  | Three Woredas of North Gondar [mixed]                         | 1992                        | birth - 4 years   | 368         |

**Appendix Table 6: Causes of death data source list by geography, source type, and study site, with years, age range, and sample size, excluding sources on lower respiratory infection and diarrhoea etiologies**

| Location               | Source name                                                                                                                                                                     | Source type     | Site                                                 | Years           | Ages             | Sample size |
|------------------------|---------------------------------------------------------------------------------------------------------------------------------------------------------------------------------|-----------------|------------------------------------------------------|-----------------|------------------|-------------|
| Ethiopia               | The use of simplified verbal autopsy in identifying causes of adult death in a predominantly rural population in Ethiopia                                                       | Verbal Autopsy  | Meskan and Mareko Butajira (BRPH-DSS) [rural]        | 1997            | 15 - 49 years    | 515         |
| Ethiopia               | Demographic Surveillance System (DSS)                                                                                                                                           | Verbal Autopsy  | Butajira                                             | 2000            | All Ages         | 200         |
| Ethiopia               | La vigilancia de entierros detectó una reducción significativa en las muertes relacionadas con el VIH en Addis Ababa, Etiopía                                                   | Verbal Autopsy  | Addis Ababa [urban]                                  | 2001, 2003      | 10 years +       | 990         |
| Ethiopia               | Determinants of under-five mortality in Gilgel Gibe Field Research Center, Southwest Ethiopia                                                                                   | Verbal Autopsy  | Gilgel Gibe Field Research Center Southwest Ethiopia | 2004            | birth - 4 years  | 168         |
| Ethiopia               | Ethiopia - Deployment of artemetherlumefantrine with rapid diagnostic tests at community level, Raya Valley, Tigray, Ethiopia                                                   | Verbal Autopsy  | Alamata                                              | 2006            | All Ages         | 991         |
| Ethiopia               | Ethiopia - Deployment of artemetherlumefantrine with rapid diagnostic tests at community level, Raya Valley, Tigray, Ethiopia                                                   | Verbal Autopsy  | Rata Azebo                                           | 2006            | All Ages         | 1106        |
| Ethiopia               | Ethiopia - Addis Ababa Mortality Surveillance Program Data 2006-2009                                                                                                            | Verbal Autopsy  | Addis Ababa [Urban]                                  | 2006-2009       | 10 years +       | 3708        |
| Ethiopia               | Factors associated with place of death in Addis Ababa, Ethiopia                                                                                                                 | Verbal Autopsy  | Addis Ababa [urban]                                  | 2008            | 15 years +       | 4776        |
| Ethiopia               | Maternal and Neonatal Mortality in South-West Ethiopia: Estimates and Socio-Economic Inequality                                                                                 | Verbal Autopsy  | Gamo Gofa [rural]                                    | 2010            | 15 - 44 years    | 220         |
| Ethiopia               | Emerging chronic non-communicable diseases in rural communities of Northern Ethiopia: evidence using population-based verbal autopsy method in Kilite Awlaelo surveillance site | Verbal Autopsy  | Kilite Awlaelo Surveillance Site [rural]             | 2010            | All Ages         | 403         |
| Ethiopia               | Demographic Surveillance System (DSS)                                                                                                                                           | Verbal Autopsy  |                                                      | 2010-2011       | All Ages         | 559         |
| Ethiopia               | Determinants and Causes of Neonatal Mortality in Jimma Zone, Southwest Ethiopia: A Multilevel Analysis of Prospective Follow Up Study                                           | Verbal Autopsy  | Jimma Zone []                                        | 2012            | birth - 364 days | 99          |
| Kenya: Baringo         | Kenya Demographic and Health Survey - Maternal Mortality Data                                                                                                                   | Sibling History |                                                      | 1996            | 15 - 19 years    | 1           |
| Kenya: Baringo         | Kenya Demographic and Health Survey - Maternal Mortality Data                                                                                                                   | Sibling History |                                                      | 2002-2003       | 50 - 54 years    | 2           |
| Kenya: Baringo         | Kenya Demographic and Health Survey - Maternal Mortality Data                                                                                                                   | Sibling History |                                                      | 2005            | 35 - 39 years    | 1           |
| Kenya: Baringo         | Kenya Population and Housing Census 2009                                                                                                                                        | Survey/Census   |                                                      | 2009            | All Ages         | 176         |
| Kenya: Bomet           | Kenya Demographic and Health Survey - Maternal Mortality Data                                                                                                                   | Sibling History |                                                      | 1989, 1993-2003 | 30 - 34 years    | 3           |
| Kenya: Bomet           | Kenya Demographic and Health Survey - Maternal Mortality Data                                                                                                                   | Sibling History |                                                      | 2006-2008       | 20 - 39 years    | 6           |
| Kenya: Bomet           | Kenya Population and Housing Census 2009                                                                                                                                        | Survey/Census   |                                                      | 2009            | All Ages         | 256         |
| Kenya: Bungoma         | Kenya Demographic and Health Survey - Maternal Mortality Data                                                                                                                   | Sibling History |                                                      | 1985-2008       | 25 - 49 years    | 2           |
| Kenya: Bungoma         | Kenya Population and Housing Census 2009                                                                                                                                        | Survey/Census   |                                                      | 2009            | All Ages         | 401         |
| Kenya: Busia           | Kenya Demographic and Health Survey - Maternal Mortality Data                                                                                                                   | Sibling History |                                                      | 1984-1985, 1987 | 15 - 19 years    | 2           |
| Kenya: Busia           | Kenya Demographic and Health Survey - Maternal Mortality Data                                                                                                                   | Sibling History |                                                      | 1991-2008       | 25 - 34 years    | 5           |
| Kenya: Busia           | Kenya Population and Housing Census 2009                                                                                                                                        | Survey/Census   |                                                      | 2009            | All Ages         | 263         |
| Kenya: Elgeyo-Marakwet | Kenya Demographic and Health Survey - Maternal Mortality Data                                                                                                                   | Sibling History |                                                      | 1987            | 30 - 34 years    | 1           |
| Kenya: Elgeyo-Marakwet | Kenya Demographic and Health Survey - Maternal Mortality Data                                                                                                                   | Sibling History |                                                      | 1992            | 15 - 19 years    | 3           |

**Appendix Table 6: Causes of death data source list by geography, source type, and study site, with years, age range, and sample size, excluding sources on lower respiratory infection and diarrhoea etiologies**

| Location               | Source name                                                   | Source type     | Site | Years           | Ages          | Sample size |
|------------------------|---------------------------------------------------------------|-----------------|------|-----------------|---------------|-------------|
| Kenya: Elgeyo-Marakwet | Kenya Demographic and Health Survey - Maternal Mortality Data | Sibling History |      | 1997-2001, 2005 | 35 - 39 years | 2           |
| Kenya: Elgeyo-Marakwet | Kenya Demographic and Health Survey - Maternal Mortality Data | Sibling History |      | 2007            | 20 - 44 years | 2           |
| Kenya: Elgeyo-Marakwet | Kenya Population and Housing Census 2009                      | Survey/Census   |      | 2009            | All Ages      | 89          |
| Kenya: Embu            | Kenya Demographic and Health Survey - Maternal Mortality Data | Sibling History |      | 1989            | 15 - 19 years | 2           |
| Kenya: Embu            | Kenya Demographic and Health Survey - Maternal Mortality Data | Sibling History |      | 1993-2005       | 30 - 34 years | 7           |
| Kenya: Embu            | Kenya Demographic and Health Survey - Maternal Mortality Data | Sibling History |      | 2007            | 20 - 49 years | 2           |
| Kenya: Embu            | Kenya Population and Housing Census 2009                      | Survey/Census   |      | 2009            | All Ages      | 131         |
| Kenya: Garissa         | Kenya Demographic and Health Survey - Maternal Mortality Data | Sibling History |      | 1989-1990       | 25 - 44 years | 4           |
| Kenya: Garissa         | Kenya Demographic and Health Survey - Maternal Mortality Data | Sibling History |      | 1992-2004       | 15 - 24 years | 2           |
| Kenya: Garissa         | Kenya Demographic and Health Survey - Maternal Mortality Data | Sibling History |      | 2007-2008       | 40 - 44 years | 1           |
| Kenya: Garissa         | Kenya Population and Housing Census 2009                      | Survey/Census   |      | 2009            | All Ages      | 215         |
| Kenya: HomaBay         | Kenya Demographic and Health Survey - Maternal Mortality Data | Sibling History |      | 1990            | 20 - 24 years | 1           |
| Kenya: HomaBay         | Kenya Demographic and Health Survey - Maternal Mortality Data | Sibling History |      | 1993-1995       | 45 - 49 years | 1           |
| Kenya: HomaBay         | Kenya Demographic and Health Survey - Maternal Mortality Data | Sibling History |      | 1997-2008       | 15 - 39 years | 5           |
| Kenya: HomaBay         | Kenya Population and Housing Census 2009                      | Survey/Census   |      | 2009            | All Ages      | 499         |
| Kenya: Isiolo          | Kenya Demographic and Health Survey - Maternal Mortality Data | Sibling History |      | 1998-2001       | 25 - 49 years | 2           |
| Kenya: Isiolo          | Kenya Demographic and Health Survey - Maternal Mortality Data | Sibling History |      | 2003            | 40 - 44 years | 1           |
| Kenya: Isiolo          | Kenya Demographic and Health Survey - Maternal Mortality Data | Sibling History |      | 2006-2008       | 40 - 49 years | 2           |
| Kenya: Isiolo          | Kenya Population and Housing Census 2009                      | Survey/Census   |      | 2009            | All Ages      | 38          |
| Kenya: Kajiado         | Kenya Demographic and Health Survey - Maternal Mortality Data | Sibling History |      | 1985            | 15 - 19 years | 1           |
| Kenya: Kajiado         | Kenya Demographic and Health Survey - Maternal Mortality Data | Sibling History |      | 1991, 1993      | 30 - 34 years | 3           |
| Kenya: Kajiado         | Kenya Demographic and Health Survey - Maternal Mortality Data | Sibling History |      | 1996-2006       | 25 - 29 years | 2           |
| Kenya: Kajiado         | Kenya Population and Housing Census 2009                      | Survey/Census   |      | 2009            | All Ages      | 185         |
| Kenya: Kakamega        | Kenya Demographic and Health Survey - Maternal Mortality Data | Sibling History |      | 1984-1985       | 25 - 29 years | 4           |
| Kenya: Kakamega        | Kenya Demographic and Health Survey - Maternal Mortality Data | Sibling History |      | 1987-2008       | 15 - 39 years | 6           |
| Kenya: Kakamega        | Kenya Population and Housing Census 2009                      | Survey/Census   |      | 2009            | All Ages      | 540         |
| Kenya: Kericho         | Kenya Demographic and Health Survey - Maternal Mortality Data | Sibling History |      | 1984-1986       | 20 - 54 years | 2           |
| Kenya: Kericho         | Kenya Demographic and Health Survey - Maternal Mortality Data | Sibling History |      | 1989-2001       | 15 - 59 years | 5           |
| Kenya: Kericho         | Kenya Demographic and Health Survey - Maternal Mortality Data | Sibling History |      | 2003-2006       | 30 - 34 years | 7           |
| Kenya: Kericho         | Kenya Demographic and Health Survey - Maternal Mortality Data | Sibling History |      | 2008            | 45 - 49 years | 1           |

**Appendix Table 6: Causes of death data source list by geography, source type, and study site, with years, age range, and sample size, excluding sources on lower respiratory infection and diarrhoea etiologies**

| Location         | Source name                                                             | Source type     | Site                  | Years     | Ages            | Sample size |
|------------------|-------------------------------------------------------------------------|-----------------|-----------------------|-----------|-----------------|-------------|
| Kenya: Kericho   | Kenya Population and Housing Census 2009                                | Survey/Census   |                       | 2009      | All Ages        | 173         |
| Kenya: Kericho   | The burden of malaria mortality among African children in the year 2000 | Verbal Autopsy  | Brookebond Tea Estate | 1997      | birth - 4 years | 325         |
| Kenya: Kiambu    | Kenya Demographic and Health Survey - Maternal Mortality Data           | Sibling History |                       | 1987      | 40 - 44 years   | 3           |
| Kenya: Kiambu    | Kenya Demographic and Health Survey - Maternal Mortality Data           | Sibling History |                       | 1990      | 20 - 39 years   | 12          |
| Kenya: Kiambu    | Kenya Demographic and Health Survey - Maternal Mortality Data           | Sibling History |                       | 1992-2008 | 35 - 39 years   | 4           |
| Kenya: Kiambu    | Kenya Population and Housing Census 2009                                | Survey/Census   |                       | 2009      | All Ages        | 397         |
| Kenya: Kilifi    | Kenya Demographic and Health Survey - Maternal Mortality Data           | Sibling History |                       | 1987-1989 | 15 - 19 years   | 1           |
| Kenya: Kilifi    | Kenya Demographic and Health Survey - Maternal Mortality Data           | Sibling History |                       | 1991-2004 | 15 - 49 years   | 18          |
| Kenya: Kilifi    | Kenya Demographic and Health Survey - Maternal Mortality Data           | Sibling History |                       | 2006-2008 | 20 - 39 years   | 5           |
| Kenya: Kilifi    | Kenya Population and Housing Census 2009                                | Survey/Census   |                       | 2009      | All Ages        | 291         |
| Kenya: Kilifi    | Demographic Surveillance System (DSS)                                   | Verbal Autopsy  |                       | 2008-2011 | All Ages        | 4448        |
| Kenya: Kirinyaga | Kenya Demographic and Health Survey - Maternal Mortality Data           | Sibling History |                       | 1989      | 25 - 29 years   | 1           |
| Kenya: Kirinyaga | Kenya Demographic and Health Survey - Maternal Mortality Data           | Sibling History |                       | 1991-1993 | 20 - 24 years   | 2           |
| Kenya: Kirinyaga | Kenya Demographic and Health Survey - Maternal Mortality Data           | Sibling History |                       | 1995-2008 | 30 - 39 years   | 5           |
| Kenya: Kirinyaga | Kenya Population and Housing Census 2009                                | Survey/Census   |                       | 2009      | All Ages        | 170         |
| Kenya: Kisii     | Kenya Demographic and Health Survey - Maternal Mortality Data           | Sibling History |                       | 1984-2008 | 15 - 44 years   | 27          |
| Kenya: Kisii     | Kenya Population and Housing Census 2009                                | Survey/Census   |                       | 2009      | All Ages        | 371         |
| Kenya: Kisumu    | Kenya Demographic and Health Survey - Maternal Mortality Data           | Sibling History |                       | 1984      | 20 - 24 years   | 2           |
| Kenya: Kisumu    | Kenya Demographic and Health Survey - Maternal Mortality Data           | Sibling History |                       | 1986-1987 | 15 - 34 years   | 9           |
| Kenya: Kisumu    | Kenya Demographic and Health Survey - Maternal Mortality Data           | Sibling History |                       | 1989-2008 | 30 - 34 years   | 1           |
| Kenya: Kisumu    | Kenya Population and Housing Census 2009                                | Survey/Census   |                       | 2009      | All Ages        | 534         |
| Kenya: Kisumu    | Demographic Surveillance System (DSS)                                   | Verbal Autopsy  |                       | 2002-2010 | birth - 4 years | 935         |
| Kenya: Kitui     | Kenya Demographic and Health Survey - Maternal Mortality Data           | Sibling History |                       | 1990      | 30 - 34 years   | 1           |
| Kenya: Kitui     | Kenya Demographic and Health Survey - Maternal Mortality Data           | Sibling History |                       | 1992-2004 | 15 - 19 years   | 1           |
| Kenya: Kitui     | Kenya Demographic and Health Survey - Maternal Mortality Data           | Sibling History |                       | 2006-2007 | 35 - 39 years   | 1           |
| Kenya: Kitui     | Kenya Population and Housing Census 2009                                | Survey/Census   |                       | 2009      | All Ages        | 333         |
| Kenya: Kwale     | Kenya Demographic and Health Survey - Maternal Mortality Data           | Sibling History |                       | 1984      | 15 - 19 years   | 4           |
| Kenya: Kwale     | Kenya Demographic and Health Survey - Maternal Mortality Data           | Sibling History |                       | 1987      | 40 - 44 years   | 1           |
| Kenya: Kwale     | Kenya Demographic and Health Survey - Maternal Mortality Data           | Sibling History |                       | 1990-1992 | 25 - 29 years   | 1           |
| Kenya: Kwale     | Kenya Demographic and Health Survey - Maternal Mortality Data           | Sibling History |                       | 1994-2007 | 15 - 34 years   | 10          |
| Kenya: Kwale     | Kenya Population and Housing Census 2009                                | Survey/Census   |                       | 2009      | All Ages        | 170         |

**Appendix Table 6: Causes of death data source list by geography, source type, and study site, with years, age range, and sample size, excluding sources on lower respiratory infection and diarrhoea etiologies**

| Location        | Source name                                                   | Source type     | Site | Years     | Ages          | Sample size |
|-----------------|---------------------------------------------------------------|-----------------|------|-----------|---------------|-------------|
| Kenya: Laikipia | Kenya Demographic and Health Survey - Maternal Mortality Data | Sibling History |      | 1989      | 20 - 24 years | 1           |
| Kenya: Laikipia | Kenya Demographic and Health Survey - Maternal Mortality Data | Sibling History |      | 1992-1994 | 20 - 39 years | 2           |
| Kenya: Laikipia | Kenya Demographic and Health Survey - Maternal Mortality Data | Sibling History |      | 1997      | 15 - 44 years | 2           |
| Kenya: Laikipia | Kenya Demographic and Health Survey - Maternal Mortality Data | Sibling History |      | 1999      | 15 - 19 years | 2           |
| Kenya: Laikipia | Kenya Demographic and Health Survey - Maternal Mortality Data | Sibling History |      | 2002-2006 | 40 - 44 years | 2           |
| Kenya: Laikipia | Kenya Population and Housing Census 2009                      | Survey/Census   |      | 2009      | All Ages      | 112         |
| Kenya: Lamu     | Kenya Demographic and Health Survey - Maternal Mortality Data | Sibling History |      | 1994      | 25 - 29 years | 3           |
| Kenya: Lamu     | Kenya Demographic and Health Survey - Maternal Mortality Data | Sibling History |      | 1997-1998 | 25 - 39 years | 2           |
| Kenya: Lamu     | Kenya Demographic and Health Survey - Maternal Mortality Data | Sibling History |      | 2001-2005 | 35 - 39 years | 2           |
| Kenya: Lamu     | Kenya Demographic and Health Survey - Maternal Mortality Data | Sibling History |      | 2007      | 20 - 24 years | 2           |
| Kenya: Lamu     | Kenya Population and Housing Census 2009                      | Survey/Census   |      | 2009      | All Ages      | 26          |
| Kenya: Machakos | Kenya Demographic and Health Survey - Maternal Mortality Data | Sibling History |      | 1984-1985 | 25 - 29 years | 1           |
| Kenya: Machakos | Kenya Demographic and Health Survey - Maternal Mortality Data | Sibling History |      | 1987-1999 | 15 - 34 years | 4           |
| Kenya: Machakos | Kenya Demographic and Health Survey - Maternal Mortality Data | Sibling History |      | 2001-2007 | 15 - 44 years | 16          |
| Kenya: Machakos | Kenya Population and Housing Census 2009                      | Survey/Census   |      | 2009      | All Ages      | 383         |
| Kenya: Makueni  | Kenya Demographic and Health Survey - Maternal Mortality Data | Sibling History |      | 1989      | 35 - 39 years | 2           |
| Kenya: Makueni  | Kenya Demographic and Health Survey - Maternal Mortality Data | Sibling History |      | 1991      | 25 - 29 years | 1           |
| Kenya: Makueni  | Kenya Demographic and Health Survey - Maternal Mortality Data | Sibling History |      | 1993      | 15 - 19 years | 1           |
| Kenya: Makueni  | Kenya Demographic and Health Survey - Maternal Mortality Data | Sibling History |      | 1997-2002 | 15 - 29 years | 3           |
| Kenya: Makueni  | Kenya Demographic and Health Survey - Maternal Mortality Data | Sibling History |      | 2006-2008 | 30 - 34 years | 1           |
| Kenya: Makueni  | Kenya Population and Housing Census 2009                      | Survey/Census   |      | 2009      | All Ages      | 288         |
| Kenya: Mandera  | Kenya Demographic and Health Survey - Maternal Mortality Data | Sibling History |      | 1990      | 30 - 34 years | 1           |
| Kenya: Mandera  | Kenya Demographic and Health Survey - Maternal Mortality Data | Sibling History |      | 1996      | 15 - 29 years | 2           |
| Kenya: Mandera  | Kenya Demographic and Health Survey - Maternal Mortality Data | Sibling History |      | 1998-2008 | 25 - 39 years | 6           |
| Kenya: Mandera  | Kenya Population and Housing Census 2009                      | Survey/Census   |      | 2009      | All Ages      | 460         |
| Kenya: Marsabit | Kenya Demographic and Health Survey - Maternal Mortality Data | Sibling History |      | 1991      | 30 - 34 years | 1           |
| Kenya: Marsabit | Kenya Demographic and Health Survey - Maternal Mortality Data | Sibling History |      | 2000      | 20 - 34 years | 2           |
| Kenya: Marsabit | Kenya Demographic and Health Survey - Maternal Mortality Data | Sibling History |      | 2002      | 25 - 29 years | 1           |
| Kenya: Marsabit | Kenya Demographic and Health Survey - Maternal Mortality Data | Sibling History |      | 2005-2006 | 20 - 24 years | 1           |



**Appendix Table 6: Causes of death data source list by geography, source type, and study site, with years, age range, and sample size, excluding sources on lower respiratory infection and diarrhoea etiologies**

| Location        | Source name                                                                                                                                          | Source type     | Site                                                  | Years           | Ages            | Sample size |
|-----------------|------------------------------------------------------------------------------------------------------------------------------------------------------|-----------------|-------------------------------------------------------|-----------------|-----------------|-------------|
| Kenya: Marsabit | Kenya Demographic and Health Survey - Maternal Mortality Data                                                                                        | Sibling History |                                                       | 2008            | 15 - 19 years   | 1           |
| Kenya: Marsabit | Kenya Population and Housing Census 2009                                                                                                             | Survey/Census   |                                                       | 2009            | All Ages        | 91          |
| Kenya: Meru     | Kenya Demographic and Health Survey - Maternal Mortality Data                                                                                        | Sibling History |                                                       | 1985            | 15 - 29 years   | 5           |
| Kenya: Meru     | Kenya Demographic and Health Survey - Maternal Mortality Data                                                                                        | Sibling History |                                                       | 1987-2008       | 20 - 24 years   | 7           |
| Kenya: Meru     | Kenya Population and Housing Census 2009                                                                                                             | Survey/Census   |                                                       | 2009            | All Ages        | 382         |
| Kenya: Migori   | Kenya Demographic and Health Survey - Maternal Mortality Data                                                                                        | Sibling History |                                                       | 1989            | 15 - 29 years   | 7           |
| Kenya: Migori   | Kenya Demographic and Health Survey - Maternal Mortality Data                                                                                        | Sibling History |                                                       | 1991-1992       | 25 - 29 years   | 1           |
| Kenya: Migori   | Kenya Demographic and Health Survey - Maternal Mortality Data                                                                                        | Sibling History |                                                       | 1994-2008       | 25 - 34 years   | 2           |
| Kenya: Migori   | Kenya Population and Housing Census 2009                                                                                                             | Survey/Census   |                                                       | 2009            | All Ages        | 551         |
| Kenya: Mombasa  | Kenya Demographic and Health Survey - Maternal Mortality Data                                                                                        | Sibling History |                                                       | 1986-1987       | 15 - 39 years   | 19          |
| Kenya: Mombasa  | Kenya Demographic and Health Survey - Maternal Mortality Data                                                                                        | Sibling History |                                                       | 1989            | 20 - 54 years   | 3           |
| Kenya: Mombasa  | Kenya Demographic and Health Survey - Maternal Mortality Data                                                                                        | Sibling History |                                                       | 1991-2003       | 20 - 29 years   | 2           |
| Kenya: Mombasa  | Kenya Demographic and Health Survey - Maternal Mortality Data                                                                                        | Sibling History |                                                       | 2005-2007       | 35 - 59 years   | 3           |
| Kenya: Mombasa  | Kenya Population and Housing Census 2009                                                                                                             | Survey/Census   |                                                       | 2009            | All Ages        | 248         |
| Kenya: Murang'a | Kenya Demographic and Health Survey - Maternal Mortality Data                                                                                        | Sibling History |                                                       | 1984-1987       | 20 - 24 years   | 1           |
| Kenya: Murang'a | Kenya Demographic and Health Survey - Maternal Mortality Data                                                                                        | Sibling History |                                                       | 1989-1990, 2008 | 30 - 34 years   | 4           |
| Kenya: Murang'a | Kenya Demographic and Health Survey - Maternal Mortality Data                                                                                        | Sibling History |                                                       | 1992            | 20 - 39 years   | 18          |
| Kenya: Murang'a | Kenya Demographic and Health Survey - Maternal Mortality Data                                                                                        | Sibling History |                                                       | 1994-2006       | 25 - 54 years   | 4           |
| Kenya: Murang'a | Kenya Population and Housing Census 2009                                                                                                             | Survey/Census   |                                                       | 2009            | All Ages        | 272         |
| Kenya: Murang'a | Mortality patterns in a rural Kenyan community                                                                                                       | Verbal Autopsy  | Nginda Mathithi and Kamahuha Muranga district [rural] | 1986            | birth - 4 years | 216         |
| Kenya: Nairobi  | Kenya Demographic and Health Survey - Maternal Mortality Data                                                                                        | Sibling History |                                                       | 1985-1987       | 15 - 19 years   | 1           |
| Kenya: Nairobi  | Kenya Demographic and Health Survey - Maternal Mortality Data                                                                                        | Sibling History |                                                       | 1989-2008       | 15 - 39 years   | 4           |
| Kenya: Nairobi  | Kenya Population and Housing Census 2009                                                                                                             | Survey/Census   |                                                       | 2009            | All Ages        | 899         |
| Kenya: Nairobi  | Demographic Surveillance System (DSS)                                                                                                                | Verbal Autopsy  |                                                       | 2002-2012       | All Ages        | 6840        |
| Kenya: Nairobi  | Verbal autopsy interpretation: a comparative analysis of the InterVA model versus physician review in determining causes of death in the Nairobi DSS | Verbal Autopsy  |                                                       | 2005            | All Ages        | 572         |
| Kenya: Nakuru   | Kenya Demographic and Health Survey - Maternal Mortality Data                                                                                        | Sibling History |                                                       | 1987            | 30 - 39 years   | 2           |
| Kenya: Nakuru   | Kenya Demographic and Health Survey - Maternal Mortality Data                                                                                        | Sibling History |                                                       | 1989-2006       | 25 - 29 years   | 2           |
| Kenya: Nakuru   | Kenya Population and Housing Census 2009                                                                                                             | Survey/Census   |                                                       | 2009            | All Ages        | 544         |
| Kenya: Nandi    | Kenya Demographic and Health Survey - Maternal Mortality Data                                                                                        | Sibling History |                                                       | 1986-1989       | 35 - 39 years   | 2           |
| Kenya: Nandi    | Kenya Demographic and Health Survey - Maternal Mortality Data                                                                                        | Sibling History |                                                       | 1991-2005       | 15 - 29 years   | 5           |

**Appendix Table 6: Causes of death data source list by geography, source type, and study site, with years, age range, and sample size, excluding sources on lower respiratory infection and diarrhoea etiologies**

| Location         | Source name                                                             | Source type     | Site                                          | Years                | Ages              | Sample size |
|------------------|-------------------------------------------------------------------------|-----------------|-----------------------------------------------|----------------------|-------------------|-------------|
| Kenya: Nandi     | Kenya Demographic and Health Survey - Maternal Mortality Data           | Sibling History |                                               | 2007                 | 55 - 59 years     | 1           |
| Kenya: Nandi     | Kenya Population and Housing Census 2009                                | Survey/Census   |                                               | 2009                 | All Ages          | 204         |
| Kenya: Narok     | Kenya Demographic and Health Survey - Maternal Mortality Data           | Sibling History |                                               | 1987                 | 40 - 44 years     | 2           |
| Kenya: Narok     | Kenya Demographic and Health Survey - Maternal Mortality Data           | Sibling History |                                               | 1994-1995            | 20 - 24 years     | 1           |
| Kenya: Narok     | Kenya Demographic and Health Survey - Maternal Mortality Data           | Sibling History |                                               | 1998-1999            | 15 - 39 years     | 2           |
| Kenya: Narok     | Kenya Demographic and Health Survey - Maternal Mortality Data           | Sibling History |                                               | 2002-2006            | 30 - 39 years     | 6           |
| Kenya: Narok     | Kenya Population and Housing Census 2009                                | Survey/Census   |                                               | 2009                 | All Ages          | 237         |
| Kenya: Nyamira   | Kenya Demographic and Health Survey - Maternal Mortality Data           | Sibling History |                                               | 1986                 | 20 - 39 years     | 5           |
| Kenya: Nyamira   | Kenya Demographic and Health Survey - Maternal Mortality Data           | Sibling History |                                               | 1988-1991            | 15 - 19 years     | 1           |
| Kenya: Nyamira   | Kenya Demographic and Health Survey - Maternal Mortality Data           | Sibling History |                                               | 1993-2004            | 15 - 34 years     | 5           |
| Kenya: Nyamira   | Kenya Demographic and Health Survey - Maternal Mortality Data           | Sibling History |                                               | 2006-2008            | 30 - 39 years     | 2           |
| Kenya: Nyamira   | Kenya Population and Housing Census 2009                                | Survey/Census   |                                               | 2009                 | All Ages          | 178         |
| Kenya: Nyandarua | Kenya Demographic and Health Survey - Maternal Mortality Data           | Sibling History |                                               | 1989-1990            | 20 - 24 years     | 1           |
| Kenya: Nyandarua | Kenya Demographic and Health Survey - Maternal Mortality Data           | Sibling History |                                               | 1992-1993            | 25 - 29 years     | 4           |
| Kenya: Nyandarua | Kenya Demographic and Health Survey - Maternal Mortality Data           | Sibling History |                                               | 1996, 1998-1999      | 20 - 39 years     | 5           |
| Kenya: Nyandarua | Kenya Demographic and Health Survey - Maternal Mortality Data           | Sibling History |                                               | 2001-2004            | 25 - 39 years     | 7           |
| Kenya: Nyandarua | Kenya Demographic and Health Survey - Maternal Mortality Data           | Sibling History |                                               | 2007-2008            | 35 - 39 years     | 1           |
| Kenya: Nyandarua | Kenya Population and Housing Census 2009                                | Survey/Census   |                                               | 2009                 | All Ages          | 180         |
| Kenya: Nyeri     | Kenya Demographic and Health Survey - Maternal Mortality Data           | Sibling History |                                               | 1984-1987            | 30 - 34 years     | 2           |
| Kenya: Nyeri     | Kenya Demographic and Health Survey - Maternal Mortality Data           | Sibling History |                                               | 1989-2007            | 15 - 19 years     | 3           |
| Kenya: Nyeri     | Kenya Population and Housing Census 2009                                | Survey/Census   |                                               | 2009                 | All Ages          | 250         |
| Kenya: Samburu   | Kenya Demographic and Health Survey - Maternal Mortality Data           | Sibling History |                                               | 1992-1993, 2003-2007 | 20 - 24 years     | 3           |
| Kenya: Samburu   | Kenya Demographic and Health Survey - Maternal Mortality Data           | Sibling History |                                               | 1996                 | 25 - 29 years     | 1           |
| Kenya: Samburu   | Kenya Demographic and Health Survey - Maternal Mortality Data           | Sibling History |                                               | 1998-2001            | 30 - 34 years     | 1           |
| Kenya: Samburu   | Kenya Population and Housing Census 2009                                | Survey/Census   |                                               | 2009                 | All Ages          | 93          |
| Kenya: Siaya     | Kenya Demographic and Health Survey - Maternal Mortality Data           | Sibling History |                                               | 1986                 | 25 - 29 years     | 1           |
| Kenya: Siaya     | Kenya Demographic and Health Survey - Maternal Mortality Data           | Sibling History |                                               | 1988-1990            | 15 - 34 years     | 15          |
| Kenya: Siaya     | Kenya Demographic and Health Survey - Maternal Mortality Data           | Sibling History |                                               | 1992-2008            | 15 - 39 years     | 4           |
| Kenya: Siaya     | Kenya Population and Housing Census 2009                                | Survey/Census   |                                               | 2009                 | All Ages          | 633         |
| Kenya: Siaya     | A reversal in reductions of child mortality in western Kenya, 2003-2009 | Verbal Autopsy  | Nyanza Province Asembo and Gem (2003) [rural] | 2003                 | 28 days - 4 years | 1234        |

**Appendix Table 6: Causes of death data source list by geography, source type, and study site, with years, age range, and sample size, excluding sources on lower respiratory infection and diarrhoea etiologies**

| Location            | Source name                                                                               | Source type     | Site                                          | Years      | Ages              | Sample size |
|---------------------|-------------------------------------------------------------------------------------------|-----------------|-----------------------------------------------|------------|-------------------|-------------|
| Kenya: Siaya        | Causes of deaths using verbal autopsy among adolescents and adults in rural western Kenya | Verbal Autopsy  | Nyanza Province Asembo and Gem [rural]        | 2003       | 10 - 79 years     | 1816        |
| Kenya: Siaya        | A reversal in reductions of child mortality in western Kenya, 2003-2009                   | Verbal Autopsy  | Nyanza Province Asembo and Gem (2004) [rural] | 2004       | 28 days - 4 years | 1203        |
| Kenya: Siaya        | A reversal in reductions of child mortality in western Kenya, 2003-2009                   | Verbal Autopsy  | Nyanza Province Asembo and Gem (2005) [rural] | 2005       | 28 days - 4 years | 1045        |
| Kenya: Siaya        | A reversal in reductions of child mortality in western Kenya, 2003-2009                   | Verbal Autopsy  | Nyanza Province Asembo and Gem (2006) [rural] | 2006       | 28 days - 4 years | 873         |
| Kenya: Siaya        | A reversal in reductions of child mortality in western Kenya, 2003-2009                   | Verbal Autopsy  | Nyanza Province Asembo and Gem (2007) [rural] | 2007       | 28 days - 4 years | 865         |
| Kenya: Siaya        | A reversal in reductions of child mortality in western Kenya, 2003-2009                   | Verbal Autopsy  | Nyanza Province Asembo and Gem (2008) [rural] | 2008       | 28 days - 4 years | 1702        |
| Kenya: TaitaTaveta  | Kenya Demographic and Health Survey - Maternal Mortality Data                             | Sibling History |                                               | 1987-1990  | 25 - 29 years     | 1           |
| Kenya: TaitaTaveta  | Kenya Demographic and Health Survey - Maternal Mortality Data                             | Sibling History |                                               | 1992-2008  | 15 - 34 years     | 11          |
| Kenya: TaitaTaveta  | Kenya Population and Housing Census 2009                                                  | Survey/Census   |                                               | 2009       | All Ages          | 84          |
| Kenya: TanaRiver    | Kenya Demographic and Health Survey - Maternal Mortality Data                             | Sibling History |                                               | 1989       | 15 - 19 years     | 1           |
| Kenya: TanaRiver    | Kenya Demographic and Health Survey - Maternal Mortality Data                             | Sibling History |                                               | 1998       | 25 - 49 years     | 3           |
| Kenya: TanaRiver    | Kenya Demographic and Health Survey - Maternal Mortality Data                             | Sibling History |                                               | 2000       | 35 - 39 years     | 1           |
| Kenya: TanaRiver    | Kenya Demographic and Health Survey - Maternal Mortality Data                             | Sibling History |                                               | 2002-2007  | 30 - 34 years     | 1           |
| Kenya: TanaRiver    | Kenya Population and Housing Census 2009                                                  | Survey/Census   |                                               | 2009       | All Ages          | 74          |
| Kenya: TharakaNithi | Kenya Demographic and Health Survey - Maternal Mortality Data                             | Sibling History |                                               | 2002-2003  | 25 - 29 years     | 1           |
| Kenya: TharakaNithi | Kenya Demographic and Health Survey - Maternal Mortality Data                             | Sibling History |                                               | 2006-2007  | 45 - 49 years     | 1           |
| Kenya: TharakaNithi | Kenya Population and Housing Census 2009                                                  | Survey/Census   |                                               | 2009       | All Ages          | 117         |
| Kenya: TransNzoia   | Kenya Demographic and Health Survey - Maternal Mortality Data                             | Sibling History |                                               | 1987       | 15 - 19 years     | 1           |
| Kenya: TransNzoia   | Kenya Demographic and Health Survey - Maternal Mortality Data                             | Sibling History |                                               | 1994-2005  | 20 - 34 years     | 4           |
| Kenya: TransNzoia   | Kenya Demographic and Health Survey - Maternal Mortality Data                             | Sibling History |                                               | 2007-2008  | 40 - 44 years     | 1           |
| Kenya: TransNzoia   | Kenya Population and Housing Census 2009                                                  | Survey/Census   |                                               | 2009       | All Ages          | 262         |
| Kenya: Turkana      | Kenya Demographic and Health Survey - Maternal Mortality Data                             | Sibling History |                                               | 1992, 1998 | 15 - 19 years     | 4           |
| Kenya: Turkana      | Kenya Demographic and Health Survey - Maternal Mortality Data                             | Sibling History |                                               | 1995-1996  | 35 - 39 years     | 1           |
| Kenya: Turkana      | Kenya Demographic and Health Survey - Maternal Mortality Data                             | Sibling History |                                               | 2003       | 25 - 44 years     | 3           |
| Kenya: Turkana      | Kenya Demographic and Health Survey - Maternal Mortality Data                             | Sibling History |                                               | 2005-2006  | 20 - 44 years     | 2           |
| Kenya: Turkana      | Kenya Population and Housing Census 2009                                                  | Survey/Census   |                                               | 2009       | All Ages          | 518         |
| Kenya: UasinGishu   | Kenya Demographic and Health Survey - Maternal Mortality Data                             | Sibling History |                                               | 1985-1987  | 30 - 34 years     | 3           |
| Kenya: UasinGishu   | Kenya Demographic and Health Survey - Maternal Mortality Data                             | Sibling History |                                               | 1990-2008  | 25 - 34 years     | 4           |
| Kenya: UasinGishu   | Kenya Population and Housing Census 2009                                                  | Survey/Census   |                                               | 2009       | All Ages          | 270         |

**Appendix Table 6: Causes of death data source list by geography, source type, and study site, with years, age range, and sample size, excluding sources on lower respiratory infection and diarrhoea etiologies**

| Location         | Source name                                                                                      | Source type        | Site                                      | Years                 | Ages             | Sample size |
|------------------|--------------------------------------------------------------------------------------------------|--------------------|-------------------------------------------|-----------------------|------------------|-------------|
| Kenya: Vihiga    | Kenya Demographic and Health Survey - Maternal Mortality Data                                    | Sibling History    |                                           | 1992-1996             | 30 - 34 years    | 3           |
| Kenya: Vihiga    | Kenya Demographic and Health Survey - Maternal Mortality Data                                    | Sibling History    |                                           | 1999-2003             | 30 - 39 years    | 2           |
| Kenya: Vihiga    | Kenya Demographic and Health Survey - Maternal Mortality Data                                    | Sibling History    |                                           | 2005                  | 40 - 44 years    | 2           |
| Kenya: Vihiga    | Kenya Demographic and Health Survey - Maternal Mortality Data                                    | Sibling History    |                                           | 2007-2008             | 45 - 49 years    | 1           |
| Kenya: Vihiga    | Kenya Population and Housing Census 2009                                                         | Survey/Census      |                                           | 2009                  | All Ages         | 228         |
| Kenya: Wajir     | Kenya Demographic and Health Survey - Maternal Mortality Data                                    | Sibling History    |                                           | 1990-2005             | 15 - 24 years    | 2           |
| Kenya: Wajir     | Kenya Population and Housing Census 2009                                                         | Survey/Census      |                                           | 2009                  | All Ages         | 194         |
| Kenya: WestPokot | Kenya Demographic and Health Survey - Maternal Mortality Data                                    | Sibling History    |                                           | 1991, 1993, 2000-2002 | 25 - 29 years    | 3           |
| Kenya: WestPokot | Kenya Demographic and Health Survey - Maternal Mortality Data                                    | Sibling History    |                                           | 1997, 2005            | 20 - 24 years    | 4           |
| Kenya: WestPokot | Kenya Population and Housing Census 2009                                                         | Survey/Census      |                                           | 2009                  | All Ages         | 310         |
| Madagascar       | United Nations Surveys on Crime Trends and the Operations of Criminal Justice Systems 1970-2006  | Police Records     |                                           | 1980, 1985-1994       | All Ages         | Death Rate  |
| Madagascar       | United Nations Office on Drugs and Crime Global Study on Homicide 2011                           | Police Records     | Madagascar UNU                            | 2000                  | All Ages         | Death Rate  |
| Madagascar       | Madagascar Demographic and Health Survey - Maternal Mortality Data                               | Sibling History    |                                           | 1980-2008             | 15 - 49 years    | 76          |
| Madagascar       | Madagascar - Antananorivo Mortality Report 1984-1995                                             | Vital Registration | Antananarivo                              | 1984-1995             | All Ages         | 79862       |
| Malawi           | United Nations Surveys on Crime Trends and the Operations of Criminal Justice Systems 1970-2006  | Police Records     |                                           | 1981-1985             | All Ages         | Death Rate  |
| Malawi           | Malawi Demographic and Health Survey - Maternal Mortality Data                                   | Sibling History    |                                           | 1980-2010             | 15 - 39 years    | 16          |
| Malawi           | International Integrated Public Use Microdata Series (IPUMS)                                     | Survey/Census      |                                           | 2008                  | 15 - 49 years    | 2306        |
| Malawi           | Malawi Population and Housing Census 2008                                                        | Survey/Census      |                                           | 2008                  | 10 - 49 years    | 24826       |
| Malawi           | Malawi Population and Housing Census 2008                                                        | Survey/Census      |                                           | 2008                  | All Ages         | 14871       |
| Malawi           | Infant and second-year mortality in rural Malawi: causes and descriptive epidemiology            | Verbal Autopsy     | Mangochi Malaria Research Project [rural] | 1988                  | birth - 4 years  | 683         |
| Malawi           | Estimation of AIDS adult mortality by verbal autopsy in rural Malawi                             | Verbal Autopsy     | three rural areas [rural]                 | 1999                  | 15 - 44 years    | 100         |
| Malawi           | Demographic Surveillance System (DSS)                                                            | Verbal Autopsy     |                                           | 2003-2011             | All Ages         | 2063        |
| Malawi           | Declining child mortality in northern Malawi despite high rates of infection with HIV            | Verbal Autopsy     | Karonga district [rural]                  | 2004                  | birth - 14 years | 342         |
| Malawi           | Adult mortality and probable cause of death in rural northern Malawi in the era of HIV treatment | Verbal Autopsy     | Karonga district [rural]                  | 2004-2008             | 15 years +       | 877         |
| Malawi           | Rates and causes of death in Chiradzulu District, Malawi, 2008: a key informant study            | Verbal Autopsy     | Chiradzulu District [rural]               | 2008                  | All Ages         | 50          |
| Malawi           | Measuring causes of adult mortality in rural northern Malawi over a decade of change             | Verbal Autopsy     | Karonga District [rural]                  | 2009-2012             | 15 - 64 years    | 538         |
| Mozambique       | United Nations Office on Drugs and Crime Global Study on Homicide 2011                           | Police Records     | Mozambique UN-CASA                        | 1999-2003             | All Ages         | Death Rate  |
| Mozambique       | Global Status Report on Road Safety 2009                                                         | Police Records     |                                           | 2007                  | All Ages         | Death Rate  |
| Mozambique       | United Nations Office on Drugs and Crime Global Study on Homicide 2011                           | Police Records     | Mozambique GBI                            | 2007                  | All Ages         | Death Rate  |
| Mozambique       | Mozambique Demographic and Health Survey - Maternal Mortality Data                               | Sibling History    |                                           | 1983-2011             | 15 - 39 years    | 45          |

**Appendix Table 6: Causes of death data source list by geography, source type, and study site, with years, age range, and sample size, excluding sources on lower respiratory infection and diarrhoea etiologies**

| Location    | Source name                                                                                                                                       | Source type        | Site                                                          | Years     | Ages             | Sample size |
|-------------|---------------------------------------------------------------------------------------------------------------------------------------------------|--------------------|---------------------------------------------------------------|-----------|------------------|-------------|
| Mozambique  | Mozambique Census 2007                                                                                                                            | Survey/Census      |                                                               | 2002      | 10 - 49 years    | 53567       |
| Mozambique  | Mortality rates, prevalence of malnutrition, and prevalence of lost pregnancies among the drought-ravaged population of Tete Province, Mozambique | Survey/Census      | Cahora Bassa Changara Districts Tete Province [rural]         | 2003      | All Ages         | 214         |
| Mozambique  | Quality of registration of maternal deaths in Mozambique: a community-based study in rural and urban areas                                        | Verbal Autopsy     | Chingussura sub-center Beira city Sofala Province [periurban] | 1996      | 15 - 49 years    | 22          |
| Mozambique  | Quality of registration of maternal deaths in Mozambique: a community-based study in rural and urban areas                                        | Verbal Autopsy     | Dondo sub-center Dondo district Sofala Province               | 1996      | 15 - 49 years    | 54          |
| Mozambique  | Quality of registration of maternal deaths in Mozambique: a community-based study in rural and urban areas                                        | Verbal Autopsy     | Mafambisse sub-center Dondo district Sofala Province          | 1996      | 15 - 49 years    | 38          |
| Mozambique  | Quality of registration of maternal deaths in Mozambique: a community-based study in rural and urban areas                                        | Verbal Autopsy     | Manga sub-center Beira city Sofala Province [periurban]       | 1996      | 15 - 49 years    | 17          |
| Mozambique  | Quality of registration of maternal deaths in Mozambique: a community-based study in rural and urban areas                                        | Verbal Autopsy     | Metuchira sub-center Nhamatanda District Sofala province      | 1996      | 15 - 49 years    | 21          |
| Mozambique  | Quality of registration of maternal deaths in Mozambique: a community-based study in rural and urban areas                                        | Verbal Autopsy     | Nhamatanda sub-center Nhamatanda district Sofala province     | 1996      | 15 - 49 years    | 32          |
| Mozambique  | Quality of registration of maternal deaths in Mozambique: a community-based study in rural and urban areas                                        | Verbal Autopsy     | Ponta-Gea and Baxia [urban]                                   | 1996      | 15 - 49 years    | 18          |
| Mozambique  | Quality of registration of maternal deaths in Mozambique: a community-based study in rural and urban areas                                        | Verbal Autopsy     | Siluvo sub-center Nhamatanda district Sofala province         | 1996      | 15 - 49 years    | 12          |
| Mozambique  | A 10 year study of the cause of death in children under 15 years in Manhica, Mozambique                                                           | Verbal Autopsy     | Manhica District [rural]                                      | 2001      | birth - 14 years | 3696        |
| Mozambique  | Demographic Surveillance System (DSS)                                                                                                             | Verbal Autopsy     | Manhica                                                       | 2002      | All Ages         | 1248        |
| Mozambique  | Mozambique National Survey on the Causes of Death 2007-2008                                                                                       | Verbal Autopsy     |                                                               | 2007      | All Ages         | 10080       |
| Mozambique  | Mozambique Main Causes of Reported Death Study 2001                                                                                               | Vital Registration | Maputo Beira Chimoio Nampula                                  | 2001      | All Ages         | 22865       |
| Rwanda      | United Nations Surveys on Crime Trends and the Operations of Criminal Justice Systems 1970-2006                                                   | Police Records     |                                                               | 1986-1990 | All Ages         | Death Rate  |
| Rwanda      | United Nations Office on Drugs and Crime Global Study on Homicide 2011                                                                            | Police Records     | Rwanda National police                                        | 2003-2007 | All Ages         | Death Rate  |
| Rwanda      | Global Status Report on Road Safety 2009                                                                                                          | Police Records     |                                                               | 2007      | All Ages         | Death Rate  |
| Rwanda      | Rwanda Demographic and Health Survey - Maternal Mortality Data                                                                                    | Sibling History    |                                                               | 1986-2010 | 15 - 39 years    | 21          |
| South Sudan | Mortality Data for Ebola Outbreaks 1994-2014                                                                                                      | Surveillance       |                                                               | 2004      | All Ages         | CF          |
| South Sudan | International Integrated Public Use Microdata Series (IPUMS)                                                                                      | Survey/Census      |                                                               | 2008      | 1 year +         | 23488       |
| South Sudan | Sudan Population and Housing Census 2008                                                                                                          | Survey/Census      | South Sudan                                                   | 2008      | All Ages         | 11755       |
| Tanzania    | United Nations Office on Drugs and Crime Global Study on Homicide 2011                                                                            | Police Records     | Tanzania Interpol                                             | 2003-2004 | All Ages         | Death Rate  |
| Tanzania    | Tanzania Demographic and Health Survey - Maternal Mortality Data                                                                                  | Sibling History    |                                                               | 1982-2009 | 15 - 44 years    | 36          |
| Tanzania    | Causes and risk factors for maternal mortality in rural Tanzania--case of Rufiji Health and Demographic Surveillance Site (HDSS)                  | Surveillance       | Rufiji                                                        | 2004      | 15 - 49 years    | 767         |
| Tanzania    | Risk factors for deaths in children under 5 years old in Bagamoyo district, Tanzania                                                              | Verbal Autopsy     | Bagamoyo District [rural]                                     | 1986      | birth - 4 years  | 610         |
| Tanzania    | Mortality of under-fives in a rural area of holoendemic malaria transmission                                                                      | Verbal Autopsy     | Muheza District (Mkusi Kilulu Enzi Tingeni Languza) [rural]   | 1992      | 7 days - 4 years | 83          |
| Tanzania    | Retrospective follow-up of maternal deaths and their associated risk factors in a rural district of Tanzania                                      | Verbal Autopsy     | Bagamoyo District [rural]                                     | 1993      | 15 - 49 years    | MMR         |

**Appendix Table 6: Causes of death data source list by geography, source type, and study site, with years, age range, and sample size, excluding sources on lower respiratory infection and diarrhoea etiologies**

| Location | Source name                                                                                                                                                                                                                  | Source type     | Site                                                                                 | Years            | Ages             | Sample size |
|----------|------------------------------------------------------------------------------------------------------------------------------------------------------------------------------------------------------------------------------|-----------------|--------------------------------------------------------------------------------------|------------------|------------------|-------------|
| Tanzania | Community based studies on childhood mortality in a malaria holoendemic area on the Tanzanian coast                                                                                                                          | Verbal Autopsy  | Bagamoyo District [rural]                                                            | 1993             | birth - 4 years  | 118         |
| Tanzania | Avoidable stillbirths and neonatal deaths in rural Tanzania                                                                                                                                                                  | Verbal Autopsy  | Mbulu and Hanang districts [rural]                                                   | 1995             | birth - 27 days  | 76          |
| Tanzania | The Policy Implications of Tanzania's Mortality Burden                                                                                                                                                                       | Verbal Autopsy  | Dar                                                                                  | 1995, 1998, 2001 | All Ages         | 7219        |
| Tanzania | The Policy Implications of Tanzania's Mortality Burden                                                                                                                                                                       | Verbal Autopsy  | Hai                                                                                  | 1995, 1998, 2001 | All Ages         | 13560       |
| Tanzania | The Policy Implications of Tanzania's Mortality Burden                                                                                                                                                                       | Verbal Autopsy  | Morogoro                                                                             | 1995, 1998, 2001 | All Ages         | 15216       |
| Tanzania | Verbal autopsy in establishing cause of perinatal death                                                                                                                                                                      | Verbal Autopsy  | Hai Northern Sentinel [rural]                                                        | 1996             | birth - 6 days   | 31          |
| Tanzania | Effect of HIV infection on pregnancy-related mortality in sub-Saharan Africa: secondary analyses of pooled community-based data from the network for Analysing Longitudinal Population-based HIV/AIDS data on Africa (ALPHA) | Verbal Autopsy  | Kisesa [all]                                                                         | 2000             | 15 - 49 years    | 157         |
| Tanzania | Demographic Surveillance System (DSS)                                                                                                                                                                                        | Verbal Autopsy  | Rufiji                                                                               | 2000             | All Ages         | 3930        |
| Tanzania | Demographic Surveillance System (DSS)                                                                                                                                                                                        | Verbal Autopsy  | Ifakara                                                                              | 2001             | All Ages         | 1713        |
| Tanzania | Patterns of malaria related mortality based on verbal autopsy in Muleba District, north-western Tanzania                                                                                                                     | Verbal Autopsy  | Ijumbi Nshambya Ikondo Bushemba Bunywambele Kibanga villages Muleba District [rural] | 2001             | birth - 69 years | 423         |
| Tanzania | Tanzania - Clustering of mortality among children under five years due to malaria at the Ifakara Demographic Surveillance Site                                                                                               | Verbal Autopsy  | IFAKARA [rural]                                                                      | 2002-2005        | birth - 4 years  | 643         |
| Tanzania | Effect of zinc supplementation on mortality in children aged 1-48 months: a community-based randomised placebo-controlled trial                                                                                              | Verbal Autopsy  | Pemba                                                                                | 2004             | birth - 4 years  | 389         |
| Tanzania | Risk factors for injury mortality in rural Tanzania: a secondary data analysis                                                                                                                                               | Verbal Autopsy  | Rufiji [rural]                                                                       | 2004             | 1 year +         | 4471        |
| Tanzania | Muertes de adultos y el futuro: Un análisis causa-específico de las muertes de adultos de un estudio longitudinal en Tanzania rural 2003-2007                                                                                | Verbal Autopsy  | Kilombero & Ulanga districts rural [Ifakara HDSS]                                    | 2005             | 15 - 29 years    | 1130        |
| Tanzania | Risk Factors and Causes of Adult Deaths in the Ifakara Health and Demographic Surveillance System Population, 2003-2007                                                                                                      | Verbal Autopsy  | Kilombero and Ulanga districts IFAKARA [rural]                                       | 2005             | 15 - 59 years    | 1139        |
| Tanzania | The contribution of reduction in malaria as a cause of rapid decline of under-five mortality: evidence from the Rufiji Health and Demographic Surveillance System (HDSS) in rural Tanzania                                   | Verbal Autopsy  | Rufiji district Rufiji HDSS [rural]                                                  | 2005             | birth - 4 years  | 1292        |
| Tanzania | The Role of Birth Order in Infant Mortality in Ifakara DSS Area in Rural Tanzania                                                                                                                                            | Verbal Autopsy  | 25 villages of Kilombero and Ulanga districts IFAKARA [rural]                        | 2005-2007        | birth - 364 days | 1295        |
| Tanzania | Neonatal deaths in rural southern Tanzania: care-seeking and causes of death                                                                                                                                                 | Verbal Autopsy  | Lindi and Mtwara regions [rural]                                                     | 2007             | birth - 27 days  | 219         |
| Uganda   | United Nations Office on Drugs and Crime Global Study on Homicide 2011                                                                                                                                                       | Police Records  | Uganda CTS                                                                           | 2003-2004        | All Ages         | Death Rate  |
| Uganda   | Global Status Report on Road Safety 2009                                                                                                                                                                                     | Police Records  |                                                                                      | 2006             | All Ages         | Death Rate  |
| Uganda   | Uganda Demographic and Health Survey - Maternal Mortality Data                                                                                                                                                               | Sibling History |                                                                                      | 1981-2011        | 15 - 59 years    | 3761        |
| Uganda   | Mortality Data for Ebola Outbreaks 1994-2014                                                                                                                                                                                 | Surveillance    |                                                                                      | 2007, 2011       | All Ages         | CF          |
| Uganda   | Effect of HIV infection on pregnancy-related mortality in sub-Saharan Africa: secondary analyses of pooled community-based data from the network for Analysing Longitudinal Population-based HIV/AIDS data on Africa (ALPHA) | Verbal Autopsy  | Masaka [all]                                                                         | 2000             | 15 - 49 years    | 117         |

**Appendix Table 6: Causes of death data source list by geography, source type, and study site, with years, age range, and sample size, excluding sources on lower respiratory infection and diarrhoea etiologies**

| Location                   | Source name                                                                                                                                                                                                                  | Source type        | Site                                            | Years                 | Ages            | Sample size |
|----------------------------|------------------------------------------------------------------------------------------------------------------------------------------------------------------------------------------------------------------------------|--------------------|-------------------------------------------------|-----------------------|-----------------|-------------|
| Uganda                     | Effect of HIV infection on pregnancy-related mortality in sub-Saharan Africa: secondary analyses of pooled community-based data from the network for Analysing Longitudinal Population-based HIV/AIDS data on Africa (ALPHA) | Verbal Autopsy     | Rakai [all]                                     | 2000                  | 15 - 49 years   | 139         |
| Uganda                     | Using the three delays model to understand why newborn babies die in eastern Uganda                                                                                                                                          | Verbal Autopsy     | Iganga and Mayuge Districts [rural]             | 2006                  | birth - 27 days | 64          |
| Uganda                     | Uganda Child Verbal Autopsy Study 2007                                                                                                                                                                                       | Verbal Autopsy     | national                                        | 2006                  | birth - 4 years | 530         |
| Uganda                     | Using verbal autopsy to assess the prevalence of HIV infection among deaths in the ART period in rural Uganda: a prospective cohort study, 2006-2008                                                                         | Verbal Autopsy     | rural southwest Uganda [rural]                  | 2007                  | 10 years +      | 264         |
| Uganda                     | Two year mortality and associated factors in a cohort of children from rural Uganda                                                                                                                                          | Verbal Autopsy     | Iganga and Mayuge districts [rural]             | 2009                  | 1 - 4 years     | 46          |
| Zambia                     | United Nations Surveys on Crime Trends and the Operations of Criminal Justice Systems 1970-2006                                                                                                                              | Police Records     |                                                 | 1980, 1990-1994       | All Ages        | Death Rate  |
| Zambia                     | United Nations Office on Drugs and Crime Global Study on Homicide 2011                                                                                                                                                       | Police Records     | Zambia CTS                                      | 1998-1999             | All Ages        | Death Rate  |
| Zambia                     | Global Status Report on Road Safety 2009                                                                                                                                                                                     | Police Records     |                                                 | 2007                  | All Ages        | Death Rate  |
| Zambia                     | Zambia Demographic and Health Survey - Maternal Mortality Data                                                                                                                                                               | Sibling History    |                                                 | 1982-2013             | 15 - 44 years   | 81          |
| Zambia                     | Zambia Census of Population and Housing 2010                                                                                                                                                                                 | Survey/Census      |                                                 | 2010                  | 15 - 49 years   | MMR         |
| Zambia                     | Effect of training traditional birth attendants on neonatal mortality (Lufwanyama Neonatal Survival Project): randomised controlled study                                                                                    | Verbal Autopsy     | Lafwanyama district Copperbelt province [rural] | 2007                  | birth - 27 days | 58          |
| Zambia                     | Causes of stillbirth, neonatal death and early childhood death in rural Zambia by verbal autopsy assessments                                                                                                                 | Verbal Autopsy     | 4 communities Kafue district [rural]            | 2008                  | birth - 4 years | 98          |
| Zambia                     | Zambia Sample Vital Registration with Verbal Autopsy (SAVVY) Data 2010                                                                                                                                                       | Verbal Autopsy     |                                                 | 2009-2010             | All Ages        | 1043        |
| Botswana                   | United Nations Surveys on Crime Trends and the Operations of Criminal Justice Systems 1970-2006                                                                                                                              | Police Records     |                                                 | 1982, 1984-1990       | All Ages        | Death Rate  |
| Botswana                   | United Nations Office on Drugs and Crime Global Study on Homicide 2011                                                                                                                                                       | Police Records     | Botswana CTS                                    | 2005-2006, 2009       | All Ages        | Death Rate  |
| Botswana                   | Botswana Stats Brief Maternal Mortality Ratio 2005-2009                                                                                                                                                                      | Surveillance       |                                                 | 2005-2009             | 15 - 49 years   | MMR         |
| Botswana                   | Botswana Stats Brief Maternal Mortality Ratio 2007-2011                                                                                                                                                                      | Surveillance       |                                                 | 2010-2011             | 15 - 49 years   | MMR         |
| Botswana                   | Botswana AIDS Impact Survey                                                                                                                                                                                                  | Survey/Census      |                                                 | 2003, 2007            | All Ages        | 51831       |
| Lesotho                    | United Nations Surveys on Crime Trends and the Operations of Criminal Justice Systems 1970-2006                                                                                                                              | Police Records     |                                                 | 1986, 1988, 1990-1994 | All Ages        | Death Rate  |
| Lesotho                    | United Nations Office on Drugs and Crime Global Study on Homicide 2011                                                                                                                                                       | Police Records     | Lesotho CTS                                     | 2009                  | All Ages        | Death Rate  |
| Lesotho                    | Lesotho Demographic and Health Survey - Maternal Mortality Data                                                                                                                                                              | Sibling History    |                                                 | 1990-2009             | 15 - 49 years   | 135         |
| Lesotho                    | Lesotho Population and Housing Census 1996                                                                                                                                                                                   | Survey/Census      |                                                 | 1995-1996             | 15 - 39 years   | 3480        |
| Lesotho                    | Lesotho Population and Housing Census 2006                                                                                                                                                                                   | Survey/Census      |                                                 | 2006                  | All Ages        | 44580       |
| Namibia                    | United Nations Office on Drugs and Crime Global Study on Homicide 2011                                                                                                                                                       | Police Records     | Namibia Interpol                                | 2004                  | All Ages        | Death Rate  |
| Namibia                    | Namibia Demographic and Health Survey - Maternal Mortality Data                                                                                                                                                              | Sibling History    |                                                 | 1980-2013             | 15 - 59 years   | 2799        |
| South Africa: Eastern Cape | Demographic and Health Survey (DHS)                                                                                                                                                                                          | Sibling History    |                                                 | 1984-1998             | 15 - 19 years   | 1           |
| South Africa: Eastern Cape | South Africa Saving Mothers                                                                                                                                                                                                  | Surveillance       |                                                 | 1998-2013             | 10 - 54 years   | 2510        |
| South Africa: Eastern Cape | South Africa Vital Registration System                                                                                                                                                                                       | Vital Registration |                                                 | 1997-2013             | All Ages        | 1190671     |
| South Africa: Free State   | Demographic and Health Survey (DHS)                                                                                                                                                                                          | Sibling History    |                                                 | 1985-1988             | 30 - 39 years   | 3           |

**Appendix Table 6: Causes of death data source list by geography, source type, and study site, with years, age range, and sample size, excluding sources on lower respiratory infection and diarrhoea etiologies**

| Location                    | Source name                                                                                                                                                                                                                  | Source type        | Site                                                                          | Years                | Ages          | Sample size |
|-----------------------------|------------------------------------------------------------------------------------------------------------------------------------------------------------------------------------------------------------------------------|--------------------|-------------------------------------------------------------------------------|----------------------|---------------|-------------|
| South Africa: Free State    | Demographic and Health Survey (DHS)                                                                                                                                                                                          | Sibling History    |                                                                               | 1990-1998            | 15 - 49 years | 9           |
| South Africa: Free State    | South Africa Saving Mothers                                                                                                                                                                                                  | Surveillance       |                                                                               | 1998-2013            | 10 - 54 years | 2015        |
| South Africa: Free State    | South Africa Vital Registration System                                                                                                                                                                                       | Vital Registration |                                                                               | 1997-2013            | All Ages      | 752205      |
| South Africa: Gauteng       | Demographic and Health Survey (DHS)                                                                                                                                                                                          | Sibling History    |                                                                               | 1984-1998            | 40 - 44 years | 1           |
| South Africa: Gauteng       | South Africa Saving Mothers                                                                                                                                                                                                  | Surveillance       |                                                                               | 1998-2013            | 10 - 54 years | 3691        |
| South Africa: Gauteng       | South Africa Vital Registration System                                                                                                                                                                                       | Vital Registration |                                                                               | 1997-2013            | All Ages      | 1606722     |
| South Africa: KwaZulu-Natal | Demographic and Health Survey (DHS)                                                                                                                                                                                          | Sibling History    |                                                                               | 1984-1998            | 15 - 19 years | 1           |
| South Africa: KwaZulu-Natal | South Africa Saving Mothers                                                                                                                                                                                                  | Surveillance       |                                                                               | 1998-2013            | 10 - 54 years | 4699        |
| South Africa: KwaZulu-Natal | Demographic Surveillance System (DSS)                                                                                                                                                                                        | Verbal Autopsy     |                                                                               | 2000-2011            | All Ages      | 9290        |
| South Africa: KwaZulu-Natal | Mortality in women of reproductive age in rural South Africa                                                                                                                                                                 | Verbal Autopsy     | KwaZulu-Natal districtAfrica Center for Health and Population Studies [rural] | 2005                 | 15 - 49 years | 3098        |
| South Africa: KwaZulu-Natal | South Africa Vital Registration System                                                                                                                                                                                       | Vital Registration |                                                                               | 1997-2013            | All Ages      | 1878626     |
| South Africa: Limpopo       | Demographic and Health Survey (DHS)                                                                                                                                                                                          | Sibling History    |                                                                               | 1984-1987, 1989-1998 | 45 - 49 years | 2           |
| South Africa: Limpopo       | South Africa Saving Mothers                                                                                                                                                                                                  | Surveillance       |                                                                               | 1998-2013            | 10 - 54 years | 2487        |
| South Africa: Limpopo       | South Africa Vital Registration System                                                                                                                                                                                       | Vital Registration |                                                                               | 1997-2013            | All Ages      | 768255      |
| South Africa: Mpumalanga    | Demographic and Health Survey (DHS)                                                                                                                                                                                          | Sibling History    |                                                                               | 1984-1987            | 15 - 59 years | 6           |
| South Africa: Mpumalanga    | Demographic and Health Survey (DHS)                                                                                                                                                                                          | Sibling History    |                                                                               | 1989-1998            | 15 - 49 years | 5           |
| South Africa: Mpumalanga    | South Africa Saving Mothers                                                                                                                                                                                                  | Surveillance       |                                                                               | 1998-2013            | 10 - 54 years | 1717        |
| South Africa: Mpumalanga    | Demographic Surveillance System (DSS)                                                                                                                                                                                        | Verbal Autopsy     |                                                                               | 1992-2011            | All Ages      | 9437        |
| South Africa: Mpumalanga    | South Africa Vital Registration System                                                                                                                                                                                       | Vital Registration |                                                                               | 1997-2013            | All Ages      | 658825      |
| South Africa: North-West    | Demographic and Health Survey (DHS)                                                                                                                                                                                          | Sibling History    |                                                                               | 1984-1986            | 20 - 44 years | 12          |
| South Africa: North-West    | Demographic and Health Survey (DHS)                                                                                                                                                                                          | Sibling History    |                                                                               | 1988-1998            | 15 - 19 years | 5           |
| South Africa: North-West    | South Africa Saving Mothers                                                                                                                                                                                                  | Surveillance       |                                                                               | 1998-2013            | 10 - 54 years | 1632        |
| South Africa: North-West    | South Africa Vital Registration System                                                                                                                                                                                       | Vital Registration |                                                                               | 1997-2013            | All Ages      | 703503      |
| South Africa: Northern Cape | Demographic and Health Survey (DHS)                                                                                                                                                                                          | Sibling History    |                                                                               | 1984-1990            | 15 - 39 years | 2           |
| South Africa: Northern Cape | Demographic and Health Survey (DHS)                                                                                                                                                                                          | Sibling History    |                                                                               | 1992-1998            | 25 - 44 years | 5           |
| South Africa: Northern Cape | South Africa Saving Mothers                                                                                                                                                                                                  | Surveillance       |                                                                               | 1998-2013            | 10 - 54 years | 636         |
| South Africa: Northern Cape | South Africa Vital Registration System                                                                                                                                                                                       | Vital Registration |                                                                               | 1997-2013            | All Ages      | 221494      |
| South Africa: Western Cape  | Demographic and Health Survey (DHS)                                                                                                                                                                                          | Sibling History    |                                                                               | 1984-1988            | 25 - 29 years | 1           |
| South Africa: Western Cape  | Demographic and Health Survey (DHS)                                                                                                                                                                                          | Sibling History    |                                                                               | 1990-1998            | 35 - 39 years | 1           |
| South Africa: Western Cape  | South Africa Saving Mothers                                                                                                                                                                                                  | Surveillance       |                                                                               | 1998-2013            | 10 - 54 years | 1020        |
| South Africa: Western Cape  | South Africa Vital Registration System                                                                                                                                                                                       | Vital Registration |                                                                               | 1997-2013            | All Ages      | 712064      |
| Swaziland                   | United Nations Surveys on Crime Trends and the Operations of Criminal Justice Systems 1970-2006                                                                                                                              | Police Records     |                                                                               | 1986-1994            | All Ages      | Death Rate  |
| Swaziland                   | United Nations Office on Drugs and Crime Global Study on Homicide 2011                                                                                                                                                       | Police Records     | Swaziland CTS                                                                 | 1995, 2003-2004      | All Ages      | Death Rate  |
| Swaziland                   | Demographic and Health Survey (DHS)                                                                                                                                                                                          | Sibling History    |                                                                               | 1992-2006            | 15 - 34 years | 9           |
| Swaziland                   | Effect of HIV infection on pregnancy-related mortality in sub-Saharan Africa: secondary analyses of pooled community-based data from the network for Analysing Longitudinal Population-based HIV/AIDS data on Africa (ALPHA) | Verbal Autopsy     | uMkhanyakude [all]                                                            | 2000                 | 15 - 49 years | 59          |
| Zimbabwe                    | United Nations Surveys on Crime Trends and the Operations of Criminal Justice Systems 1970-2006                                                                                                                              | Police Records     |                                                                               | 1986                 | All Ages      | Death Rate  |



**Appendix Table 6: Causes of death data source list by geography, source type, and study site, with years, age range, and sample size, excluding sources on lower respiratory infection and diarrhoea etiologies**

| Location     | Source name                                                                                                                                                                                                                  | Source type        | Site                                                                                                                                 | Years                | Ages             | Sample size |
|--------------|------------------------------------------------------------------------------------------------------------------------------------------------------------------------------------------------------------------------------|--------------------|--------------------------------------------------------------------------------------------------------------------------------------|----------------------|------------------|-------------|
| Zimbabwe     | United Nations Office on Drugs and Crime Global Study on Homicide 2011                                                                                                                                                       | Police Records     | Zimbabwe CTS                                                                                                                         | 1995-2000, 2003-2007 | All Ages         | Death Rate  |
| Zimbabwe     | Global Status Report on Road Safety 2009                                                                                                                                                                                     | Police Records     |                                                                                                                                      | 2006                 | All Ages         | Death Rate  |
| Zimbabwe     | Zimbabwe Demographic and Health Survey - Maternal Mortality Data                                                                                                                                                             | Sibling History    |                                                                                                                                      | 1980-2010            | 15 - 49 years    | 78          |
| Zimbabwe     | Zimbabwe Population and Housing Census 1992                                                                                                                                                                                  | Survey/Census      |                                                                                                                                      | 1991-1992            | 15 - 49 years    | 25982       |
| Zimbabwe     | World Health Survey (WHS)                                                                                                                                                                                                    | Survey/Census      |                                                                                                                                      | 1997                 | All Ages         | 10          |
| Zimbabwe     | Zimbabwe Population and Housing Census 2002                                                                                                                                                                                  | Survey/Census      |                                                                                                                                      | 2001-2002            | 15 - 49 years    | 102674      |
| Zimbabwe     | Zimbabwe Population and Housing Census 2012                                                                                                                                                                                  | Survey/Census      |                                                                                                                                      | 2012                 | 15 - 49 years    | MMR         |
| Zimbabwe     | Effect of HIV infection on pregnancy-related mortality in sub-Saharan Africa: secondary analyses of pooled community-based data from the network for Analysing Longitudinal Population-based HIV/AIDS data on Africa (ALPHA) | Verbal Autopsy     | Manicaland [all]                                                                                                                     | 2000                 | 15 - 49 years    | 206         |
| Zimbabwe     | WHO Mortality Database                                                                                                                                                                                                       | Vital Registration |                                                                                                                                      | 1990                 | All Ages         | 34817       |
| Zimbabwe     | Zimbabwe Vital Statistics - Deaths 1995                                                                                                                                                                                      | Vital Registration |                                                                                                                                      | 1995                 | All Ages         | 75489       |
| Zimbabwe     | Zimbabwe Mortality Report 2007                                                                                                                                                                                               | Vital Registration |                                                                                                                                      | 2007                 | All Ages         | 62232       |
| Benin        | Benin Demographic and Health Survey - Maternal Mortality Data                                                                                                                                                                | Sibling History    |                                                                                                                                      | 1982-2006            | 15 - 44 years    | 68          |
| Benin        | Incidence de décès de 0 à 1 an dans une cohorte de 802 enfants en milieu rural au sud du Bénin                                                                                                                               | Verbal Autopsy     | Pahou Avlekete [rural]                                                                                                               | 1989                 | birth - 364 days | 25          |
| Burkina Faso | United Nations Office on Drugs and Crime Global Study on Homicide 2011                                                                                                                                                       | Police Records     | Burkina Faso NSO                                                                                                                     | 2002-2007            | All Ages         | Death Rate  |
| Burkina Faso | Global Status Report on Road Safety 2009                                                                                                                                                                                     | Police Records     |                                                                                                                                      | 2007                 | All Ages         | Death Rate  |
| Burkina Faso | Burkina Faso Demographic and Health Survey - Maternal Mortality Data                                                                                                                                                         | Sibling History    |                                                                                                                                      | 1984-2010            | 15 - 24 years    | 10          |
| Burkina Faso | The epidemiology of pregnancy outcomes in rural Burkina Faso                                                                                                                                                                 | Sibling History    | Ourgaye and Diapaga districts [rural]                                                                                                | 2004                 | 15 - 49 years    | MMR         |
| Burkina Faso | Burkina Faso - Pissila Analysis of Mortality in Childhood after Three Years of Observation 1985-1987                                                                                                                         | Survey/Census      | 8 villages Pissila Region [rural]                                                                                                    | 1986                 | birth - 364 days | 247         |
| Burkina Faso | Burkina Faso - Niangoloko Childhood Mortality 1986-1988                                                                                                                                                                      | Survey/Census      | Korogora Kitobama Dionouna Tiempagora Letiefesso Fornefesso Katierla Nafona Yendere Diefoula Boko villages Niangoloko region [rural] | 1987                 | birth - 4 years  | 164         |
| Burkina Faso | Burkina Faso Population and Housing Census 2006                                                                                                                                                                              | Survey/Census      |                                                                                                                                      | 2006                 | 15 - 49 years    | MMR         |
| Burkina Faso | Burkina Faso Health Statistical Yearbook 2006                                                                                                                                                                                | Survey/Census      |                                                                                                                                      | 2006                 | 15 - 49 years    | MMR         |
| Burkina Faso | The burden of malaria mortality among African children in the year 2000                                                                                                                                                      | Verbal Autopsy     | Kongodjan area [rural]                                                                                                               | 1984                 | birth - 4 years  | 43          |
| Burkina Faso | Measuring the local burden of disease. A study of years of life lost in sub-Saharan Africa                                                                                                                                   | Verbal Autopsy     | Nouna                                                                                                                                | 1998                 | All Ages         | 1400        |
| Burkina Faso | Demographic Surveillance System (DSS)                                                                                                                                                                                        | Verbal Autopsy     |                                                                                                                                      | 1998-2011            | All Ages         | 7589        |
| Burkina Faso | Demographic Surveillance System (DSS)                                                                                                                                                                                        | Verbal Autopsy     | Nouna                                                                                                                                | 2000                 | All Ages         | 2087        |
| Burkina Faso | Patterns of age-specific mortality in children in endemic areas of sub-Saharan Africa                                                                                                                                        | Verbal Autopsy     | Kourweogo [rural]                                                                                                                    | 2002                 | birth - 14 years | 1013        |
| Burkina Faso | Causas de la distribución de muerte con el modelo InterVA y la codificación de médicos en un área rural de Burkina Faso                                                                                                      | Verbal Autopsy     | Nouna [rural]                                                                                                                        | 2002                 | All Ages         | 5649        |
| Burkina Faso | Patterns of age-specific mortality in children in endemic areas of sub-Saharan Africa                                                                                                                                        | Verbal Autopsy     | Ooubritenga [rural]                                                                                                                  | 2002                 | birth - 14 years | 1491        |
| Burkina Faso | The epidemiology of pregnancy outcomes in rural Burkina Faso                                                                                                                                                                 | Verbal Autopsy     | Ourgaye and Diapaga districts [rural]                                                                                                | 2004                 | 15 - 49 years    | MMR         |

**Appendix Table 6: Causes of death data source list by geography, source type, and study site, with years, age range, and sample size, excluding sources on lower respiratory infection and diarrhoea etiologies**

| Location      | Source name                                                                                                                                                                        | Source type        | Site                                                                                        | Years            | Ages              | Sample size |
|---------------|------------------------------------------------------------------------------------------------------------------------------------------------------------------------------------|--------------------|---------------------------------------------------------------------------------------------|------------------|-------------------|-------------|
| Burkina Faso  | The high burden of infant deaths in rural Burkina Faso: a prospective community-based cohort study                                                                                 | Verbal Autopsy     | Banfara Health District 24 villages [rural]                                                 | 2007             | birth - 364 days  | 75          |
| Burkina Faso  | An improved method for physician-certified verbal autopsy reduces the rate of discrepancy: experiences in the Nouna Health and Demographic Surveillance Site (NHDSS), Burkina Faso | Verbal Autopsy     | Kossi Province                                                                              | 2009             | All Ages          | 1256        |
| Burkina Faso  | The Kaya HDSS, Burkina Faso: a platform for epidemiological studies and health programme evaluation                                                                                | Verbal Autopsy     | north central region [rural]                                                                | 2009             | birth - 14 years  | 203         |
| Burkina Faso  | The Kaya HDSS, Burkina Faso: a platform for epidemiological studies and health programme evaluation                                                                                | Verbal Autopsy     | north central region [urban]                                                                | 2009             | birth - 14 years  | 347         |
| Cameroon      | United Nations Office on Drugs and Crime Global Study on Homicide 2011                                                                                                             | Police Records     | Cameroon CTS                                                                                | 2006-2007        | All Ages          | Death Rate  |
| Cameroon      | Global Status Report on Road Safety 2009                                                                                                                                           | Police Records     |                                                                                             | 2007             | All Ages          | Death Rate  |
| Cameroon      | Cameroon Demographic and Health Survey - Maternal Mortality Data                                                                                                                   | Sibling History    |                                                                                             | 1984-2011        | 15 - 54 years     | 197         |
| Cape Verde    | United Nations Office on Drugs and Crime Global Study on Homicide 2011                                                                                                             | Police Records     | Cape Verde UN-OCHA                                                                          | 2007             | All Ages          | Death Rate  |
| Cape Verde    | Deaths among women of reproductive age in Cape Verde: causes and avoidability                                                                                                      | Verbal Autopsy     | Santiago Santo Antao Sao Vicente                                                            | 1992             | 15 - 49 years     | 97          |
| Cape Verde    | WHO Mortality Database                                                                                                                                                             | Vital Registration |                                                                                             | 1980, 2011-2012  | All Ages          | 7565        |
| Chad          | Chad Demographic and Health Survey - Maternal Mortality Data                                                                                                                       | Sibling History    |                                                                                             | 1982-2004        | 15 - 34 years     | 21          |
| Cote d'Ivoire | United Nations Office on Drugs and Crime Global Study on Homicide 2011                                                                                                             | Police Records     | Cote d'Ivoire CTS                                                                           | 2007             | All Ages          | Death Rate  |
| Cote d'Ivoire | Côte d'Ivoire Demographic and Health Survey - Maternal Mortality Data                                                                                                              | Sibling History    |                                                                                             | 1980-1994        | 15 - 39 years     | 9           |
| Cote d'Ivoire | Côte d'Ivoire Demographic and Health Survey - Maternal Mortality Data                                                                                                              | Sibling History    |                                                                                             | 1997-2011        | 15 - 44 years     | 254         |
| Cote d'Ivoire | Effet de l'observance des d'approvisionnement en eau et de la therapie par voie orale sur les diarrhees chez les enfants de moins de 5 de la Cote d'Ivoire                         | Verbal Autopsy     | Grand-Alepe Ahoutoue Brofodoume Ahoue [rural]                                               | 1988, 1990, 1992 | birth - 4 years   | 113         |
| Cote d'Ivoire | Demographic Surveillance System (DSS)                                                                                                                                              | Verbal Autopsy     |                                                                                             | 2009-2011        | All Ages          | 844         |
| The Gambia    | United Nations Office on Drugs and Crime Global Study on Homicide 2011                                                                                                             | Police Records     | The Gambia Interpol                                                                         | 2004             | All Ages          | Death Rate  |
| The Gambia    | Demographic and Health Surveys                                                                                                                                                     | Sibling History    |                                                                                             | 1999-2012        | 15 - 44 years     | 57          |
| The Gambia    | A prospective survey of the outcome of pregnancy in a rural area of the Gambia                                                                                                     | Verbal Autopsy     | 41 villages and hamlets near Farafenni in North Bank Division [rural]                       | 1982             | birth - 27 days   | 33          |
| The Gambia    | Deaths in infancy and early childhood in a well-vaccinated, rural, West African population                                                                                         | Verbal Autopsy     | Villages and hamlets near the town of Farafenni [rural]                                     | 1982             | birth - 9 years   | 184         |
| The Gambia    | Sustained protection against mortality and morbidity from malaria in rural Gambian children by chemoprophylaxis given by village health workers                                    | Verbal Autopsy     | 41 villages and hamlets west of Farafenni North Bank [rural]                                | 1982, 1986       | 28 days - 4 years | 151         |
| The Gambia    | The effect of insecticide-treated bed nets on mortality of Gambian children                                                                                                        | Verbal Autopsy     | 73 villages South Bank east of Soma (17 PHC and 56 non-PHC villages) [rural] - control      | 1988-1989        | birth - 4 years   | 296         |
| The Gambia    | The effect of insecticide-treated bed nets on mortality of Gambian children                                                                                                        | Verbal Autopsy     | 73 villages South Bank east of Soma (17 PHC and 56 non-PHC villages) [rural] - intervention | 1989             | birth - 4 years   | 57          |
| The Gambia    | Risk factors for mortality from acute lower respiratory tract infections in young Gambian children                                                                                 | Verbal Autopsy     | Upper River Division [rural]                                                                | 1989             | birth - 4 years   | 273         |
| The Gambia    | Changes in the pattern of infant and childhood mortality in upper river division, The Gambia, from 1989 to 1993                                                                    | Verbal Autopsy     | Upper River Division eastern Gambia [rural]                                                 | 1989-1993        | birth - 4 years   | 3776        |

**Appendix Table 6: Causes of death data source list by geography, source type, and study site, with years, age range, and sample size, excluding sources on lower respiratory infection and diarrhoea etiologies**

| Location   | Source name                                                                                                                                                      | Source type     | Site                                                                   | Years            | Ages              | Sample size |
|------------|------------------------------------------------------------------------------------------------------------------------------------------------------------------|-----------------|------------------------------------------------------------------------|------------------|-------------------|-------------|
| The Gambia | Mortality and morbidity from malaria in Gambian children after introduction of an impregnated bednet programme                                                   | Verbal Autopsy  | Primary Health Care (PHC) Program villages [rural] - control           | 1992             | 1 - 9 years       | 182         |
| The Gambia | Mortality and morbidity from malaria in Gambian children after introduction of an impregnated bednet programme                                                   | Verbal Autopsy  | Primary Health Care (PHC) Program villages [rural] - intervention      | 1992             | 1 - 9 years       | 124         |
| The Gambia | Maternal mortality in rural Gambia: levels, causes and contributing factors                                                                                      | Verbal Autopsy  | Rural areas around Farafenni North Bank Division [rural]               | 1995             | 15 - 49 years     | 74          |
| The Gambia | Demographic Surveillance System (DSS)                                                                                                                            | Verbal Autopsy  |                                                                        | 1998-2007        | All Ages          | 2983        |
| The Gambia | Reaching millennium development goal 4 - the Gambia                                                                                                              | Verbal Autopsy  | 42 villages around the town of Farafenni [rural]                       | 1999, 2002, 2006 | birth - 4 years   | 738         |
| The Gambia | Maternal deaths in rural Gambia                                                                                                                                  | Verbal Autopsy  | Central and Upper River Divisions [rural]                              | 2002             | 15 - 49 years     | MMR         |
| The Gambia | Preventive measures in infancy to reduce under-five mortality: a case-control study in The Gambia                                                                | Verbal Autopsy  | Farafenni villages and urban                                           | 2006             | birth - 4 years   | 141         |
| Ghana      | Global Status Report on Road Safety 2009                                                                                                                         | Police Records  |                                                                        | 2007             | All Ages          | Death Rate  |
| Ghana      | United Nations Office on Drugs and Crime Global Study on Homicide 2011                                                                                           | Police Records  | Ghana National police                                                  | 2009             | All Ages          | Death Rate  |
| Ghana      | Ghana Demographic and Health Survey - Maternal Mortality Data                                                                                                    | Sibling History |                                                                        | 1993-2007        | 15 - 54 years     | 97          |
| Ghana      | Maternal mortality among the Kassena-Nankana of northern Ghana                                                                                                   | Verbal Autopsy  | Northern Region - Kassena-Nankana District                             | 1989             | 15 - 49 years     | 738         |
| Ghana      | Vitamin A supplementation in northern Ghana: effects on clinic attendances, hospital admissions, and child mortality                                             | Verbal Autopsy  | Kassena-Nankana District [rural]                                       | 1990             | 28 days - 9 years | 495         |
| Ghana      | Impact of permethrin impregnated bednets on child mortality in Kassena-Nankana district, Ghana: a randomized controlled trial                                    | Verbal Autopsy  | Kassena-Nankana District [rural] - control                             | 1994             | 28 days - 4 years | 461         |
| Ghana      | Impact of permethrin impregnated bednets on child mortality in Kassena-Nankana district, Ghana: a randomized controlled trial                                    | Verbal Autopsy  | Kassena-Nankana District [rural] - intervention                        | 1994             | 28 days - 4 years | 396         |
| Ghana      | How many years of life could be saved if malaria were eliminated from a hyperendemic area of northern Ghana?                                                     | Verbal Autopsy  | Navrongo Health Research Center Kasena-Nankana district [rural]        | 1995             | 5 years +         | 2870        |
| Ghana      | Trend and causes of neonatal mortality in the Kassena-Nankana district of northern Ghana, 1995-2002                                                              | Verbal Autopsy  | Lassena-Nankana district [rural]                                       | 1998             | birth - 27 days   | 1068        |
| Ghana      | Demographic Surveillance System (DSS)                                                                                                                            | Verbal Autopsy  | Navrongo                                                               | 2000             | All Ages          | 8483        |
| Ghana      | Maternal mortality decline in the Kassena-Nankana district of northern Ghana                                                                                     | Verbal Autopsy  | Kassena-Nankana District [rural]                                       | 2003             | 10 - 49 years     | 516         |
| Ghana      | Aetiology of stillbirths and neonatal deaths in rural Ghana: implications for health programming in developing countries                                         | Verbal Autopsy  | Kintampo Brong Ahafo region [rural]                                    | 2003             | birth - 27 days   | 590         |
| Ghana      | Effect of early infant feeding practices on infection-specific neonatal mortality: an investigation of the causal links with observational data from rural Ghana | Verbal Autopsy  | Kintampo Wenchi Techiman Nkoranza districts Brong Ahafo region [rural] | 2003             | birth - 27 days   | 140         |
| Ghana      | Effect of vitamin A supplementation on cause-specific mortality in women of reproductive age in Ghana: a secondary analysis from the ObaapaViA trial             | Verbal Autopsy  | seven districts of the Brong Ahafo region [rural]                      | 2004             | 15 - 44 years     | 1298        |
| Ghana      | Determinants of epidemiologic transition in rural Africa: the role of socioeconomic status and drinking water source                                             | Verbal Autopsy  | Garu-Tempene district [rural]                                          | 2004, 2007, 2010 | All Ages          | 1253        |
| Ghana      | Demographic Surveillance System (DSS)                                                                                                                            | Verbal Autopsy  |                                                                        | 2004-2011        | All Ages          | 15200       |
| Ghana      | Why are babies dying in the first month after birth? A 7-year study of neonatal mortality in northern Ghana                                                      | Verbal Autopsy  | Kassena-Nankana District [rural]                                       | 2006             | birth - 27 days   | 424         |
| Ghana      | Special Demographic and Health Survey (DHS)                                                                                                                      | Verbal Autopsy  |                                                                        | 2007             | 10 - 49 years     | 4203        |

**Appendix Table 6: Causes of death data source list by geography, source type, and study site, with years, age range, and sample size, excluding sources on lower respiratory infection and diarrhoea etiologies**

| Location      | Source name                                                                                                                | Source type        | Site                                                                       | Years           | Ages              | Sample size |
|---------------|----------------------------------------------------------------------------------------------------------------------------|--------------------|----------------------------------------------------------------------------|-----------------|-------------------|-------------|
| Ghana         | Verbal autopsy: an analysis of the common causes of childhood death in the Barekese sub-district of Ghana                  | Verbal Autopsy     | Barekese sub-district Atwima Nwabiagya district Ashanti [rural]            | 2007            | birth - 4 years   | 117         |
| Ghana         | Ghana - Accra Births and Deaths Registry - Deaths 2000-2007                                                                | Vital Registration |                                                                            | 2000, 2007      | All Ages          | 29437       |
| Guinea        | Guinea Demographic and Health Survey - Maternal Mortality Data                                                             | Sibling History    |                                                                            | 1985-2012       | 15 - 39 years     | 66          |
| Guinea        | Inferred Total Deaths Among Confirmed Ebola Cases 2014-2015                                                                | Surveillance       |                                                                            | 2014-2015       | All Ages          | 187416      |
| Guinea        | Guinea - Mandiana Mortality Study 1998-1999                                                                                | Verbal Autopsy     | Mandiana [rural]                                                           | 1998            | birth - 4 years   | 330         |
| Guinea-Bissau | Global Status Report on Road Safety 2009                                                                                   | Police Records     |                                                                            | 2007            | All Ages          | Death Rate  |
| Guinea-Bissau | Persistent and acute diarrhoea as the leading causes of child mortality in urban Guinea Bissau                             | Verbal Autopsy     | Bandim II [urban]                                                          | 1989            | 28 days - 4 years | 135         |
| Guinea-Bissau | Maternal mortality in Guinea-Bissau: the use of verbal autopsy in a multi-ethnic population                                | Verbal Autopsy     | Clusters of 100 women from each of the 5 northern regions of Guinea-Bissau | 1992            | 15 - 49 years     | 339         |
| Guinea-Bissau | BCG vaccination scar associated with better childhood survival in Guinea-Bissau                                            | Verbal Autopsy     | Bandim I Bandim II Belem Mindara                                           | 1995            | 28 days - 4 years | 114         |
| Liberia       | United Nations Surveys on Crime Trends and the Operations of Criminal Justice Systems 1970-2006                            | Police Records     |                                                                            | 1982-1985       | All Ages          | Death Rate  |
| Liberia       | United Nations Office on Drugs and Crime Global Study on Homicide 2011                                                     | Police Records     | Liberia UN-PKO                                                             | 2007, 2009-2010 | All Ages          | Death Rate  |
| Liberia       | Liberia Demographic and Health Survey - Maternal Mortality Data                                                            | Sibling History    |                                                                            | 1992-2013       | 15 - 44 years     | 58          |
| Liberia       | Inferred Total Deaths Among Confirmed Ebola Cases 2014-2015                                                                | Surveillance       |                                                                            | 2014            | All Ages          | 25704       |
| Liberia       | Infant and child mortality in two counties of Liberia: results of a survey in 1988 and trends since 1984                   | Verbal Autopsy     | Bomi and Grand Cape Mount counties                                         | 1984, 1987      | birth - 4 years   | 949         |
| Liberia       | Application of the verbal autopsy during a clinical trial                                                                  | Verbal Autopsy     | Liberian Agricultural Company (LAC) rubber plantation [rural]              | 1990            | birth - 49 years  | 24          |
| Mali          | Mali Demographic and Health Survey - Maternal Mortality Data                                                               | Sibling History    |                                                                            | 1981-2006       | 15 - 44 years     | 96          |
| Mali          | High maternal mortality estimated by the sisterhood method in a rural area of Mali                                         | Sibling History    | 20 villages in Kita                                                        | 2007            | 15 - 49 years     | 1233        |
| Mali          | Mali Population and Housing Census 2009                                                                                    | Survey/Census      |                                                                            | 2009            | 15 - 49 years     | MMR         |
| Mali          | Assessment of maternal mortality and late maternal mortality among a cohort of pregnant women in Bamako, Mali              | Verbal Autopsy     | Bankoni a district of Bamako [urban]                                       | 1990            | 15 - 49 years     | MMR         |
| Mali          | Mali - Twelve Years of Urban Mortality in the Sahel. Levels, Trends, Seasons, and Causes of Mortality in Bamako, 1974-1985 | Vital Registration | Bamako                                                                     | 1981, 1984      | All Ages          | 24895       |
| Mauritania    | Global Status Report on Road Safety 2009                                                                                   | Police Records     |                                                                            | 2007            | All Ages          | Death Rate  |
| Mauritania    | Demographic and Health Survey (DHS)                                                                                        | Sibling History    |                                                                            | 1986-2000       | 20 - 44 years     | 11          |
| Niger         | Global Status Report on Road Safety 2009                                                                                   | Police Records     |                                                                            | 2007            | All Ages          | Death Rate  |
| Niger         | Niger Demographic and Health Survey - Maternal Mortality Data                                                              | Sibling History    |                                                                            | 1980-2012       | 15 - 49 years     | 540         |
| Niger         | Retrospective determination of whether famine existed in Niger, 2005: two stage cluster survey                             | Verbal Autopsy     | Agadez Diffa Dosso Maradi Tahoua Tillaberi Zinder and Niamey               | 2005            | birth - 4 years   | 5737        |
| Nigeria       | United Nations Surveys on Crime Trends and the Operations of Criminal Justice Systems 1970-2006                            | Police Records     |                                                                            | 1990-1994       | All Ages          | Death Rate  |
| Nigeria       | United Nations Office on Drugs and Crime Global Study on Homicide 2011                                                     | Police Records     | Nigeria NGO (a)                                                            | 1995-2007       | All Ages          | Death Rate  |

**Appendix Table 6: Causes of death data source list by geography, source type, and study site, with years, age range, and sample size, excluding sources on lower respiratory infection and diarrhoea etiologies**

| Location              | Source name                                                                                                                                       | Source type        | Site                              | Years                  | Ages              | Sample size |
|-----------------------|---------------------------------------------------------------------------------------------------------------------------------------------------|--------------------|-----------------------------------|------------------------|-------------------|-------------|
| Nigeria               | Nigeria Demographic and Health Survey - Maternal Mortality Data                                                                                   | Sibling History    |                                   | 1994-2013              | 15 - 44 years     | 42          |
| Nigeria               | Community Study of Maternal Mortality in South West Nigeria: How Applicable is the Sisterhood Method                                              | Sibling History    | Ibadan North                      | 2005                   | 15 - 49 years     | 1130        |
| Nigeria               | Community Study of Maternal Mortality in South West Nigeria: How Applicable is the Sisterhood Method                                              | Sibling History    | Ido                               | 2005                   | 15 - 49 years     | 194         |
| Nigeria               | The use of the sisterhood method for estimating maternal mortality ratio in Lagos state, Nigeria                                                  | Sibling History    | Lagos State                       | 2008                   | 15 - 49 years     | 474         |
| Nigeria               | Childhood diarrhoea in rural Nigeria. I. Studies on prevalence, mortality and socio-environmental factors                                         | Survey/Census      | Akoko North Ondo State [rural]    | 1987                   | birth - 4 years   | 120         |
| Nigeria               | Infant and maternal deaths in rural south west Nigeria: a prospective study                                                                       | Survey/Census      | Lagun [rural]                     | 1995                   | birth - 44 years  | 177         |
| Nigeria               | Community-based surveillance of paediatric deaths in Cross River State, Nigeria                                                                   | Verbal Autopsy     | Nko Cross River State [rural]     | 1991                   | birth - 14 years  | 475         |
| Nigeria               | The Idikan adult mortality study                                                                                                                  | Verbal Autopsy     | Ibadan [urban]                    | 1994                   | 15 years +        | 60          |
| Nigeria               | Aetiology of maternal mortality using verbal autopsy at Sokoto, North-Western Nigeria                                                             | Verbal Autopsy     | Sokoto [urban]                    | 2010                   | 15 - 49 years     | 58          |
| Nigeria               | Health & demographic surveillance system profile: the Nahuche Health and Demographic Surveillance System, Northern Nigeria (Nahuche HDSS)         | Verbal Autopsy     | Zamfara StateNahuche HDSS [rural] | 2012                   | birth - 19 years  | 2100        |
| Nigeria               | Nigeria Report of Livebirths, Deaths and Stillbirths 1994-2007                                                                                    | Vital Registration |                                   | 2007                   | All Ages          | 23882       |
| Sao Tome and Principe | United Nations Surveys on Crime Trends and the Operations of Criminal Justice Systems 1970-2006                                                   | Police Records     |                                   | 1990-1994              | All Ages          | Death Rate  |
| Sao Tome and Principe | Demographic and Health Survey (DHS)                                                                                                               | Sibling History    |                                   | 1994-2008              | 15 - 39 years     | 3           |
| Sao Tome and Principe | WHO Mortality Database                                                                                                                            | Vital Registration |                                   | 1985                   | All Ages          | 3292        |
| Senegal               | United Nations Surveys on Crime Trends and the Operations of Criminal Justice Systems 1970-2006                                                   | Police Records     |                                   | 1980                   | All Ages          | Death Rate  |
| Senegal               | United Nations Office on Drugs and Crime Global Study on Homicide 2011                                                                            | Police Records     | Senegal Interpol                  | 2003-2004              | All Ages          | Death Rate  |
| Senegal               | Senegal Demographic and Health Survey - Maternal Mortality Data                                                                                   | Sibling History    |                                   | 1980-2010              | 15 - 39 years     | 36          |
| Senegal               | Misclassification of pregnancy-related deaths in adult mortality surveys: case study in Senegal                                                   | Surveillance       | Bandafassi                        | 2006                   | 10 - 49 years     | 60          |
| Senegal               | International Integrated Public Use Microdata Series (IPUMS)                                                                                      | Survey/Census      |                                   | 2002                   | All Ages          | 10022       |
| Senegal               | Senegal - Risk of Death Associated with Different Nutritional States in Children of Preschool age: Study Conducted in Niakhar (Senegal) 1983-1986 | Verbal Autopsy     | Niakhar Fatick region [rural]     | 1984                   | 28 days - 4 years | 830         |
| Senegal               | Incidence and duration of severe wasting in two African populations                                                                               | Verbal Autopsy     | Niakhar [rural]                   | 1984                   | 28 days - 4 years | 356         |
| Senegal               | International differences in clinical patterns of diarrhoeal deaths: a comparison of children from Brazil, Senegal, Bangladesh, and India         | Verbal Autopsy     | Niakhar [rural]                   | 1986                   | birth - 4 years   | 1517        |
| Senegal               | Impact of chloroquine resistance on malaria mortality                                                                                             | Verbal Autopsy     | Bandafassi [rural]                | 1986, 1992             | birth - 4 years   | 1167        |
| Senegal               | Childhood mortality and probable causes of death using verbal autopsy in Niakhar, Senegal, 1989-2000                                              | Verbal Autopsy     | Niakhar Fatick [rural]            | 1990, 1993, 1996, 1999 | birth - 14 years  | 3424        |
| Senegal               | Adult mortality in a rural area of Senegal: Non-communicable diseases have a large impact in Mlomp                                                | Verbal Autopsy     | Mlomp [rural]                     | 1994                   | 15 - 59 years     | 363         |
| Senegal               | Demographic Surveillance System (DSS)                                                                                                             | Verbal Autopsy     |                                   | 2005-2010              | All Ages          | 1732        |
| Sierra Leone          | United Nations Office on Drugs and Crime Global Study on Homicide 2011                                                                            | Police Records     | Sierra Leone CTS                  | 2004-2007              | All Ages          | Death Rate  |
| Sierra Leone          | Global Status Report on Road Safety 2009                                                                                                          | Police Records     |                                   | 2007                   | All Ages          | Death Rate  |

**Appendix Table 6: Causes of death data source list by geography, source type, and study site, with years, age range, and sample size, excluding sources on lower respiratory infection and diarrhoea etiologies**

| Location     | Source name                                                                      | Source type     | Site                                    | Years     | Ages            | Sample size |
|--------------|----------------------------------------------------------------------------------|-----------------|-----------------------------------------|-----------|-----------------|-------------|
| Sierra Leone | Demographic and Health Survey (DHS)                                              | Sibling History |                                         | 1994-2013 | 25 - 44 years   | 4           |
| Sierra Leone | Inferred Total Deaths Among Confirmed Ebola Cases 2014-2015                      | Surveillance    |                                         | 2014-2015 | All Ages        | 92503       |
| Sierra Leone | International Integrated Public Use Microdata Series (IPUMS)                     | Survey/Census   |                                         | 2004      | All Ages        | 9070        |
| Sierra Leone | Sierra Leone Census 2004                                                         | Survey/Census   |                                         | 2004      | All Ages        | 99278       |
| Sierra Leone | Female Health and Family Planning in Sierra Leone                                | Survey/Census   |                                         | 2012      | 10 - 49 years   | 232         |
| Sierra Leone | Malaria in a rural area of Sierra Leone. I. Initial results                      | Verbal Autopsy  | 15 villages north of Bo [rural] [rural] | 1990      | birth - 9 years | 37          |
| Sierra Leone | Immunization coverage and child mortality in two rural districts of Sierra Leone | Verbal Autopsy  | Western Area and Porto Loko             | 1993      | birth - 4 years | 559         |
| Togo         | Global Status Report on Road Safety 2009                                         | Police Records  |                                         | 2007      | All Ages        | Death Rate  |
| Togo         | Togo Demographic and Health Survey - Maternal Mortality Data                     | Sibling History |                                         | 1984-2013 | 15 - 49 years   | 97          |











**Appendix Table 7: List of International Classification of Diseases (ICD) codes mapped to the Global Burden of Disease cause list for causes of death**

| Cause                                         | ICD10                                                                                                                                                                                                                                                                                                                                                                                                                                                                                                                                                                                                                                                                                                                                                                                                                                                                                                                                                                                                                                                                                                                                                                                                                                                                                                                                                                                                                                                                                                                                                                                                                                                                                                                                                                                                                                                                                                                                                                                                                                                                                                                                                                                                                                                                                                                                                                                                                                                                                                                                                                                                                                                                                                                                                                                                                                                                                                                                                                                                                                                                                                                                                                                      | ICD9                                                                                                                                                                                                                                                                                                                                                                                                                                                                                                                                                                                                                                                                                                                                                                                                                                                                                                                                                                                                                                                                                                                                                                                                                                                                                                                                                                                                                                                                                                                                                                                                                                                                                                                                                                                                                                                                                                                                                                                                                                                                                                                                                                                                                                                                                                                                                                                                                                                                                                                                                                                                                                                                                                                                                                                                                                                                              |
|-----------------------------------------------|--------------------------------------------------------------------------------------------------------------------------------------------------------------------------------------------------------------------------------------------------------------------------------------------------------------------------------------------------------------------------------------------------------------------------------------------------------------------------------------------------------------------------------------------------------------------------------------------------------------------------------------------------------------------------------------------------------------------------------------------------------------------------------------------------------------------------------------------------------------------------------------------------------------------------------------------------------------------------------------------------------------------------------------------------------------------------------------------------------------------------------------------------------------------------------------------------------------------------------------------------------------------------------------------------------------------------------------------------------------------------------------------------------------------------------------------------------------------------------------------------------------------------------------------------------------------------------------------------------------------------------------------------------------------------------------------------------------------------------------------------------------------------------------------------------------------------------------------------------------------------------------------------------------------------------------------------------------------------------------------------------------------------------------------------------------------------------------------------------------------------------------------------------------------------------------------------------------------------------------------------------------------------------------------------------------------------------------------------------------------------------------------------------------------------------------------------------------------------------------------------------------------------------------------------------------------------------------------------------------------------------------------------------------------------------------------------------------------------------------------------------------------------------------------------------------------------------------------------------------------------------------------------------------------------------------------------------------------------------------------------------------------------------------------------------------------------------------------------------------------------------------------------------------------------------------------|-----------------------------------------------------------------------------------------------------------------------------------------------------------------------------------------------------------------------------------------------------------------------------------------------------------------------------------------------------------------------------------------------------------------------------------------------------------------------------------------------------------------------------------------------------------------------------------------------------------------------------------------------------------------------------------------------------------------------------------------------------------------------------------------------------------------------------------------------------------------------------------------------------------------------------------------------------------------------------------------------------------------------------------------------------------------------------------------------------------------------------------------------------------------------------------------------------------------------------------------------------------------------------------------------------------------------------------------------------------------------------------------------------------------------------------------------------------------------------------------------------------------------------------------------------------------------------------------------------------------------------------------------------------------------------------------------------------------------------------------------------------------------------------------------------------------------------------------------------------------------------------------------------------------------------------------------------------------------------------------------------------------------------------------------------------------------------------------------------------------------------------------------------------------------------------------------------------------------------------------------------------------------------------------------------------------------------------------------------------------------------------------------------------------------------------------------------------------------------------------------------------------------------------------------------------------------------------------------------------------------------------------------------------------------------------------------------------------------------------------------------------------------------------------------------------------------------------------------------------------------------------|
| Interpersonal violence                        | X85-Y08.9, Y87.1                                                                                                                                                                                                                                                                                                                                                                                                                                                                                                                                                                                                                                                                                                                                                                                                                                                                                                                                                                                                                                                                                                                                                                                                                                                                                                                                                                                                                                                                                                                                                                                                                                                                                                                                                                                                                                                                                                                                                                                                                                                                                                                                                                                                                                                                                                                                                                                                                                                                                                                                                                                                                                                                                                                                                                                                                                                                                                                                                                                                                                                                                                                                                                           | E960-E969                                                                                                                                                                                                                                                                                                                                                                                                                                                                                                                                                                                                                                                                                                                                                                                                                                                                                                                                                                                                                                                                                                                                                                                                                                                                                                                                                                                                                                                                                                                                                                                                                                                                                                                                                                                                                                                                                                                                                                                                                                                                                                                                                                                                                                                                                                                                                                                                                                                                                                                                                                                                                                                                                                                                                                                                                                                                         |
| Assault by firearm                            | X93-X94.0, X94.3-X94.7, X94.9-X95.9, X96.5                                                                                                                                                                                                                                                                                                                                                                                                                                                                                                                                                                                                                                                                                                                                                                                                                                                                                                                                                                                                                                                                                                                                                                                                                                                                                                                                                                                                                                                                                                                                                                                                                                                                                                                                                                                                                                                                                                                                                                                                                                                                                                                                                                                                                                                                                                                                                                                                                                                                                                                                                                                                                                                                                                                                                                                                                                                                                                                                                                                                                                                                                                                                                 | E965-E965.4                                                                                                                                                                                                                                                                                                                                                                                                                                                                                                                                                                                                                                                                                                                                                                                                                                                                                                                                                                                                                                                                                                                                                                                                                                                                                                                                                                                                                                                                                                                                                                                                                                                                                                                                                                                                                                                                                                                                                                                                                                                                                                                                                                                                                                                                                                                                                                                                                                                                                                                                                                                                                                                                                                                                                                                                                                                                       |
| Assault by sharp object                       | X99-X99.9                                                                                                                                                                                                                                                                                                                                                                                                                                                                                                                                                                                                                                                                                                                                                                                                                                                                                                                                                                                                                                                                                                                                                                                                                                                                                                                                                                                                                                                                                                                                                                                                                                                                                                                                                                                                                                                                                                                                                                                                                                                                                                                                                                                                                                                                                                                                                                                                                                                                                                                                                                                                                                                                                                                                                                                                                                                                                                                                                                                                                                                                                                                                                                                  | E966                                                                                                                                                                                                                                                                                                                                                                                                                                                                                                                                                                                                                                                                                                                                                                                                                                                                                                                                                                                                                                                                                                                                                                                                                                                                                                                                                                                                                                                                                                                                                                                                                                                                                                                                                                                                                                                                                                                                                                                                                                                                                                                                                                                                                                                                                                                                                                                                                                                                                                                                                                                                                                                                                                                                                                                                                                                                              |
| Assault by other means                        | X85-X92.9, X94.1-X94.2, X94.8, X96-X96.4, X96.6-X98.9, Y00-Y08.9, Y87.1                                                                                                                                                                                                                                                                                                                                                                                                                                                                                                                                                                                                                                                                                                                                                                                                                                                                                                                                                                                                                                                                                                                                                                                                                                                                                                                                                                                                                                                                                                                                                                                                                                                                                                                                                                                                                                                                                                                                                                                                                                                                                                                                                                                                                                                                                                                                                                                                                                                                                                                                                                                                                                                                                                                                                                                                                                                                                                                                                                                                                                                                                                                    | E960-E964, E965.5-E965.9, E967-E969                                                                                                                                                                                                                                                                                                                                                                                                                                                                                                                                                                                                                                                                                                                                                                                                                                                                                                                                                                                                                                                                                                                                                                                                                                                                                                                                                                                                                                                                                                                                                                                                                                                                                                                                                                                                                                                                                                                                                                                                                                                                                                                                                                                                                                                                                                                                                                                                                                                                                                                                                                                                                                                                                                                                                                                                                                               |
| Forces of nature, war, and legal intervention | X33-X38.9, Y35-Y38.893, Y89.0-Y89.1                                                                                                                                                                                                                                                                                                                                                                                                                                                                                                                                                                                                                                                                                                                                                                                                                                                                                                                                                                                                                                                                                                                                                                                                                                                                                                                                                                                                                                                                                                                                                                                                                                                                                                                                                                                                                                                                                                                                                                                                                                                                                                                                                                                                                                                                                                                                                                                                                                                                                                                                                                                                                                                                                                                                                                                                                                                                                                                                                                                                                                                                                                                                                        | E907-E909.9, E970-E979.9, E990-E999.1                                                                                                                                                                                                                                                                                                                                                                                                                                                                                                                                                                                                                                                                                                                                                                                                                                                                                                                                                                                                                                                                                                                                                                                                                                                                                                                                                                                                                                                                                                                                                                                                                                                                                                                                                                                                                                                                                                                                                                                                                                                                                                                                                                                                                                                                                                                                                                                                                                                                                                                                                                                                                                                                                                                                                                                                                                             |
| Exposure to forces of nature                  | X33-X38.9                                                                                                                                                                                                                                                                                                                                                                                                                                                                                                                                                                                                                                                                                                                                                                                                                                                                                                                                                                                                                                                                                                                                                                                                                                                                                                                                                                                                                                                                                                                                                                                                                                                                                                                                                                                                                                                                                                                                                                                                                                                                                                                                                                                                                                                                                                                                                                                                                                                                                                                                                                                                                                                                                                                                                                                                                                                                                                                                                                                                                                                                                                                                                                                  | E907-E909.9                                                                                                                                                                                                                                                                                                                                                                                                                                                                                                                                                                                                                                                                                                                                                                                                                                                                                                                                                                                                                                                                                                                                                                                                                                                                                                                                                                                                                                                                                                                                                                                                                                                                                                                                                                                                                                                                                                                                                                                                                                                                                                                                                                                                                                                                                                                                                                                                                                                                                                                                                                                                                                                                                                                                                                                                                                                                       |
| Collective violence and legal intervention    | Y35-Y38.893, Y89.0-Y89.1                                                                                                                                                                                                                                                                                                                                                                                                                                                                                                                                                                                                                                                                                                                                                                                                                                                                                                                                                                                                                                                                                                                                                                                                                                                                                                                                                                                                                                                                                                                                                                                                                                                                                                                                                                                                                                                                                                                                                                                                                                                                                                                                                                                                                                                                                                                                                                                                                                                                                                                                                                                                                                                                                                                                                                                                                                                                                                                                                                                                                                                                                                                                                                   | E970-E979.9, E990-E999.1                                                                                                                                                                                                                                                                                                                                                                                                                                                                                                                                                                                                                                                                                                                                                                                                                                                                                                                                                                                                                                                                                                                                                                                                                                                                                                                                                                                                                                                                                                                                                                                                                                                                                                                                                                                                                                                                                                                                                                                                                                                                                                                                                                                                                                                                                                                                                                                                                                                                                                                                                                                                                                                                                                                                                                                                                                                          |
| Garbage Code                                  | A01, A14.9, A29, A31-A31.9, A40-A45.9, A47-A48.0, A48.3, A48.8-A49.02, A49.2-A49.9, A59-A59.9, A6<br>A62, A64-A64.0, A71-A73, A74.0, A76, A97, A99-A99.0, B07-B09, B11-B14, B28-B29, B30-B32.4, B34-<br>B46.9, B49-B49.9, B54-B55, B55.1-B55.9, B58-B59.9, B61-B62, B64, B68-B68.9, B73-B74.2, B76-B76.9,<br>B78-B82.9, B83.9-B85.4, B87-B89, B93-B94.0, B94.8-B94.9, B95.6-B99.9, C14-C14.9, C26-C29, C35-<br>C36, C39-C39.9, C42, C46-C46.9, C55-C55.9, C57.9, C59-C6, C63.9, C68, C68.9, C75.9-C80.9, C87, C97-<br>D00.0, D01, D01.4-D02, D02.4-D02.9, D07, D07.3-D07.39, D07.6-D09, D09.1-D09.19, D09.7, D09.9-D10,<br>D10.9, D13, D13.9-D14, D14.4, D17-D21.9, D28, D28.9-D29, D29.9-D30, D30.9, D36.0, D36.9-D37.0,<br>D37.6-D38, D38.6-D39.0, D39.7, D39.9-D40, D40.9-D41, D41.9, D44, D44.9, D46-D46.9, D47.1, D48,<br>D48.7-D49.1, D49.5, D49.7-D49.8, D49.89-D50.0, D50.9, D54, D59, D59.4, D59.8-D59.9, D62-D63.0,<br>D63.8-D64, D64.1-D64.2, D64.8-D65.9, D68, D69.9, D75.9, D79-D85, D87-D88, D89.8-D99, E07.8-E08.9,<br>E15, E16, E17-E19, E34.9-E35.8, E37-E39, E47-E50.9, E62, E64.1, E69, E85.3-E87.70, E87.79-E87.99,<br>E90-E998, F04-F06.1, F06.3-F07.0, F07.2-F09.9, F17-F17.9, F30-F50, F50.8-G00, G00.9-G02.8, G03.9, G06<br>G09.9, G15-G19, G27-G29, G32-G34, G38-G39, G42-G44.89, G47-G47.29, G47.4-G60.9, G62-G69, G74-<br>G89.4, G91-G93.6, G93.8-G94.8, G96-G96.9, G98-H05, H05.12-H09.93, H71-H79, I00.0, I03-I04, I10-I10.9<br>I14-I19, I26-I27.0, I27.2-I27.9, I28.9-I29.9, I31.2-I31.4, I44-I46.9, I49-I51, I51.6-I59, I62, I62.1-I62.9, I64-<br>I64.9, I67, I67.4, I67.8-I68, I68.8-I69, I69.4-I70.1, I70.8-I70.92, I74-I76, I90, I92-I95.1, I95.8-I96.9, I98.4-<br>I98.8, I99-I00.0, J02, J02.8-J03, J03.8-J04, J04.1-J04.31, J05.1-J05.10, J06-J08, J15.9, J17-J19.6, J22-J29,<br>J48-J59, J64-J64.9, J69-J69.9, J71-J81.9, J83, J85-J90.9, J93-J94.9, J96-K19, K30, K31.9-K34, K39, K47-<br>K49, K53-K54, K63-K63.4, K63.8-K63.9, K65-K66.1, K66.9, K69, K71-K71.2, K71.6, K71.8-K72.01, K75-<br>K75.1, K78-K79, K84, K87-K89, K92-K92.2, K92.9-K93, K93.1-K93.8, K96-K99, L06-L07, L09, L15-<br>L50.9, L52-L87.9, L90-L92.9, L94-L96, L98.5-L99.8, M04, M10-M12.09, M12.2-M29, M37-M39, M43.2-<br>M49, M49.2-M64, M65.1-M71, M71.2-M73, M73.8-M79.9, M83-M86.29, M86.5-M86.9, M87.2-M87.9,<br>M89.1-M89.49, M90-M99.9, N09, N13-N13.9, N17-N17.9, N19-N19.9, N24, N32.1-N32.2, N32.8-N33.8,<br>N35-N35.9, N37-N38, N39.3-N40.9, N42-N43.42, N44.1-N44.8, N46-N48.9, N50-N59, N61-N64.9, N66-<br>N69, N78-N79, N82-N82.9, N84, N84.2-N86, N88-N95.9, N97-N97.9, O08-O08.9, O17-O19, O27, O37-<br>O39, O49-O59, O78-O79, O93-O95.9, P06, P16-P18, P23, P23.5-P23.9, P30-P34.2, P37.3-P37.4, P40-P49,<br>P62-P69, P73, P79, P82, P85-P89, P96.9-P99.9, Q08-Q10.3, Q19, Q29, Q36.0-Q36.9, Q46-Q49, Q88,<br>Q89.9, Q94, Q99.9-R19.6, R19.8-R50.1, R50.8-R50.81, R50.84-R72.9, R74-R78, R78.6-R94.8, R95.0-<br>T71.161, T71.163-U03, U05-U99, V87-V87.1, V87.4-V88.1, V88.4-V89.9, V99-V99.0, W47-W48, W63,<br>W71-W72, W76-W76.9, W82, W95-W97, W98, X07, X40-X44.9, X47.0, X47.9, X49-X49.9, X55-X56, X59<br>X59.9, Y09-Y34.9, Y85-Y87, Y87.2, Y89, Y89.9 | 000-000.9, 002, 031-031.9, 038-038.9, 039.6, 040.0, 041.1-041.9, 067-069, 076-078.3, 078.8-078.9,<br>079.8-079.99, 084, 084.6, 085, 085.1-085.9, 089-089.9, 105-119, 125-125.3, 126-126.9, 127.2-127.9,<br>130-132.9, 133.8-134.9, 136.3-136.5, 136.8-136.9, 139.1-139.9, 149-149.9, 159-159.9, 165-169, 176-<br>179.9, 183.9-184, 184.5, 184.9, 187, 187.9, 189, 189.9, 194.9-199.9, 209, 209.2-209.20, 209.29-<br>209.30, 209.6-209.60, 209.62, 209.69-210, 211, 211.9-212, 212.9, 214-216.9, 221, 221.9-222, 222.9-<br>223, 223.9, 229, 229.1, 229.9-230.0, 230.9-231, 231.8-231.9, 233, 233.3-233.30, 233.39, 233.6, 233.9-<br>234, 234.9-235, 235.1-235.3, 235.5, 235.9-236, 236.3, 236.6, 236.9-236.90, 237.4, 238, 238.6-239.1,<br>239.5, 239.7-239.9, 244, 244.9, 247-249.91, 264-264.9, 274-274.9, 276.0-276.9, 277.3-277.39, 278,<br>279-280.0, 280.9-281, 285-285.9, 286.6, 289.8-289.9, 293-294.0, 296-302.9, 304, 304.9-304.93, 306-<br>307.0, 307.2-307.50, 307.52-307.53, 307.59-320, 320.9, 324-327.19, 328-329, 331.3-331.4, 338-<br>339.89, 342-344.9, 346-348.9, 349.81-353.5, 354-355.9, 357, 357.8-357.9, 360-376, 376.10-380.9,<br>384-389.9, 399-401.9, 405-409.4, 415-416.0, 416.2-416.9, 418-419.9, 423.0, 426-426.9, 427.4-427.5,<br>427.9-429, 429.2-429.9, 436-437, 437.3, 437.9-440.9, 444-445.89, 458-458.9, 459.0, 459.5-460.9, 462-<br>464, 464.00, 464.1-464.10, 464.20, 464.3-464.30, 464.5-464.51, 465-465.9, 482.9-483, 484, 484.8-<br>486.9, 505-505.9, 507-507.9, 510-514.9, 515.0-515.9, 518-518.53, 518.8-518.89, 519, 519.8-529.9,<br>536.2-536.3, 536.8-536.9, 537.7, 537.89-537.9, 544-549, 553.8-553.9, 559-559.0, 560.4-560.7, 561,<br>562.2-563, 564.8-564.9, 567-569, 569.49, 569.79-569.83, 569.86-570.9, 572-572.2, 573, 573.5, 578-<br>578.9, 584-584.9, 586-587.9, 591-591.9, 593.9, 599.7-599.72, 599.9-600.91, 603-603.9, 605-608.1,<br>608.3-609, 611-612.1, 615-616.9, 619-619.9, 621-621.35, 622-622.2, 622.8-628.9, 629.89-629.9, 637-<br>637.92, 639-639.9, 690-693.9, 695.8-706.9, 708-709.9, 712-713.8, 714.4, 715-716, 716.1-728.85,<br>728.87, 728.89-730.09, 730.2-730.39, 730.7-731.9, 733, 733.2-739.9, 749.1-749.14, 759, 759.9,<br>770.0, 779.9-780.56, 780.58, 780.6-780.61, 780.64-786.02, 786.04-787.04, 787.2-787.9, 787.99-788,<br>788.1-790.1, 790.29, 790.4-797.9, 798.1-E80, E800.8-E800.9, E801.8-E801.9, E802.8-E802.9,<br>E803.8-E803.9, E804.8-E804.9, E805.8-E805.9, E806.8-E806.9, E807.8-E807.9, E810.8-E810.9, E811.8-<br>E812, E812.8-E813, E813.8-E814, E814.8-E815, E815.8-E816, E816.8-E817, E817.8-E818, E818.8-<br>E819, E819.8-E820, E820.8-E821, E821.8-E822, E822.8-E823, E823.8-E824, E824.8-E825, E825.8-<br>E826, E826.8-E827, E827.8-E828, E828.8-E829, E829.8-E83, E839, E85, E855-E855.99, E858-<br>E859, E87, E877, E88, E887-E887.09, E928.9-E929.0, E929.8-E929.9, E980-E989 |
| Still Born                                    | P95-P95.9                                                                                                                                                                                                                                                                                                                                                                                                                                                                                                                                                                                                                                                                                                                                                                                                                                                                                                                                                                                                                                                                                                                                                                                                                                                                                                                                                                                                                                                                                                                                                                                                                                                                                                                                                                                                                                                                                                                                                                                                                                                                                                                                                                                                                                                                                                                                                                                                                                                                                                                                                                                                                                                                                                                                                                                                                                                                                                                                                                                                                                                                                                                                                                                  | 768.0-768.1                                                                                                                                                                                                                                                                                                                                                                                                                                                                                                                                                                                                                                                                                                                                                                                                                                                                                                                                                                                                                                                                                                                                                                                                                                                                                                                                                                                                                                                                                                                                                                                                                                                                                                                                                                                                                                                                                                                                                                                                                                                                                                                                                                                                                                                                                                                                                                                                                                                                                                                                                                                                                                                                                                                                                                                                                                                                       |

**Appendix Table 8: Restrictions on age and sex by cause for GBD 2015**

| Cause Name                                               | Minimum Age | Maximum Age | Sex Restriction |
|----------------------------------------------------------|-------------|-------------|-----------------|
| HIV/AIDS and tuberculosis                                | 28 days     |             |                 |
| Tuberculosis                                             | 28 days     |             |                 |
| HIV/AIDS                                                 | 28 days     |             |                 |
| HIV/AIDS - Tuberculosis                                  | 28 days     |             |                 |
| HIV/AIDS resulting in other diseases                     | 28 days     |             |                 |
| Intestinal infectious diseases                           | 28 days     |             |                 |
| Typhoid fever                                            | 28 days     |             |                 |
| Paratyphoid fever                                        | 28 days     |             |                 |
| Other intestinal infectious diseases                     | 28 days     |             |                 |
| Diphtheria                                               | 28 days     | 59 years    |                 |
| Whooping cough                                           | 28 days     | 59 years    |                 |
| Measles                                                  | 28 days     | 59 years    |                 |
| Malaria                                                  | 7 days      |             |                 |
| Chagas disease                                           | 28 days     |             |                 |
| Leishmaniasis                                            | 28 days     |             |                 |
| Visceral leishmaniasis                                   | 28 days     |             |                 |
| African trypanosomiasis                                  | 1 years     |             |                 |
| Schistosomiasis                                          | 28 days     |             |                 |
| Cystic echinococcosis                                    | 1 years     |             |                 |
| Dengue                                                   | 28 days     |             |                 |
| Yellow fever                                             | 7 days      |             |                 |
| Rabies                                                   | 28 days     |             |                 |
| Intestinal nematode infections                           | 28 days     |             |                 |
| Ascariasis                                               | 28 days     |             |                 |
| Maternal disorders                                       | 10 years    | 54 years    | Females Only    |
| Maternal hemorrhage                                      | 10 years    | 54 years    | Females Only    |
| Maternal sepsis and other maternal infections            | 10 years    | 54 years    | Females Only    |
| Maternal hypertensive disorders                          | 10 years    | 54 years    | Females Only    |
| Maternal obstructed labor and uterine rupture            | 10 years    | 54 years    | Females Only    |
| Maternal abortion, miscarriage, and ectopic pregnancy    | 10 years    | 54 years    | Females Only    |
| Indirect maternal deaths                                 | 10 years    | 54 years    | Females Only    |
| Late maternal deaths                                     | 10 years    | 54 years    | Females Only    |
| Maternal deaths aggravated by HIV/AIDS                   | 10 years    | 54 years    | Females Only    |
| Other maternal disorders                                 | 10 years    | 54 years    | Females Only    |
| Neonatal disorders                                       |             | 4 years     |                 |
| Neonatal preterm birth complications                     |             | 4 years     |                 |
| Neonatal encephalopathy due to birth asphyxia and trauma |             | 4 years     |                 |
| Neonatal sepsis and other neonatal infections            |             | 4 years     |                 |
| Hemolytic disease and other neonatal jaundice            |             | 4 years     |                 |
| Other neonatal disorders                                 |             | 4 years     |                 |
| Nutritional deficiencies                                 | 28 days     |             |                 |
| Protein-energy malnutrition                              | 28 days     |             |                 |
| Iodine deficiency                                        | 28 days     |             |                 |
| Iron-deficiency anemia                                   | 28 days     |             |                 |
| Other nutritional deficiencies                           | 28 days     |             |                 |
| Chlamydial infection                                     | 10 years    |             |                 |
| Gonococcal infection                                     | 10 years    |             |                 |
| Other sexually transmitted diseases                      | 10 years    |             |                 |
| Hepatitis                                                | 28 days     |             |                 |
| Acute hepatitis A                                        | 28 days     |             |                 |
| Acute hepatitis B                                        | 28 days     |             |                 |

**Appendix Table 8: Restrictions on age and sex by cause for GBD 2015**

| Cause Name                                                    | Minimum Age | Maximum Age | Sex Restriction |
|---------------------------------------------------------------|-------------|-------------|-----------------|
| Acute hepatitis C                                             | 5 years     |             |                 |
| Acute hepatitis E                                             | 1 years     |             |                 |
| Lip and oral cavity cancer                                    | 15 years    |             |                 |
| Nasopharynx cancer                                            | 5 years     |             |                 |
| Other pharynx cancer                                          | 15 years    |             |                 |
| Esophageal cancer                                             | 15 years    |             |                 |
| Stomach cancer                                                | 15 years    |             |                 |
| Colon and rectum cancer                                       | 15 years    |             |                 |
| Liver cancer                                                  | 5 years     |             |                 |
| Liver cancer due to hepatitis B                               | 5 years     |             |                 |
| Liver cancer due to hepatitis C                               | 5 years     |             |                 |
| Liver cancer due to alcohol use                               | 15 years    |             |                 |
| Liver cancer due to other causes                              | 5 years     |             |                 |
| Gallbladder and biliary tract cancer                          | 15 years    |             |                 |
| Pancreatic cancer                                             | 15 years    |             |                 |
| Larynx cancer                                                 | 15 years    |             |                 |
| Tracheal, bronchus, and lung cancer                           | 15 years    |             |                 |
| Malignant skin melanoma                                       | 15 years    |             |                 |
| Non-melanoma skin cancer                                      | 15 years    |             |                 |
| Non-melanoma skin cancer (squamous-cell carcinoma)            | 15 years    |             |                 |
| Breast cancer                                                 | 15 years    |             |                 |
| Cervical cancer                                               | 15 years    |             | Females Only    |
| Uterine cancer                                                | 15 years    |             | Females Only    |
| Ovarian cancer                                                | 15 years    |             | Females Only    |
| Prostate cancer                                               | 15 years    |             | Males Only      |
| Testicular cancer                                             | 15 years    |             | Males Only      |
| Bladder cancer                                                | 15 years    |             |                 |
| Thyroid cancer                                                | 10 years    |             |                 |
| Mesothelioma                                                  | 15 years    |             |                 |
| Multiple myeloma                                              | 15 years    |             |                 |
| Chronic lymphoid leukemia                                     | 15 years    |             |                 |
| Chronic myeloid leukemia                                      | 15 years    |             |                 |
| Rheumatic heart disease                                       | 1 years     |             |                 |
| Ischemic heart disease                                        | 28 days     |             |                 |
| Ischemic stroke                                               | 28 days     |             |                 |
| Hypertensive heart disease                                    | 28 days     |             |                 |
| Atrial fibrillation and flutter                               | 30 years    |             |                 |
| Aortic aneurysm                                               | 15 years    |             |                 |
| Peripheral vascular disease                                   | 40 years    |             |                 |
| Chronic obstructive pulmonary disease                         | 28 days     |             |                 |
| Pneumoconiosis                                                | 15 years    |             |                 |
| Silicosis                                                     | 15 years    |             |                 |
| Asbestosis                                                    | 15 years    |             |                 |
| Coal workers pneumoconiosis                                   | 15 years    |             |                 |
| Other pneumoconiosis                                          | 15 years    |             |                 |
| Asthma                                                        | 1 years     |             |                 |
| Interstitial lung disease and pulmonary sarcoidosis           | 1 years     |             |                 |
| Cirrhosis and other chronic liver diseases                    | 1 years     |             |                 |
| Cirrhosis and other chronic liver diseases due to hepatitis B | 1 years     |             |                 |
| Cirrhosis and other chronic liver diseases due to hepatitis C | 1 years     |             |                 |
| Cirrhosis and other chronic liver diseases due to alcohol use | 15 years    |             |                 |

**Appendix Table 8: Restrictions on age and sex by cause for GBD 2015**

| Cause Name                                                     | Minimum Age | Maximum Age | Sex Restriction |
|----------------------------------------------------------------|-------------|-------------|-----------------|
| Cirrhosis and other chronic liver diseases due to other causes | 1 years     |             |                 |
| Peptic ulcer disease                                           | 1 years     |             |                 |
| Gastritis and duodenitis                                       | 1 years     |             |                 |
| Appendicitis                                                   | 1 years     |             |                 |
| Inguinal, femoral, and abdominal hernia                        | 1 years     |             |                 |
| Inflammatory bowel disease                                     | 1 years     |             |                 |
| Vascular intestinal disorders                                  | 1 years     |             |                 |
| Gallbladder and biliary diseases                               | 1 years     |             |                 |
| Pancreatitis                                                   | 1 years     |             |                 |
| Other digestive diseases                                       | 1 years     |             |                 |
| Neurological disorders                                         | 28 days     |             |                 |
| Alzheimer disease and other dementias                          | 40 years    |             |                 |
| Parkinson disease                                              | 20 years    |             |                 |
| Epilepsy                                                       | 28 days     |             |                 |
| Multiple sclerosis                                             | 20 years    |             |                 |
| Other neurological disorders                                   | 28 days     |             |                 |
| Schizophrenia                                                  | 25 years    |             |                 |
| Alcohol use disorders                                          | 15 years    |             |                 |
| Eating disorders                                               | 5 years     | 59 years    |                 |
| Anorexia nervosa                                               | 5 years     | 59 years    |                 |
| Bulimia nervosa                                                | 5 years     | 59 years    |                 |
| Acute glomerulonephritis                                       | 28 days     |             |                 |
| Chronic kidney disease                                         | 28 days     |             |                 |
| Chronic kidney disease due to diabetes mellitus                | 28 days     |             |                 |
| Chronic kidney disease due to hypertension                     | 28 days     |             |                 |
| Chronic kidney disease due to glomerulonephritis               | 28 days     |             |                 |
| Chronic kidney disease due to other causes                     | 28 days     |             |                 |
| Urolithiasis                                                   | 5 years     |             |                 |
| Gynecological diseases                                         | 15 years    |             | Females Only    |
| Uterine fibroids                                               | 15 years    |             | Females Only    |
| Polycystic ovarian syndrome                                    | 15 years    | 54 years    | Females Only    |
| Endometriosis                                                  | 15 years    | 54 years    | Females Only    |
| Genital prolapse                                               | 15 years    |             | Females Only    |
| Other gynecological diseases                                   | 15 years    |             | Females Only    |
| Musculoskeletal disorders                                      | 5 years     |             |                 |
| Rheumatoid arthritis                                           | 5 years     |             |                 |
| Other musculoskeletal disorders                                | 5 years     |             |                 |
| Cleft lip and cleft palate                                     |             | 4 years     |                 |
| Skin and subcutaneous diseases                                 | 28 days     |             |                 |
| Cellulitis                                                     | 28 days     |             |                 |
| Pyoderma                                                       | 28 days     |             |                 |
| Decubitus ulcer                                                | 1 years     |             |                 |
| Other skin and subcutaneous diseases                           | 28 days     |             |                 |
| Sudden infant death syndrome                                   | 7 days      | 364 days    |                 |
| Self-harm                                                      | 5 years     |             |                 |

**Appendix Table 9: HIV-related garbage code redistribution packages**

| Package name                | ICD9 codes                                                                                                                                                                                                                   | ICD10 codes                                                                                                                                                                |
|-----------------------------|------------------------------------------------------------------------------------------------------------------------------------------------------------------------------------------------------------------------------|----------------------------------------------------------------------------------------------------------------------------------------------------------------------------|
| Infectious 1                | 039, 039.0, 039.1, 039.2, 039.3, 039.4, 039.6, 039.8, 039.9, 113, 113.2, 113.4, 113.5, 113.6                                                                                                                                 | A42, A42.0, A42.1, A42.2, A42.7, A42.8, A42.81, A42.82, A42.89, A42.9                                                                                                      |
| Infectious 2                | 088.0, 088.2, 088.3, 088.5, 088.7                                                                                                                                                                                            | A44, A44.0, A44.1, A44.8, A44.9                                                                                                                                            |
| Infectious 3                | 112, 112.0, 112.1, 112.2, 112.3, 112.4, 112.5, 112.6, 112.8, 112.81, 112.82, 112.83, 112.84, 112.85, 112.89, 112.9                                                                                                           | B37, B37.0, B37.1, B37.2, B37.3, B37.4, B37.41, B37.42, B37.49, B37.5, B37.6, B37.7, B37.8, B37.81, B37.82, B37.83, B37.84, B37.89, B37.9                                  |
| Infectious 4                | 114, 114.0, 114.1, 114.2, 114.3, 114.4, 114.5, 114.6, 114.9                                                                                                                                                                  | B38, B38.0, B38.1, B38.2, B38.3, B38.4, B38.7, B38.8, B38.81, B38.89, B38.9                                                                                                |
| Infectious 5                | 115, 115.0, 115.00, 115.01, 115.02, 115.03, 115.04, 115.05, 115.09, 115.1, 115.10, 115.11, 115.12, 115.13, 115.14, 115.15, 115.19, 115.2, 115.3, 115.4, 115.5, 115.9, 115.90, 115.91, 115.92, 115.93, 115.94, 115.95, 115.99 | B39, B39.0, B39.1, B39.2, B39.3, B39.4, B39.5, B39.9                                                                                                                       |
| Infectious 6                | 116, 116.0, 116.2, 116.3, 116.4, 116.5, 116.6, 116.9                                                                                                                                                                         | B40, B40.0, B40.1, B40.2, B40.3, B40.7, B40.8, B40.81, B40.89, B40.9                                                                                                       |
| Infectious 7                | 116.1                                                                                                                                                                                                                        | B41, B41.0, B41.7, B41.8, B41.9                                                                                                                                            |
| Infectious 8                | 117.1                                                                                                                                                                                                                        | B42, B42.0, B42.1, B42.7, B42.8, B42.81, B42.82, B42.89, B42.9, B43, B43.0, B43.1, B43.2, B43.8, B43.9                                                                     |
| Infectious 9                | 117.3                                                                                                                                                                                                                        | B44, B44.0, B44.1, B44.2, B44.7, B44.8, B44.81, B44.89, B44.9                                                                                                              |
| Infectious 10               | 117.7                                                                                                                                                                                                                        | B46, B46.0, B46.1, B46.2, B46.3, B46.4, B46.5, B46.8, B46.9                                                                                                                |
| Infectious 11               | 130, 130.0, 130.1, 130.2, 130.3, 130.4, 130.5, 130.6, 130.7, 130.8, 130.9                                                                                                                                                    | B58, B58.0, B58.00, B58.01, B58.09, B58.1, B58.2, B58.3, B58.8, B58.81, B58.82, B58.83, B58.89, B58.9                                                                      |
| Infectious 12               | 136.3, 136.4, 136.5                                                                                                                                                                                                          | B59, B59.0, B59.9                                                                                                                                                          |
| Infectious 13               | 117.5                                                                                                                                                                                                                        | B45, B45.0, B45.1, B45.2, B45.3, B45.7, B45.8, B45.9                                                                                                                       |
| Infectious 14               | 117.2                                                                                                                                                                                                                        | A43, A43.0, A43.1, A43.8, A43.9                                                                                                                                            |
| Infectious 15               | 117, 117.0, 117.4, 117.6, 117.8, 117.9, 118, 118.0, 118.1, 118.2, 118.3, 118.4, 118.5, 118.6, 118.9                                                                                                                          | B49, B49.5, B49.9                                                                                                                                                          |
| Infectious 16               | 085.1, 085.2, 085.3, 085.4, 085.5                                                                                                                                                                                            | B55.1, B55.2                                                                                                                                                               |
| Infectious 17               | 031, 031.0, 031.1, 031.2, 031.8, 031.9                                                                                                                                                                                       | A31, A31.0, A31.1, A31.2, A31.8, A31.9                                                                                                                                     |
| Immunodeficiency - antibody | 279.0, 279.00, 279.01, 279.02, 279.03, 279.04, 279.05, 279.06, 279.09, 279.1                                                                                                                                                 | D80, D80.0, D80.1, D80.2, D80.3, D80.4, D80.5, D80.6, D80.7, D80.8, D80.9                                                                                                  |
| Immunodeficiency - WBC      | 279.10, 279.11, 279.12, 279.13, 279.19, 279.2, 279.3, 279.4, 279.41, 279.49                                                                                                                                                  | D81, D81.0, D81.1, D81.2, D81.3, D81.4, D81.5, D81.6, D81.7, D81.8, D81.81, D81.810, D81.818, D81.819, D81.89, D81.9, D82, D82.0, D82.1, D82.2, D82.3, D82.4, D82.8, D82.9 |
| Immunodeficiency - other    | 279, 279.5, 279.50, 279.51, 279.52, 279.53, 279.6, 279.8, 279.9                                                                                                                                                              | D83, D83.0, D83.1, D83.2, D83.8, D83.9, D84, D84.0, D84.1, D84.8, D84.9, D89.8, D89.81, D89.810, D89.811, D89.812, D89.813, D89.82, D89.89, D89.9                          |
| Kaposi's sarcoma            | 176, 176.0, 176.1, 176.2, 176.3, 176.4, 176.5, 176.8, 176.9                                                                                                                                                                  | C46, C46.0, C46.1, C46.2, C46.3, C46.4, C46.5, C46.50, C46.51, C46.52, C46.7, C46.8, C46.9                                                                                 |

**Appendix Table 10: CODEm covariates used, level of covariate, and expected direction of covariate by cause, sex, and age**

| Cause        | Sex    | Age start     | Age end | Model type | Direction | Covariate                                           |
|--------------|--------|---------------|---------|------------|-----------|-----------------------------------------------------|
| Tuberculosis | Male   | Post Neonatal | 80 plus | Global     | -1        | Education (years per capita)                        |
| Tuberculosis | Male   | Post Neonatal | 80 plus | Global     | -1        | Health System Access 2 (unitless)                   |
| Tuberculosis | Male   | Post Neonatal | 80 plus | Global     | -1        | LDI (IS per capita)                                 |
| Tuberculosis | Male   | Post Neonatal | 80 plus | Global     | -1        | Sociodemographic Status                             |
| Tuberculosis | Male   | Post Neonatal | 80 plus | Global     | 1         | Alcohol (litres per capita)                         |
| Tuberculosis | Male   | Post Neonatal | 80 plus | Global     | 1         | Diabetes Fasting Plasma Glucose (mmol/L)            |
| Tuberculosis | Male   | Post Neonatal | 80 plus | Global     | 1         | Indoor Air Pollution (All Cooking Fuels)            |
| Tuberculosis | Male   | Post Neonatal | 80 plus | Global     | 1         | Log-transformed SEV scalar: TB                      |
| Tuberculosis | Male   | Post Neonatal | 80 plus | Global     | 1         | Malnutrition (proportion <2SD weight for age)       |
| Tuberculosis | Male   | Post Neonatal | 80 plus | Global     | 1         | Population Density (500-1000 ppl/sqkm, proportion)  |
| Tuberculosis | Male   | Post Neonatal | 80 plus | Global     | 1         | Population Density (over 1000 ppl/sqkm, proportion) |
| Tuberculosis | Male   | Post Neonatal | 80 plus | Global     | 1         | Smoking Prevalence                                  |
| Tuberculosis | Male   | Post Neonatal | 80 plus | Data Rich  | -1        | Education (years per capita)                        |
| Tuberculosis | Male   | Post Neonatal | 80 plus | Data Rich  | -1        | Health System Access 2 (unitless)                   |
| Tuberculosis | Male   | Post Neonatal | 80 plus | Data Rich  | -1        | LDI (IS per capita)                                 |
| Tuberculosis | Male   | Post Neonatal | 80 plus | Data Rich  | -1        | Sociodemographic Status                             |
| Tuberculosis | Male   | Post Neonatal | 80 plus | Data Rich  | 1         | Alcohol (litres per capita)                         |
| Tuberculosis | Male   | Post Neonatal | 80 plus | Data Rich  | 1         | Cumulative Cigarettes (5 Years)                     |
| Tuberculosis | Male   | Post Neonatal | 80 plus | Data Rich  | 1         | Diabetes Fasting Plasma Glucose (mmol/L)            |
| Tuberculosis | Male   | Post Neonatal | 80 plus | Data Rich  | 1         | Indoor Air Pollution (All Cooking Fuels)            |
| Tuberculosis | Male   | Post Neonatal | 80 plus | Data Rich  | 1         | Log-transformed SEV scalar: TB                      |
| Tuberculosis | Male   | Post Neonatal | 80 plus | Data Rich  | 1         | Malnutrition (proportion <2SD weight for age)       |
| Tuberculosis | Male   | Post Neonatal | 80 plus | Data Rich  | 1         | Population Density (500-1000 ppl/sqkm, proportion)  |
| Tuberculosis | Male   | Post Neonatal | 80 plus | Data Rich  | 1         | Population Density (over 1000 ppl/sqkm, proportion) |
| Tuberculosis | Male   | Post Neonatal | 80 plus | Data Rich  | 1         | Smoking Prevalence                                  |
| Tuberculosis | Female | Post Neonatal | 80 plus | Global     | -1        | Education (years per capita)                        |
| Tuberculosis | Female | Post Neonatal | 80 plus | Global     | -1        | Health System Access 2 (unitless)                   |
| Tuberculosis | Female | Post Neonatal | 80 plus | Global     | -1        | LDI (IS per capita)                                 |
| Tuberculosis | Female | Post Neonatal | 80 plus | Global     | -1        | Sociodemographic Status                             |
| Tuberculosis | Female | Post Neonatal | 80 plus | Global     | 1         | Alcohol (litres per capita)                         |
| Tuberculosis | Female | Post Neonatal | 80 plus | Global     | 1         | Diabetes Fasting Plasma Glucose (mmol/L)            |
| Tuberculosis | Female | Post Neonatal | 80 plus | Global     | 1         | Indoor Air Pollution (All Cooking Fuels)            |
| Tuberculosis | Female | Post Neonatal | 80 plus | Global     | 1         | Log-transformed SEV scalar: TB                      |
| Tuberculosis | Female | Post Neonatal | 80 plus | Global     | 1         | Malnutrition (proportion <2SD weight for age)       |
| Tuberculosis | Female | Post Neonatal | 80 plus | Global     | 1         | Population Density (500-1000 ppl/sqkm, proportion)  |
| Tuberculosis | Female | Post Neonatal | 80 plus | Global     | 1         | Population Density (over 1000 ppl/sqkm, proportion) |
| Tuberculosis | Female | Post Neonatal | 80 plus | Global     | 1         | Smoking Prevalence                                  |
| Tuberculosis | Female | Post Neonatal | 80 plus | Data Rich  | -1        | Education (years per capita)                        |
| Tuberculosis | Female | Post Neonatal | 80 plus | Data Rich  | -1        | Health System Access 2 (unitless)                   |
| Tuberculosis | Female | Post Neonatal | 80 plus | Data Rich  | -1        | LDI (IS per capita)                                 |
| Tuberculosis | Female | Post Neonatal | 80 plus | Data Rich  | -1        | Sociodemographic Status                             |
| Tuberculosis | Female | Post Neonatal | 80 plus | Data Rich  | 1         | Alcohol (litres per capita)                         |
| Tuberculosis | Female | Post Neonatal | 80 plus | Data Rich  | 1         | Cumulative Cigarettes (5 Years)                     |
| Tuberculosis | Female | Post Neonatal | 80 plus | Data Rich  | 1         | Diabetes Fasting Plasma Glucose (mmol/L)            |



**Appendix Table 10: CODEm covariates used, level of covariate, and expected direction of covariate by cause, sex, and age**

| Cause              | Sex    | Age start      | Age end | Model type | Direction | Covariate                                           |
|--------------------|--------|----------------|---------|------------|-----------|-----------------------------------------------------|
| Tuberculosis       | Female | Post Neonatal  | 80 plus | Data Rich  | 1         | Indoor Air Pollution (All Cooking Fuels)            |
| Tuberculosis       | Female | Post Neonatal  | 80 plus | Data Rich  | 1         | Log-transformed SEV scalar: TB                      |
| Tuberculosis       | Female | Post Neonatal  | 80 plus | Data Rich  | 1         | Malnutrition (proportion <2SD weight for age)       |
| Tuberculosis       | Female | Post Neonatal  | 80 plus | Data Rich  | 1         | Population Density (500-1000 ppl/sqkm, proportion)  |
| Tuberculosis       | Female | Post Neonatal  | 80 plus | Data Rich  | 1         | Population Density (over 1000 ppl/sqkm, proportion) |
| Tuberculosis       | Female | Post Neonatal  | 80 plus | Data Rich  | 1         | Smoking Prevalence                                  |
| Diarrheal diseases | Male   | 5 to 9         | 80 plus | Global     | -1        | Education (years per capita)                        |
| Diarrheal diseases | Male   | Early Neonatal | 1 to 4  | Global     | -1        | Education (years per capita)                        |
| Diarrheal diseases | Male   | 5 to 9         | 80 plus | Global     | -1        | Health System Access (unitless)                     |
| Diarrheal diseases | Male   | 5 to 9         | 80 plus | Global     | -1        | Improved Water Source (proportion with access)      |
| Diarrheal diseases | Male   | Early Neonatal | 1 to 4  | Global     | -1        | Improved Water Source (proportion with access)      |
| Diarrheal diseases | Male   | 5 to 9         | 80 plus | Global     | -1        | LDI (IS per capita)                                 |
| Diarrheal diseases | Male   | Early Neonatal | 1 to 4  | Global     | -1        | LDI (IS per capita)                                 |
| Diarrheal diseases | Male   | 5 to 9         | 80 plus | Global     | -1        | Rotavirus coverage (proportion)                     |
| Diarrheal diseases | Male   | Early Neonatal | 1 to 4  | Global     | -1        | Rotavirus coverage (proportion)                     |
| Diarrheal diseases | Male   | 5 to 9         | 80 plus | Global     | -1        | Sanitation (proportion with access)                 |
| Diarrheal diseases | Male   | Early Neonatal | 1 to 4  | Global     | -1        | Sanitation (proportion with access)                 |
| Diarrheal diseases | Male   | 5 to 9         | 80 plus | Global     | -1        | Sociodemographic Status                             |
| Diarrheal diseases | Male   | Early Neonatal | 1 to 4  | Global     | -1        | Sociodemographic Status                             |
| Diarrheal diseases | Male   | 5 to 9         | 80 plus | Global     | 0         | Population Density (over 1000 ppl/sqkm, proportion) |
| Diarrheal diseases | Male   | Early Neonatal | 1 to 4  | Global     | 0         | Population Density (over 1000 ppl/sqkm, proportion) |
| Diarrheal diseases | Male   | Early Neonatal | 1 to 4  | Global     | 0         | Population Density (under 150 ppl/sqkm, proportion) |
| Diarrheal diseases | Male   | 5 to 9         | 80 plus | Global     | 0         | SEV unsafe sanitation                               |
| Diarrheal diseases | Male   | 5 to 9         | 80 plus | Global     | 0         | SEV unsafe water                                    |
| Diarrheal diseases | Male   | Early Neonatal | 1 to 4  | Global     | 1         | Latitude Under 15 (proportion)                      |
| Diarrheal diseases | Male   | 5 to 9         | 80 plus | Global     | 1         | Log-transformed SEV scalar: Diarrhea                |
| Diarrheal diseases | Male   | Early Neonatal | 1 to 4  | Global     | 1         | Log-transformed SEV scalar: Diarrhea                |
| Diarrheal diseases | Male   | Early Neonatal | 1 to 4  | Global     | 1         | Malnutrition (proportion <2SD weight for age)       |
| Diarrheal diseases | Male   | Early Neonatal | 1 to 4  | Global     | 1         | SEV unsafe sanitation                               |
| Diarrheal diseases | Male   | Early Neonatal | 1 to 4  | Global     | 1         | SEV unsafe water                                    |
| Diarrheal diseases | Male   | 5 to 9         | 80 plus | Data Rich  | -1        | Education (years per capita)                        |
| Diarrheal diseases | Male   | Early Neonatal | 1 to 4  | Data Rich  | -1        | Education (years per capita)                        |
| Diarrheal diseases | Male   | 5 to 9         | 80 plus | Data Rich  | -1        | Health System Access (unitless)                     |
| Diarrheal diseases | Male   | Early Neonatal | 1 to 4  | Data Rich  | -1        | Improved Water Source (proportion with access)      |
| Diarrheal diseases | Male   | 5 to 9         | 80 plus | Data Rich  | -1        | LDI (IS per capita)                                 |
| Diarrheal diseases | Male   | Early Neonatal | 1 to 4  | Data Rich  | -1        | LDI (IS per capita)                                 |
| Diarrheal diseases | Male   | 5 to 9         | 80 plus | Data Rich  | -1        | Rotavirus coverage (proportion)                     |
| Diarrheal diseases | Male   | Early Neonatal | 1 to 4  | Data Rich  | -1        | Rotavirus coverage (proportion)                     |
| Diarrheal diseases | Male   | Early Neonatal | 1 to 4  | Data Rich  | -1        | Sanitation (proportion with access)                 |
| Diarrheal diseases | Male   | 5 to 9         | 80 plus | Data Rich  | -1        | Sociodemographic Status                             |
| Diarrheal diseases | Male   | Early Neonatal | 1 to 4  | Data Rich  | -1        | Sociodemographic Status                             |
| Diarrheal diseases | Male   | 5 to 9         | 80 plus | Data Rich  | 0         | Log-transformed SEV scalar: Diarrhea                |
| Diarrheal diseases | Male   | 5 to 9         | 80 plus | Data Rich  | 0         | Population Density (over 1000 ppl/sqkm, proportion) |
| Diarrheal diseases | Male   | Early Neonatal | 1 to 4  | Data Rich  | 0         | Population Density (over 1000 ppl/sqkm, proportion) |

**Appendix Table 10: CODEm covariates used, level of covariate, and expected direction of covariate by cause, sex, and age**

| Cause              | Sex    | Age start      | Age end | Model type | Direction | Covariate                                           |
|--------------------|--------|----------------|---------|------------|-----------|-----------------------------------------------------|
| Diarrheal diseases | Male   | Early Neonatal | 1 to 4  | Data Rich  | 0         | Population Density (under 150 ppl/sqkm, proportion) |
| Diarrheal diseases | Male   | 5 to 9         | 80 plus | Data Rich  | 0         | SEV unsafe sanitation                               |
| Diarrheal diseases | Male   | 5 to 9         | 80 plus | Data Rich  | 0         | SEV unsafe water                                    |
| Diarrheal diseases | Male   | 5 to 9         | 80 plus | Data Rich  | 1         | Improved Water Source (proportion with access)      |
| Diarrheal diseases | Male   | Early Neonatal | 1 to 4  | Data Rich  | 1         | Latitude Under 15 (proportion)                      |
| Diarrheal diseases | Male   | Early Neonatal | 1 to 4  | Data Rich  | 1         | Log-transformed SEV scalar: Diarrhea                |
| Diarrheal diseases | Male   | 5 to 9         | 80 plus | Data Rich  | 1         | Malnutrition (proportion <2SD weight for age)       |
| Diarrheal diseases | Male   | Early Neonatal | 1 to 4  | Data Rich  | 1         | Malnutrition (proportion <2SD weight for age)       |
| Diarrheal diseases | Male   | Early Neonatal | 1 to 4  | Data Rich  | 1         | SEV unsafe sanitation                               |
| Diarrheal diseases | Male   | Early Neonatal | 1 to 4  | Data Rich  | 1         | SEV unsafe water                                    |
| Diarrheal diseases | Male   | 5 to 9         | 80 plus | Data Rich  | 1         | Sanitation (proportion with access)                 |
| Diarrheal diseases | Female | 5 to 9         | 80 plus | Global     | -1        | Education (years per capita)                        |
| Diarrheal diseases | Female | Early Neonatal | 1 to 4  | Global     | -1        | Education (years per capita)                        |
| Diarrheal diseases | Female | 5 to 9         | 80 plus | Global     | -1        | Health System Access (unitless)                     |
| Diarrheal diseases | Female | 5 to 9         | 80 plus | Global     | -1        | Improved Water Source (proportion with access)      |
| Diarrheal diseases | Female | Early Neonatal | 1 to 4  | Global     | -1        | Improved Water Source (proportion with access)      |
| Diarrheal diseases | Female | 5 to 9         | 80 plus | Global     | -1        | LDI (IS per capita)                                 |
| Diarrheal diseases | Female | Early Neonatal | 1 to 4  | Global     | -1        | LDI (IS per capita)                                 |
| Diarrheal diseases | Female | 5 to 9         | 80 plus | Global     | -1        | Rotavirus coverage (proportion)                     |
| Diarrheal diseases | Female | Early Neonatal | 1 to 4  | Global     | -1        | Rotavirus coverage (proportion)                     |
| Diarrheal diseases | Female | 5 to 9         | 80 plus | Global     | -1        | Sanitation (proportion with access)                 |
| Diarrheal diseases | Female | Early Neonatal | 1 to 4  | Global     | -1        | Sanitation (proportion with access)                 |
| Diarrheal diseases | Female | 5 to 9         | 80 plus | Global     | -1        | Sociodemographic Status                             |
| Diarrheal diseases | Female | Early Neonatal | 1 to 4  | Global     | -1        | Sociodemographic Status                             |
| Diarrheal diseases | Female | 5 to 9         | 80 plus | Global     | 0         | Population Density (over 1000 ppl/sqkm, proportion) |
| Diarrheal diseases | Female | Early Neonatal | 1 to 4  | Global     | 0         | Population Density (over 1000 ppl/sqkm, proportion) |
| Diarrheal diseases | Female | Early Neonatal | 1 to 4  | Global     | 0         | Population Density (under 150 ppl/sqkm, proportion) |
| Diarrheal diseases | Female | 5 to 9         | 80 plus | Global     | 0         | SEV unsafe sanitation                               |
| Diarrheal diseases | Female | 5 to 9         | 80 plus | Global     | 0         | SEV unsafe water                                    |
| Diarrheal diseases | Female | Early Neonatal | 1 to 4  | Global     | 1         | Latitude Under 15 (proportion)                      |
| Diarrheal diseases | Female | 5 to 9         | 80 plus | Global     | 1         | Log-transformed SEV scalar: Diarrhea                |
| Diarrheal diseases | Female | Early Neonatal | 1 to 4  | Global     | 1         | Log-transformed SEV scalar: Diarrhea                |
| Diarrheal diseases | Female | Early Neonatal | 1 to 4  | Global     | 1         | Malnutrition (proportion <2SD weight for age)       |
| Diarrheal diseases | Female | Early Neonatal | 1 to 4  | Global     | 1         | SEV unsafe sanitation                               |
| Diarrheal diseases | Female | Early Neonatal | 1 to 4  | Global     | 1         | SEV unsafe water                                    |
| Diarrheal diseases | Female | 5 to 9         | 80 plus | Data Rich  | -1        | Education (years per capita)                        |
| Diarrheal diseases | Female | Early Neonatal | 1 to 4  | Data Rich  | -1        | Education (years per capita)                        |
| Diarrheal diseases | Female | 5 to 9         | 80 plus | Data Rich  | -1        | Health System Access (unitless)                     |
| Diarrheal diseases | Female | Early Neonatal | 1 to 4  | Data Rich  | -1        | Improved Water Source (proportion with access)      |
| Diarrheal diseases | Female | 5 to 9         | 80 plus | Data Rich  | -1        | LDI (IS per capita)                                 |
| Diarrheal diseases | Female | Early Neonatal | 1 to 4  | Data Rich  | -1        | LDI (IS per capita)                                 |
| Diarrheal diseases | Female | 5 to 9         | 80 plus | Data Rich  | -1        | Rotavirus coverage (proportion)                     |
| Diarrheal diseases | Female | Early Neonatal | 1 to 4  | Data Rich  | -1        | Rotavirus coverage (proportion)                     |
| Diarrheal diseases | Female | Early Neonatal | 1 to 4  | Data Rich  | -1        | Sanitation (proportion with access)                 |

**Appendix Table 10: CODEm covariates used, level of covariate, and expected direction of covariate by cause, sex, and age**

| Cause                                | Sex    | Age start      | Age end | Model type | Direction | Covariate                                           |
|--------------------------------------|--------|----------------|---------|------------|-----------|-----------------------------------------------------|
| Diarrheal diseases                   | Female | 5 to 9         | 80 plus | Data Rich  | -1        | Sociodemographic Status                             |
| Diarrheal diseases                   | Female | Early Neonatal | 1 to 4  | Data Rich  | -1        | Sociodemographic Status                             |
| Diarrheal diseases                   | Female | 5 to 9         | 80 plus | Data Rich  | 0         | Log-transformed SEV scalar: Diarrhea                |
| Diarrheal diseases                   | Female | 5 to 9         | 80 plus | Data Rich  | 0         | Population Density (over 1000 ppl/sqkm, proportion) |
| Diarrheal diseases                   | Female | Early Neonatal | 1 to 4  | Data Rich  | 0         | Population Density (over 1000 ppl/sqkm, proportion) |
| Diarrheal diseases                   | Female | Early Neonatal | 1 to 4  | Data Rich  | 0         | Population Density (under 150 ppl/sqkm, proportion) |
| Diarrheal diseases                   | Female | 5 to 9         | 80 plus | Data Rich  | 0         | SEV unsafe sanitation                               |
| Diarrheal diseases                   | Female | 5 to 9         | 80 plus | Data Rich  | 0         | SEV unsafe water                                    |
| Diarrheal diseases                   | Female | 5 to 9         | 80 plus | Data Rich  | 1         | Improved Water Source (proportion with access)      |
| Diarrheal diseases                   | Female | Early Neonatal | 1 to 4  | Data Rich  | 1         | Latitude Under 15 (proportion)                      |
| Diarrheal diseases                   | Female | Early Neonatal | 1 to 4  | Data Rich  | 1         | Log-transformed SEV scalar: Diarrhea                |
| Diarrheal diseases                   | Female | 5 to 9         | 80 plus | Data Rich  | 1         | Malnutrition (proportion <2SD weight for age)       |
| Diarrheal diseases                   | Female | Early Neonatal | 1 to 4  | Data Rich  | 1         | Malnutrition (proportion <2SD weight for age)       |
| Diarrheal diseases                   | Female | Early Neonatal | 1 to 4  | Data Rich  | 1         | SEV unsafe sanitation                               |
| Diarrheal diseases                   | Female | Early Neonatal | 1 to 4  | Data Rich  | 1         | SEV unsafe water                                    |
| Diarrheal diseases                   | Female | 5 to 9         | 80 plus | Data Rich  | 1         | Sanitation (proportion with access)                 |
| Other intestinal infectious diseases | Male   | Post Neonatal  | 80 plus | Global     | -1        | Education (years per capita)                        |
| Other intestinal infectious diseases | Male   | Post Neonatal  | 80 plus | Global     | -1        | Health System Access (capped)                       |
| Other intestinal infectious diseases | Male   | Post Neonatal  | 80 plus | Global     | -1        | Improved Water Source (proportion with access)      |
| Other intestinal infectious diseases | Male   | Post Neonatal  | 80 plus | Global     | -1        | LDI (IS per capita)                                 |
| Other intestinal infectious diseases | Male   | Post Neonatal  | 80 plus | Global     | -1        | Sanitation (proportion with access)                 |
| Other intestinal infectious diseases | Male   | Post Neonatal  | 80 plus | Global     | -1        | Sociodemographic Status                             |
| Other intestinal infectious diseases | Male   | Post Neonatal  | 80 plus | Data Rich  | -1        | Education (years per capita)                        |
| Other intestinal infectious diseases | Male   | Post Neonatal  | 80 plus | Data Rich  | -1        | Health System Access (capped)                       |
| Other intestinal infectious diseases | Male   | Post Neonatal  | 80 plus | Data Rich  | -1        | Improved Water Source (proportion with access)      |
| Other intestinal infectious diseases | Male   | Post Neonatal  | 80 plus | Data Rich  | -1        | LDI (IS per capita)                                 |
| Other intestinal infectious diseases | Male   | Post Neonatal  | 80 plus | Data Rich  | -1        | Sanitation (proportion with access)                 |
| Other intestinal infectious diseases | Male   | Post Neonatal  | 80 plus | Data Rich  | -1        | Sociodemographic Status                             |
| Other intestinal infectious diseases | Female | Post Neonatal  | 80 plus | Global     | -1        | Education (years per capita)                        |
| Other intestinal infectious diseases | Female | Post Neonatal  | 80 plus | Global     | -1        | Health System Access (capped)                       |
| Other intestinal infectious diseases | Female | Post Neonatal  | 80 plus | Global     | -1        | Improved Water Source (proportion with access)      |
| Other intestinal infectious diseases | Female | Post Neonatal  | 80 plus | Global     | -1        | LDI (IS per capita)                                 |
| Other intestinal infectious diseases | Female | Post Neonatal  | 80 plus | Global     | -1        | Sanitation (proportion with access)                 |
| Other intestinal infectious diseases | Female | Post Neonatal  | 80 plus | Global     | -1        | Sociodemographic Status                             |
| Other intestinal infectious diseases | Female | Post Neonatal  | 80 plus | Data Rich  | -1        | Education (years per capita)                        |
| Other intestinal infectious diseases | Female | Post Neonatal  | 80 plus | Data Rich  | -1        | Health System Access (capped)                       |
| Other intestinal infectious diseases | Female | Post Neonatal  | 80 plus | Data Rich  | -1        | Improved Water Source (proportion with access)      |
| Other intestinal infectious diseases | Female | Post Neonatal  | 80 plus | Data Rich  | -1        | LDI (IS per capita)                                 |
| Other intestinal infectious diseases | Female | Post Neonatal  | 80 plus | Data Rich  | -1        | Sanitation (proportion with access)                 |
| Other intestinal infectious diseases | Female | Post Neonatal  | 80 plus | Data Rich  | -1        | Sociodemographic Status                             |
| Lower respiratory infections         | Male   | 5 to 9         | 80 plus | Global     | -1        | DTP3 Coverage (proportion)                          |
| Lower respiratory infections         | Male   | Early Neonatal | 1 to 4  | Global     | -1        | DTP3 Coverage (proportion)                          |
| Lower respiratory infections         | Male   | 5 to 9         | 80 plus | Global     | -1        | Education (years per capita)                        |
| Lower respiratory infections         | Male   | Early Neonatal | 1 to 4  | Global     | -1        | Education (years per capita)                        |

**Appendix Table 10: CODEm covariates used, level of covariate, and expected direction of covariate by cause, sex, and age**

| Cause                        | Sex  | Age start      | Age end | Model type | Direction | Covariate                                     |
|------------------------------|------|----------------|---------|------------|-----------|-----------------------------------------------|
| Lower respiratory infections | Male | 5 to 9         | 80 plus | Global     | -1        | Health System Access 2 (unitless)             |
| Lower respiratory infections | Male | Early Neonatal | 1 to 4  | Global     | -1        | Health System Access 2 (unitless)             |
| Lower respiratory infections | Male | Early Neonatal | 1 to 4  | Global     | -1        | Hib3 Vaccine Coverage (proportion)            |
| Lower respiratory infections | Male | 5 to 9         | 80 plus | Global     | -1        | LDI (IS per capita)                           |
| Lower respiratory infections | Male | Early Neonatal | 1 to 4  | Global     | -1        | LDI (IS per capita)                           |
| Lower respiratory infections | Male | 5 to 9         | 80 plus | Global     | -1        | Malnutrition (proportion <2SD weight for age) |
| Lower respiratory infections | Male | Early Neonatal | 1 to 4  | Global     | -1        | Malnutrition (proportion <2SD weight for age) |
| Lower respiratory infections | Male | 5 to 9         | 80 plus | Global     | -1        | PCV3 Coverage (proportion)                    |
| Lower respiratory infections | Male | Early Neonatal | 1 to 4  | Global     | -1        | PCV3 Coverage (proportion)                    |
| Lower respiratory infections | Male | 5 to 9         | 80 plus | Global     | -1        | Sociodemographic Status                       |
| Lower respiratory infections | Male | Early Neonatal | 1 to 4  | Global     | -1        | Sociodemographic Status                       |
| Lower respiratory infections | Male | 5 to 9         | 80 plus | Global     | 0         | SEV unsafe sanitation                         |
| Lower respiratory infections | Male | Early Neonatal | 1 to 4  | Global     | 0         | SEV unsafe sanitation                         |
| Lower respiratory infections | Male | 5 to 9         | 80 plus | Global     | 1         | Indoor Air Pollution (All Cooking Fuels)      |
| Lower respiratory infections | Male | Early Neonatal | 1 to 4  | Global     | 1         | Indoor Air Pollution (All Cooking Fuels)      |
| Lower respiratory infections | Male | 5 to 9         | 80 plus | Global     | 1         | Log-transformed SEV scalar: LRI               |
| Lower respiratory infections | Male | Early Neonatal | 1 to 4  | Global     | 1         | Log-transformed SEV scalar: LRI               |
| Lower respiratory infections | Male | 5 to 9         | 80 plus | Global     | 1         | Outdoor Air Pollution (PM2.5)                 |
| Lower respiratory infections | Male | Early Neonatal | 1 to 4  | Global     | 1         | Outdoor Air Pollution (PM2.5)                 |
| Lower respiratory infections | Male | 5 to 9         | 80 plus | Global     | 1         | Smoking Prevalence                            |
| Lower respiratory infections | Male | Early Neonatal | 1 to 4  | Global     | 1         | Smoking Prevalence                            |
| Lower respiratory infections | Male | 5 to 9         | 80 plus | Data Rich  | -1        | DTP3 Coverage (proportion)                    |
| Lower respiratory infections | Male | Early Neonatal | 1 to 4  | Data Rich  | -1        | DTP3 Coverage (proportion)                    |
| Lower respiratory infections | Male | 5 to 9         | 80 plus | Data Rich  | -1        | Education (years per capita)                  |
| Lower respiratory infections | Male | Early Neonatal | 1 to 4  | Data Rich  | -1        | Education (years per capita)                  |
| Lower respiratory infections | Male | 5 to 9         | 80 plus | Data Rich  | -1        | Health System Access 2 (unitless)             |
| Lower respiratory infections | Male | Early Neonatal | 1 to 4  | Data Rich  | -1        | Health System Access 2 (unitless)             |
| Lower respiratory infections | Male | Early Neonatal | 1 to 4  | Data Rich  | -1        | Hib3 Vaccine Coverage (proportion)            |
| Lower respiratory infections | Male | 5 to 9         | 80 plus | Data Rich  | -1        | LDI (IS per capita)                           |
| Lower respiratory infections | Male | Early Neonatal | 1 to 4  | Data Rich  | -1        | LDI (IS per capita)                           |
| Lower respiratory infections | Male | 5 to 9         | 80 plus | Data Rich  | -1        | Malnutrition (proportion <2SD weight for age) |
| Lower respiratory infections | Male | Early Neonatal | 1 to 4  | Data Rich  | -1        | Malnutrition (proportion <2SD weight for age) |
| Lower respiratory infections | Male | 5 to 9         | 80 plus | Data Rich  | -1        | PCV3 Coverage (proportion)                    |
| Lower respiratory infections | Male | Early Neonatal | 1 to 4  | Data Rich  | -1        | PCV3 Coverage (proportion)                    |
| Lower respiratory infections | Male | 5 to 9         | 80 plus | Data Rich  | -1        | Sociodemographic Status                       |
| Lower respiratory infections | Male | Early Neonatal | 1 to 4  | Data Rich  | -1        | Sociodemographic Status                       |
| Lower respiratory infections | Male | 5 to 9         | 80 plus | Data Rich  | 0         | SEV unsafe sanitation                         |
| Lower respiratory infections | Male | Early Neonatal | 1 to 4  | Data Rich  | 0         | SEV unsafe sanitation                         |
| Lower respiratory infections | Male | 5 to 9         | 80 plus | Data Rich  | 1         | Indoor Air Pollution (All Cooking Fuels)      |
| Lower respiratory infections | Male | Early Neonatal | 1 to 4  | Data Rich  | 1         | Indoor Air Pollution (All Cooking Fuels)      |
| Lower respiratory infections | Male | 5 to 9         | 80 plus | Data Rich  | 1         | Log-transformed SEV scalar: LRI               |
| Lower respiratory infections | Male | Early Neonatal | 1 to 4  | Data Rich  | 1         | Log-transformed SEV scalar: LRI               |
| Lower respiratory infections | Male | 5 to 9         | 80 plus | Data Rich  | 1         | Outdoor Air Pollution (PM2.5)                 |
| Lower respiratory infections | Male | Early Neonatal | 1 to 4  | Data Rich  | 1         | Outdoor Air Pollution (PM2.5)                 |

**Appendix Table 10: CODEm covariates used, level of covariate, and expected direction of covariate by cause, sex, and age**

| Cause                        | Sex    | Age start      | Age end | Model type | Direction | Covariate                                     |
|------------------------------|--------|----------------|---------|------------|-----------|-----------------------------------------------|
| Lower respiratory infections | Male   | 5 to 9         | 80 plus | Data Rich  | 1         | Smoking Prevalence                            |
| Lower respiratory infections | Male   | Early Neonatal | 1 to 4  | Data Rich  | 1         | Smoking Prevalence                            |
| Lower respiratory infections | Female | 5 to 9         | 80 plus | Global     | -1        | DTP3 Coverage (proportion)                    |
| Lower respiratory infections | Female | Early Neonatal | 1 to 4  | Global     | -1        | DTP3 Coverage (proportion)                    |
| Lower respiratory infections | Female | 5 to 9         | 80 plus | Global     | -1        | Education (years per capita)                  |
| Lower respiratory infections | Female | Early Neonatal | 1 to 4  | Global     | -1        | Education (years per capita)                  |
| Lower respiratory infections | Female | 5 to 9         | 80 plus | Global     | -1        | Health System Access 2 (unitless)             |
| Lower respiratory infections | Female | Early Neonatal | 1 to 4  | Global     | -1        | Health System Access 2 (unitless)             |
| Lower respiratory infections | Female | Early Neonatal | 1 to 4  | Global     | -1        | Hib3 Vaccine Coverage (proportion)            |
| Lower respiratory infections | Female | 5 to 9         | 80 plus | Global     | -1        | LDI (IS per capita)                           |
| Lower respiratory infections | Female | Early Neonatal | 1 to 4  | Global     | -1        | LDI (IS per capita)                           |
| Lower respiratory infections | Female | 5 to 9         | 80 plus | Global     | -1        | Malnutrition (proportion <2SD weight for age) |
| Lower respiratory infections | Female | Early Neonatal | 1 to 4  | Global     | -1        | Malnutrition (proportion <2SD weight for age) |
| Lower respiratory infections | Female | 5 to 9         | 80 plus | Global     | -1        | PCV3 Coverage (proportion)                    |
| Lower respiratory infections | Female | Early Neonatal | 1 to 4  | Global     | -1        | PCV3 Coverage (proportion)                    |
| Lower respiratory infections | Female | 5 to 9         | 80 plus | Global     | -1        | Sociodemographic Status                       |
| Lower respiratory infections | Female | Early Neonatal | 1 to 4  | Global     | -1        | Sociodemographic Status                       |
| Lower respiratory infections | Female | 5 to 9         | 80 plus | Global     | 0         | SEV unsafe sanitation                         |
| Lower respiratory infections | Female | Early Neonatal | 1 to 4  | Global     | 0         | SEV unsafe sanitation                         |
| Lower respiratory infections | Female | 5 to 9         | 80 plus | Global     | 1         | Indoor Air Pollution (All Cooking Fuels)      |
| Lower respiratory infections | Female | Early Neonatal | 1 to 4  | Global     | 1         | Indoor Air Pollution (All Cooking Fuels)      |
| Lower respiratory infections | Female | 5 to 9         | 80 plus | Global     | 1         | Log-transformed SEV scalar: LRI               |
| Lower respiratory infections | Female | Early Neonatal | 1 to 4  | Global     | 1         | Log-transformed SEV scalar: LRI               |
| Lower respiratory infections | Female | 5 to 9         | 80 plus | Global     | 1         | Outdoor Air Pollution (PM2.5)                 |
| Lower respiratory infections | Female | Early Neonatal | 1 to 4  | Global     | 1         | Outdoor Air Pollution (PM2.5)                 |
| Lower respiratory infections | Female | 5 to 9         | 80 plus | Global     | 1         | Smoking Prevalence                            |
| Lower respiratory infections | Female | Early Neonatal | 1 to 4  | Global     | 1         | Smoking Prevalence                            |
| Lower respiratory infections | Female | 5 to 9         | 80 plus | Data Rich  | -1        | DTP3 Coverage (proportion)                    |
| Lower respiratory infections | Female | Early Neonatal | 1 to 4  | Data Rich  | -1        | DTP3 Coverage (proportion)                    |
| Lower respiratory infections | Female | 5 to 9         | 80 plus | Data Rich  | -1        | Education (years per capita)                  |
| Lower respiratory infections | Female | Early Neonatal | 1 to 4  | Data Rich  | -1        | Education (years per capita)                  |
| Lower respiratory infections | Female | 5 to 9         | 80 plus | Data Rich  | -1        | Health System Access 2 (unitless)             |
| Lower respiratory infections | Female | Early Neonatal | 1 to 4  | Data Rich  | -1        | Health System Access 2 (unitless)             |
| Lower respiratory infections | Female | Early Neonatal | 1 to 4  | Data Rich  | -1        | Hib3 Vaccine Coverage (proportion)            |
| Lower respiratory infections | Female | 5 to 9         | 80 plus | Data Rich  | -1        | LDI (IS per capita)                           |
| Lower respiratory infections | Female | Early Neonatal | 1 to 4  | Data Rich  | -1        | LDI (IS per capita)                           |
| Lower respiratory infections | Female | 5 to 9         | 80 plus | Data Rich  | -1        | Malnutrition (proportion <2SD weight for age) |
| Lower respiratory infections | Female | Early Neonatal | 1 to 4  | Data Rich  | -1        | Malnutrition (proportion <2SD weight for age) |
| Lower respiratory infections | Female | 5 to 9         | 80 plus | Data Rich  | -1        | PCV3 Coverage (proportion)                    |
| Lower respiratory infections | Female | Early Neonatal | 1 to 4  | Data Rich  | -1        | PCV3 Coverage (proportion)                    |
| Lower respiratory infections | Female | 5 to 9         | 80 plus | Data Rich  | -1        | Sociodemographic Status                       |
| Lower respiratory infections | Female | Early Neonatal | 1 to 4  | Data Rich  | -1        | Sociodemographic Status                       |
| Lower respiratory infections | Female | 5 to 9         | 80 plus | Data Rich  | 0         | SEV unsafe sanitation                         |
| Lower respiratory infections | Female | Early Neonatal | 1 to 4  | Data Rich  | 0         | SEV unsafe sanitation                         |

**Appendix Table 10: CODEm covariates used, level of covariate, and expected direction of covariate by cause, sex, and age**

| Cause                        | Sex    | Age start      | Age end | Model type | Direction | Covariate                                           |
|------------------------------|--------|----------------|---------|------------|-----------|-----------------------------------------------------|
| Lower respiratory infections | Female | 5 to 9         | 80 plus | Data Rich  | 1         | Indoor Air Pollution (All Cooking Fuels)            |
| Lower respiratory infections | Female | Early Neonatal | 1 to 4  | Data Rich  | 1         | Indoor Air Pollution (All Cooking Fuels)            |
| Lower respiratory infections | Female | 5 to 9         | 80 plus | Data Rich  | 1         | Log-transformed SEV scalar: LRI                     |
| Lower respiratory infections | Female | Early Neonatal | 1 to 4  | Data Rich  | 1         | Log-transformed SEV scalar: LRI                     |
| Lower respiratory infections | Female | 5 to 9         | 80 plus | Data Rich  | 1         | Outdoor Air Pollution (PM2.5)                       |
| Lower respiratory infections | Female | Early Neonatal | 1 to 4  | Data Rich  | 1         | Outdoor Air Pollution (PM2.5)                       |
| Lower respiratory infections | Female | 5 to 9         | 80 plus | Data Rich  | 1         | Smoking Prevalence                                  |
| Lower respiratory infections | Female | Early Neonatal | 1 to 4  | Data Rich  | 1         | Smoking Prevalence                                  |
| Otitis media                 | Male   | Early Neonatal | 80 plus | Global     | -1        | DTP3 Coverage (proportion)                          |
| Otitis media                 | Male   | Early Neonatal | 80 plus | Global     | -1        | Education (years per capita)                        |
| Otitis media                 | Male   | Early Neonatal | 80 plus | Global     | -1        | Health System Access 2 (unitless)                   |
| Otitis media                 | Male   | Early Neonatal | 80 plus | Global     | -1        | Improved Water Source (proportion with access)      |
| Otitis media                 | Male   | Early Neonatal | 80 plus | Global     | -1        | LDI (IS per capita)                                 |
| Otitis media                 | Male   | Early Neonatal | 80 plus | Global     | -1        | Sanitation (proportion with access)                 |
| Otitis media                 | Male   | Early Neonatal | 80 plus | Global     | 1         | Elevation Over 1500m (proportion)                   |
| Otitis media                 | Male   | Early Neonatal | 80 plus | Global     | 1         | Indoor Air Pollution (All Cooking Fuels)            |
| Otitis media                 | Male   | Early Neonatal | 80 plus | Global     | 1         | Log-transformed SEV scalar: Otitis                  |
| Otitis media                 | Male   | Early Neonatal | 80 plus | Global     | 1         | Malnutrition (proportion <2SD weight for age)       |
| Otitis media                 | Male   | Early Neonatal | 80 plus | Global     | 1         | Outdoor Air Pollution (PM2.5)                       |
| Otitis media                 | Male   | Early Neonatal | 80 plus | Global     | 1         | Population Density (over 1000 ppl/sqkm, proportion) |
| Otitis media                 | Male   | Early Neonatal | 80 plus | Global     | 1         | Rainfall (Quintiles 4-5)                            |
| Otitis media                 | Male   | Early Neonatal | 80 plus | Global     | 1         | Smoking Prevalence                                  |
| Otitis media                 | Male   | Early Neonatal | 80 plus | Data Rich  | -1        | DTP3 Coverage (proportion)                          |
| Otitis media                 | Male   | Early Neonatal | 80 plus | Data Rich  | -1        | Education (years per capita)                        |
| Otitis media                 | Male   | Early Neonatal | 80 plus | Data Rich  | -1        | Health System Access 2 (unitless)                   |
| Otitis media                 | Male   | Early Neonatal | 80 plus | Data Rich  | -1        | Improved Water Source (proportion with access)      |
| Otitis media                 | Male   | Early Neonatal | 80 plus | Data Rich  | -1        | LDI (IS per capita)                                 |
| Otitis media                 | Male   | Early Neonatal | 80 plus | Data Rich  | -1        | Sanitation (proportion with access)                 |
| Otitis media                 | Male   | Early Neonatal | 80 plus | Data Rich  | -1        | Sociodemographic Status                             |
| Otitis media                 | Male   | Early Neonatal | 80 plus | Data Rich  | 1         | Elevation Over 1500m (proportion)                   |
| Otitis media                 | Male   | Early Neonatal | 80 plus | Data Rich  | 1         | Indoor Air Pollution (All Cooking Fuels)            |
| Otitis media                 | Male   | Early Neonatal | 80 plus | Data Rich  | 1         | Log-transformed SEV scalar: Otitis                  |
| Otitis media                 | Male   | Early Neonatal | 80 plus | Data Rich  | 1         | Malnutrition (proportion <2SD weight for age)       |
| Otitis media                 | Male   | Early Neonatal | 80 plus | Data Rich  | 1         | Outdoor Air Pollution (PM2.5)                       |
| Otitis media                 | Male   | Early Neonatal | 80 plus | Data Rich  | 1         | Population Density (over 1000 ppl/sqkm, proportion) |
| Otitis media                 | Male   | Early Neonatal | 80 plus | Data Rich  | 1         | Rainfall (Quintiles 4-5)                            |
| Otitis media                 | Male   | Early Neonatal | 80 plus | Data Rich  | 1         | Smoking Prevalence                                  |
| Otitis media                 | Female | Early Neonatal | 80 plus | Global     | -1        | DTP3 Coverage (proportion)                          |
| Otitis media                 | Female | Early Neonatal | 80 plus | Global     | -1        | Education (years per capita)                        |
| Otitis media                 | Female | Early Neonatal | 80 plus | Global     | -1        | Health System Access 2 (unitless)                   |
| Otitis media                 | Female | Early Neonatal | 80 plus | Global     | -1        | Improved Water Source (proportion with access)      |
| Otitis media                 | Female | Early Neonatal | 80 plus | Global     | -1        | LDI (IS per capita)                                 |
| Otitis media                 | Female | Early Neonatal | 80 plus | Global     | -1        | Sanitation (proportion with access)                 |
| Otitis media                 | Female | Early Neonatal | 80 plus | Global     | 1         | Elevation Over 1500m (proportion)                   |

**Appendix Table 10: CODEm covariates used, level of covariate, and expected direction of covariate by cause, sex, and age**

| Cause        | Sex    | Age start      | Age end | Model type | Direction | Covariate                                                                                                 |
|--------------|--------|----------------|---------|------------|-----------|-----------------------------------------------------------------------------------------------------------|
| Otitis media | Female | Early Neonatal | 80 plus | Global     | 1         | Indoor Air Pollution (All Cooking Fuels)                                                                  |
| Otitis media | Female | Early Neonatal | 80 plus | Global     | 1         | Log-transformed SEV scalar: Otitis                                                                        |
| Otitis media | Female | Early Neonatal | 80 plus | Global     | 1         | Malnutrition (proportion <2SD weight for age)                                                             |
| Otitis media | Female | Early Neonatal | 80 plus | Global     | 1         | Outdoor Air Pollution (PM2.5)                                                                             |
| Otitis media | Female | Early Neonatal | 80 plus | Global     | 1         | Population Density (over 1000 ppl/sqkm, proportion)                                                       |
| Otitis media | Female | Early Neonatal | 80 plus | Global     | 1         | Rainfall (Quintiles 4-5)                                                                                  |
| Otitis media | Female | Early Neonatal | 80 plus | Global     | 1         | Smoking Prevalence                                                                                        |
| Otitis media | Female | Early Neonatal | 80 plus | Data Rich  | -1        | DTP3 Coverage (proportion)                                                                                |
| Otitis media | Female | Early Neonatal | 80 plus | Data Rich  | -1        | Education (years per capita)                                                                              |
| Otitis media | Female | Early Neonatal | 80 plus | Data Rich  | -1        | Health System Access 2 (unitless)                                                                         |
| Otitis media | Female | Early Neonatal | 80 plus | Data Rich  | -1        | Improved Water Source (proportion with access)                                                            |
| Otitis media | Female | Early Neonatal | 80 plus | Data Rich  | -1        | LDI (IS per capita)                                                                                       |
| Otitis media | Female | Early Neonatal | 80 plus | Data Rich  | -1        | Sanitation (proportion with access)                                                                       |
| Otitis media | Female | Early Neonatal | 80 plus | Data Rich  | -1        | Sociodemographic Status                                                                                   |
| Otitis media | Female | Early Neonatal | 80 plus | Data Rich  | 1         | Elevation Over 1500m (proportion)                                                                         |
| Otitis media | Female | Early Neonatal | 80 plus | Data Rich  | 1         | Indoor Air Pollution (All Cooking Fuels)                                                                  |
| Otitis media | Female | Early Neonatal | 80 plus | Data Rich  | 1         | Log-transformed SEV scalar: Otitis                                                                        |
| Otitis media | Female | Early Neonatal | 80 plus | Data Rich  | 1         | Malnutrition (proportion <2SD weight for age)                                                             |
| Otitis media | Female | Early Neonatal | 80 plus | Data Rich  | 1         | Outdoor Air Pollution (PM2.5)                                                                             |
| Otitis media | Female | Early Neonatal | 80 plus | Data Rich  | 1         | Population Density (over 1000 ppl/sqkm, proportion)                                                       |
| Otitis media | Female | Early Neonatal | 80 plus | Data Rich  | 1         | Rainfall (Quintiles 4-5)                                                                                  |
| Otitis media | Female | Early Neonatal | 80 plus | Data Rich  | 1         | Smoking Prevalence                                                                                        |
| Meningitis   | Male   | 5 to 9         | 80 plus | Global     | -1        | DTP3 Coverage (proportion)                                                                                |
| Meningitis   | Male   | Early Neonatal | 1 to 4  | Global     | -1        | DTP3 Coverage (proportion)                                                                                |
| Meningitis   | Male   | 5 to 9         | 80 plus | Global     | -1        | Health System Access 2 (unitless)                                                                         |
| Meningitis   | Male   | Early Neonatal | 1 to 4  | Global     | -1        | Health System Access 2 (unitless)                                                                         |
| Meningitis   | Male   | 5 to 9         | 80 plus | Global     | -1        | Improved Water Source (proportion with access)                                                            |
| Meningitis   | Male   | Early Neonatal | 1 to 4  | Global     | -1        | Improved Water Source (proportion with access)                                                            |
| Meningitis   | Male   | 5 to 9         | 80 plus | Global     | -1        | LDI (IS per capita)                                                                                       |
| Meningitis   | Male   | Early Neonatal | 1 to 4  | Global     | -1        | LDI (IS per capita)                                                                                       |
| Meningitis   | Male   | 5 to 9         | 80 plus | Global     | -1        | Maternal education (years per capita)                                                                     |
| Meningitis   | Male   | Early Neonatal | 1 to 4  | Global     | -1        | Maternal education (years per capita)                                                                     |
| Meningitis   | Male   | 5 to 9         | 80 plus | Global     | -1        | Proportion of total population covered by menafrivac initiative (meningitis meningococcal type A vaccine) |
| Meningitis   | Male   | Early Neonatal | 1 to 4  | Global     | -1        | Proportion of total population covered by menafrivac initiative (meningitis meningococcal type A vaccine) |
| Meningitis   | Male   | 5 to 9         | 80 plus | Global     | -1        | Sanitation (proportion with access)                                                                       |
| Meningitis   | Male   | Early Neonatal | 1 to 4  | Global     | -1        | Sanitation (proportion with access)                                                                       |
| Meningitis   | Male   | 5 to 9         | 80 plus | Global     | -1        | Sociodemographic Status                                                                                   |
| Meningitis   | Male   | Early Neonatal | 1 to 4  | Global     | -1        | Sociodemographic Status                                                                                   |
| Meningitis   | Male   | 5 to 9         | 80 plus | Global     | 1         | Malnutrition (proportion <2SD weight for age)                                                             |
| Meningitis   | Male   | Early Neonatal | 1 to 4  | Global     | 1         | Malnutrition (proportion <2SD weight for age)                                                             |
| Meningitis   | Male   | 5 to 9         | 80 plus | Global     | 1         | meningitis belt (proportion)                                                                              |
| Meningitis   | Male   | Early Neonatal | 1 to 4  | Global     | 1         | meningitis belt (proportion)                                                                              |
| Meningitis   | Male   | 5 to 9         | 80 plus | Data Rich  | -1        | DTP3 Coverage (proportion)                                                                                |
| Meningitis   | Male   | Early Neonatal | 1 to 4  | Data Rich  | -1        | DTP3 Coverage (proportion)                                                                                |

**Appendix Table 10: CODEm covariates used, level of covariate, and expected direction of covariate by cause, sex, and age**

| Cause      | Sex    | Age start      | Age end | Model type | Direction | Covariate                                                                                                 |
|------------|--------|----------------|---------|------------|-----------|-----------------------------------------------------------------------------------------------------------|
| Meningitis | Male   | 5 to 9         | 80 plus | Data Rich  | -1        | Health System Access 2 (unitless)                                                                         |
| Meningitis | Male   | Early Neonatal | 1 to 4  | Data Rich  | -1        | Health System Access 2 (unitless)                                                                         |
| Meningitis | Male   | 5 to 9         | 80 plus | Data Rich  | -1        | Improved Water Source (proportion with access)                                                            |
| Meningitis | Male   | Early Neonatal | 1 to 4  | Data Rich  | -1        | Improved Water Source (proportion with access)                                                            |
| Meningitis | Male   | 5 to 9         | 80 plus | Data Rich  | -1        | LDI (IS per capita)                                                                                       |
| Meningitis | Male   | Early Neonatal | 1 to 4  | Data Rich  | -1        | LDI (IS per capita)                                                                                       |
| Meningitis | Male   | 5 to 9         | 80 plus | Data Rich  | -1        | Maternal education (years per capita)                                                                     |
| Meningitis | Male   | Early Neonatal | 1 to 4  | Data Rich  | -1        | Maternal education (years per capita)                                                                     |
| Meningitis | Male   | 5 to 9         | 80 plus | Data Rich  | -1        | Proportion of total population covered by menafrivac initiative (meningitis meningococcal type A vaccine) |
| Meningitis | Male   | Early Neonatal | 1 to 4  | Data Rich  | -1        | Proportion of total population covered by menafrivac initiative (meningitis meningococcal type A vaccine) |
| Meningitis | Male   | 5 to 9         | 80 plus | Data Rich  | -1        | Sanitation (proportion with access)                                                                       |
| Meningitis | Male   | Early Neonatal | 1 to 4  | Data Rich  | -1        | Sanitation (proportion with access)                                                                       |
| Meningitis | Male   | 5 to 9         | 80 plus | Data Rich  | -1        | Sociodemographic Status                                                                                   |
| Meningitis | Male   | Early Neonatal | 1 to 4  | Data Rich  | -1        | Sociodemographic Status                                                                                   |
| Meningitis | Male   | 5 to 9         | 80 plus | Data Rich  | 1         | Malnutrition (proportion <2SD weight for age)                                                             |
| Meningitis | Male   | Early Neonatal | 1 to 4  | Data Rich  | 1         | Malnutrition (proportion <2SD weight for age)                                                             |
| Meningitis | Male   | 5 to 9         | 80 plus | Data Rich  | 1         | meningitis belt (proportion)                                                                              |
| Meningitis | Male   | Early Neonatal | 1 to 4  | Data Rich  | 1         | meningitis belt (proportion)                                                                              |
| Meningitis | Female | 5 to 9         | 80 plus | Global     | -1        | DTP3 Coverage (proportion)                                                                                |
| Meningitis | Female | Early Neonatal | 1 to 4  | Global     | -1        | DTP3 Coverage (proportion)                                                                                |
| Meningitis | Female | 5 to 9         | 80 plus | Global     | -1        | Health System Access 2 (unitless)                                                                         |
| Meningitis | Female | Early Neonatal | 1 to 4  | Global     | -1        | Health System Access 2 (unitless)                                                                         |
| Meningitis | Female | 5 to 9         | 80 plus | Global     | -1        | Improved Water Source (proportion with access)                                                            |
| Meningitis | Female | Early Neonatal | 1 to 4  | Global     | -1        | Improved Water Source (proportion with access)                                                            |
| Meningitis | Female | 5 to 9         | 80 plus | Global     | -1        | LDI (IS per capita)                                                                                       |
| Meningitis | Female | Early Neonatal | 1 to 4  | Global     | -1        | LDI (IS per capita)                                                                                       |
| Meningitis | Female | 5 to 9         | 80 plus | Global     | -1        | Maternal education (years per capita)                                                                     |
| Meningitis | Female | Early Neonatal | 1 to 4  | Global     | -1        | Maternal education (years per capita)                                                                     |
| Meningitis | Female | 5 to 9         | 80 plus | Global     | -1        | Proportion of total population covered by menafrivac initiative (meningitis meningococcal type A vaccine) |
| Meningitis | Female | Early Neonatal | 1 to 4  | Global     | -1        | Proportion of total population covered by menafrivac initiative (meningitis meningococcal type A vaccine) |
| Meningitis | Female | 5 to 9         | 80 plus | Global     | -1        | Sanitation (proportion with access)                                                                       |
| Meningitis | Female | Early Neonatal | 1 to 4  | Global     | -1        | Sanitation (proportion with access)                                                                       |
| Meningitis | Female | 5 to 9         | 80 plus | Global     | -1        | Sociodemographic Status                                                                                   |
| Meningitis | Female | Early Neonatal | 1 to 4  | Global     | -1        | Sociodemographic Status                                                                                   |
| Meningitis | Female | 5 to 9         | 80 plus | Global     | 1         | Malnutrition (proportion <2SD weight for age)                                                             |
| Meningitis | Female | Early Neonatal | 1 to 4  | Global     | 1         | Malnutrition (proportion <2SD weight for age)                                                             |
| Meningitis | Female | 5 to 9         | 80 plus | Global     | 1         | meningitis belt (proportion)                                                                              |
| Meningitis | Female | Early Neonatal | 1 to 4  | Global     | 1         | meningitis belt (proportion)                                                                              |
| Meningitis | Female | 5 to 9         | 80 plus | Data Rich  | -1        | DTP3 Coverage (proportion)                                                                                |
| Meningitis | Female | Early Neonatal | 1 to 4  | Data Rich  | -1        | DTP3 Coverage (proportion)                                                                                |
| Meningitis | Female | 5 to 9         | 80 plus | Data Rich  | -1        | Health System Access 2 (unitless)                                                                         |
| Meningitis | Female | Early Neonatal | 1 to 4  | Data Rich  | -1        | Health System Access 2 (unitless)                                                                         |
| Meningitis | Female | 5 to 9         | 80 plus | Data Rich  | -1        | Improved Water Source (proportion with access)                                                            |
| Meningitis | Female | Early Neonatal | 1 to 4  | Data Rich  | -1        | Improved Water Source (proportion with access)                                                            |



**Appendix Table 10: CODEm covariates used, level of covariate, and expected direction of covariate by cause, sex, and age**

| Cause        | Sex    | Age start      | Age end | Model type | Direction | Covariate                                                                                                 |
|--------------|--------|----------------|---------|------------|-----------|-----------------------------------------------------------------------------------------------------------|
| Meningitis   | Female | 5 to 9         | 80 plus | Data Rich  | -1        | LDI (IS per capita)                                                                                       |
| Meningitis   | Female | Early Neonatal | 1 to 4  | Data Rich  | -1        | LDI (IS per capita)                                                                                       |
| Meningitis   | Female | 5 to 9         | 80 plus | Data Rich  | -1        | Maternal education (years per capita)                                                                     |
| Meningitis   | Female | Early Neonatal | 1 to 4  | Data Rich  | -1        | Maternal education (years per capita)                                                                     |
| Meningitis   | Female | 5 to 9         | 80 plus | Data Rich  | -1        | Proportion of total population covered by menafrivac initiative (meningitis meningococcal type A vaccine) |
| Meningitis   | Female | Early Neonatal | 1 to 4  | Data Rich  | -1        | Proportion of total population covered by menafrivac initiative (meningitis meningococcal type A vaccine) |
| Meningitis   | Female | 5 to 9         | 80 plus | Data Rich  | -1        | Sanitation (proportion with access)                                                                       |
| Meningitis   | Female | Early Neonatal | 1 to 4  | Data Rich  | -1        | Sanitation (proportion with access)                                                                       |
| Meningitis   | Female | 5 to 9         | 80 plus | Data Rich  | -1        | Sociodemographic Status                                                                                   |
| Meningitis   | Female | Early Neonatal | 1 to 4  | Data Rich  | -1        | Sociodemographic Status                                                                                   |
| Meningitis   | Female | 5 to 9         | 80 plus | Data Rich  | 1         | Malnutrition (proportion <2SD weight for age)                                                             |
| Meningitis   | Female | Early Neonatal | 1 to 4  | Data Rich  | 1         | Malnutrition (proportion <2SD weight for age)                                                             |
| Meningitis   | Female | 5 to 9         | 80 plus | Data Rich  | 1         | meningitis belt (proportion)                                                                              |
| Meningitis   | Female | Early Neonatal | 1 to 4  | Data Rich  | 1         | meningitis belt (proportion)                                                                              |
| Encephalitis | Male   | Early Neonatal | 80 plus | Global     | -1        | Health System Access 2 (unitless)                                                                         |
| Encephalitis | Male   | Early Neonatal | 80 plus | Global     | -1        | Improved Water Source (proportion with access)                                                            |
| Encephalitis | Male   | Early Neonatal | 80 plus | Global     | -1        | In-Facility Delivery (proportion)                                                                         |
| Encephalitis | Male   | Early Neonatal | 80 plus | Global     | -1        | LDI (IS per capita)                                                                                       |
| Encephalitis | Male   | Early Neonatal | 80 plus | Global     | -1        | Maternal education (years per capita)                                                                     |
| Encephalitis | Male   | Early Neonatal | 80 plus | Global     | -1        | Sanitation (proportion with access)                                                                       |
| Encephalitis | Male   | Early Neonatal | 80 plus | Global     | -1        | Sociodemographic Status                                                                                   |
| Encephalitis | Male   | Early Neonatal | 80 plus | Global     | 1         | Japanese encephalitis endemic area (binary)                                                               |
| Encephalitis | Male   | Early Neonatal | 80 plus | Global     | 1         | Malnutrition (proportion <2SD weight for age)                                                             |
| Encephalitis | Male   | Early Neonatal | 80 plus | Data Rich  | -1        | Health System Access 2 (unitless)                                                                         |
| Encephalitis | Male   | Early Neonatal | 80 plus | Data Rich  | -1        | Improved Water Source (proportion with access)                                                            |
| Encephalitis | Male   | Early Neonatal | 80 plus | Data Rich  | -1        | In-Facility Delivery (proportion)                                                                         |
| Encephalitis | Male   | Early Neonatal | 80 plus | Data Rich  | -1        | LDI (IS per capita)                                                                                       |
| Encephalitis | Male   | Early Neonatal | 80 plus | Data Rich  | -1        | Maternal education (years per capita)                                                                     |
| Encephalitis | Male   | Early Neonatal | 80 plus | Data Rich  | -1        | Sanitation (proportion with access)                                                                       |
| Encephalitis | Male   | Early Neonatal | 80 plus | Data Rich  | -1        | Sociodemographic Status                                                                                   |
| Encephalitis | Male   | Early Neonatal | 80 plus | Data Rich  | 1         | Japanese encephalitis endemic area (binary)                                                               |
| Encephalitis | Male   | Early Neonatal | 80 plus | Data Rich  | 1         | Malnutrition (proportion <2SD weight for age)                                                             |
| Encephalitis | Female | Early Neonatal | 80 plus | Global     | -1        | Health System Access 2 (unitless)                                                                         |
| Encephalitis | Female | Early Neonatal | 80 plus | Global     | -1        | Improved Water Source (proportion with access)                                                            |
| Encephalitis | Female | Early Neonatal | 80 plus | Global     | -1        | In-Facility Delivery (proportion)                                                                         |
| Encephalitis | Female | Early Neonatal | 80 plus | Global     | -1        | LDI (IS per capita)                                                                                       |
| Encephalitis | Female | Early Neonatal | 80 plus | Global     | -1        | Maternal education (years per capita)                                                                     |
| Encephalitis | Female | Early Neonatal | 80 plus | Global     | -1        | Sanitation (proportion with access)                                                                       |
| Encephalitis | Female | Early Neonatal | 80 plus | Global     | -1        | Sociodemographic Status                                                                                   |
| Encephalitis | Female | Early Neonatal | 80 plus | Global     | 1         | Japanese encephalitis endemic area (binary)                                                               |
| Encephalitis | Female | Early Neonatal | 80 plus | Global     | 1         | Malnutrition (proportion <2SD weight for age)                                                             |
| Encephalitis | Female | Early Neonatal | 80 plus | Data Rich  | -1        | Health System Access 2 (unitless)                                                                         |
| Encephalitis | Female | Early Neonatal | 80 plus | Data Rich  | -1        | Improved Water Source (proportion with access)                                                            |
| Encephalitis | Female | Early Neonatal | 80 plus | Data Rich  | -1        | In-Facility Delivery (proportion)                                                                         |

**Appendix Table 10: CODEm covariates used, level of covariate, and expected direction of covariate by cause, sex, and age**

| Cause        | Sex    | Age start      | Age end       | Model type | Direction | Covariate                                     |
|--------------|--------|----------------|---------------|------------|-----------|-----------------------------------------------|
| Encephalitis | Female | Early Neonatal | 80 plus       | Data Rich  | -1        | LDI (IS per capita)                           |
| Encephalitis | Female | Early Neonatal | 80 plus       | Data Rich  | -1        | Maternal education (years per capita)         |
| Encephalitis | Female | Early Neonatal | 80 plus       | Data Rich  | -1        | Sanitation (proportion with access)           |
| Encephalitis | Female | Early Neonatal | 80 plus       | Data Rich  | -1        | Sociodemographic Status                       |
| Encephalitis | Female | Early Neonatal | 80 plus       | Data Rich  | 1         | Japanese encephalitis endemic area (binary)   |
| Encephalitis | Female | Early Neonatal | 80 plus       | Data Rich  | 1         | Malnutrition (proportion <2SD weight for age) |
| Tetanus      | Male   | 1 to 4         | 80 plus       | Global     | -1        | DTP3 Coverage (proportion)                    |
| Tetanus      | Male   | Early Neonatal | Post Neonatal | Global     | -1        | DTP3 Coverage (proportion)                    |
| Tetanus      | Male   | 1 to 4         | 80 plus       | Global     | -1        | Education (years per capita)                  |
| Tetanus      | Male   | Early Neonatal | Post Neonatal | Global     | -1        | Education (years per capita)                  |
| Tetanus      | Male   | 1 to 4         | 80 plus       | Global     | -1        | Health System Access 2 (unitless)             |
| Tetanus      | Male   | Early Neonatal | Post Neonatal | Global     | -1        | Health System Access 2 (unitless)             |
| Tetanus      | Male   | Early Neonatal | Post Neonatal | Global     | -1        | In-Facility Delivery (proportion)             |
| Tetanus      | Male   | 1 to 4         | 80 plus       | Global     | -1        | LDI (IS per capita)                           |
| Tetanus      | Male   | Early Neonatal | Post Neonatal | Global     | -1        | LDI (IS per capita)                           |
| Tetanus      | Male   | 1 to 4         | 80 plus       | Global     | -1        | Sanitation (proportion with access)           |
| Tetanus      | Male   | Early Neonatal | Post Neonatal | Global     | -1        | Skilled Birth Attendance (proportion)         |
| Tetanus      | Male   | 1 to 4         | 80 plus       | Global     | -1        | Sociodemographic Status                       |
| Tetanus      | Male   | Early Neonatal | Post Neonatal | Global     | -1        | Sociodemographic Status                       |
| Tetanus      | Male   | Early Neonatal | Post Neonatal | Global     | -1        | Tetanus Toxoid Coverage Smooth (proportion)   |
| Tetanus      | Male   | 1 to 4         | 80 plus       | Data Rich  | -1        | DTP3 Coverage (proportion)                    |
| Tetanus      | Male   | Early Neonatal | Post Neonatal | Data Rich  | -1        | DTP3 Coverage (proportion)                    |
| Tetanus      | Male   | 1 to 4         | 80 plus       | Data Rich  | -1        | Education (years per capita)                  |
| Tetanus      | Male   | Early Neonatal | Post Neonatal | Data Rich  | -1        | Education (years per capita)                  |
| Tetanus      | Male   | 1 to 4         | 80 plus       | Data Rich  | -1        | Health System Access 2 (unitless)             |
| Tetanus      | Male   | Early Neonatal | Post Neonatal | Data Rich  | -1        | Health System Access 2 (unitless)             |
| Tetanus      | Male   | Early Neonatal | Post Neonatal | Data Rich  | -1        | In-Facility Delivery (proportion)             |
| Tetanus      | Male   | 1 to 4         | 80 plus       | Data Rich  | -1        | LDI (IS per capita)                           |
| Tetanus      | Male   | Early Neonatal | Post Neonatal | Data Rich  | -1        | LDI (IS per capita)                           |
| Tetanus      | Male   | 1 to 4         | 80 plus       | Data Rich  | -1        | Sanitation (proportion with access)           |
| Tetanus      | Male   | Early Neonatal | Post Neonatal | Data Rich  | -1        | Skilled Birth Attendance (proportion)         |
| Tetanus      | Male   | 1 to 4         | 80 plus       | Data Rich  | -1        | Sociodemographic Status                       |
| Tetanus      | Male   | Early Neonatal | Post Neonatal | Data Rich  | -1        | Sociodemographic Status                       |
| Tetanus      | Male   | Early Neonatal | Post Neonatal | Data Rich  | -1        | Tetanus Toxoid Coverage Smooth (proportion)   |
| Tetanus      | Female | 1 to 4         | 80 plus       | Global     | -1        | DTP3 Coverage (proportion)                    |
| Tetanus      | Female | Early Neonatal | Post Neonatal | Global     | -1        | DTP3 Coverage (proportion)                    |
| Tetanus      | Female | 1 to 4         | 80 plus       | Global     | -1        | Education (years per capita)                  |
| Tetanus      | Female | Early Neonatal | Post Neonatal | Global     | -1        | Education (years per capita)                  |
| Tetanus      | Female | 1 to 4         | 80 plus       | Global     | -1        | Health System Access 2 (unitless)             |
| Tetanus      | Female | Early Neonatal | Post Neonatal | Global     | -1        | Health System Access 2 (unitless)             |
| Tetanus      | Female | Early Neonatal | Post Neonatal | Global     | -1        | In-Facility Delivery (proportion)             |
| Tetanus      | Female | 1 to 4         | 80 plus       | Global     | -1        | LDI (IS per capita)                           |
| Tetanus      | Female | Early Neonatal | Post Neonatal | Global     | -1        | LDI (IS per capita)                           |
| Tetanus      | Female | 1 to 4         | 80 plus       | Global     | -1        | Sanitation (proportion with access)           |

**Appendix Table 10: CODEm covariates used, level of covariate, and expected direction of covariate by cause, sex, and age**

| Cause          | Sex    | Age start      | Age end       | Model type | Direction | Covariate                                                    |
|----------------|--------|----------------|---------------|------------|-----------|--------------------------------------------------------------|
| Tetanus        | Female | Early Neonatal | Post Neonatal | Global     | -1        | Skilled Birth Attendance (proportion)                        |
| Tetanus        | Female | 1 to 4         | 80 plus       | Global     | -1        | Sociodemographic Status                                      |
| Tetanus        | Female | Early Neonatal | Post Neonatal | Global     | -1        | Sociodemographic Status                                      |
| Tetanus        | Female | Early Neonatal | Post Neonatal | Global     | -1        | Tetanus Toxoid Coverage Smooth (proportion)                  |
| Tetanus        | Female | 1 to 4         | 80 plus       | Data Rich  | -1        | DTP3 Coverage (proportion)                                   |
| Tetanus        | Female | Early Neonatal | Post Neonatal | Data Rich  | -1        | DTP3 Coverage (proportion)                                   |
| Tetanus        | Female | 1 to 4         | 80 plus       | Data Rich  | -1        | Education (years per capita)                                 |
| Tetanus        | Female | Early Neonatal | Post Neonatal | Data Rich  | -1        | Education (years per capita)                                 |
| Tetanus        | Female | 1 to 4         | 80 plus       | Data Rich  | -1        | Health System Access 2 (unitless)                            |
| Tetanus        | Female | Early Neonatal | Post Neonatal | Data Rich  | -1        | Health System Access 2 (unitless)                            |
| Tetanus        | Female | Early Neonatal | Post Neonatal | Data Rich  | -1        | In-Facility Delivery (proportion)                            |
| Tetanus        | Female | 1 to 4         | 80 plus       | Data Rich  | -1        | LDI (IS per capita)                                          |
| Tetanus        | Female | Early Neonatal | Post Neonatal | Data Rich  | -1        | LDI (IS per capita)                                          |
| Tetanus        | Female | 1 to 4         | 80 plus       | Data Rich  | -1        | Sanitation (proportion with access)                          |
| Tetanus        | Female | Early Neonatal | Post Neonatal | Data Rich  | -1        | Skilled Birth Attendance (proportion)                        |
| Tetanus        | Female | 1 to 4         | 80 plus       | Data Rich  | -1        | Sociodemographic Status                                      |
| Tetanus        | Female | Early Neonatal | Post Neonatal | Data Rich  | -1        | Sociodemographic Status                                      |
| Tetanus        | Female | Early Neonatal | Post Neonatal | Data Rich  | -1        | Tetanus Toxoid Coverage Smooth (proportion)                  |
| Chagas disease | Male   | Post Neonatal  | 80 plus       | Default    | -1        | Education (years per capita)                                 |
| Chagas disease | Male   | Post Neonatal  | 80 plus       | Default    | -1        | Health System Access (unitless)                              |
| Chagas disease | Male   | Post Neonatal  | 80 plus       | Default    | -1        | LDI (IS per capita)                                          |
| Chagas disease | Male   | Post Neonatal  | 80 plus       | Default    | -1        | Sanitation (proportion with access)                          |
| Chagas disease | Male   | Post Neonatal  | 80 plus       | Default    | 1         | Chagas Population-at-Risk 2 (proportion)                     |
| Chagas disease | Male   | Post Neonatal  | 80 plus       | Default    | 1         | chagasPrevPAHO                                               |
| Chagas disease | Female | Post Neonatal  | 80 plus       | Default    | -1        | Education (years per capita)                                 |
| Chagas disease | Female | Post Neonatal  | 80 plus       | Default    | -1        | Health System Access (unitless)                              |
| Chagas disease | Female | Post Neonatal  | 80 plus       | Default    | -1        | LDI (IS per capita)                                          |
| Chagas disease | Female | Post Neonatal  | 80 plus       | Default    | -1        | Sanitation (proportion with access)                          |
| Chagas disease | Female | Post Neonatal  | 80 plus       | Default    | 1         | Chagas Population-at-Risk 2 (proportion)                     |
| Chagas disease | Female | Post Neonatal  | 80 plus       | Default    | 1         | chagasPrevPAHO                                               |
| Dengue         | Male   | Post Neonatal  | 80 plus       | Global     | 0         | Education (years per capita)                                 |
| Dengue         | Male   | Post Neonatal  | 80 plus       | Global     | 0         | Health System Access (unitless)                              |
| Dengue         | Male   | Post Neonatal  | 80 plus       | Global     | 0         | LDI (IS per capita)                                          |
| Dengue         | Male   | Post Neonatal  | 80 plus       | Global     | 0         | Sociodemographic Status                                      |
| Dengue         | Male   | Post Neonatal  | 80 plus       | Global     | 1         | Dengue anomalies (deviation from mean dengue incidence rate) |
| Dengue         | Male   | Post Neonatal  | 80 plus       | Global     | 1         | Dengue outbreaks (binary)                                    |
| Dengue         | Male   | Post Neonatal  | 80 plus       | Global     | 1         | Elevation Under 100m (proportion)                            |
| Dengue         | Male   | Post Neonatal  | 80 plus       | Global     | 1         | Latitude Under 15 (proportion)                               |
| Dengue         | Male   | Post Neonatal  | 80 plus       | Global     | 1         | Population Density (over 1000 ppl/sqkm, proportion)          |
| Dengue         | Male   | Post Neonatal  | 80 plus       | Global     | 1         | Population weighted probability of dengue transmission       |
| Dengue         | Male   | Post Neonatal  | 80 plus       | Global     | 1         | Rainfall Quintile 4 (proportion)                             |
| Dengue         | Male   | Post Neonatal  | 80 plus       | Global     | 1         | Rainfall Quintile 5 (proportion)                             |
| Dengue         | Male   | Post Neonatal  | 80 plus       | Data Rich  | 0         | Education (years per capita)                                 |
| Dengue         | Male   | Post Neonatal  | 80 plus       | Data Rich  | 0         | Health System Access (unitless)                              |

**Appendix Table 10: CODEm covariates used, level of covariate, and expected direction of covariate by cause, sex, and age**

| Cause  | Sex    | Age start     | Age end | Model type | Direction | Covariate                                                    |
|--------|--------|---------------|---------|------------|-----------|--------------------------------------------------------------|
| Dengue | Male   | Post Neonatal | 80 plus | Data Rich  | 0         | LDI (IS per capita)                                          |
| Dengue | Male   | Post Neonatal | 80 plus | Data Rich  | 0         | Sociodemographic Status                                      |
| Dengue | Male   | Post Neonatal | 80 plus | Data Rich  | 1         | Dengue anomalies (deviation from mean dengue incidence rate) |
| Dengue | Male   | Post Neonatal | 80 plus | Data Rich  | 1         | Dengue outbreaks (binary)                                    |
| Dengue | Male   | Post Neonatal | 80 plus | Data Rich  | 1         | Elevation Under 100m (proportion)                            |
| Dengue | Male   | Post Neonatal | 80 plus | Data Rich  | 1         | Latitude Under 15 (proportion)                               |
| Dengue | Male   | Post Neonatal | 80 plus | Data Rich  | 1         | Population Density (over 1000 ppl/sqkm, proportion)          |
| Dengue | Male   | Post Neonatal | 80 plus | Data Rich  | 1         | Population weighted probability of dengue transmission       |
| Dengue | Male   | Post Neonatal | 80 plus | Data Rich  | 1         | Rainfall Quintile 4 (proportion)                             |
| Dengue | Male   | Post Neonatal | 80 plus | Data Rich  | 1         | Rainfall Quintile 5 (proportion)                             |
| Dengue | Female | Post Neonatal | 80 plus | Global     | 0         | Education (years per capita)                                 |
| Dengue | Female | Post Neonatal | 80 plus | Global     | 0         | Health System Access (unitless)                              |
| Dengue | Female | Post Neonatal | 80 plus | Global     | 0         | LDI (IS per capita)                                          |
| Dengue | Female | Post Neonatal | 80 plus | Global     | 0         | Sociodemographic Status                                      |
| Dengue | Female | Post Neonatal | 80 plus | Global     | 1         | Dengue anomalies (deviation from mean dengue incidence rate) |
| Dengue | Female | Post Neonatal | 80 plus | Global     | 1         | Dengue outbreaks (binary)                                    |
| Dengue | Female | Post Neonatal | 80 plus | Global     | 1         | Elevation Under 100m (proportion)                            |
| Dengue | Female | Post Neonatal | 80 plus | Global     | 1         | Latitude Under 15 (proportion)                               |
| Dengue | Female | Post Neonatal | 80 plus | Global     | 1         | Population Density (over 1000 ppl/sqkm, proportion)          |
| Dengue | Female | Post Neonatal | 80 plus | Global     | 1         | Population weighted probability of dengue transmission       |
| Dengue | Female | Post Neonatal | 80 plus | Global     | 1         | Rainfall Quintile 4 (proportion)                             |
| Dengue | Female | Post Neonatal | 80 plus | Global     | 1         | Rainfall Quintile 5 (proportion)                             |
| Dengue | Female | Post Neonatal | 80 plus | Data Rich  | 0         | Education (years per capita)                                 |
| Dengue | Female | Post Neonatal | 80 plus | Data Rich  | 0         | Health System Access (unitless)                              |
| Dengue | Female | Post Neonatal | 80 plus | Data Rich  | 0         | LDI (IS per capita)                                          |
| Dengue | Female | Post Neonatal | 80 plus | Data Rich  | 0         | Sociodemographic Status                                      |
| Dengue | Female | Post Neonatal | 80 plus | Data Rich  | 1         | Dengue anomalies (deviation from mean dengue incidence rate) |
| Dengue | Female | Post Neonatal | 80 plus | Data Rich  | 1         | Dengue outbreaks (binary)                                    |
| Dengue | Female | Post Neonatal | 80 plus | Data Rich  | 1         | Elevation Under 100m (proportion)                            |
| Dengue | Female | Post Neonatal | 80 plus | Data Rich  | 1         | Latitude Under 15 (proportion)                               |
| Dengue | Female | Post Neonatal | 80 plus | Data Rich  | 1         | Population Density (over 1000 ppl/sqkm, proportion)          |
| Dengue | Female | Post Neonatal | 80 plus | Data Rich  | 1         | Population weighted probability of dengue transmission       |
| Dengue | Female | Post Neonatal | 80 plus | Data Rich  | 1         | Rainfall Quintile 4 (proportion)                             |
| Dengue | Female | Post Neonatal | 80 plus | Data Rich  | 1         | Rainfall Quintile 5 (proportion)                             |
| Rabies | Male   | Post Neonatal | 80 plus | Global     | -1        | Antenatal Care (4 visits) Coverage (proportion)              |
| Rabies | Male   | Post Neonatal | 80 plus | Global     | -1        | Health System Access (unitless)                              |
| Rabies | Male   | Post Neonatal | 80 plus | Global     | -1        | In-Facility Delivery (proportion)                            |
| Rabies | Male   | Post Neonatal | 80 plus | Global     | -1        | Skilled Birth Attendance (proportion)                        |
| Rabies | Male   | Post Neonatal | 80 plus | Global     | -1        | Sociodemographic Status                                      |
| Rabies | Male   | Post Neonatal | 80 plus | Global     | 0         | Population Density (500-1000 ppl/sqkm, proportion)           |
| Rabies | Male   | Post Neonatal | 80 plus | Global     | 0         | Population Density (under 150 ppl/sqkm, proportion)          |
| Rabies | Male   | Post Neonatal | 80 plus | Data Rich  | -1        | Antenatal Care (4 visits) Coverage (proportion)              |
| Rabies | Male   | Post Neonatal | 80 plus | Data Rich  | -1        | Health System Access (unitless)                              |
| Rabies | Male   | Post Neonatal | 80 plus | Data Rich  | -1        | In-Facility Delivery (proportion)                            |

**Appendix Table 10: CODEm covariates used, level of covariate, and expected direction of covariate by cause, sex, and age**

| Cause                             | Sex    | Age start      | Age end | Model type | Direction | Covariate                                           |
|-----------------------------------|--------|----------------|---------|------------|-----------|-----------------------------------------------------|
| Rabies                            | Male   | Post Neonatal  | 80 plus | Data Rich  | -1        | Skilled Birth Attendance (proportion)               |
| Rabies                            | Male   | Post Neonatal  | 80 plus | Data Rich  | -1        | Sociodemographic Status                             |
| Rabies                            | Male   | Post Neonatal  | 80 plus | Data Rich  | 0         | Population Density (500-1000 ppl/sqkm, proportion)  |
| Rabies                            | Male   | Post Neonatal  | 80 plus | Data Rich  | 0         | Population Density (under 150 ppl/sqkm, proportion) |
| Rabies                            | Female | Post Neonatal  | 80 plus | Global     | -1        | Antenatal Care (4 visits) Coverage (proportion)     |
| Rabies                            | Female | Post Neonatal  | 80 plus | Global     | -1        | Health System Access (unitless)                     |
| Rabies                            | Female | Post Neonatal  | 80 plus | Global     | -1        | In-Facility Delivery (proportion)                   |
| Rabies                            | Female | Post Neonatal  | 80 plus | Global     | -1        | Skilled Birth Attendance (proportion)               |
| Rabies                            | Female | Post Neonatal  | 80 plus | Global     | -1        | Sociodemographic Status                             |
| Rabies                            | Female | Post Neonatal  | 80 plus | Global     | 0         | Population Density (500-1000 ppl/sqkm, proportion)  |
| Rabies                            | Female | Post Neonatal  | 80 plus | Global     | 0         | Population Density (under 150 ppl/sqkm, proportion) |
| Rabies                            | Female | Post Neonatal  | 80 plus | Data Rich  | -1        | Antenatal Care (4 visits) Coverage (proportion)     |
| Rabies                            | Female | Post Neonatal  | 80 plus | Data Rich  | -1        | Health System Access (unitless)                     |
| Rabies                            | Female | Post Neonatal  | 80 plus | Data Rich  | -1        | In-Facility Delivery (proportion)                   |
| Rabies                            | Female | Post Neonatal  | 80 plus | Data Rich  | -1        | Skilled Birth Attendance (proportion)               |
| Rabies                            | Female | Post Neonatal  | 80 plus | Data Rich  | -1        | Sociodemographic Status                             |
| Rabies                            | Female | Post Neonatal  | 80 plus | Data Rich  | 0         | Population Density (500-1000 ppl/sqkm, proportion)  |
| Rabies                            | Female | Post Neonatal  | 80 plus | Data Rich  | 0         | Population Density (under 150 ppl/sqkm, proportion) |
| Other neglected tropical diseases | Male   | Early Neonatal | 80 plus | Global     | -1        | Education (years per capita)                        |
| Other neglected tropical diseases | Male   | Early Neonatal | 80 plus | Global     | -1        | Health System Access 2 (unitless)                   |
| Other neglected tropical diseases | Male   | Early Neonatal | 80 plus | Global     | -1        | LDI (IS per capita)                                 |
| Other neglected tropical diseases | Male   | Early Neonatal | 80 plus | Global     | -1        | Sanitation (proportion with access)                 |
| Other neglected tropical diseases | Male   | Early Neonatal | 80 plus | Global     | -1        | Sociodemographic Status                             |
| Other neglected tropical diseases | Male   | Early Neonatal | 80 plus | Global     | 1         | Latitude Under 15 (proportion)                      |
| Other neglected tropical diseases | Male   | Early Neonatal | 80 plus | Global     | 1         | Rainfall Quintile 5 (proportion)                    |
| Other neglected tropical diseases | Male   | Early Neonatal | 80 plus | Data Rich  | -1        | Education (years per capita)                        |
| Other neglected tropical diseases | Male   | Early Neonatal | 80 plus | Data Rich  | -1        | Health System Access 2 (unitless)                   |
| Other neglected tropical diseases | Male   | Early Neonatal | 80 plus | Data Rich  | -1        | LDI (IS per capita)                                 |
| Other neglected tropical diseases | Male   | Early Neonatal | 80 plus | Data Rich  | -1        | Sanitation (proportion with access)                 |
| Other neglected tropical diseases | Male   | Early Neonatal | 80 plus | Data Rich  | -1        | Sociodemographic Status                             |
| Other neglected tropical diseases | Male   | Early Neonatal | 80 plus | Data Rich  | 1         | Latitude Under 15 (proportion)                      |
| Other neglected tropical diseases | Male   | Early Neonatal | 80 plus | Data Rich  | 1         | Rainfall Quintile 5 (proportion)                    |
| Other neglected tropical diseases | Female | Early Neonatal | 80 plus | Global     | -1        | Education (years per capita)                        |
| Other neglected tropical diseases | Female | Early Neonatal | 80 plus | Global     | -1        | Health System Access 2 (unitless)                   |
| Other neglected tropical diseases | Female | Early Neonatal | 80 plus | Global     | -1        | LDI (IS per capita)                                 |
| Other neglected tropical diseases | Female | Early Neonatal | 80 plus | Global     | -1        | Sanitation (proportion with access)                 |
| Other neglected tropical diseases | Female | Early Neonatal | 80 plus | Global     | -1        | Sociodemographic Status                             |
| Other neglected tropical diseases | Female | Early Neonatal | 80 plus | Global     | 1         | Latitude Under 15 (proportion)                      |
| Other neglected tropical diseases | Female | Early Neonatal | 80 plus | Global     | 1         | Rainfall Quintile 5 (proportion)                    |
| Other neglected tropical diseases | Female | Early Neonatal | 80 plus | Data Rich  | -1        | Education (years per capita)                        |
| Other neglected tropical diseases | Female | Early Neonatal | 80 plus | Data Rich  | -1        | Health System Access 2 (unitless)                   |
| Other neglected tropical diseases | Female | Early Neonatal | 80 plus | Data Rich  | -1        | LDI (IS per capita)                                 |
| Other neglected tropical diseases | Female | Early Neonatal | 80 plus | Data Rich  | -1        | Sanitation (proportion with access)                 |
| Other neglected tropical diseases | Female | Early Neonatal | 80 plus | Data Rich  | -1        | Sociodemographic Status                             |

**Appendix Table 10: CODEm covariates used, level of covariate, and expected direction of covariate by cause, sex, and age**

| Cause                                | Sex    | Age start      | Age end | Model type | Direction | Covariate                                          |
|--------------------------------------|--------|----------------|---------|------------|-----------|----------------------------------------------------|
| Other neglected tropical diseases    | Female | Early Neonatal | 80 plus | Data Rich  | 1         | Latitude Under 15 (proportion)                     |
| Other neglected tropical diseases    | Female | Early Neonatal | 80 plus | Data Rich  | 1         | Rainfall Quintile 5 (proportion)                   |
| Neonatal disorders                   | Male   | Early Neonatal | 1 to 4  | Global     | -1        | Health System Access 2 (unitless)                  |
| Neonatal disorders                   | Male   | Early Neonatal | 1 to 4  | Global     | -1        | In-Facility Delivery (proportion)                  |
| Neonatal disorders                   | Male   | Early Neonatal | 1 to 4  | Global     | -1        | Sociodemographic Status                            |
| Neonatal disorders                   | Male   | Early Neonatal | 1 to 4  | Global     | 0         | Education (years per capita)                       |
| Neonatal disorders                   | Male   | Early Neonatal | 1 to 4  | Global     | 0         | Indoor Air Pollution (All Cooking Fuels)           |
| Neonatal disorders                   | Male   | Early Neonatal | 1 to 4  | Global     | 0         | LDI (IS per capita)                                |
| Neonatal disorders                   | Male   | Early Neonatal | 1 to 4  | Global     | 0         | Malnutrition (proportion <2SD weight for age)      |
| Neonatal disorders                   | Male   | Early Neonatal | 1 to 4  | Global     | 1         | Smoking Prevalence (Reproductive Age Standardised) |
| Neonatal disorders                   | Male   | Early Neonatal | 1 to 4  | Global     | 1         | Total Fertility Rate                               |
| Neonatal disorders                   | Male   | Early Neonatal | 1 to 4  | Data Rich  | -1        | Health System Access 2 (unitless)                  |
| Neonatal disorders                   | Male   | Early Neonatal | 1 to 4  | Data Rich  | -1        | In-Facility Delivery (proportion)                  |
| Neonatal disorders                   | Male   | Early Neonatal | 1 to 4  | Data Rich  | -1        | Sociodemographic Status                            |
| Neonatal disorders                   | Male   | Early Neonatal | 1 to 4  | Data Rich  | 0         | Education (years per capita)                       |
| Neonatal disorders                   | Male   | Early Neonatal | 1 to 4  | Data Rich  | 0         | Indoor Air Pollution (All Cooking Fuels)           |
| Neonatal disorders                   | Male   | Early Neonatal | 1 to 4  | Data Rich  | 0         | LDI (IS per capita)                                |
| Neonatal disorders                   | Male   | Early Neonatal | 1 to 4  | Data Rich  | 0         | Malnutrition (proportion <2SD weight for age)      |
| Neonatal disorders                   | Male   | Early Neonatal | 1 to 4  | Data Rich  | 1         | Smoking Prevalence (Reproductive Age Standardised) |
| Neonatal disorders                   | Male   | Early Neonatal | 1 to 4  | Data Rich  | 1         | Total Fertility Rate                               |
| Neonatal disorders                   | Female | Early Neonatal | 1 to 4  | Global     | -1        | Health System Access 2 (unitless)                  |
| Neonatal disorders                   | Female | Early Neonatal | 1 to 4  | Global     | -1        | In-Facility Delivery (proportion)                  |
| Neonatal disorders                   | Female | Early Neonatal | 1 to 4  | Global     | -1        | Sociodemographic Status                            |
| Neonatal disorders                   | Female | Early Neonatal | 1 to 4  | Global     | 0         | Education (years per capita)                       |
| Neonatal disorders                   | Female | Early Neonatal | 1 to 4  | Global     | 0         | Indoor Air Pollution (All Cooking Fuels)           |
| Neonatal disorders                   | Female | Early Neonatal | 1 to 4  | Global     | 0         | LDI (IS per capita)                                |
| Neonatal disorders                   | Female | Early Neonatal | 1 to 4  | Global     | 0         | Malnutrition (proportion <2SD weight for age)      |
| Neonatal disorders                   | Female | Early Neonatal | 1 to 4  | Global     | 1         | Smoking Prevalence (Reproductive Age Standardised) |
| Neonatal disorders                   | Female | Early Neonatal | 1 to 4  | Global     | 1         | Total Fertility Rate                               |
| Neonatal disorders                   | Female | Early Neonatal | 1 to 4  | Data Rich  | -1        | Health System Access 2 (unitless)                  |
| Neonatal disorders                   | Female | Early Neonatal | 1 to 4  | Data Rich  | -1        | In-Facility Delivery (proportion)                  |
| Neonatal disorders                   | Female | Early Neonatal | 1 to 4  | Data Rich  | -1        | Sociodemographic Status                            |
| Neonatal disorders                   | Female | Early Neonatal | 1 to 4  | Data Rich  | 0         | Education (years per capita)                       |
| Neonatal disorders                   | Female | Early Neonatal | 1 to 4  | Data Rich  | 0         | Indoor Air Pollution (All Cooking Fuels)           |
| Neonatal disorders                   | Female | Early Neonatal | 1 to 4  | Data Rich  | 0         | LDI (IS per capita)                                |
| Neonatal disorders                   | Female | Early Neonatal | 1 to 4  | Data Rich  | 0         | Malnutrition (proportion <2SD weight for age)      |
| Neonatal disorders                   | Female | Early Neonatal | 1 to 4  | Data Rich  | 1         | Smoking Prevalence (Reproductive Age Standardised) |
| Neonatal disorders                   | Female | Early Neonatal | 1 to 4  | Data Rich  | 1         | Total Fertility Rate                               |
| Neonatal preterm birth complications | Male   | Early Neonatal | 1 to 4  | Global     | -1        | Health System Access 2 (unitless)                  |
| Neonatal preterm birth complications | Male   | Early Neonatal | 1 to 4  | Global     | -1        | In-Facility Delivery (proportion)                  |
| Neonatal preterm birth complications | Male   | Early Neonatal | 1 to 4  | Global     | -1        | Sociodemographic Status                            |
| Neonatal preterm birth complications | Male   | Early Neonatal | 1 to 4  | Global     | 0         | Education (years per capita)                       |
| Neonatal preterm birth complications | Male   | Early Neonatal | 1 to 4  | Global     | 0         | LDI (IS per capita)                                |
| Neonatal preterm birth complications | Male   | Early Neonatal | 1 to 4  | Global     | 1         | Indoor Air Pollution (All Cooking Fuels)           |

**Appendix Table 10: CODEm covariates used, level of covariate, and expected direction of covariate by cause, sex, and age**

| Cause                                                    | Sex    | Age start      | Age end | Model type | Direction | Covariate                                          |
|----------------------------------------------------------|--------|----------------|---------|------------|-----------|----------------------------------------------------|
| Neonatal preterm birth complications                     | Male   | Early Neonatal | 1 to 4  | Global     | 1         | Live Births 35+ (proportion)                       |
| Neonatal preterm birth complications                     | Male   | Early Neonatal | 1 to 4  | Global     | 1         | Malnutrition (proportion <2SD weight for age)      |
| Neonatal preterm birth complications                     | Male   | Early Neonatal | 1 to 4  | Global     | 1         | Smoking Prevalence (Reproductive Age Standardised) |
| Neonatal preterm birth complications                     | Male   | Early Neonatal | 1 to 4  | Global     | 1         | Total Fertility Rate                               |
| Neonatal preterm birth complications                     | Male   | Early Neonatal | 1 to 4  | Data Rich  | -1        | Health System Access 2 (unitless)                  |
| Neonatal preterm birth complications                     | Male   | Early Neonatal | 1 to 4  | Data Rich  | -1        | Sociodemographic Status                            |
| Neonatal preterm birth complications                     | Male   | Early Neonatal | 1 to 4  | Data Rich  | 0         | Education (years per capita)                       |
| Neonatal preterm birth complications                     | Male   | Early Neonatal | 1 to 4  | Data Rich  | 0         | LDI (IS per capita)                                |
| Neonatal preterm birth complications                     | Male   | Early Neonatal | 1 to 4  | Data Rich  | 1         | In-Facility Delivery (proportion)                  |
| Neonatal preterm birth complications                     | Male   | Early Neonatal | 1 to 4  | Data Rich  | 1         | Indoor Air Pollution (All Cooking Fuels)           |
| Neonatal preterm birth complications                     | Male   | Early Neonatal | 1 to 4  | Data Rich  | 1         | Live Births 35+ (proportion)                       |
| Neonatal preterm birth complications                     | Male   | Early Neonatal | 1 to 4  | Data Rich  | 1         | Malnutrition (proportion <2SD weight for age)      |
| Neonatal preterm birth complications                     | Male   | Early Neonatal | 1 to 4  | Data Rich  | 1         | Smoking Prevalence (Reproductive Age Standardised) |
| Neonatal preterm birth complications                     | Male   | Early Neonatal | 1 to 4  | Data Rich  | 1         | Total Fertility Rate                               |
| Neonatal preterm birth complications                     | Female | Early Neonatal | 1 to 4  | Global     | -1        | Health System Access 2 (unitless)                  |
| Neonatal preterm birth complications                     | Female | Early Neonatal | 1 to 4  | Global     | -1        | In-Facility Delivery (proportion)                  |
| Neonatal preterm birth complications                     | Female | Early Neonatal | 1 to 4  | Global     | -1        | Sociodemographic Status                            |
| Neonatal preterm birth complications                     | Female | Early Neonatal | 1 to 4  | Global     | 0         | Education (years per capita)                       |
| Neonatal preterm birth complications                     | Female | Early Neonatal | 1 to 4  | Global     | 0         | LDI (IS per capita)                                |
| Neonatal preterm birth complications                     | Female | Early Neonatal | 1 to 4  | Global     | 1         | Indoor Air Pollution (All Cooking Fuels)           |
| Neonatal preterm birth complications                     | Female | Early Neonatal | 1 to 4  | Global     | 1         | Live Births 35+ (proportion)                       |
| Neonatal preterm birth complications                     | Female | Early Neonatal | 1 to 4  | Global     | 1         | Malnutrition (proportion <2SD weight for age)      |
| Neonatal preterm birth complications                     | Female | Early Neonatal | 1 to 4  | Global     | 1         | Smoking Prevalence (Reproductive Age Standardised) |
| Neonatal preterm birth complications                     | Female | Early Neonatal | 1 to 4  | Global     | 1         | Total Fertility Rate                               |
| Neonatal preterm birth complications                     | Female | Early Neonatal | 1 to 4  | Data Rich  | -1        | Health System Access 2 (unitless)                  |
| Neonatal preterm birth complications                     | Female | Early Neonatal | 1 to 4  | Data Rich  | -1        | In-Facility Delivery (proportion)                  |
| Neonatal preterm birth complications                     | Female | Early Neonatal | 1 to 4  | Data Rich  | -1        | Sociodemographic Status                            |
| Neonatal preterm birth complications                     | Female | Early Neonatal | 1 to 4  | Data Rich  | 0         | Education (years per capita)                       |
| Neonatal preterm birth complications                     | Female | Early Neonatal | 1 to 4  | Data Rich  | 0         | LDI (IS per capita)                                |
| Neonatal preterm birth complications                     | Female | Early Neonatal | 1 to 4  | Data Rich  | 1         | Indoor Air Pollution (All Cooking Fuels)           |
| Neonatal preterm birth complications                     | Female | Early Neonatal | 1 to 4  | Data Rich  | 1         | Live Births 35+ (proportion)                       |
| Neonatal preterm birth complications                     | Female | Early Neonatal | 1 to 4  | Data Rich  | 1         | Malnutrition (proportion <2SD weight for age)      |
| Neonatal preterm birth complications                     | Female | Early Neonatal | 1 to 4  | Data Rich  | 1         | Smoking Prevalence (Reproductive Age Standardised) |
| Neonatal preterm birth complications                     | Female | Early Neonatal | 1 to 4  | Data Rich  | 1         | Total Fertility Rate                               |
| Neonatal encephalopathy due to birth asphyxia and trauma | Male   | Early Neonatal | 1 to 4  | Global     | -1        | Education (years per capita)                       |
| Neonatal encephalopathy due to birth asphyxia and trauma | Male   | Early Neonatal | 1 to 4  | Global     | -1        | Health System Access 2 (unitless)                  |
| Neonatal encephalopathy due to birth asphyxia and trauma | Male   | Early Neonatal | 1 to 4  | Global     | -1        | In-Facility Delivery (proportion)                  |
| Neonatal encephalopathy due to birth asphyxia and trauma | Male   | Early Neonatal | 1 to 4  | Global     | -1        | LDI (IS per capita)                                |
| Neonatal encephalopathy due to birth asphyxia and trauma | Male   | Early Neonatal | 1 to 4  | Global     | -1        | Sociodemographic Status                            |
| Neonatal encephalopathy due to birth asphyxia and trauma | Male   | Early Neonatal | 1 to 4  | Global     | 1         | Indoor Air Pollution (All Cooking Fuels)           |
| Neonatal encephalopathy due to birth asphyxia and trauma | Male   | Early Neonatal | 1 to 4  | Global     | 1         | Malnutrition (proportion <2SD weight for age)      |
| Neonatal encephalopathy due to birth asphyxia and trauma | Male   | Early Neonatal | 1 to 4  | Global     | 1         | Smoking Prevalence (Reproductive Age Standardised) |
| Neonatal encephalopathy due to birth asphyxia and trauma | Male   | Early Neonatal | 1 to 4  | Global     | 1         | Total Fertility Rate                               |
| Neonatal encephalopathy due to birth asphyxia and trauma | Male   | Early Neonatal | 1 to 4  | Data Rich  | -1        | Education (years per capita)                       |

**Appendix Table 10: CODEm covariates used, level of covariate, and expected direction of covariate by cause, sex, and age**

| Cause                                                    | Sex    | Age start      | Age end | Model type | Direction | Covariate                                          |
|----------------------------------------------------------|--------|----------------|---------|------------|-----------|----------------------------------------------------|
| Neonatal encephalopathy due to birth asphyxia and trauma | Male   | Early Neonatal | 1 to 4  | Data Rich  | -1        | Health System Access 2 (unitless)                  |
| Neonatal encephalopathy due to birth asphyxia and trauma | Male   | Early Neonatal | 1 to 4  | Data Rich  | -1        | In-Facility Delivery (proportion)                  |
| Neonatal encephalopathy due to birth asphyxia and trauma | Male   | Early Neonatal | 1 to 4  | Data Rich  | -1        | LDI (IS per capita)                                |
| Neonatal encephalopathy due to birth asphyxia and trauma | Male   | Early Neonatal | 1 to 4  | Data Rich  | -1        | Sociodemographic Status                            |
| Neonatal encephalopathy due to birth asphyxia and trauma | Male   | Early Neonatal | 1 to 4  | Data Rich  | 1         | Indoor Air Pollution (All Cooking Fuels)           |
| Neonatal encephalopathy due to birth asphyxia and trauma | Male   | Early Neonatal | 1 to 4  | Data Rich  | 1         | Malnutrition (proportion <2SD weight for age)      |
| Neonatal encephalopathy due to birth asphyxia and trauma | Male   | Early Neonatal | 1 to 4  | Data Rich  | 1         | Smoking Prevalence (Reproductive Age Standardised) |
| Neonatal encephalopathy due to birth asphyxia and trauma | Male   | Early Neonatal | 1 to 4  | Data Rich  | 1         | Total Fertility Rate                               |
| Neonatal encephalopathy due to birth asphyxia and trauma | Female | Early Neonatal | 1 to 4  | Global     | -1        | Education (years per capita)                       |
| Neonatal encephalopathy due to birth asphyxia and trauma | Female | Early Neonatal | 1 to 4  | Global     | -1        | Health System Access 2 (unitless)                  |
| Neonatal encephalopathy due to birth asphyxia and trauma | Female | Early Neonatal | 1 to 4  | Global     | -1        | In-Facility Delivery (proportion)                  |
| Neonatal encephalopathy due to birth asphyxia and trauma | Female | Early Neonatal | 1 to 4  | Global     | -1        | LDI (IS per capita)                                |
| Neonatal encephalopathy due to birth asphyxia and trauma | Female | Early Neonatal | 1 to 4  | Global     | -1        | Sociodemographic Status                            |
| Neonatal encephalopathy due to birth asphyxia and trauma | Female | Early Neonatal | 1 to 4  | Global     | 1         | Indoor Air Pollution (All Cooking Fuels)           |
| Neonatal encephalopathy due to birth asphyxia and trauma | Female | Early Neonatal | 1 to 4  | Global     | 1         | Malnutrition (proportion <2SD weight for age)      |
| Neonatal encephalopathy due to birth asphyxia and trauma | Female | Early Neonatal | 1 to 4  | Global     | 1         | Smoking Prevalence (Reproductive Age Standardised) |
| Neonatal encephalopathy due to birth asphyxia and trauma | Female | Early Neonatal | 1 to 4  | Global     | 1         | Total Fertility Rate                               |
| Neonatal encephalopathy due to birth asphyxia and trauma | Female | Early Neonatal | 1 to 4  | Data Rich  | -1        | Education (years per capita)                       |
| Neonatal encephalopathy due to birth asphyxia and trauma | Female | Early Neonatal | 1 to 4  | Data Rich  | -1        | Health System Access 2 (unitless)                  |
| Neonatal encephalopathy due to birth asphyxia and trauma | Female | Early Neonatal | 1 to 4  | Data Rich  | -1        | In-Facility Delivery (proportion)                  |
| Neonatal encephalopathy due to birth asphyxia and trauma | Female | Early Neonatal | 1 to 4  | Data Rich  | -1        | LDI (IS per capita)                                |
| Neonatal encephalopathy due to birth asphyxia and trauma | Female | Early Neonatal | 1 to 4  | Data Rich  | -1        | Sociodemographic Status                            |
| Neonatal encephalopathy due to birth asphyxia and trauma | Female | Early Neonatal | 1 to 4  | Data Rich  | 1         | Indoor Air Pollution (All Cooking Fuels)           |
| Neonatal encephalopathy due to birth asphyxia and trauma | Female | Early Neonatal | 1 to 4  | Data Rich  | 1         | Malnutrition (proportion <2SD weight for age)      |
| Neonatal encephalopathy due to birth asphyxia and trauma | Female | Early Neonatal | 1 to 4  | Data Rich  | 1         | Smoking Prevalence (Reproductive Age Standardised) |
| Neonatal encephalopathy due to birth asphyxia and trauma | Female | Early Neonatal | 1 to 4  | Data Rich  | 1         | Total Fertility Rate                               |
| Neonatal sepsis and other neonatal infections            | Male   | Early Neonatal | 1 to 4  | Global     | -1        | Education (years per capita)                       |
| Neonatal sepsis and other neonatal infections            | Male   | Early Neonatal | 1 to 4  | Global     | -1        | Health System Access 2 (unitless)                  |
| Neonatal sepsis and other neonatal infections            | Male   | Early Neonatal | 1 to 4  | Global     | -1        | In-Facility Delivery (proportion)                  |
| Neonatal sepsis and other neonatal infections            | Male   | Early Neonatal | 1 to 4  | Global     | -1        | LDI (IS per capita)                                |
| Neonatal sepsis and other neonatal infections            | Male   | Early Neonatal | 1 to 4  | Global     | -1        | Sociodemographic Status                            |
| Neonatal sepsis and other neonatal infections            | Male   | Early Neonatal | 1 to 4  | Global     | 1         | Indoor Air Pollution (All Cooking Fuels)           |
| Neonatal sepsis and other neonatal infections            | Male   | Early Neonatal | 1 to 4  | Global     | 1         | Malnutrition (proportion <2SD weight for age)      |
| Neonatal sepsis and other neonatal infections            | Male   | Early Neonatal | 1 to 4  | Global     | 1         | Smoking Prevalence (Reproductive Age Standardised) |
| Neonatal sepsis and other neonatal infections            | Male   | Early Neonatal | 1 to 4  | Global     | 1         | Total Fertility Rate                               |
| Neonatal sepsis and other neonatal infections            | Male   | Early Neonatal | 1 to 4  | Data Rich  | -1        | Education (years per capita)                       |
| Neonatal sepsis and other neonatal infections            | Male   | Early Neonatal | 1 to 4  | Data Rich  | -1        | Health System Access 2 (unitless)                  |
| Neonatal sepsis and other neonatal infections            | Male   | Early Neonatal | 1 to 4  | Data Rich  | -1        | In-Facility Delivery (proportion)                  |
| Neonatal sepsis and other neonatal infections            | Male   | Early Neonatal | 1 to 4  | Data Rich  | -1        | LDI (IS per capita)                                |
| Neonatal sepsis and other neonatal infections            | Male   | Early Neonatal | 1 to 4  | Data Rich  | -1        | Sociodemographic Status                            |
| Neonatal sepsis and other neonatal infections            | Male   | Early Neonatal | 1 to 4  | Data Rich  | 1         | Indoor Air Pollution (All Cooking Fuels)           |
| Neonatal sepsis and other neonatal infections            | Male   | Early Neonatal | 1 to 4  | Data Rich  | 1         | Malnutrition (proportion <2SD weight for age)      |
| Neonatal sepsis and other neonatal infections            | Male   | Early Neonatal | 1 to 4  | Data Rich  | 1         | Smoking Prevalence (Reproductive Age Standardised) |
| Neonatal sepsis and other neonatal infections            | Male   | Early Neonatal | 1 to 4  | Data Rich  | 1         | Total Fertility Rate                               |



**Appendix Table 10: CODEm covariates used, level of covariate, and expected direction of covariate by cause, sex, and age**

| Cause                                         | Sex    | Age start      | Age end | Model type | Direction | Covariate                                          |
|-----------------------------------------------|--------|----------------|---------|------------|-----------|----------------------------------------------------|
| Neonatal sepsis and other neonatal infections | Female | Early Neonatal | 1 to 4  | Global     | -1        | Education (years per capita)                       |
| Neonatal sepsis and other neonatal infections | Female | Early Neonatal | 1 to 4  | Global     | -1        | Health System Access 2 (unitless)                  |
| Neonatal sepsis and other neonatal infections | Female | Early Neonatal | 1 to 4  | Global     | -1        | In-Facility Delivery (proportion)                  |
| Neonatal sepsis and other neonatal infections | Female | Early Neonatal | 1 to 4  | Global     | -1        | LDI (IS per capita)                                |
| Neonatal sepsis and other neonatal infections | Female | Early Neonatal | 1 to 4  | Global     | -1        | Sociodemographic Status                            |
| Neonatal sepsis and other neonatal infections | Female | Early Neonatal | 1 to 4  | Global     | 1         | Indoor Air Pollution (All Cooking Fuels)           |
| Neonatal sepsis and other neonatal infections | Female | Early Neonatal | 1 to 4  | Global     | 1         | Malnutrition (proportion <2SD weight for age)      |
| Neonatal sepsis and other neonatal infections | Female | Early Neonatal | 1 to 4  | Global     | 1         | Smoking Prevalence (Reproductive Age Standardised) |
| Neonatal sepsis and other neonatal infections | Female | Early Neonatal | 1 to 4  | Global     | 1         | Total Fertility Rate                               |
| Neonatal sepsis and other neonatal infections | Female | Early Neonatal | 1 to 4  | Data Rich  | -1        | Education (years per capita)                       |
| Neonatal sepsis and other neonatal infections | Female | Early Neonatal | 1 to 4  | Data Rich  | -1        | Health System Access 2 (unitless)                  |
| Neonatal sepsis and other neonatal infections | Female | Early Neonatal | 1 to 4  | Data Rich  | -1        | In-Facility Delivery (proportion)                  |
| Neonatal sepsis and other neonatal infections | Female | Early Neonatal | 1 to 4  | Data Rich  | -1        | LDI (IS per capita)                                |
| Neonatal sepsis and other neonatal infections | Female | Early Neonatal | 1 to 4  | Data Rich  | -1        | Sociodemographic Status                            |
| Neonatal sepsis and other neonatal infections | Female | Early Neonatal | 1 to 4  | Data Rich  | 1         | Indoor Air Pollution (All Cooking Fuels)           |
| Neonatal sepsis and other neonatal infections | Female | Early Neonatal | 1 to 4  | Data Rich  | 1         | Malnutrition (proportion <2SD weight for age)      |
| Neonatal sepsis and other neonatal infections | Female | Early Neonatal | 1 to 4  | Data Rich  | 1         | Smoking Prevalence (Reproductive Age Standardised) |
| Neonatal sepsis and other neonatal infections | Female | Early Neonatal | 1 to 4  | Data Rich  | 1         | Total Fertility Rate                               |
| Hemolytic disease and other neonatal jaundice | Male   | Early Neonatal | 1 to 4  | Global     | -1        | Antenatal Care (4 visits) Coverage (proportion)    |
| Hemolytic disease and other neonatal jaundice | Male   | Early Neonatal | 1 to 4  | Global     | -1        | Education (years per capita)                       |
| Hemolytic disease and other neonatal jaundice | Male   | Early Neonatal | 1 to 4  | Global     | -1        | Health System Access 2 (unitless)                  |
| Hemolytic disease and other neonatal jaundice | Male   | Early Neonatal | 1 to 4  | Global     | -1        | In-Facility Delivery (proportion)                  |
| Hemolytic disease and other neonatal jaundice | Male   | Early Neonatal | 1 to 4  | Global     | -1        | LDI (IS per capita)                                |
| Hemolytic disease and other neonatal jaundice | Male   | Early Neonatal | 1 to 4  | Global     | -1        | Skilled Birth Attendance (proportion)              |
| Hemolytic disease and other neonatal jaundice | Male   | Early Neonatal | 1 to 4  | Global     | -1        | Sociodemographic Status                            |
| Hemolytic disease and other neonatal jaundice | Male   | Early Neonatal | 1 to 4  | Global     | 1         | Total Fertility Rate                               |
| Hemolytic disease and other neonatal jaundice | Male   | Early Neonatal | 1 to 4  | Data Rich  | -1        | Antenatal Care (4 visits) Coverage (proportion)    |
| Hemolytic disease and other neonatal jaundice | Male   | Early Neonatal | 1 to 4  | Data Rich  | -1        | Education (years per capita)                       |
| Hemolytic disease and other neonatal jaundice | Male   | Early Neonatal | 1 to 4  | Data Rich  | -1        | Health System Access 2 (unitless)                  |
| Hemolytic disease and other neonatal jaundice | Male   | Early Neonatal | 1 to 4  | Data Rich  | -1        | In-Facility Delivery (proportion)                  |
| Hemolytic disease and other neonatal jaundice | Male   | Early Neonatal | 1 to 4  | Data Rich  | -1        | LDI (IS per capita)                                |
| Hemolytic disease and other neonatal jaundice | Male   | Early Neonatal | 1 to 4  | Data Rich  | -1        | Skilled Birth Attendance (proportion)              |
| Hemolytic disease and other neonatal jaundice | Male   | Early Neonatal | 1 to 4  | Data Rich  | -1        | Sociodemographic Status                            |
| Hemolytic disease and other neonatal jaundice | Male   | Early Neonatal | 1 to 4  | Data Rich  | 1         | Total Fertility Rate                               |
| Hemolytic disease and other neonatal jaundice | Female | Early Neonatal | 1 to 4  | Global     | -1        | Antenatal Care (4 visits) Coverage (proportion)    |
| Hemolytic disease and other neonatal jaundice | Female | Early Neonatal | 1 to 4  | Global     | -1        | Education (years per capita)                       |
| Hemolytic disease and other neonatal jaundice | Female | Early Neonatal | 1 to 4  | Global     | -1        | Health System Access 2 (unitless)                  |
| Hemolytic disease and other neonatal jaundice | Female | Early Neonatal | 1 to 4  | Global     | -1        | In-Facility Delivery (proportion)                  |
| Hemolytic disease and other neonatal jaundice | Female | Early Neonatal | 1 to 4  | Global     | -1        | LDI (IS per capita)                                |
| Hemolytic disease and other neonatal jaundice | Female | Early Neonatal | 1 to 4  | Global     | -1        | Skilled Birth Attendance (proportion)              |
| Hemolytic disease and other neonatal jaundice | Female | Early Neonatal | 1 to 4  | Global     | -1        | Sociodemographic Status                            |
| Hemolytic disease and other neonatal jaundice | Female | Early Neonatal | 1 to 4  | Global     | 1         | Total Fertility Rate                               |
| Hemolytic disease and other neonatal jaundice | Female | Early Neonatal | 1 to 4  | Data Rich  | -1        | Antenatal Care (4 visits) Coverage (proportion)    |
| Hemolytic disease and other neonatal jaundice | Female | Early Neonatal | 1 to 4  | Data Rich  | -1        | Education (years per capita)                       |

**Appendix Table 10: CODEm covariates used, level of covariate, and expected direction of covariate by cause, sex, and age**

| Cause                                         | Sex    | Age start      | Age end | Model type | Direction | Covariate                                          |
|-----------------------------------------------|--------|----------------|---------|------------|-----------|----------------------------------------------------|
| Hemolytic disease and other neonatal jaundice | Female | Early Neonatal | 1 to 4  | Data Rich  | -1        | Health System Access 2 (unitless)                  |
| Hemolytic disease and other neonatal jaundice | Female | Early Neonatal | 1 to 4  | Data Rich  | -1        | In-Facility Delivery (proportion)                  |
| Hemolytic disease and other neonatal jaundice | Female | Early Neonatal | 1 to 4  | Data Rich  | -1        | LDI (IS per capita)                                |
| Hemolytic disease and other neonatal jaundice | Female | Early Neonatal | 1 to 4  | Data Rich  | -1        | Skilled Birth Attendance (proportion)              |
| Hemolytic disease and other neonatal jaundice | Female | Early Neonatal | 1 to 4  | Data Rich  | -1        | Sociodemographic Status                            |
| Hemolytic disease and other neonatal jaundice | Female | Early Neonatal | 1 to 4  | Data Rich  | 1         | Total Fertility Rate                               |
| Other neonatal disorders                      | Male   | Early Neonatal | 1 to 4  | Global     | -1        | Education (years per capita)                       |
| Other neonatal disorders                      | Male   | Early Neonatal | 1 to 4  | Global     | -1        | Health System Access 2 (unitless)                  |
| Other neonatal disorders                      | Male   | Early Neonatal | 1 to 4  | Global     | -1        | Skilled Birth Attendance (proportion)              |
| Other neonatal disorders                      | Male   | Early Neonatal | 1 to 4  | Global     | -1        | Sociodemographic Status                            |
| Other neonatal disorders                      | Male   | Early Neonatal | 1 to 4  | Global     | 0         | LDI (IS per capita)                                |
| Other neonatal disorders                      | Male   | Early Neonatal | 1 to 4  | Global     | 1         | Indoor Air Pollution (All Cooking Fuels)           |
| Other neonatal disorders                      | Male   | Early Neonatal | 1 to 4  | Global     | 1         | Malnutrition (proportion <2SD weight for age)      |
| Other neonatal disorders                      | Male   | Early Neonatal | 1 to 4  | Global     | 1         | Smoking Prevalence (Reproductive Age Standardised) |
| Other neonatal disorders                      | Male   | Early Neonatal | 1 to 4  | Global     | 1         | Total Fertility Rate                               |
| Other neonatal disorders                      | Male   | Early Neonatal | 1 to 4  | Data Rich  | -1        | Education (years per capita)                       |
| Other neonatal disorders                      | Male   | Early Neonatal | 1 to 4  | Data Rich  | -1        | Health System Access 2 (unitless)                  |
| Other neonatal disorders                      | Male   | Early Neonatal | 1 to 4  | Data Rich  | -1        | Skilled Birth Attendance (proportion)              |
| Other neonatal disorders                      | Male   | Early Neonatal | 1 to 4  | Data Rich  | -1        | Sociodemographic Status                            |
| Other neonatal disorders                      | Male   | Early Neonatal | 1 to 4  | Data Rich  | 0         | LDI (IS per capita)                                |
| Other neonatal disorders                      | Male   | Early Neonatal | 1 to 4  | Data Rich  | 1         | Indoor Air Pollution (All Cooking Fuels)           |
| Other neonatal disorders                      | Male   | Early Neonatal | 1 to 4  | Data Rich  | 1         | Malnutrition (proportion <2SD weight for age)      |
| Other neonatal disorders                      | Male   | Early Neonatal | 1 to 4  | Data Rich  | 1         | Smoking Prevalence (Reproductive Age Standardised) |
| Other neonatal disorders                      | Male   | Early Neonatal | 1 to 4  | Data Rich  | 1         | Total Fertility Rate                               |
| Other neonatal disorders                      | Female | Early Neonatal | 1 to 4  | Global     | -1        | Education (years per capita)                       |
| Other neonatal disorders                      | Female | Early Neonatal | 1 to 4  | Global     | -1        | Health System Access 2 (unitless)                  |
| Other neonatal disorders                      | Female | Early Neonatal | 1 to 4  | Global     | -1        | Skilled Birth Attendance (proportion)              |
| Other neonatal disorders                      | Female | Early Neonatal | 1 to 4  | Global     | -1        | Sociodemographic Status                            |
| Other neonatal disorders                      | Female | Early Neonatal | 1 to 4  | Global     | 0         | LDI (IS per capita)                                |
| Other neonatal disorders                      | Female | Early Neonatal | 1 to 4  | Global     | 1         | Indoor Air Pollution (All Cooking Fuels)           |
| Other neonatal disorders                      | Female | Early Neonatal | 1 to 4  | Global     | 1         | Malnutrition (proportion <2SD weight for age)      |
| Other neonatal disorders                      | Female | Early Neonatal | 1 to 4  | Global     | 1         | Smoking Prevalence (Reproductive Age Standardised) |
| Other neonatal disorders                      | Female | Early Neonatal | 1 to 4  | Global     | 1         | Total Fertility Rate                               |
| Other neonatal disorders                      | Female | Early Neonatal | 1 to 4  | Data Rich  | -1        | Education (years per capita)                       |
| Other neonatal disorders                      | Female | Early Neonatal | 1 to 4  | Data Rich  | -1        | Health System Access 2 (unitless)                  |
| Other neonatal disorders                      | Female | Early Neonatal | 1 to 4  | Data Rich  | -1        | Skilled Birth Attendance (proportion)              |
| Other neonatal disorders                      | Female | Early Neonatal | 1 to 4  | Data Rich  | -1        | Sociodemographic Status                            |
| Other neonatal disorders                      | Female | Early Neonatal | 1 to 4  | Data Rich  | 0         | LDI (IS per capita)                                |
| Other neonatal disorders                      | Female | Early Neonatal | 1 to 4  | Data Rich  | 1         | Indoor Air Pollution (All Cooking Fuels)           |
| Other neonatal disorders                      | Female | Early Neonatal | 1 to 4  | Data Rich  | 1         | Malnutrition (proportion <2SD weight for age)      |
| Other neonatal disorders                      | Female | Early Neonatal | 1 to 4  | Data Rich  | 1         | Smoking Prevalence (Reproductive Age Standardised) |
| Other neonatal disorders                      | Female | Early Neonatal | 1 to 4  | Data Rich  | 1         | Total Fertility Rate                               |
| Nutritional deficiencies                      | Male   | Post Neonatal  | 80 plus | Global     | -1        | Education (years per capita)                       |
| Nutritional deficiencies                      | Male   | Post Neonatal  | 80 plus | Global     | -1        | Health System Access 2 (unitless)                  |

**Appendix Table 10: CODEm covariates used, level of covariate, and expected direction of covariate by cause, sex, and age**

| Cause                    | Sex    | Age start     | Age end | Model type | Direction | Covariate                                       |
|--------------------------|--------|---------------|---------|------------|-----------|-------------------------------------------------|
| Nutritional deficiencies | Male   | Post Neonatal | 80 plus | Global     | -1        | Improved Water Source (proportion with access)  |
| Nutritional deficiencies | Male   | Post Neonatal | 80 plus | Global     | -1        | LDI (IS per capita)                             |
| Nutritional deficiencies | Male   | Post Neonatal | 80 plus | Global     | -1        | Sanitation (proportion with access)             |
| Nutritional deficiencies | Male   | Post Neonatal | 80 plus | Global     | -1        | Sociodemographic Status                         |
| Nutritional deficiencies | Male   | Post Neonatal | 80 plus | Global     | -1        | Total Calories (kcal per capita)                |
| Nutritional deficiencies | Male   | Post Neonatal | 80 plus | Global     | 0         | Rainfall Quintile 1 (proportion)                |
| Nutritional deficiencies | Male   | Post Neonatal | 80 plus | Global     | 0         | Rainfall Quintile 2 (proportion)                |
| Nutritional deficiencies | Male   | Post Neonatal | 80 plus | Global     | 1         | Age-Standardize Prevalence of Severe Anemia     |
| Nutritional deficiencies | Male   | Post Neonatal | 80 plus | Global     | 1         | Famine (binary)                                 |
| Nutritional deficiencies | Male   | Post Neonatal | 80 plus | Global     | 1         | Malnutrition (proportion <2SD weight for age)   |
| Nutritional deficiencies | Male   | Post Neonatal | 80 plus | Global     | 1         | Mortality Rate Due to War Shocks (per 1 person) |
| Nutritional deficiencies | Male   | Post Neonatal | 80 plus | Data Rich  | -1        | Education (years per capita)                    |
| Nutritional deficiencies | Male   | Post Neonatal | 80 plus | Data Rich  | -1        | Health System Access 2 (unitless)               |
| Nutritional deficiencies | Male   | Post Neonatal | 80 plus | Data Rich  | -1        | Improved Water Source (proportion with access)  |
| Nutritional deficiencies | Male   | Post Neonatal | 80 plus | Data Rich  | -1        | LDI (IS per capita)                             |
| Nutritional deficiencies | Male   | Post Neonatal | 80 plus | Data Rich  | -1        | Sanitation (proportion with access)             |
| Nutritional deficiencies | Male   | Post Neonatal | 80 plus | Data Rich  | -1        | Sociodemographic Status                         |
| Nutritional deficiencies | Male   | Post Neonatal | 80 plus | Data Rich  | -1        | Total Calories (kcal per capita)                |
| Nutritional deficiencies | Male   | Post Neonatal | 80 plus | Data Rich  | 0         | Rainfall Quintile 1 (proportion)                |
| Nutritional deficiencies | Male   | Post Neonatal | 80 plus | Data Rich  | 0         | Rainfall Quintile 2 (proportion)                |
| Nutritional deficiencies | Male   | Post Neonatal | 80 plus | Data Rich  | 1         | Age-Standardize Prevalence of Severe Anemia     |
| Nutritional deficiencies | Male   | Post Neonatal | 80 plus | Data Rich  | 1         | Famine (binary)                                 |
| Nutritional deficiencies | Male   | Post Neonatal | 80 plus | Data Rich  | 1         | Malnutrition (proportion <2SD weight for age)   |
| Nutritional deficiencies | Male   | Post Neonatal | 80 plus | Data Rich  | 1         | Mortality Rate Due to War Shocks (per 1 person) |
| Nutritional deficiencies | Female | Post Neonatal | 80 plus | Global     | -1        | Education (years per capita)                    |
| Nutritional deficiencies | Female | Post Neonatal | 80 plus | Global     | -1        | Health System Access 2 (unitless)               |
| Nutritional deficiencies | Female | Post Neonatal | 80 plus | Global     | -1        | Improved Water Source (proportion with access)  |
| Nutritional deficiencies | Female | Post Neonatal | 80 plus | Global     | -1        | LDI (IS per capita)                             |
| Nutritional deficiencies | Female | Post Neonatal | 80 plus | Global     | -1        | Sanitation (proportion with access)             |
| Nutritional deficiencies | Female | Post Neonatal | 80 plus | Global     | -1        | Sociodemographic Status                         |
| Nutritional deficiencies | Female | Post Neonatal | 80 plus | Global     | -1        | Total Calories (kcal per capita)                |
| Nutritional deficiencies | Female | Post Neonatal | 80 plus | Global     | 0         | Rainfall Quintile 1 (proportion)                |
| Nutritional deficiencies | Female | Post Neonatal | 80 plus | Global     | 0         | Rainfall Quintile 2 (proportion)                |
| Nutritional deficiencies | Female | Post Neonatal | 80 plus | Global     | 1         | Age-Standardize Prevalence of Severe Anemia     |
| Nutritional deficiencies | Female | Post Neonatal | 80 plus | Global     | 1         | Famine (binary)                                 |
| Nutritional deficiencies | Female | Post Neonatal | 80 plus | Global     | 1         | Malnutrition (proportion <2SD weight for age)   |
| Nutritional deficiencies | Female | Post Neonatal | 80 plus | Global     | 1         | Mortality Rate Due to War Shocks (per 1 person) |
| Nutritional deficiencies | Female | Post Neonatal | 80 plus | Data Rich  | -1        | Education (years per capita)                    |
| Nutritional deficiencies | Female | Post Neonatal | 80 plus | Data Rich  | -1        | Health System Access 2 (unitless)               |
| Nutritional deficiencies | Female | Post Neonatal | 80 plus | Data Rich  | -1        | Improved Water Source (proportion with access)  |
| Nutritional deficiencies | Female | Post Neonatal | 80 plus | Data Rich  | -1        | LDI (IS per capita)                             |
| Nutritional deficiencies | Female | Post Neonatal | 80 plus | Data Rich  | -1        | Sanitation (proportion with access)             |
| Nutritional deficiencies | Female | Post Neonatal | 80 plus | Data Rich  | -1        | Sociodemographic Status                         |
| Nutritional deficiencies | Female | Post Neonatal | 80 plus | Data Rich  | -1        | Total Calories (kcal per capita)                |

**Appendix Table 10: CODEm covariates used, level of covariate, and expected direction of covariate by cause, sex, and age**

| Cause                       | Sex    | Age start     | Age end | Model type | Direction | Covariate                                       |
|-----------------------------|--------|---------------|---------|------------|-----------|-------------------------------------------------|
| Nutritional deficiencies    | Female | Post Neonatal | 80 plus | Data Rich  | 0         | Rainfall Quintile 1 (proportion)                |
| Nutritional deficiencies    | Female | Post Neonatal | 80 plus | Data Rich  | 0         | Rainfall Quintile 2 (proportion)                |
| Nutritional deficiencies    | Female | Post Neonatal | 80 plus | Data Rich  | 1         | Age-Standardize Prevalence of Severe Anemia     |
| Nutritional deficiencies    | Female | Post Neonatal | 80 plus | Data Rich  | 1         | Famine (binary)                                 |
| Nutritional deficiencies    | Female | Post Neonatal | 80 plus | Data Rich  | 1         | Malnutrition (proportion <2SD weight for age)   |
| Nutritional deficiencies    | Female | Post Neonatal | 80 plus | Data Rich  | 1         | Mortality Rate Due to War Shocks (per 1 person) |
| Protein-energy malnutrition | Male   | 5 to 9        | 80 plus | Global     | -1        | Education (years per capita)                    |
| Protein-energy malnutrition | Male   | Post Neonatal | 1 to 4  | Global     | -1        | Education (years per capita)                    |
| Protein-energy malnutrition | Male   | 5 to 9        | 80 plus | Global     | -1        | Health System Access 2 (unitless)               |
| Protein-energy malnutrition | Male   | Post Neonatal | 1 to 4  | Global     | -1        | Health System Access 2 (unitless)               |
| Protein-energy malnutrition | Male   | 5 to 9        | 80 plus | Global     | -1        | Improved Water Source (proportion with access)  |
| Protein-energy malnutrition | Male   | Post Neonatal | 1 to 4  | Global     | -1        | Improved Water Source (proportion with access)  |
| Protein-energy malnutrition | Male   | 5 to 9        | 80 plus | Global     | -1        | LDI (IS per capita)                             |
| Protein-energy malnutrition | Male   | Post Neonatal | 1 to 4  | Global     | -1        | LDI (IS per capita)                             |
| Protein-energy malnutrition | Male   | 5 to 9        | 80 plus | Global     | -1        | Sanitation (proportion with access)             |
| Protein-energy malnutrition | Male   | Post Neonatal | 1 to 4  | Global     | -1        | Sanitation (proportion with access)             |
| Protein-energy malnutrition | Male   | 5 to 9        | 80 plus | Global     | -1        | Sociodemographic Status                         |
| Protein-energy malnutrition | Male   | Post Neonatal | 1 to 4  | Global     | -1        | Sociodemographic Status                         |
| Protein-energy malnutrition | Male   | 5 to 9        | 80 plus | Global     | -1        | Total Calories (kcal per capita)                |
| Protein-energy malnutrition | Male   | Post Neonatal | 1 to 4  | Global     | -1        | Total Calories (kcal per capita)                |
| Protein-energy malnutrition | Male   | 5 to 9        | 80 plus | Global     | 0         | Rainfall Quintile 1 (proportion)                |
| Protein-energy malnutrition | Male   | Post Neonatal | 1 to 4  | Global     | 0         | Rainfall Quintile 1 (proportion)                |
| Protein-energy malnutrition | Male   | 5 to 9        | 80 plus | Global     | 0         | Rainfall Quintile 2 (proportion)                |
| Protein-energy malnutrition | Male   | Post Neonatal | 1 to 4  | Global     | 0         | Rainfall Quintile 2 (proportion)                |
| Protein-energy malnutrition | Male   | 5 to 9        | 80 plus | Global     | 1         | Age-Standardize Prevalence of Severe Anemia     |
| Protein-energy malnutrition | Male   | Post Neonatal | 1 to 4  | Global     | 1         | Age-Standardize Prevalence of Severe Anemia     |
| Protein-energy malnutrition | Male   | 5 to 9        | 80 plus | Global     | 1         | Famine (binary)                                 |
| Protein-energy malnutrition | Male   | Post Neonatal | 1 to 4  | Global     | 1         | Famine (binary)                                 |
| Protein-energy malnutrition | Male   | 5 to 9        | 80 plus | Global     | 1         | Malnutrition (proportion <2SD weight for age)   |
| Protein-energy malnutrition | Male   | Post Neonatal | 1 to 4  | Global     | 1         | Malnutrition (proportion <2SD weight for age)   |
| Protein-energy malnutrition | Male   | 5 to 9        | 80 plus | Global     | 1         | Mortality Rate Due to War Shocks (per 1 person) |
| Protein-energy malnutrition | Male   | Post Neonatal | 1 to 4  | Global     | 1         | Mortality Rate Due to War Shocks (per 1 person) |
| Protein-energy malnutrition | Male   | 5 to 9        | 80 plus | Data Rich  | -1        | Education (years per capita)                    |
| Protein-energy malnutrition | Male   | Post Neonatal | 1 to 4  | Data Rich  | -1        | Education (years per capita)                    |
| Protein-energy malnutrition | Male   | 5 to 9        | 80 plus | Data Rich  | -1        | Health System Access 2 (unitless)               |
| Protein-energy malnutrition | Male   | Post Neonatal | 1 to 4  | Data Rich  | -1        | Health System Access 2 (unitless)               |
| Protein-energy malnutrition | Male   | 5 to 9        | 80 plus | Data Rich  | -1        | Improved Water Source (proportion with access)  |
| Protein-energy malnutrition | Male   | Post Neonatal | 1 to 4  | Data Rich  | -1        | Improved Water Source (proportion with access)  |
| Protein-energy malnutrition | Male   | 5 to 9        | 80 plus | Data Rich  | -1        | LDI (IS per capita)                             |
| Protein-energy malnutrition | Male   | Post Neonatal | 1 to 4  | Data Rich  | -1        | LDI (IS per capita)                             |
| Protein-energy malnutrition | Male   | 5 to 9        | 80 plus | Data Rich  | -1        | Sanitation (proportion with access)             |
| Protein-energy malnutrition | Male   | Post Neonatal | 1 to 4  | Data Rich  | -1        | Sanitation (proportion with access)             |
| Protein-energy malnutrition | Male   | 5 to 9        | 80 plus | Data Rich  | -1        | Sociodemographic Status                         |
| Protein-energy malnutrition | Male   | Post Neonatal | 1 to 4  | Data Rich  | -1        | Sociodemographic Status                         |

**Appendix Table 10: CODEm covariates used, level of covariate, and expected direction of covariate by cause, sex, and age**

| Cause                       | Sex    | Age start     | Age end | Model type | Direction | Covariate                                       |
|-----------------------------|--------|---------------|---------|------------|-----------|-------------------------------------------------|
| Protein-energy malnutrition | Male   | 5 to 9        | 80 plus | Data Rich  | -1        | Total Calories (kcal per capita)                |
| Protein-energy malnutrition | Male   | Post Neonatal | 1 to 4  | Data Rich  | -1        | Total Calories (kcal per capita)                |
| Protein-energy malnutrition | Male   | 5 to 9        | 80 plus | Data Rich  | 0         | Rainfall Quintile 1 (proportion)                |
| Protein-energy malnutrition | Male   | Post Neonatal | 1 to 4  | Data Rich  | 0         | Rainfall Quintile 1 (proportion)                |
| Protein-energy malnutrition | Male   | 5 to 9        | 80 plus | Data Rich  | 0         | Rainfall Quintile 2 (proportion)                |
| Protein-energy malnutrition | Male   | Post Neonatal | 1 to 4  | Data Rich  | 0         | Rainfall Quintile 2 (proportion)                |
| Protein-energy malnutrition | Male   | 5 to 9        | 80 plus | Data Rich  | 1         | Age-Standardize Prevalence of Severe Anemia     |
| Protein-energy malnutrition | Male   | Post Neonatal | 1 to 4  | Data Rich  | 1         | Age-Standardize Prevalence of Severe Anemia     |
| Protein-energy malnutrition | Male   | 5 to 9        | 80 plus | Data Rich  | 1         | Famine (binary)                                 |
| Protein-energy malnutrition | Male   | Post Neonatal | 1 to 4  | Data Rich  | 1         | Famine (binary)                                 |
| Protein-energy malnutrition | Male   | 5 to 9        | 80 plus | Data Rich  | 1         | Malnutrition (proportion <2SD weight for age)   |
| Protein-energy malnutrition | Male   | Post Neonatal | 1 to 4  | Data Rich  | 1         | Malnutrition (proportion <2SD weight for age)   |
| Protein-energy malnutrition | Male   | 5 to 9        | 80 plus | Data Rich  | 1         | Mortality Rate Due to War Shocks (per 1 person) |
| Protein-energy malnutrition | Male   | Post Neonatal | 1 to 4  | Data Rich  | 1         | Mortality Rate Due to War Shocks (per 1 person) |
| Protein-energy malnutrition | Female | 5 to 9        | 80 plus | Global     | -1        | Education (years per capita)                    |
| Protein-energy malnutrition | Female | Post Neonatal | 1 to 4  | Global     | -1        | Education (years per capita)                    |
| Protein-energy malnutrition | Female | 5 to 9        | 80 plus | Global     | -1        | Health System Access 2 (unitless)               |
| Protein-energy malnutrition | Female | Post Neonatal | 1 to 4  | Global     | -1        | Health System Access 2 (unitless)               |
| Protein-energy malnutrition | Female | 5 to 9        | 80 plus | Global     | -1        | Improved Water Source (proportion with access)  |
| Protein-energy malnutrition | Female | Post Neonatal | 1 to 4  | Global     | -1        | Improved Water Source (proportion with access)  |
| Protein-energy malnutrition | Female | 5 to 9        | 80 plus | Global     | -1        | LDI (IS per capita)                             |
| Protein-energy malnutrition | Female | Post Neonatal | 1 to 4  | Global     | -1        | LDI (IS per capita)                             |
| Protein-energy malnutrition | Female | 5 to 9        | 80 plus | Global     | -1        | Sanitation (proportion with access)             |
| Protein-energy malnutrition | Female | Post Neonatal | 1 to 4  | Global     | -1        | Sanitation (proportion with access)             |
| Protein-energy malnutrition | Female | 5 to 9        | 80 plus | Global     | -1        | Sociodemographic Status                         |
| Protein-energy malnutrition | Female | Post Neonatal | 1 to 4  | Global     | -1        | Sociodemographic Status                         |
| Protein-energy malnutrition | Female | 5 to 9        | 80 plus | Global     | -1        | Total Calories (kcal per capita)                |
| Protein-energy malnutrition | Female | Post Neonatal | 1 to 4  | Global     | -1        | Total Calories (kcal per capita)                |
| Protein-energy malnutrition | Female | 5 to 9        | 80 plus | Global     | 0         | Rainfall Quintile 1 (proportion)                |
| Protein-energy malnutrition | Female | Post Neonatal | 1 to 4  | Global     | 0         | Rainfall Quintile 1 (proportion)                |
| Protein-energy malnutrition | Female | 5 to 9        | 80 plus | Global     | 0         | Rainfall Quintile 2 (proportion)                |
| Protein-energy malnutrition | Female | Post Neonatal | 1 to 4  | Global     | 0         | Rainfall Quintile 2 (proportion)                |
| Protein-energy malnutrition | Female | 5 to 9        | 80 plus | Global     | 1         | Age-Standardize Prevalence of Severe Anemia     |
| Protein-energy malnutrition | Female | Post Neonatal | 1 to 4  | Global     | 1         | Age-Standardize Prevalence of Severe Anemia     |
| Protein-energy malnutrition | Female | 5 to 9        | 80 plus | Global     | 1         | Famine (binary)                                 |
| Protein-energy malnutrition | Female | Post Neonatal | 1 to 4  | Global     | 1         | Famine (binary)                                 |
| Protein-energy malnutrition | Female | 5 to 9        | 80 plus | Global     | 1         | Malnutrition (proportion <2SD weight for age)   |
| Protein-energy malnutrition | Female | Post Neonatal | 1 to 4  | Global     | 1         | Malnutrition (proportion <2SD weight for age)   |
| Protein-energy malnutrition | Female | 5 to 9        | 80 plus | Global     | 1         | Mortality Rate Due to War Shocks (per 1 person) |
| Protein-energy malnutrition | Female | Post Neonatal | 1 to 4  | Global     | 1         | Mortality Rate Due to War Shocks (per 1 person) |
| Protein-energy malnutrition | Female | 5 to 9        | 80 plus | Data Rich  | -1        | Education (years per capita)                    |
| Protein-energy malnutrition | Female | Post Neonatal | 1 to 4  | Data Rich  | -1        | Education (years per capita)                    |
| Protein-energy malnutrition | Female | 5 to 9        | 80 plus | Data Rich  | -1        | Health System Access 2 (unitless)               |
| Protein-energy malnutrition | Female | Post Neonatal | 1 to 4  | Data Rich  | -1        | Health System Access 2 (unitless)               |

**Appendix Table 10: CODEm covariates used, level of covariate, and expected direction of covariate by cause, sex, and age**

| Cause                       | Sex    | Age start     | Age end | Model type | Direction | Covariate                                       |
|-----------------------------|--------|---------------|---------|------------|-----------|-------------------------------------------------|
| Protein-energy malnutrition | Female | 5 to 9        | 80 plus | Data Rich  | -1        | Improved Water Source (proportion with access)  |
| Protein-energy malnutrition | Female | Post Neonatal | 1 to 4  | Data Rich  | -1        | Improved Water Source (proportion with access)  |
| Protein-energy malnutrition | Female | 5 to 9        | 80 plus | Data Rich  | -1        | LDI (IS per capita)                             |
| Protein-energy malnutrition | Female | Post Neonatal | 1 to 4  | Data Rich  | -1        | LDI (IS per capita)                             |
| Protein-energy malnutrition | Female | 5 to 9        | 80 plus | Data Rich  | -1        | Sanitation (proportion with access)             |
| Protein-energy malnutrition | Female | Post Neonatal | 1 to 4  | Data Rich  | -1        | Sanitation (proportion with access)             |
| Protein-energy malnutrition | Female | 5 to 9        | 80 plus | Data Rich  | -1        | Sociodemographic Status                         |
| Protein-energy malnutrition | Female | Post Neonatal | 1 to 4  | Data Rich  | -1        | Sociodemographic Status                         |
| Protein-energy malnutrition | Female | 5 to 9        | 80 plus | Data Rich  | -1        | Total Calories (kcal per capita)                |
| Protein-energy malnutrition | Female | Post Neonatal | 1 to 4  | Data Rich  | -1        | Total Calories (kcal per capita)                |
| Protein-energy malnutrition | Female | 5 to 9        | 80 plus | Data Rich  | 0         | Rainfall Quintile 1 (proportion)                |
| Protein-energy malnutrition | Female | Post Neonatal | 1 to 4  | Data Rich  | 0         | Rainfall Quintile 1 (proportion)                |
| Protein-energy malnutrition | Female | 5 to 9        | 80 plus | Data Rich  | 0         | Rainfall Quintile 2 (proportion)                |
| Protein-energy malnutrition | Female | Post Neonatal | 1 to 4  | Data Rich  | 0         | Rainfall Quintile 2 (proportion)                |
| Protein-energy malnutrition | Female | 5 to 9        | 80 plus | Data Rich  | 1         | Age-Standardize Prevalence of Severe Anemia     |
| Protein-energy malnutrition | Female | Post Neonatal | 1 to 4  | Data Rich  | 1         | Age-Standardize Prevalence of Severe Anemia     |
| Protein-energy malnutrition | Female | 5 to 9        | 80 plus | Data Rich  | 1         | Famine (binary)                                 |
| Protein-energy malnutrition | Female | Post Neonatal | 1 to 4  | Data Rich  | 1         | Famine (binary)                                 |
| Protein-energy malnutrition | Female | 5 to 9        | 80 plus | Data Rich  | 1         | Malnutrition (proportion <2SD weight for age)   |
| Protein-energy malnutrition | Female | Post Neonatal | 1 to 4  | Data Rich  | 1         | Malnutrition (proportion <2SD weight for age)   |
| Protein-energy malnutrition | Female | 5 to 9        | 80 plus | Data Rich  | 1         | Mortality Rate Due to War Shocks (per 1 person) |
| Protein-energy malnutrition | Female | Post Neonatal | 1 to 4  | Data Rich  | 1         | Mortality Rate Due to War Shocks (per 1 person) |
| Iron-deficiency anemia      | Male   | Post Neonatal | 80 plus | Global     | -1        | Education (years per capita)                    |
| Iron-deficiency anemia      | Male   | Post Neonatal | 80 plus | Global     | -1        | Health System Access 2 (unitless)               |
| Iron-deficiency anemia      | Male   | Post Neonatal | 80 plus | Global     | -1        | Improved Water Source (proportion with access)  |
| Iron-deficiency anemia      | Male   | Post Neonatal | 80 plus | Global     | -1        | LDI (IS per capita)                             |
| Iron-deficiency anemia      | Male   | Post Neonatal | 80 plus | Global     | -1        | Sanitation (proportion with access)             |
| Iron-deficiency anemia      | Male   | Post Neonatal | 80 plus | Global     | -1        | Sociodemographic Status                         |
| Iron-deficiency anemia      | Male   | Post Neonatal | 80 plus | Global     | -1        | Total Calories (kcal per capita)                |
| Iron-deficiency anemia      | Male   | Post Neonatal | 80 plus | Global     | 0         | Rainfall Quintile 1 (proportion)                |
| Iron-deficiency anemia      | Male   | Post Neonatal | 80 plus | Global     | 0         | Rainfall Quintile 2 (proportion)                |
| Iron-deficiency anemia      | Male   | Post Neonatal | 80 plus | Global     | 1         | Age-Standardize Prevalence of Severe Anemia     |
| Iron-deficiency anemia      | Male   | Post Neonatal | 80 plus | Global     | 1         | Malnutrition (proportion <2SD weight for age)   |
| Iron-deficiency anemia      | Male   | Post Neonatal | 80 plus | Global     | 1         | Malnutrition Shock (binary)                     |
| Iron-deficiency anemia      | Male   | Post Neonatal | 80 plus | Global     | 1         | Mortality Rate Due to War Shocks (per 1 person) |
| Iron-deficiency anemia      | Male   | Post Neonatal | 80 plus | Data Rich  | -1        | Education (years per capita)                    |
| Iron-deficiency anemia      | Male   | Post Neonatal | 80 plus | Data Rich  | -1        | Health System Access 2 (unitless)               |
| Iron-deficiency anemia      | Male   | Post Neonatal | 80 plus | Data Rich  | -1        | Improved Water Source (proportion with access)  |
| Iron-deficiency anemia      | Male   | Post Neonatal | 80 plus | Data Rich  | -1        | LDI (IS per capita)                             |
| Iron-deficiency anemia      | Male   | Post Neonatal | 80 plus | Data Rich  | -1        | Sanitation (proportion with access)             |
| Iron-deficiency anemia      | Male   | Post Neonatal | 80 plus | Data Rich  | -1        | Sociodemographic Status                         |
| Iron-deficiency anemia      | Male   | Post Neonatal | 80 plus | Data Rich  | -1        | Total Calories (kcal per capita)                |
| Iron-deficiency anemia      | Male   | Post Neonatal | 80 plus | Data Rich  | 0         | Rainfall Quintile 1 (proportion)                |
| Iron-deficiency anemia      | Male   | Post Neonatal | 80 plus | Data Rich  | 0         | Rainfall Quintile 2 (proportion)                |

**Appendix Table 10: CODEm covariates used, level of covariate, and expected direction of covariate by cause, sex, and age**

| Cause                          | Sex    | Age start     | Age end | Model type | Direction | Covariate                                       |
|--------------------------------|--------|---------------|---------|------------|-----------|-------------------------------------------------|
| Iron-deficiency anemia         | Male   | Post Neonatal | 80 plus | Data Rich  | 1         | Age-Standardize Prevalence of Severe Anemia     |
| Iron-deficiency anemia         | Male   | Post Neonatal | 80 plus | Data Rich  | 1         | Malnutrition (proportion <2SD weight for age)   |
| Iron-deficiency anemia         | Male   | Post Neonatal | 80 plus | Data Rich  | 1         | Malnutrition Shock (binary)                     |
| Iron-deficiency anemia         | Male   | Post Neonatal | 80 plus | Data Rich  | 1         | Mortality Rate Due to War Shocks (per 1 person) |
| Iron-deficiency anemia         | Female | Post Neonatal | 80 plus | Global     | -1        | Education (years per capita)                    |
| Iron-deficiency anemia         | Female | Post Neonatal | 80 plus | Global     | -1        | Health System Access 2 (unitless)               |
| Iron-deficiency anemia         | Female | Post Neonatal | 80 plus | Global     | -1        | Improved Water Source (proportion with access)  |
| Iron-deficiency anemia         | Female | Post Neonatal | 80 plus | Global     | -1        | LDI (IS per capita)                             |
| Iron-deficiency anemia         | Female | Post Neonatal | 80 plus | Global     | -1        | Sanitation (proportion with access)             |
| Iron-deficiency anemia         | Female | Post Neonatal | 80 plus | Global     | -1        | Sociodemographic Status                         |
| Iron-deficiency anemia         | Female | Post Neonatal | 80 plus | Global     | -1        | Total Calories (kcal per capita)                |
| Iron-deficiency anemia         | Female | Post Neonatal | 80 plus | Global     | 0         | Rainfall Quintile 1 (proportion)                |
| Iron-deficiency anemia         | Female | Post Neonatal | 80 plus | Global     | 0         | Rainfall Quintile 2 (proportion)                |
| Iron-deficiency anemia         | Female | Post Neonatal | 80 plus | Global     | 1         | Age-Standardize Prevalence of Severe Anemia     |
| Iron-deficiency anemia         | Female | Post Neonatal | 80 plus | Global     | 1         | Malnutrition (proportion <2SD weight for age)   |
| Iron-deficiency anemia         | Female | Post Neonatal | 80 plus | Global     | 1         | Malnutrition Shock (binary)                     |
| Iron-deficiency anemia         | Female | Post Neonatal | 80 plus | Global     | 1         | Mortality Rate Due to War Shocks (per 1 person) |
| Iron-deficiency anemia         | Female | Post Neonatal | 80 plus | Data Rich  | -1        | Education (years per capita)                    |
| Iron-deficiency anemia         | Female | Post Neonatal | 80 plus | Data Rich  | -1        | Health System Access 2 (unitless)               |
| Iron-deficiency anemia         | Female | Post Neonatal | 80 plus | Data Rich  | -1        | Improved Water Source (proportion with access)  |
| Iron-deficiency anemia         | Female | Post Neonatal | 80 plus | Data Rich  | -1        | LDI (IS per capita)                             |
| Iron-deficiency anemia         | Female | Post Neonatal | 80 plus | Data Rich  | -1        | Sanitation (proportion with access)             |
| Iron-deficiency anemia         | Female | Post Neonatal | 80 plus | Data Rich  | -1        | Sociodemographic Status                         |
| Iron-deficiency anemia         | Female | Post Neonatal | 80 plus | Data Rich  | -1        | Total Calories (kcal per capita)                |
| Iron-deficiency anemia         | Female | Post Neonatal | 80 plus | Data Rich  | 0         | Rainfall Quintile 1 (proportion)                |
| Iron-deficiency anemia         | Female | Post Neonatal | 80 plus | Data Rich  | 0         | Rainfall Quintile 2 (proportion)                |
| Iron-deficiency anemia         | Female | Post Neonatal | 80 plus | Data Rich  | 1         | Age-Standardize Prevalence of Severe Anemia     |
| Iron-deficiency anemia         | Female | Post Neonatal | 80 plus | Data Rich  | 1         | Malnutrition (proportion <2SD weight for age)   |
| Iron-deficiency anemia         | Female | Post Neonatal | 80 plus | Data Rich  | 1         | Malnutrition Shock (binary)                     |
| Iron-deficiency anemia         | Female | Post Neonatal | 80 plus | Data Rich  | 1         | Mortality Rate Due to War Shocks (per 1 person) |
| Other nutritional deficiencies | Male   | Post Neonatal | 80 plus | Global     | -1        | Education (years per capita)                    |
| Other nutritional deficiencies | Male   | Post Neonatal | 80 plus | Global     | -1        | Health System Access 2 (unitless)               |
| Other nutritional deficiencies | Male   | Post Neonatal | 80 plus | Global     | -1        | Improved Water Source (proportion with access)  |
| Other nutritional deficiencies | Male   | Post Neonatal | 80 plus | Global     | -1        | LDI (IS per capita)                             |
| Other nutritional deficiencies | Male   | Post Neonatal | 80 plus | Global     | -1        | Sanitation (proportion with access)             |
| Other nutritional deficiencies | Male   | Post Neonatal | 80 plus | Global     | -1        | Sociodemographic Status                         |
| Other nutritional deficiencies | Male   | Post Neonatal | 80 plus | Global     | -1        | Total Calories (kcal per capita)                |
| Other nutritional deficiencies | Male   | Post Neonatal | 80 plus | Global     | 0         | Rainfall Quintile 1 (proportion)                |
| Other nutritional deficiencies | Male   | Post Neonatal | 80 plus | Global     | 0         | Rainfall Quintile 2 (proportion)                |
| Other nutritional deficiencies | Male   | Post Neonatal | 80 plus | Global     | 1         | Age-Standardize Prevalence of Severe Anemia     |
| Other nutritional deficiencies | Male   | Post Neonatal | 80 plus | Global     | 1         | Famine (binary)                                 |
| Other nutritional deficiencies | Male   | Post Neonatal | 80 plus | Global     | 1         | Malnutrition (proportion <2SD weight for age)   |
| Other nutritional deficiencies | Male   | Post Neonatal | 80 plus | Global     | 1         | Mortality Rate Due to War Shocks (per 1 person) |
| Other nutritional deficiencies | Male   | Post Neonatal | 80 plus | Data Rich  | -1        | Education (years per capita)                    |

**Appendix Table 10: CODEm covariates used, level of covariate, and expected direction of covariate by cause, sex, and age**

| Cause                                       | Sex    | Age start     | Age end | Model type | Direction | Covariate                                       |
|---------------------------------------------|--------|---------------|---------|------------|-----------|-------------------------------------------------|
| Other nutritional deficiencies              | Male   | Post Neonatal | 80 plus | Data Rich  | -1        | Health System Access 2 (unitless)               |
| Other nutritional deficiencies              | Male   | Post Neonatal | 80 plus | Data Rich  | -1        | Improved Water Source (proportion with access)  |
| Other nutritional deficiencies              | Male   | Post Neonatal | 80 plus | Data Rich  | -1        | LDI (IS per capita)                             |
| Other nutritional deficiencies              | Male   | Post Neonatal | 80 plus | Data Rich  | -1        | Sanitation (proportion with access)             |
| Other nutritional deficiencies              | Male   | Post Neonatal | 80 plus | Data Rich  | -1        | Sociodemographic Status                         |
| Other nutritional deficiencies              | Male   | Post Neonatal | 80 plus | Data Rich  | -1        | Total Calories (kcal per capita)                |
| Other nutritional deficiencies              | Male   | Post Neonatal | 80 plus | Data Rich  | 0         | Rainfall Quintile 1 (proportion)                |
| Other nutritional deficiencies              | Male   | Post Neonatal | 80 plus | Data Rich  | 0         | Rainfall Quintile 2 (proportion)                |
| Other nutritional deficiencies              | Male   | Post Neonatal | 80 plus | Data Rich  | 1         | Age-Standardize Prevalence of Severe Anemia     |
| Other nutritional deficiencies              | Male   | Post Neonatal | 80 plus | Data Rich  | 1         | Famine (binary)                                 |
| Other nutritional deficiencies              | Male   | Post Neonatal | 80 plus | Data Rich  | 1         | Malnutrition (proportion <2SD weight for age)   |
| Other nutritional deficiencies              | Male   | Post Neonatal | 80 plus | Data Rich  | 1         | Mortality Rate Due to War Shocks (per 1 person) |
| Other nutritional deficiencies              | Female | Post Neonatal | 80 plus | Global     | -1        | Education (years per capita)                    |
| Other nutritional deficiencies              | Female | Post Neonatal | 80 plus | Global     | -1        | Health System Access 2 (unitless)               |
| Other nutritional deficiencies              | Female | Post Neonatal | 80 plus | Global     | -1        | Improved Water Source (proportion with access)  |
| Other nutritional deficiencies              | Female | Post Neonatal | 80 plus | Global     | -1        | LDI (IS per capita)                             |
| Other nutritional deficiencies              | Female | Post Neonatal | 80 plus | Global     | -1        | Sanitation (proportion with access)             |
| Other nutritional deficiencies              | Female | Post Neonatal | 80 plus | Global     | -1        | Sociodemographic Status                         |
| Other nutritional deficiencies              | Female | Post Neonatal | 80 plus | Global     | -1        | Total Calories (kcal per capita)                |
| Other nutritional deficiencies              | Female | Post Neonatal | 80 plus | Global     | 0         | Rainfall Quintile 1 (proportion)                |
| Other nutritional deficiencies              | Female | Post Neonatal | 80 plus | Global     | 0         | Rainfall Quintile 2 (proportion)                |
| Other nutritional deficiencies              | Female | Post Neonatal | 80 plus | Global     | 1         | Age-Standardize Prevalence of Severe Anemia     |
| Other nutritional deficiencies              | Female | Post Neonatal | 80 plus | Global     | 1         | Famine (binary)                                 |
| Other nutritional deficiencies              | Female | Post Neonatal | 80 plus | Global     | 1         | Malnutrition (proportion <2SD weight for age)   |
| Other nutritional deficiencies              | Female | Post Neonatal | 80 plus | Global     | 1         | Mortality Rate Due to War Shocks (per 1 person) |
| Other nutritional deficiencies              | Female | Post Neonatal | 80 plus | Data Rich  | -1        | Education (years per capita)                    |
| Other nutritional deficiencies              | Female | Post Neonatal | 80 plus | Data Rich  | -1        | Health System Access 2 (unitless)               |
| Other nutritional deficiencies              | Female | Post Neonatal | 80 plus | Data Rich  | -1        | Improved Water Source (proportion with access)  |
| Other nutritional deficiencies              | Female | Post Neonatal | 80 plus | Data Rich  | -1        | LDI (IS per capita)                             |
| Other nutritional deficiencies              | Female | Post Neonatal | 80 plus | Data Rich  | -1        | Sanitation (proportion with access)             |
| Other nutritional deficiencies              | Female | Post Neonatal | 80 plus | Data Rich  | -1        | Sociodemographic Status                         |
| Other nutritional deficiencies              | Female | Post Neonatal | 80 plus | Data Rich  | -1        | Total Calories (kcal per capita)                |
| Other nutritional deficiencies              | Female | Post Neonatal | 80 plus | Data Rich  | 0         | Rainfall Quintile 1 (proportion)                |
| Other nutritional deficiencies              | Female | Post Neonatal | 80 plus | Data Rich  | 0         | Rainfall Quintile 2 (proportion)                |
| Other nutritional deficiencies              | Female | Post Neonatal | 80 plus | Data Rich  | 1         | Age-Standardize Prevalence of Severe Anemia     |
| Other nutritional deficiencies              | Female | Post Neonatal | 80 plus | Data Rich  | 1         | Famine (binary)                                 |
| Other nutritional deficiencies              | Female | Post Neonatal | 80 plus | Data Rich  | 1         | Malnutrition (proportion <2SD weight for age)   |
| Other nutritional deficiencies              | Female | Post Neonatal | 80 plus | Data Rich  | 1         | Mortality Rate Due to War Shocks (per 1 person) |
| Sexually transmitted diseases excluding HIV | Male   | 10 to 14      | 80 plus | Global     | -1        | Antenatal Care (1 visit) Coverage (proportion)  |
| Sexually transmitted diseases excluding HIV | Male   | 10 to 14      | 80 plus | Global     | -1        | Antenatal Care (4 visits) Coverage (proportion) |
| Sexually transmitted diseases excluding HIV | Male   | 10 to 14      | 80 plus | Global     | -1        | Education (years per capita)                    |
| Sexually transmitted diseases excluding HIV | Male   | 10 to 14      | 80 plus | Global     | -1        | Health System Access (capped)                   |
| Sexually transmitted diseases excluding HIV | Male   | 10 to 14      | 80 plus | Global     | -1        | LDI (IS per capita)                             |
| Sexually transmitted diseases excluding HIV | Male   | 10 to 14      | 80 plus | Global     | -1        | Legality of Abortion                            |



**Appendix Table 10: CODEm covariates used, level of covariate, and expected direction of covariate by cause, sex, and age**

| Cause                                       | Sex    | Age start     | Age end | Model type | Direction | Covariate                                       |
|---------------------------------------------|--------|---------------|---------|------------|-----------|-------------------------------------------------|
| Sexually transmitted diseases excluding HIV | Male   | 10 to 14      | 80 plus | Global     | 1         | Age-Specific Fertility Rate                     |
| Sexually transmitted diseases excluding HIV | Male   | 10 to 14      | 80 plus | Global     | 1         | Syphilis prevalence (proportion)                |
| Sexually transmitted diseases excluding HIV | Male   | 10 to 14      | 80 plus | Global     | 1         | Total Fertility Rate                            |
| Sexually transmitted diseases excluding HIV | Male   | 10 to 14      | 80 plus | Data Rich  | -1        | Antenatal Care (1 visit) Coverage (proportion)  |
| Sexually transmitted diseases excluding HIV | Male   | 10 to 14      | 80 plus | Data Rich  | -1        | Antenatal Care (4 visits) Coverage (proportion) |
| Sexually transmitted diseases excluding HIV | Male   | 10 to 14      | 80 plus | Data Rich  | -1        | Education (years per capita)                    |
| Sexually transmitted diseases excluding HIV | Male   | 10 to 14      | 80 plus | Data Rich  | -1        | Health System Access (capped)                   |
| Sexually transmitted diseases excluding HIV | Male   | 10 to 14      | 80 plus | Data Rich  | -1        | LDI (IS per capita)                             |
| Sexually transmitted diseases excluding HIV | Male   | 10 to 14      | 80 plus | Data Rich  | -1        | Legality of Abortion                            |
| Sexually transmitted diseases excluding HIV | Male   | 10 to 14      | 80 plus | Data Rich  | 1         | Age-Specific Fertility Rate                     |
| Sexually transmitted diseases excluding HIV | Male   | 10 to 14      | 80 plus | Data Rich  | 1         | Syphilis prevalence (proportion)                |
| Sexually transmitted diseases excluding HIV | Male   | 10 to 14      | 80 plus | Data Rich  | 1         | Total Fertility Rate                            |
| Sexually transmitted diseases excluding HIV | Female | 10 to 14      | 80 plus | Global     | -1        | Antenatal Care (1 visit) Coverage (proportion)  |
| Sexually transmitted diseases excluding HIV | Female | 10 to 14      | 80 plus | Global     | -1        | Antenatal Care (4 visits) Coverage (proportion) |
| Sexually transmitted diseases excluding HIV | Female | 10 to 14      | 80 plus | Global     | -1        | Education (years per capita)                    |
| Sexually transmitted diseases excluding HIV | Female | 10 to 14      | 80 plus | Global     | -1        | Health System Access (capped)                   |
| Sexually transmitted diseases excluding HIV | Female | 10 to 14      | 80 plus | Global     | -1        | LDI (IS per capita)                             |
| Sexually transmitted diseases excluding HIV | Female | 10 to 14      | 80 plus | Global     | -1        | Legality of Abortion                            |
| Sexually transmitted diseases excluding HIV | Female | 10 to 14      | 80 plus | Global     | 1         | Age-Specific Fertility Rate                     |
| Sexually transmitted diseases excluding HIV | Female | 10 to 14      | 80 plus | Global     | 1         | Syphilis prevalence (proportion)                |
| Sexually transmitted diseases excluding HIV | Female | 10 to 14      | 80 plus | Global     | 1         | Total Fertility Rate                            |
| Sexually transmitted diseases excluding HIV | Female | 10 to 14      | 80 plus | Data Rich  | -1        | Antenatal Care (1 visit) Coverage (proportion)  |
| Sexually transmitted diseases excluding HIV | Female | 10 to 14      | 80 plus | Data Rich  | -1        | Antenatal Care (4 visits) Coverage (proportion) |
| Sexually transmitted diseases excluding HIV | Female | 10 to 14      | 80 plus | Data Rich  | -1        | Education (years per capita)                    |
| Sexually transmitted diseases excluding HIV | Female | 10 to 14      | 80 plus | Data Rich  | -1        | Health System Access (capped)                   |
| Sexually transmitted diseases excluding HIV | Female | 10 to 14      | 80 plus | Data Rich  | -1        | LDI (IS per capita)                             |
| Sexually transmitted diseases excluding HIV | Female | 10 to 14      | 80 plus | Data Rich  | -1        | Legality of Abortion                            |
| Sexually transmitted diseases excluding HIV | Female | 10 to 14      | 80 plus | Data Rich  | 1         | Age-Specific Fertility Rate                     |
| Sexually transmitted diseases excluding HIV | Female | 10 to 14      | 80 plus | Data Rich  | 1         | Syphilis prevalence (proportion)                |
| Sexually transmitted diseases excluding HIV | Female | 10 to 14      | 80 plus | Data Rich  | 1         | Total Fertility Rate                            |
| Hepatitis                                   | Male   | Post Neonatal | 80 plus | Global     | -1        | Education (years per capita)                    |
| Hepatitis                                   | Male   | Post Neonatal | 80 plus | Global     | -1        | Health System Access 2 (unitless)               |
| Hepatitis                                   | Male   | Post Neonatal | 80 plus | Global     | -1        | Improved Water Source (proportion with access)  |
| Hepatitis                                   | Male   | Post Neonatal | 80 plus | Global     | -1        | LDI (IS per capita)                             |
| Hepatitis                                   | Male   | Post Neonatal | 80 plus | Global     | -1        | Sanitation (proportion with access)             |
| Hepatitis                                   | Male   | Post Neonatal | 80 plus | Global     | -1        | Sociodemographic Status                         |
| Hepatitis                                   | Male   | Post Neonatal | 80 plus | Global     | 1         | Hepatitis B (HBsAg) Seroprevalence (GBD 2015)   |
| Hepatitis                                   | Male   | Post Neonatal | 80 plus | Global     | 1         | Hepatitis C (IgG) Seroprevalence (GBD 2015)     |
| Hepatitis                                   | Male   | Post Neonatal | 80 plus | Global     | 1         | Log-transformed SEV scalar: Hep                 |
| Hepatitis                                   | Male   | Post Neonatal | 80 plus | Global     | 1         | Seroprevalence of anti-HAV (IgG)                |
| Hepatitis                                   | Male   | Post Neonatal | 80 plus | Global     | 1         | Seroprevalence of anti-HEV (IgG)                |
| Hepatitis                                   | Male   | Post Neonatal | 80 plus | Data Rich  | -1        | Education (years per capita)                    |
| Hepatitis                                   | Male   | Post Neonatal | 80 plus | Data Rich  | -1        | Health System Access 2 (unitless)               |
| Hepatitis                                   | Male   | Post Neonatal | 80 plus | Data Rich  | -1        | Improved Water Source (proportion with access)  |

**Appendix Table 10: CODEm covariates used, level of covariate, and expected direction of covariate by cause, sex, and age**

| Cause                     | Sex    | Age start      | Age end | Model type | Direction | Covariate                                      |
|---------------------------|--------|----------------|---------|------------|-----------|------------------------------------------------|
| Hepatitis                 | Male   | Post Neonatal  | 80 plus | Data Rich  | -1        | LDI (IS per capita)                            |
| Hepatitis                 | Male   | Post Neonatal  | 80 plus | Data Rich  | -1        | Sanitation (proportion with access)            |
| Hepatitis                 | Male   | Post Neonatal  | 80 plus | Data Rich  | -1        | Sociodemographic Status                        |
| Hepatitis                 | Male   | Post Neonatal  | 80 plus | Data Rich  | 1         | Hepatitis B (HBsAg) Seroprevalence (GBD 2015)  |
| Hepatitis                 | Male   | Post Neonatal  | 80 plus | Data Rich  | 1         | Hepatitis C (IgG) Seroprevalence (GBD 2015)    |
| Hepatitis                 | Male   | Post Neonatal  | 80 plus | Data Rich  | 1         | Log-transformed SEV scalar: Hep                |
| Hepatitis                 | Male   | Post Neonatal  | 80 plus | Data Rich  | 1         | Seroprevalence of anti-HAV (IgG)               |
| Hepatitis                 | Male   | Post Neonatal  | 80 plus | Data Rich  | 1         | Seroprevalence of anti-HEV (IgG)               |
| Hepatitis                 | Female | Post Neonatal  | 80 plus | Global     | -1        | Education (years per capita)                   |
| Hepatitis                 | Female | Post Neonatal  | 80 plus | Global     | -1        | Health System Access 2 (unitless)              |
| Hepatitis                 | Female | Post Neonatal  | 80 plus | Global     | -1        | Improved Water Source (proportion with access) |
| Hepatitis                 | Female | Post Neonatal  | 80 plus | Global     | -1        | LDI (IS per capita)                            |
| Hepatitis                 | Female | Post Neonatal  | 80 plus | Global     | -1        | Sanitation (proportion with access)            |
| Hepatitis                 | Female | Post Neonatal  | 80 plus | Global     | -1        | Sociodemographic Status                        |
| Hepatitis                 | Female | Post Neonatal  | 80 plus | Global     | 1         | Hepatitis B (HBsAg) Seroprevalence (GBD 2015)  |
| Hepatitis                 | Female | Post Neonatal  | 80 plus | Global     | 1         | Hepatitis C (IgG) Seroprevalence (GBD 2015)    |
| Hepatitis                 | Female | Post Neonatal  | 80 plus | Global     | 1         | Log-transformed SEV scalar: Hep                |
| Hepatitis                 | Female | Post Neonatal  | 80 plus | Global     | 1         | Seroprevalence of anti-HAV (IgG)               |
| Hepatitis                 | Female | Post Neonatal  | 80 plus | Global     | 1         | Seroprevalence of anti-HEV (IgG)               |
| Hepatitis                 | Female | Post Neonatal  | 80 plus | Data Rich  | -1        | Education (years per capita)                   |
| Hepatitis                 | Female | Post Neonatal  | 80 plus | Data Rich  | -1        | Health System Access 2 (unitless)              |
| Hepatitis                 | Female | Post Neonatal  | 80 plus | Data Rich  | -1        | Improved Water Source (proportion with access) |
| Hepatitis                 | Female | Post Neonatal  | 80 plus | Data Rich  | -1        | LDI (IS per capita)                            |
| Hepatitis                 | Female | Post Neonatal  | 80 plus | Data Rich  | -1        | Sanitation (proportion with access)            |
| Hepatitis                 | Female | Post Neonatal  | 80 plus | Data Rich  | -1        | Sociodemographic Status                        |
| Hepatitis                 | Female | Post Neonatal  | 80 plus | Data Rich  | 1         | Hepatitis B (HBsAg) Seroprevalence (GBD 2015)  |
| Hepatitis                 | Female | Post Neonatal  | 80 plus | Data Rich  | 1         | Hepatitis C (IgG) Seroprevalence (GBD 2015)    |
| Hepatitis                 | Female | Post Neonatal  | 80 plus | Data Rich  | 1         | Log-transformed SEV scalar: Hep                |
| Hepatitis                 | Female | Post Neonatal  | 80 plus | Data Rich  | 1         | Seroprevalence of anti-HAV (IgG)               |
| Hepatitis                 | Female | Post Neonatal  | 80 plus | Data Rich  | 1         | Seroprevalence of anti-HEV (IgG)               |
| Other infectious diseases | Male   | Early Neonatal | 80 plus | Global     | -1        | Antenatal Care (1 visit) Coverage (proportion) |
| Other infectious diseases | Male   | Early Neonatal | 80 plus | Global     | -1        | DTP3 Coverage (proportion)                     |
| Other infectious diseases | Male   | Early Neonatal | 80 plus | Global     | -1        | Improved Water Source (proportion with access) |
| Other infectious diseases | Male   | Early Neonatal | 80 plus | Global     | -1        | Latitude Over 45 (proportion)                  |
| Other infectious diseases | Male   | Early Neonatal | 80 plus | Global     | -1        | Sanitation (proportion with access)            |
| Other infectious diseases | Male   | Early Neonatal | 80 plus | Global     | -1        | Sociodemographic Status                        |
| Other infectious diseases | Male   | Early Neonatal | 80 plus | Global     | 0         | Latitude 15 to 30 (proportion)                 |
| Other infectious diseases | Male   | Early Neonatal | 80 plus | Global     | 0         | Latitude 30 to 45 (proportion)                 |
| Other infectious diseases | Male   | Early Neonatal | 80 plus | Global     | 1         | Latitude Under 15 (proportion)                 |
| Other infectious diseases | Male   | Early Neonatal | 80 plus | Global     | 1         | Malnutrition (proportion <2SD weight for age)  |
| Other infectious diseases | Male   | Early Neonatal | 80 plus | Data Rich  | -1        | Antenatal Care (1 visit) Coverage (proportion) |
| Other infectious diseases | Male   | Early Neonatal | 80 plus | Data Rich  | -1        | DTP3 Coverage (proportion)                     |
| Other infectious diseases | Male   | Early Neonatal | 80 plus | Data Rich  | -1        | Education (years per capita)                   |
| Other infectious diseases | Male   | Early Neonatal | 80 plus | Data Rich  | -1        | Health System Access (unitless)                |

**Appendix Table 10: CODEm covariates used, level of covariate, and expected direction of covariate by cause, sex, and age**

| Cause                     | Sex    | Age start      | Age end | Model type | Direction | Covariate                                      |
|---------------------------|--------|----------------|---------|------------|-----------|------------------------------------------------|
| Other infectious diseases | Male   | Early Neonatal | 80 plus | Data Rich  | -1        | Improved Water Source (proportion with access) |
| Other infectious diseases | Male   | Early Neonatal | 80 plus | Data Rich  | -1        | LDI (IS per capita)                            |
| Other infectious diseases | Male   | Early Neonatal | 80 plus | Data Rich  | -1        | Latitude Over 45 (proportion)                  |
| Other infectious diseases | Male   | Early Neonatal | 80 plus | Data Rich  | -1        | Measles Vaccine Coverage (proportion)          |
| Other infectious diseases | Male   | Early Neonatal | 80 plus | Data Rich  | -1        | Rainfall Quintile 1 (proportion)               |
| Other infectious diseases | Male   | Early Neonatal | 80 plus | Data Rich  | -1        | Sanitation (proportion with access)            |
| Other infectious diseases | Male   | Early Neonatal | 80 plus | Data Rich  | -1        | Sociodemographic Status                        |
| Other infectious diseases | Male   | Early Neonatal | 80 plus | Data Rich  | 0         | Latitude 15 to 30 (proportion)                 |
| Other infectious diseases | Male   | Early Neonatal | 80 plus | Data Rich  | 0         | Latitude 30 to 45 (proportion)                 |
| Other infectious diseases | Male   | Early Neonatal | 80 plus | Data Rich  | 0         | Rainfall Quintile 2 (proportion)               |
| Other infectious diseases | Male   | Early Neonatal | 80 plus | Data Rich  | 0         | Rainfall Quintile 3 (proportion)               |
| Other infectious diseases | Male   | Early Neonatal | 80 plus | Data Rich  | 0         | Rainfall Quintile 4 (proportion)               |
| Other infectious diseases | Male   | Early Neonatal | 80 plus | Data Rich  | 1         | Latitude Under 15 (proportion)                 |
| Other infectious diseases | Male   | Early Neonatal | 80 plus | Data Rich  | 1         | Malnutrition (proportion <2SD weight for age)  |
| Other infectious diseases | Male   | Early Neonatal | 80 plus | Data Rich  | 1         | Rainfall Quintile 5 (proportion)               |
| Other infectious diseases | Female | Early Neonatal | 80 plus | Global     | -1        | Antenatal Care (1 visit) Coverage (proportion) |
| Other infectious diseases | Female | Early Neonatal | 80 plus | Global     | -1        | DTP3 Coverage (proportion)                     |
| Other infectious diseases | Female | Early Neonatal | 80 plus | Global     | -1        | Improved Water Source (proportion with access) |
| Other infectious diseases | Female | Early Neonatal | 80 plus | Global     | -1        | Latitude Over 45 (proportion)                  |
| Other infectious diseases | Female | Early Neonatal | 80 plus | Global     | -1        | Sanitation (proportion with access)            |
| Other infectious diseases | Female | Early Neonatal | 80 plus | Global     | -1        | Sociodemographic Status                        |
| Other infectious diseases | Female | Early Neonatal | 80 plus | Global     | 0         | Latitude 15 to 30 (proportion)                 |
| Other infectious diseases | Female | Early Neonatal | 80 plus | Global     | 0         | Latitude 30 to 45 (proportion)                 |
| Other infectious diseases | Female | Early Neonatal | 80 plus | Global     | 1         | Latitude Under 15 (proportion)                 |
| Other infectious diseases | Female | Early Neonatal | 80 plus | Global     | 1         | Malnutrition (proportion <2SD weight for age)  |
| Other infectious diseases | Female | Early Neonatal | 80 plus | Data Rich  | -1        | Antenatal Care (1 visit) Coverage (proportion) |
| Other infectious diseases | Female | Early Neonatal | 80 plus | Data Rich  | -1        | DTP3 Coverage (proportion)                     |
| Other infectious diseases | Female | Early Neonatal | 80 plus | Data Rich  | -1        | Education (years per capita)                   |
| Other infectious diseases | Female | Early Neonatal | 80 plus | Data Rich  | -1        | Health System Access (unitless)                |
| Other infectious diseases | Female | Early Neonatal | 80 plus | Data Rich  | -1        | Improved Water Source (proportion with access) |
| Other infectious diseases | Female | Early Neonatal | 80 plus | Data Rich  | -1        | LDI (IS per capita)                            |
| Other infectious diseases | Female | Early Neonatal | 80 plus | Data Rich  | -1        | Latitude Over 45 (proportion)                  |
| Other infectious diseases | Female | Early Neonatal | 80 plus | Data Rich  | -1        | Measles Vaccine Coverage (proportion)          |
| Other infectious diseases | Female | Early Neonatal | 80 plus | Data Rich  | -1        | Rainfall Quintile 1 (proportion)               |
| Other infectious diseases | Female | Early Neonatal | 80 plus | Data Rich  | -1        | Sanitation (proportion with access)            |
| Other infectious diseases | Female | Early Neonatal | 80 plus | Data Rich  | -1        | Sociodemographic Status                        |
| Other infectious diseases | Female | Early Neonatal | 80 plus | Data Rich  | 0         | Latitude 15 to 30 (proportion)                 |
| Other infectious diseases | Female | Early Neonatal | 80 plus | Data Rich  | 0         | Latitude 30 to 45 (proportion)                 |
| Other infectious diseases | Female | Early Neonatal | 80 plus | Data Rich  | 0         | Rainfall Quintile 2 (proportion)               |
| Other infectious diseases | Female | Early Neonatal | 80 plus | Data Rich  | 0         | Rainfall Quintile 3 (proportion)               |
| Other infectious diseases | Female | Early Neonatal | 80 plus | Data Rich  | 0         | Rainfall Quintile 4 (proportion)               |
| Other infectious diseases | Female | Early Neonatal | 80 plus | Data Rich  | 1         | Latitude Under 15 (proportion)                 |
| Other infectious diseases | Female | Early Neonatal | 80 plus | Data Rich  | 1         | Malnutrition (proportion <2SD weight for age)  |
| Other infectious diseases | Female | Early Neonatal | 80 plus | Data Rich  | 1         | Rainfall Quintile 5 (proportion)               |

**Appendix Table 10: CODEm covariates used, level of covariate, and expected direction of covariate by cause, sex, and age**

| Cause                      | Sex    | Age start | Age end | Model type | Direction | Covariate                           |
|----------------------------|--------|-----------|---------|------------|-----------|-------------------------------------|
| Lip and oral cavity cancer | Male   | 15 to 19  | 80 plus | Global     | -1        | Education (years per capita)        |
| Lip and oral cavity cancer | Male   | 15 to 19  | 80 plus | Global     | -1        | Fruits (kcal per capita)            |
| Lip and oral cavity cancer | Male   | 15 to 19  | 80 plus | Global     | -1        | Health System Access 2 (unitless)   |
| Lip and oral cavity cancer | Male   | 15 to 19  | 80 plus | Global     | -1        | LDI (IS per capita)                 |
| Lip and oral cavity cancer | Male   | 15 to 19  | 80 plus | Global     | -1        | Vegetables (kcal per capita)        |
| Lip and oral cavity cancer | Male   | 15 to 19  | 80 plus | Global     | 0         | Sociodemographic Status             |
| Lip and oral cavity cancer | Male   | 15 to 19  | 80 plus | Global     | 1         | Alcohol (litres per capita)         |
| Lip and oral cavity cancer | Male   | 15 to 19  | 80 plus | Global     | 1         | Cumulative Cigarettes (10 Years)    |
| Lip and oral cavity cancer | Male   | 15 to 19  | 80 plus | Global     | 1         | Cumulative Cigarettes (20 Years)    |
| Lip and oral cavity cancer | Male   | 15 to 19  | 80 plus | Global     | 1         | Log-transformed SEV scalar: Mouth C |
| Lip and oral cavity cancer | Male   | 15 to 19  | 80 plus | Global     | 1         | Red Meat (kcal per capita)          |
| Lip and oral cavity cancer | Male   | 15 to 19  | 80 plus | Global     | 1         | Smoking Prevalence                  |
| Lip and oral cavity cancer | Male   | 15 to 19  | 80 plus | Data Rich  | -1        | Education (years per capita)        |
| Lip and oral cavity cancer | Male   | 15 to 19  | 80 plus | Data Rich  | -1        | Fruits (kcal per capita)            |
| Lip and oral cavity cancer | Male   | 15 to 19  | 80 plus | Data Rich  | -1        | Health System Access 2 (unitless)   |
| Lip and oral cavity cancer | Male   | 15 to 19  | 80 plus | Data Rich  | -1        | LDI (IS per capita)                 |
| Lip and oral cavity cancer | Male   | 15 to 19  | 80 plus | Data Rich  | -1        | Vegetables (kcal per capita)        |
| Lip and oral cavity cancer | Male   | 15 to 19  | 80 plus | Data Rich  | 0         | Sociodemographic Status             |
| Lip and oral cavity cancer | Male   | 15 to 19  | 80 plus | Data Rich  | 1         | Alcohol (litres per capita)         |
| Lip and oral cavity cancer | Male   | 15 to 19  | 80 plus | Data Rich  | 1         | Cumulative Cigarettes (10 Years)    |
| Lip and oral cavity cancer | Male   | 15 to 19  | 80 plus | Data Rich  | 1         | Cumulative Cigarettes (20 Years)    |
| Lip and oral cavity cancer | Male   | 15 to 19  | 80 plus | Data Rich  | 1         | Log-transformed SEV scalar: Mouth C |
| Lip and oral cavity cancer | Male   | 15 to 19  | 80 plus | Data Rich  | 1         | Red Meat (kcal per capita)          |
| Lip and oral cavity cancer | Male   | 15 to 19  | 80 plus | Data Rich  | 1         | Smoking Prevalence                  |
| Lip and oral cavity cancer | Female | 15 to 19  | 80 plus | Global     | -1        | Education (years per capita)        |
| Lip and oral cavity cancer | Female | 15 to 19  | 80 plus | Global     | -1        | Fruits (kcal per capita)            |
| Lip and oral cavity cancer | Female | 15 to 19  | 80 plus | Global     | -1        | Health System Access 2 (unitless)   |
| Lip and oral cavity cancer | Female | 15 to 19  | 80 plus | Global     | -1        | LDI (IS per capita)                 |
| Lip and oral cavity cancer | Female | 15 to 19  | 80 plus | Global     | -1        | Vegetables (kcal per capita)        |
| Lip and oral cavity cancer | Female | 15 to 19  | 80 plus | Global     | 0         | Sociodemographic Status             |
| Lip and oral cavity cancer | Female | 15 to 19  | 80 plus | Global     | 1         | Alcohol (litres per capita)         |
| Lip and oral cavity cancer | Female | 15 to 19  | 80 plus | Global     | 1         | Cumulative Cigarettes (10 Years)    |
| Lip and oral cavity cancer | Female | 15 to 19  | 80 plus | Global     | 1         | Cumulative Cigarettes (20 Years)    |
| Lip and oral cavity cancer | Female | 15 to 19  | 80 plus | Global     | 1         | Red Meat (kcal per capita)          |
| Lip and oral cavity cancer | Female | 15 to 19  | 80 plus | Global     | 1         | Smoking Prevalence                  |
| Lip and oral cavity cancer | Female | 15 to 19  | 80 plus | Data Rich  | -1        | Education (years per capita)        |
| Lip and oral cavity cancer | Female | 15 to 19  | 80 plus | Data Rich  | -1        | Fruits (kcal per capita)            |
| Lip and oral cavity cancer | Female | 15 to 19  | 80 plus | Data Rich  | -1        | Health System Access 2 (unitless)   |
| Lip and oral cavity cancer | Female | 15 to 19  | 80 plus | Data Rich  | -1        | LDI (IS per capita)                 |
| Lip and oral cavity cancer | Female | 15 to 19  | 80 plus | Data Rich  | -1        | Vegetables (kcal per capita)        |
| Lip and oral cavity cancer | Female | 15 to 19  | 80 plus | Data Rich  | 0         | Sociodemographic Status             |
| Lip and oral cavity cancer | Female | 15 to 19  | 80 plus | Data Rich  | 1         | Alcohol (litres per capita)         |
| Lip and oral cavity cancer | Female | 15 to 19  | 80 plus | Data Rich  | 1         | Cumulative Cigarettes (10 Years)    |
| Lip and oral cavity cancer | Female | 15 to 19  | 80 plus | Data Rich  | 1         | Cumulative Cigarettes (20 Years)    |

**Appendix Table 10: CODEm covariates used, level of covariate, and expected direction of covariate by cause, sex, and age**

| Cause                      | Sex    | Age start | Age end | Model type | Direction | Covariate                                           |
|----------------------------|--------|-----------|---------|------------|-----------|-----------------------------------------------------|
| Lip and oral cavity cancer | Female | 15 to 19  | 80 plus | Data Rich  | 1         | Red Meat (kcal per capita)                          |
| Lip and oral cavity cancer | Female | 15 to 19  | 80 plus | Data Rich  | 1         | Smoking Prevalence                                  |
| Nasopharynx cancer         | Male   | 5 to 9    | 80 plus | Global     | -1        | Education (years per capita)                        |
| Nasopharynx cancer         | Male   | 5 to 9    | 80 plus | Global     | -1        | Fruits (kcal per capita)                            |
| Nasopharynx cancer         | Male   | 5 to 9    | 80 plus | Global     | -1        | Health System Access 2 (unitless)                   |
| Nasopharynx cancer         | Male   | 5 to 9    | 80 plus | Global     | -1        | LDI (IS per capita)                                 |
| Nasopharynx cancer         | Male   | 5 to 9    | 80 plus | Global     | -1        | Vegetables (kcal per capita)                        |
| Nasopharynx cancer         | Male   | 5 to 9    | 80 plus | Global     | -1        | Whole Grains (kcal per capita)                      |
| Nasopharynx cancer         | Male   | 5 to 9    | 80 plus | Global     | 1         | Alcohol (litres per capita)                         |
| Nasopharynx cancer         | Male   | 5 to 9    | 80 plus | Global     | 1         | Log-transformed SEV scalar: Nasoph C                |
| Nasopharynx cancer         | Male   | 5 to 9    | 80 plus | Global     | 1         | Malnutrition (proportion <2SD weight for age)       |
| Nasopharynx cancer         | Male   | 5 to 9    | 80 plus | Global     | 1         | Population Density (over 1000 ppl/sqkm, proportion) |
| Nasopharynx cancer         | Male   | 5 to 9    | 80 plus | Global     | 1         | Population Density (under 150 ppl/sqkm, proportion) |
| Nasopharynx cancer         | Male   | 5 to 9    | 80 plus | Data Rich  | -1        | Education (years per capita)                        |
| Nasopharynx cancer         | Male   | 5 to 9    | 80 plus | Data Rich  | -1        | Fruits (kcal per capita)                            |
| Nasopharynx cancer         | Male   | 5 to 9    | 80 plus | Data Rich  | -1        | Health System Access 2 (unitless)                   |
| Nasopharynx cancer         | Male   | 5 to 9    | 80 plus | Data Rich  | -1        | LDI (IS per capita)                                 |
| Nasopharynx cancer         | Male   | 5 to 9    | 80 plus | Data Rich  | -1        | Vegetables (kcal per capita)                        |
| Nasopharynx cancer         | Male   | 5 to 9    | 80 plus | Data Rich  | -1        | Whole Grains (kcal per capita)                      |
| Nasopharynx cancer         | Male   | 5 to 9    | 80 plus | Data Rich  | 0         | Sociodemographic Status                             |
| Nasopharynx cancer         | Male   | 5 to 9    | 80 plus | Data Rich  | 1         | Alcohol (litres per capita)                         |
| Nasopharynx cancer         | Male   | 5 to 9    | 80 plus | Data Rich  | 1         | Log-transformed SEV scalar: Nasoph C                |
| Nasopharynx cancer         | Male   | 5 to 9    | 80 plus | Data Rich  | 1         | Malnutrition (proportion <2SD weight for age)       |
| Nasopharynx cancer         | Male   | 5 to 9    | 80 plus | Data Rich  | 1         | Population Density (over 1000 ppl/sqkm, proportion) |
| Nasopharynx cancer         | Male   | 5 to 9    | 80 plus | Data Rich  | 1         | Population Density (under 150 ppl/sqkm, proportion) |
| Nasopharynx cancer         | Female | 5 to 9    | 80 plus | Global     | -1        | Education (years per capita)                        |
| Nasopharynx cancer         | Female | 5 to 9    | 80 plus | Global     | -1        | Fruits (kcal per capita)                            |
| Nasopharynx cancer         | Female | 5 to 9    | 80 plus | Global     | -1        | Health System Access 2 (unitless)                   |
| Nasopharynx cancer         | Female | 5 to 9    | 80 plus | Global     | -1        | LDI (IS per capita)                                 |
| Nasopharynx cancer         | Female | 5 to 9    | 80 plus | Global     | -1        | Vegetables (kcal per capita)                        |
| Nasopharynx cancer         | Female | 5 to 9    | 80 plus | Global     | -1        | Whole Grains (kcal per capita)                      |
| Nasopharynx cancer         | Female | 5 to 9    | 80 plus | Global     | 0         | Sociodemographic Status                             |
| Nasopharynx cancer         | Female | 5 to 9    | 80 plus | Global     | 1         | Alcohol (litres per capita)                         |
| Nasopharynx cancer         | Female | 5 to 9    | 80 plus | Global     | 1         | Log-transformed SEV scalar: Nasoph C                |
| Nasopharynx cancer         | Female | 5 to 9    | 80 plus | Global     | 1         | Malnutrition (proportion <2SD weight for age)       |
| Nasopharynx cancer         | Female | 5 to 9    | 80 plus | Global     | 1         | Population Density (over 1000 ppl/sqkm, proportion) |
| Nasopharynx cancer         | Female | 5 to 9    | 80 plus | Global     | 1         | Population Density (under 150 ppl/sqkm, proportion) |
| Nasopharynx cancer         | Female | 5 to 9    | 80 plus | Data Rich  | -1        | Education (years per capita)                        |
| Nasopharynx cancer         | Female | 5 to 9    | 80 plus | Data Rich  | -1        | Fruits (kcal per capita)                            |
| Nasopharynx cancer         | Female | 5 to 9    | 80 plus | Data Rich  | -1        | Health System Access 2 (unitless)                   |
| Nasopharynx cancer         | Female | 5 to 9    | 80 plus | Data Rich  | -1        | LDI (IS per capita)                                 |
| Nasopharynx cancer         | Female | 5 to 9    | 80 plus | Data Rich  | -1        | Vegetables (kcal per capita)                        |
| Nasopharynx cancer         | Female | 5 to 9    | 80 plus | Data Rich  | -1        | Whole Grains (kcal per capita)                      |
| Nasopharynx cancer         | Female | 5 to 9    | 80 plus | Data Rich  | 0         | Sociodemographic Status                             |

**Appendix Table 10: CODEm covariates used, level of covariate, and expected direction of covariate by cause, sex, and age**

| Cause                | Sex    | Age start | Age end | Model type | Direction | Covariate                                           |
|----------------------|--------|-----------|---------|------------|-----------|-----------------------------------------------------|
| Nasopharynx cancer   | Female | 5 to 9    | 80 plus | Data Rich  | 1         | Alcohol (litres per capita)                         |
| Nasopharynx cancer   | Female | 5 to 9    | 80 plus | Data Rich  | 1         | Log-transformed SEV scalar: Nasoph C                |
| Nasopharynx cancer   | Female | 5 to 9    | 80 plus | Data Rich  | 1         | Malnutrition (proportion <2SD weight for age)       |
| Nasopharynx cancer   | Female | 5 to 9    | 80 plus | Data Rich  | 1         | Population Density (over 1000 ppl/sqkm, proportion) |
| Nasopharynx cancer   | Female | 5 to 9    | 80 plus | Data Rich  | 1         | Population Density (under 150 ppl/sqkm, proportion) |
| Other pharynx cancer | Male   | 15 to 19  | 80 plus | Global     | -1        | Education (years per capita)                        |
| Other pharynx cancer | Male   | 15 to 19  | 80 plus | Global     | -1        | Fruits (kcal per capita)                            |
| Other pharynx cancer | Male   | 15 to 19  | 80 plus | Global     | -1        | Health System Access (capped)                       |
| Other pharynx cancer | Male   | 15 to 19  | 80 plus | Global     | -1        | LDI (IS per capita)                                 |
| Other pharynx cancer | Male   | 15 to 19  | 80 plus | Global     | -1        | Vegetables (kcal per capita)                        |
| Other pharynx cancer | Male   | 15 to 19  | 80 plus | Global     | -1        | Whole Grains (kcal per capita)                      |
| Other pharynx cancer | Male   | 15 to 19  | 80 plus | Global     | 0         | Sociodemographic Status                             |
| Other pharynx cancer | Male   | 15 to 19  | 80 plus | Global     | 1         | Alcohol (litres per capita)                         |
| Other pharynx cancer | Male   | 15 to 19  | 80 plus | Global     | 1         | Cumulative Cigarettes (5 Years)                     |
| Other pharynx cancer | Male   | 15 to 19  | 80 plus | Global     | 1         | Log-transformed SEV scalar: Oth Phar C              |
| Other pharynx cancer | Male   | 15 to 19  | 80 plus | Global     | 1         | Malnutrition (proportion <2SD weight for age)       |
| Other pharynx cancer | Male   | 15 to 19  | 80 plus | Global     | 1         | Population Density (over 1000 ppl/sqkm, proportion) |
| Other pharynx cancer | Male   | 15 to 19  | 80 plus | Global     | 1         | Population Density (under 150 ppl/sqkm, proportion) |
| Other pharynx cancer | Male   | 15 to 19  | 80 plus | Global     | 1         | Smoking Prevalence                                  |
| Other pharynx cancer | Male   | 15 to 19  | 80 plus | Data Rich  | -1        | Education (years per capita)                        |
| Other pharynx cancer | Male   | 15 to 19  | 80 plus | Data Rich  | -1        | Fruits (kcal per capita)                            |
| Other pharynx cancer | Male   | 15 to 19  | 80 plus | Data Rich  | -1        | Health System Access (capped)                       |
| Other pharynx cancer | Male   | 15 to 19  | 80 plus | Data Rich  | -1        | LDI (IS per capita)                                 |
| Other pharynx cancer | Male   | 15 to 19  | 80 plus | Data Rich  | -1        | Vegetables (kcal per capita)                        |
| Other pharynx cancer | Male   | 15 to 19  | 80 plus | Data Rich  | -1        | Whole Grains (kcal per capita)                      |
| Other pharynx cancer | Male   | 15 to 19  | 80 plus | Data Rich  | 0         | Sociodemographic Status                             |
| Other pharynx cancer | Male   | 15 to 19  | 80 plus | Data Rich  | 1         | Alcohol (litres per capita)                         |
| Other pharynx cancer | Male   | 15 to 19  | 80 plus | Data Rich  | 1         | Cumulative Cigarettes (5 Years)                     |
| Other pharynx cancer | Male   | 15 to 19  | 80 plus | Data Rich  | 1         | Log-transformed SEV scalar: Oth Phar C              |
| Other pharynx cancer | Male   | 15 to 19  | 80 plus | Data Rich  | 1         | Malnutrition (proportion <2SD weight for age)       |
| Other pharynx cancer | Male   | 15 to 19  | 80 plus | Data Rich  | 1         | Population Density (over 1000 ppl/sqkm, proportion) |
| Other pharynx cancer | Male   | 15 to 19  | 80 plus | Data Rich  | 1         | Population Density (under 150 ppl/sqkm, proportion) |
| Other pharynx cancer | Male   | 15 to 19  | 80 plus | Data Rich  | 1         | Smoking Prevalence                                  |
| Other pharynx cancer | Female | 15 to 19  | 80 plus | Global     | -1        | Education (years per capita)                        |
| Other pharynx cancer | Female | 15 to 19  | 80 plus | Global     | -1        | Fruits (kcal per capita)                            |
| Other pharynx cancer | Female | 15 to 19  | 80 plus | Global     | -1        | Health System Access (capped)                       |
| Other pharynx cancer | Female | 15 to 19  | 80 plus | Global     | -1        | LDI (IS per capita)                                 |
| Other pharynx cancer | Female | 15 to 19  | 80 plus | Global     | -1        | Vegetables (kcal per capita)                        |
| Other pharynx cancer | Female | 15 to 19  | 80 plus | Global     | -1        | Whole Grains (kcal per capita)                      |
| Other pharynx cancer | Female | 15 to 19  | 80 plus | Global     | 0         | Sociodemographic Status                             |
| Other pharynx cancer | Female | 15 to 19  | 80 plus | Global     | 1         | Alcohol (litres per capita)                         |
| Other pharynx cancer | Female | 15 to 19  | 80 plus | Global     | 1         | Cumulative Cigarettes (5 Years)                     |
| Other pharynx cancer | Female | 15 to 19  | 80 plus | Global     | 1         | Log-transformed SEV scalar: Oth Phar C              |
| Other pharynx cancer | Female | 15 to 19  | 80 plus | Global     | 1         | Malnutrition (proportion <2SD weight for age)       |

**Appendix Table 10: CODEm covariates used, level of covariate, and expected direction of covariate by cause, sex, and age**

| Cause                | Sex    | Age start | Age end | Model type | Direction | Covariate                                           |
|----------------------|--------|-----------|---------|------------|-----------|-----------------------------------------------------|
| Other pharynx cancer | Female | 15 to 19  | 80 plus | Global     | 1         | Population Density (over 1000 ppl/sqkm, proportion) |
| Other pharynx cancer | Female | 15 to 19  | 80 plus | Global     | 1         | Population Density (under 150 ppl/sqkm, proportion) |
| Other pharynx cancer | Female | 15 to 19  | 80 plus | Global     | 1         | Smoking Prevalence                                  |
| Other pharynx cancer | Female | 15 to 19  | 80 plus | Data Rich  | -1        | Education (years per capita)                        |
| Other pharynx cancer | Female | 15 to 19  | 80 plus | Data Rich  | -1        | Fruits (kcal per capita)                            |
| Other pharynx cancer | Female | 15 to 19  | 80 plus | Data Rich  | -1        | Health System Access (capped)                       |
| Other pharynx cancer | Female | 15 to 19  | 80 plus | Data Rich  | -1        | LDI (IS per capita)                                 |
| Other pharynx cancer | Female | 15 to 19  | 80 plus | Data Rich  | -1        | Vegetables (kcal per capita)                        |
| Other pharynx cancer | Female | 15 to 19  | 80 plus | Data Rich  | -1        | Whole Grains (kcal per capita)                      |
| Other pharynx cancer | Female | 15 to 19  | 80 plus | Data Rich  | 0         | Sociodemographic Status                             |
| Other pharynx cancer | Female | 15 to 19  | 80 plus | Data Rich  | 1         | Alcohol (litres per capita)                         |
| Other pharynx cancer | Female | 15 to 19  | 80 plus | Data Rich  | 1         | Cumulative Cigarettes (5 Years)                     |
| Other pharynx cancer | Female | 15 to 19  | 80 plus | Data Rich  | 1         | Log-transformed SEV scalar: Oth Phar C              |
| Other pharynx cancer | Female | 15 to 19  | 80 plus | Data Rich  | 1         | Malnutrition (proportion <2SD weight for age)       |
| Other pharynx cancer | Female | 15 to 19  | 80 plus | Data Rich  | 1         | Population Density (over 1000 ppl/sqkm, proportion) |
| Other pharynx cancer | Female | 15 to 19  | 80 plus | Data Rich  | 1         | Population Density (under 150 ppl/sqkm, proportion) |
| Other pharynx cancer | Female | 15 to 19  | 80 plus | Data Rich  | 1         | Smoking Prevalence                                  |
| Esophageal cancer    | Male   | 15 to 19  | 80 plus | Global     | -1        | Education (years per capita)                        |
| Esophageal cancer    | Male   | 15 to 19  | 80 plus | Global     | -1        | Fruits (kcal per capita)                            |
| Esophageal cancer    | Male   | 15 to 19  | 80 plus | Global     | -1        | Improved Water Source (proportion with access)      |
| Esophageal cancer    | Male   | 15 to 19  | 80 plus | Global     | -1        | LDI (IS per capita)                                 |
| Esophageal cancer    | Male   | 15 to 19  | 80 plus | Global     | -1        | Sanitation (proportion with access)                 |
| Esophageal cancer    | Male   | 15 to 19  | 80 plus | Global     | -1        | Vegetables (kcal per capita)                        |
| Esophageal cancer    | Male   | 15 to 19  | 80 plus | Global     | 0         | Sociodemographic Status                             |
| Esophageal cancer    | Male   | 15 to 19  | 80 plus | Global     | 1         | Alcohol (litres per capita)                         |
| Esophageal cancer    | Male   | 15 to 19  | 80 plus | Global     | 1         | Indoor Air Pollution (All Cooking Fuels)            |
| Esophageal cancer    | Male   | 15 to 19  | 80 plus | Global     | 1         | Indoor Air Pollution (Biomass Cooking)              |
| Esophageal cancer    | Male   | 15 to 19  | 80 plus | Global     | 1         | Indoor Air Pollution (Coal Cooking)                 |
| Esophageal cancer    | Male   | 15 to 19  | 80 plus | Global     | 1         | Mean BMI                                            |
| Esophageal cancer    | Male   | 15 to 19  | 80 plus | Global     | 1         | Smoking Prevalence                                  |
| Esophageal cancer    | Male   | 15 to 19  | 80 plus | Global     | 1         | Tobacco (cigarettes per capita)                     |
| Esophageal cancer    | Male   | 15 to 19  | 80 plus | Data Rich  | -1        | Education (years per capita)                        |
| Esophageal cancer    | Male   | 15 to 19  | 80 plus | Data Rich  | -1        | Fruits (kcal per capita)                            |
| Esophageal cancer    | Male   | 15 to 19  | 80 plus | Data Rich  | -1        | Improved Water Source (proportion with access)      |
| Esophageal cancer    | Male   | 15 to 19  | 80 plus | Data Rich  | -1        | LDI (IS per capita)                                 |
| Esophageal cancer    | Male   | 15 to 19  | 80 plus | Data Rich  | -1        | Sanitation (proportion with access)                 |
| Esophageal cancer    | Male   | 15 to 19  | 80 plus | Data Rich  | -1        | Vegetables (kcal per capita)                        |
| Esophageal cancer    | Male   | 15 to 19  | 80 plus | Data Rich  | 0         | Sociodemographic Status                             |
| Esophageal cancer    | Male   | 15 to 19  | 80 plus | Data Rich  | 1         | Alcohol (litres per capita)                         |
| Esophageal cancer    | Male   | 15 to 19  | 80 plus | Data Rich  | 1         | Indoor Air Pollution (All Cooking Fuels)            |
| Esophageal cancer    | Male   | 15 to 19  | 80 plus | Data Rich  | 1         | Indoor Air Pollution (Biomass Cooking)              |
| Esophageal cancer    | Male   | 15 to 19  | 80 plus | Data Rich  | 1         | Indoor Air Pollution (Coal Cooking)                 |
| Esophageal cancer    | Male   | 15 to 19  | 80 plus | Data Rich  | 1         | Mean BMI                                            |
| Esophageal cancer    | Male   | 15 to 19  | 80 plus | Data Rich  | 1         | Smoking Prevalence                                  |

**Appendix Table 10: CODEm covariates used, level of covariate, and expected direction of covariate by cause, sex, and age**

| Cause             | Sex    | Age start | Age end | Model type | Direction | Covariate                                      |
|-------------------|--------|-----------|---------|------------|-----------|------------------------------------------------|
| Esophageal cancer | Male   | 15 to 19  | 80 plus | Data Rich  | 1         | Tobacco (cigarettes per capita)                |
| Esophageal cancer | Female | 15 to 19  | 80 plus | Global     | -1        | Education (years per capita)                   |
| Esophageal cancer | Female | 15 to 19  | 80 plus | Global     | -1        | Fruits (kcal per capita)                       |
| Esophageal cancer | Female | 15 to 19  | 80 plus | Global     | -1        | Improved Water Source (proportion with access) |
| Esophageal cancer | Female | 15 to 19  | 80 plus | Global     | -1        | LDI (IS per capita)                            |
| Esophageal cancer | Female | 15 to 19  | 80 plus | Global     | -1        | Sanitation (proportion with access)            |
| Esophageal cancer | Female | 15 to 19  | 80 plus | Global     | -1        | Vegetables (kcal per capita)                   |
| Esophageal cancer | Female | 15 to 19  | 80 plus | Global     | 0         | Sociodemographic Status                        |
| Esophageal cancer | Female | 15 to 19  | 80 plus | Global     | 1         | Alcohol (litres per capita)                    |
| Esophageal cancer | Female | 15 to 19  | 80 plus | Global     | 1         | Indoor Air Pollution (All Cooking Fuels)       |
| Esophageal cancer | Female | 15 to 19  | 80 plus | Global     | 1         | Indoor Air Pollution (Biomass Cooking)         |
| Esophageal cancer | Female | 15 to 19  | 80 plus | Global     | 1         | Indoor Air Pollution (Coal Cooking)            |
| Esophageal cancer | Female | 15 to 19  | 80 plus | Global     | 1         | Mean BMI                                       |
| Esophageal cancer | Female | 15 to 19  | 80 plus | Global     | 1         | Smoking Prevalence                             |
| Esophageal cancer | Female | 15 to 19  | 80 plus | Global     | 1         | Tobacco (cigarettes per capita)                |
| Esophageal cancer | Female | 15 to 19  | 80 plus | Data Rich  | -1        | Education (years per capita)                   |
| Esophageal cancer | Female | 15 to 19  | 80 plus | Data Rich  | -1        | Fruits (kcal per capita)                       |
| Esophageal cancer | Female | 15 to 19  | 80 plus | Data Rich  | -1        | Improved Water Source (proportion with access) |
| Esophageal cancer | Female | 15 to 19  | 80 plus | Data Rich  | -1        | LDI (IS per capita)                            |
| Esophageal cancer | Female | 15 to 19  | 80 plus | Data Rich  | -1        | Sanitation (proportion with access)            |
| Esophageal cancer | Female | 15 to 19  | 80 plus | Data Rich  | -1        | Vegetables (kcal per capita)                   |
| Esophageal cancer | Female | 15 to 19  | 80 plus | Data Rich  | 0         | Sociodemographic Status                        |
| Esophageal cancer | Female | 15 to 19  | 80 plus | Data Rich  | 1         | Alcohol (litres per capita)                    |
| Esophageal cancer | Female | 15 to 19  | 80 plus | Data Rich  | 1         | Indoor Air Pollution (All Cooking Fuels)       |
| Esophageal cancer | Female | 15 to 19  | 80 plus | Data Rich  | 1         | Indoor Air Pollution (Biomass Cooking)         |
| Esophageal cancer | Female | 15 to 19  | 80 plus | Data Rich  | 1         | Indoor Air Pollution (Coal Cooking)            |
| Esophageal cancer | Female | 15 to 19  | 80 plus | Data Rich  | 1         | Mean BMI                                       |
| Esophageal cancer | Female | 15 to 19  | 80 plus | Data Rich  | 1         | Smoking Prevalence                             |
| Esophageal cancer | Female | 15 to 19  | 80 plus | Data Rich  | 1         | Tobacco (cigarettes per capita)                |
| Stomach cancer    | Male   | 15 to 19  | 80 plus | Global     | -1        | Fruits (kcal per capita)                       |
| Stomach cancer    | Male   | 15 to 19  | 80 plus | Global     | -1        | Improved Water Source (proportion with access) |
| Stomach cancer    | Male   | 15 to 19  | 80 plus | Global     | -1        | LDI (IS per capita)                            |
| Stomach cancer    | Male   | 15 to 19  | 80 plus | Global     | -1        | Sanitation (proportion with access)            |
| Stomach cancer    | Male   | 15 to 19  | 80 plus | Global     | -1        | Vegetables (kcal per capita)                   |
| Stomach cancer    | Male   | 15 to 19  | 80 plus | Global     | 0         | Sociodemographic Status                        |
| Stomach cancer    | Male   | 15 to 19  | 80 plus | Global     | 1         | Alcohol (litres per capita)                    |
| Stomach cancer    | Male   | 15 to 19  | 80 plus | Global     | 1         | Cumulative Cigarettes (10 Years)               |
| Stomach cancer    | Male   | 15 to 19  | 80 plus | Global     | 1         | Cumulative Cigarettes (15 Years)               |
| Stomach cancer    | Male   | 15 to 19  | 80 plus | Global     | 1         | Indoor Air Pollution (All Cooking Fuels)       |
| Stomach cancer    | Male   | 15 to 19  | 80 plus | Global     | 1         | Indoor Air Pollution (Biomass Cooking)         |
| Stomach cancer    | Male   | 15 to 19  | 80 plus | Global     | 1         | Indoor Air Pollution (Coal Cooking)            |
| Stomach cancer    | Male   | 15 to 19  | 80 plus | Global     | 1         | Log-transformed SEV scalar: Stomach C          |
| Stomach cancer    | Male   | 15 to 19  | 80 plus | Global     | 1         | Mean BMI                                       |
| Stomach cancer    | Male   | 15 to 19  | 80 plus | Global     | 1         | Outdoor Air Pollution (PM2.5)                  |



**Appendix Table 10: CODEm covariates used, level of covariate, and expected direction of covariate by cause, sex, and age**

| Cause          | Sex    | Age start | Age end | Model type | Direction | Covariate                                      |
|----------------|--------|-----------|---------|------------|-----------|------------------------------------------------|
| Stomach cancer | Male   | 15 to 19  | 80 plus | Global     | 1         | Smoking Prevalence                             |
| Stomach cancer | Male   | 15 to 19  | 80 plus | Global     | 1         | Tobacco (cigarettes per capita)                |
| Stomach cancer | Male   | 15 to 19  | 80 plus | Data Rich  | -1        | Fruits (kcal per capita)                       |
| Stomach cancer | Male   | 15 to 19  | 80 plus | Data Rich  | -1        | Improved Water Source (proportion with access) |
| Stomach cancer | Male   | 15 to 19  | 80 plus | Data Rich  | -1        | LDI (IS per capita)                            |
| Stomach cancer | Male   | 15 to 19  | 80 plus | Data Rich  | -1        | Sanitation (proportion with access)            |
| Stomach cancer | Male   | 15 to 19  | 80 plus | Data Rich  | -1        | Vegetables (kcal per capita)                   |
| Stomach cancer | Male   | 15 to 19  | 80 plus | Data Rich  | 0         | Sociodemographic Status                        |
| Stomach cancer | Male   | 15 to 19  | 80 plus | Data Rich  | 1         | Alcohol (litres per capita)                    |
| Stomach cancer | Male   | 15 to 19  | 80 plus | Data Rich  | 1         | Cumulative Cigarettes (10 Years)               |
| Stomach cancer | Male   | 15 to 19  | 80 plus | Data Rich  | 1         | Cumulative Cigarettes (15 Years)               |
| Stomach cancer | Male   | 15 to 19  | 80 plus | Data Rich  | 1         | Indoor Air Pollution (All Cooking Fuels)       |
| Stomach cancer | Male   | 15 to 19  | 80 plus | Data Rich  | 1         | Indoor Air Pollution (Biomass Cooking)         |
| Stomach cancer | Male   | 15 to 19  | 80 plus | Data Rich  | 1         | Indoor Air Pollution (Coal Cooking)            |
| Stomach cancer | Male   | 15 to 19  | 80 plus | Data Rich  | 1         | Log-transformed SEV scalar: Stomach C          |
| Stomach cancer | Male   | 15 to 19  | 80 plus | Data Rich  | 1         | Mean BMI                                       |
| Stomach cancer | Male   | 15 to 19  | 80 plus | Data Rich  | 1         | Outdoor Air Pollution (PM2.5)                  |
| Stomach cancer | Male   | 15 to 19  | 80 plus | Data Rich  | 1         | Smoking Prevalence                             |
| Stomach cancer | Male   | 15 to 19  | 80 plus | Data Rich  | 1         | Tobacco (cigarettes per capita)                |
| Stomach cancer | Female | 15 to 19  | 80 plus | Global     | -1        | Education (years per capita)                   |
| Stomach cancer | Female | 15 to 19  | 80 plus | Global     | -1        | Fruits (kcal per capita)                       |
| Stomach cancer | Female | 15 to 19  | 80 plus | Global     | -1        | Improved Water Source (proportion with access) |
| Stomach cancer | Female | 15 to 19  | 80 plus | Global     | -1        | LDI (IS per capita)                            |
| Stomach cancer | Female | 15 to 19  | 80 plus | Global     | -1        | Sanitation (proportion with access)            |
| Stomach cancer | Female | 15 to 19  | 80 plus | Global     | -1        | Vegetables (kcal per capita)                   |
| Stomach cancer | Female | 15 to 19  | 80 plus | Global     | 0         | Sociodemographic Status                        |
| Stomach cancer | Female | 15 to 19  | 80 plus | Global     | 1         | Alcohol (litres per capita)                    |
| Stomach cancer | Female | 15 to 19  | 80 plus | Global     | 1         | Cumulative Cigarettes (10 Years)               |
| Stomach cancer | Female | 15 to 19  | 80 plus | Global     | 1         | Indoor Air Pollution (All Cooking Fuels)       |
| Stomach cancer | Female | 15 to 19  | 80 plus | Global     | 1         | Indoor Air Pollution (Biomass Cooking)         |
| Stomach cancer | Female | 15 to 19  | 80 plus | Global     | 1         | Indoor Air Pollution (Coal Cooking)            |
| Stomach cancer | Female | 15 to 19  | 80 plus | Global     | 1         | Log-transformed SEV scalar: Stomach C          |
| Stomach cancer | Female | 15 to 19  | 80 plus | Global     | 1         | Mean BMI                                       |
| Stomach cancer | Female | 15 to 19  | 80 plus | Global     | 1         | Outdoor Air Pollution (PM2.5)                  |
| Stomach cancer | Female | 15 to 19  | 80 plus | Global     | 1         | Smoking Prevalence                             |
| Stomach cancer | Female | 15 to 19  | 80 plus | Global     | 1         | Tobacco (cigarettes per capita)                |
| Stomach cancer | Female | 15 to 19  | 80 plus | Data Rich  | -1        | Education (years per capita)                   |
| Stomach cancer | Female | 15 to 19  | 80 plus | Data Rich  | -1        | Fruits (kcal per capita)                       |
| Stomach cancer | Female | 15 to 19  | 80 plus | Data Rich  | -1        | Improved Water Source (proportion with access) |
| Stomach cancer | Female | 15 to 19  | 80 plus | Data Rich  | -1        | LDI (IS per capita)                            |
| Stomach cancer | Female | 15 to 19  | 80 plus | Data Rich  | -1        | Sanitation (proportion with access)            |
| Stomach cancer | Female | 15 to 19  | 80 plus | Data Rich  | -1        | Vegetables (kcal per capita)                   |
| Stomach cancer | Female | 15 to 19  | 80 plus | Data Rich  | 0         | Sociodemographic Status                        |
| Stomach cancer | Female | 15 to 19  | 80 plus | Data Rich  | 1         | Alcohol (litres per capita)                    |

**Appendix Table 10: CODEm covariates used, level of covariate, and expected direction of covariate by cause, sex, and age**

| Cause                   | Sex    | Age start | Age end | Model type | Direction | Covariate                                         |
|-------------------------|--------|-----------|---------|------------|-----------|---------------------------------------------------|
| Stomach cancer          | Female | 15 to 19  | 80 plus | Data Rich  | 1         | Cumulative Cigarettes (10 Years)                  |
| Stomach cancer          | Female | 15 to 19  | 80 plus | Data Rich  | 1         | Indoor Air Pollution (All Cooking Fuels)          |
| Stomach cancer          | Female | 15 to 19  | 80 plus | Data Rich  | 1         | Indoor Air Pollution (Biomass Cooking)            |
| Stomach cancer          | Female | 15 to 19  | 80 plus | Data Rich  | 1         | Indoor Air Pollution (Coal Cooking)               |
| Stomach cancer          | Female | 15 to 19  | 80 plus | Data Rich  | 1         | Log-transformed SEV scalar: Stomach C             |
| Stomach cancer          | Female | 15 to 19  | 80 plus | Data Rich  | 1         | Mean BMI                                          |
| Stomach cancer          | Female | 15 to 19  | 80 plus | Data Rich  | 1         | Outdoor Air Pollution (PM2.5)                     |
| Stomach cancer          | Female | 15 to 19  | 80 plus | Data Rich  | 1         | Smoking Prevalence                                |
| Stomach cancer          | Female | 15 to 19  | 80 plus | Data Rich  | 1         | Tobacco (cigarettes per capita)                   |
| Colon and rectum cancer | Male   | 15 to 19  | 80 plus | Global     | -1        | Education (years per capita)                      |
| Colon and rectum cancer | Male   | 15 to 19  | 80 plus | Global     | -1        | Fruits (kcal per capita)                          |
| Colon and rectum cancer | Male   | 15 to 19  | 80 plus | Global     | -1        | Health System Access 2 (unitless)                 |
| Colon and rectum cancer | Male   | 15 to 19  | 80 plus | Global     | -1        | LDI (IS per capita)                               |
| Colon and rectum cancer | Male   | 15 to 19  | 80 plus | Global     | -1        | Nuts & Seeds (kcal per capita)                    |
| Colon and rectum cancer | Male   | 15 to 19  | 80 plus | Global     | -1        | PUFA Omega 3 - Seafood (kcal per capita)          |
| Colon and rectum cancer | Male   | 15 to 19  | 80 plus | Global     | -1        | Vegetables (kcal per capita)                      |
| Colon and rectum cancer | Male   | 15 to 19  | 80 plus | Global     | -1        | Whole Grains (kcal per capita)                    |
| Colon and rectum cancer | Male   | 15 to 19  | 80 plus | Global     | -1        | In-Milk (kcal per capita)                         |
| Colon and rectum cancer | Male   | 15 to 19  | 80 plus | Global     | 1         | Alcohol (litres per capita)                       |
| Colon and rectum cancer | Male   | 15 to 19  | 80 plus | Global     | 1         | Diabetes Age-Standardised Prevalence (proportion) |
| Colon and rectum cancer | Male   | 15 to 19  | 80 plus | Global     | 1         | Log-transformed SEV scalar: Colorect C            |
| Colon and rectum cancer | Male   | 15 to 19  | 80 plus | Global     | 1         | Mean BMI                                          |
| Colon and rectum cancer | Male   | 15 to 19  | 80 plus | Global     | 1         | Red Meat (kcal per capita)                        |
| Colon and rectum cancer | Male   | 15 to 19  | 80 plus | Global     | 1         | Smoking Prevalence                                |
| Colon and rectum cancer | Male   | 15 to 19  | 80 plus | Global     | 1         | Sociodemographic Status                           |
| Colon and rectum cancer | Male   | 15 to 19  | 80 plus | Global     | 1         | Tobacco (cigarettes per capita)                   |
| Colon and rectum cancer | Male   | 15 to 19  | 80 plus | Data Rich  | -1        | Education (years per capita)                      |
| Colon and rectum cancer | Male   | 15 to 19  | 80 plus | Data Rich  | -1        | Fruits (kcal per capita)                          |
| Colon and rectum cancer | Male   | 15 to 19  | 80 plus | Data Rich  | -1        | Health System Access 2 (unitless)                 |
| Colon and rectum cancer | Male   | 15 to 19  | 80 plus | Data Rich  | -1        | LDI (IS per capita)                               |
| Colon and rectum cancer | Male   | 15 to 19  | 80 plus | Data Rich  | -1        | Nuts & Seeds (kcal per capita)                    |
| Colon and rectum cancer | Male   | 15 to 19  | 80 plus | Data Rich  | -1        | PUFA Omega 3 - Seafood (kcal per capita)          |
| Colon and rectum cancer | Male   | 15 to 19  | 80 plus | Data Rich  | -1        | Vegetables (kcal per capita)                      |
| Colon and rectum cancer | Male   | 15 to 19  | 80 plus | Data Rich  | -1        | Whole Grains (kcal per capita)                    |
| Colon and rectum cancer | Male   | 15 to 19  | 80 plus | Data Rich  | -1        | In-Milk (kcal per capita)                         |
| Colon and rectum cancer | Male   | 15 to 19  | 80 plus | Data Rich  | 1         | Alcohol (litres per capita)                       |
| Colon and rectum cancer | Male   | 15 to 19  | 80 plus | Data Rich  | 1         | Diabetes Age-Standardised Prevalence (proportion) |
| Colon and rectum cancer | Male   | 15 to 19  | 80 plus | Data Rich  | 1         | Log-transformed SEV scalar: Colorect C            |
| Colon and rectum cancer | Male   | 15 to 19  | 80 plus | Data Rich  | 1         | Mean BMI                                          |
| Colon and rectum cancer | Male   | 15 to 19  | 80 plus | Data Rich  | 1         | Red Meat (kcal per capita)                        |
| Colon and rectum cancer | Male   | 15 to 19  | 80 plus | Data Rich  | 1         | Smoking Prevalence                                |
| Colon and rectum cancer | Male   | 15 to 19  | 80 plus | Data Rich  | 1         | Sociodemographic Status                           |
| Colon and rectum cancer | Male   | 15 to 19  | 80 plus | Data Rich  | 1         | Tobacco (cigarettes per capita)                   |
| Colon and rectum cancer | Female | 15 to 19  | 80 plus | Global     | -1        | Education (years per capita)                      |

**Appendix Table 10: CODEm covariates used, level of covariate, and expected direction of covariate by cause, sex, and age**

| Cause                   | Sex    | Age start | Age end | Model type | Direction | Covariate                                         |
|-------------------------|--------|-----------|---------|------------|-----------|---------------------------------------------------|
| Colon and rectum cancer | Female | 15 to 19  | 80 plus | Global     | -1        | Fruits (kcal per capita)                          |
| Colon and rectum cancer | Female | 15 to 19  | 80 plus | Global     | -1        | Health System Access 2 (unitless)                 |
| Colon and rectum cancer | Female | 15 to 19  | 80 plus | Global     | -1        | LDI (I\$ per capita)                              |
| Colon and rectum cancer | Female | 15 to 19  | 80 plus | Global     | -1        | Nuts & Seeds (kcal per capita)                    |
| Colon and rectum cancer | Female | 15 to 19  | 80 plus | Global     | -1        | PUFA Omega 3 - Seafood (kcal per capita)          |
| Colon and rectum cancer | Female | 15 to 19  | 80 plus | Global     | -1        | Vegetables (kcal per capita)                      |
| Colon and rectum cancer | Female | 15 to 19  | 80 plus | Global     | -1        | Whole Grains (kcal per capita)                    |
| Colon and rectum cancer | Female | 15 to 19  | 80 plus | Global     | -1        | In-Milk (kcal per capita)                         |
| Colon and rectum cancer | Female | 15 to 19  | 80 plus | Global     | 1         | Alcohol (litres per capita)                       |
| Colon and rectum cancer | Female | 15 to 19  | 80 plus | Global     | 1         | Diabetes Age-Standardised Prevalence (proportion) |
| Colon and rectum cancer | Female | 15 to 19  | 80 plus | Global     | 1         | Log-transformed SEV scalar: Colorect C            |
| Colon and rectum cancer | Female | 15 to 19  | 80 plus | Global     | 1         | Mean BMI                                          |
| Colon and rectum cancer | Female | 15 to 19  | 80 plus | Global     | 1         | Red Meat (kcal per capita)                        |
| Colon and rectum cancer | Female | 15 to 19  | 80 plus | Global     | 1         | Smoking Prevalence                                |
| Colon and rectum cancer | Female | 15 to 19  | 80 plus | Global     | 1         | Sociodemographic Status                           |
| Colon and rectum cancer | Female | 15 to 19  | 80 plus | Global     | 1         | Tobacco (cigarettes per capita)                   |
| Colon and rectum cancer | Female | 15 to 19  | 80 plus | Data Rich  | -1        | Education (years per capita)                      |
| Colon and rectum cancer | Female | 15 to 19  | 80 plus | Data Rich  | -1        | Fruits (kcal per capita)                          |
| Colon and rectum cancer | Female | 15 to 19  | 80 plus | Data Rich  | -1        | Health System Access 2 (unitless)                 |
| Colon and rectum cancer | Female | 15 to 19  | 80 plus | Data Rich  | -1        | LDI (I\$ per capita)                              |
| Colon and rectum cancer | Female | 15 to 19  | 80 plus | Data Rich  | -1        | Nuts & Seeds (kcal per capita)                    |
| Colon and rectum cancer | Female | 15 to 19  | 80 plus | Data Rich  | -1        | PUFA Omega 3 - Seafood (kcal per capita)          |
| Colon and rectum cancer | Female | 15 to 19  | 80 plus | Data Rich  | -1        | Vegetables (kcal per capita)                      |
| Colon and rectum cancer | Female | 15 to 19  | 80 plus | Data Rich  | -1        | Whole Grains (kcal per capita)                    |
| Colon and rectum cancer | Female | 15 to 19  | 80 plus | Data Rich  | -1        | In-Milk (kcal per capita)                         |
| Colon and rectum cancer | Female | 15 to 19  | 80 plus | Data Rich  | 1         | Alcohol (litres per capita)                       |
| Colon and rectum cancer | Female | 15 to 19  | 80 plus | Data Rich  | 1         | Diabetes Age-Standardised Prevalence (proportion) |
| Colon and rectum cancer | Female | 15 to 19  | 80 plus | Data Rich  | 1         | Log-transformed SEV scalar: Colorect C            |
| Colon and rectum cancer | Female | 15 to 19  | 80 plus | Data Rich  | 1         | Mean BMI                                          |
| Colon and rectum cancer | Female | 15 to 19  | 80 plus | Data Rich  | 1         | Red Meat (kcal per capita)                        |
| Colon and rectum cancer | Female | 15 to 19  | 80 plus | Data Rich  | 1         | Smoking Prevalence                                |
| Colon and rectum cancer | Female | 15 to 19  | 80 plus | Data Rich  | 1         | Sociodemographic Status                           |
| Colon and rectum cancer | Female | 15 to 19  | 80 plus | Data Rich  | 1         | Tobacco (cigarettes per capita)                   |
| Liver cancer            | Male   | 5 to 9    | 80 plus | Global     | -1        | Education (years per capita)                      |
| Liver cancer            | Male   | 5 to 9    | 80 plus | Global     | -1        | Health System Access 2 (unitless)                 |
| Liver cancer            | Male   | 5 to 9    | 80 plus | Global     | -1        | LDI (I\$ per capita)                              |
| Liver cancer            | Male   | 5 to 9    | 80 plus | Global     | 0         | Sociodemographic Status                           |
| Liver cancer            | Male   | 5 to 9    | 80 plus | Global     | 1         | Alcohol (litres per capita)                       |
| Liver cancer            | Male   | 5 to 9    | 80 plus | Global     | 1         | Animal Fats (kcal per capita)                     |
| Liver cancer            | Male   | 5 to 9    | 80 plus | Global     | 1         | Cumulative Cigarettes (15 Years)                  |
| Liver cancer            | Male   | 5 to 9    | 80 plus | Global     | 1         | Cumulative Cigarettes (20 Years)                  |
| Liver cancer            | Male   | 5 to 9    | 80 plus | Global     | 1         | Diabetes Age-Standardised Prevalence (proportion) |
| Liver cancer            | Male   | 5 to 9    | 80 plus | Global     | 1         | Hepatitis B Prevalence (proportion)               |
| Liver cancer            | Male   | 5 to 9    | 80 plus | Global     | 1         | Hepatitis C Prevalence (proportion)               |

**Appendix Table 10: CODEm covariates used, level of covariate, and expected direction of covariate by cause, sex, and age**

| Cause        | Sex    | Age start | Age end | Model type | Direction | Covariate                                         |
|--------------|--------|-----------|---------|------------|-----------|---------------------------------------------------|
| Liver cancer | Male   | 5 to 9    | 80 plus | Global     | 1         | Log-transformed SEV scalar: Liver C               |
| Liver cancer | Male   | 5 to 9    | 80 plus | Global     | 1         | Mean BMI                                          |
| Liver cancer | Male   | 5 to 9    | 80 plus | Global     | 1         | Red Meat (kcal per capita)                        |
| Liver cancer | Male   | 5 to 9    | 80 plus | Global     | 1         | Tobacco (cigarettes per capita)                   |
| Liver cancer | Male   | 5 to 9    | 80 plus | Data Rich  | -1        | Education (years per capita)                      |
| Liver cancer | Male   | 5 to 9    | 80 plus | Data Rich  | -1        | Health System Access 2 (unitless)                 |
| Liver cancer | Male   | 5 to 9    | 80 plus | Data Rich  | -1        | LDI (IS per capita)                               |
| Liver cancer | Male   | 5 to 9    | 80 plus | Data Rich  | 0         | Sociodemographic Status                           |
| Liver cancer | Male   | 5 to 9    | 80 plus | Data Rich  | 1         | Alcohol (litres per capita)                       |
| Liver cancer | Male   | 5 to 9    | 80 plus | Data Rich  | 1         | Animal Fats (kcal per capita)                     |
| Liver cancer | Male   | 5 to 9    | 80 plus | Data Rich  | 1         | Cumulative Cigarettes (15 Years)                  |
| Liver cancer | Male   | 5 to 9    | 80 plus | Data Rich  | 1         | Cumulative Cigarettes (20 Years)                  |
| Liver cancer | Male   | 5 to 9    | 80 plus | Data Rich  | 1         | Diabetes Age-Standardised Prevalence (proportion) |
| Liver cancer | Male   | 5 to 9    | 80 plus | Data Rich  | 1         | Hepatitis B Prevalence (proportion)               |
| Liver cancer | Male   | 5 to 9    | 80 plus | Data Rich  | 1         | Hepatitis C Prevalence (proportion)               |
| Liver cancer | Male   | 5 to 9    | 80 plus | Data Rich  | 1         | Log-transformed SEV scalar: Liver C               |
| Liver cancer | Male   | 5 to 9    | 80 plus | Data Rich  | 1         | Mean BMI                                          |
| Liver cancer | Male   | 5 to 9    | 80 plus | Data Rich  | 1         | Red Meat (kcal per capita)                        |
| Liver cancer | Male   | 5 to 9    | 80 plus | Data Rich  | 1         | Tobacco (cigarettes per capita)                   |
| Liver cancer | Female | 5 to 9    | 80 plus | Global     | -1        | Education (years per capita)                      |
| Liver cancer | Female | 5 to 9    | 80 plus | Global     | -1        | Health System Access 2 (unitless)                 |
| Liver cancer | Female | 5 to 9    | 80 plus | Global     | -1        | LDI (IS per capita)                               |
| Liver cancer | Female | 5 to 9    | 80 plus | Global     | 0         | Sociodemographic Status                           |
| Liver cancer | Female | 5 to 9    | 80 plus | Global     | 1         | Alcohol (litres per capita)                       |
| Liver cancer | Female | 5 to 9    | 80 plus | Global     | 1         | Animal Fats (kcal per capita)                     |
| Liver cancer | Female | 5 to 9    | 80 plus | Global     | 1         | Cumulative Cigarettes (15 Years)                  |
| Liver cancer | Female | 5 to 9    | 80 plus | Global     | 1         | Cumulative Cigarettes (20 Years)                  |
| Liver cancer | Female | 5 to 9    | 80 plus | Global     | 1         | Diabetes Age-Standardised Prevalence (proportion) |
| Liver cancer | Female | 5 to 9    | 80 plus | Global     | 1         | Hepatitis B Prevalence (proportion)               |
| Liver cancer | Female | 5 to 9    | 80 plus | Global     | 1         | Hepatitis C Prevalence (proportion)               |
| Liver cancer | Female | 5 to 9    | 80 plus | Global     | 1         | Log-transformed SEV scalar: Liver C               |
| Liver cancer | Female | 5 to 9    | 80 plus | Global     | 1         | Mean BMI                                          |
| Liver cancer | Female | 5 to 9    | 80 plus | Global     | 1         | Red Meat (kcal per capita)                        |
| Liver cancer | Female | 5 to 9    | 80 plus | Global     | 1         | Tobacco (cigarettes per capita)                   |
| Liver cancer | Female | 5 to 9    | 80 plus | Data Rich  | -1        | Education (years per capita)                      |
| Liver cancer | Female | 5 to 9    | 80 plus | Data Rich  | -1        | Health System Access 2 (unitless)                 |
| Liver cancer | Female | 5 to 9    | 80 plus | Data Rich  | -1        | LDI (IS per capita)                               |
| Liver cancer | Female | 5 to 9    | 80 plus | Data Rich  | 0         | Sociodemographic Status                           |
| Liver cancer | Female | 5 to 9    | 80 plus | Data Rich  | 1         | Alcohol (litres per capita)                       |
| Liver cancer | Female | 5 to 9    | 80 plus | Data Rich  | 1         | Animal Fats (kcal per capita)                     |
| Liver cancer | Female | 5 to 9    | 80 plus | Data Rich  | 1         | Cumulative Cigarettes (15 Years)                  |
| Liver cancer | Female | 5 to 9    | 80 plus | Data Rich  | 1         | Cumulative Cigarettes (20 Years)                  |
| Liver cancer | Female | 5 to 9    | 80 plus | Data Rich  | 1         | Diabetes Age-Standardised Prevalence (proportion) |
| Liver cancer | Female | 5 to 9    | 80 plus | Data Rich  | 1         | Hepatitis B Prevalence (proportion)               |

**Appendix Table 10: CODEm covariates used, level of covariate, and expected direction of covariate by cause, sex, and age**

| Cause                                | Sex    | Age start | Age end | Model type | Direction | Covariate                                         |
|--------------------------------------|--------|-----------|---------|------------|-----------|---------------------------------------------------|
| Liver cancer                         | Female | 5 to 9    | 80 plus | Data Rich  | 1         | Hepatitis C Prevalence (proportion)               |
| Liver cancer                         | Female | 5 to 9    | 80 plus | Data Rich  | 1         | Log-transformed SEV scalar: Liver C               |
| Liver cancer                         | Female | 5 to 9    | 80 plus | Data Rich  | 1         | Mean BMI                                          |
| Liver cancer                         | Female | 5 to 9    | 80 plus | Data Rich  | 1         | Red Meat (kcal per capita)                        |
| Liver cancer                         | Female | 5 to 9    | 80 plus | Data Rich  | 1         | Tobacco (cigarettes per capita)                   |
| Gallbladder and biliary tract cancer | Male   | 15 to 19  | 80 plus | Global     | -1        | Education (years per capita)                      |
| Gallbladder and biliary tract cancer | Male   | 15 to 19  | 80 plus | Global     | -1        | Fruits (kcal per capita)                          |
| Gallbladder and biliary tract cancer | Male   | 15 to 19  | 80 plus | Global     | -1        | Health System Access (capped)                     |
| Gallbladder and biliary tract cancer | Male   | 15 to 19  | 80 plus | Global     | -1        | LDI (IS per capita)                               |
| Gallbladder and biliary tract cancer | Male   | 15 to 19  | 80 plus | Global     | -1        | Vegetables (kcal per capita)                      |
| Gallbladder and biliary tract cancer | Male   | 15 to 19  | 80 plus | Global     | 0         | Sociodemographic Status                           |
| Gallbladder and biliary tract cancer | Male   | 15 to 19  | 80 plus | Global     | 1         | Alcohol (litres per capita)                       |
| Gallbladder and biliary tract cancer | Male   | 15 to 19  | 80 plus | Global     | 1         | Cumulative Cigarettes (10 Years)                  |
| Gallbladder and biliary tract cancer | Male   | 15 to 19  | 80 plus | Global     | 1         | Cumulative Cigarettes (5 Years)                   |
| Gallbladder and biliary tract cancer | Male   | 15 to 19  | 80 plus | Global     | 1         | Diabetes Age-Standardised Prevalence (proportion) |
| Gallbladder and biliary tract cancer | Male   | 15 to 19  | 80 plus | Global     | 1         | Log-transformed SEV scalar: Gallblad C            |
| Gallbladder and biliary tract cancer | Male   | 15 to 19  | 80 plus | Global     | 1         | Mean BMI                                          |
| Gallbladder and biliary tract cancer | Male   | 15 to 19  | 80 plus | Global     | 1         | Smoking Prevalence                                |
| Gallbladder and biliary tract cancer | Male   | 15 to 19  | 80 plus | Global     | 1         | Tobacco (cigarettes per capita)                   |
| Gallbladder and biliary tract cancer | Male   | 15 to 19  | 80 plus | Global     | 1         | Total Calories (kcal per capita)                  |
| Gallbladder and biliary tract cancer | Male   | 15 to 19  | 80 plus | Data Rich  | -1        | Education (years per capita)                      |
| Gallbladder and biliary tract cancer | Male   | 15 to 19  | 80 plus | Data Rich  | -1        | Fruits (kcal per capita)                          |
| Gallbladder and biliary tract cancer | Male   | 15 to 19  | 80 plus | Data Rich  | -1        | Health System Access (capped)                     |
| Gallbladder and biliary tract cancer | Male   | 15 to 19  | 80 plus | Data Rich  | -1        | LDI (IS per capita)                               |
| Gallbladder and biliary tract cancer | Male   | 15 to 19  | 80 plus | Data Rich  | -1        | Vegetables (kcal per capita)                      |
| Gallbladder and biliary tract cancer | Male   | 15 to 19  | 80 plus | Data Rich  | 0         | Sociodemographic Status                           |
| Gallbladder and biliary tract cancer | Male   | 15 to 19  | 80 plus | Data Rich  | 1         | Alcohol (litres per capita)                       |
| Gallbladder and biliary tract cancer | Male   | 15 to 19  | 80 plus | Data Rich  | 1         | Cumulative Cigarettes (10 Years)                  |
| Gallbladder and biliary tract cancer | Male   | 15 to 19  | 80 plus | Data Rich  | 1         | Cumulative Cigarettes (5 Years)                   |
| Gallbladder and biliary tract cancer | Male   | 15 to 19  | 80 plus | Data Rich  | 1         | Diabetes Age-Standardised Prevalence (proportion) |
| Gallbladder and biliary tract cancer | Male   | 15 to 19  | 80 plus | Data Rich  | 1         | Log-transformed SEV scalar: Gallblad C            |
| Gallbladder and biliary tract cancer | Male   | 15 to 19  | 80 plus | Data Rich  | 1         | Mean BMI                                          |
| Gallbladder and biliary tract cancer | Male   | 15 to 19  | 80 plus | Data Rich  | 1         | Smoking Prevalence                                |
| Gallbladder and biliary tract cancer | Male   | 15 to 19  | 80 plus | Data Rich  | 1         | Tobacco (cigarettes per capita)                   |
| Gallbladder and biliary tract cancer | Male   | 15 to 19  | 80 plus | Data Rich  | 1         | Total Calories (kcal per capita)                  |
| Gallbladder and biliary tract cancer | Female | 15 to 19  | 80 plus | Global     | -1        | Education (years per capita)                      |
| Gallbladder and biliary tract cancer | Female | 15 to 19  | 80 plus | Global     | -1        | Fruits (kcal per capita)                          |
| Gallbladder and biliary tract cancer | Female | 15 to 19  | 80 plus | Global     | -1        | Health System Access (capped)                     |
| Gallbladder and biliary tract cancer | Female | 15 to 19  | 80 plus | Global     | -1        | LDI (IS per capita)                               |
| Gallbladder and biliary tract cancer | Female | 15 to 19  | 80 plus | Global     | -1        | Vegetables (kcal per capita)                      |
| Gallbladder and biliary tract cancer | Female | 15 to 19  | 80 plus | Global     | 0         | Sociodemographic Status                           |
| Gallbladder and biliary tract cancer | Female | 15 to 19  | 80 plus | Global     | 1         | Alcohol (litres per capita)                       |
| Gallbladder and biliary tract cancer | Female | 15 to 19  | 80 plus | Global     | 1         | Cumulative Cigarettes (10 Years)                  |
| Gallbladder and biliary tract cancer | Female | 15 to 19  | 80 plus | Global     | 1         | Cumulative Cigarettes (5 Years)                   |

**Appendix Table 10: CODEm covariates used, level of covariate, and expected direction of covariate by cause, sex, and age**

| Cause                                | Sex    | Age start | Age end | Model type | Direction | Covariate                                         |
|--------------------------------------|--------|-----------|---------|------------|-----------|---------------------------------------------------|
| Gallbladder and biliary tract cancer | Female | 15 to 19  | 80 plus | Global     | 1         | Diabetes Age-Standardised Prevalence (proportion) |
| Gallbladder and biliary tract cancer | Female | 15 to 19  | 80 plus | Global     | 1         | Log-transformed SEV scalar: Gallblad C            |
| Gallbladder and biliary tract cancer | Female | 15 to 19  | 80 plus | Global     | 1         | Mean BMI                                          |
| Gallbladder and biliary tract cancer | Female | 15 to 19  | 80 plus | Global     | 1         | Smoking Prevalence                                |
| Gallbladder and biliary tract cancer | Female | 15 to 19  | 80 plus | Global     | 1         | Tobacco (cigarettes per capita)                   |
| Gallbladder and biliary tract cancer | Female | 15 to 19  | 80 plus | Global     | 1         | Total Calories (kcal per capita)                  |
| Gallbladder and biliary tract cancer | Female | 15 to 19  | 80 plus | Data Rich  | -1        | Education (years per capita)                      |
| Gallbladder and biliary tract cancer | Female | 15 to 19  | 80 plus | Data Rich  | -1        | Fruits (kcal per capita)                          |
| Gallbladder and biliary tract cancer | Female | 15 to 19  | 80 plus | Data Rich  | -1        | Health System Access (capped)                     |
| Gallbladder and biliary tract cancer | Female | 15 to 19  | 80 plus | Data Rich  | -1        | LDI (IS per capita)                               |
| Gallbladder and biliary tract cancer | Female | 15 to 19  | 80 plus | Data Rich  | -1        | Vegetables (kcal per capita)                      |
| Gallbladder and biliary tract cancer | Female | 15 to 19  | 80 plus | Data Rich  | 0         | Sociodemographic Status                           |
| Gallbladder and biliary tract cancer | Female | 15 to 19  | 80 plus | Data Rich  | 1         | Alcohol (litres per capita)                       |
| Gallbladder and biliary tract cancer | Female | 15 to 19  | 80 plus | Data Rich  | 1         | Cumulative Cigarettes (10 Years)                  |
| Gallbladder and biliary tract cancer | Female | 15 to 19  | 80 plus | Data Rich  | 1         | Cumulative Cigarettes (5 Years)                   |
| Gallbladder and biliary tract cancer | Female | 15 to 19  | 80 plus | Data Rich  | 1         | Diabetes Age-Standardised Prevalence (proportion) |
| Gallbladder and biliary tract cancer | Female | 15 to 19  | 80 plus | Data Rich  | 1         | Log-transformed SEV scalar: Gallblad C            |
| Gallbladder and biliary tract cancer | Female | 15 to 19  | 80 plus | Data Rich  | 1         | Mean BMI                                          |
| Gallbladder and biliary tract cancer | Female | 15 to 19  | 80 plus | Data Rich  | 1         | Smoking Prevalence                                |
| Gallbladder and biliary tract cancer | Female | 15 to 19  | 80 plus | Data Rich  | 1         | Tobacco (cigarettes per capita)                   |
| Gallbladder and biliary tract cancer | Female | 15 to 19  | 80 plus | Data Rich  | 1         | Total Calories (kcal per capita)                  |
| Pancreatic cancer                    | Male   | 15 to 19  | 80 plus | Global     | -1        | Education (years per capita)                      |
| Pancreatic cancer                    | Male   | 15 to 19  | 80 plus | Global     | -1        | Fruits (kcal per capita)                          |
| Pancreatic cancer                    | Male   | 15 to 19  | 80 plus | Global     | -1        | Health System Access (unitless)                   |
| Pancreatic cancer                    | Male   | 15 to 19  | 80 plus | Global     | -1        | LDI (IS per capita)                               |
| Pancreatic cancer                    | Male   | 15 to 19  | 80 plus | Global     | -1        | Vegetables (kcal per capita)                      |
| Pancreatic cancer                    | Male   | 15 to 19  | 80 plus | Global     | 1         | Alcohol (litres per capita)                       |
| Pancreatic cancer                    | Male   | 15 to 19  | 80 plus | Global     | 1         | Animal Fats (kcal per capita)                     |
| Pancreatic cancer                    | Male   | 15 to 19  | 80 plus | Global     | 1         | Cumulative Cigarettes (10 Years)                  |
| Pancreatic cancer                    | Male   | 15 to 19  | 80 plus | Global     | 1         | Cumulative Cigarettes (20 Years)                  |
| Pancreatic cancer                    | Male   | 15 to 19  | 80 plus | Global     | 1         | Cumulative Cigarettes (5 Years)                   |
| Pancreatic cancer                    | Male   | 15 to 19  | 80 plus | Global     | 1         | Diabetes Age-Standardised Prevalence (proportion) |
| Pancreatic cancer                    | Male   | 15 to 19  | 80 plus | Global     | 1         | Log-transformed SEV scalar: Pancreas C            |
| Pancreatic cancer                    | Male   | 15 to 19  | 80 plus | Global     | 1         | Mean BMI                                          |
| Pancreatic cancer                    | Male   | 15 to 19  | 80 plus | Global     | 1         | Red Meat (kcal per capita)                        |
| Pancreatic cancer                    | Male   | 15 to 19  | 80 plus | Global     | 1         | Smoking Prevalence                                |
| Pancreatic cancer                    | Male   | 15 to 19  | 80 plus | Global     | 1         | Sociodemographic Status                           |
| Pancreatic cancer                    | Male   | 15 to 19  | 80 plus | Global     | 1         | Tobacco (cigarettes per capita)                   |
| Pancreatic cancer                    | Male   | 15 to 19  | 80 plus | Global     | 1         | Total Calories (kcal per capita)                  |
| Pancreatic cancer                    | Male   | 15 to 19  | 80 plus | Data Rich  | -1        | Education (years per capita)                      |
| Pancreatic cancer                    | Male   | 15 to 19  | 80 plus | Data Rich  | -1        | Fruits (kcal per capita)                          |
| Pancreatic cancer                    | Male   | 15 to 19  | 80 plus | Data Rich  | -1        | Health System Access (unitless)                   |
| Pancreatic cancer                    | Male   | 15 to 19  | 80 plus | Data Rich  | -1        | LDI (IS per capita)                               |
| Pancreatic cancer                    | Male   | 15 to 19  | 80 plus | Data Rich  | -1        | Vegetables (kcal per capita)                      |

**Appendix Table 10: CODEm covariates used, level of covariate, and expected direction of covariate by cause, sex, and age**

| Cause             | Sex    | Age start | Age end | Model type | Direction | Covariate                                         |
|-------------------|--------|-----------|---------|------------|-----------|---------------------------------------------------|
| Pancreatic cancer | Male   | 15 to 19  | 80 plus | Data Rich  | 1         | Alcohol (litres per capita)                       |
| Pancreatic cancer | Male   | 15 to 19  | 80 plus | Data Rich  | 1         | Animal Fats (kcal per capita)                     |
| Pancreatic cancer | Male   | 15 to 19  | 80 plus | Data Rich  | 1         | Cumulative Cigarettes (10 Years)                  |
| Pancreatic cancer | Male   | 15 to 19  | 80 plus | Data Rich  | 1         | Cumulative Cigarettes (20 Years)                  |
| Pancreatic cancer | Male   | 15 to 19  | 80 plus | Data Rich  | 1         | Cumulative Cigarettes (5 Years)                   |
| Pancreatic cancer | Male   | 15 to 19  | 80 plus | Data Rich  | 1         | Diabetes Age-Standardised Prevalence (proportion) |
| Pancreatic cancer | Male   | 15 to 19  | 80 plus | Data Rich  | 1         | Log-transformed SEV scalar: Pancreas C            |
| Pancreatic cancer | Male   | 15 to 19  | 80 plus | Data Rich  | 1         | Mean BMI                                          |
| Pancreatic cancer | Male   | 15 to 19  | 80 plus | Data Rich  | 1         | Red Meat (kcal per capita)                        |
| Pancreatic cancer | Male   | 15 to 19  | 80 plus | Data Rich  | 1         | Smoking Prevalence                                |
| Pancreatic cancer | Male   | 15 to 19  | 80 plus | Data Rich  | 1         | Sociodemographic Status                           |
| Pancreatic cancer | Male   | 15 to 19  | 80 plus | Data Rich  | 1         | Tobacco (cigarettes per capita)                   |
| Pancreatic cancer | Male   | 15 to 19  | 80 plus | Data Rich  | 1         | Total Calories (kcal per capita)                  |
| Pancreatic cancer | Female | 15 to 19  | 80 plus | Global     | -1        | Education (years per capita)                      |
| Pancreatic cancer | Female | 15 to 19  | 80 plus | Global     | -1        | Fruits (kcal per capita)                          |
| Pancreatic cancer | Female | 15 to 19  | 80 plus | Global     | -1        | Health System Access (unitless)                   |
| Pancreatic cancer | Female | 15 to 19  | 80 plus | Global     | -1        | LDI (IS per capita)                               |
| Pancreatic cancer | Female | 15 to 19  | 80 plus | Global     | -1        | Vegetables (kcal per capita)                      |
| Pancreatic cancer | Female | 15 to 19  | 80 plus | Global     | 1         | Alcohol (litres per capita)                       |
| Pancreatic cancer | Female | 15 to 19  | 80 plus | Global     | 1         | Animal Fats (kcal per capita)                     |
| Pancreatic cancer | Female | 15 to 19  | 80 plus | Global     | 1         | Cumulative Cigarettes (10 Years)                  |
| Pancreatic cancer | Female | 15 to 19  | 80 plus | Global     | 1         | Cumulative Cigarettes (20 Years)                  |
| Pancreatic cancer | Female | 15 to 19  | 80 plus | Global     | 1         | Cumulative Cigarettes (5 Years)                   |
| Pancreatic cancer | Female | 15 to 19  | 80 plus | Global     | 1         | Diabetes Age-Standardised Prevalence (proportion) |
| Pancreatic cancer | Female | 15 to 19  | 80 plus | Global     | 1         | Log-transformed SEV scalar: Pancreas C            |
| Pancreatic cancer | Female | 15 to 19  | 80 plus | Global     | 1         | Mean BMI                                          |
| Pancreatic cancer | Female | 15 to 19  | 80 plus | Global     | 1         | Red Meat (kcal per capita)                        |
| Pancreatic cancer | Female | 15 to 19  | 80 plus | Global     | 1         | Smoking Prevalence                                |
| Pancreatic cancer | Female | 15 to 19  | 80 plus | Global     | 1         | Sociodemographic Status                           |
| Pancreatic cancer | Female | 15 to 19  | 80 plus | Global     | 1         | Tobacco (cigarettes per capita)                   |
| Pancreatic cancer | Female | 15 to 19  | 80 plus | Global     | 1         | Total Calories (kcal per capita)                  |
| Pancreatic cancer | Female | 15 to 19  | 80 plus | Data Rich  | -1        | Education (years per capita)                      |
| Pancreatic cancer | Female | 15 to 19  | 80 plus | Data Rich  | -1        | Fruits (kcal per capita)                          |
| Pancreatic cancer | Female | 15 to 19  | 80 plus | Data Rich  | -1        | Health System Access (unitless)                   |
| Pancreatic cancer | Female | 15 to 19  | 80 plus | Data Rich  | -1        | LDI (IS per capita)                               |
| Pancreatic cancer | Female | 15 to 19  | 80 plus | Data Rich  | -1        | Vegetables (kcal per capita)                      |
| Pancreatic cancer | Female | 15 to 19  | 80 plus | Data Rich  | 1         | Alcohol (litres per capita)                       |
| Pancreatic cancer | Female | 15 to 19  | 80 plus | Data Rich  | 1         | Animal Fats (kcal per capita)                     |
| Pancreatic cancer | Female | 15 to 19  | 80 plus | Data Rich  | 1         | Cumulative Cigarettes (10 Years)                  |
| Pancreatic cancer | Female | 15 to 19  | 80 plus | Data Rich  | 1         | Cumulative Cigarettes (20 Years)                  |
| Pancreatic cancer | Female | 15 to 19  | 80 plus | Data Rich  | 1         | Cumulative Cigarettes (5 Years)                   |
| Pancreatic cancer | Female | 15 to 19  | 80 plus | Data Rich  | 1         | Diabetes Age-Standardised Prevalence (proportion) |
| Pancreatic cancer | Female | 15 to 19  | 80 plus | Data Rich  | 1         | Log-transformed SEV scalar: Pancreas C            |
| Pancreatic cancer | Female | 15 to 19  | 80 plus | Data Rich  | 1         | Mean BMI                                          |

**Appendix Table 10: CODEm covariates used, level of covariate, and expected direction of covariate by cause, sex, and age**

| Cause             | Sex    | Age start | Age end | Model type | Direction | Covariate                                           |
|-------------------|--------|-----------|---------|------------|-----------|-----------------------------------------------------|
| Pancreatic cancer | Female | 15 to 19  | 80 plus | Data Rich  | 1         | Red Meat (kcal per capita)                          |
| Pancreatic cancer | Female | 15 to 19  | 80 plus | Data Rich  | 1         | Smoking Prevalence                                  |
| Pancreatic cancer | Female | 15 to 19  | 80 plus | Data Rich  | 1         | Sociodemographic Status                             |
| Pancreatic cancer | Female | 15 to 19  | 80 plus | Data Rich  | 1         | Tobacco (cigarettes per capita)                     |
| Pancreatic cancer | Female | 15 to 19  | 80 plus | Data Rich  | 1         | Total Calories (kcal per capita)                    |
| Larynx cancer     | Male   | 15 to 19  | 80 plus | Global     | -1        | Education (years per capita)                        |
| Larynx cancer     | Male   | 15 to 19  | 80 plus | Global     | -1        | Fruits (kcal per capita)                            |
| Larynx cancer     | Male   | 15 to 19  | 80 plus | Global     | -1        | LDI (IS per capita)                                 |
| Larynx cancer     | Male   | 15 to 19  | 80 plus | Global     | -1        | Vegetables (kcal per capita)                        |
| Larynx cancer     | Male   | 15 to 19  | 80 plus | Global     | 0         | Sociodemographic Status                             |
| Larynx cancer     | Male   | 15 to 19  | 80 plus | Global     | 1         | Alcohol (litres per capita)                         |
| Larynx cancer     | Male   | 15 to 19  | 80 plus | Global     | 1         | Cumulative Cigarettes (10 Years)                    |
| Larynx cancer     | Male   | 15 to 19  | 80 plus | Global     | 1         | Cumulative Cigarettes (15 Years)                    |
| Larynx cancer     | Male   | 15 to 19  | 80 plus | Global     | 1         | Cumulative Cigarettes (20 Years)                    |
| Larynx cancer     | Male   | 15 to 19  | 80 plus | Global     | 1         | Cumulative Cigarettes (5 Years)                     |
| Larynx cancer     | Male   | 15 to 19  | 80 plus | Global     | 1         | Log-transformed SEV scalar: Larynx C                |
| Larynx cancer     | Male   | 15 to 19  | 80 plus | Global     | 1         | Population Density (over 1000 ppl/sqkm, proportion) |
| Larynx cancer     | Male   | 15 to 19  | 80 plus | Global     | 1         | Population Density (under 150 ppl/sqkm, proportion) |
| Larynx cancer     | Male   | 15 to 19  | 80 plus | Global     | 1         | Smoking Prevalence                                  |
| Larynx cancer     | Male   | 15 to 19  | 80 plus | Global     | 1         | Tobacco (cigarettes per capita)                     |
| Larynx cancer     | Male   | 15 to 19  | 80 plus | Data Rich  | -1        | Education (years per capita)                        |
| Larynx cancer     | Male   | 15 to 19  | 80 plus | Data Rich  | -1        | Fruits (kcal per capita)                            |
| Larynx cancer     | Male   | 15 to 19  | 80 plus | Data Rich  | -1        | LDI (IS per capita)                                 |
| Larynx cancer     | Male   | 15 to 19  | 80 plus | Data Rich  | -1        | Vegetables (kcal per capita)                        |
| Larynx cancer     | Male   | 15 to 19  | 80 plus | Data Rich  | 0         | Sociodemographic Status                             |
| Larynx cancer     | Male   | 15 to 19  | 80 plus | Data Rich  | 1         | Alcohol (litres per capita)                         |
| Larynx cancer     | Male   | 15 to 19  | 80 plus | Data Rich  | 1         | Cumulative Cigarettes (10 Years)                    |
| Larynx cancer     | Male   | 15 to 19  | 80 plus | Data Rich  | 1         | Cumulative Cigarettes (15 Years)                    |
| Larynx cancer     | Male   | 15 to 19  | 80 plus | Data Rich  | 1         | Cumulative Cigarettes (20 Years)                    |
| Larynx cancer     | Male   | 15 to 19  | 80 plus | Data Rich  | 1         | Cumulative Cigarettes (5 Years)                     |
| Larynx cancer     | Male   | 15 to 19  | 80 plus | Data Rich  | 1         | Log-transformed SEV scalar: Larynx C                |
| Larynx cancer     | Male   | 15 to 19  | 80 plus | Data Rich  | 1         | Population Density (over 1000 ppl/sqkm, proportion) |
| Larynx cancer     | Male   | 15 to 19  | 80 plus | Data Rich  | 1         | Population Density (under 150 ppl/sqkm, proportion) |
| Larynx cancer     | Male   | 15 to 19  | 80 plus | Data Rich  | 1         | Smoking Prevalence                                  |
| Larynx cancer     | Male   | 15 to 19  | 80 plus | Data Rich  | 1         | Tobacco (cigarettes per capita)                     |
| Larynx cancer     | Female | 15 to 19  | 80 plus | Global     | -1        | Education (years per capita)                        |
| Larynx cancer     | Female | 15 to 19  | 80 plus | Global     | -1        | Fruits (kcal per capita)                            |
| Larynx cancer     | Female | 15 to 19  | 80 plus | Global     | -1        | LDI (IS per capita)                                 |
| Larynx cancer     | Female | 15 to 19  | 80 plus | Global     | -1        | Vegetables (kcal per capita)                        |
| Larynx cancer     | Female | 15 to 19  | 80 plus | Global     | 0         | Sociodemographic Status                             |
| Larynx cancer     | Female | 15 to 19  | 80 plus | Global     | 1         | Alcohol (litres per capita)                         |
| Larynx cancer     | Female | 15 to 19  | 80 plus | Global     | 1         | Cumulative Cigarettes (10 Years)                    |
| Larynx cancer     | Female | 15 to 19  | 80 plus | Global     | 1         | Cumulative Cigarettes (15 Years)                    |
| Larynx cancer     | Female | 15 to 19  | 80 plus | Global     | 1         | Cumulative Cigarettes (20 Years)                    |



**Appendix Table 10: CODEm covariates used, level of covariate, and expected direction of covariate by cause, sex, and age**

| Cause                               | Sex    | Age start | Age end | Model type | Direction | Covariate                                           |
|-------------------------------------|--------|-----------|---------|------------|-----------|-----------------------------------------------------|
| Larynx cancer                       | Female | 15 to 19  | 80 plus | Global     | 1         | Cumulative Cigarettes (5 Years)                     |
| Larynx cancer                       | Female | 15 to 19  | 80 plus | Global     | 1         | Log-transformed SEV scalar: Larynx C                |
| Larynx cancer                       | Female | 15 to 19  | 80 plus | Global     | 1         | Population Density (over 1000 ppl/sqkm, proportion) |
| Larynx cancer                       | Female | 15 to 19  | 80 plus | Global     | 1         | Population Density (under 150 ppl/sqkm, proportion) |
| Larynx cancer                       | Female | 15 to 19  | 80 plus | Global     | 1         | Smoking Prevalence                                  |
| Larynx cancer                       | Female | 15 to 19  | 80 plus | Global     | 1         | Tobacco (cigarettes per capita)                     |
| Larynx cancer                       | Female | 15 to 19  | 80 plus | Data Rich  | -1        | Education (years per capita)                        |
| Larynx cancer                       | Female | 15 to 19  | 80 plus | Data Rich  | -1        | Fruits (kcal per capita)                            |
| Larynx cancer                       | Female | 15 to 19  | 80 plus | Data Rich  | -1        | LDI (IS per capita)                                 |
| Larynx cancer                       | Female | 15 to 19  | 80 plus | Data Rich  | -1        | Vegetables (kcal per capita)                        |
| Larynx cancer                       | Female | 15 to 19  | 80 plus | Data Rich  | 0         | Sociodemographic Status                             |
| Larynx cancer                       | Female | 15 to 19  | 80 plus | Data Rich  | 1         | Alcohol (litres per capita)                         |
| Larynx cancer                       | Female | 15 to 19  | 80 plus | Data Rich  | 1         | Cumulative Cigarettes (10 Years)                    |
| Larynx cancer                       | Female | 15 to 19  | 80 plus | Data Rich  | 1         | Cumulative Cigarettes (15 Years)                    |
| Larynx cancer                       | Female | 15 to 19  | 80 plus | Data Rich  | 1         | Cumulative Cigarettes (20 Years)                    |
| Larynx cancer                       | Female | 15 to 19  | 80 plus | Data Rich  | 1         | Cumulative Cigarettes (5 Years)                     |
| Larynx cancer                       | Female | 15 to 19  | 80 plus | Data Rich  | 1         | Log-transformed SEV scalar: Larynx C                |
| Larynx cancer                       | Female | 15 to 19  | 80 plus | Data Rich  | 1         | Population Density (over 1000 ppl/sqkm, proportion) |
| Larynx cancer                       | Female | 15 to 19  | 80 plus | Data Rich  | 1         | Population Density (under 150 ppl/sqkm, proportion) |
| Larynx cancer                       | Female | 15 to 19  | 80 plus | Data Rich  | 1         | Smoking Prevalence                                  |
| Larynx cancer                       | Female | 15 to 19  | 80 plus | Data Rich  | 1         | Tobacco (cigarettes per capita)                     |
| Tracheal, bronchus, and lung cancer | Male   | 15 to 19  | 80 plus | Global     | -1        | Education (years per capita)                        |
| Tracheal, bronchus, and lung cancer | Male   | 15 to 19  | 80 plus | Global     | -1        | LDI (IS per capita)                                 |
| Tracheal, bronchus, and lung cancer | Male   | 15 to 19  | 80 plus | Global     | 0         | Sociodemographic Status                             |
| Tracheal, bronchus, and lung cancer | Male   | 15 to 19  | 80 plus | Global     | 1         | Cumulative Cigarettes (10 Years)                    |
| Tracheal, bronchus, and lung cancer | Male   | 15 to 19  | 80 plus | Global     | 1         | Cumulative Cigarettes (15 Years)                    |
| Tracheal, bronchus, and lung cancer | Male   | 15 to 19  | 80 plus | Global     | 1         | Cumulative Cigarettes (20 Years)                    |
| Tracheal, bronchus, and lung cancer | Male   | 15 to 19  | 80 plus | Global     | 1         | Cumulative Cigarettes (5 Years)                     |
| Tracheal, bronchus, and lung cancer | Male   | 15 to 19  | 80 plus | Global     | 1         | Indoor Air Pollution (All Cooking Fuels)            |
| Tracheal, bronchus, and lung cancer | Male   | 15 to 19  | 80 plus | Global     | 1         | Outdoor Air Pollution (PM2.5)                       |
| Tracheal, bronchus, and lung cancer | Male   | 15 to 19  | 80 plus | Global     | 1         | Smoking Prevalence                                  |
| Tracheal, bronchus, and lung cancer | Male   | 15 to 19  | 80 plus | Global     | 1         | Tobacco (cigarettes per capita)                     |
| Tracheal, bronchus, and lung cancer | Male   | 15 to 19  | 80 plus | Data Rich  | -1        | Education (years per capita)                        |
| Tracheal, bronchus, and lung cancer | Male   | 15 to 19  | 80 plus | Data Rich  | -1        | LDI (IS per capita)                                 |
| Tracheal, bronchus, and lung cancer | Male   | 15 to 19  | 80 plus | Data Rich  | 0         | Sociodemographic Status                             |
| Tracheal, bronchus, and lung cancer | Male   | 15 to 19  | 80 plus | Data Rich  | 1         | Cumulative Cigarettes (10 Years)                    |
| Tracheal, bronchus, and lung cancer | Male   | 15 to 19  | 80 plus | Data Rich  | 1         | Cumulative Cigarettes (15 Years)                    |
| Tracheal, bronchus, and lung cancer | Male   | 15 to 19  | 80 plus | Data Rich  | 1         | Cumulative Cigarettes (20 Years)                    |
| Tracheal, bronchus, and lung cancer | Male   | 15 to 19  | 80 plus | Data Rich  | 1         | Cumulative Cigarettes (5 Years)                     |
| Tracheal, bronchus, and lung cancer | Male   | 15 to 19  | 80 plus | Data Rich  | 1         | Indoor Air Pollution (All Cooking Fuels)            |
| Tracheal, bronchus, and lung cancer | Male   | 15 to 19  | 80 plus | Data Rich  | 1         | Outdoor Air Pollution (PM2.5)                       |
| Tracheal, bronchus, and lung cancer | Male   | 15 to 19  | 80 plus | Data Rich  | 1         | Smoking Prevalence                                  |
| Tracheal, bronchus, and lung cancer | Male   | 15 to 19  | 80 plus | Data Rich  | 1         | Tobacco (cigarettes per capita)                     |
| Tracheal, bronchus, and lung cancer | Female | 15 to 19  | 80 plus | Global     | -1        | Education (years per capita)                        |

**Appendix Table 10: CODEm covariates used, level of covariate, and expected direction of covariate by cause, sex, and age**

| Cause                               | Sex    | Age start | Age end | Model type | Direction | Covariate                                |
|-------------------------------------|--------|-----------|---------|------------|-----------|------------------------------------------|
| Tracheal, bronchus, and lung cancer | Female | 15 to 19  | 80 plus | Global     | -1        | LDI (IS per capita)                      |
| Tracheal, bronchus, and lung cancer | Female | 15 to 19  | 80 plus | Global     | 0         | Sociodemographic Status                  |
| Tracheal, bronchus, and lung cancer | Female | 15 to 19  | 80 plus | Global     | 1         | Cumulative Cigarettes (10 Years)         |
| Tracheal, bronchus, and lung cancer | Female | 15 to 19  | 80 plus | Global     | 1         | Cumulative Cigarettes (15 Years)         |
| Tracheal, bronchus, and lung cancer | Female | 15 to 19  | 80 plus | Global     | 1         | Cumulative Cigarettes (20 Years)         |
| Tracheal, bronchus, and lung cancer | Female | 15 to 19  | 80 plus | Global     | 1         | Cumulative Cigarettes (5 Years)          |
| Tracheal, bronchus, and lung cancer | Female | 15 to 19  | 80 plus | Global     | 1         | Indoor Air Pollution (All Cooking Fuels) |
| Tracheal, bronchus, and lung cancer | Female | 15 to 19  | 80 plus | Global     | 1         | Outdoor Air Pollution (PM2.5)            |
| Tracheal, bronchus, and lung cancer | Female | 15 to 19  | 80 plus | Global     | 1         | Smoking Prevalence                       |
| Tracheal, bronchus, and lung cancer | Female | 15 to 19  | 80 plus | Global     | 1         | Tobacco (cigarettes per capita)          |
| Tracheal, bronchus, and lung cancer | Female | 15 to 19  | 80 plus | Data Rich  | -1        | Education (years per capita)             |
| Tracheal, bronchus, and lung cancer | Female | 15 to 19  | 80 plus | Data Rich  | -1        | LDI (IS per capita)                      |
| Tracheal, bronchus, and lung cancer | Female | 15 to 19  | 80 plus | Data Rich  | 0         | Sociodemographic Status                  |
| Tracheal, bronchus, and lung cancer | Female | 15 to 19  | 80 plus | Data Rich  | 1         | Cumulative Cigarettes (10 Years)         |
| Tracheal, bronchus, and lung cancer | Female | 15 to 19  | 80 plus | Data Rich  | 1         | Cumulative Cigarettes (15 Years)         |
| Tracheal, bronchus, and lung cancer | Female | 15 to 19  | 80 plus | Data Rich  | 1         | Cumulative Cigarettes (20 Years)         |
| Tracheal, bronchus, and lung cancer | Female | 15 to 19  | 80 plus | Data Rich  | 1         | Cumulative Cigarettes (5 Years)          |
| Tracheal, bronchus, and lung cancer | Female | 15 to 19  | 80 plus | Data Rich  | 1         | Indoor Air Pollution (All Cooking Fuels) |
| Tracheal, bronchus, and lung cancer | Female | 15 to 19  | 80 plus | Data Rich  | 1         | Outdoor Air Pollution (PM2.5)            |
| Tracheal, bronchus, and lung cancer | Female | 15 to 19  | 80 plus | Data Rich  | 1         | Smoking Prevalence                       |
| Tracheal, bronchus, and lung cancer | Female | 15 to 19  | 80 plus | Data Rich  | 1         | Tobacco (cigarettes per capita)          |
| Malignant skin melanoma             | Male   | 15 to 19  | 80 plus | Global     | -1        | Education (years per capita)             |
| Malignant skin melanoma             | Male   | 15 to 19  | 80 plus | Global     | -1        | Fruits (kcal per capita)                 |
| Malignant skin melanoma             | Male   | 15 to 19  | 80 plus | Global     | -1        | LDI (IS per capita)                      |
| Malignant skin melanoma             | Male   | 15 to 19  | 80 plus | Global     | -1        | Latitude 30 to 45 (proportion)           |
| Malignant skin melanoma             | Male   | 15 to 19  | 80 plus | Global     | -1        | Latitude Over 45 (proportion)            |
| Malignant skin melanoma             | Male   | 15 to 19  | 80 plus | Global     | -1        | Vegetables (kcal per capita)             |
| Malignant skin melanoma             | Male   | 15 to 19  | 80 plus | Global     | 0         | Latitude 15 to 30 (proportion)           |
| Malignant skin melanoma             | Male   | 15 to 19  | 80 plus | Global     | 0         | Sociodemographic Status                  |
| Malignant skin melanoma             | Male   | 15 to 19  | 80 plus | Global     | 1         | Alcohol (litres per capita)              |
| Malignant skin melanoma             | Male   | 15 to 19  | 80 plus | Global     | 1         | Animal Fats (kcal per capita)            |
| Malignant skin melanoma             | Male   | 15 to 19  | 80 plus | Global     | 1         | Cumulative Cigarettes (20 Years)         |
| Malignant skin melanoma             | Male   | 15 to 19  | 80 plus | Global     | 1         | Mean BMI                                 |
| Malignant skin melanoma             | Male   | 15 to 19  | 80 plus | Global     | 1         | Smoking Prevalence                       |
| Malignant skin melanoma             | Male   | 15 to 19  | 80 plus | Global     | 1         | Tobacco (cigarettes per capita)          |
| Malignant skin melanoma             | Male   | 15 to 19  | 80 plus | Data Rich  | -1        | Education (years per capita)             |
| Malignant skin melanoma             | Male   | 15 to 19  | 80 plus | Data Rich  | -1        | Fruits (kcal per capita)                 |
| Malignant skin melanoma             | Male   | 15 to 19  | 80 plus | Data Rich  | -1        | LDI (IS per capita)                      |
| Malignant skin melanoma             | Male   | 15 to 19  | 80 plus | Data Rich  | -1        | Latitude 30 to 45 (proportion)           |
| Malignant skin melanoma             | Male   | 15 to 19  | 80 plus | Data Rich  | -1        | Latitude Over 45 (proportion)            |
| Malignant skin melanoma             | Male   | 15 to 19  | 80 plus | Data Rich  | -1        | Vegetables (kcal per capita)             |
| Malignant skin melanoma             | Male   | 15 to 19  | 80 plus | Data Rich  | 0         | Latitude 15 to 30 (proportion)           |
| Malignant skin melanoma             | Male   | 15 to 19  | 80 plus | Data Rich  | 0         | Sociodemographic Status                  |
| Malignant skin melanoma             | Male   | 15 to 19  | 80 plus | Data Rich  | 1         | Alcohol (litres per capita)              |

**Appendix Table 10: CODEm covariates used, level of covariate, and expected direction of covariate by cause, sex, and age**

| Cause                    | Sex    | Age start | Age end | Model type | Direction | Covariate                        |
|--------------------------|--------|-----------|---------|------------|-----------|----------------------------------|
| Malignant skin melanoma  | Male   | 15 to 19  | 80 plus | Data Rich  | 1         | Animal Fats (kcal per capita)    |
| Malignant skin melanoma  | Male   | 15 to 19  | 80 plus | Data Rich  | 1         | Cumulative Cigarettes (20 Years) |
| Malignant skin melanoma  | Male   | 15 to 19  | 80 plus | Data Rich  | 1         | Mean BMI                         |
| Malignant skin melanoma  | Male   | 15 to 19  | 80 plus | Data Rich  | 1         | Smoking Prevalence               |
| Malignant skin melanoma  | Male   | 15 to 19  | 80 plus | Data Rich  | 1         | Tobacco (cigarettes per capita)  |
| Malignant skin melanoma  | Female | 15 to 19  | 80 plus | Global     | -1        | Education (years per capita)     |
| Malignant skin melanoma  | Female | 15 to 19  | 80 plus | Global     | -1        | Fruits (kcal per capita)         |
| Malignant skin melanoma  | Female | 15 to 19  | 80 plus | Global     | -1        | LDI (IS per capita)              |
| Malignant skin melanoma  | Female | 15 to 19  | 80 plus | Global     | -1        | Latitude 30 to 45 (proportion)   |
| Malignant skin melanoma  | Female | 15 to 19  | 80 plus | Global     | -1        | Latitude Over 45 (proportion)    |
| Malignant skin melanoma  | Female | 15 to 19  | 80 plus | Global     | -1        | Vegetables (kcal per capita)     |
| Malignant skin melanoma  | Female | 15 to 19  | 80 plus | Global     | 0         | Latitude 15 to 30 (proportion)   |
| Malignant skin melanoma  | Female | 15 to 19  | 80 plus | Global     | 0         | Sociodemographic Status          |
| Malignant skin melanoma  | Female | 15 to 19  | 80 plus | Global     | 1         | Alcohol (litres per capita)      |
| Malignant skin melanoma  | Female | 15 to 19  | 80 plus | Global     | 1         | Animal Fats (kcal per capita)    |
| Malignant skin melanoma  | Female | 15 to 19  | 80 plus | Global     | 1         | Cumulative Cigarettes (20 Years) |
| Malignant skin melanoma  | Female | 15 to 19  | 80 plus | Global     | 1         | Mean BMI                         |
| Malignant skin melanoma  | Female | 15 to 19  | 80 plus | Global     | 1         | Smoking Prevalence               |
| Malignant skin melanoma  | Female | 15 to 19  | 80 plus | Global     | 1         | Tobacco (cigarettes per capita)  |
| Malignant skin melanoma  | Female | 15 to 19  | 80 plus | Data Rich  | -1        | Education (years per capita)     |
| Malignant skin melanoma  | Female | 15 to 19  | 80 plus | Data Rich  | -1        | Fruits (kcal per capita)         |
| Malignant skin melanoma  | Female | 15 to 19  | 80 plus | Data Rich  | -1        | LDI (IS per capita)              |
| Malignant skin melanoma  | Female | 15 to 19  | 80 plus | Data Rich  | -1        | Latitude 30 to 45 (proportion)   |
| Malignant skin melanoma  | Female | 15 to 19  | 80 plus | Data Rich  | -1        | Latitude Over 45 (proportion)    |
| Malignant skin melanoma  | Female | 15 to 19  | 80 plus | Data Rich  | -1        | Vegetables (kcal per capita)     |
| Malignant skin melanoma  | Female | 15 to 19  | 80 plus | Data Rich  | 0         | Latitude 15 to 30 (proportion)   |
| Malignant skin melanoma  | Female | 15 to 19  | 80 plus | Data Rich  | 0         | Sociodemographic Status          |
| Malignant skin melanoma  | Female | 15 to 19  | 80 plus | Data Rich  | 1         | Alcohol (litres per capita)      |
| Malignant skin melanoma  | Female | 15 to 19  | 80 plus | Data Rich  | 1         | Animal Fats (kcal per capita)    |
| Malignant skin melanoma  | Female | 15 to 19  | 80 plus | Data Rich  | 1         | Cumulative Cigarettes (20 Years) |
| Malignant skin melanoma  | Female | 15 to 19  | 80 plus | Data Rich  | 1         | Mean BMI                         |
| Malignant skin melanoma  | Female | 15 to 19  | 80 plus | Data Rich  | 1         | Smoking Prevalence               |
| Malignant skin melanoma  | Female | 15 to 19  | 80 plus | Data Rich  | 1         | Tobacco (cigarettes per capita)  |
| Non-melanoma skin cancer | Male   | 15 to 19  | 80 plus | Global     | -1        | Education (years per capita)     |
| Non-melanoma skin cancer | Male   | 15 to 19  | 80 plus | Global     | -1        | LDI (IS per capita)              |
| Non-melanoma skin cancer | Male   | 15 to 19  | 80 plus | Global     | 0         | Average latitude                 |
| Non-melanoma skin cancer | Male   | 15 to 19  | 80 plus | Global     | 0         | Sociodemographic Status          |
| Non-melanoma skin cancer | Male   | 15 to 19  | 80 plus | Global     | 1         | Cumulative Cigarettes (10 Years) |
| Non-melanoma skin cancer | Male   | 15 to 19  | 80 plus | Global     | 1         | Cumulative Cigarettes (15 Years) |
| Non-melanoma skin cancer | Male   | 15 to 19  | 80 plus | Global     | 1         | Cumulative Cigarettes (5 Years)  |
| Non-melanoma skin cancer | Male   | 15 to 19  | 80 plus | Global     | 1         | Health System Access (capped)    |
| Non-melanoma skin cancer | Male   | 15 to 19  | 80 plus | Global     | 1         | Smoking Prevalence               |
| Non-melanoma skin cancer | Male   | 15 to 19  | 80 plus | Data Rich  | -1        | Education (years per capita)     |
| Non-melanoma skin cancer | Male   | 15 to 19  | 80 plus | Data Rich  | -1        | LDI (IS per capita)              |

**Appendix Table 10: CODEm covariates used, level of covariate, and expected direction of covariate by cause, sex, and age**

| Cause                    | Sex    | Age start | Age end | Model type | Direction | Covariate                            |
|--------------------------|--------|-----------|---------|------------|-----------|--------------------------------------|
| Non-melanoma skin cancer | Male   | 15 to 19  | 80 plus | Data Rich  | 0         | Average latitude                     |
| Non-melanoma skin cancer | Male   | 15 to 19  | 80 plus | Data Rich  | 0         | Sociodemographic Status              |
| Non-melanoma skin cancer | Male   | 15 to 19  | 80 plus | Data Rich  | 1         | Cumulative Cigarettes (10 Years)     |
| Non-melanoma skin cancer | Male   | 15 to 19  | 80 plus | Data Rich  | 1         | Cumulative Cigarettes (15 Years)     |
| Non-melanoma skin cancer | Male   | 15 to 19  | 80 plus | Data Rich  | 1         | Cumulative Cigarettes (5 Years)      |
| Non-melanoma skin cancer | Male   | 15 to 19  | 80 plus | Data Rich  | 1         | Health System Access (capped)        |
| Non-melanoma skin cancer | Male   | 15 to 19  | 80 plus | Data Rich  | 1         | Smoking Prevalence                   |
| Non-melanoma skin cancer | Female | 15 to 19  | 80 plus | Global     | -1        | Education (years per capita)         |
| Non-melanoma skin cancer | Female | 15 to 19  | 80 plus | Global     | -1        | LDI (IS per capita)                  |
| Non-melanoma skin cancer | Female | 15 to 19  | 80 plus | Global     | 0         | Average latitude                     |
| Non-melanoma skin cancer | Female | 15 to 19  | 80 plus | Global     | 0         | Sociodemographic Status              |
| Non-melanoma skin cancer | Female | 15 to 19  | 80 plus | Global     | 1         | Cumulative Cigarettes (10 Years)     |
| Non-melanoma skin cancer | Female | 15 to 19  | 80 plus | Global     | 1         | Cumulative Cigarettes (15 Years)     |
| Non-melanoma skin cancer | Female | 15 to 19  | 80 plus | Global     | 1         | Cumulative Cigarettes (5 Years)      |
| Non-melanoma skin cancer | Female | 15 to 19  | 80 plus | Global     | 1         | Health System Access (capped)        |
| Non-melanoma skin cancer | Female | 15 to 19  | 80 plus | Global     | 1         | Smoking Prevalence                   |
| Non-melanoma skin cancer | Female | 15 to 19  | 80 plus | Data Rich  | -1        | Education (years per capita)         |
| Non-melanoma skin cancer | Female | 15 to 19  | 80 plus | Data Rich  | -1        | LDI (IS per capita)                  |
| Non-melanoma skin cancer | Female | 15 to 19  | 80 plus | Data Rich  | 0         | Average latitude                     |
| Non-melanoma skin cancer | Female | 15 to 19  | 80 plus | Data Rich  | 0         | Sociodemographic Status              |
| Non-melanoma skin cancer | Female | 15 to 19  | 80 plus | Data Rich  | 1         | Cumulative Cigarettes (10 Years)     |
| Non-melanoma skin cancer | Female | 15 to 19  | 80 plus | Data Rich  | 1         | Cumulative Cigarettes (15 Years)     |
| Non-melanoma skin cancer | Female | 15 to 19  | 80 plus | Data Rich  | 1         | Cumulative Cigarettes (5 Years)      |
| Non-melanoma skin cancer | Female | 15 to 19  | 80 plus | Data Rich  | 1         | Health System Access (capped)        |
| Non-melanoma skin cancer | Female | 15 to 19  | 80 plus | Data Rich  | 1         | Smoking Prevalence                   |
| Breast cancer            | Male   | 15 to 19  | 80 plus | Global     | -1        | Education (years per capita)         |
| Breast cancer            | Male   | 15 to 19  | 80 plus | Global     | -1        | Fertility (15-19 year olds)          |
| Breast cancer            | Male   | 15 to 19  | 80 plus | Global     | -1        | Fruits (kcal per capita)             |
| Breast cancer            | Male   | 15 to 19  | 80 plus | Global     | -1        | Health System Access 2 (unitless)    |
| Breast cancer            | Male   | 15 to 19  | 80 plus | Global     | -1        | LDI (IS per capita)                  |
| Breast cancer            | Male   | 15 to 19  | 80 plus | Global     | -1        | Latitude 30 to 45 (proportion)       |
| Breast cancer            | Male   | 15 to 19  | 80 plus | Global     | -1        | Latitude Over 45 (proportion)        |
| Breast cancer            | Male   | 15 to 19  | 80 plus | Global     | -1        | Total Fertility Rate                 |
| Breast cancer            | Male   | 15 to 19  | 80 plus | Global     | -1        | Vegetables (kcal per capita)         |
| Breast cancer            | Male   | 15 to 19  | 80 plus | Global     | 0         | Latitude 15 to 30 (proportion)       |
| Breast cancer            | Male   | 15 to 19  | 80 plus | Global     | 0         | Sociodemographic Status              |
| Breast cancer            | Male   | 15 to 19  | 80 plus | Global     | 1         | Alcohol (litres per capita)          |
| Breast cancer            | Male   | 15 to 19  | 80 plus | Global     | 1         | Animal Fats (kcal per capita)        |
| Breast cancer            | Male   | 15 to 19  | 80 plus | Global     | 1         | Cumulative Cigarettes (10 Years)     |
| Breast cancer            | Male   | 15 to 19  | 80 plus | Global     | 1         | Log-transformed SEV scalar: Breast C |
| Breast cancer            | Male   | 15 to 19  | 80 plus | Global     | 1         | Mean BMI                             |
| Breast cancer            | Male   | 15 to 19  | 80 plus | Data Rich  | -1        | Education (years per capita)         |
| Breast cancer            | Male   | 15 to 19  | 80 plus | Data Rich  | -1        | Fertility (15-19 year olds)          |
| Breast cancer            | Male   | 15 to 19  | 80 plus | Data Rich  | -1        | Fruits (kcal per capita)             |

**Appendix Table 10: CODEm covariates used, level of covariate, and expected direction of covariate by cause, sex, and age**

| Cause         | Sex    | Age start | Age end | Model type | Direction | Covariate                            |
|---------------|--------|-----------|---------|------------|-----------|--------------------------------------|
| Breast cancer | Male   | 15 to 19  | 80 plus | Data Rich  | -1        | Health System Access 2 (unitless)    |
| Breast cancer | Male   | 15 to 19  | 80 plus | Data Rich  | -1        | LDI (IS per capita)                  |
| Breast cancer | Male   | 15 to 19  | 80 plus | Data Rich  | -1        | Latitude 30 to 45 (proportion)       |
| Breast cancer | Male   | 15 to 19  | 80 plus | Data Rich  | -1        | Latitude Over 45 (proportion)        |
| Breast cancer | Male   | 15 to 19  | 80 plus | Data Rich  | -1        | Total Fertility Rate                 |
| Breast cancer | Male   | 15 to 19  | 80 plus | Data Rich  | -1        | Vegetables (kcal per capita)         |
| Breast cancer | Male   | 15 to 19  | 80 plus | Data Rich  | 0         | Latitude 15 to 30 (proportion)       |
| Breast cancer | Male   | 15 to 19  | 80 plus | Data Rich  | 0         | Sociodemographic Status              |
| Breast cancer | Male   | 15 to 19  | 80 plus | Data Rich  | 1         | Alcohol (litres per capita)          |
| Breast cancer | Male   | 15 to 19  | 80 plus | Data Rich  | 1         | Animal Fats (kcal per capita)        |
| Breast cancer | Male   | 15 to 19  | 80 plus | Data Rich  | 1         | Cumulative Cigarettes (10 Years)     |
| Breast cancer | Male   | 15 to 19  | 80 plus | Data Rich  | 1         | Log-transformed SEV scalar: Breast C |
| Breast cancer | Male   | 15 to 19  | 80 plus | Data Rich  | 1         | Mean BMI                             |
| Breast cancer | Female | 15 to 19  | 80 plus | Global     | -1        | Education (years per capita)         |
| Breast cancer | Female | 15 to 19  | 80 plus | Global     | -1        | Fertility (15-19 year olds)          |
| Breast cancer | Female | 15 to 19  | 80 plus | Global     | -1        | Fruits (kcal per capita)             |
| Breast cancer | Female | 15 to 19  | 80 plus | Global     | -1        | Health System Access 2 (unitless)    |
| Breast cancer | Female | 15 to 19  | 80 plus | Global     | -1        | LDI (IS per capita)                  |
| Breast cancer | Female | 15 to 19  | 80 plus | Global     | -1        | Latitude 30 to 45 (proportion)       |
| Breast cancer | Female | 15 to 19  | 80 plus | Global     | -1        | Latitude Over 45 (proportion)        |
| Breast cancer | Female | 15 to 19  | 80 plus | Global     | -1        | Total Fertility Rate                 |
| Breast cancer | Female | 15 to 19  | 80 plus | Global     | -1        | Vegetables (kcal per capita)         |
| Breast cancer | Female | 15 to 19  | 80 plus | Global     | 0         | Latitude 15 to 30 (proportion)       |
| Breast cancer | Female | 15 to 19  | 80 plus | Global     | 0         | Sociodemographic Status              |
| Breast cancer | Female | 15 to 19  | 80 plus | Global     | 1         | Alcohol (litres per capita)          |
| Breast cancer | Female | 15 to 19  | 80 plus | Global     | 1         | Animal Fats (kcal per capita)        |
| Breast cancer | Female | 15 to 19  | 80 plus | Global     | 1         | Cumulative Cigarettes (10 Years)     |
| Breast cancer | Female | 15 to 19  | 80 plus | Global     | 1         | Log-transformed SEV scalar: Breast C |
| Breast cancer | Female | 15 to 19  | 80 plus | Global     | 1         | Mean BMI                             |
| Breast cancer | Female | 15 to 19  | 80 plus | Data Rich  | -1        | Education (years per capita)         |
| Breast cancer | Female | 15 to 19  | 80 plus | Data Rich  | -1        | Fertility (15-19 year olds)          |
| Breast cancer | Female | 15 to 19  | 80 plus | Data Rich  | -1        | Fruits (kcal per capita)             |
| Breast cancer | Female | 15 to 19  | 80 plus | Data Rich  | -1        | Health System Access 2 (unitless)    |
| Breast cancer | Female | 15 to 19  | 80 plus | Data Rich  | -1        | LDI (IS per capita)                  |
| Breast cancer | Female | 15 to 19  | 80 plus | Data Rich  | -1        | Latitude 30 to 45 (proportion)       |
| Breast cancer | Female | 15 to 19  | 80 plus | Data Rich  | -1        | Latitude Over 45 (proportion)        |
| Breast cancer | Female | 15 to 19  | 80 plus | Data Rich  | -1        | Total Fertility Rate                 |
| Breast cancer | Female | 15 to 19  | 80 plus | Data Rich  | -1        | Vegetables (kcal per capita)         |
| Breast cancer | Female | 15 to 19  | 80 plus | Data Rich  | 0         | Latitude 15 to 30 (proportion)       |
| Breast cancer | Female | 15 to 19  | 80 plus | Data Rich  | 0         | Sociodemographic Status              |
| Breast cancer | Female | 15 to 19  | 80 plus | Data Rich  | 1         | Alcohol (litres per capita)          |
| Breast cancer | Female | 15 to 19  | 80 plus | Data Rich  | 1         | Animal Fats (kcal per capita)        |
| Breast cancer | Female | 15 to 19  | 80 plus | Data Rich  | 1         | Cumulative Cigarettes (10 Years)     |
| Breast cancer | Female | 15 to 19  | 80 plus | Data Rich  | 1         | Log-transformed SEV scalar: Breast C |

**Appendix Table 10: CODEm covariates used, level of covariate, and expected direction of covariate by cause, sex, and age**

| Cause           | Sex    | Age start | Age end | Model type | Direction | Covariate                                         |
|-----------------|--------|-----------|---------|------------|-----------|---------------------------------------------------|
| Breast cancer   | Female | 15 to 19  | 80 plus | Data Rich  | 1         | Mean BMI                                          |
| Cervical cancer | Female | 15 to 19  | 80 plus | Global     | -1        | Education (years per capita)                      |
| Cervical cancer | Female | 15 to 19  | 80 plus | Global     | -1        | Fruits (kcal per capita)                          |
| Cervical cancer | Female | 15 to 19  | 80 plus | Global     | -1        | Health System Access 2 (unitless)                 |
| Cervical cancer | Female | 15 to 19  | 80 plus | Global     | -1        | LDI (IS per capita)                               |
| Cervical cancer | Female | 15 to 19  | 80 plus | Global     | -1        | Sociodemographic Status                           |
| Cervical cancer | Female | 15 to 19  | 80 plus | Global     | -1        | Vegetables (kcal per capita)                      |
| Cervical cancer | Female | 15 to 19  | 80 plus | Global     | 1         | Abortion On-Demand Illegal (binary)               |
| Cervical cancer | Female | 15 to 19  | 80 plus | Global     | 1         | Cumulative Cigarettes (10 Years)                  |
| Cervical cancer | Female | 15 to 19  | 80 plus | Global     | 1         | Cumulative Cigarettes (15 Years)                  |
| Cervical cancer | Female | 15 to 19  | 80 plus | Global     | 1         | Cumulative Cigarettes (5 Years)                   |
| Cervical cancer | Female | 15 to 19  | 80 plus | Global     | 1         | Fertility (15-19 year olds)                       |
| Cervical cancer | Female | 15 to 19  | 80 plus | Global     | 1         | HIV age-standardized prevalence                   |
| Cervical cancer | Female | 15 to 19  | 80 plus | Global     | 1         | Smoking Prevalence                                |
| Cervical cancer | Female | 15 to 19  | 80 plus | Global     | 1         | Total Fertility Rate                              |
| Cervical cancer | Female | 15 to 19  | 80 plus | Data Rich  | -1        | Education (years per capita)                      |
| Cervical cancer | Female | 15 to 19  | 80 plus | Data Rich  | -1        | Fruits (kcal per capita)                          |
| Cervical cancer | Female | 15 to 19  | 80 plus | Data Rich  | -1        | Health System Access 2 (unitless)                 |
| Cervical cancer | Female | 15 to 19  | 80 plus | Data Rich  | -1        | LDI (IS per capita)                               |
| Cervical cancer | Female | 15 to 19  | 80 plus | Data Rich  | -1        | Sociodemographic Status                           |
| Cervical cancer | Female | 15 to 19  | 80 plus | Data Rich  | -1        | Vegetables (kcal per capita)                      |
| Cervical cancer | Female | 15 to 19  | 80 plus | Data Rich  | 1         | Abortion On-Demand Illegal (binary)               |
| Cervical cancer | Female | 15 to 19  | 80 plus | Data Rich  | 1         | Cumulative Cigarettes (10 Years)                  |
| Cervical cancer | Female | 15 to 19  | 80 plus | Data Rich  | 1         | Cumulative Cigarettes (15 Years)                  |
| Cervical cancer | Female | 15 to 19  | 80 plus | Data Rich  | 1         | Cumulative Cigarettes (5 Years)                   |
| Cervical cancer | Female | 15 to 19  | 80 plus | Data Rich  | 1         | Fertility (15-19 year olds)                       |
| Cervical cancer | Female | 15 to 19  | 80 plus | Data Rich  | 1         | HIV age-standardized prevalence                   |
| Cervical cancer | Female | 15 to 19  | 80 plus | Data Rich  | 1         | Smoking Prevalence                                |
| Cervical cancer | Female | 15 to 19  | 80 plus | Data Rich  | 1         | Total Fertility Rate                              |
| Uterine cancer  | Female | 15 to 19  | 80 plus | Global     | -1        | Education (years per capita)                      |
| Uterine cancer  | Female | 15 to 19  | 80 plus | Global     | -1        | Fruits (kcal per capita)                          |
| Uterine cancer  | Female | 15 to 19  | 80 plus | Global     | -1        | Health System Access (unitless)                   |
| Uterine cancer  | Female | 15 to 19  | 80 plus | Global     | -1        | LDI (IS per capita)                               |
| Uterine cancer  | Female | 15 to 19  | 80 plus | Global     | -1        | Vegetables (kcal per capita)                      |
| Uterine cancer  | Female | 15 to 19  | 80 plus | Global     | 0         | Sociodemographic Status                           |
| Uterine cancer  | Female | 15 to 19  | 80 plus | Global     | 0         | Total Fertility Rate                              |
| Uterine cancer  | Female | 15 to 19  | 80 plus | Global     | 1         | Cumulative Cigarettes (10 Years)                  |
| Uterine cancer  | Female | 15 to 19  | 80 plus | Global     | 1         | Cumulative Cigarettes (5 Years)                   |
| Uterine cancer  | Female | 15 to 19  | 80 plus | Global     | 1         | Diabetes Age-Standardised Prevalence (proportion) |
| Uterine cancer  | Female | 15 to 19  | 80 plus | Global     | 1         | Log-transformed SEV scalar: Uterus C              |
| Uterine cancer  | Female | 15 to 19  | 80 plus | Global     | 1         | Mean BMI                                          |
| Uterine cancer  | Female | 15 to 19  | 80 plus | Global     | 1         | Smoking Prevalence                                |
| Uterine cancer  | Female | 15 to 19  | 80 plus | Global     | 1         | Tobacco (cigarettes per capita)                   |
| Uterine cancer  | Female | 15 to 19  | 80 plus | Data Rich  | -1        | Education (years per capita)                      |

**Appendix Table 10: CODEm covariates used, level of covariate, and expected direction of covariate by cause, sex, and age**

| Cause          | Sex    | Age start | Age end | Model type | Direction | Covariate                                         |
|----------------|--------|-----------|---------|------------|-----------|---------------------------------------------------|
| Uterine cancer | Female | 15 to 19  | 80 plus | Data Rich  | -1        | Fruits (kcal per capita)                          |
| Uterine cancer | Female | 15 to 19  | 80 plus | Data Rich  | -1        | Health System Access (unitless)                   |
| Uterine cancer | Female | 15 to 19  | 80 plus | Data Rich  | -1        | LDI (I\$ per capita)                              |
| Uterine cancer | Female | 15 to 19  | 80 plus | Data Rich  | -1        | Vegetables (kcal per capita)                      |
| Uterine cancer | Female | 15 to 19  | 80 plus | Data Rich  | 0         | Sociodemographic Status                           |
| Uterine cancer | Female | 15 to 19  | 80 plus | Data Rich  | 0         | Total Fertility Rate                              |
| Uterine cancer | Female | 15 to 19  | 80 plus | Data Rich  | 1         | Cumulative Cigarettes (10 Years)                  |
| Uterine cancer | Female | 15 to 19  | 80 plus | Data Rich  | 1         | Cumulative Cigarettes (5 Years)                   |
| Uterine cancer | Female | 15 to 19  | 80 plus | Data Rich  | 1         | Diabetes Age-Standardised Prevalence (proportion) |
| Uterine cancer | Female | 15 to 19  | 80 plus | Data Rich  | 1         | Log-transformed SEV scalar: Uterus C              |
| Uterine cancer | Female | 15 to 19  | 80 plus | Data Rich  | 1         | Mean BMI                                          |
| Uterine cancer | Female | 15 to 19  | 80 plus | Data Rich  | 1         | Smoking Prevalence                                |
| Uterine cancer | Female | 15 to 19  | 80 plus | Data Rich  | 1         | Tobacco (cigarettes per capita)                   |
| Ovarian cancer | Female | 15 to 19  | 80 plus | Global     | -1        | Contraception (Modern) Prevalence (proportion)    |
| Ovarian cancer | Female | 15 to 19  | 80 plus | Global     | -1        | Education (years per capita)                      |
| Ovarian cancer | Female | 15 to 19  | 80 plus | Global     | -1        | Fruits (kcal per capita)                          |
| Ovarian cancer | Female | 15 to 19  | 80 plus | Global     | -1        | LDI (I\$ per capita)                              |
| Ovarian cancer | Female | 15 to 19  | 80 plus | Global     | -1        | Latitude 30 to 45 (proportion)                    |
| Ovarian cancer | Female | 15 to 19  | 80 plus | Global     | -1        | Latitude Over 45 (proportion)                     |
| Ovarian cancer | Female | 15 to 19  | 80 plus | Global     | -1        | Vegetables (kcal per capita)                      |
| Ovarian cancer | Female | 15 to 19  | 80 plus | Global     | 0         | Latitude 15 to 30 (proportion)                    |
| Ovarian cancer | Female | 15 to 19  | 80 plus | Global     | 0         | Sociodemographic Status                           |
| Ovarian cancer | Female | 15 to 19  | 80 plus | Global     | 0         | Total Fertility Rate                              |
| Ovarian cancer | Female | 15 to 19  | 80 plus | Global     | 1         | Alcohol (litres per capita)                       |
| Ovarian cancer | Female | 15 to 19  | 80 plus | Global     | 1         | Animal Fats (kcal per capita)                     |
| Ovarian cancer | Female | 15 to 19  | 80 plus | Global     | 1         | Cumulative Cigarettes (20 Years)                  |
| Ovarian cancer | Female | 15 to 19  | 80 plus | Global     | 1         | Diabetes Age-Standardised Prevalence (proportion) |
| Ovarian cancer | Female | 15 to 19  | 80 plus | Global     | 1         | Log-transformed SEV scalar: Ovary C               |
| Ovarian cancer | Female | 15 to 19  | 80 plus | Global     | 1         | Mean BMI                                          |
| Ovarian cancer | Female | 15 to 19  | 80 plus | Global     | 1         | Smoking Prevalence                                |
| Ovarian cancer | Female | 15 to 19  | 80 plus | Global     | 1         | Tobacco (cigarettes per capita)                   |
| Ovarian cancer | Female | 15 to 19  | 80 plus | Global     | 1         | Total Calories (kcal per capita)                  |
| Ovarian cancer | Female | 15 to 19  | 80 plus | Data Rich  | -1        | Contraception (Modern) Prevalence (proportion)    |
| Ovarian cancer | Female | 15 to 19  | 80 plus | Data Rich  | -1        | Education (years per capita)                      |
| Ovarian cancer | Female | 15 to 19  | 80 plus | Data Rich  | -1        | Fruits (kcal per capita)                          |
| Ovarian cancer | Female | 15 to 19  | 80 plus | Data Rich  | -1        | LDI (I\$ per capita)                              |
| Ovarian cancer | Female | 15 to 19  | 80 plus | Data Rich  | -1        | Latitude 30 to 45 (proportion)                    |
| Ovarian cancer | Female | 15 to 19  | 80 plus | Data Rich  | -1        | Latitude Over 45 (proportion)                     |
| Ovarian cancer | Female | 15 to 19  | 80 plus | Data Rich  | -1        | Vegetables (kcal per capita)                      |
| Ovarian cancer | Female | 15 to 19  | 80 plus | Data Rich  | 0         | Latitude 15 to 30 (proportion)                    |
| Ovarian cancer | Female | 15 to 19  | 80 plus | Data Rich  | 0         | Sociodemographic Status                           |
| Ovarian cancer | Female | 15 to 19  | 80 plus | Data Rich  | 0         | Total Fertility Rate                              |
| Ovarian cancer | Female | 15 to 19  | 80 plus | Data Rich  | 1         | Alcohol (litres per capita)                       |
| Ovarian cancer | Female | 15 to 19  | 80 plus | Data Rich  | 1         | Animal Fats (kcal per capita)                     |

**Appendix Table 10: CODEm covariates used, level of covariate, and expected direction of covariate by cause, sex, and age**

| Cause             | Sex    | Age start     | Age end | Model type | Direction | Covariate                                         |
|-------------------|--------|---------------|---------|------------|-----------|---------------------------------------------------|
| Ovarian cancer    | Female | 15 to 19      | 80 plus | Data Rich  | 1         | Cumulative Cigarettes (20 Years)                  |
| Ovarian cancer    | Female | 15 to 19      | 80 plus | Data Rich  | 1         | Diabetes Age-Standardised Prevalence (proportion) |
| Ovarian cancer    | Female | 15 to 19      | 80 plus | Data Rich  | 1         | Log-transformed SEV scalar: Ovary C               |
| Ovarian cancer    | Female | 15 to 19      | 80 plus | Data Rich  | 1         | Mean BMI                                          |
| Ovarian cancer    | Female | 15 to 19      | 80 plus | Data Rich  | 1         | Smoking Prevalence                                |
| Ovarian cancer    | Female | 15 to 19      | 80 plus | Data Rich  | 1         | Tobacco (cigarettes per capita)                   |
| Ovarian cancer    | Female | 15 to 19      | 80 plus | Data Rich  | 1         | Total Calories (kcal per capita)                  |
| Prostate cancer   | Male   | 15 to 19      | 80 plus | Global     | -1        | Health System Access 2 (unitless)                 |
| Prostate cancer   | Male   | 15 to 19      | 80 plus | Global     | 0         | Education (years per capita)                      |
| Prostate cancer   | Male   | 15 to 19      | 80 plus | Global     | 0         | LDI (IS per capita)                               |
| Prostate cancer   | Male   | 15 to 19      | 80 plus | Global     | 0         | Sociodemographic Status                           |
| Prostate cancer   | Male   | 15 to 19      | 80 plus | Global     | 1         | Animal Fats (kcal per capita)                     |
| Prostate cancer   | Male   | 15 to 19      | 80 plus | Global     | 1         | Log-transformed SEV scalar: Prostate C            |
| Prostate cancer   | Male   | 15 to 19      | 80 plus | Data Rich  | -1        | Health System Access 2 (unitless)                 |
| Prostate cancer   | Male   | 15 to 19      | 80 plus | Data Rich  | 0         | Education (years per capita)                      |
| Prostate cancer   | Male   | 15 to 19      | 80 plus | Data Rich  | 0         | LDI (IS per capita)                               |
| Prostate cancer   | Male   | 15 to 19      | 80 plus | Data Rich  | 0         | Sociodemographic Status                           |
| Prostate cancer   | Male   | 15 to 19      | 80 plus | Data Rich  | 1         | Animal Fats (kcal per capita)                     |
| Prostate cancer   | Male   | 15 to 19      | 80 plus | Data Rich  | 1         | Log-transformed SEV scalar: Prostate C            |
| Testicular cancer | Male   | 15 to 19      | 80 plus | Global     | -1        | Education (years per capita)                      |
| Testicular cancer | Male   | 15 to 19      | 80 plus | Global     | -1        | Fruits (kcal per capita)                          |
| Testicular cancer | Male   | 15 to 19      | 80 plus | Global     | -1        | Health System Access 2 (unitless)                 |
| Testicular cancer | Male   | 15 to 19      | 80 plus | Global     | -1        | LDI (IS per capita)                               |
| Testicular cancer | Male   | 15 to 19      | 80 plus | Global     | -1        | Vegetables (kcal per capita)                      |
| Testicular cancer | Male   | 15 to 19      | 80 plus | Global     | 0         | Sociodemographic Status                           |
| Testicular cancer | Male   | 15 to 19      | 80 plus | Global     | 1         | Cumulative Cigarettes (10 Years)                  |
| Testicular cancer | Male   | 15 to 19      | 80 plus | Global     | 1         | Cumulative Cigarettes (15 Years)                  |
| Testicular cancer | Male   | 15 to 19      | 80 plus | Global     | 1         | Cumulative Cigarettes (5 Years)                   |
| Testicular cancer | Male   | 15 to 19      | 80 plus | Data Rich  | -1        | Education (years per capita)                      |
| Testicular cancer | Male   | 15 to 19      | 80 plus | Data Rich  | -1        | Fruits (kcal per capita)                          |
| Testicular cancer | Male   | 15 to 19      | 80 plus | Data Rich  | -1        | Health System Access 2 (unitless)                 |
| Testicular cancer | Male   | 15 to 19      | 80 plus | Data Rich  | -1        | LDI (IS per capita)                               |
| Testicular cancer | Male   | 15 to 19      | 80 plus | Data Rich  | -1        | Vegetables (kcal per capita)                      |
| Testicular cancer | Male   | 15 to 19      | 80 plus | Data Rich  | 0         | Sociodemographic Status                           |
| Testicular cancer | Male   | 15 to 19      | 80 plus | Data Rich  | 1         | Cumulative Cigarettes (10 Years)                  |
| Testicular cancer | Male   | 15 to 19      | 80 plus | Data Rich  | 1         | Cumulative Cigarettes (15 Years)                  |
| Testicular cancer | Male   | 15 to 19      | 80 plus | Data Rich  | 1         | Cumulative Cigarettes (5 Years)                   |
| Kidney cancer     | Male   | Post Neonatal | 80 plus | Global     | -1        | Education (years per capita)                      |
| Kidney cancer     | Male   | Post Neonatal | 80 plus | Global     | -1        | Health System Access 2 (unitless)                 |
| Kidney cancer     | Male   | Post Neonatal | 80 plus | Global     | -1        | LDI (IS per capita)                               |
| Kidney cancer     | Male   | Post Neonatal | 80 plus | Global     | 0         | Total Fertility Rate                              |
| Kidney cancer     | Male   | Post Neonatal | 80 plus | Global     | 1         | Alcohol (litres per capita)                       |
| Kidney cancer     | Male   | Post Neonatal | 80 plus | Global     | 1         | Cumulative Cigarettes (10 Years)                  |
| Kidney cancer     | Male   | Post Neonatal | 80 plus | Global     | 1         | Cumulative Cigarettes (15 Years)                  |



**Appendix Table 10: CODEm covariates used, level of covariate, and expected direction of covariate by cause, sex, and age**

| Cause         | Sex    | Age start     | Age end | Model type | Direction | Covariate                                         |
|---------------|--------|---------------|---------|------------|-----------|---------------------------------------------------|
| Kidney cancer | Male   | Post Neonatal | 80 plus | Global     | 1         | Cumulative Cigarettes (5 Years)                   |
| Kidney cancer | Male   | Post Neonatal | 80 plus | Global     | 1         | Diabetes Age-Standardised Prevalence (proportion) |
| Kidney cancer | Male   | Post Neonatal | 80 plus | Global     | 1         | Log-transformed SEV scalar: Kidney C              |
| Kidney cancer | Male   | Post Neonatal | 80 plus | Global     | 1         | Mean BMI                                          |
| Kidney cancer | Male   | Post Neonatal | 80 plus | Global     | 1         | Smoking Prevalence                                |
| Kidney cancer | Male   | Post Neonatal | 80 plus | Global     | 1         | Sociodemographic Status                           |
| Kidney cancer | Male   | Post Neonatal | 80 plus | Global     | 1         | Systolic Blood Pressure (mmHg)                    |
| Kidney cancer | Male   | Post Neonatal | 80 plus | Global     | 1         | Total Calories (kcal per capita)                  |
| Kidney cancer | Male   | Post Neonatal | 80 plus | Data Rich  | -1        | Education (years per capita)                      |
| Kidney cancer | Male   | Post Neonatal | 80 plus | Data Rich  | -1        | Health System Access 2 (unitless)                 |
| Kidney cancer | Male   | Post Neonatal | 80 plus | Data Rich  | -1        | LDI (IS per capita)                               |
| Kidney cancer | Male   | Post Neonatal | 80 plus | Data Rich  | 0         | Total Fertility Rate                              |
| Kidney cancer | Male   | Post Neonatal | 80 plus | Data Rich  | 1         | Alcohol (litres per capita)                       |
| Kidney cancer | Male   | Post Neonatal | 80 plus | Data Rich  | 1         | Cumulative Cigarettes (10 Years)                  |
| Kidney cancer | Male   | Post Neonatal | 80 plus | Data Rich  | 1         | Cumulative Cigarettes (15 Years)                  |
| Kidney cancer | Male   | Post Neonatal | 80 plus | Data Rich  | 1         | Cumulative Cigarettes (5 Years)                   |
| Kidney cancer | Male   | Post Neonatal | 80 plus | Data Rich  | 1         | Diabetes Age-Standardised Prevalence (proportion) |
| Kidney cancer | Male   | Post Neonatal | 80 plus | Data Rich  | 1         | Log-transformed SEV scalar: Kidney C              |
| Kidney cancer | Male   | Post Neonatal | 80 plus | Data Rich  | 1         | Mean BMI                                          |
| Kidney cancer | Male   | Post Neonatal | 80 plus | Data Rich  | 1         | Smoking Prevalence                                |
| Kidney cancer | Male   | Post Neonatal | 80 plus | Data Rich  | 1         | Sociodemographic Status                           |
| Kidney cancer | Male   | Post Neonatal | 80 plus | Data Rich  | 1         | Systolic Blood Pressure (mmHg)                    |
| Kidney cancer | Male   | Post Neonatal | 80 plus | Data Rich  | 1         | Total Calories (kcal per capita)                  |
| Kidney cancer | Female | Post Neonatal | 80 plus | Global     | -1        | Education (years per capita)                      |
| Kidney cancer | Female | Post Neonatal | 80 plus | Global     | -1        | Health System Access 2 (unitless)                 |
| Kidney cancer | Female | Post Neonatal | 80 plus | Global     | -1        | LDI (IS per capita)                               |
| Kidney cancer | Female | Post Neonatal | 80 plus | Global     | 0         | Total Fertility Rate                              |
| Kidney cancer | Female | Post Neonatal | 80 plus | Global     | 1         | Alcohol (litres per capita)                       |
| Kidney cancer | Female | Post Neonatal | 80 plus | Global     | 1         | Cumulative Cigarettes (10 Years)                  |
| Kidney cancer | Female | Post Neonatal | 80 plus | Global     | 1         | Cumulative Cigarettes (15 Years)                  |
| Kidney cancer | Female | Post Neonatal | 80 plus | Global     | 1         | Cumulative Cigarettes (5 Years)                   |
| Kidney cancer | Female | Post Neonatal | 80 plus | Global     | 1         | Diabetes Age-Standardised Prevalence (proportion) |
| Kidney cancer | Female | Post Neonatal | 80 plus | Global     | 1         | Log-transformed SEV scalar: Kidney C              |
| Kidney cancer | Female | Post Neonatal | 80 plus | Global     | 1         | Mean BMI                                          |
| Kidney cancer | Female | Post Neonatal | 80 plus | Global     | 1         | Smoking Prevalence                                |
| Kidney cancer | Female | Post Neonatal | 80 plus | Global     | 1         | Sociodemographic Status                           |
| Kidney cancer | Female | Post Neonatal | 80 plus | Global     | 1         | Systolic Blood Pressure (mmHg)                    |
| Kidney cancer | Female | Post Neonatal | 80 plus | Global     | 1         | Total Calories (kcal per capita)                  |
| Kidney cancer | Female | Post Neonatal | 80 plus | Data Rich  | -1        | Education (years per capita)                      |
| Kidney cancer | Female | Post Neonatal | 80 plus | Data Rich  | -1        | Health System Access 2 (unitless)                 |
| Kidney cancer | Female | Post Neonatal | 80 plus | Data Rich  | -1        | LDI (IS per capita)                               |
| Kidney cancer | Female | Post Neonatal | 80 plus | Data Rich  | 0         | Total Fertility Rate                              |
| Kidney cancer | Female | Post Neonatal | 80 plus | Data Rich  | 1         | Alcohol (litres per capita)                       |
| Kidney cancer | Female | Post Neonatal | 80 plus | Data Rich  | 1         | Cumulative Cigarettes (10 Years)                  |

**Appendix Table 10: CODEm covariates used, level of covariate, and expected direction of covariate by cause, sex, and age**

| Cause          | Sex    | Age start     | Age end | Model type | Direction | Covariate                                           |
|----------------|--------|---------------|---------|------------|-----------|-----------------------------------------------------|
| Kidney cancer  | Female | Post Neonatal | 80 plus | Data Rich  | 1         | Cumulative Cigarettes (15 Years)                    |
| Kidney cancer  | Female | Post Neonatal | 80 plus | Data Rich  | 1         | Cumulative Cigarettes (5 Years)                     |
| Kidney cancer  | Female | Post Neonatal | 80 plus | Data Rich  | 1         | Diabetes Age-Standardised Prevalence (proportion)   |
| Kidney cancer  | Female | Post Neonatal | 80 plus | Data Rich  | 1         | Log-transformed SEV scalar: Kidney C                |
| Kidney cancer  | Female | Post Neonatal | 80 plus | Data Rich  | 1         | Mean BMI                                            |
| Kidney cancer  | Female | Post Neonatal | 80 plus | Data Rich  | 1         | Smoking Prevalence                                  |
| Kidney cancer  | Female | Post Neonatal | 80 plus | Data Rich  | 1         | Sociodemographic Status                             |
| Kidney cancer  | Female | Post Neonatal | 80 plus | Data Rich  | 1         | Systolic Blood Pressure (mmHg)                      |
| Kidney cancer  | Female | Post Neonatal | 80 plus | Data Rich  | 1         | Total Calories (kcal per capita)                    |
| Bladder cancer | Male   | 15 to 19      | 80 plus | Global     | -1        | Education (years per capita)                        |
| Bladder cancer | Male   | 15 to 19      | 80 plus | Global     | -1        | Fruits (kcal per capita)                            |
| Bladder cancer | Male   | 15 to 19      | 80 plus | Global     | -1        | Health System Access 2 (unitless)                   |
| Bladder cancer | Male   | 15 to 19      | 80 plus | Global     | -1        | LDI (IS per capita)                                 |
| Bladder cancer | Male   | 15 to 19      | 80 plus | Global     | -1        | Vegetables (kcal per capita)                        |
| Bladder cancer | Male   | 15 to 19      | 80 plus | Global     | 0         | Sociodemographic Status                             |
| Bladder cancer | Male   | 15 to 19      | 80 plus | Global     | 1         | Alcohol (litres per capita)                         |
| Bladder cancer | Male   | 15 to 19      | 80 plus | Global     | 1         | Cumulative Cigarettes (10 Years)                    |
| Bladder cancer | Male   | 15 to 19      | 80 plus | Global     | 1         | Cumulative Cigarettes (15 Years)                    |
| Bladder cancer | Male   | 15 to 19      | 80 plus | Global     | 1         | Cumulative Cigarettes (5 Years)                     |
| Bladder cancer | Male   | 15 to 19      | 80 plus | Global     | 1         | Log-transformed SEV scalar: Bladder C               |
| Bladder cancer | Male   | 15 to 19      | 80 plus | Global     | 1         | Population Density (over 1000 ppl/sqkm, proportion) |
| Bladder cancer | Male   | 15 to 19      | 80 plus | Global     | 1         | Population Density (under 150 ppl/sqkm, proportion) |
| Bladder cancer | Male   | 15 to 19      | 80 plus | Global     | 1         | Smoking Prevalence                                  |
| Bladder cancer | Male   | 15 to 19      | 80 plus | Data Rich  | -1        | Education (years per capita)                        |
| Bladder cancer | Male   | 15 to 19      | 80 plus | Data Rich  | -1        | Fruits (kcal per capita)                            |
| Bladder cancer | Male   | 15 to 19      | 80 plus | Data Rich  | -1        | Health System Access 2 (unitless)                   |
| Bladder cancer | Male   | 15 to 19      | 80 plus | Data Rich  | -1        | LDI (IS per capita)                                 |
| Bladder cancer | Male   | 15 to 19      | 80 plus | Data Rich  | -1        | Vegetables (kcal per capita)                        |
| Bladder cancer | Male   | 15 to 19      | 80 plus | Data Rich  | 0         | Sociodemographic Status                             |
| Bladder cancer | Male   | 15 to 19      | 80 plus | Data Rich  | 1         | Alcohol (litres per capita)                         |
| Bladder cancer | Male   | 15 to 19      | 80 plus | Data Rich  | 1         | Cumulative Cigarettes (10 Years)                    |
| Bladder cancer | Male   | 15 to 19      | 80 plus | Data Rich  | 1         | Cumulative Cigarettes (15 Years)                    |
| Bladder cancer | Male   | 15 to 19      | 80 plus | Data Rich  | 1         | Cumulative Cigarettes (5 Years)                     |
| Bladder cancer | Male   | 15 to 19      | 80 plus | Data Rich  | 1         | Log-transformed SEV scalar: Bladder C               |
| Bladder cancer | Male   | 15 to 19      | 80 plus | Data Rich  | 1         | Population Density (over 1000 ppl/sqkm, proportion) |
| Bladder cancer | Male   | 15 to 19      | 80 plus | Data Rich  | 1         | Population Density (under 150 ppl/sqkm, proportion) |
| Bladder cancer | Male   | 15 to 19      | 80 plus | Data Rich  | 1         | Smoking Prevalence                                  |
| Bladder cancer | Female | 15 to 19      | 80 plus | Global     | -1        | Education (years per capita)                        |
| Bladder cancer | Female | 15 to 19      | 80 plus | Global     | -1        | Fruits (kcal per capita)                            |
| Bladder cancer | Female | 15 to 19      | 80 plus | Global     | -1        | Health System Access 2 (unitless)                   |
| Bladder cancer | Female | 15 to 19      | 80 plus | Global     | -1        | LDI (IS per capita)                                 |
| Bladder cancer | Female | 15 to 19      | 80 plus | Global     | -1        | Vegetables (kcal per capita)                        |
| Bladder cancer | Female | 15 to 19      | 80 plus | Global     | 0         | Sociodemographic Status                             |
| Bladder cancer | Female | 15 to 19      | 80 plus | Global     | 1         | Alcohol (litres per capita)                         |

**Appendix Table 10: CODEm covariates used, level of covariate, and expected direction of covariate by cause, sex, and age**

| Cause                           | Sex    | Age start | Age end | Model type | Direction | Covariate                                           |
|---------------------------------|--------|-----------|---------|------------|-----------|-----------------------------------------------------|
| Bladder cancer                  | Female | 15 to 19  | 80 plus | Global     | 1         | Cumulative Cigarettes (10 Years)                    |
| Bladder cancer                  | Female | 15 to 19  | 80 plus | Global     | 1         | Cumulative Cigarettes (15 Years)                    |
| Bladder cancer                  | Female | 15 to 19  | 80 plus | Global     | 1         | Cumulative Cigarettes (5 Years)                     |
| Bladder cancer                  | Female | 15 to 19  | 80 plus | Global     | 1         | Log-transformed SEV scalar: Bladder C               |
| Bladder cancer                  | Female | 15 to 19  | 80 plus | Global     | 1         | Population Density (over 1000 ppl/sqkm, proportion) |
| Bladder cancer                  | Female | 15 to 19  | 80 plus | Global     | 1         | Population Density (under 150 ppl/sqkm, proportion) |
| Bladder cancer                  | Female | 15 to 19  | 80 plus | Global     | 1         | Smoking Prevalence                                  |
| Bladder cancer                  | Female | 15 to 19  | 80 plus | Data Rich  | -1        | Education (years per capita)                        |
| Bladder cancer                  | Female | 15 to 19  | 80 plus | Data Rich  | -1        | Fruits (kcal per capita)                            |
| Bladder cancer                  | Female | 15 to 19  | 80 plus | Data Rich  | -1        | Health System Access 2 (unitless)                   |
| Bladder cancer                  | Female | 15 to 19  | 80 plus | Data Rich  | -1        | LDI (IS per capita)                                 |
| Bladder cancer                  | Female | 15 to 19  | 80 plus | Data Rich  | -1        | Vegetables (kcal per capita)                        |
| Bladder cancer                  | Female | 15 to 19  | 80 plus | Data Rich  | 0         | Sociodemographic Status                             |
| Bladder cancer                  | Female | 15 to 19  | 80 plus | Data Rich  | 1         | Alcohol (litres per capita)                         |
| Bladder cancer                  | Female | 15 to 19  | 80 plus | Data Rich  | 1         | Cumulative Cigarettes (10 Years)                    |
| Bladder cancer                  | Female | 15 to 19  | 80 plus | Data Rich  | 1         | Cumulative Cigarettes (15 Years)                    |
| Bladder cancer                  | Female | 15 to 19  | 80 plus | Data Rich  | 1         | Cumulative Cigarettes (5 Years)                     |
| Bladder cancer                  | Female | 15 to 19  | 80 plus | Data Rich  | 1         | Log-transformed SEV scalar: Bladder C               |
| Bladder cancer                  | Female | 15 to 19  | 80 plus | Data Rich  | 1         | Population Density (over 1000 ppl/sqkm, proportion) |
| Bladder cancer                  | Female | 15 to 19  | 80 plus | Data Rich  | 1         | Population Density (under 150 ppl/sqkm, proportion) |
| Bladder cancer                  | Female | 15 to 19  | 80 plus | Data Rich  | 1         | Smoking Prevalence                                  |
| Brain and nervous system cancer | Male   | 1 to 4    | 80 plus | Global     | -1        | Education (years per capita)                        |
| Brain and nervous system cancer | Male   | 1 to 4    | 80 plus | Global     | -1        | Fruits (kcal per capita)                            |
| Brain and nervous system cancer | Male   | 1 to 4    | 80 plus | Global     | -1        | Health System Access 2 (unitless)                   |
| Brain and nervous system cancer | Male   | 1 to 4    | 80 plus | Global     | -1        | LDI (IS per capita)                                 |
| Brain and nervous system cancer | Male   | 1 to 4    | 80 plus | Global     | -1        | Vegetables (kcal per capita)                        |
| Brain and nervous system cancer | Male   | 1 to 4    | 80 plus | Global     | 1         | Alcohol (litres per capita)                         |
| Brain and nervous system cancer | Male   | 1 to 4    | 80 plus | Global     | 1         | Animal Fats (kcal per capita)                       |
| Brain and nervous system cancer | Male   | 1 to 4    | 80 plus | Global     | 1         | Cholesterol (total, mean per capita)                |
| Brain and nervous system cancer | Male   | 1 to 4    | 80 plus | Global     | 1         | Cumulative Cigarettes (10 Years)                    |
| Brain and nervous system cancer | Male   | 1 to 4    | 80 plus | Global     | 1         | Cumulative Cigarettes (15 Years)                    |
| Brain and nervous system cancer | Male   | 1 to 4    | 80 plus | Global     | 1         | Red Meat (kcal per capita)                          |
| Brain and nervous system cancer | Male   | 1 to 4    | 80 plus | Global     | 1         | Smoking Prevalence                                  |
| Brain and nervous system cancer | Male   | 1 to 4    | 80 plus | Global     | 1         | Sociodemographic Status                             |
| Brain and nervous system cancer | Male   | 1 to 4    | 80 plus | Global     | 1         | Systolic Blood Pressure (mmHg)                      |
| Brain and nervous system cancer | Male   | 1 to 4    | 80 plus | Data Rich  | -1        | Education (years per capita)                        |
| Brain and nervous system cancer | Male   | 1 to 4    | 80 plus | Data Rich  | -1        | Fruits (kcal per capita)                            |
| Brain and nervous system cancer | Male   | 1 to 4    | 80 plus | Data Rich  | -1        | Health System Access 2 (unitless)                   |
| Brain and nervous system cancer | Male   | 1 to 4    | 80 plus | Data Rich  | -1        | LDI (IS per capita)                                 |
| Brain and nervous system cancer | Male   | 1 to 4    | 80 plus | Data Rich  | -1        | Vegetables (kcal per capita)                        |
| Brain and nervous system cancer | Male   | 1 to 4    | 80 plus | Data Rich  | 1         | Alcohol (litres per capita)                         |
| Brain and nervous system cancer | Male   | 1 to 4    | 80 plus | Data Rich  | 1         | Animal Fats (kcal per capita)                       |
| Brain and nervous system cancer | Male   | 1 to 4    | 80 plus | Data Rich  | 1         | Cholesterol (total, mean per capita)                |
| Brain and nervous system cancer | Male   | 1 to 4    | 80 plus | Data Rich  | 1         | Cumulative Cigarettes (10 Years)                    |

**Appendix Table 10: CODEm covariates used, level of covariate, and expected direction of covariate by cause, sex, and age**

| Cause                           | Sex    | Age start | Age end | Model type | Direction | Covariate                                      |
|---------------------------------|--------|-----------|---------|------------|-----------|------------------------------------------------|
| Brain and nervous system cancer | Male   | 1 to 4    | 80 plus | Data Rich  | 1         | Cumulative Cigarettes (15 Years)               |
| Brain and nervous system cancer | Male   | 1 to 4    | 80 plus | Data Rich  | 1         | Red Meat (kcal per capita)                     |
| Brain and nervous system cancer | Male   | 1 to 4    | 80 plus | Data Rich  | 1         | Smoking Prevalence                             |
| Brain and nervous system cancer | Male   | 1 to 4    | 80 plus | Data Rich  | 1         | Sociodemographic Status                        |
| Brain and nervous system cancer | Male   | 1 to 4    | 80 plus | Data Rich  | 1         | Systolic Blood Pressure (mmHg)                 |
| Brain and nervous system cancer | Female | 1 to 4    | 80 plus | Global     | -1        | Education (years per capita)                   |
| Brain and nervous system cancer | Female | 1 to 4    | 80 plus | Global     | -1        | Fruits (kcal per capita)                       |
| Brain and nervous system cancer | Female | 1 to 4    | 80 plus | Global     | -1        | Health System Access 2 (unitless)              |
| Brain and nervous system cancer | Female | 1 to 4    | 80 plus | Global     | -1        | LDI (IS per capita)                            |
| Brain and nervous system cancer | Female | 1 to 4    | 80 plus | Global     | -1        | Vegetables (kcal per capita)                   |
| Brain and nervous system cancer | Female | 1 to 4    | 80 plus | Global     | 1         | Alcohol (litres per capita)                    |
| Brain and nervous system cancer | Female | 1 to 4    | 80 plus | Global     | 1         | Animal Fats (kcal per capita)                  |
| Brain and nervous system cancer | Female | 1 to 4    | 80 plus | Global     | 1         | Cholesterol (total, mean per capita)           |
| Brain and nervous system cancer | Female | 1 to 4    | 80 plus | Global     | 1         | Cumulative Cigarettes (10 Years)               |
| Brain and nervous system cancer | Female | 1 to 4    | 80 plus | Global     | 1         | Cumulative Cigarettes (15 Years)               |
| Brain and nervous system cancer | Female | 1 to 4    | 80 plus | Global     | 1         | Red Meat (kcal per capita)                     |
| Brain and nervous system cancer | Female | 1 to 4    | 80 plus | Global     | 1         | Smoking Prevalence                             |
| Brain and nervous system cancer | Female | 1 to 4    | 80 plus | Global     | 1         | Sociodemographic Status                        |
| Brain and nervous system cancer | Female | 1 to 4    | 80 plus | Global     | 1         | Systolic Blood Pressure (mmHg)                 |
| Brain and nervous system cancer | Female | 1 to 4    | 80 plus | Data Rich  | -1        | Education (years per capita)                   |
| Brain and nervous system cancer | Female | 1 to 4    | 80 plus | Data Rich  | -1        | Fruits (kcal per capita)                       |
| Brain and nervous system cancer | Female | 1 to 4    | 80 plus | Data Rich  | -1        | Health System Access 2 (unitless)              |
| Brain and nervous system cancer | Female | 1 to 4    | 80 plus | Data Rich  | -1        | LDI (IS per capita)                            |
| Brain and nervous system cancer | Female | 1 to 4    | 80 plus | Data Rich  | -1        | Vegetables (kcal per capita)                   |
| Brain and nervous system cancer | Female | 1 to 4    | 80 plus | Data Rich  | 1         | Alcohol (litres per capita)                    |
| Brain and nervous system cancer | Female | 1 to 4    | 80 plus | Data Rich  | 1         | Animal Fats (kcal per capita)                  |
| Brain and nervous system cancer | Female | 1 to 4    | 80 plus | Data Rich  | 1         | Cholesterol (total, mean per capita)           |
| Brain and nervous system cancer | Female | 1 to 4    | 80 plus | Data Rich  | 1         | Cumulative Cigarettes (10 Years)               |
| Brain and nervous system cancer | Female | 1 to 4    | 80 plus | Data Rich  | 1         | Cumulative Cigarettes (15 Years)               |
| Brain and nervous system cancer | Female | 1 to 4    | 80 plus | Data Rich  | 1         | Red Meat (kcal per capita)                     |
| Brain and nervous system cancer | Female | 1 to 4    | 80 plus | Data Rich  | 1         | Smoking Prevalence                             |
| Brain and nervous system cancer | Female | 1 to 4    | 80 plus | Data Rich  | 1         | Sociodemographic Status                        |
| Brain and nervous system cancer | Female | 1 to 4    | 80 plus | Data Rich  | 1         | Systolic Blood Pressure (mmHg)                 |
| Thyroid cancer                  | Male   | 10 to 14  | 80 plus | Global     | -1        | Education (years per capita)                   |
| Thyroid cancer                  | Male   | 10 to 14  | 80 plus | Global     | -1        | Fruits (kcal per capita)                       |
| Thyroid cancer                  | Male   | 10 to 14  | 80 plus | Global     | -1        | Improved Water Source (proportion with access) |
| Thyroid cancer                  | Male   | 10 to 14  | 80 plus | Global     | -1        | LDI (IS per capita)                            |
| Thyroid cancer                  | Male   | 10 to 14  | 80 plus | Global     | -1        | Sanitation (proportion with access)            |
| Thyroid cancer                  | Male   | 10 to 14  | 80 plus | Global     | -1        | Vegetables (kcal per capita)                   |
| Thyroid cancer                  | Male   | 10 to 14  | 80 plus | Global     | 0         | Sociodemographic Status                        |
| Thyroid cancer                  | Male   | 10 to 14  | 80 plus | Global     | 1         | Alcohol (litres per capita)                    |
| Thyroid cancer                  | Male   | 10 to 14  | 80 plus | Global     | 1         | Log-transformed SEV scalar: Thyroid C          |
| Thyroid cancer                  | Male   | 10 to 14  | 80 plus | Global     | 1         | Mean BMI                                       |
| Thyroid cancer                  | Male   | 10 to 14  | 80 plus | Global     | 1         | Red Meat (kcal per capita)                     |

**Appendix Table 10: CODEm covariates used, level of covariate, and expected direction of covariate by cause, sex, and age**

| Cause          | Sex    | Age start | Age end | Model type | Direction | Covariate                                      |
|----------------|--------|-----------|---------|------------|-----------|------------------------------------------------|
| Thyroid cancer | Male   | 10 to 14  | 80 plus | Global     | 2         | Smoking Prevalence                             |
| Thyroid cancer | Male   | 10 to 14  | 80 plus | Global     | 2         | Tobacco (cigarettes per capita)                |
| Thyroid cancer | Male   | 10 to 14  | 80 plus | Data Rich  | -1        | Education (years per capita)                   |
| Thyroid cancer | Male   | 10 to 14  | 80 plus | Data Rich  | -1        | Fruits (kcal per capita)                       |
| Thyroid cancer | Male   | 10 to 14  | 80 plus | Data Rich  | -1        | Improved Water Source (proportion with access) |
| Thyroid cancer | Male   | 10 to 14  | 80 plus | Data Rich  | -1        | LDI (IS per capita)                            |
| Thyroid cancer | Male   | 10 to 14  | 80 plus | Data Rich  | -1        | Sanitation (proportion with access)            |
| Thyroid cancer | Male   | 10 to 14  | 80 plus | Data Rich  | -1        | Vegetables (kcal per capita)                   |
| Thyroid cancer | Male   | 10 to 14  | 80 plus | Data Rich  | 0         | Sociodemographic Status                        |
| Thyroid cancer | Male   | 10 to 14  | 80 plus | Data Rich  | 1         | Alcohol (litres per capita)                    |
| Thyroid cancer | Male   | 10 to 14  | 80 plus | Data Rich  | 1         | Log-transformed SEV scalar: Thyroid C          |
| Thyroid cancer | Male   | 10 to 14  | 80 plus | Data Rich  | 1         | Mean BMI                                       |
| Thyroid cancer | Male   | 10 to 14  | 80 plus | Data Rich  | 1         | Red Meat (kcal per capita)                     |
| Thyroid cancer | Male   | 10 to 14  | 80 plus | Data Rich  | 2         | Smoking Prevalence                             |
| Thyroid cancer | Male   | 10 to 14  | 80 plus | Data Rich  | 2         | Tobacco (cigarettes per capita)                |
| Thyroid cancer | Female | 10 to 14  | 80 plus | Global     | -1        | Education (years per capita)                   |
| Thyroid cancer | Female | 10 to 14  | 80 plus | Global     | -1        | Fruits (kcal per capita)                       |
| Thyroid cancer | Female | 10 to 14  | 80 plus | Global     | -1        | Improved Water Source (proportion with access) |
| Thyroid cancer | Female | 10 to 14  | 80 plus | Global     | -1        | LDI (IS per capita)                            |
| Thyroid cancer | Female | 10 to 14  | 80 plus | Global     | -1        | Sanitation (proportion with access)            |
| Thyroid cancer | Female | 10 to 14  | 80 plus | Global     | -1        | Vegetables (kcal per capita)                   |
| Thyroid cancer | Female | 10 to 14  | 80 plus | Global     | 0         | Sociodemographic Status                        |
| Thyroid cancer | Female | 10 to 14  | 80 plus | Global     | 1         | Alcohol (litres per capita)                    |
| Thyroid cancer | Female | 10 to 14  | 80 plus | Global     | 1         | Log-transformed SEV scalar: Thyroid C          |
| Thyroid cancer | Female | 10 to 14  | 80 plus | Global     | 1         | Mean BMI                                       |
| Thyroid cancer | Female | 10 to 14  | 80 plus | Global     | 1         | Red Meat (kcal per capita)                     |
| Thyroid cancer | Female | 10 to 14  | 80 plus | Global     | 2         | Smoking Prevalence                             |
| Thyroid cancer | Female | 10 to 14  | 80 plus | Global     | 2         | Tobacco (cigarettes per capita)                |
| Thyroid cancer | Female | 10 to 14  | 80 plus | Data Rich  | -1        | Education (years per capita)                   |
| Thyroid cancer | Female | 10 to 14  | 80 plus | Data Rich  | -1        | Fruits (kcal per capita)                       |
| Thyroid cancer | Female | 10 to 14  | 80 plus | Data Rich  | -1        | Improved Water Source (proportion with access) |
| Thyroid cancer | Female | 10 to 14  | 80 plus | Data Rich  | -1        | LDI (IS per capita)                            |
| Thyroid cancer | Female | 10 to 14  | 80 plus | Data Rich  | -1        | Sanitation (proportion with access)            |
| Thyroid cancer | Female | 10 to 14  | 80 plus | Data Rich  | -1        | Vegetables (kcal per capita)                   |
| Thyroid cancer | Female | 10 to 14  | 80 plus | Data Rich  | 0         | Sociodemographic Status                        |
| Thyroid cancer | Female | 10 to 14  | 80 plus | Data Rich  | 1         | Alcohol (litres per capita)                    |
| Thyroid cancer | Female | 10 to 14  | 80 plus | Data Rich  | 1         | Log-transformed SEV scalar: Thyroid C          |
| Thyroid cancer | Female | 10 to 14  | 80 plus | Data Rich  | 1         | Mean BMI                                       |
| Thyroid cancer | Female | 10 to 14  | 80 plus | Data Rich  | 1         | Red Meat (kcal per capita)                     |
| Thyroid cancer | Female | 10 to 14  | 80 plus | Data Rich  | 2         | Smoking Prevalence                             |
| Thyroid cancer | Female | 10 to 14  | 80 plus | Data Rich  | 2         | Tobacco (cigarettes per capita)                |
| Mesothelioma   | Male   | 15 to 19  | 80 plus | Global     | -1        | Education (years per capita)                   |
| Mesothelioma   | Male   | 15 to 19  | 80 plus | Global     | -1        | Health System Access 2 (unitless)              |
| Mesothelioma   | Male   | 15 to 19  | 80 plus | Global     | -1        | LDI (IS per capita)                            |

**Appendix Table 10: CODEm covariates used, level of covariate, and expected direction of covariate by cause, sex, and age**

| Cause        | Sex    | Age start | Age end | Model type | Direction | Covariate                                           |
|--------------|--------|-----------|---------|------------|-----------|-----------------------------------------------------|
| Mesothelioma | Male   | 15 to 19  | 80 plus | Global     | 0         | Sociodemographic Status                             |
| Mesothelioma | Male   | 15 to 19  | 80 plus | Global     | 1         | Asbestos production (binary)                        |
| Mesothelioma | Male   | 15 to 19  | 80 plus | Global     | 1         | Asbestos production (kg) per capita                 |
| Mesothelioma | Male   | 15 to 19  | 80 plus | Global     | 1         | Cumulative Cigarettes (5 Years)                     |
| Mesothelioma | Male   | 15 to 19  | 80 plus | Global     | 1         | Elevation 500 to 1500m (proportion)                 |
| Mesothelioma | Male   | 15 to 19  | 80 plus | Global     | 1         | Elevation Over 1500m (proportion)                   |
| Mesothelioma | Male   | 15 to 19  | 80 plus | Global     | 1         | Gold production (binary)                            |
| Mesothelioma | Male   | 15 to 19  | 80 plus | Global     | 1         | Gold production (kg) per capita                     |
| Mesothelioma | Male   | 15 to 19  | 80 plus | Global     | 1         | Indoor Air Pollution (Coal Cooking)                 |
| Mesothelioma | Male   | 15 to 19  | 80 plus | Global     | 1         | Log-transformed SEV scalar: Mesothel                |
| Mesothelioma | Male   | 15 to 19  | 80 plus | Global     | 1         | Population Density (over 1000 ppl/sqkm, proportion) |
| Mesothelioma | Male   | 15 to 19  | 80 plus | Global     | 1         | Population Over 65 (proportion)                     |
| Mesothelioma | Male   | 15 to 19  | 80 plus | Global     | 1         | Smoking Prevalence                                  |
| Mesothelioma | Male   | 15 to 19  | 80 plus | Data Rich  | -1        | Education (years per capita)                        |
| Mesothelioma | Male   | 15 to 19  | 80 plus | Data Rich  | -1        | Health System Access 2 (unitless)                   |
| Mesothelioma | Male   | 15 to 19  | 80 plus | Data Rich  | -1        | LDI (IS per capita)                                 |
| Mesothelioma | Male   | 15 to 19  | 80 plus | Data Rich  | 0         | Sociodemographic Status                             |
| Mesothelioma | Male   | 15 to 19  | 80 plus | Data Rich  | 1         | Asbestos production (binary)                        |
| Mesothelioma | Male   | 15 to 19  | 80 plus | Data Rich  | 1         | Asbestos production (kg) per capita                 |
| Mesothelioma | Male   | 15 to 19  | 80 plus | Data Rich  | 1         | Cumulative Cigarettes (5 Years)                     |
| Mesothelioma | Male   | 15 to 19  | 80 plus | Data Rich  | 1         | Elevation 500 to 1500m (proportion)                 |
| Mesothelioma | Male   | 15 to 19  | 80 plus | Data Rich  | 1         | Elevation Over 1500m (proportion)                   |
| Mesothelioma | Male   | 15 to 19  | 80 plus | Data Rich  | 1         | Gold production (binary)                            |
| Mesothelioma | Male   | 15 to 19  | 80 plus | Data Rich  | 1         | Gold production (kg) per capita                     |
| Mesothelioma | Male   | 15 to 19  | 80 plus | Data Rich  | 1         | Indoor Air Pollution (Coal Cooking)                 |
| Mesothelioma | Male   | 15 to 19  | 80 plus | Data Rich  | 1         | Log-transformed SEV scalar: Mesothel                |
| Mesothelioma | Male   | 15 to 19  | 80 plus | Data Rich  | 1         | Population Density (over 1000 ppl/sqkm, proportion) |
| Mesothelioma | Male   | 15 to 19  | 80 plus | Data Rich  | 1         | Population Over 65 (proportion)                     |
| Mesothelioma | Male   | 15 to 19  | 80 plus | Data Rich  | 1         | Smoking Prevalence                                  |
| Mesothelioma | Female | 15 to 19  | 80 plus | Global     | -1        | Education (years per capita)                        |
| Mesothelioma | Female | 15 to 19  | 80 plus | Global     | -1        | Health System Access 2 (unitless)                   |
| Mesothelioma | Female | 15 to 19  | 80 plus | Global     | -1        | LDI (IS per capita)                                 |
| Mesothelioma | Female | 15 to 19  | 80 plus | Global     | 0         | Sociodemographic Status                             |
| Mesothelioma | Female | 15 to 19  | 80 plus | Global     | 1         | Asbestos production (binary)                        |
| Mesothelioma | Female | 15 to 19  | 80 plus | Global     | 1         | Asbestos production (kg) per capita                 |
| Mesothelioma | Female | 15 to 19  | 80 plus | Global     | 1         | Cumulative Cigarettes (5 Years)                     |
| Mesothelioma | Female | 15 to 19  | 80 plus | Global     | 1         | Elevation 500 to 1500m (proportion)                 |
| Mesothelioma | Female | 15 to 19  | 80 plus | Global     | 1         | Elevation Over 1500m (proportion)                   |
| Mesothelioma | Female | 15 to 19  | 80 plus | Global     | 1         | Gold production (binary)                            |
| Mesothelioma | Female | 15 to 19  | 80 plus | Global     | 1         | Gold production (kg) per capita                     |
| Mesothelioma | Female | 15 to 19  | 80 plus | Global     | 1         | Indoor Air Pollution (Coal Cooking)                 |
| Mesothelioma | Female | 15 to 19  | 80 plus | Global     | 1         | Log-transformed SEV scalar: Mesothel                |
| Mesothelioma | Female | 15 to 19  | 80 plus | Global     | 1         | Population Density (over 1000 ppl/sqkm, proportion) |
| Mesothelioma | Female | 15 to 19  | 80 plus | Global     | 1         | Population Over 65 (proportion)                     |

**Appendix Table 10: CODEm covariates used, level of covariate, and expected direction of covariate by cause, sex, and age**

| Cause            | Sex    | Age start     | Age end | Model type | Direction | Covariate                                           |
|------------------|--------|---------------|---------|------------|-----------|-----------------------------------------------------|
| Mesothelioma     | Female | 15 to 19      | 80 plus | Global     | 1         | Smoking Prevalence                                  |
| Mesothelioma     | Female | 15 to 19      | 80 plus | Data Rich  | -1        | Education (years per capita)                        |
| Mesothelioma     | Female | 15 to 19      | 80 plus | Data Rich  | -1        | Health System Access 2 (unitless)                   |
| Mesothelioma     | Female | 15 to 19      | 80 plus | Data Rich  | -1        | LDI (IS per capita)                                 |
| Mesothelioma     | Female | 15 to 19      | 80 plus | Data Rich  | 0         | Sociodemographic Status                             |
| Mesothelioma     | Female | 15 to 19      | 80 plus | Data Rich  | 1         | Asbestos production (binary)                        |
| Mesothelioma     | Female | 15 to 19      | 80 plus | Data Rich  | 1         | Asbestos production (kg) per capita                 |
| Mesothelioma     | Female | 15 to 19      | 80 plus | Data Rich  | 1         | Cumulative Cigarettes (5 Years)                     |
| Mesothelioma     | Female | 15 to 19      | 80 plus | Data Rich  | 1         | Elevation 500 to 1500m (proportion)                 |
| Mesothelioma     | Female | 15 to 19      | 80 plus | Data Rich  | 1         | Elevation Over 1500m (proportion)                   |
| Mesothelioma     | Female | 15 to 19      | 80 plus | Data Rich  | 1         | Gold production (binary)                            |
| Mesothelioma     | Female | 15 to 19      | 80 plus | Data Rich  | 1         | Gold production (kg) per capita                     |
| Mesothelioma     | Female | 15 to 19      | 80 plus | Data Rich  | 1         | Indoor Air Pollution (Coal Cooking)                 |
| Mesothelioma     | Female | 15 to 19      | 80 plus | Data Rich  | 1         | Log-transformed SEV scalar: Mesothel                |
| Mesothelioma     | Female | 15 to 19      | 80 plus | Data Rich  | 1         | Population Density (over 1000 ppl/sqkm, proportion) |
| Mesothelioma     | Female | 15 to 19      | 80 plus | Data Rich  | 1         | Population Over 65 (proportion)                     |
| Mesothelioma     | Female | 15 to 19      | 80 plus | Data Rich  | 1         | Smoking Prevalence                                  |
| Hodgkin lymphoma | Male   | Post Neonatal | 80 plus | Global     | -1        | Education (years per capita)                        |
| Hodgkin lymphoma | Male   | Post Neonatal | 80 plus | Global     | -1        | Health System Access 2 (unitless)                   |
| Hodgkin lymphoma | Male   | Post Neonatal | 80 plus | Global     | -1        | LDI (IS per capita)                                 |
| Hodgkin lymphoma | Male   | Post Neonatal | 80 plus | Global     | 0         | Sociodemographic Status                             |
| Hodgkin lymphoma | Male   | Post Neonatal | 80 plus | Global     | 1         | Latitude 15 to 30 (proportion)                      |
| Hodgkin lymphoma | Male   | Post Neonatal | 80 plus | Global     | 1         | Latitude 30 to 45 (proportion)                      |
| Hodgkin lymphoma | Male   | Post Neonatal | 80 plus | Global     | 1         | Latitude Over 45 (proportion)                       |
| Hodgkin lymphoma | Male   | Post Neonatal | 80 plus | Global     | 1         | Latitude Under 15 (proportion)                      |
| Hodgkin lymphoma | Male   | Post Neonatal | 80 plus | Data Rich  | -1        | Education (years per capita)                        |
| Hodgkin lymphoma | Male   | Post Neonatal | 80 plus | Data Rich  | -1        | Health System Access 2 (unitless)                   |
| Hodgkin lymphoma | Male   | Post Neonatal | 80 plus | Data Rich  | -1        | LDI (IS per capita)                                 |
| Hodgkin lymphoma | Male   | Post Neonatal | 80 plus | Data Rich  | 0         | Sociodemographic Status                             |
| Hodgkin lymphoma | Male   | Post Neonatal | 80 plus | Data Rich  | 1         | Latitude 15 to 30 (proportion)                      |
| Hodgkin lymphoma | Male   | Post Neonatal | 80 plus | Data Rich  | 1         | Latitude 30 to 45 (proportion)                      |
| Hodgkin lymphoma | Male   | Post Neonatal | 80 plus | Data Rich  | 1         | Latitude Over 45 (proportion)                       |
| Hodgkin lymphoma | Male   | Post Neonatal | 80 plus | Data Rich  | 1         | Latitude Under 15 (proportion)                      |
| Hodgkin lymphoma | Female | Post Neonatal | 80 plus | Global     | -1        | Education (years per capita)                        |
| Hodgkin lymphoma | Female | Post Neonatal | 80 plus | Global     | -1        | Health System Access 2 (unitless)                   |
| Hodgkin lymphoma | Female | Post Neonatal | 80 plus | Global     | -1        | LDI (IS per capita)                                 |
| Hodgkin lymphoma | Female | Post Neonatal | 80 plus | Global     | -1        | Latitude 30 to 45 (proportion)                      |
| Hodgkin lymphoma | Female | Post Neonatal | 80 plus | Global     | -1        | Latitude Over 45 (proportion)                       |
| Hodgkin lymphoma | Female | Post Neonatal | 80 plus | Global     | 0         | Sociodemographic Status                             |
| Hodgkin lymphoma | Female | Post Neonatal | 80 plus | Global     | 1         | Latitude 15 to 30 (proportion)                      |
| Hodgkin lymphoma | Female | Post Neonatal | 80 plus | Global     | 1         | Latitude Under 15 (proportion)                      |
| Hodgkin lymphoma | Female | Post Neonatal | 80 plus | Data Rich  | -1        | Education (years per capita)                        |
| Hodgkin lymphoma | Female | Post Neonatal | 80 plus | Data Rich  | -1        | Health System Access 2 (unitless)                   |
| Hodgkin lymphoma | Female | Post Neonatal | 80 plus | Data Rich  | -1        | LDI (IS per capita)                                 |

**Appendix Table 10: CODEm covariates used, level of covariate, and expected direction of covariate by cause, sex, and age**

| Cause                | Sex    | Age start     | Age end | Model type | Direction | Covariate                                      |
|----------------------|--------|---------------|---------|------------|-----------|------------------------------------------------|
| Hodgkin lymphoma     | Female | Post Neonatal | 80 plus | Data Rich  | -1        | Latitude 30 to 45 (proportion)                 |
| Hodgkin lymphoma     | Female | Post Neonatal | 80 plus | Data Rich  | -1        | Latitude Over 45 (proportion)                  |
| Hodgkin lymphoma     | Female | Post Neonatal | 80 plus | Data Rich  | 0         | Sociodemographic Status                        |
| Hodgkin lymphoma     | Female | Post Neonatal | 80 plus | Data Rich  | 1         | Latitude 15 to 30 (proportion)                 |
| Hodgkin lymphoma     | Female | Post Neonatal | 80 plus | Data Rich  | 1         | Latitude Under 15 (proportion)                 |
| Non-Hodgkin lymphoma | Male   | Post Neonatal | 80 plus | Global     | -1        | Health System Access 2 (unitless)              |
| Non-Hodgkin lymphoma | Male   | Post Neonatal | 80 plus | Global     | -1        | LDI (IS per capita)                            |
| Non-Hodgkin lymphoma | Male   | Post Neonatal | 80 plus | Global     | 0         | Sociodemographic Status                        |
| Non-Hodgkin lymphoma | Male   | Post Neonatal | 80 plus | Global     | 0         | Total Fertility Rate                           |
| Non-Hodgkin lymphoma | Male   | Post Neonatal | 80 plus | Global     | 1         | Alcohol (litres per capita)                    |
| Non-Hodgkin lymphoma | Male   | Post Neonatal | 80 plus | Global     | 1         | Cumulative Cigarettes (10 Years)               |
| Non-Hodgkin lymphoma | Male   | Post Neonatal | 80 plus | Global     | 1         | Smoking Prevalence                             |
| Non-Hodgkin lymphoma | Male   | Post Neonatal | 80 plus | Data Rich  | -1        | Health System Access 2 (unitless)              |
| Non-Hodgkin lymphoma | Male   | Post Neonatal | 80 plus | Data Rich  | -1        | LDI (IS per capita)                            |
| Non-Hodgkin lymphoma | Male   | Post Neonatal | 80 plus | Data Rich  | 0         | Sociodemographic Status                        |
| Non-Hodgkin lymphoma | Male   | Post Neonatal | 80 plus | Data Rich  | 0         | Total Fertility Rate                           |
| Non-Hodgkin lymphoma | Male   | Post Neonatal | 80 plus | Data Rich  | 1         | Alcohol (litres per capita)                    |
| Non-Hodgkin lymphoma | Male   | Post Neonatal | 80 plus | Data Rich  | 1         | Cumulative Cigarettes (10 Years)               |
| Non-Hodgkin lymphoma | Male   | Post Neonatal | 80 plus | Data Rich  | 1         | Smoking Prevalence                             |
| Non-Hodgkin lymphoma | Female | Post Neonatal | 80 plus | Global     | -1        | Health System Access 2 (unitless)              |
| Non-Hodgkin lymphoma | Female | Post Neonatal | 80 plus | Global     | -1        | LDI (IS per capita)                            |
| Non-Hodgkin lymphoma | Female | Post Neonatal | 80 plus | Global     | 0         | Sociodemographic Status                        |
| Non-Hodgkin lymphoma | Female | Post Neonatal | 80 plus | Global     | 0         | Total Fertility Rate                           |
| Non-Hodgkin lymphoma | Female | Post Neonatal | 80 plus | Global     | 1         | Alcohol (litres per capita)                    |
| Non-Hodgkin lymphoma | Female | Post Neonatal | 80 plus | Global     | 1         | Cumulative Cigarettes (10 Years)               |
| Non-Hodgkin lymphoma | Female | Post Neonatal | 80 plus | Global     | 1         | Smoking Prevalence                             |
| Non-Hodgkin lymphoma | Female | Post Neonatal | 80 plus | Data Rich  | -1        | Health System Access 2 (unitless)              |
| Non-Hodgkin lymphoma | Female | Post Neonatal | 80 plus | Data Rich  | -1        | LDI (IS per capita)                            |
| Non-Hodgkin lymphoma | Female | Post Neonatal | 80 plus | Data Rich  | 0         | Sociodemographic Status                        |
| Non-Hodgkin lymphoma | Female | Post Neonatal | 80 plus | Data Rich  | 0         | Total Fertility Rate                           |
| Non-Hodgkin lymphoma | Female | Post Neonatal | 80 plus | Data Rich  | 1         | Alcohol (litres per capita)                    |
| Non-Hodgkin lymphoma | Female | Post Neonatal | 80 plus | Data Rich  | 1         | Cumulative Cigarettes (10 Years)               |
| Non-Hodgkin lymphoma | Female | Post Neonatal | 80 plus | Data Rich  | 1         | Smoking Prevalence                             |
| Multiple myeloma     | Male   | 15 to 19      | 80 plus | Global     | -1        | Education (years per capita)                   |
| Multiple myeloma     | Male   | 15 to 19      | 80 plus | Global     | -1        | Fruits (kcal per capita)                       |
| Multiple myeloma     | Male   | 15 to 19      | 80 plus | Global     | -1        | Improved Water Source (proportion with access) |
| Multiple myeloma     | Male   | 15 to 19      | 80 plus | Global     | -1        | LDI (IS per capita)                            |
| Multiple myeloma     | Male   | 15 to 19      | 80 plus | Global     | -1        | Sanitation (proportion with access)            |
| Multiple myeloma     | Male   | 15 to 19      | 80 plus | Global     | -1        | Vegetables (kcal per capita)                   |
| Multiple myeloma     | Male   | 15 to 19      | 80 plus | Global     | 0         | Sociodemographic Status                        |
| Multiple myeloma     | Male   | 15 to 19      | 80 plus | Global     | 1         | Alcohol (litres per capita)                    |
| Multiple myeloma     | Male   | 15 to 19      | 80 plus | Global     | 1         | Mean BMI                                       |
| Multiple myeloma     | Male   | 15 to 19      | 80 plus | Global     | 1         | Red Meat (kcal per capita)                     |
| Multiple myeloma     | Male   | 15 to 19      | 80 plus | Global     | 1         | Smoking Prevalence                             |



**Appendix Table 10: CODEm covariates used, level of covariate, and expected direction of covariate by cause, sex, and age**

| Cause            | Sex    | Age start     | Age end | Model type | Direction | Covariate                                      |
|------------------|--------|---------------|---------|------------|-----------|------------------------------------------------|
| Multiple myeloma | Male   | 15 to 19      | 80 plus | Global     | 1         | Tobacco (cigarettes per capita)                |
| Multiple myeloma | Male   | 15 to 19      | 80 plus | Data Rich  | -1        | Education (years per capita)                   |
| Multiple myeloma | Male   | 15 to 19      | 80 plus | Data Rich  | -1        | Fruits (kcal per capita)                       |
| Multiple myeloma | Male   | 15 to 19      | 80 plus | Data Rich  | -1        | Improved Water Source (proportion with access) |
| Multiple myeloma | Male   | 15 to 19      | 80 plus | Data Rich  | -1        | LDI (IS per capita)                            |
| Multiple myeloma | Male   | 15 to 19      | 80 plus | Data Rich  | -1        | Sanitation (proportion with access)            |
| Multiple myeloma | Male   | 15 to 19      | 80 plus | Data Rich  | -1        | Vegetables (kcal per capita)                   |
| Multiple myeloma | Male   | 15 to 19      | 80 plus | Data Rich  | 0         | Sociodemographic Status                        |
| Multiple myeloma | Male   | 15 to 19      | 80 plus | Data Rich  | 1         | Alcohol (litres per capita)                    |
| Multiple myeloma | Male   | 15 to 19      | 80 plus | Data Rich  | 1         | Mean BMI                                       |
| Multiple myeloma | Male   | 15 to 19      | 80 plus | Data Rich  | 1         | Red Meat (kcal per capita)                     |
| Multiple myeloma | Male   | 15 to 19      | 80 plus | Data Rich  | 1         | Smoking Prevalence                             |
| Multiple myeloma | Male   | 15 to 19      | 80 plus | Data Rich  | 1         | Tobacco (cigarettes per capita)                |
| Multiple myeloma | Female | 15 to 19      | 80 plus | Global     | -1        | Education (years per capita)                   |
| Multiple myeloma | Female | 15 to 19      | 80 plus | Global     | -1        | Fruits (kcal per capita)                       |
| Multiple myeloma | Female | 15 to 19      | 80 plus | Global     | -1        | Improved Water Source (proportion with access) |
| Multiple myeloma | Female | 15 to 19      | 80 plus | Global     | -1        | LDI (IS per capita)                            |
| Multiple myeloma | Female | 15 to 19      | 80 plus | Global     | -1        | Sanitation (proportion with access)            |
| Multiple myeloma | Female | 15 to 19      | 80 plus | Global     | -1        | Vegetables (kcal per capita)                   |
| Multiple myeloma | Female | 15 to 19      | 80 plus | Global     | 0         | Sociodemographic Status                        |
| Multiple myeloma | Female | 15 to 19      | 80 plus | Global     | 1         | Alcohol (litres per capita)                    |
| Multiple myeloma | Female | 15 to 19      | 80 plus | Global     | 1         | Mean BMI                                       |
| Multiple myeloma | Female | 15 to 19      | 80 plus | Global     | 1         | Red Meat (kcal per capita)                     |
| Multiple myeloma | Female | 15 to 19      | 80 plus | Global     | 1         | Smoking Prevalence                             |
| Multiple myeloma | Female | 15 to 19      | 80 plus | Global     | 1         | Tobacco (cigarettes per capita)                |
| Multiple myeloma | Female | 15 to 19      | 80 plus | Data Rich  | -1        | Education (years per capita)                   |
| Multiple myeloma | Female | 15 to 19      | 80 plus | Data Rich  | -1        | Fruits (kcal per capita)                       |
| Multiple myeloma | Female | 15 to 19      | 80 plus | Data Rich  | -1        | Improved Water Source (proportion with access) |
| Multiple myeloma | Female | 15 to 19      | 80 plus | Data Rich  | -1        | LDI (IS per capita)                            |
| Multiple myeloma | Female | 15 to 19      | 80 plus | Data Rich  | -1        | Sanitation (proportion with access)            |
| Multiple myeloma | Female | 15 to 19      | 80 plus | Data Rich  | -1        | Vegetables (kcal per capita)                   |
| Multiple myeloma | Female | 15 to 19      | 80 plus | Data Rich  | 0         | Sociodemographic Status                        |
| Multiple myeloma | Female | 15 to 19      | 80 plus | Data Rich  | 1         | Alcohol (litres per capita)                    |
| Multiple myeloma | Female | 15 to 19      | 80 plus | Data Rich  | 1         | Mean BMI                                       |
| Multiple myeloma | Female | 15 to 19      | 80 plus | Data Rich  | 1         | Red Meat (kcal per capita)                     |
| Multiple myeloma | Female | 15 to 19      | 80 plus | Data Rich  | 1         | Smoking Prevalence                             |
| Multiple myeloma | Female | 15 to 19      | 80 plus | Data Rich  | 1         | Tobacco (cigarettes per capita)                |
| Leukemia         | Male   | Post Neonatal | 80 plus | Global     | -1        | Education (years per capita)                   |
| Leukemia         | Male   | Post Neonatal | 80 plus | Global     | -1        | Health System Access 2 (unitless)              |
| Leukemia         | Male   | Post Neonatal | 80 plus | Global     | -1        | LDI (IS per capita)                            |
| Leukemia         | Male   | Post Neonatal | 80 plus | Global     | 1         | Alcohol (litres per capita)                    |
| Leukemia         | Male   | Post Neonatal | 80 plus | Global     | 1         | Cumulative Cigarettes (10 Years)               |
| Leukemia         | Male   | Post Neonatal | 80 plus | Global     | 1         | Cumulative Cigarettes (15 Years)               |
| Leukemia         | Male   | Post Neonatal | 80 plus | Global     | 1         | Cumulative Cigarettes (5 Years)                |

**Appendix Table 10: CODEm covariates used, level of covariate, and expected direction of covariate by cause, sex, and age**

| Cause                   | Sex    | Age start     | Age end | Model type | Direction | Covariate                            |
|-------------------------|--------|---------------|---------|------------|-----------|--------------------------------------|
| Leukemia                | Male   | Post Neonatal | 80 plus | Global     | 1         | Log-transformed SEV scalar: Leukemia |
| Leukemia                | Male   | Post Neonatal | 80 plus | Global     | 1         | Smoking Prevalence                   |
| Leukemia                | Male   | Post Neonatal | 80 plus | Global     | 1         | Sociodemographic Status              |
| Leukemia                | Male   | Post Neonatal | 80 plus | Data Rich  | -1        | Education (years per capita)         |
| Leukemia                | Male   | Post Neonatal | 80 plus | Data Rich  | -1        | Health System Access 2 (unitless)    |
| Leukemia                | Male   | Post Neonatal | 80 plus | Data Rich  | -1        | LDI (IS per capita)                  |
| Leukemia                | Male   | Post Neonatal | 80 plus | Data Rich  | 1         | Alcohol (litres per capita)          |
| Leukemia                | Male   | Post Neonatal | 80 plus | Data Rich  | 1         | Cumulative Cigarettes (10 Years)     |
| Leukemia                | Male   | Post Neonatal | 80 plus | Data Rich  | 1         | Cumulative Cigarettes (15 Years)     |
| Leukemia                | Male   | Post Neonatal | 80 plus | Data Rich  | 1         | Cumulative Cigarettes (5 Years)      |
| Leukemia                | Male   | Post Neonatal | 80 plus | Data Rich  | 1         | Log-transformed SEV scalar: Leukemia |
| Leukemia                | Male   | Post Neonatal | 80 plus | Data Rich  | 1         | Smoking Prevalence                   |
| Leukemia                | Male   | Post Neonatal | 80 plus | Data Rich  | 1         | Sociodemographic Status              |
| Leukemia                | Female | Post Neonatal | 80 plus | Global     | -1        | Education (years per capita)         |
| Leukemia                | Female | Post Neonatal | 80 plus | Global     | -1        | Health System Access 2 (unitless)    |
| Leukemia                | Female | Post Neonatal | 80 plus | Global     | -1        | LDI (IS per capita)                  |
| Leukemia                | Female | Post Neonatal | 80 plus | Global     | 0         | Total Fertility Rate                 |
| Leukemia                | Female | Post Neonatal | 80 plus | Global     | 1         | Alcohol (litres per capita)          |
| Leukemia                | Female | Post Neonatal | 80 plus | Global     | 1         | Cumulative Cigarettes (10 Years)     |
| Leukemia                | Female | Post Neonatal | 80 plus | Global     | 1         | Cumulative Cigarettes (15 Years)     |
| Leukemia                | Female | Post Neonatal | 80 plus | Global     | 1         | Log-transformed SEV scalar: Leukemia |
| Leukemia                | Female | Post Neonatal | 80 plus | Global     | 1         | Smoking Prevalence                   |
| Leukemia                | Female | Post Neonatal | 80 plus | Global     | 1         | Sociodemographic Status              |
| Leukemia                | Female | Post Neonatal | 80 plus | Data Rich  | -1        | Education (years per capita)         |
| Leukemia                | Female | Post Neonatal | 80 plus | Data Rich  | -1        | Health System Access 2 (unitless)    |
| Leukemia                | Female | Post Neonatal | 80 plus | Data Rich  | -1        | LDI (IS per capita)                  |
| Leukemia                | Female | Post Neonatal | 80 plus | Data Rich  | 0         | Total Fertility Rate                 |
| Leukemia                | Female | Post Neonatal | 80 plus | Data Rich  | 1         | Alcohol (litres per capita)          |
| Leukemia                | Female | Post Neonatal | 80 plus | Data Rich  | 1         | Cumulative Cigarettes (10 Years)     |
| Leukemia                | Female | Post Neonatal | 80 plus | Data Rich  | 1         | Cumulative Cigarettes (15 Years)     |
| Leukemia                | Female | Post Neonatal | 80 plus | Data Rich  | 1         | Log-transformed SEV scalar: Leukemia |
| Leukemia                | Female | Post Neonatal | 80 plus | Data Rich  | 1         | Smoking Prevalence                   |
| Leukemia                | Female | Post Neonatal | 80 plus | Data Rich  | 1         | Sociodemographic Status              |
| Acute lymphoid leukemia | Male   | Post Neonatal | 80 plus | Global     | -1        | Education (years per capita)         |
| Acute lymphoid leukemia | Male   | Post Neonatal | 80 plus | Global     | -1        | Health System Access 2 (unitless)    |
| Acute lymphoid leukemia | Male   | Post Neonatal | 80 plus | Global     | -1        | LDI (IS per capita)                  |
| Acute lymphoid leukemia | Male   | Post Neonatal | 80 plus | Global     | 1         | Alcohol (litres per capita)          |
| Acute lymphoid leukemia | Male   | Post Neonatal | 80 plus | Global     | 1         | Cumulative Cigarettes (10 Years)     |
| Acute lymphoid leukemia | Male   | Post Neonatal | 80 plus | Global     | 1         | Cumulative Cigarettes (5 Years)      |
| Acute lymphoid leukemia | Male   | Post Neonatal | 80 plus | Global     | 1         | Log-transformed SEV scalar: Leukemia |
| Acute lymphoid leukemia | Male   | Post Neonatal | 80 plus | Global     | 1         | Smoking Prevalence                   |
| Acute lymphoid leukemia | Male   | Post Neonatal | 80 plus | Global     | 1         | Sociodemographic Status              |
| Acute lymphoid leukemia | Male   | Post Neonatal | 80 plus | Data Rich  | -1        | Education (years per capita)         |
| Acute lymphoid leukemia | Male   | Post Neonatal | 80 plus | Data Rich  | -1        | Health System Access 2 (unitless)    |

**Appendix Table 10: CODEm covariates used, level of covariate, and expected direction of covariate by cause, sex, and age**

| Cause                     | Sex    | Age start     | Age end | Model type | Direction | Covariate                            |
|---------------------------|--------|---------------|---------|------------|-----------|--------------------------------------|
| Acute lymphoid leukemia   | Male   | Post Neonatal | 80 plus | Data Rich  | -1        | LDI (IS per capita)                  |
| Acute lymphoid leukemia   | Male   | Post Neonatal | 80 plus | Data Rich  | 1         | Alcohol (litres per capita)          |
| Acute lymphoid leukemia   | Male   | Post Neonatal | 80 plus | Data Rich  | 1         | Cumulative Cigarettes (10 Years)     |
| Acute lymphoid leukemia   | Male   | Post Neonatal | 80 plus | Data Rich  | 1         | Cumulative Cigarettes (5 Years)      |
| Acute lymphoid leukemia   | Male   | Post Neonatal | 80 plus | Data Rich  | 1         | Log-transformed SEV scalar: Leukemia |
| Acute lymphoid leukemia   | Male   | Post Neonatal | 80 plus | Data Rich  | 1         | Smoking Prevalence                   |
| Acute lymphoid leukemia   | Male   | Post Neonatal | 80 plus | Data Rich  | 1         | Sociodemographic Status              |
| Acute lymphoid leukemia   | Female | Post Neonatal | 80 plus | Global     | -1        | Education (years per capita)         |
| Acute lymphoid leukemia   | Female | Post Neonatal | 80 plus | Global     | -1        | Health System Access 2 (unitless)    |
| Acute lymphoid leukemia   | Female | Post Neonatal | 80 plus | Global     | -1        | LDI (IS per capita)                  |
| Acute lymphoid leukemia   | Female | Post Neonatal | 80 plus | Global     | 1         | Alcohol (litres per capita)          |
| Acute lymphoid leukemia   | Female | Post Neonatal | 80 plus | Global     | 1         | Cumulative Cigarettes (10 Years)     |
| Acute lymphoid leukemia   | Female | Post Neonatal | 80 plus | Global     | 1         | Cumulative Cigarettes (5 Years)      |
| Acute lymphoid leukemia   | Female | Post Neonatal | 80 plus | Global     | 1         | Log-transformed SEV scalar: Leukemia |
| Acute lymphoid leukemia   | Female | Post Neonatal | 80 plus | Global     | 1         | Smoking Prevalence                   |
| Acute lymphoid leukemia   | Female | Post Neonatal | 80 plus | Global     | 1         | Sociodemographic Status              |
| Acute lymphoid leukemia   | Female | Post Neonatal | 80 plus | Data Rich  | -1        | Education (years per capita)         |
| Acute lymphoid leukemia   | Female | Post Neonatal | 80 plus | Data Rich  | -1        | Health System Access 2 (unitless)    |
| Acute lymphoid leukemia   | Female | Post Neonatal | 80 plus | Data Rich  | -1        | LDI (IS per capita)                  |
| Acute lymphoid leukemia   | Female | Post Neonatal | 80 plus | Data Rich  | 1         | Alcohol (litres per capita)          |
| Acute lymphoid leukemia   | Female | Post Neonatal | 80 plus | Data Rich  | 1         | Cumulative Cigarettes (10 Years)     |
| Acute lymphoid leukemia   | Female | Post Neonatal | 80 plus | Data Rich  | 1         | Cumulative Cigarettes (5 Years)      |
| Acute lymphoid leukemia   | Female | Post Neonatal | 80 plus | Data Rich  | 1         | Log-transformed SEV scalar: Leukemia |
| Acute lymphoid leukemia   | Female | Post Neonatal | 80 plus | Data Rich  | 1         | Smoking Prevalence                   |
| Acute lymphoid leukemia   | Female | Post Neonatal | 80 plus | Data Rich  | 1         | Sociodemographic Status              |
| Chronic lymphoid leukemia | Male   | 15 to 19      | 80 plus | Global     | -1        | Education (years per capita)         |
| Chronic lymphoid leukemia | Male   | 15 to 19      | 80 plus | Global     | -1        | Health System Access 2 (unitless)    |
| Chronic lymphoid leukemia | Male   | 15 to 19      | 80 plus | Global     | -1        | LDI (IS per capita)                  |
| Chronic lymphoid leukemia | Male   | 15 to 19      | 80 plus | Global     | 1         | Alcohol (litres per capita)          |
| Chronic lymphoid leukemia | Male   | 15 to 19      | 80 plus | Global     | 1         | Cumulative Cigarettes (10 Years)     |
| Chronic lymphoid leukemia | Male   | 15 to 19      | 80 plus | Global     | 1         | Cumulative Cigarettes (5 Years)      |
| Chronic lymphoid leukemia | Male   | 15 to 19      | 80 plus | Global     | 1         | Log-transformed SEV scalar: Leukemia |
| Chronic lymphoid leukemia | Male   | 15 to 19      | 80 plus | Global     | 1         | Smoking Prevalence                   |
| Chronic lymphoid leukemia | Male   | 15 to 19      | 80 plus | Global     | 1         | Sociodemographic Status              |
| Chronic lymphoid leukemia | Male   | 15 to 19      | 80 plus | Data Rich  | -1        | Education (years per capita)         |
| Chronic lymphoid leukemia | Male   | 15 to 19      | 80 plus | Data Rich  | -1        | Health System Access 2 (unitless)    |
| Chronic lymphoid leukemia | Male   | 15 to 19      | 80 plus | Data Rich  | -1        | LDI (IS per capita)                  |
| Chronic lymphoid leukemia | Male   | 15 to 19      | 80 plus | Data Rich  | 1         | Alcohol (litres per capita)          |
| Chronic lymphoid leukemia | Male   | 15 to 19      | 80 plus | Data Rich  | 1         | Cumulative Cigarettes (10 Years)     |
| Chronic lymphoid leukemia | Male   | 15 to 19      | 80 plus | Data Rich  | 1         | Cumulative Cigarettes (5 Years)      |
| Chronic lymphoid leukemia | Male   | 15 to 19      | 80 plus | Data Rich  | 1         | Log-transformed SEV scalar: Leukemia |
| Chronic lymphoid leukemia | Male   | 15 to 19      | 80 plus | Data Rich  | 1         | Smoking Prevalence                   |
| Chronic lymphoid leukemia | Male   | 15 to 19      | 80 plus | Data Rich  | 1         | Sociodemographic Status              |
| Chronic lymphoid leukemia | Female | 15 to 19      | 80 plus | Global     | -1        | Education (years per capita)         |

**Appendix Table 10: CODEm covariates used, level of covariate, and expected direction of covariate by cause, sex, and age**

| Cause                     | Sex    | Age start     | Age end | Model type | Direction | Covariate                            |
|---------------------------|--------|---------------|---------|------------|-----------|--------------------------------------|
| Chronic lymphoid leukemia | Female | 15 to 19      | 80 plus | Global     | -1        | Health System Access 2 (unitless)    |
| Chronic lymphoid leukemia | Female | 15 to 19      | 80 plus | Global     | -1        | LDI (IS per capita)                  |
| Chronic lymphoid leukemia | Female | 15 to 19      | 80 plus | Global     | 1         | Alcohol (litres per capita)          |
| Chronic lymphoid leukemia | Female | 15 to 19      | 80 plus | Global     | 1         | Cumulative Cigarettes (10 Years)     |
| Chronic lymphoid leukemia | Female | 15 to 19      | 80 plus | Global     | 1         | Cumulative Cigarettes (5 Years)      |
| Chronic lymphoid leukemia | Female | 15 to 19      | 80 plus | Global     | 1         | Log-transformed SEV scalar: Leukemia |
| Chronic lymphoid leukemia | Female | 15 to 19      | 80 plus | Global     | 1         | Smoking Prevalence                   |
| Chronic lymphoid leukemia | Female | 15 to 19      | 80 plus | Global     | 1         | Sociodemographic Status              |
| Chronic lymphoid leukemia | Female | 15 to 19      | 80 plus | Data Rich  | -1        | Education (years per capita)         |
| Chronic lymphoid leukemia | Female | 15 to 19      | 80 plus | Data Rich  | -1        | Health System Access 2 (unitless)    |
| Chronic lymphoid leukemia | Female | 15 to 19      | 80 plus | Data Rich  | -1        | LDI (IS per capita)                  |
| Chronic lymphoid leukemia | Female | 15 to 19      | 80 plus | Data Rich  | 1         | Alcohol (litres per capita)          |
| Chronic lymphoid leukemia | Female | 15 to 19      | 80 plus | Data Rich  | 1         | Cumulative Cigarettes (10 Years)     |
| Chronic lymphoid leukemia | Female | 15 to 19      | 80 plus | Data Rich  | 1         | Cumulative Cigarettes (5 Years)      |
| Chronic lymphoid leukemia | Female | 15 to 19      | 80 plus | Data Rich  | 1         | Log-transformed SEV scalar: Leukemia |
| Chronic lymphoid leukemia | Female | 15 to 19      | 80 plus | Data Rich  | 1         | Smoking Prevalence                   |
| Chronic lymphoid leukemia | Female | 15 to 19      | 80 plus | Data Rich  | 1         | Sociodemographic Status              |
| Acute myeloid leukemia    | Male   | Post Neonatal | 80 plus | Global     | -1        | Education (years per capita)         |
| Acute myeloid leukemia    | Male   | Post Neonatal | 80 plus | Global     | -1        | Health System Access 2 (unitless)    |
| Acute myeloid leukemia    | Male   | Post Neonatal | 80 plus | Global     | -1        | LDI (IS per capita)                  |
| Acute myeloid leukemia    | Male   | Post Neonatal | 80 plus | Global     | 1         | Alcohol (litres per capita)          |
| Acute myeloid leukemia    | Male   | Post Neonatal | 80 plus | Global     | 1         | Cumulative Cigarettes (10 Years)     |
| Acute myeloid leukemia    | Male   | Post Neonatal | 80 plus | Global     | 1         | Cumulative Cigarettes (5 Years)      |
| Acute myeloid leukemia    | Male   | Post Neonatal | 80 plus | Global     | 1         | Log-transformed SEV scalar: Leukemia |
| Acute myeloid leukemia    | Male   | Post Neonatal | 80 plus | Global     | 1         | Smoking Prevalence                   |
| Acute myeloid leukemia    | Male   | Post Neonatal | 80 plus | Global     | 1         | Sociodemographic Status              |
| Acute myeloid leukemia    | Male   | Post Neonatal | 80 plus | Global     | 1         | Tobacco (cigarettes per capita)      |
| Acute myeloid leukemia    | Male   | Post Neonatal | 80 plus | Data Rich  | -1        | Education (years per capita)         |
| Acute myeloid leukemia    | Male   | Post Neonatal | 80 plus | Data Rich  | -1        | Health System Access 2 (unitless)    |
| Acute myeloid leukemia    | Male   | Post Neonatal | 80 plus | Data Rich  | -1        | LDI (IS per capita)                  |
| Acute myeloid leukemia    | Male   | Post Neonatal | 80 plus | Data Rich  | 1         | Alcohol (litres per capita)          |
| Acute myeloid leukemia    | Male   | Post Neonatal | 80 plus | Data Rich  | 1         | Cumulative Cigarettes (10 Years)     |
| Acute myeloid leukemia    | Male   | Post Neonatal | 80 plus | Data Rich  | 1         | Cumulative Cigarettes (5 Years)      |
| Acute myeloid leukemia    | Male   | Post Neonatal | 80 plus | Data Rich  | 1         | Log-transformed SEV scalar: Leukemia |
| Acute myeloid leukemia    | Male   | Post Neonatal | 80 plus | Data Rich  | 1         | Smoking Prevalence                   |
| Acute myeloid leukemia    | Male   | Post Neonatal | 80 plus | Data Rich  | 1         | Sociodemographic Status              |
| Acute myeloid leukemia    | Male   | Post Neonatal | 80 plus | Data Rich  | 1         | Tobacco (cigarettes per capita)      |
| Acute myeloid leukemia    | Female | Post Neonatal | 80 plus | Global     | -1        | Education (years per capita)         |
| Acute myeloid leukemia    | Female | Post Neonatal | 80 plus | Global     | -1        | Health System Access 2 (unitless)    |
| Acute myeloid leukemia    | Female | Post Neonatal | 80 plus | Global     | -1        | LDI (IS per capita)                  |
| Acute myeloid leukemia    | Female | Post Neonatal | 80 plus | Global     | 1         | Alcohol (litres per capita)          |
| Acute myeloid leukemia    | Female | Post Neonatal | 80 plus | Global     | 1         | Cumulative Cigarettes (10 Years)     |
| Acute myeloid leukemia    | Female | Post Neonatal | 80 plus | Global     | 1         | Cumulative Cigarettes (5 Years)      |
| Acute myeloid leukemia    | Female | Post Neonatal | 80 plus | Global     | 1         | Log-transformed SEV scalar: Leukemia |

**Appendix Table 10: CODEm covariates used, level of covariate, and expected direction of covariate by cause, sex, and age**

| Cause                    | Sex    | Age start     | Age end | Model type | Direction | Covariate                            |
|--------------------------|--------|---------------|---------|------------|-----------|--------------------------------------|
| Acute myeloid leukemia   | Female | Post Neonatal | 80 plus | Global     | 1         | Smoking Prevalence                   |
| Acute myeloid leukemia   | Female | Post Neonatal | 80 plus | Global     | 1         | Sociodemographic Status              |
| Acute myeloid leukemia   | Female | Post Neonatal | 80 plus | Global     | 1         | Tobacco (cigarettes per capita)      |
| Acute myeloid leukemia   | Female | Post Neonatal | 80 plus | Data Rich  | -1        | Education (years per capita)         |
| Acute myeloid leukemia   | Female | Post Neonatal | 80 plus | Data Rich  | -1        | Health System Access 2 (unitless)    |
| Acute myeloid leukemia   | Female | Post Neonatal | 80 plus | Data Rich  | -1        | LDI (IS per capita)                  |
| Acute myeloid leukemia   | Female | Post Neonatal | 80 plus | Data Rich  | 1         | Alcohol (litres per capita)          |
| Acute myeloid leukemia   | Female | Post Neonatal | 80 plus | Data Rich  | 1         | Cumulative Cigarettes (10 Years)     |
| Acute myeloid leukemia   | Female | Post Neonatal | 80 plus | Data Rich  | 1         | Cumulative Cigarettes (5 Years)      |
| Acute myeloid leukemia   | Female | Post Neonatal | 80 plus | Data Rich  | 1         | Log-transformed SEV scalar: Leukemia |
| Acute myeloid leukemia   | Female | Post Neonatal | 80 plus | Data Rich  | 1         | Smoking Prevalence                   |
| Acute myeloid leukemia   | Female | Post Neonatal | 80 plus | Data Rich  | 1         | Sociodemographic Status              |
| Acute myeloid leukemia   | Female | Post Neonatal | 80 plus | Data Rich  | 1         | Tobacco (cigarettes per capita)      |
| Chronic myeloid leukemia | Male   | Post Neonatal | 80 plus | Global     | -1        | Education (years per capita)         |
| Chronic myeloid leukemia | Male   | Post Neonatal | 80 plus | Global     | -1        | LDI (IS per capita)                  |
| Chronic myeloid leukemia | Male   | Post Neonatal | 80 plus | Global     | 1         | Alcohol (litres per capita)          |
| Chronic myeloid leukemia | Male   | Post Neonatal | 80 plus | Global     | 1         | Cumulative Cigarettes (10 Years)     |
| Chronic myeloid leukemia | Male   | Post Neonatal | 80 plus | Global     | 1         | Cumulative Cigarettes (5 Years)      |
| Chronic myeloid leukemia | Male   | Post Neonatal | 80 plus | Global     | 1         | Health System Access 2 (unitless)    |
| Chronic myeloid leukemia | Male   | Post Neonatal | 80 plus | Global     | 1         | Log-transformed SEV scalar: Leukemia |
| Chronic myeloid leukemia | Male   | Post Neonatal | 80 plus | Global     | 1         | Smoking Prevalence                   |
| Chronic myeloid leukemia | Male   | Post Neonatal | 80 plus | Global     | 1         | Sociodemographic Status              |
| Chronic myeloid leukemia | Male   | Post Neonatal | 80 plus | Data Rich  | -1        | Education (years per capita)         |
| Chronic myeloid leukemia | Male   | Post Neonatal | 80 plus | Data Rich  | -1        | LDI (IS per capita)                  |
| Chronic myeloid leukemia | Male   | Post Neonatal | 80 plus | Data Rich  | 1         | Alcohol (litres per capita)          |
| Chronic myeloid leukemia | Male   | Post Neonatal | 80 plus | Data Rich  | 1         | Cumulative Cigarettes (10 Years)     |
| Chronic myeloid leukemia | Male   | Post Neonatal | 80 plus | Data Rich  | 1         | Cumulative Cigarettes (5 Years)      |
| Chronic myeloid leukemia | Male   | Post Neonatal | 80 plus | Data Rich  | 1         | Health System Access 2 (unitless)    |
| Chronic myeloid leukemia | Male   | Post Neonatal | 80 plus | Data Rich  | 1         | Log-transformed SEV scalar: Leukemia |
| Chronic myeloid leukemia | Male   | Post Neonatal | 80 plus | Data Rich  | 1         | Smoking Prevalence                   |
| Chronic myeloid leukemia | Male   | Post Neonatal | 80 plus | Data Rich  | 1         | Sociodemographic Status              |
| Chronic myeloid leukemia | Female | Post Neonatal | 80 plus | Global     | -1        | Education (years per capita)         |
| Chronic myeloid leukemia | Female | Post Neonatal | 80 plus | Global     | -1        | LDI (IS per capita)                  |
| Chronic myeloid leukemia | Female | Post Neonatal | 80 plus | Global     | 1         | Alcohol (litres per capita)          |
| Chronic myeloid leukemia | Female | Post Neonatal | 80 plus | Global     | 1         | Cumulative Cigarettes (10 Years)     |
| Chronic myeloid leukemia | Female | Post Neonatal | 80 plus | Global     | 1         | Cumulative Cigarettes (5 Years)      |
| Chronic myeloid leukemia | Female | Post Neonatal | 80 plus | Global     | 1         | Health System Access 2 (unitless)    |
| Chronic myeloid leukemia | Female | Post Neonatal | 80 plus | Global     | 1         | Log-transformed SEV scalar: Leukemia |
| Chronic myeloid leukemia | Female | Post Neonatal | 80 plus | Global     | 1         | Smoking Prevalence                   |
| Chronic myeloid leukemia | Female | Post Neonatal | 80 plus | Global     | 1         | Sociodemographic Status              |
| Chronic myeloid leukemia | Female | Post Neonatal | 80 plus | Data Rich  | -1        | Education (years per capita)         |
| Chronic myeloid leukemia | Female | Post Neonatal | 80 plus | Data Rich  | -1        | LDI (IS per capita)                  |
| Chronic myeloid leukemia | Female | Post Neonatal | 80 plus | Data Rich  | 1         | Alcohol (litres per capita)          |
| Chronic myeloid leukemia | Female | Post Neonatal | 80 plus | Data Rich  | 1         | Cumulative Cigarettes (10 Years)     |

**Appendix Table 10: CODEm covariates used, level of covariate, and expected direction of covariate by cause, sex, and age**

| Cause                    | Sex    | Age start      | Age end | Model type | Direction | Covariate                                |
|--------------------------|--------|----------------|---------|------------|-----------|------------------------------------------|
| Chronic myeloid leukemia | Female | Post Neonatal  | 80 plus | Data Rich  | 1         | Cumulative Cigarettes (5 Years)          |
| Chronic myeloid leukemia | Female | Post Neonatal  | 80 plus | Data Rich  | 1         | Health System Access 2 (unitless)        |
| Chronic myeloid leukemia | Female | Post Neonatal  | 80 plus | Data Rich  | 1         | Log-transformed SEV scalar: Leukemia     |
| Chronic myeloid leukemia | Female | Post Neonatal  | 80 plus | Data Rich  | 1         | Smoking Prevalence                       |
| Chronic myeloid leukemia | Female | Post Neonatal  | 80 plus | Data Rich  | 1         | Sociodemographic Status                  |
| Other neoplasms          | Male   | Early Neonatal | 80 plus | Global     | -1        | Education (years per capita)             |
| Other neoplasms          | Male   | Early Neonatal | 80 plus | Global     | -1        | Fruits (kcal per capita)                 |
| Other neoplasms          | Male   | Early Neonatal | 80 plus | Global     | -1        | Health System Access 2 (unitless)        |
| Other neoplasms          | Male   | Early Neonatal | 80 plus | Global     | -1        | LDI (IS per capita)                      |
| Other neoplasms          | Male   | Early Neonatal | 80 plus | Global     | -1        | Nuts & Seeds (kcal per capita)           |
| Other neoplasms          | Male   | Early Neonatal | 80 plus | Global     | -1        | PUFA Omega 3 - Seafood (kcal per capita) |
| Other neoplasms          | Male   | Early Neonatal | 80 plus | Global     | -1        | Vegetables (kcal per capita)             |
| Other neoplasms          | Male   | Early Neonatal | 80 plus | Global     | 0         | Sociodemographic Status                  |
| Other neoplasms          | Male   | Early Neonatal | 80 plus | Global     | 1         | Smoking Prevalence                       |
| Other neoplasms          | Male   | Early Neonatal | 80 plus | Global     | 1         | Tobacco (cigarettes per capita)          |
| Other neoplasms          | Male   | Early Neonatal | 80 plus | Data Rich  | -1        | Education (years per capita)             |
| Other neoplasms          | Male   | Early Neonatal | 80 plus | Data Rich  | -1        | Fruits (kcal per capita)                 |
| Other neoplasms          | Male   | Early Neonatal | 80 plus | Data Rich  | -1        | Health System Access 2 (unitless)        |
| Other neoplasms          | Male   | Early Neonatal | 80 plus | Data Rich  | -1        | LDI (IS per capita)                      |
| Other neoplasms          | Male   | Early Neonatal | 80 plus | Data Rich  | -1        | Nuts & Seeds (kcal per capita)           |
| Other neoplasms          | Male   | Early Neonatal | 80 plus | Data Rich  | -1        | PUFA Omega 3 - Seafood (kcal per capita) |
| Other neoplasms          | Male   | Early Neonatal | 80 plus | Data Rich  | -1        | Vegetables (kcal per capita)             |
| Other neoplasms          | Male   | Early Neonatal | 80 plus | Data Rich  | 0         | Sociodemographic Status                  |
| Other neoplasms          | Male   | Early Neonatal | 80 plus | Data Rich  | 1         | Smoking Prevalence                       |
| Other neoplasms          | Male   | Early Neonatal | 80 plus | Data Rich  | 1         | Tobacco (cigarettes per capita)          |
| Other neoplasms          | Female | Early Neonatal | 80 plus | Global     | -1        | Education (years per capita)             |
| Other neoplasms          | Female | Early Neonatal | 80 plus | Global     | -1        | Fruits (kcal per capita)                 |
| Other neoplasms          | Female | Early Neonatal | 80 plus | Global     | -1        | Health System Access 2 (unitless)        |
| Other neoplasms          | Female | Early Neonatal | 80 plus | Global     | -1        | LDI (IS per capita)                      |
| Other neoplasms          | Female | Early Neonatal | 80 plus | Global     | -1        | Nuts & Seeds (kcal per capita)           |
| Other neoplasms          | Female | Early Neonatal | 80 plus | Global     | -1        | PUFA Omega 3 - Seafood (kcal per capita) |
| Other neoplasms          | Female | Early Neonatal | 80 plus | Global     | -1        | Vegetables (kcal per capita)             |
| Other neoplasms          | Female | Early Neonatal | 80 plus | Global     | 0         | Sociodemographic Status                  |
| Other neoplasms          | Female | Early Neonatal | 80 plus | Global     | 1         | Smoking Prevalence                       |
| Other neoplasms          | Female | Early Neonatal | 80 plus | Global     | 1         | Tobacco (cigarettes per capita)          |
| Other neoplasms          | Female | Early Neonatal | 80 plus | Data Rich  | -1        | Education (years per capita)             |
| Other neoplasms          | Female | Early Neonatal | 80 plus | Data Rich  | -1        | Fruits (kcal per capita)                 |
| Other neoplasms          | Female | Early Neonatal | 80 plus | Data Rich  | -1        | Health System Access 2 (unitless)        |
| Other neoplasms          | Female | Early Neonatal | 80 plus | Data Rich  | -1        | Nuts & Seeds (kcal per capita)           |
| Other neoplasms          | Female | Early Neonatal | 80 plus | Data Rich  | -1        | PUFA Omega 3 - Seafood (kcal per capita) |
| Other neoplasms          | Female | Early Neonatal | 80 plus | Data Rich  | -1        | Vegetables (kcal per capita)             |
| Other neoplasms          | Female | Early Neonatal | 80 plus | Data Rich  | 0         | LDI (IS per capita)                      |
| Other neoplasms          | Female | Early Neonatal | 80 plus | Data Rich  | 0         | Sociodemographic Status                  |
| Other neoplasms          | Female | Early Neonatal | 80 plus | Data Rich  | 1         | Smoking Prevalence                       |

**Appendix Table 10: CODEm covariates used, level of covariate, and expected direction of covariate by cause, sex, and age**

| Cause                   | Sex    | Age start      | Age end | Model type | Direction | Covariate                                      |
|-------------------------|--------|----------------|---------|------------|-----------|------------------------------------------------|
| Other neoplasms         | Female | Early Neonatal | 80 plus | Data Rich  | 1         | Tobacco (cigarettes per capita)                |
| Cardiovascular diseases | Male   | Early Neonatal | 80 plus | Global     | -1        | LDI (IS per capita)                            |
| Cardiovascular diseases | Male   | Early Neonatal | 80 plus | Global     | -1        | omega 3 adjusted(g)                            |
| Cardiovascular diseases | Male   | Early Neonatal | 80 plus | Global     | -1        | vegetables adjusted(g)                         |
| Cardiovascular diseases | Male   | Early Neonatal | 80 plus | Global     | 0         | Alcohol (litres per capita)                    |
| Cardiovascular diseases | Male   | Early Neonatal | 80 plus | Global     | 0         | Sociodemographic Status                        |
| Cardiovascular diseases | Male   | Early Neonatal | 80 plus | Global     | 1         | Animal Fats (kcal per capita)                  |
| Cardiovascular diseases | Male   | Early Neonatal | 80 plus | Global     | 1         | Cholesterol (total, mean per capita)           |
| Cardiovascular diseases | Male   | Early Neonatal | 80 plus | Global     | 1         | Elevation Under 100m (proportion)              |
| Cardiovascular diseases | Male   | Early Neonatal | 80 plus | Global     | 1         | Smoking Prevalence                             |
| Cardiovascular diseases | Male   | Early Neonatal | 80 plus | Global     | 1         | red meats adjusted(g)                          |
| Cardiovascular diseases | Male   | Early Neonatal | 80 plus | Data Rich  | -1        | LDI (IS per capita)                            |
| Cardiovascular diseases | Male   | Early Neonatal | 80 plus | Data Rich  | -1        | omega 3 adjusted(g)                            |
| Cardiovascular diseases | Male   | Early Neonatal | 80 plus | Data Rich  | -1        | vegetables adjusted(g)                         |
| Cardiovascular diseases | Male   | Early Neonatal | 80 plus | Data Rich  | 0         | Alcohol (litres per capita)                    |
| Cardiovascular diseases | Male   | Early Neonatal | 80 plus | Data Rich  | 0         | Sociodemographic Status                        |
| Cardiovascular diseases | Male   | Early Neonatal | 80 plus | Data Rich  | 1         | Animal Fats (kcal per capita)                  |
| Cardiovascular diseases | Male   | Early Neonatal | 80 plus | Data Rich  | 1         | Cholesterol (total, mean per capita)           |
| Cardiovascular diseases | Male   | Early Neonatal | 80 plus | Data Rich  | 1         | Elevation Under 100m (proportion)              |
| Cardiovascular diseases | Male   | Early Neonatal | 80 plus | Data Rich  | 1         | Smoking Prevalence                             |
| Cardiovascular diseases | Male   | Early Neonatal | 80 plus | Data Rich  | 1         | red meats adjusted(g)                          |
| Cardiovascular diseases | Female | Early Neonatal | 80 plus | Global     | -1        | LDI (IS per capita)                            |
| Cardiovascular diseases | Female | Early Neonatal | 80 plus | Global     | -1        | omega 3 adjusted(g)                            |
| Cardiovascular diseases | Female | Early Neonatal | 80 plus | Global     | -1        | vegetables adjusted(g)                         |
| Cardiovascular diseases | Female | Early Neonatal | 80 plus | Global     | 0         | Alcohol (litres per capita)                    |
| Cardiovascular diseases | Female | Early Neonatal | 80 plus | Global     | 0         | Sociodemographic Status                        |
| Cardiovascular diseases | Female | Early Neonatal | 80 plus | Global     | 1         | Animal Fats (kcal per capita)                  |
| Cardiovascular diseases | Female | Early Neonatal | 80 plus | Global     | 1         | Cholesterol (total, mean per capita)           |
| Cardiovascular diseases | Female | Early Neonatal | 80 plus | Global     | 1         | Elevation Under 100m (proportion)              |
| Cardiovascular diseases | Female | Early Neonatal | 80 plus | Global     | 1         | Smoking Prevalence                             |
| Cardiovascular diseases | Female | Early Neonatal | 80 plus | Global     | 1         | red meats adjusted(g)                          |
| Cardiovascular diseases | Female | Early Neonatal | 80 plus | Data Rich  | -1        | LDI (IS per capita)                            |
| Cardiovascular diseases | Female | Early Neonatal | 80 plus | Data Rich  | -1        | omega 3 adjusted(g)                            |
| Cardiovascular diseases | Female | Early Neonatal | 80 plus | Data Rich  | -1        | vegetables adjusted(g)                         |
| Cardiovascular diseases | Female | Early Neonatal | 80 plus | Data Rich  | 0         | Alcohol (litres per capita)                    |
| Cardiovascular diseases | Female | Early Neonatal | 80 plus | Data Rich  | 0         | Sociodemographic Status                        |
| Cardiovascular diseases | Female | Early Neonatal | 80 plus | Data Rich  | 1         | Animal Fats (kcal per capita)                  |
| Cardiovascular diseases | Female | Early Neonatal | 80 plus | Data Rich  | 1         | Cholesterol (total, mean per capita)           |
| Cardiovascular diseases | Female | Early Neonatal | 80 plus | Data Rich  | 1         | Elevation Under 100m (proportion)              |
| Cardiovascular diseases | Female | Early Neonatal | 80 plus | Data Rich  | 1         | Smoking Prevalence                             |
| Cardiovascular diseases | Female | Early Neonatal | 80 plus | Data Rich  | 1         | red meats adjusted(g)                          |
| Rheumatic heart disease | Male   | 1 to 4         | 80 plus | Global     | -1        | Education (years per capita)                   |
| Rheumatic heart disease | Male   | 1 to 4         | 80 plus | Global     | -1        | Health System Access 2 (unitless)              |
| Rheumatic heart disease | Male   | 1 to 4         | 80 plus | Global     | -1        | Improved Water Source (proportion with access) |

**Appendix Table 10: CODEm covariates used, level of covariate, and expected direction of covariate by cause, sex, and age**

| Cause                   | Sex    | Age start     | Age end | Model type | Direction | Covariate                                      |
|-------------------------|--------|---------------|---------|------------|-----------|------------------------------------------------|
| Rheumatic heart disease | Male   | 1 to 4        | 80 plus | Global     | -1        | LDI (IS per capita)                            |
| Rheumatic heart disease | Male   | 1 to 4        | 80 plus | Global     | -1        | Sanitation (proportion with access)            |
| Rheumatic heart disease | Male   | 1 to 4        | 80 plus | Global     | -1        | Sociodemographic Status                        |
| Rheumatic heart disease | Male   | 1 to 4        | 80 plus | Global     | 1         | Log-transformed SEV scalar: RHD                |
| Rheumatic heart disease | Male   | 1 to 4        | 80 plus | Global     | 1         | Malnutrition (proportion <2SD weight for age)  |
| Rheumatic heart disease | Male   | 1 to 4        | 80 plus | Global     | 1         | Population Under 30 (proportion)               |
| Rheumatic heart disease | Male   | 1 to 4        | 80 plus | Data Rich  | -1        | Education (years per capita)                   |
| Rheumatic heart disease | Male   | 1 to 4        | 80 plus | Data Rich  | -1        | Health System Access 2 (unitless)              |
| Rheumatic heart disease | Male   | 1 to 4        | 80 plus | Data Rich  | -1        | Improved Water Source (proportion with access) |
| Rheumatic heart disease | Male   | 1 to 4        | 80 plus | Data Rich  | -1        | LDI (IS per capita)                            |
| Rheumatic heart disease | Male   | 1 to 4        | 80 plus | Data Rich  | -1        | Sanitation (proportion with access)            |
| Rheumatic heart disease | Male   | 1 to 4        | 80 plus | Data Rich  | -1        | Sociodemographic Status                        |
| Rheumatic heart disease | Male   | 1 to 4        | 80 plus | Data Rich  | 1         | Log-transformed SEV scalar: RHD                |
| Rheumatic heart disease | Male   | 1 to 4        | 80 plus | Data Rich  | 1         | Malnutrition (proportion <2SD weight for age)  |
| Rheumatic heart disease | Male   | 1 to 4        | 80 plus | Data Rich  | 1         | Population Under 30 (proportion)               |
| Rheumatic heart disease | Female | 1 to 4        | 80 plus | Global     | -1        | Education (years per capita)                   |
| Rheumatic heart disease | Female | 1 to 4        | 80 plus | Global     | -1        | Health System Access 2 (unitless)              |
| Rheumatic heart disease | Female | 1 to 4        | 80 plus | Global     | -1        | Improved Water Source (proportion with access) |
| Rheumatic heart disease | Female | 1 to 4        | 80 plus | Global     | -1        | LDI (IS per capita)                            |
| Rheumatic heart disease | Female | 1 to 4        | 80 plus | Global     | -1        | Sanitation (proportion with access)            |
| Rheumatic heart disease | Female | 1 to 4        | 80 plus | Global     | -1        | Sociodemographic Status                        |
| Rheumatic heart disease | Female | 1 to 4        | 80 plus | Global     | 1         | Log-transformed SEV scalar: RHD                |
| Rheumatic heart disease | Female | 1 to 4        | 80 plus | Global     | 1         | Malnutrition (proportion <2SD weight for age)  |
| Rheumatic heart disease | Female | 1 to 4        | 80 plus | Global     | 1         | Population Under 30 (proportion)               |
| Rheumatic heart disease | Female | 1 to 4        | 80 plus | Data Rich  | -1        | Education (years per capita)                   |
| Rheumatic heart disease | Female | 1 to 4        | 80 plus | Data Rich  | -1        | Health System Access 2 (unitless)              |
| Rheumatic heart disease | Female | 1 to 4        | 80 plus | Data Rich  | -1        | Improved Water Source (proportion with access) |
| Rheumatic heart disease | Female | 1 to 4        | 80 plus | Data Rich  | -1        | LDI (IS per capita)                            |
| Rheumatic heart disease | Female | 1 to 4        | 80 plus | Data Rich  | -1        | Sanitation (proportion with access)            |
| Rheumatic heart disease | Female | 1 to 4        | 80 plus | Data Rich  | -1        | Sociodemographic Status                        |
| Rheumatic heart disease | Female | 1 to 4        | 80 plus | Data Rich  | 1         | Log-transformed SEV scalar: RHD                |
| Rheumatic heart disease | Female | 1 to 4        | 80 plus | Data Rich  | 1         | Malnutrition (proportion <2SD weight for age)  |
| Rheumatic heart disease | Female | 1 to 4        | 80 plus | Data Rich  | 1         | Population Under 30 (proportion)               |
| Ischemic heart disease  | Male   | Post Neonatal | 80 plus | Global     | -1        | LDI (IS per capita)                            |
| Ischemic heart disease  | Male   | Post Neonatal | 80 plus | Global     | -1        | omega 3 adjusted(g)                            |
| Ischemic heart disease  | Male   | Post Neonatal | 80 plus | Global     | -1        | pulses legumes adjusted(g)                     |
| Ischemic heart disease  | Male   | Post Neonatal | 80 plus | Global     | -1        | vegetables adjusted(g)                         |
| Ischemic heart disease  | Male   | Post Neonatal | 80 plus | Global     | 0         | Alcohol (litres per capita)                    |
| Ischemic heart disease  | Male   | Post Neonatal | 80 plus | Global     | 0         | Sociodemographic Status                        |
| Ischemic heart disease  | Male   | Post Neonatal | 80 plus | Global     | 1         | Animal Fats (kcal per capita)                  |
| Ischemic heart disease  | Male   | Post Neonatal | 80 plus | Global     | 1         | Cholesterol (total, mean per capita)           |
| Ischemic heart disease  | Male   | Post Neonatal | 80 plus | Global     | 1         | Elevation Under 100m (proportion)              |
| Ischemic heart disease  | Male   | Post Neonatal | 80 plus | Global     | 1         | Log-transformed SEV scalar: IHD                |
| Ischemic heart disease  | Male   | Post Neonatal | 80 plus | Global     | 1         | Smoking Prevalence                             |



**Appendix Table 10: CODEm covariates used, level of covariate, and expected direction of covariate by cause, sex, and age**

| Cause                   | Sex    | Age start      | Age end | Model type | Direction | Covariate                            |
|-------------------------|--------|----------------|---------|------------|-----------|--------------------------------------|
| Ischemic heart disease  | Male   | Post Neonatal  | 80 plus | Global     | 1         | red meats adjusted(g)                |
| Ischemic heart disease  | Male   | Post Neonatal  | 80 plus | Data Rich  | -1        | LDI (IS per capita)                  |
| Ischemic heart disease  | Male   | Post Neonatal  | 80 plus | Data Rich  | -1        | omega 3 adjusted(g)                  |
| Ischemic heart disease  | Male   | Post Neonatal  | 80 plus | Data Rich  | -1        | pulses legumes adjusted(g)           |
| Ischemic heart disease  | Male   | Post Neonatal  | 80 plus | Data Rich  | -1        | vegetables adjusted(g)               |
| Ischemic heart disease  | Male   | Post Neonatal  | 80 plus | Data Rich  | 0         | Alcohol (litres per capita)          |
| Ischemic heart disease  | Male   | Post Neonatal  | 80 plus | Data Rich  | 0         | Sociodemographic Status              |
| Ischemic heart disease  | Male   | Post Neonatal  | 80 plus | Data Rich  | 1         | Animal Fats (kcal per capita)        |
| Ischemic heart disease  | Male   | Post Neonatal  | 80 plus | Data Rich  | 1         | Cholesterol (total, mean per capita) |
| Ischemic heart disease  | Male   | Post Neonatal  | 80 plus | Data Rich  | 1         | Elevation Under 100m (proportion)    |
| Ischemic heart disease  | Male   | Post Neonatal  | 80 plus | Data Rich  | 1         | Log-transformed SEV scalar: IHD      |
| Ischemic heart disease  | Male   | Post Neonatal  | 80 plus | Data Rich  | 1         | Smoking Prevalence                   |
| Ischemic heart disease  | Male   | Post Neonatal  | 80 plus | Data Rich  | 1         | red meats adjusted(g)                |
| Ischemic heart disease  | Female | Post Neonatal  | 80 plus | Global     | -1        | LDI (IS per capita)                  |
| Ischemic heart disease  | Female | Post Neonatal  | 80 plus | Global     | -1        | omega 3 adjusted(g)                  |
| Ischemic heart disease  | Female | Post Neonatal  | 80 plus | Global     | -1        | pulses legumes adjusted(g)           |
| Ischemic heart disease  | Female | Post Neonatal  | 80 plus | Global     | -1        | vegetables adjusted(g)               |
| Ischemic heart disease  | Female | Post Neonatal  | 80 plus | Global     | 0         | Alcohol (litres per capita)          |
| Ischemic heart disease  | Female | Post Neonatal  | 80 plus | Global     | 0         | Sociodemographic Status              |
| Ischemic heart disease  | Female | Post Neonatal  | 80 plus | Global     | 1         | Animal Fats (kcal per capita)        |
| Ischemic heart disease  | Female | Post Neonatal  | 80 plus | Global     | 1         | Cholesterol (total, mean per capita) |
| Ischemic heart disease  | Female | Post Neonatal  | 80 plus | Global     | 1         | Elevation Under 100m (proportion)    |
| Ischemic heart disease  | Female | Post Neonatal  | 80 plus | Global     | 1         | Log-transformed SEV scalar: IHD      |
| Ischemic heart disease  | Female | Post Neonatal  | 80 plus | Global     | 1         | Smoking Prevalence                   |
| Ischemic heart disease  | Female | Post Neonatal  | 80 plus | Global     | 1         | red meats adjusted(g)                |
| Ischemic heart disease  | Female | Post Neonatal  | 80 plus | Data Rich  | -1        | LDI (IS per capita)                  |
| Ischemic heart disease  | Female | Post Neonatal  | 80 plus | Data Rich  | -1        | omega 3 adjusted(g)                  |
| Ischemic heart disease  | Female | Post Neonatal  | 80 plus | Data Rich  | -1        | pulses legumes adjusted(g)           |
| Ischemic heart disease  | Female | Post Neonatal  | 80 plus | Data Rich  | -1        | vegetables adjusted(g)               |
| Ischemic heart disease  | Female | Post Neonatal  | 80 plus | Data Rich  | 0         | Alcohol (litres per capita)          |
| Ischemic heart disease  | Female | Post Neonatal  | 80 plus | Data Rich  | 0         | Sociodemographic Status              |
| Ischemic heart disease  | Female | Post Neonatal  | 80 plus | Data Rich  | 1         | Animal Fats (kcal per capita)        |
| Ischemic heart disease  | Female | Post Neonatal  | 80 plus | Data Rich  | 1         | Cholesterol (total, mean per capita) |
| Ischemic heart disease  | Female | Post Neonatal  | 80 plus | Data Rich  | 1         | Elevation Under 100m (proportion)    |
| Ischemic heart disease  | Female | Post Neonatal  | 80 plus | Data Rich  | 1         | Log-transformed SEV scalar: IHD      |
| Ischemic heart disease  | Female | Post Neonatal  | 80 plus | Data Rich  | 1         | Smoking Prevalence                   |
| Ischemic heart disease  | Female | Post Neonatal  | 80 plus | Data Rich  | 1         | red meats adjusted(g)                |
| Cerebrovascular disease | Male   | Early Neonatal | 80 plus | Global     | -1        | Education (years per capita)         |
| Cerebrovascular disease | Male   | Early Neonatal | 80 plus | Global     | -1        | LDI (IS per capita)                  |
| Cerebrovascular disease | Male   | Early Neonatal | 80 plus | Global     | -1        | fruits adjusted(g)                   |
| Cerebrovascular disease | Male   | Early Neonatal | 80 plus | Global     | -1        | vegetables adjusted(g)               |
| Cerebrovascular disease | Male   | Early Neonatal | 80 plus | Global     | -1        | whole grains adjusted(g)             |
| Cerebrovascular disease | Male   | Early Neonatal | 80 plus | Global     | 0         | Alcohol (litres per capita)          |
| Cerebrovascular disease | Male   | Early Neonatal | 80 plus | Global     | 0         | Sociodemographic Status              |

**Appendix Table 10: CODEm covariates used, level of covariate, and expected direction of covariate by cause, sex, and age**

| Cause                   | Sex    | Age start      | Age end | Model type | Direction | Covariate                                         |
|-------------------------|--------|----------------|---------|------------|-----------|---------------------------------------------------|
| Cerebrovascular disease | Male   | Early Neonatal | 80 plus | Global     | 1         | Cholesterol (total, mean per capita)              |
| Cerebrovascular disease | Male   | Early Neonatal | 80 plus | Global     | 1         | Cumulative Cigarettes (5 Years)                   |
| Cerebrovascular disease | Male   | Early Neonatal | 80 plus | Global     | 1         | Diabetes Age-Standardised Prevalence (proportion) |
| Cerebrovascular disease | Male   | Early Neonatal | 80 plus | Global     | 1         | Log-transformed SEV scalar: Stroke                |
| Cerebrovascular disease | Male   | Early Neonatal | 80 plus | Global     | 1         | Mean BMI                                          |
| Cerebrovascular disease | Male   | Early Neonatal | 80 plus | Global     | 1         | Systolic Blood Pressure (mmHg)                    |
| Cerebrovascular disease | Male   | Early Neonatal | 80 plus | Global     | 1         | red meats adjusted(g)                             |
| Cerebrovascular disease | Male   | Early Neonatal | 80 plus | Data Rich  | -1        | Education (years per capita)                      |
| Cerebrovascular disease | Male   | Early Neonatal | 80 plus | Data Rich  | -1        | LDI (IS per capita)                               |
| Cerebrovascular disease | Male   | Early Neonatal | 80 plus | Data Rich  | -1        | fruits adjusted(g)                                |
| Cerebrovascular disease | Male   | Early Neonatal | 80 plus | Data Rich  | -1        | vegetables adjusted(g)                            |
| Cerebrovascular disease | Male   | Early Neonatal | 80 plus | Data Rich  | -1        | whole grains adjusted(g)                          |
| Cerebrovascular disease | Male   | Early Neonatal | 80 plus | Data Rich  | 0         | Alcohol (litres per capita)                       |
| Cerebrovascular disease | Male   | Early Neonatal | 80 plus | Data Rich  | 0         | Sociodemographic Status                           |
| Cerebrovascular disease | Male   | Early Neonatal | 80 plus | Data Rich  | 1         | Cholesterol (total, mean per capita)              |
| Cerebrovascular disease | Male   | Early Neonatal | 80 plus | Data Rich  | 1         | Cumulative Cigarettes (5 Years)                   |
| Cerebrovascular disease | Male   | Early Neonatal | 80 plus | Data Rich  | 1         | Diabetes Age-Standardised Prevalence (proportion) |
| Cerebrovascular disease | Male   | Early Neonatal | 80 plus | Data Rich  | 1         | Log-transformed SEV scalar: Stroke                |
| Cerebrovascular disease | Male   | Early Neonatal | 80 plus | Data Rich  | 1         | Mean BMI                                          |
| Cerebrovascular disease | Male   | Early Neonatal | 80 plus | Data Rich  | 1         | Systolic Blood Pressure (mmHg)                    |
| Cerebrovascular disease | Male   | Early Neonatal | 80 plus | Data Rich  | 1         | red meats adjusted(g)                             |
| Cerebrovascular disease | Female | Early Neonatal | 80 plus | Global     | -1        | Education (years per capita)                      |
| Cerebrovascular disease | Female | Early Neonatal | 80 plus | Global     | -1        | LDI (IS per capita)                               |
| Cerebrovascular disease | Female | Early Neonatal | 80 plus | Global     | -1        | fruits adjusted(g)                                |
| Cerebrovascular disease | Female | Early Neonatal | 80 plus | Global     | -1        | vegetables adjusted(g)                            |
| Cerebrovascular disease | Female | Early Neonatal | 80 plus | Global     | -1        | whole grains adjusted(g)                          |
| Cerebrovascular disease | Female | Early Neonatal | 80 plus | Global     | 0         | Alcohol (litres per capita)                       |
| Cerebrovascular disease | Female | Early Neonatal | 80 plus | Global     | 0         | Sociodemographic Status                           |
| Cerebrovascular disease | Female | Early Neonatal | 80 plus | Global     | 1         | Cholesterol (total, mean per capita)              |
| Cerebrovascular disease | Female | Early Neonatal | 80 plus | Global     | 1         | Cumulative Cigarettes (5 Years)                   |
| Cerebrovascular disease | Female | Early Neonatal | 80 plus | Global     | 1         | Diabetes Age-Standardised Prevalence (proportion) |
| Cerebrovascular disease | Female | Early Neonatal | 80 plus | Global     | 1         | Log-transformed SEV scalar: Stroke                |
| Cerebrovascular disease | Female | Early Neonatal | 80 plus | Global     | 1         | Mean BMI                                          |
| Cerebrovascular disease | Female | Early Neonatal | 80 plus | Global     | 1         | Systolic Blood Pressure (mmHg)                    |
| Cerebrovascular disease | Female | Early Neonatal | 80 plus | Global     | 1         | red meats adjusted(g)                             |
| Cerebrovascular disease | Female | Early Neonatal | 80 plus | Data Rich  | -1        | Education (years per capita)                      |
| Cerebrovascular disease | Female | Early Neonatal | 80 plus | Data Rich  | -1        | LDI (IS per capita)                               |
| Cerebrovascular disease | Female | Early Neonatal | 80 plus | Data Rich  | -1        | fruits adjusted(g)                                |
| Cerebrovascular disease | Female | Early Neonatal | 80 plus | Data Rich  | -1        | vegetables adjusted(g)                            |
| Cerebrovascular disease | Female | Early Neonatal | 80 plus | Data Rich  | -1        | whole grains adjusted(g)                          |
| Cerebrovascular disease | Female | Early Neonatal | 80 plus | Data Rich  | 0         | Alcohol (litres per capita)                       |
| Cerebrovascular disease | Female | Early Neonatal | 80 plus | Data Rich  | 0         | Sociodemographic Status                           |
| Cerebrovascular disease | Female | Early Neonatal | 80 plus | Data Rich  | 1         | Cholesterol (total, mean per capita)              |
| Cerebrovascular disease | Female | Early Neonatal | 80 plus | Data Rich  | 1         | Cumulative Cigarettes (5 Years)                   |

**Appendix Table 10: CODEm covariates used, level of covariate, and expected direction of covariate by cause, sex, and age**

| Cause                   | Sex    | Age start      | Age end | Model type | Direction | Covariate                                         |
|-------------------------|--------|----------------|---------|------------|-----------|---------------------------------------------------|
| Cerebrovascular disease | Female | Early Neonatal | 80 plus | Data Rich  | 1         | Diabetes Age-Standardised Prevalence (proportion) |
| Cerebrovascular disease | Female | Early Neonatal | 80 plus | Data Rich  | 1         | Log-transformed SEV scalar: Stroke                |
| Cerebrovascular disease | Female | Early Neonatal | 80 plus | Data Rich  | 1         | Mean BMI                                          |
| Cerebrovascular disease | Female | Early Neonatal | 80 plus | Data Rich  | 1         | Systolic Blood Pressure (mmHg)                    |
| Cerebrovascular disease | Female | Early Neonatal | 80 plus | Data Rich  | 1         | red meats adjusted(g)                             |
| Ischemic stroke         | Male   | Post Neonatal  | 80 plus | Global     | -1        | Education (years per capita)                      |
| Ischemic stroke         | Male   | Post Neonatal  | 80 plus | Global     | -1        | Health System Access 2 (unitless)                 |
| Ischemic stroke         | Male   | Post Neonatal  | 80 plus | Global     | -1        | LDI (I\$ per capita)                              |
| Ischemic stroke         | Male   | Post Neonatal  | 80 plus | Global     | -1        | Nuts & Seeds (kcal per capita)                    |
| Ischemic stroke         | Male   | Post Neonatal  | 80 plus | Global     | -1        | PUFA Omega 3 - Seafood (kcal per capita)          |
| Ischemic stroke         | Male   | Post Neonatal  | 80 plus | Global     | -1        | fruits adjusted(g)                                |
| Ischemic stroke         | Male   | Post Neonatal  | 80 plus | Global     | -1        | milk adjusted(g)                                  |
| Ischemic stroke         | Male   | Post Neonatal  | 80 plus | Global     | -1        | nuts seeds adjusted(g)                            |
| Ischemic stroke         | Male   | Post Neonatal  | 80 plus | Global     | -1        | omega 3 adjusted(g)                               |
| Ischemic stroke         | Male   | Post Neonatal  | 80 plus | Global     | -1        | pulses legumes adjusted(g)                        |
| Ischemic stroke         | Male   | Post Neonatal  | 80 plus | Global     | -1        | vegetables adjusted(g)                            |
| Ischemic stroke         | Male   | Post Neonatal  | 80 plus | Global     | 0         | Alcohol (litres per capita)                       |
| Ischemic stroke         | Male   | Post Neonatal  | 80 plus | Global     | 0         | Sociodemographic Status                           |
| Ischemic stroke         | Male   | Post Neonatal  | 80 plus | Global     | 1         | Animal Fats (kcal per capita)                     |
| Ischemic stroke         | Male   | Post Neonatal  | 80 plus | Global     | 1         | Cholesterol (total, mean per capita)              |
| Ischemic stroke         | Male   | Post Neonatal  | 80 plus | Global     | 1         | Log-transformed SEV scalar: Isch Stroke           |
| Ischemic stroke         | Male   | Post Neonatal  | 80 plus | Global     | 1         | Smoking Prevalence                                |
| Ischemic stroke         | Male   | Post Neonatal  | 80 plus | Data Rich  | -1        | Education (years per capita)                      |
| Ischemic stroke         | Male   | Post Neonatal  | 80 plus | Data Rich  | -1        | Health System Access 2 (unitless)                 |
| Ischemic stroke         | Male   | Post Neonatal  | 80 plus | Data Rich  | -1        | LDI (I\$ per capita)                              |
| Ischemic stroke         | Male   | Post Neonatal  | 80 plus | Data Rich  | -1        | Nuts & Seeds (kcal per capita)                    |
| Ischemic stroke         | Male   | Post Neonatal  | 80 plus | Data Rich  | -1        | PUFA Omega 3 - Seafood (kcal per capita)          |
| Ischemic stroke         | Male   | Post Neonatal  | 80 plus | Data Rich  | -1        | fruits adjusted(g)                                |
| Ischemic stroke         | Male   | Post Neonatal  | 80 plus | Data Rich  | -1        | milk adjusted(g)                                  |
| Ischemic stroke         | Male   | Post Neonatal  | 80 plus | Data Rich  | -1        | nuts seeds adjusted(g)                            |
| Ischemic stroke         | Male   | Post Neonatal  | 80 plus | Data Rich  | -1        | omega 3 adjusted(g)                               |
| Ischemic stroke         | Male   | Post Neonatal  | 80 plus | Data Rich  | -1        | pulses legumes adjusted(g)                        |
| Ischemic stroke         | Male   | Post Neonatal  | 80 plus | Data Rich  | -1        | vegetables adjusted(g)                            |
| Ischemic stroke         | Male   | Post Neonatal  | 80 plus | Data Rich  | 0         | Alcohol (litres per capita)                       |
| Ischemic stroke         | Male   | Post Neonatal  | 80 plus | Data Rich  | 0         | Sociodemographic Status                           |
| Ischemic stroke         | Male   | Post Neonatal  | 80 plus | Data Rich  | 1         | Animal Fats (kcal per capita)                     |
| Ischemic stroke         | Male   | Post Neonatal  | 80 plus | Data Rich  | 1         | Cholesterol (total, mean per capita)              |
| Ischemic stroke         | Male   | Post Neonatal  | 80 plus | Data Rich  | 1         | Log-transformed SEV scalar: Isch Stroke           |
| Ischemic stroke         | Male   | Post Neonatal  | 80 plus | Data Rich  | 1         | Smoking Prevalence                                |
| Ischemic stroke         | Female | Post Neonatal  | 80 plus | Global     | -1        | Education (years per capita)                      |
| Ischemic stroke         | Female | Post Neonatal  | 80 plus | Global     | -1        | Health System Access 2 (unitless)                 |
| Ischemic stroke         | Female | Post Neonatal  | 80 plus | Global     | -1        | LDI (I\$ per capita)                              |
| Ischemic stroke         | Female | Post Neonatal  | 80 plus | Global     | -1        | Nuts & Seeds (kcal per capita)                    |
| Ischemic stroke         | Female | Post Neonatal  | 80 plus | Global     | -1        | PUFA Omega 3 - Seafood (kcal per capita)          |

**Appendix Table 10: CODEm covariates used, level of covariate, and expected direction of covariate by cause, sex, and age**

| Cause              | Sex    | Age start      | Age end | Model type | Direction | Covariate                                |
|--------------------|--------|----------------|---------|------------|-----------|------------------------------------------|
| Ischemic stroke    | Female | Post Neonatal  | 80 plus | Global     | -1        | fruits adjusted(g)                       |
| Ischemic stroke    | Female | Post Neonatal  | 80 plus | Global     | -1        | milk adjusted(g)                         |
| Ischemic stroke    | Female | Post Neonatal  | 80 plus | Global     | -1        | nuts seeds adjusted(g)                   |
| Ischemic stroke    | Female | Post Neonatal  | 80 plus | Global     | -1        | omega 3 adjusted(g)                      |
| Ischemic stroke    | Female | Post Neonatal  | 80 plus | Global     | -1        | pulses legumes adjusted(g)               |
| Ischemic stroke    | Female | Post Neonatal  | 80 plus | Global     | -1        | vegetables adjusted(g)                   |
| Ischemic stroke    | Female | Post Neonatal  | 80 plus | Global     | 0         | Alcohol (litres per capita)              |
| Ischemic stroke    | Female | Post Neonatal  | 80 plus | Global     | 0         | Sociodemographic Status                  |
| Ischemic stroke    | Female | Post Neonatal  | 80 plus | Global     | 1         | Animal Fats (kcal per capita)            |
| Ischemic stroke    | Female | Post Neonatal  | 80 plus | Global     | 1         | Cholesterol (total, mean per capita)     |
| Ischemic stroke    | Female | Post Neonatal  | 80 plus | Global     | 1         | Log-transformed SEV scalar: Isch Stroke  |
| Ischemic stroke    | Female | Post Neonatal  | 80 plus | Global     | 1         | Smoking Prevalence                       |
| Ischemic stroke    | Female | Post Neonatal  | 80 plus | Data Rich  | -1        | Education (years per capita)             |
| Ischemic stroke    | Female | Post Neonatal  | 80 plus | Data Rich  | -1        | Health System Access 2 (unitless)        |
| Ischemic stroke    | Female | Post Neonatal  | 80 plus | Data Rich  | -1        | LDI (IS per capita)                      |
| Ischemic stroke    | Female | Post Neonatal  | 80 plus | Data Rich  | -1        | Nuts & Seeds (kcal per capita)           |
| Ischemic stroke    | Female | Post Neonatal  | 80 plus | Data Rich  | -1        | PUFA Omega 3 - Seafood (kcal per capita) |
| Ischemic stroke    | Female | Post Neonatal  | 80 plus | Data Rich  | -1        | fruits adjusted(g)                       |
| Ischemic stroke    | Female | Post Neonatal  | 80 plus | Data Rich  | -1        | milk adjusted(g)                         |
| Ischemic stroke    | Female | Post Neonatal  | 80 plus | Data Rich  | -1        | nuts seeds adjusted(g)                   |
| Ischemic stroke    | Female | Post Neonatal  | 80 plus | Data Rich  | -1        | omega 3 adjusted(g)                      |
| Ischemic stroke    | Female | Post Neonatal  | 80 plus | Data Rich  | -1        | pulses legumes adjusted(g)               |
| Ischemic stroke    | Female | Post Neonatal  | 80 plus | Data Rich  | -1        | vegetables adjusted(g)                   |
| Ischemic stroke    | Female | Post Neonatal  | 80 plus | Data Rich  | 0         | Alcohol (litres per capita)              |
| Ischemic stroke    | Female | Post Neonatal  | 80 plus | Data Rich  | 0         | Sociodemographic Status                  |
| Ischemic stroke    | Female | Post Neonatal  | 80 plus | Data Rich  | 1         | Animal Fats (kcal per capita)            |
| Ischemic stroke    | Female | Post Neonatal  | 80 plus | Data Rich  | 1         | Cholesterol (total, mean per capita)     |
| Ischemic stroke    | Female | Post Neonatal  | 80 plus | Data Rich  | 1         | Log-transformed SEV scalar: Isch Stroke  |
| Ischemic stroke    | Female | Post Neonatal  | 80 plus | Data Rich  | 1         | Smoking Prevalence                       |
| Hemorrhagic stroke | Male   | Early Neonatal | 80 plus | Global     | -1        | Education (years per capita)             |
| Hemorrhagic stroke | Male   | Early Neonatal | 80 plus | Global     | -1        | LDI (IS per capita)                      |
| Hemorrhagic stroke | Male   | Early Neonatal | 80 plus | Global     | -1        | milk adjusted(g)                         |
| Hemorrhagic stroke | Male   | Early Neonatal | 80 plus | Global     | -1        | nuts seeds adjusted(g)                   |
| Hemorrhagic stroke | Male   | Early Neonatal | 80 plus | Global     | -1        | omega 3 adjusted(g)                      |
| Hemorrhagic stroke | Male   | Early Neonatal | 80 plus | Global     | -1        | pufa adjusted(percent)                   |
| Hemorrhagic stroke | Male   | Early Neonatal | 80 plus | Global     | -1        | pulses legumes adjusted(g)               |
| Hemorrhagic stroke | Male   | Early Neonatal | 80 plus | Global     | -1        | vegetables adjusted(g)                   |
| Hemorrhagic stroke | Male   | Early Neonatal | 80 plus | Global     | 0         | Alcohol (litres per capita)              |
| Hemorrhagic stroke | Male   | Early Neonatal | 80 plus | Global     | 0         | Sociodemographic Status                  |
| Hemorrhagic stroke | Male   | Early Neonatal | 80 plus | Global     | 1         | Log-transformed SEV scalar: Hem Stroke   |
| Hemorrhagic stroke | Male   | Early Neonatal | 80 plus | Global     | 1         | Smoking Prevalence                       |
| Hemorrhagic stroke | Male   | Early Neonatal | 80 plus | Data Rich  | -1        | Education (years per capita)             |
| Hemorrhagic stroke | Male   | Early Neonatal | 80 plus | Data Rich  | -1        | LDI (IS per capita)                      |
| Hemorrhagic stroke | Male   | Early Neonatal | 80 plus | Data Rich  | -1        | milk adjusted(g)                         |

**Appendix Table 10: CODEm covariates used, level of covariate, and expected direction of covariate by cause, sex, and age**

| Cause                      | Sex    | Age start      | Age end | Model type | Direction | Covariate                              |
|----------------------------|--------|----------------|---------|------------|-----------|----------------------------------------|
| Hemorrhagic stroke         | Male   | Early Neonatal | 80 plus | Data Rich  | -1        | nuts seeds adjusted(g)                 |
| Hemorrhagic stroke         | Male   | Early Neonatal | 80 plus | Data Rich  | -1        | omega 3 adjusted(g)                    |
| Hemorrhagic stroke         | Male   | Early Neonatal | 80 plus | Data Rich  | -1        | pufa adjusted(percent)                 |
| Hemorrhagic stroke         | Male   | Early Neonatal | 80 plus | Data Rich  | -1        | pulses legumes adjusted(g)             |
| Hemorrhagic stroke         | Male   | Early Neonatal | 80 plus | Data Rich  | -1        | vegetables adjusted(g)                 |
| Hemorrhagic stroke         | Male   | Early Neonatal | 80 plus | Data Rich  | 0         | Alcohol (litres per capita)            |
| Hemorrhagic stroke         | Male   | Early Neonatal | 80 plus | Data Rich  | 0         | Sociodemographic Status                |
| Hemorrhagic stroke         | Male   | Early Neonatal | 80 plus | Data Rich  | 1         | Log-transformed SEV scalar: Hem Stroke |
| Hemorrhagic stroke         | Male   | Early Neonatal | 80 plus | Data Rich  | 1         | Smoking Prevalence                     |
| Hemorrhagic stroke         | Female | Early Neonatal | 80 plus | Global     | -1        | Education (years per capita)           |
| Hemorrhagic stroke         | Female | Early Neonatal | 80 plus | Global     | -1        | LDI (I\$ per capita)                   |
| Hemorrhagic stroke         | Female | Early Neonatal | 80 plus | Global     | -1        | milk adjusted(g)                       |
| Hemorrhagic stroke         | Female | Early Neonatal | 80 plus | Global     | -1        | nuts seeds adjusted(g)                 |
| Hemorrhagic stroke         | Female | Early Neonatal | 80 plus | Global     | -1        | omega 3 adjusted(g)                    |
| Hemorrhagic stroke         | Female | Early Neonatal | 80 plus | Global     | -1        | pufa adjusted(percent)                 |
| Hemorrhagic stroke         | Female | Early Neonatal | 80 plus | Global     | -1        | pulses legumes adjusted(g)             |
| Hemorrhagic stroke         | Female | Early Neonatal | 80 plus | Global     | -1        | vegetables adjusted(g)                 |
| Hemorrhagic stroke         | Female | Early Neonatal | 80 plus | Global     | 0         | Alcohol (litres per capita)            |
| Hemorrhagic stroke         | Female | Early Neonatal | 80 plus | Global     | 0         | Sociodemographic Status                |
| Hemorrhagic stroke         | Female | Early Neonatal | 80 plus | Global     | 1         | Log-transformed SEV scalar: Hem Stroke |
| Hemorrhagic stroke         | Female | Early Neonatal | 80 plus | Global     | 1         | Smoking Prevalence                     |
| Hemorrhagic stroke         | Female | Early Neonatal | 80 plus | Data Rich  | -1        | Education (years per capita)           |
| Hemorrhagic stroke         | Female | Early Neonatal | 80 plus | Data Rich  | -1        | LDI (I\$ per capita)                   |
| Hemorrhagic stroke         | Female | Early Neonatal | 80 plus | Data Rich  | -1        | milk adjusted(g)                       |
| Hemorrhagic stroke         | Female | Early Neonatal | 80 plus | Data Rich  | -1        | nuts seeds adjusted(g)                 |
| Hemorrhagic stroke         | Female | Early Neonatal | 80 plus | Data Rich  | -1        | omega 3 adjusted(g)                    |
| Hemorrhagic stroke         | Female | Early Neonatal | 80 plus | Data Rich  | -1        | pufa adjusted(percent)                 |
| Hemorrhagic stroke         | Female | Early Neonatal | 80 plus | Data Rich  | -1        | pulses legumes adjusted(g)             |
| Hemorrhagic stroke         | Female | Early Neonatal | 80 plus | Data Rich  | -1        | vegetables adjusted(g)                 |
| Hemorrhagic stroke         | Female | Early Neonatal | 80 plus | Data Rich  | 0         | Alcohol (litres per capita)            |
| Hemorrhagic stroke         | Female | Early Neonatal | 80 plus | Data Rich  | 0         | Sociodemographic Status                |
| Hemorrhagic stroke         | Female | Early Neonatal | 80 plus | Data Rich  | 1         | Log-transformed SEV scalar: Hem Stroke |
| Hemorrhagic stroke         | Female | Early Neonatal | 80 plus | Data Rich  | 1         | Smoking Prevalence                     |
| Hypertensive heart disease | Male   | Post Neonatal  | 80 plus | Global     | -1        | Education (years per capita)           |
| Hypertensive heart disease | Male   | Post Neonatal  | 80 plus | Global     | -1        | Elevation Under 100m (proportion)      |
| Hypertensive heart disease | Male   | Post Neonatal  | 80 plus | Global     | -1        | LDI (I\$ per capita)                   |
| Hypertensive heart disease | Male   | Post Neonatal  | 80 plus | Global     | -1        | Sociodemographic Status                |
| Hypertensive heart disease | Male   | Post Neonatal  | 80 plus | Global     | -1        | milk adjusted(g)                       |
| Hypertensive heart disease | Male   | Post Neonatal  | 80 plus | Global     | -1        | nuts seeds adjusted(g)                 |
| Hypertensive heart disease | Male   | Post Neonatal  | 80 plus | Global     | -1        | omega 3 adjusted(g)                    |
| Hypertensive heart disease | Male   | Post Neonatal  | 80 plus | Global     | -1        | pulses legumes adjusted(g)             |
| Hypertensive heart disease | Male   | Post Neonatal  | 80 plus | Global     | -1        | vegetables adjusted(g)                 |
| Hypertensive heart disease | Male   | Post Neonatal  | 80 plus | Global     | 0         | Alcohol (litres per capita)            |
| Hypertensive heart disease | Male   | Post Neonatal  | 80 plus | Global     | 1         | Cumulative Cigarettes (10 Years)       |

**Appendix Table 10: CODEm covariates used, level of covariate, and expected direction of covariate by cause, sex, and age**

| Cause                      | Sex    | Age start     | Age end | Model type | Direction | Covariate                                |
|----------------------------|--------|---------------|---------|------------|-----------|------------------------------------------|
| Hypertensive heart disease | Male   | Post Neonatal | 80 plus | Global     | 1         | Indoor Air Pollution (All Cooking Fuels) |
| Hypertensive heart disease | Male   | Post Neonatal | 80 plus | Global     | 1         | Outdoor Air Pollution (PM2.5)            |
| Hypertensive heart disease | Male   | Post Neonatal | 80 plus | Global     | 1         | Systolic Blood Pressure (mmHg)           |
| Hypertensive heart disease | Male   | Post Neonatal | 80 plus | Global     | 1         | energy unadjusted(kcal)                  |
| Hypertensive heart disease | Male   | Post Neonatal | 80 plus | Data Rich  | -1        | Education (years per capita)             |
| Hypertensive heart disease | Male   | Post Neonatal | 80 plus | Data Rich  | -1        | Elevation Under 100m (proportion)        |
| Hypertensive heart disease | Male   | Post Neonatal | 80 plus | Data Rich  | -1        | LDI (IS per capita)                      |
| Hypertensive heart disease | Male   | Post Neonatal | 80 plus | Data Rich  | -1        | Sociodemographic Status                  |
| Hypertensive heart disease | Male   | Post Neonatal | 80 plus | Data Rich  | -1        | milk adjusted(g)                         |
| Hypertensive heart disease | Male   | Post Neonatal | 80 plus | Data Rich  | -1        | nuts seeds adjusted(g)                   |
| Hypertensive heart disease | Male   | Post Neonatal | 80 plus | Data Rich  | -1        | omega 3 adjusted(g)                      |
| Hypertensive heart disease | Male   | Post Neonatal | 80 plus | Data Rich  | -1        | pulses legumes adjusted(g)               |
| Hypertensive heart disease | Male   | Post Neonatal | 80 plus | Data Rich  | -1        | vegetables adjusted(g)                   |
| Hypertensive heart disease | Male   | Post Neonatal | 80 plus | Data Rich  | 0         | Alcohol (litres per capita)              |
| Hypertensive heart disease | Male   | Post Neonatal | 80 plus | Data Rich  | 1         | Cumulative Cigarettes (10 Years)         |
| Hypertensive heart disease | Male   | Post Neonatal | 80 plus | Data Rich  | 1         | Indoor Air Pollution (All Cooking Fuels) |
| Hypertensive heart disease | Male   | Post Neonatal | 80 plus | Data Rich  | 1         | Outdoor Air Pollution (PM2.5)            |
| Hypertensive heart disease | Male   | Post Neonatal | 80 plus | Data Rich  | 1         | Systolic Blood Pressure (mmHg)           |
| Hypertensive heart disease | Male   | Post Neonatal | 80 plus | Data Rich  | 1         | energy unadjusted(kcal)                  |
| Hypertensive heart disease | Female | Post Neonatal | 80 plus | Global     | -1        | Education (years per capita)             |
| Hypertensive heart disease | Female | Post Neonatal | 80 plus | Global     | -1        | Elevation Under 100m (proportion)        |
| Hypertensive heart disease | Female | Post Neonatal | 80 plus | Global     | -1        | LDI (IS per capita)                      |
| Hypertensive heart disease | Female | Post Neonatal | 80 plus | Global     | -1        | Sociodemographic Status                  |
| Hypertensive heart disease | Female | Post Neonatal | 80 plus | Global     | -1        | milk adjusted(g)                         |
| Hypertensive heart disease | Female | Post Neonatal | 80 plus | Global     | -1        | nuts seeds adjusted(g)                   |
| Hypertensive heart disease | Female | Post Neonatal | 80 plus | Global     | -1        | omega 3 adjusted(g)                      |
| Hypertensive heart disease | Female | Post Neonatal | 80 plus | Global     | -1        | pulses legumes adjusted(g)               |
| Hypertensive heart disease | Female | Post Neonatal | 80 plus | Global     | -1        | vegetables adjusted(g)                   |
| Hypertensive heart disease | Female | Post Neonatal | 80 plus | Global     | 0         | Alcohol (litres per capita)              |
| Hypertensive heart disease | Female | Post Neonatal | 80 plus | Global     | 1         | Cumulative Cigarettes (10 Years)         |
| Hypertensive heart disease | Female | Post Neonatal | 80 plus | Global     | 1         | Indoor Air Pollution (All Cooking Fuels) |
| Hypertensive heart disease | Female | Post Neonatal | 80 plus | Global     | 1         | Outdoor Air Pollution (PM2.5)            |
| Hypertensive heart disease | Female | Post Neonatal | 80 plus | Global     | 1         | Systolic Blood Pressure (mmHg)           |
| Hypertensive heart disease | Female | Post Neonatal | 80 plus | Global     | 1         | energy unadjusted(kcal)                  |
| Hypertensive heart disease | Female | Post Neonatal | 80 plus | Data Rich  | -1        | Education (years per capita)             |
| Hypertensive heart disease | Female | Post Neonatal | 80 plus | Data Rich  | -1        | Elevation Under 100m (proportion)        |
| Hypertensive heart disease | Female | Post Neonatal | 80 plus | Data Rich  | -1        | LDI (IS per capita)                      |
| Hypertensive heart disease | Female | Post Neonatal | 80 plus | Data Rich  | -1        | Sociodemographic Status                  |
| Hypertensive heart disease | Female | Post Neonatal | 80 plus | Data Rich  | -1        | milk adjusted(g)                         |
| Hypertensive heart disease | Female | Post Neonatal | 80 plus | Data Rich  | -1        | nuts seeds adjusted(g)                   |
| Hypertensive heart disease | Female | Post Neonatal | 80 plus | Data Rich  | -1        | omega 3 adjusted(g)                      |
| Hypertensive heart disease | Female | Post Neonatal | 80 plus | Data Rich  | -1        | pulses legumes adjusted(g)               |
| Hypertensive heart disease | Female | Post Neonatal | 80 plus | Data Rich  | -1        | vegetables adjusted(g)                   |
| Hypertensive heart disease | Female | Post Neonatal | 80 plus | Data Rich  | 0         | Alcohol (litres per capita)              |

**Appendix Table 10: CODEm covariates used, level of covariate, and expected direction of covariate by cause, sex, and age**

| Cause                          | Sex    | Age start      | Age end | Model type | Direction | Covariate                                         |
|--------------------------------|--------|----------------|---------|------------|-----------|---------------------------------------------------|
| Hypertensive heart disease     | Female | Post Neonatal  | 80 plus | Data Rich  | 1         | Cumulative Cigarettes (10 Years)                  |
| Hypertensive heart disease     | Female | Post Neonatal  | 80 plus | Data Rich  | 1         | Indoor Air Pollution (All Cooking Fuels)          |
| Hypertensive heart disease     | Female | Post Neonatal  | 80 plus | Data Rich  | 1         | Outdoor Air Pollution (PM2.5)                     |
| Hypertensive heart disease     | Female | Post Neonatal  | 80 plus | Data Rich  | 1         | Systolic Blood Pressure (mmHg)                    |
| Hypertensive heart disease     | Female | Post Neonatal  | 80 plus | Data Rich  | 1         | energy unadjusted(kcal)                           |
| Cardiomyopathy and myocarditis | Male   | Early Neonatal | 80 plus | Global     | -1        | Education (years per capita)                      |
| Cardiomyopathy and myocarditis | Male   | Early Neonatal | 80 plus | Global     | -1        | Health System Access 2 (unitless)                 |
| Cardiomyopathy and myocarditis | Male   | Early Neonatal | 80 plus | Global     | -1        | LDI (IS per capita)                               |
| Cardiomyopathy and myocarditis | Male   | Early Neonatal | 80 plus | Global     | 0         | Alcohol (litres per capita)                       |
| Cardiomyopathy and myocarditis | Male   | Early Neonatal | 80 plus | Global     | 0         | Sociodemographic Status                           |
| Cardiomyopathy and myocarditis | Male   | Early Neonatal | 80 plus | Global     | 1         | Diabetes Age-Standardised Prevalence (proportion) |
| Cardiomyopathy and myocarditis | Male   | Early Neonatal | 80 plus | Global     | 1         | Log-transformed SEV scalar: CMP                   |
| Cardiomyopathy and myocarditis | Male   | Early Neonatal | 80 plus | Global     | 1         | Systolic Blood Pressure (mmHg)                    |
| Cardiomyopathy and myocarditis | Male   | Early Neonatal | 80 plus | Data Rich  | -1        | Education (years per capita)                      |
| Cardiomyopathy and myocarditis | Male   | Early Neonatal | 80 plus | Data Rich  | -1        | Health System Access 2 (unitless)                 |
| Cardiomyopathy and myocarditis | Male   | Early Neonatal | 80 plus | Data Rich  | -1        | LDI (IS per capita)                               |
| Cardiomyopathy and myocarditis | Male   | Early Neonatal | 80 plus | Data Rich  | 0         | Alcohol (litres per capita)                       |
| Cardiomyopathy and myocarditis | Male   | Early Neonatal | 80 plus | Data Rich  | 0         | Sociodemographic Status                           |
| Cardiomyopathy and myocarditis | Male   | Early Neonatal | 80 plus | Data Rich  | 1         | Diabetes Age-Standardised Prevalence (proportion) |
| Cardiomyopathy and myocarditis | Male   | Early Neonatal | 80 plus | Data Rich  | 1         | Log-transformed SEV scalar: CMP                   |
| Cardiomyopathy and myocarditis | Male   | Early Neonatal | 80 plus | Data Rich  | 1         | Systolic Blood Pressure (mmHg)                    |
| Cardiomyopathy and myocarditis | Female | Early Neonatal | 80 plus | Global     | -1        | Education (years per capita)                      |
| Cardiomyopathy and myocarditis | Female | Early Neonatal | 80 plus | Global     | -1        | Health System Access 2 (unitless)                 |
| Cardiomyopathy and myocarditis | Female | Early Neonatal | 80 plus | Global     | -1        | LDI (IS per capita)                               |
| Cardiomyopathy and myocarditis | Female | Early Neonatal | 80 plus | Global     | 0         | Alcohol (litres per capita)                       |
| Cardiomyopathy and myocarditis | Female | Early Neonatal | 80 plus | Global     | 0         | Sociodemographic Status                           |
| Cardiomyopathy and myocarditis | Female | Early Neonatal | 80 plus | Global     | 1         | Diabetes Age-Standardised Prevalence (proportion) |
| Cardiomyopathy and myocarditis | Female | Early Neonatal | 80 plus | Global     | 1         | Log-transformed SEV scalar: CMP                   |
| Cardiomyopathy and myocarditis | Female | Early Neonatal | 80 plus | Global     | 1         | Systolic Blood Pressure (mmHg)                    |
| Cardiomyopathy and myocarditis | Female | Early Neonatal | 80 plus | Data Rich  | -1        | Education (years per capita)                      |
| Cardiomyopathy and myocarditis | Female | Early Neonatal | 80 plus | Data Rich  | -1        | Health System Access 2 (unitless)                 |
| Cardiomyopathy and myocarditis | Female | Early Neonatal | 80 plus | Data Rich  | -1        | LDI (IS per capita)                               |
| Cardiomyopathy and myocarditis | Female | Early Neonatal | 80 plus | Data Rich  | 0         | Alcohol (litres per capita)                       |
| Cardiomyopathy and myocarditis | Female | Early Neonatal | 80 plus | Data Rich  | 0         | Sociodemographic Status                           |
| Cardiomyopathy and myocarditis | Female | Early Neonatal | 80 plus | Data Rich  | 1         | Diabetes Age-Standardised Prevalence (proportion) |
| Cardiomyopathy and myocarditis | Female | Early Neonatal | 80 plus | Data Rich  | 1         | Log-transformed SEV scalar: CMP                   |
| Cardiomyopathy and myocarditis | Female | Early Neonatal | 80 plus | Data Rich  | 1         | Systolic Blood Pressure (mmHg)                    |
| Aortic aneurysm                | Male   | 15 to 19       | 80 plus | Global     | -1        | Education (years per capita)                      |
| Aortic aneurysm                | Male   | 15 to 19       | 80 plus | Global     | -1        | Health System Access 2 (unitless)                 |
| Aortic aneurysm                | Male   | 15 to 19       | 80 plus | Global     | -1        | LDI (IS per capita)                               |
| Aortic aneurysm                | Male   | 15 to 19       | 80 plus | Global     | -1        | fruits adjusted(g)                                |
| Aortic aneurysm                | Male   | 15 to 19       | 80 plus | Global     | -1        | vegetables adjusted(g)                            |
| Aortic aneurysm                | Male   | 15 to 19       | 80 plus | Global     | -1        | whole grains adjusted(g)                          |
| Aortic aneurysm                | Male   | 15 to 19       | 80 plus | Global     | 0         | Alcohol (litres per capita)                       |

**Appendix Table 10: CODEm covariates used, level of covariate, and expected direction of covariate by cause, sex, and age**

| Cause           | Sex    | Age start | Age end | Model type | Direction | Covariate                                         |
|-----------------|--------|-----------|---------|------------|-----------|---------------------------------------------------|
| Aortic aneurysm | Male   | 15 to 19  | 80 plus | Global     | 0         | Sociodemographic Status                           |
| Aortic aneurysm | Male   | 15 to 19  | 80 plus | Global     | 1         | Cholesterol (total, mean per capita)              |
| Aortic aneurysm | Male   | 15 to 19  | 80 plus | Global     | 1         | Cumulative Cigarettes (5 Years)                   |
| Aortic aneurysm | Male   | 15 to 19  | 80 plus | Global     | 1         | Diabetes Age-Standardised Prevalence (proportion) |
| Aortic aneurysm | Male   | 15 to 19  | 80 plus | Global     | 1         | Indoor Air Pollution (All Cooking Fuels)          |
| Aortic aneurysm | Male   | 15 to 19  | 80 plus | Global     | 1         | Log-transformed SEV scalar: Aort An               |
| Aortic aneurysm | Male   | 15 to 19  | 80 plus | Global     | 1         | Mean BMI                                          |
| Aortic aneurysm | Male   | 15 to 19  | 80 plus | Global     | 1         | Outdoor Air Pollution (PM2.5)                     |
| Aortic aneurysm | Male   | 15 to 19  | 80 plus | Global     | 1         | Systolic Blood Pressure (mmHg)                    |
| Aortic aneurysm | Male   | 15 to 19  | 80 plus | Global     | 1         | red meats adjusted(g)                             |
| Aortic aneurysm | Male   | 15 to 19  | 80 plus | Data Rich  | -1        | Education (years per capita)                      |
| Aortic aneurysm | Male   | 15 to 19  | 80 plus | Data Rich  | -1        | Health System Access 2 (unitless)                 |
| Aortic aneurysm | Male   | 15 to 19  | 80 plus | Data Rich  | -1        | LDI (I\$ per capita)                              |
| Aortic aneurysm | Male   | 15 to 19  | 80 plus | Data Rich  | -1        | fruits adjusted(g)                                |
| Aortic aneurysm | Male   | 15 to 19  | 80 plus | Data Rich  | -1        | vegetables adjusted(g)                            |
| Aortic aneurysm | Male   | 15 to 19  | 80 plus | Data Rich  | -1        | whole grains adjusted(g)                          |
| Aortic aneurysm | Male   | 15 to 19  | 80 plus | Data Rich  | 0         | Alcohol (litres per capita)                       |
| Aortic aneurysm | Male   | 15 to 19  | 80 plus | Data Rich  | 0         | Sociodemographic Status                           |
| Aortic aneurysm | Male   | 15 to 19  | 80 plus | Data Rich  | 1         | Cholesterol (total, mean per capita)              |
| Aortic aneurysm | Male   | 15 to 19  | 80 plus | Data Rich  | 1         | Cumulative Cigarettes (5 Years)                   |
| Aortic aneurysm | Male   | 15 to 19  | 80 plus | Data Rich  | 1         | Diabetes Age-Standardised Prevalence (proportion) |
| Aortic aneurysm | Male   | 15 to 19  | 80 plus | Data Rich  | 1         | Indoor Air Pollution (All Cooking Fuels)          |
| Aortic aneurysm | Male   | 15 to 19  | 80 plus | Data Rich  | 1         | Log-transformed SEV scalar: Aort An               |
| Aortic aneurysm | Male   | 15 to 19  | 80 plus | Data Rich  | 1         | Mean BMI                                          |
| Aortic aneurysm | Male   | 15 to 19  | 80 plus | Data Rich  | 1         | Outdoor Air Pollution (PM2.5)                     |
| Aortic aneurysm | Male   | 15 to 19  | 80 plus | Data Rich  | 1         | Systolic Blood Pressure (mmHg)                    |
| Aortic aneurysm | Male   | 15 to 19  | 80 plus | Data Rich  | 1         | red meats adjusted(g)                             |
| Aortic aneurysm | Female | 15 to 19  | 80 plus | Global     | -1        | Education (years per capita)                      |
| Aortic aneurysm | Female | 15 to 19  | 80 plus | Global     | -1        | Health System Access 2 (unitless)                 |
| Aortic aneurysm | Female | 15 to 19  | 80 plus | Global     | -1        | LDI (I\$ per capita)                              |
| Aortic aneurysm | Female | 15 to 19  | 80 plus | Global     | -1        | fruits adjusted(g)                                |
| Aortic aneurysm | Female | 15 to 19  | 80 plus | Global     | -1        | vegetables adjusted(g)                            |
| Aortic aneurysm | Female | 15 to 19  | 80 plus | Global     | -1        | whole grains adjusted(g)                          |
| Aortic aneurysm | Female | 15 to 19  | 80 plus | Global     | 0         | Alcohol (litres per capita)                       |
| Aortic aneurysm | Female | 15 to 19  | 80 plus | Global     | 0         | Sociodemographic Status                           |
| Aortic aneurysm | Female | 15 to 19  | 80 plus | Global     | 1         | Cholesterol (total, mean per capita)              |
| Aortic aneurysm | Female | 15 to 19  | 80 plus | Global     | 1         | Cumulative Cigarettes (5 Years)                   |
| Aortic aneurysm | Female | 15 to 19  | 80 plus | Global     | 1         | Diabetes Age-Standardised Prevalence (proportion) |
| Aortic aneurysm | Female | 15 to 19  | 80 plus | Global     | 1         | Indoor Air Pollution (All Cooking Fuels)          |
| Aortic aneurysm | Female | 15 to 19  | 80 plus | Global     | 1         | Log-transformed SEV scalar: Aort An               |
| Aortic aneurysm | Female | 15 to 19  | 80 plus | Global     | 1         | Mean BMI                                          |
| Aortic aneurysm | Female | 15 to 19  | 80 plus | Global     | 1         | Outdoor Air Pollution (PM2.5)                     |
| Aortic aneurysm | Female | 15 to 19  | 80 plus | Global     | 1         | Systolic Blood Pressure (mmHg)                    |
| Aortic aneurysm | Female | 15 to 19  | 80 plus | Global     | 1         | red meats adjusted(g)                             |



**Appendix Table 10: CODEm covariates used, level of covariate, and expected direction of covariate by cause, sex, and age**

| Cause                       | Sex    | Age start | Age end | Model type | Direction | Covariate                                         |
|-----------------------------|--------|-----------|---------|------------|-----------|---------------------------------------------------|
| Aortic aneurysm             | Female | 15 to 19  | 80 plus | Data Rich  | -1        | Education (years per capita)                      |
| Aortic aneurysm             | Female | 15 to 19  | 80 plus | Data Rich  | -1        | Health System Access 2 (unitless)                 |
| Aortic aneurysm             | Female | 15 to 19  | 80 plus | Data Rich  | -1        | LDI (IS per capita)                               |
| Aortic aneurysm             | Female | 15 to 19  | 80 plus | Data Rich  | -1        | fruits adjusted(g)                                |
| Aortic aneurysm             | Female | 15 to 19  | 80 plus | Data Rich  | -1        | vegetables adjusted(g)                            |
| Aortic aneurysm             | Female | 15 to 19  | 80 plus | Data Rich  | -1        | whole grains adjusted(g)                          |
| Aortic aneurysm             | Female | 15 to 19  | 80 plus | Data Rich  | 0         | Alcohol (litres per capita)                       |
| Aortic aneurysm             | Female | 15 to 19  | 80 plus | Data Rich  | 0         | Sociodemographic Status                           |
| Aortic aneurysm             | Female | 15 to 19  | 80 plus | Data Rich  | 1         | Cholesterol (total, mean per capita)              |
| Aortic aneurysm             | Female | 15 to 19  | 80 plus | Data Rich  | 1         | Cumulative Cigarettes (5 Years)                   |
| Aortic aneurysm             | Female | 15 to 19  | 80 plus | Data Rich  | 1         | Diabetes Age-Standardised Prevalence (proportion) |
| Aortic aneurysm             | Female | 15 to 19  | 80 plus | Data Rich  | 1         | Indoor Air Pollution (All Cooking Fuels)          |
| Aortic aneurysm             | Female | 15 to 19  | 80 plus | Data Rich  | 1         | Log-transformed SEV scalar: Aort An               |
| Aortic aneurysm             | Female | 15 to 19  | 80 plus | Data Rich  | 1         | Mean BMI                                          |
| Aortic aneurysm             | Female | 15 to 19  | 80 plus | Data Rich  | 1         | Outdoor Air Pollution (PM2.5)                     |
| Aortic aneurysm             | Female | 15 to 19  | 80 plus | Data Rich  | 1         | Systolic Blood Pressure (mmHg)                    |
| Aortic aneurysm             | Female | 15 to 19  | 80 plus | Data Rich  | 1         | red meats adjusted(g)                             |
| Peripheral vascular disease | Male   | 40 to 44  | 80 plus | Global     | -1        | Education (years per capita)                      |
| Peripheral vascular disease | Male   | 40 to 44  | 80 plus | Global     | -1        | Health System Access 2 (unitless)                 |
| Peripheral vascular disease | Male   | 40 to 44  | 80 plus | Global     | -1        | LDI (IS per capita)                               |
| Peripheral vascular disease | Male   | 40 to 44  | 80 plus | Global     | -1        | fruits adjusted(g)                                |
| Peripheral vascular disease | Male   | 40 to 44  | 80 plus | Global     | -1        | nuts seeds adjusted(g)                            |
| Peripheral vascular disease | Male   | 40 to 44  | 80 plus | Global     | -1        | omega 3 adjusted(g)                               |
| Peripheral vascular disease | Male   | 40 to 44  | 80 plus | Global     | -1        | pufa adjusted(percent)                            |
| Peripheral vascular disease | Male   | 40 to 44  | 80 plus | Global     | -1        | pulses legumes adjusted(g)                        |
| Peripheral vascular disease | Male   | 40 to 44  | 80 plus | Global     | -1        | vegetables adjusted(g)                            |
| Peripheral vascular disease | Male   | 40 to 44  | 80 plus | Global     | -1        | whole grains adjusted(g)                          |
| Peripheral vascular disease | Male   | 40 to 44  | 80 plus | Global     | 0         | Alcohol (litres per capita)                       |
| Peripheral vascular disease | Male   | 40 to 44  | 80 plus | Global     | 0         | Sociodemographic Status                           |
| Peripheral vascular disease | Male   | 40 to 44  | 80 plus | Global     | 1         | Cholesterol (total, mean per capita)              |
| Peripheral vascular disease | Male   | 40 to 44  | 80 plus | Global     | 1         | Cumulative Cigarettes (10 Years)                  |
| Peripheral vascular disease | Male   | 40 to 44  | 80 plus | Global     | 1         | Diabetes Age-Standardised Prevalence (proportion) |
| Peripheral vascular disease | Male   | 40 to 44  | 80 plus | Global     | 1         | Indoor Air Pollution (All Cooking Fuels)          |
| Peripheral vascular disease | Male   | 40 to 44  | 80 plus | Global     | 1         | Log-transformed SEV scalar: PVD                   |
| Peripheral vascular disease | Male   | 40 to 44  | 80 plus | Global     | 1         | Mean BMI                                          |
| Peripheral vascular disease | Male   | 40 to 44  | 80 plus | Global     | 1         | Outdoor Air Pollution (PM2.5)                     |
| Peripheral vascular disease | Male   | 40 to 44  | 80 plus | Global     | 1         | Smoking Prevalence                                |
| Peripheral vascular disease | Male   | 40 to 44  | 80 plus | Global     | 1         | Systolic Blood Pressure (mmHg)                    |
| Peripheral vascular disease | Male   | 40 to 44  | 80 plus | Global     | 1         | Tobacco (cigarettes per capita)                   |
| Peripheral vascular disease | Male   | 40 to 44  | 80 plus | Global     | 1         | energy unadjusted(kcal)                           |
| Peripheral vascular disease | Male   | 40 to 44  | 80 plus | Global     | 1         | red meats adjusted(g)                             |
| Peripheral vascular disease | Male   | 40 to 44  | 80 plus | Data Rich  | -1        | Education (years per capita)                      |
| Peripheral vascular disease | Male   | 40 to 44  | 80 plus | Data Rich  | -1        | Health System Access 2 (unitless)                 |
| Peripheral vascular disease | Male   | 40 to 44  | 80 plus | Data Rich  | -1        | LDI (IS per capita)                               |

**Appendix Table 10: CODEm covariates used, level of covariate, and expected direction of covariate by cause, sex, and age**

| Cause                       | Sex    | Age start | Age end | Model type | Direction | Covariate                                         |
|-----------------------------|--------|-----------|---------|------------|-----------|---------------------------------------------------|
| Peripheral vascular disease | Male   | 40 to 44  | 80 plus | Data Rich  | -1        | fruits adjusted(g)                                |
| Peripheral vascular disease | Male   | 40 to 44  | 80 plus | Data Rich  | -1        | nuts seeds adjusted(g)                            |
| Peripheral vascular disease | Male   | 40 to 44  | 80 plus | Data Rich  | -1        | omega 3 adjusted(g)                               |
| Peripheral vascular disease | Male   | 40 to 44  | 80 plus | Data Rich  | -1        | pufa adjusted(percent)                            |
| Peripheral vascular disease | Male   | 40 to 44  | 80 plus | Data Rich  | -1        | pulses legumes adjusted(g)                        |
| Peripheral vascular disease | Male   | 40 to 44  | 80 plus | Data Rich  | -1        | vegetables adjusted(g)                            |
| Peripheral vascular disease | Male   | 40 to 44  | 80 plus | Data Rich  | -1        | whole grains adjusted(g)                          |
| Peripheral vascular disease | Male   | 40 to 44  | 80 plus | Data Rich  | 0         | Alcohol (litres per capita)                       |
| Peripheral vascular disease | Male   | 40 to 44  | 80 plus | Data Rich  | 0         | Sociodemographic Status                           |
| Peripheral vascular disease | Male   | 40 to 44  | 80 plus | Data Rich  | 1         | Cholesterol (total, mean per capita)              |
| Peripheral vascular disease | Male   | 40 to 44  | 80 plus | Data Rich  | 1         | Cumulative Cigarettes (10 Years)                  |
| Peripheral vascular disease | Male   | 40 to 44  | 80 plus | Data Rich  | 1         | Diabetes Age-Standardised Prevalence (proportion) |
| Peripheral vascular disease | Male   | 40 to 44  | 80 plus | Data Rich  | 1         | Indoor Air Pollution (All Cooking Fuels)          |
| Peripheral vascular disease | Male   | 40 to 44  | 80 plus | Data Rich  | 1         | Log-transformed SEV scalar: PVD                   |
| Peripheral vascular disease | Male   | 40 to 44  | 80 plus | Data Rich  | 1         | Mean BMI                                          |
| Peripheral vascular disease | Male   | 40 to 44  | 80 plus | Data Rich  | 1         | Outdoor Air Pollution (PM2.5)                     |
| Peripheral vascular disease | Male   | 40 to 44  | 80 plus | Data Rich  | 1         | Smoking Prevalence                                |
| Peripheral vascular disease | Male   | 40 to 44  | 80 plus | Data Rich  | 1         | Systolic Blood Pressure (mmHg)                    |
| Peripheral vascular disease | Male   | 40 to 44  | 80 plus | Data Rich  | 1         | Tobacco (cigarettes per capita)                   |
| Peripheral vascular disease | Male   | 40 to 44  | 80 plus | Data Rich  | 1         | energy unadjusted(kcal)                           |
| Peripheral vascular disease | Male   | 40 to 44  | 80 plus | Data Rich  | 1         | red meats adjusted(g)                             |
| Peripheral vascular disease | Female | 40 to 44  | 80 plus | Global     | -1        | Education (years per capita)                      |
| Peripheral vascular disease | Female | 40 to 44  | 80 plus | Global     | -1        | Health System Access 2 (unitless)                 |
| Peripheral vascular disease | Female | 40 to 44  | 80 plus | Global     | -1        | LDI (IS per capita)                               |
| Peripheral vascular disease | Female | 40 to 44  | 80 plus | Global     | -1        | fruits adjusted(g)                                |
| Peripheral vascular disease | Female | 40 to 44  | 80 plus | Global     | -1        | nuts seeds adjusted(g)                            |
| Peripheral vascular disease | Female | 40 to 44  | 80 plus | Global     | -1        | omega 3 adjusted(g)                               |
| Peripheral vascular disease | Female | 40 to 44  | 80 plus | Global     | -1        | pufa adjusted(percent)                            |
| Peripheral vascular disease | Female | 40 to 44  | 80 plus | Global     | -1        | pulses legumes adjusted(g)                        |
| Peripheral vascular disease | Female | 40 to 44  | 80 plus | Global     | -1        | vegetables adjusted(g)                            |
| Peripheral vascular disease | Female | 40 to 44  | 80 plus | Global     | -1        | whole grains adjusted(g)                          |
| Peripheral vascular disease | Female | 40 to 44  | 80 plus | Global     | 0         | Alcohol (litres per capita)                       |
| Peripheral vascular disease | Female | 40 to 44  | 80 plus | Global     | 0         | Sociodemographic Status                           |
| Peripheral vascular disease | Female | 40 to 44  | 80 plus | Global     | 1         | Cholesterol (total, mean per capita)              |
| Peripheral vascular disease | Female | 40 to 44  | 80 plus | Global     | 1         | Cumulative Cigarettes (10 Years)                  |
| Peripheral vascular disease | Female | 40 to 44  | 80 plus | Global     | 1         | Diabetes Age-Standardised Prevalence (proportion) |
| Peripheral vascular disease | Female | 40 to 44  | 80 plus | Global     | 1         | Indoor Air Pollution (All Cooking Fuels)          |
| Peripheral vascular disease | Female | 40 to 44  | 80 plus | Global     | 1         | Log-transformed SEV scalar: PVD                   |
| Peripheral vascular disease | Female | 40 to 44  | 80 plus | Global     | 1         | Mean BMI                                          |
| Peripheral vascular disease | Female | 40 to 44  | 80 plus | Global     | 1         | Outdoor Air Pollution (PM2.5)                     |
| Peripheral vascular disease | Female | 40 to 44  | 80 plus | Global     | 1         | Smoking Prevalence                                |
| Peripheral vascular disease | Female | 40 to 44  | 80 plus | Global     | 1         | Systolic Blood Pressure (mmHg)                    |
| Peripheral vascular disease | Female | 40 to 44  | 80 plus | Global     | 1         | Tobacco (cigarettes per capita)                   |
| Peripheral vascular disease | Female | 40 to 44  | 80 plus | Global     | 1         | energy unadjusted(kcal)                           |

**Appendix Table 10: CODEm covariates used, level of covariate, and expected direction of covariate by cause, sex, and age**

| Cause                       | Sex    | Age start      | Age end | Model type | Direction | Covariate                                         |
|-----------------------------|--------|----------------|---------|------------|-----------|---------------------------------------------------|
| Peripheral vascular disease | Female | 40 to 44       | 80 plus | Global     | 1         | red meats adjusted(g)                             |
| Peripheral vascular disease | Female | 40 to 44       | 80 plus | Data Rich  | -1        | Education (years per capita)                      |
| Peripheral vascular disease | Female | 40 to 44       | 80 plus | Data Rich  | -1        | Health System Access 2 (unitless)                 |
| Peripheral vascular disease | Female | 40 to 44       | 80 plus | Data Rich  | -1        | LDI (IS per capita)                               |
| Peripheral vascular disease | Female | 40 to 44       | 80 plus | Data Rich  | -1        | fruits adjusted(g)                                |
| Peripheral vascular disease | Female | 40 to 44       | 80 plus | Data Rich  | -1        | nuts seeds adjusted(g)                            |
| Peripheral vascular disease | Female | 40 to 44       | 80 plus | Data Rich  | -1        | omega 3 adjusted(g)                               |
| Peripheral vascular disease | Female | 40 to 44       | 80 plus | Data Rich  | -1        | pufa adjusted(percent)                            |
| Peripheral vascular disease | Female | 40 to 44       | 80 plus | Data Rich  | -1        | pulses legumes adjusted(g)                        |
| Peripheral vascular disease | Female | 40 to 44       | 80 plus | Data Rich  | -1        | vegetables adjusted(g)                            |
| Peripheral vascular disease | Female | 40 to 44       | 80 plus | Data Rich  | -1        | whole grains adjusted(g)                          |
| Peripheral vascular disease | Female | 40 to 44       | 80 plus | Data Rich  | 0         | Alcohol (litres per capita)                       |
| Peripheral vascular disease | Female | 40 to 44       | 80 plus | Data Rich  | 0         | Sociodemographic Status                           |
| Peripheral vascular disease | Female | 40 to 44       | 80 plus | Data Rich  | 1         | Cholesterol (total, mean per capita)              |
| Peripheral vascular disease | Female | 40 to 44       | 80 plus | Data Rich  | 1         | Cumulative Cigarettes (10 Years)                  |
| Peripheral vascular disease | Female | 40 to 44       | 80 plus | Data Rich  | 1         | Diabetes Age-Standardised Prevalence (proportion) |
| Peripheral vascular disease | Female | 40 to 44       | 80 plus | Data Rich  | 1         | Indoor Air Pollution (All Cooking Fuels)          |
| Peripheral vascular disease | Female | 40 to 44       | 80 plus | Data Rich  | 1         | Log-transformed SEV scalar: PVD                   |
| Peripheral vascular disease | Female | 40 to 44       | 80 plus | Data Rich  | 1         | Mean BMI                                          |
| Peripheral vascular disease | Female | 40 to 44       | 80 plus | Data Rich  | 1         | Outdoor Air Pollution (PM2.5)                     |
| Peripheral vascular disease | Female | 40 to 44       | 80 plus | Data Rich  | 1         | Smoking Prevalence                                |
| Peripheral vascular disease | Female | 40 to 44       | 80 plus | Data Rich  | 1         | Systolic Blood Pressure (mmHg)                    |
| Peripheral vascular disease | Female | 40 to 44       | 80 plus | Data Rich  | 1         | Tobacco (cigarettes per capita)                   |
| Peripheral vascular disease | Female | 40 to 44       | 80 plus | Data Rich  | 1         | energy unadjusted(kcal)                           |
| Peripheral vascular disease | Female | 40 to 44       | 80 plus | Data Rich  | 1         | red meats adjusted(g)                             |
| Endocarditis                | Male   | Early Neonatal | 80 plus | Global     | -1        | Education (years per capita)                      |
| Endocarditis                | Male   | Early Neonatal | 80 plus | Global     | -1        | Health System Access 2 (unitless)                 |
| Endocarditis                | Male   | Early Neonatal | 80 plus | Global     | -1        | Improved Water Source (proportion with access)    |
| Endocarditis                | Male   | Early Neonatal | 80 plus | Global     | -1        | LDI (IS per capita)                               |
| Endocarditis                | Male   | Early Neonatal | 80 plus | Global     | -1        | Sanitation (proportion with access)               |
| Endocarditis                | Male   | Early Neonatal | 80 plus | Global     | 0         | Sociodemographic Status                           |
| Endocarditis                | Male   | Early Neonatal | 80 plus | Global     | 1         | Log-transformed SEV scalar: Endocar               |
| Endocarditis                | Male   | Early Neonatal | 80 plus | Data Rich  | -1        | Education (years per capita)                      |
| Endocarditis                | Male   | Early Neonatal | 80 plus | Data Rich  | -1        | Health System Access 2 (unitless)                 |
| Endocarditis                | Male   | Early Neonatal | 80 plus | Data Rich  | -1        | Improved Water Source (proportion with access)    |
| Endocarditis                | Male   | Early Neonatal | 80 plus | Data Rich  | -1        | LDI (IS per capita)                               |
| Endocarditis                | Male   | Early Neonatal | 80 plus | Data Rich  | -1        | Sanitation (proportion with access)               |
| Endocarditis                | Male   | Early Neonatal | 80 plus | Data Rich  | 0         | Sociodemographic Status                           |
| Endocarditis                | Male   | Early Neonatal | 80 plus | Data Rich  | 1         | Log-transformed SEV scalar: Endocar               |
| Endocarditis                | Female | Early Neonatal | 80 plus | Global     | -1        | Education (years per capita)                      |
| Endocarditis                | Female | Early Neonatal | 80 plus | Global     | -1        | Health System Access 2 (unitless)                 |
| Endocarditis                | Female | Early Neonatal | 80 plus | Global     | -1        | Improved Water Source (proportion with access)    |
| Endocarditis                | Female | Early Neonatal | 80 plus | Global     | -1        | LDI (IS per capita)                               |
| Endocarditis                | Female | Early Neonatal | 80 plus | Global     | -1        | Sanitation (proportion with access)               |

**Appendix Table 10: CODEm covariates used, level of covariate, and expected direction of covariate by cause, sex, and age**

| Cause                                         | Sex    | Age start      | Age end | Model type | Direction | Covariate                                         |
|-----------------------------------------------|--------|----------------|---------|------------|-----------|---------------------------------------------------|
| Endocarditis                                  | Female | Early Neonatal | 80 plus | Global     | 0         | Sociodemographic Status                           |
| Endocarditis                                  | Female | Early Neonatal | 80 plus | Global     | 1         | Log-transformed SEV scalar: Endocar               |
| Endocarditis                                  | Female | Early Neonatal | 80 plus | Data Rich  | -1        | Education (years per capita)                      |
| Endocarditis                                  | Female | Early Neonatal | 80 plus | Data Rich  | -1        | Health System Access 2 (unitless)                 |
| Endocarditis                                  | Female | Early Neonatal | 80 plus | Data Rich  | -1        | Improved Water Source (proportion with access)    |
| Endocarditis                                  | Female | Early Neonatal | 80 plus | Data Rich  | -1        | LDI (IS per capita)                               |
| Endocarditis                                  | Female | Early Neonatal | 80 plus | Data Rich  | -1        | Sanitation (proportion with access)               |
| Endocarditis                                  | Female | Early Neonatal | 80 plus | Data Rich  | 0         | Sociodemographic Status                           |
| Endocarditis                                  | Female | Early Neonatal | 80 plus | Data Rich  | 1         | Log-transformed SEV scalar: Endocar               |
| Other cardiovascular and circulatory diseases | Male   | Early Neonatal | 80 plus | Global     | -1        | Education (years per capita)                      |
| Other cardiovascular and circulatory diseases | Male   | Early Neonatal | 80 plus | Global     | -1        | Elevation 100 to 500m (proportion)                |
| Other cardiovascular and circulatory diseases | Male   | Early Neonatal | 80 plus | Global     | -1        | Health System Access 2 (unitless)                 |
| Other cardiovascular and circulatory diseases | Male   | Early Neonatal | 80 plus | Global     | -1        | LDI (IS per capita)                               |
| Other cardiovascular and circulatory diseases | Male   | Early Neonatal | 80 plus | Global     | -1        | Sociodemographic Status                           |
| Other cardiovascular and circulatory diseases | Male   | Early Neonatal | 80 plus | Global     | -1        | Vegetables (kcal per capita)                      |
| Other cardiovascular and circulatory diseases | Male   | Early Neonatal | 80 plus | Global     | -1        | energy unadjusted(kcal)                           |
| Other cardiovascular and circulatory diseases | Male   | Early Neonatal | 80 plus | Global     | -1        | fruits adjusted(g)                                |
| Other cardiovascular and circulatory diseases | Male   | Early Neonatal | 80 plus | Global     | -1        | milk adjusted(g)                                  |
| Other cardiovascular and circulatory diseases | Male   | Early Neonatal | 80 plus | Global     | -1        | nuts seeds adjusted(g)                            |
| Other cardiovascular and circulatory diseases | Male   | Early Neonatal | 80 plus | Global     | -1        | omega 3 adjusted(g)                               |
| Other cardiovascular and circulatory diseases | Male   | Early Neonatal | 80 plus | Global     | -1        | pufa adjusted(percent)                            |
| Other cardiovascular and circulatory diseases | Male   | Early Neonatal | 80 plus | Global     | -1        | pulses legumes adjusted(g)                        |
| Other cardiovascular and circulatory diseases | Male   | Early Neonatal | 80 plus | Global     | -1        | vegetables adjusted(g)                            |
| Other cardiovascular and circulatory diseases | Male   | Early Neonatal | 80 plus | Global     | -1        | whole grains adjusted(g)                          |
| Other cardiovascular and circulatory diseases | Male   | Early Neonatal | 80 plus | Global     | 0         | Alcohol (litres per capita)                       |
| Other cardiovascular and circulatory diseases | Male   | Early Neonatal | 80 plus | Global     | 1         | Animal Fats (kcal per capita)                     |
| Other cardiovascular and circulatory diseases | Male   | Early Neonatal | 80 plus | Global     | 1         | Cholesterol (total, mean per capita)              |
| Other cardiovascular and circulatory diseases | Male   | Early Neonatal | 80 plus | Global     | 1         | Cumulative Cigarettes (10 Years)                  |
| Other cardiovascular and circulatory diseases | Male   | Early Neonatal | 80 plus | Global     | 1         | Diabetes Age-Standardised Prevalence (proportion) |
| Other cardiovascular and circulatory diseases | Male   | Early Neonatal | 80 plus | Global     | 1         | Indoor Air Pollution (All Cooking Fuels)          |
| Other cardiovascular and circulatory diseases | Male   | Early Neonatal | 80 plus | Global     | 1         | Log-transformed SEV scalar: Oth Cardio            |
| Other cardiovascular and circulatory diseases | Male   | Early Neonatal | 80 plus | Global     | 1         | Mean BMI                                          |
| Other cardiovascular and circulatory diseases | Male   | Early Neonatal | 80 plus | Global     | 1         | Outdoor Air Pollution (PM2.5)                     |
| Other cardiovascular and circulatory diseases | Male   | Early Neonatal | 80 plus | Global     | 1         | Smoking Prevalence                                |
| Other cardiovascular and circulatory diseases | Male   | Early Neonatal | 80 plus | Global     | 1         | Systolic Blood Pressure (mmHg)                    |
| Other cardiovascular and circulatory diseases | Male   | Early Neonatal | 80 plus | Global     | 1         | Tobacco (cigarettes per capita)                   |
| Other cardiovascular and circulatory diseases | Male   | Early Neonatal | 80 plus | Global     | 1         | red meats adjusted(g)                             |
| Other cardiovascular and circulatory diseases | Male   | Early Neonatal | 80 plus | Data Rich  | -1        | Education (years per capita)                      |
| Other cardiovascular and circulatory diseases | Male   | Early Neonatal | 80 plus | Data Rich  | -1        | Elevation 100 to 500m (proportion)                |
| Other cardiovascular and circulatory diseases | Male   | Early Neonatal | 80 plus | Data Rich  | -1        | Health System Access 2 (unitless)                 |
| Other cardiovascular and circulatory diseases | Male   | Early Neonatal | 80 plus | Data Rich  | -1        | LDI (IS per capita)                               |
| Other cardiovascular and circulatory diseases | Male   | Early Neonatal | 80 plus | Data Rich  | -1        | Sociodemographic Status                           |
| Other cardiovascular and circulatory diseases | Male   | Early Neonatal | 80 plus | Data Rich  | -1        | energy unadjusted(kcal)                           |
| Other cardiovascular and circulatory diseases | Male   | Early Neonatal | 80 plus | Data Rich  | -1        | fruits adjusted(g)                                |

**Appendix Table 10: CODEm covariates used, level of covariate, and expected direction of covariate by cause, sex, and age**

| Cause                                         | Sex    | Age start      | Age end | Model type | Direction | Covariate                                         |
|-----------------------------------------------|--------|----------------|---------|------------|-----------|---------------------------------------------------|
| Other cardiovascular and circulatory diseases | Male   | Early Neonatal | 80 plus | Data Rich  | -1        | milk adjusted(g)                                  |
| Other cardiovascular and circulatory diseases | Male   | Early Neonatal | 80 plus | Data Rich  | -1        | nuts seeds adjusted(g)                            |
| Other cardiovascular and circulatory diseases | Male   | Early Neonatal | 80 plus | Data Rich  | -1        | omega 3 adjusted(g)                               |
| Other cardiovascular and circulatory diseases | Male   | Early Neonatal | 80 plus | Data Rich  | -1        | pufa adjusted(percent)                            |
| Other cardiovascular and circulatory diseases | Male   | Early Neonatal | 80 plus | Data Rich  | -1        | pulses legumes adjusted(g)                        |
| Other cardiovascular and circulatory diseases | Male   | Early Neonatal | 80 plus | Data Rich  | -1        | vegetables adjusted(g)                            |
| Other cardiovascular and circulatory diseases | Male   | Early Neonatal | 80 plus | Data Rich  | -1        | whole grains adjusted(g)                          |
| Other cardiovascular and circulatory diseases | Male   | Early Neonatal | 80 plus | Data Rich  | 0         | Alcohol (litres per capita)                       |
| Other cardiovascular and circulatory diseases | Male   | Early Neonatal | 80 plus | Data Rich  | 1         | Animal Fats (kcal per capita)                     |
| Other cardiovascular and circulatory diseases | Male   | Early Neonatal | 80 plus | Data Rich  | 1         | Cholesterol (total, mean per capita)              |
| Other cardiovascular and circulatory diseases | Male   | Early Neonatal | 80 plus | Data Rich  | 1         | Cumulative Cigarettes (10 Years)                  |
| Other cardiovascular and circulatory diseases | Male   | Early Neonatal | 80 plus | Data Rich  | 1         | Diabetes Age-Standardised Prevalence (proportion) |
| Other cardiovascular and circulatory diseases | Male   | Early Neonatal | 80 plus | Data Rich  | 1         | Indoor Air Pollution (All Cooking Fuels)          |
| Other cardiovascular and circulatory diseases | Male   | Early Neonatal | 80 plus | Data Rich  | 1         | Log-transformed SEV scalar: Oth Cardio            |
| Other cardiovascular and circulatory diseases | Male   | Early Neonatal | 80 plus | Data Rich  | 1         | Mean BMI                                          |
| Other cardiovascular and circulatory diseases | Male   | Early Neonatal | 80 plus | Data Rich  | 1         | Outdoor Air Pollution (PM2.5)                     |
| Other cardiovascular and circulatory diseases | Male   | Early Neonatal | 80 plus | Data Rich  | 1         | Smoking Prevalence                                |
| Other cardiovascular and circulatory diseases | Male   | Early Neonatal | 80 plus | Data Rich  | 1         | Systolic Blood Pressure (mmHg)                    |
| Other cardiovascular and circulatory diseases | Male   | Early Neonatal | 80 plus | Data Rich  | 1         | Tobacco (cigarettes per capita)                   |
| Other cardiovascular and circulatory diseases | Male   | Early Neonatal | 80 plus | Data Rich  | 1         | red meats adjusted(g)                             |
| Other cardiovascular and circulatory diseases | Female | Early Neonatal | 80 plus | Global     | -1        | Education (years per capita)                      |
| Other cardiovascular and circulatory diseases | Female | Early Neonatal | 80 plus | Global     | -1        | Elevation 100 to 500m (proportion)                |
| Other cardiovascular and circulatory diseases | Female | Early Neonatal | 80 plus | Global     | -1        | Health System Access 2 (unitless)                 |
| Other cardiovascular and circulatory diseases | Female | Early Neonatal | 80 plus | Global     | -1        | LDI (IS per capita)                               |
| Other cardiovascular and circulatory diseases | Female | Early Neonatal | 80 plus | Global     | -1        | Sociodemographic Status                           |
| Other cardiovascular and circulatory diseases | Female | Early Neonatal | 80 plus | Global     | -1        | Vegetables (kcal per capita)                      |
| Other cardiovascular and circulatory diseases | Female | Early Neonatal | 80 plus | Global     | -1        | energy unadjusted(kcal)                           |
| Other cardiovascular and circulatory diseases | Female | Early Neonatal | 80 plus | Global     | -1        | fruits adjusted(g)                                |
| Other cardiovascular and circulatory diseases | Female | Early Neonatal | 80 plus | Global     | -1        | milk adjusted(g)                                  |
| Other cardiovascular and circulatory diseases | Female | Early Neonatal | 80 plus | Global     | -1        | nuts seeds adjusted(g)                            |
| Other cardiovascular and circulatory diseases | Female | Early Neonatal | 80 plus | Global     | -1        | omega 3 adjusted(g)                               |
| Other cardiovascular and circulatory diseases | Female | Early Neonatal | 80 plus | Global     | -1        | pufa adjusted(percent)                            |
| Other cardiovascular and circulatory diseases | Female | Early Neonatal | 80 plus | Global     | -1        | pulses legumes adjusted(g)                        |
| Other cardiovascular and circulatory diseases | Female | Early Neonatal | 80 plus | Global     | -1        | vegetables adjusted(g)                            |
| Other cardiovascular and circulatory diseases | Female | Early Neonatal | 80 plus | Global     | -1        | whole grains adjusted(g)                          |
| Other cardiovascular and circulatory diseases | Female | Early Neonatal | 80 plus | Global     | 0         | Alcohol (litres per capita)                       |
| Other cardiovascular and circulatory diseases | Female | Early Neonatal | 80 plus | Global     | 1         | Animal Fats (kcal per capita)                     |
| Other cardiovascular and circulatory diseases | Female | Early Neonatal | 80 plus | Global     | 1         | Cholesterol (total, mean per capita)              |
| Other cardiovascular and circulatory diseases | Female | Early Neonatal | 80 plus | Global     | 1         | Cumulative Cigarettes (10 Years)                  |
| Other cardiovascular and circulatory diseases | Female | Early Neonatal | 80 plus | Global     | 1         | Diabetes Age-Standardised Prevalence (proportion) |
| Other cardiovascular and circulatory diseases | Female | Early Neonatal | 80 plus | Global     | 1         | Indoor Air Pollution (All Cooking Fuels)          |
| Other cardiovascular and circulatory diseases | Female | Early Neonatal | 80 plus | Global     | 1         | Log-transformed SEV scalar: Oth Cardio            |
| Other cardiovascular and circulatory diseases | Female | Early Neonatal | 80 plus | Global     | 1         | Mean BMI                                          |
| Other cardiovascular and circulatory diseases | Female | Early Neonatal | 80 plus | Global     | 1         | Outdoor Air Pollution (PM2.5)                     |

**Appendix Table 10: CODEm covariates used, level of covariate, and expected direction of covariate by cause, sex, and age**

| Cause                                         | Sex    | Age start      | Age end | Model type | Direction | Covariate                                           |
|-----------------------------------------------|--------|----------------|---------|------------|-----------|-----------------------------------------------------|
| Other cardiovascular and circulatory diseases | Female | Early Neonatal | 80 plus | Global     | 1         | Smoking Prevalence                                  |
| Other cardiovascular and circulatory diseases | Female | Early Neonatal | 80 plus | Global     | 1         | Systolic Blood Pressure (mmHg)                      |
| Other cardiovascular and circulatory diseases | Female | Early Neonatal | 80 plus | Global     | 1         | Tobacco (cigarettes per capita)                     |
| Other cardiovascular and circulatory diseases | Female | Early Neonatal | 80 plus | Global     | 1         | red meats adjusted(g)                               |
| Other cardiovascular and circulatory diseases | Female | Early Neonatal | 80 plus | Data Rich  | -1        | Education (years per capita)                        |
| Other cardiovascular and circulatory diseases | Female | Early Neonatal | 80 plus | Data Rich  | -1        | Elevation 100 to 500m (proportion)                  |
| Other cardiovascular and circulatory diseases | Female | Early Neonatal | 80 plus | Data Rich  | -1        | Health System Access 2 (unitless)                   |
| Other cardiovascular and circulatory diseases | Female | Early Neonatal | 80 plus | Data Rich  | -1        | LDI (IS per capita)                                 |
| Other cardiovascular and circulatory diseases | Female | Early Neonatal | 80 plus | Data Rich  | -1        | Sociodemographic Status                             |
| Other cardiovascular and circulatory diseases | Female | Early Neonatal | 80 plus | Data Rich  | -1        | energy unadjusted(kcal)                             |
| Other cardiovascular and circulatory diseases | Female | Early Neonatal | 80 plus | Data Rich  | -1        | fruits adjusted(g)                                  |
| Other cardiovascular and circulatory diseases | Female | Early Neonatal | 80 plus | Data Rich  | -1        | milk adjusted(g)                                    |
| Other cardiovascular and circulatory diseases | Female | Early Neonatal | 80 plus | Data Rich  | -1        | nuts seeds adjusted(g)                              |
| Other cardiovascular and circulatory diseases | Female | Early Neonatal | 80 plus | Data Rich  | -1        | omega 3 adjusted(g)                                 |
| Other cardiovascular and circulatory diseases | Female | Early Neonatal | 80 plus | Data Rich  | -1        | pufa adjusted(percent)                              |
| Other cardiovascular and circulatory diseases | Female | Early Neonatal | 80 plus | Data Rich  | -1        | pulses legumes adjusted(g)                          |
| Other cardiovascular and circulatory diseases | Female | Early Neonatal | 80 plus | Data Rich  | -1        | vegetables adjusted(g)                              |
| Other cardiovascular and circulatory diseases | Female | Early Neonatal | 80 plus | Data Rich  | -1        | whole grains adjusted(g)                            |
| Other cardiovascular and circulatory diseases | Female | Early Neonatal | 80 plus | Data Rich  | 0         | Alcohol (litres per capita)                         |
| Other cardiovascular and circulatory diseases | Female | Early Neonatal | 80 plus | Data Rich  | 1         | Animal Fats (kcal per capita)                       |
| Other cardiovascular and circulatory diseases | Female | Early Neonatal | 80 plus | Data Rich  | 1         | Cholesterol (total, mean per capita)                |
| Other cardiovascular and circulatory diseases | Female | Early Neonatal | 80 plus | Data Rich  | 1         | Cumulative Cigarettes (10 Years)                    |
| Other cardiovascular and circulatory diseases | Female | Early Neonatal | 80 plus | Data Rich  | 1         | Diabetes Age-Standardised Prevalence (proportion)   |
| Other cardiovascular and circulatory diseases | Female | Early Neonatal | 80 plus | Data Rich  | 1         | Indoor Air Pollution (All Cooking Fuels)            |
| Other cardiovascular and circulatory diseases | Female | Early Neonatal | 80 plus | Data Rich  | 1         | Log-transformed SEV scalar: Oth Cardio              |
| Other cardiovascular and circulatory diseases | Female | Early Neonatal | 80 plus | Data Rich  | 1         | Mean BMI                                            |
| Other cardiovascular and circulatory diseases | Female | Early Neonatal | 80 plus | Data Rich  | 1         | Outdoor Air Pollution (PM2.5)                       |
| Other cardiovascular and circulatory diseases | Female | Early Neonatal | 80 plus | Data Rich  | 1         | Smoking Prevalence                                  |
| Other cardiovascular and circulatory diseases | Female | Early Neonatal | 80 plus | Data Rich  | 1         | Systolic Blood Pressure (mmHg)                      |
| Other cardiovascular and circulatory diseases | Female | Early Neonatal | 80 plus | Data Rich  | 1         | Tobacco (cigarettes per capita)                     |
| Other cardiovascular and circulatory diseases | Female | Early Neonatal | 80 plus | Data Rich  | 1         | red meats adjusted(g)                               |
| Chronic respiratory diseases                  | Male   | Early Neonatal | 80 plus | Global     | -1        | Education (years per capita)                        |
| Chronic respiratory diseases                  | Male   | Early Neonatal | 80 plus | Global     | -1        | Health System Access 2 (unitless)                   |
| Chronic respiratory diseases                  | Male   | Early Neonatal | 80 plus | Global     | -1        | LDI (IS per capita)                                 |
| Chronic respiratory diseases                  | Male   | Early Neonatal | 80 plus | Global     | 0         | Sociodemographic Status                             |
| Chronic respiratory diseases                  | Male   | Early Neonatal | 80 plus | Global     | 1         | Cumulative Cigarettes (5 Years)                     |
| Chronic respiratory diseases                  | Male   | Early Neonatal | 80 plus | Global     | 1         | Elevation 500 to 1500m (proportion)                 |
| Chronic respiratory diseases                  | Male   | Early Neonatal | 80 plus | Global     | 1         | Elevation Over 1500m (proportion)                   |
| Chronic respiratory diseases                  | Male   | Early Neonatal | 80 plus | Global     | 1         | Indoor Air Pollution (Biomass Cooking)              |
| Chronic respiratory diseases                  | Male   | Early Neonatal | 80 plus | Global     | 1         | Indoor Air Pollution (Coal Cooking)                 |
| Chronic respiratory diseases                  | Male   | Early Neonatal | 80 plus | Global     | 1         | Outdoor Air Pollution (PM2.5)                       |
| Chronic respiratory diseases                  | Male   | Early Neonatal | 80 plus | Global     | 1         | Population Density (over 1000 ppl/sqkm, proportion) |
| Chronic respiratory diseases                  | Male   | Early Neonatal | 80 plus | Global     | 1         | Smoking Prevalence                                  |
| Chronic respiratory diseases                  | Male   | Early Neonatal | 80 plus | Data Rich  | -1        | Education (years per capita)                        |

**Appendix Table 10: CODEm covariates used, level of covariate, and expected direction of covariate by cause, sex, and age**

| Cause                                 | Sex    | Age start      | Age end | Model type | Direction | Covariate                                           |
|---------------------------------------|--------|----------------|---------|------------|-----------|-----------------------------------------------------|
| Chronic respiratory diseases          | Male   | Early Neonatal | 80 plus | Data Rich  | -1        | Health System Access 2 (unitless)                   |
| Chronic respiratory diseases          | Male   | Early Neonatal | 80 plus | Data Rich  | -1        | LDI (IS per capita)                                 |
| Chronic respiratory diseases          | Male   | Early Neonatal | 80 plus | Data Rich  | 0         | Sociodemographic Status                             |
| Chronic respiratory diseases          | Male   | Early Neonatal | 80 plus | Data Rich  | 1         | Cumulative Cigarettes (10 Years)                    |
| Chronic respiratory diseases          | Male   | Early Neonatal | 80 plus | Data Rich  | 1         | Cumulative Cigarettes (5 Years)                     |
| Chronic respiratory diseases          | Male   | Early Neonatal | 80 plus | Data Rich  | 1         | Elevation 500 to 1500m (proportion)                 |
| Chronic respiratory diseases          | Male   | Early Neonatal | 80 plus | Data Rich  | 1         | Elevation Over 1500m (proportion)                   |
| Chronic respiratory diseases          | Male   | Early Neonatal | 80 plus | Data Rich  | 1         | Indoor Air Pollution (Biomass Cooking)              |
| Chronic respiratory diseases          | Male   | Early Neonatal | 80 plus | Data Rich  | 1         | Indoor Air Pollution (Coal Cooking)                 |
| Chronic respiratory diseases          | Male   | Early Neonatal | 80 plus | Data Rich  | 1         | Log-transformed SEV scalar: Chr Resp                |
| Chronic respiratory diseases          | Male   | Early Neonatal | 80 plus | Data Rich  | 1         | Outdoor Air Pollution (PM2.5)                       |
| Chronic respiratory diseases          | Male   | Early Neonatal | 80 plus | Data Rich  | 1         | Population Density (over 1000 ppl/sqkm, proportion) |
| Chronic respiratory diseases          | Male   | Early Neonatal | 80 plus | Data Rich  | 1         | Smoking Prevalence                                  |
| Chronic respiratory diseases          | Female | Early Neonatal | 80 plus | Global     | -1        | Education (years per capita)                        |
| Chronic respiratory diseases          | Female | Early Neonatal | 80 plus | Global     | -1        | Health System Access 2 (unitless)                   |
| Chronic respiratory diseases          | Female | Early Neonatal | 80 plus | Global     | -1        | LDI (IS per capita)                                 |
| Chronic respiratory diseases          | Female | Early Neonatal | 80 plus | Global     | 0         | Sociodemographic Status                             |
| Chronic respiratory diseases          | Female | Early Neonatal | 80 plus | Global     | 1         | Cumulative Cigarettes (10 Years)                    |
| Chronic respiratory diseases          | Female | Early Neonatal | 80 plus | Global     | 1         | Cumulative Cigarettes (5 Years)                     |
| Chronic respiratory diseases          | Female | Early Neonatal | 80 plus | Global     | 1         | Elevation 500 to 1500m (proportion)                 |
| Chronic respiratory diseases          | Female | Early Neonatal | 80 plus | Global     | 1         | Elevation Over 1500m (proportion)                   |
| Chronic respiratory diseases          | Female | Early Neonatal | 80 plus | Global     | 1         | Indoor Air Pollution (Biomass Cooking)              |
| Chronic respiratory diseases          | Female | Early Neonatal | 80 plus | Global     | 1         | Indoor Air Pollution (Coal Cooking)                 |
| Chronic respiratory diseases          | Female | Early Neonatal | 80 plus | Global     | 1         | Log-transformed SEV scalar: Chr Resp                |
| Chronic respiratory diseases          | Female | Early Neonatal | 80 plus | Global     | 1         | Outdoor Air Pollution (PM2.5)                       |
| Chronic respiratory diseases          | Female | Early Neonatal | 80 plus | Global     | 1         | Population Density (over 1000 ppl/sqkm, proportion) |
| Chronic respiratory diseases          | Female | Early Neonatal | 80 plus | Global     | 1         | Smoking Prevalence                                  |
| Chronic respiratory diseases          | Female | Early Neonatal | 80 plus | Data Rich  | -1        | Education (years per capita)                        |
| Chronic respiratory diseases          | Female | Early Neonatal | 80 plus | Data Rich  | -1        | Health System Access 2 (unitless)                   |
| Chronic respiratory diseases          | Female | Early Neonatal | 80 plus | Data Rich  | -1        | LDI (IS per capita)                                 |
| Chronic respiratory diseases          | Female | Early Neonatal | 80 plus | Data Rich  | 0         | Sociodemographic Status                             |
| Chronic respiratory diseases          | Female | Early Neonatal | 80 plus | Data Rich  | 1         | Cumulative Cigarettes (10 Years)                    |
| Chronic respiratory diseases          | Female | Early Neonatal | 80 plus | Data Rich  | 1         | Cumulative Cigarettes (5 Years)                     |
| Chronic respiratory diseases          | Female | Early Neonatal | 80 plus | Data Rich  | 1         | Elevation 500 to 1500m (proportion)                 |
| Chronic respiratory diseases          | Female | Early Neonatal | 80 plus | Data Rich  | 1         | Elevation Over 1500m (proportion)                   |
| Chronic respiratory diseases          | Female | Early Neonatal | 80 plus | Data Rich  | 1         | Indoor Air Pollution (Biomass Cooking)              |
| Chronic respiratory diseases          | Female | Early Neonatal | 80 plus | Data Rich  | 1         | Indoor Air Pollution (Coal Cooking)                 |
| Chronic respiratory diseases          | Female | Early Neonatal | 80 plus | Data Rich  | 1         | Log-transformed SEV scalar: Chr Resp                |
| Chronic respiratory diseases          | Female | Early Neonatal | 80 plus | Data Rich  | 1         | Outdoor Air Pollution (PM2.5)                       |
| Chronic respiratory diseases          | Female | Early Neonatal | 80 plus | Data Rich  | 1         | Population Density (over 1000 ppl/sqkm, proportion) |
| Chronic respiratory diseases          | Female | Early Neonatal | 80 plus | Data Rich  | 1         | Smoking Prevalence                                  |
| Chronic obstructive pulmonary disease | Male   | Post Neonatal  | 80 plus | Global     | -1        | Education (years per capita)                        |
| Chronic obstructive pulmonary disease | Male   | Post Neonatal  | 80 plus | Global     | -1        | Health System Access 2 (unitless)                   |
| Chronic obstructive pulmonary disease | Male   | Post Neonatal  | 80 plus | Global     | -1        | LDI (IS per capita)                                 |

**Appendix Table 10: CODEm covariates used, level of covariate, and expected direction of covariate by cause, sex, and age**

| Cause                                 | Sex    | Age start     | Age end | Model type | Direction | Covariate                              |
|---------------------------------------|--------|---------------|---------|------------|-----------|----------------------------------------|
| Chronic obstructive pulmonary disease | Male   | Post Neonatal | 80 plus | Global     | 0         | Sociodemographic Status                |
| Chronic obstructive pulmonary disease | Male   | Post Neonatal | 80 plus | Global     | 1         | Cumulative Cigarettes (10 Years)       |
| Chronic obstructive pulmonary disease | Male   | Post Neonatal | 80 plus | Global     | 1         | Cumulative Cigarettes (5 Years)        |
| Chronic obstructive pulmonary disease | Male   | Post Neonatal | 80 plus | Global     | 1         | Elevation Over 1500m (proportion)      |
| Chronic obstructive pulmonary disease | Male   | Post Neonatal | 80 plus | Global     | 1         | Indoor Air Pollution (Biomass Cooking) |
| Chronic obstructive pulmonary disease | Male   | Post Neonatal | 80 plus | Global     | 1         | Indoor Air Pollution (Coal Cooking)    |
| Chronic obstructive pulmonary disease | Male   | Post Neonatal | 80 plus | Global     | 1         | Outdoor Air Pollution (PM2.5)          |
| Chronic obstructive pulmonary disease | Male   | Post Neonatal | 80 plus | Global     | 1         | Smoking Prevalence                     |
| Chronic obstructive pulmonary disease | Male   | Post Neonatal | 80 plus | Data Rich  | -1        | Education (years per capita)           |
| Chronic obstructive pulmonary disease | Male   | Post Neonatal | 80 plus | Data Rich  | -1        | Health System Access 2 (unitless)      |
| Chronic obstructive pulmonary disease | Male   | Post Neonatal | 80 plus | Data Rich  | -1        | LDI (IS per capita)                    |
| Chronic obstructive pulmonary disease | Male   | Post Neonatal | 80 plus | Data Rich  | 0         | Sociodemographic Status                |
| Chronic obstructive pulmonary disease | Male   | Post Neonatal | 80 plus | Data Rich  | 1         | Cumulative Cigarettes (10 Years)       |
| Chronic obstructive pulmonary disease | Male   | Post Neonatal | 80 plus | Data Rich  | 1         | Cumulative Cigarettes (5 Years)        |
| Chronic obstructive pulmonary disease | Male   | Post Neonatal | 80 plus | Data Rich  | 1         | Elevation Over 1500m (proportion)      |
| Chronic obstructive pulmonary disease | Male   | Post Neonatal | 80 plus | Data Rich  | 1         | Indoor Air Pollution (Biomass Cooking) |
| Chronic obstructive pulmonary disease | Male   | Post Neonatal | 80 plus | Data Rich  | 1         | Indoor Air Pollution (Coal Cooking)    |
| Chronic obstructive pulmonary disease | Male   | Post Neonatal | 80 plus | Data Rich  | 1         | Outdoor Air Pollution (PM2.5)          |
| Chronic obstructive pulmonary disease | Male   | Post Neonatal | 80 plus | Data Rich  | 1         | Smoking Prevalence                     |
| Chronic obstructive pulmonary disease | Female | Post Neonatal | 80 plus | Global     | -1        | Education (years per capita)           |
| Chronic obstructive pulmonary disease | Female | Post Neonatal | 80 plus | Global     | -1        | Health System Access 2 (unitless)      |
| Chronic obstructive pulmonary disease | Female | Post Neonatal | 80 plus | Global     | -1        | LDI (IS per capita)                    |
| Chronic obstructive pulmonary disease | Female | Post Neonatal | 80 plus | Global     | 0         | Sociodemographic Status                |
| Chronic obstructive pulmonary disease | Female | Post Neonatal | 80 plus | Global     | 1         | Cumulative Cigarettes (10 Years)       |
| Chronic obstructive pulmonary disease | Female | Post Neonatal | 80 plus | Global     | 1         | Cumulative Cigarettes (5 Years)        |
| Chronic obstructive pulmonary disease | Female | Post Neonatal | 80 plus | Global     | 1         | Elevation Over 1500m (proportion)      |
| Chronic obstructive pulmonary disease | Female | Post Neonatal | 80 plus | Global     | 1         | Indoor Air Pollution (Biomass Cooking) |
| Chronic obstructive pulmonary disease | Female | Post Neonatal | 80 plus | Global     | 1         | Indoor Air Pollution (Coal Cooking)    |
| Chronic obstructive pulmonary disease | Female | Post Neonatal | 80 plus | Global     | 1         | Outdoor Air Pollution (PM2.5)          |
| Chronic obstructive pulmonary disease | Female | Post Neonatal | 80 plus | Global     | 1         | Smoking Prevalence                     |
| Chronic obstructive pulmonary disease | Female | Post Neonatal | 80 plus | Data Rich  | -1        | Education (years per capita)           |
| Chronic obstructive pulmonary disease | Female | Post Neonatal | 80 plus | Data Rich  | -1        | Health System Access 2 (unitless)      |
| Chronic obstructive pulmonary disease | Female | Post Neonatal | 80 plus | Data Rich  | -1        | LDI (IS per capita)                    |
| Chronic obstructive pulmonary disease | Female | Post Neonatal | 80 plus | Data Rich  | 0         | Sociodemographic Status                |
| Chronic obstructive pulmonary disease | Female | Post Neonatal | 80 plus | Data Rich  | 1         | Cumulative Cigarettes (10 Years)       |
| Chronic obstructive pulmonary disease | Female | Post Neonatal | 80 plus | Data Rich  | 1         | Cumulative Cigarettes (5 Years)        |
| Chronic obstructive pulmonary disease | Female | Post Neonatal | 80 plus | Data Rich  | 1         | Elevation Over 1500m (proportion)      |
| Chronic obstructive pulmonary disease | Female | Post Neonatal | 80 plus | Data Rich  | 1         | Indoor Air Pollution (Biomass Cooking) |
| Chronic obstructive pulmonary disease | Female | Post Neonatal | 80 plus | Data Rich  | 1         | Indoor Air Pollution (Coal Cooking)    |
| Chronic obstructive pulmonary disease | Female | Post Neonatal | 80 plus | Data Rich  | 1         | Outdoor Air Pollution (PM2.5)          |
| Chronic obstructive pulmonary disease | Female | Post Neonatal | 80 plus | Data Rich  | 1         | Smoking Prevalence                     |
| Pneumoconiosis                        | Male   | 1 to 4        | 80 plus | Global     | -1        | Education (years per capita)           |
| Pneumoconiosis                        | Male   | 1 to 4        | 80 plus | Global     | -1        | Health System Access 2 (unitless)      |
| Pneumoconiosis                        | Male   | 1 to 4        | 80 plus | Global     | -1        | LDI (IS per capita)                    |



**Appendix Table 10: CODEm covariates used, level of covariate, and expected direction of covariate by cause, sex, and age**

| Cause          | Sex    | Age start | Age end | Model type | Direction | Covariate                             |
|----------------|--------|-----------|---------|------------|-----------|---------------------------------------|
| Pneumoconiosis | Male   | 1 to 4    | 80 plus | Global     | -1        | Sociodemographic Status               |
| Pneumoconiosis | Male   | 1 to 4    | 80 plus | Global     | 1         | Asbestos production (kg) per capita   |
| Pneumoconiosis | Male   | 1 to 4    | 80 plus | Global     | 1         | Coal Production (per capita)          |
| Pneumoconiosis | Male   | 1 to 4    | 80 plus | Global     | 1         | Coal Reserves (teragrams per capita)  |
| Pneumoconiosis | Male   | 1 to 4    | 80 plus | Global     | 1         | Cumulative Cigarettes (5 Years)       |
| Pneumoconiosis | Male   | 1 to 4    | 80 plus | Global     | 1         | Elevation 500 to 1500m (proportion)   |
| Pneumoconiosis | Male   | 1 to 4    | 80 plus | Global     | 1         | Elevation Over 1500m (proportion)     |
| Pneumoconiosis | Male   | 1 to 4    | 80 plus | Global     | 1         | Gold production (kg) per capita       |
| Pneumoconiosis | Male   | 1 to 4    | 80 plus | Global     | 1         | Log-transformed SEV scalar: Pneumocon |
| Pneumoconiosis | Male   | 1 to 4    | 80 plus | Global     | 1         | Smoking Prevalence                    |
| Pneumoconiosis | Male   | 1 to 4    | 80 plus | Data Rich  | -1        | Education (years per capita)          |
| Pneumoconiosis | Male   | 1 to 4    | 80 plus | Data Rich  | -1        | Health System Access 2 (unitless)     |
| Pneumoconiosis | Male   | 1 to 4    | 80 plus | Data Rich  | -1        | LDI (IS per capita)                   |
| Pneumoconiosis | Male   | 1 to 4    | 80 plus | Data Rich  | -1        | Sociodemographic Status               |
| Pneumoconiosis | Male   | 1 to 4    | 80 plus | Data Rich  | 1         | Asbestos production (kg) per capita   |
| Pneumoconiosis | Male   | 1 to 4    | 80 plus | Data Rich  | 1         | Coal Production (per capita)          |
| Pneumoconiosis | Male   | 1 to 4    | 80 plus | Data Rich  | 1         | Coal Reserves (teragrams per capita)  |
| Pneumoconiosis | Male   | 1 to 4    | 80 plus | Data Rich  | 1         | Cumulative Cigarettes (5 Years)       |
| Pneumoconiosis | Male   | 1 to 4    | 80 plus | Data Rich  | 1         | Elevation 500 to 1500m (proportion)   |
| Pneumoconiosis | Male   | 1 to 4    | 80 plus | Data Rich  | 1         | Elevation Over 1500m (proportion)     |
| Pneumoconiosis | Male   | 1 to 4    | 80 plus | Data Rich  | 1         | Gold production (kg) per capita       |
| Pneumoconiosis | Male   | 1 to 4    | 80 plus | Data Rich  | 1         | Log-transformed SEV scalar: Pneumocon |
| Pneumoconiosis | Male   | 1 to 4    | 80 plus | Data Rich  | 1         | Smoking Prevalence                    |
| Pneumoconiosis | Female | 1 to 4    | 80 plus | Global     | -1        | Education (years per capita)          |
| Pneumoconiosis | Female | 1 to 4    | 80 plus | Global     | -1        | Health System Access 2 (unitless)     |
| Pneumoconiosis | Female | 1 to 4    | 80 plus | Global     | -1        | LDI (IS per capita)                   |
| Pneumoconiosis | Female | 1 to 4    | 80 plus | Global     | -1        | Sociodemographic Status               |
| Pneumoconiosis | Female | 1 to 4    | 80 plus | Global     | 1         | Asbestos production (kg) per capita   |
| Pneumoconiosis | Female | 1 to 4    | 80 plus | Global     | 1         | Coal Production (per capita)          |
| Pneumoconiosis | Female | 1 to 4    | 80 plus | Global     | 1         | Coal Reserves (teragrams per capita)  |
| Pneumoconiosis | Female | 1 to 4    | 80 plus | Global     | 1         | Cumulative Cigarettes (5 Years)       |
| Pneumoconiosis | Female | 1 to 4    | 80 plus | Global     | 1         | Elevation 500 to 1500m (proportion)   |
| Pneumoconiosis | Female | 1 to 4    | 80 plus | Global     | 1         | Elevation Over 1500m (proportion)     |
| Pneumoconiosis | Female | 1 to 4    | 80 plus | Global     | 1         | Gold production (kg) per capita       |
| Pneumoconiosis | Female | 1 to 4    | 80 plus | Global     | 1         | Log-transformed SEV scalar: Pneumocon |
| Pneumoconiosis | Female | 1 to 4    | 80 plus | Global     | 1         | Smoking Prevalence                    |
| Pneumoconiosis | Female | 1 to 4    | 80 plus | Data Rich  | -1        | Education (years per capita)          |
| Pneumoconiosis | Female | 1 to 4    | 80 plus | Data Rich  | -1        | Health System Access 2 (unitless)     |
| Pneumoconiosis | Female | 1 to 4    | 80 plus | Data Rich  | -1        | LDI (IS per capita)                   |
| Pneumoconiosis | Female | 1 to 4    | 80 plus | Data Rich  | -1        | Sociodemographic Status               |
| Pneumoconiosis | Female | 1 to 4    | 80 plus | Data Rich  | 1         | Asbestos production (kg) per capita   |
| Pneumoconiosis | Female | 1 to 4    | 80 plus | Data Rich  | 1         | Coal Production (per capita)          |
| Pneumoconiosis | Female | 1 to 4    | 80 plus | Data Rich  | 1         | Coal Reserves (teragrams per capita)  |
| Pneumoconiosis | Female | 1 to 4    | 80 plus | Data Rich  | 1         | Cumulative Cigarettes (5 Years)       |

**Appendix Table 10: CODEm covariates used, level of covariate, and expected direction of covariate by cause, sex, and age**

| Cause          | Sex    | Age start      | Age end | Model type | Direction | Covariate                                           |
|----------------|--------|----------------|---------|------------|-----------|-----------------------------------------------------|
| Pneumoconiosis | Female | 1 to 4         | 80 plus | Data Rich  | 1         | Elevation 500 to 1500m (proportion)                 |
| Pneumoconiosis | Female | 1 to 4         | 80 plus | Data Rich  | 1         | Elevation Over 1500m (proportion)                   |
| Pneumoconiosis | Female | 1 to 4         | 80 plus | Data Rich  | 1         | Gold production (kg) per capita                     |
| Pneumoconiosis | Female | 1 to 4         | 80 plus | Data Rich  | 1         | Log-transformed SEV scalar: Pneumocon               |
| Pneumoconiosis | Female | 1 to 4         | 80 plus | Data Rich  | 1         | Smoking Prevalence                                  |
| Silicosis      | Male   | Early Neonatal | 80 plus | Global     | -1        | Education (years per capita)                        |
| Silicosis      | Male   | Early Neonatal | 80 plus | Global     | -1        | Health System Access 2 (unitless)                   |
| Silicosis      | Male   | Early Neonatal | 80 plus | Global     | -1        | LDI (IS per capita)                                 |
| Silicosis      | Male   | Early Neonatal | 80 plus | Global     | -1        | Sociodemographic Status                             |
| Silicosis      | Male   | Early Neonatal | 80 plus | Global     | 1         | Asbestos production (binary)                        |
| Silicosis      | Male   | Early Neonatal | 80 plus | Global     | 1         | Asbestos production (kg) per capita                 |
| Silicosis      | Male   | Early Neonatal | 80 plus | Global     | 1         | Cumulative Cigarettes (5 Years)                     |
| Silicosis      | Male   | Early Neonatal | 80 plus | Global     | 1         | Elevation 500 to 1500m (proportion)                 |
| Silicosis      | Male   | Early Neonatal | 80 plus | Global     | 1         | Elevation Over 1500m (proportion)                   |
| Silicosis      | Male   | Early Neonatal | 80 plus | Global     | 1         | Gold production (binary)                            |
| Silicosis      | Male   | Early Neonatal | 80 plus | Global     | 1         | Gold production (kg) per capita                     |
| Silicosis      | Male   | Early Neonatal | 80 plus | Global     | 1         | Indoor Air Pollution (Coal Cooking)                 |
| Silicosis      | Male   | Early Neonatal | 80 plus | Global     | 1         | Log-transformed SEV scalar: Silicosis               |
| Silicosis      | Male   | Early Neonatal | 80 plus | Global     | 1         | Population Density (over 1000 ppl/sqkm, proportion) |
| Silicosis      | Male   | Early Neonatal | 80 plus | Global     | 1         | Smoking Prevalence                                  |
| Silicosis      | Male   | Early Neonatal | 80 plus | Data Rich  | -1        | Education (years per capita)                        |
| Silicosis      | Male   | Early Neonatal | 80 plus | Data Rich  | -1        | Health System Access 2 (unitless)                   |
| Silicosis      | Male   | Early Neonatal | 80 plus | Data Rich  | -1        | LDI (IS per capita)                                 |
| Silicosis      | Male   | Early Neonatal | 80 plus | Data Rich  | -1        | Sociodemographic Status                             |
| Silicosis      | Male   | Early Neonatal | 80 plus | Data Rich  | 1         | Asbestos production (binary)                        |
| Silicosis      | Male   | Early Neonatal | 80 plus | Data Rich  | 1         | Asbestos production (kg) per capita                 |
| Silicosis      | Male   | Early Neonatal | 80 plus | Data Rich  | 1         | Cumulative Cigarettes (5 Years)                     |
| Silicosis      | Male   | Early Neonatal | 80 plus | Data Rich  | 1         | Elevation 500 to 1500m (proportion)                 |
| Silicosis      | Male   | Early Neonatal | 80 plus | Data Rich  | 1         | Elevation Over 1500m (proportion)                   |
| Silicosis      | Male   | Early Neonatal | 80 plus | Data Rich  | 1         | Gold production (binary)                            |
| Silicosis      | Male   | Early Neonatal | 80 plus | Data Rich  | 1         | Gold production (kg) per capita                     |
| Silicosis      | Male   | Early Neonatal | 80 plus | Data Rich  | 1         | Indoor Air Pollution (Coal Cooking)                 |
| Silicosis      | Male   | Early Neonatal | 80 plus | Data Rich  | 1         | Log-transformed SEV scalar: Silicosis               |
| Silicosis      | Male   | Early Neonatal | 80 plus | Data Rich  | 1         | Population Density (over 1000 ppl/sqkm, proportion) |
| Silicosis      | Male   | Early Neonatal | 80 plus | Data Rich  | 1         | Smoking Prevalence                                  |
| Silicosis      | Female | Early Neonatal | 80 plus | Global     | -1        | Education (years per capita)                        |
| Silicosis      | Female | Early Neonatal | 80 plus | Global     | -1        | Health System Access 2 (unitless)                   |
| Silicosis      | Female | Early Neonatal | 80 plus | Global     | -1        | LDI (IS per capita)                                 |
| Silicosis      | Female | Early Neonatal | 80 plus | Global     | -1        | Sociodemographic Status                             |
| Silicosis      | Female | Early Neonatal | 80 plus | Global     | 1         | Asbestos production (binary)                        |
| Silicosis      | Female | Early Neonatal | 80 plus | Global     | 1         | Asbestos production (kg) per capita                 |
| Silicosis      | Female | Early Neonatal | 80 plus | Global     | 1         | Cumulative Cigarettes (5 Years)                     |
| Silicosis      | Female | Early Neonatal | 80 plus | Global     | 1         | Elevation 500 to 1500m (proportion)                 |
| Silicosis      | Female | Early Neonatal | 80 plus | Global     | 1         | Elevation Over 1500m (proportion)                   |

**Appendix Table 10: CODEm covariates used, level of covariate, and expected direction of covariate by cause, sex, and age**

| Cause      | Sex    | Age start      | Age end | Model type | Direction | Covariate                                           |
|------------|--------|----------------|---------|------------|-----------|-----------------------------------------------------|
| Silicosis  | Female | Early Neonatal | 80 plus | Global     | 1         | Gold production (binary)                            |
| Silicosis  | Female | Early Neonatal | 80 plus | Global     | 1         | Gold production (kg) per capita                     |
| Silicosis  | Female | Early Neonatal | 80 plus | Global     | 1         | Indoor Air Pollution (Coal Cooking)                 |
| Silicosis  | Female | Early Neonatal | 80 plus | Global     | 1         | Log-transformed SEV scalar: Silicosis               |
| Silicosis  | Female | Early Neonatal | 80 plus | Global     | 1         | Population Density (over 1000 ppl/sqkm, proportion) |
| Silicosis  | Female | Early Neonatal | 80 plus | Global     | 1         | Smoking Prevalence                                  |
| Silicosis  | Female | Early Neonatal | 80 plus | Data Rich  | -1        | Education (years per capita)                        |
| Silicosis  | Female | Early Neonatal | 80 plus | Data Rich  | -1        | Health System Access 2 (unitless)                   |
| Silicosis  | Female | Early Neonatal | 80 plus | Data Rich  | -1        | LDI (IS per capita)                                 |
| Silicosis  | Female | Early Neonatal | 80 plus | Data Rich  | -1        | Sociodemographic Status                             |
| Silicosis  | Female | Early Neonatal | 80 plus | Data Rich  | 1         | Asbestos production (binary)                        |
| Silicosis  | Female | Early Neonatal | 80 plus | Data Rich  | 1         | Asbestos production (kg) per capita                 |
| Silicosis  | Female | Early Neonatal | 80 plus | Data Rich  | 1         | Cumulative Cigarettes (5 Years)                     |
| Silicosis  | Female | Early Neonatal | 80 plus | Data Rich  | 1         | Elevation 500 to 1500m (proportion)                 |
| Silicosis  | Female | Early Neonatal | 80 plus | Data Rich  | 1         | Elevation Over 1500m (proportion)                   |
| Silicosis  | Female | Early Neonatal | 80 plus | Data Rich  | 1         | Gold production (binary)                            |
| Silicosis  | Female | Early Neonatal | 80 plus | Data Rich  | 1         | Gold production (kg) per capita                     |
| Silicosis  | Female | Early Neonatal | 80 plus | Data Rich  | 1         | Indoor Air Pollution (Coal Cooking)                 |
| Silicosis  | Female | Early Neonatal | 80 plus | Data Rich  | 1         | Log-transformed SEV scalar: Silicosis               |
| Silicosis  | Female | Early Neonatal | 80 plus | Data Rich  | 1         | Population Density (over 1000 ppl/sqkm, proportion) |
| Silicosis  | Female | Early Neonatal | 80 plus | Data Rich  | 1         | Smoking Prevalence                                  |
| Asbestosis | Male   | Early Neonatal | 80 plus | Global     | -1        | Education (years per capita)                        |
| Asbestosis | Male   | Early Neonatal | 80 plus | Global     | -1        | Health System Access 2 (unitless)                   |
| Asbestosis | Male   | Early Neonatal | 80 plus | Global     | -1        | LDI (IS per capita)                                 |
| Asbestosis | Male   | Early Neonatal | 80 plus | Global     | 0         | Sociodemographic Status                             |
| Asbestosis | Male   | Early Neonatal | 80 plus | Global     | 1         | Asbestos production (binary)                        |
| Asbestosis | Male   | Early Neonatal | 80 plus | Global     | 1         | Asbestos production (kg) per capita                 |
| Asbestosis | Male   | Early Neonatal | 80 plus | Global     | 1         | Cumulative Cigarettes (5 Years)                     |
| Asbestosis | Male   | Early Neonatal | 80 plus | Global     | 1         | Elevation 500 to 1500m (proportion)                 |
| Asbestosis | Male   | Early Neonatal | 80 plus | Global     | 1         | Elevation Over 1500m (proportion)                   |
| Asbestosis | Male   | Early Neonatal | 80 plus | Global     | 1         | Gold production (binary)                            |
| Asbestosis | Male   | Early Neonatal | 80 plus | Global     | 1         | Gold production (kg) per capita                     |
| Asbestosis | Male   | Early Neonatal | 80 plus | Global     | 1         | Indoor Air Pollution (Coal Cooking)                 |
| Asbestosis | Male   | Early Neonatal | 80 plus | Global     | 1         | Log-transformed SEV scalar: Asbestosis              |
| Asbestosis | Male   | Early Neonatal | 80 plus | Global     | 1         | Population Density (over 1000 ppl/sqkm, proportion) |
| Asbestosis | Male   | Early Neonatal | 80 plus | Global     | 1         | Smoking Prevalence                                  |
| Asbestosis | Male   | Early Neonatal | 80 plus | Data Rich  | -1        | Education (years per capita)                        |
| Asbestosis | Male   | Early Neonatal | 80 plus | Data Rich  | -1        | Health System Access 2 (unitless)                   |
| Asbestosis | Male   | Early Neonatal | 80 plus | Data Rich  | -1        | LDI (IS per capita)                                 |
| Asbestosis | Male   | Early Neonatal | 80 plus | Data Rich  | 0         | Sociodemographic Status                             |
| Asbestosis | Male   | Early Neonatal | 80 plus | Data Rich  | 1         | Asbestos production (binary)                        |
| Asbestosis | Male   | Early Neonatal | 80 plus | Data Rich  | 1         | Asbestos production (kg) per capita                 |
| Asbestosis | Male   | Early Neonatal | 80 plus | Data Rich  | 1         | Cumulative Cigarettes (5 Years)                     |
| Asbestosis | Male   | Early Neonatal | 80 plus | Data Rich  | 1         | Elevation 500 to 1500m (proportion)                 |

**Appendix Table 10: CODEm covariates used, level of covariate, and expected direction of covariate by cause, sex, and age**

| Cause                       | Sex    | Age start      | Age end | Model type | Direction | Covariate                                           |
|-----------------------------|--------|----------------|---------|------------|-----------|-----------------------------------------------------|
| Asbestosis                  | Male   | Early Neonatal | 80 plus | Data Rich  | 1         | Elevation Over 1500m (proportion)                   |
| Asbestosis                  | Male   | Early Neonatal | 80 plus | Data Rich  | 1         | Gold production (binary)                            |
| Asbestosis                  | Male   | Early Neonatal | 80 plus | Data Rich  | 1         | Gold production (kg) per capita                     |
| Asbestosis                  | Male   | Early Neonatal | 80 plus | Data Rich  | 1         | Indoor Air Pollution (Coal Cooking)                 |
| Asbestosis                  | Male   | Early Neonatal | 80 plus | Data Rich  | 1         | Log-transformed SEV scalar: Asbestosis              |
| Asbestosis                  | Male   | Early Neonatal | 80 plus | Data Rich  | 1         | Population Density (over 1000 ppl/sqkm, proportion) |
| Asbestosis                  | Male   | Early Neonatal | 80 plus | Data Rich  | 1         | Smoking Prevalence                                  |
| Asbestosis                  | Female | Early Neonatal | 80 plus | Global     | -1        | Education (years per capita)                        |
| Asbestosis                  | Female | Early Neonatal | 80 plus | Global     | -1        | Health System Access 2 (unitless)                   |
| Asbestosis                  | Female | Early Neonatal | 80 plus | Global     | -1        | LDI (IS per capita)                                 |
| Asbestosis                  | Female | Early Neonatal | 80 plus | Global     | 0         | Sociodemographic Status                             |
| Asbestosis                  | Female | Early Neonatal | 80 plus | Global     | 1         | Asbestos production (binary)                        |
| Asbestosis                  | Female | Early Neonatal | 80 plus | Global     | 1         | Asbestos production (kg) per capita                 |
| Asbestosis                  | Female | Early Neonatal | 80 plus | Global     | 1         | Cumulative Cigarettes (5 Years)                     |
| Asbestosis                  | Female | Early Neonatal | 80 plus | Global     | 1         | Elevation 500 to 1500m (proportion)                 |
| Asbestosis                  | Female | Early Neonatal | 80 plus | Global     | 1         | Elevation Over 1500m (proportion)                   |
| Asbestosis                  | Female | Early Neonatal | 80 plus | Global     | 1         | Gold production (binary)                            |
| Asbestosis                  | Female | Early Neonatal | 80 plus | Global     | 1         | Gold production (kg) per capita                     |
| Asbestosis                  | Female | Early Neonatal | 80 plus | Global     | 1         | Indoor Air Pollution (Coal Cooking)                 |
| Asbestosis                  | Female | Early Neonatal | 80 plus | Global     | 1         | Log-transformed SEV scalar: Asbestosis              |
| Asbestosis                  | Female | Early Neonatal | 80 plus | Global     | 1         | Population Density (over 1000 ppl/sqkm, proportion) |
| Asbestosis                  | Female | Early Neonatal | 80 plus | Global     | 1         | Smoking Prevalence                                  |
| Asbestosis                  | Female | Early Neonatal | 80 plus | Data Rich  | -1        | Education (years per capita)                        |
| Asbestosis                  | Female | Early Neonatal | 80 plus | Data Rich  | -1        | Health System Access 2 (unitless)                   |
| Asbestosis                  | Female | Early Neonatal | 80 plus | Data Rich  | -1        | LDI (IS per capita)                                 |
| Asbestosis                  | Female | Early Neonatal | 80 plus | Data Rich  | 0         | Sociodemographic Status                             |
| Asbestosis                  | Female | Early Neonatal | 80 plus | Data Rich  | 1         | Asbestos production (binary)                        |
| Asbestosis                  | Female | Early Neonatal | 80 plus | Data Rich  | 1         | Asbestos production (kg) per capita                 |
| Asbestosis                  | Female | Early Neonatal | 80 plus | Data Rich  | 1         | Cumulative Cigarettes (5 Years)                     |
| Asbestosis                  | Female | Early Neonatal | 80 plus | Data Rich  | 1         | Elevation 500 to 1500m (proportion)                 |
| Asbestosis                  | Female | Early Neonatal | 80 plus | Data Rich  | 1         | Elevation Over 1500m (proportion)                   |
| Asbestosis                  | Female | Early Neonatal | 80 plus | Data Rich  | 1         | Gold production (binary)                            |
| Asbestosis                  | Female | Early Neonatal | 80 plus | Data Rich  | 1         | Gold production (kg) per capita                     |
| Asbestosis                  | Female | Early Neonatal | 80 plus | Data Rich  | 1         | Indoor Air Pollution (Coal Cooking)                 |
| Asbestosis                  | Female | Early Neonatal | 80 plus | Data Rich  | 1         | Log-transformed SEV scalar: Asbestosis              |
| Asbestosis                  | Female | Early Neonatal | 80 plus | Data Rich  | 1         | Population Density (over 1000 ppl/sqkm, proportion) |
| Asbestosis                  | Female | Early Neonatal | 80 plus | Data Rich  | 1         | Smoking Prevalence                                  |
| Coal workers pneumoconiosis | Male   | Early Neonatal | 80 plus | Global     | -1        | Education (years per capita)                        |
| Coal workers pneumoconiosis | Male   | Early Neonatal | 80 plus | Global     | -1        | Health System Access 2 (unitless)                   |
| Coal workers pneumoconiosis | Male   | Early Neonatal | 80 plus | Global     | -1        | LDI (IS per capita)                                 |
| Coal workers pneumoconiosis | Male   | Early Neonatal | 80 plus | Global     | -1        | Sociodemographic Status                             |
| Coal workers pneumoconiosis | Male   | Early Neonatal | 80 plus | Global     | 1         | Asbestos production (binary)                        |
| Coal workers pneumoconiosis | Male   | Early Neonatal | 80 plus | Global     | 1         | Asbestos production (kg) per capita                 |
| Coal workers pneumoconiosis | Male   | Early Neonatal | 80 plus | Global     | 1         | Cumulative Cigarettes (5 Years)                     |

**Appendix Table 10: CODEm covariates used, level of covariate, and expected direction of covariate by cause, sex, and age**

| Cause                       | Sex    | Age start      | Age end | Model type | Direction | Covariate                                           |
|-----------------------------|--------|----------------|---------|------------|-----------|-----------------------------------------------------|
| Coal workers pneumoconiosis | Male   | Early Neonatal | 80 plus | Global     | 1         | Elevation 500 to 1500m (proportion)                 |
| Coal workers pneumoconiosis | Male   | Early Neonatal | 80 plus | Global     | 1         | Elevation Over 1500m (proportion)                   |
| Coal workers pneumoconiosis | Male   | Early Neonatal | 80 plus | Global     | 1         | Gold production (binary)                            |
| Coal workers pneumoconiosis | Male   | Early Neonatal | 80 plus | Global     | 1         | Gold production (kg) per capita                     |
| Coal workers pneumoconiosis | Male   | Early Neonatal | 80 plus | Global     | 1         | Indoor Air Pollution (Coal Cooking)                 |
| Coal workers pneumoconiosis | Male   | Early Neonatal | 80 plus | Global     | 1         | Log-transformed SEV scalar: Coal W                  |
| Coal workers pneumoconiosis | Male   | Early Neonatal | 80 plus | Global     | 1         | Population Density (over 1000 ppl/sqkm, proportion) |
| Coal workers pneumoconiosis | Male   | Early Neonatal | 80 plus | Global     | 1         | Smoking Prevalence                                  |
| Coal workers pneumoconiosis | Male   | Early Neonatal | 80 plus | Data Rich  | -1        | Education (years per capita)                        |
| Coal workers pneumoconiosis | Male   | Early Neonatal | 80 plus | Data Rich  | -1        | Health System Access 2 (unitless)                   |
| Coal workers pneumoconiosis | Male   | Early Neonatal | 80 plus | Data Rich  | -1        | LDI (IS per capita)                                 |
| Coal workers pneumoconiosis | Male   | Early Neonatal | 80 plus | Data Rich  | -1        | Sociodemographic Status                             |
| Coal workers pneumoconiosis | Male   | Early Neonatal | 80 plus | Data Rich  | 1         | Asbestos production (binary)                        |
| Coal workers pneumoconiosis | Male   | Early Neonatal | 80 plus | Data Rich  | 1         | Asbestos production (kg) per capita                 |
| Coal workers pneumoconiosis | Male   | Early Neonatal | 80 plus | Data Rich  | 1         | Cumulative Cigarettes (5 Years)                     |
| Coal workers pneumoconiosis | Male   | Early Neonatal | 80 plus | Data Rich  | 1         | Elevation 500 to 1500m (proportion)                 |
| Coal workers pneumoconiosis | Male   | Early Neonatal | 80 plus | Data Rich  | 1         | Elevation Over 1500m (proportion)                   |
| Coal workers pneumoconiosis | Male   | Early Neonatal | 80 plus | Data Rich  | 1         | Gold production (binary)                            |
| Coal workers pneumoconiosis | Male   | Early Neonatal | 80 plus | Data Rich  | 1         | Gold production (kg) per capita                     |
| Coal workers pneumoconiosis | Male   | Early Neonatal | 80 plus | Data Rich  | 1         | Indoor Air Pollution (Coal Cooking)                 |
| Coal workers pneumoconiosis | Male   | Early Neonatal | 80 plus | Data Rich  | 1         | Log-transformed SEV scalar: Coal W                  |
| Coal workers pneumoconiosis | Male   | Early Neonatal | 80 plus | Data Rich  | 1         | Population Density (over 1000 ppl/sqkm, proportion) |
| Coal workers pneumoconiosis | Male   | Early Neonatal | 80 plus | Data Rich  | 1         | Smoking Prevalence                                  |
| Coal workers pneumoconiosis | Female | Early Neonatal | 80 plus | Global     | -1        | Education (years per capita)                        |
| Coal workers pneumoconiosis | Female | Early Neonatal | 80 plus | Global     | -1        | Health System Access 2 (unitless)                   |
| Coal workers pneumoconiosis | Female | Early Neonatal | 80 plus | Global     | -1        | LDI (IS per capita)                                 |
| Coal workers pneumoconiosis | Female | Early Neonatal | 80 plus | Global     | -1        | Sociodemographic Status                             |
| Coal workers pneumoconiosis | Female | Early Neonatal | 80 plus | Global     | 1         | Asbestos production (binary)                        |
| Coal workers pneumoconiosis | Female | Early Neonatal | 80 plus | Global     | 1         | Asbestos production (kg) per capita                 |
| Coal workers pneumoconiosis | Female | Early Neonatal | 80 plus | Global     | 1         | Cumulative Cigarettes (5 Years)                     |
| Coal workers pneumoconiosis | Female | Early Neonatal | 80 plus | Global     | 1         | Elevation 500 to 1500m (proportion)                 |
| Coal workers pneumoconiosis | Female | Early Neonatal | 80 plus | Global     | 1         | Elevation Over 1500m (proportion)                   |
| Coal workers pneumoconiosis | Female | Early Neonatal | 80 plus | Global     | 1         | Gold production (binary)                            |
| Coal workers pneumoconiosis | Female | Early Neonatal | 80 plus | Global     | 1         | Gold production (kg) per capita                     |
| Coal workers pneumoconiosis | Female | Early Neonatal | 80 plus | Global     | 1         | Indoor Air Pollution (Coal Cooking)                 |
| Coal workers pneumoconiosis | Female | Early Neonatal | 80 plus | Global     | 1         | Log-transformed SEV scalar: Coal W                  |
| Coal workers pneumoconiosis | Female | Early Neonatal | 80 plus | Global     | 1         | Population Density (over 1000 ppl/sqkm, proportion) |
| Coal workers pneumoconiosis | Female | Early Neonatal | 80 plus | Global     | 1         | Smoking Prevalence                                  |
| Coal workers pneumoconiosis | Female | Early Neonatal | 80 plus | Data Rich  | -1        | Education (years per capita)                        |
| Coal workers pneumoconiosis | Female | Early Neonatal | 80 plus | Data Rich  | -1        | Health System Access 2 (unitless)                   |
| Coal workers pneumoconiosis | Female | Early Neonatal | 80 plus | Data Rich  | -1        | LDI (IS per capita)                                 |
| Coal workers pneumoconiosis | Female | Early Neonatal | 80 plus | Data Rich  | -1        | Sociodemographic Status                             |
| Coal workers pneumoconiosis | Female | Early Neonatal | 80 plus | Data Rich  | 1         | Asbestos production (binary)                        |
| Coal workers pneumoconiosis | Female | Early Neonatal | 80 plus | Data Rich  | 1         | Asbestos production (kg) per capita                 |

**Appendix Table 10: CODEm covariates used, level of covariate, and expected direction of covariate by cause, sex, and age**

| Cause                       | Sex    | Age start      | Age end | Model type | Direction | Covariate                                           |
|-----------------------------|--------|----------------|---------|------------|-----------|-----------------------------------------------------|
| Coal workers pneumoconiosis | Female | Early Neonatal | 80 plus | Data Rich  | 1         | Cumulative Cigarettes (5 Years)                     |
| Coal workers pneumoconiosis | Female | Early Neonatal | 80 plus | Data Rich  | 1         | Elevation 500 to 1500m (proportion)                 |
| Coal workers pneumoconiosis | Female | Early Neonatal | 80 plus | Data Rich  | 1         | Elevation Over 1500m (proportion)                   |
| Coal workers pneumoconiosis | Female | Early Neonatal | 80 plus | Data Rich  | 1         | Gold production (binary)                            |
| Coal workers pneumoconiosis | Female | Early Neonatal | 80 plus | Data Rich  | 1         | Gold production (kg) per capita                     |
| Coal workers pneumoconiosis | Female | Early Neonatal | 80 plus | Data Rich  | 1         | Indoor Air Pollution (Coal Cooking)                 |
| Coal workers pneumoconiosis | Female | Early Neonatal | 80 plus | Data Rich  | 1         | Log-transformed SEV scalar: Coal W                  |
| Coal workers pneumoconiosis | Female | Early Neonatal | 80 plus | Data Rich  | 1         | Population Density (over 1000 ppl/sqkm, proportion) |
| Coal workers pneumoconiosis | Female | Early Neonatal | 80 plus | Data Rich  | 1         | Smoking Prevalence                                  |
| Other pneumoconiosis        | Male   | Early Neonatal | 80 plus | Global     | -1        | Education (years per capita)                        |
| Other pneumoconiosis        | Male   | Early Neonatal | 80 plus | Global     | -1        | Health System Access 2 (unitless)                   |
| Other pneumoconiosis        | Male   | Early Neonatal | 80 plus | Global     | -1        | LDI (IS per capita)                                 |
| Other pneumoconiosis        | Male   | Early Neonatal | 80 plus | Global     | -1        | Sociodemographic Status                             |
| Other pneumoconiosis        | Male   | Early Neonatal | 80 plus | Global     | 1         | Asbestos production (binary)                        |
| Other pneumoconiosis        | Male   | Early Neonatal | 80 plus | Global     | 1         | Asbestos production (kg) per capita                 |
| Other pneumoconiosis        | Male   | Early Neonatal | 80 plus | Global     | 1         | Cumulative Cigarettes (5 Years)                     |
| Other pneumoconiosis        | Male   | Early Neonatal | 80 plus | Global     | 1         | Elevation 500 to 1500m (proportion)                 |
| Other pneumoconiosis        | Male   | Early Neonatal | 80 plus | Global     | 1         | Elevation Over 1500m (proportion)                   |
| Other pneumoconiosis        | Male   | Early Neonatal | 80 plus | Global     | 1         | Gold production (binary)                            |
| Other pneumoconiosis        | Male   | Early Neonatal | 80 plus | Global     | 1         | Gold production (kg) per capita                     |
| Other pneumoconiosis        | Male   | Early Neonatal | 80 plus | Global     | 1         | Indoor Air Pollution (Coal Cooking)                 |
| Other pneumoconiosis        | Male   | Early Neonatal | 80 plus | Global     | 1         | Log-transformed SEV scalar: Oth Pneum               |
| Other pneumoconiosis        | Male   | Early Neonatal | 80 plus | Global     | 1         | Population Density (over 1000 ppl/sqkm, proportion) |
| Other pneumoconiosis        | Male   | Early Neonatal | 80 plus | Global     | 1         | Smoking Prevalence                                  |
| Other pneumoconiosis        | Male   | Early Neonatal | 80 plus | Data Rich  | -1        | Education (years per capita)                        |
| Other pneumoconiosis        | Male   | Early Neonatal | 80 plus | Data Rich  | -1        | Health System Access 2 (unitless)                   |
| Other pneumoconiosis        | Male   | Early Neonatal | 80 plus | Data Rich  | -1        | LDI (IS per capita)                                 |
| Other pneumoconiosis        | Male   | Early Neonatal | 80 plus | Data Rich  | -1        | Sociodemographic Status                             |
| Other pneumoconiosis        | Male   | Early Neonatal | 80 plus | Data Rich  | 1         | Asbestos production (binary)                        |
| Other pneumoconiosis        | Male   | Early Neonatal | 80 plus | Data Rich  | 1         | Asbestos production (kg) per capita                 |
| Other pneumoconiosis        | Male   | Early Neonatal | 80 plus | Data Rich  | 1         | Cumulative Cigarettes (5 Years)                     |
| Other pneumoconiosis        | Male   | Early Neonatal | 80 plus | Data Rich  | 1         | Elevation 500 to 1500m (proportion)                 |
| Other pneumoconiosis        | Male   | Early Neonatal | 80 plus | Data Rich  | 1         | Elevation Over 1500m (proportion)                   |
| Other pneumoconiosis        | Male   | Early Neonatal | 80 plus | Data Rich  | 1         | Gold production (binary)                            |
| Other pneumoconiosis        | Male   | Early Neonatal | 80 plus | Data Rich  | 1         | Gold production (kg) per capita                     |
| Other pneumoconiosis        | Male   | Early Neonatal | 80 plus | Data Rich  | 1         | Indoor Air Pollution (Coal Cooking)                 |
| Other pneumoconiosis        | Male   | Early Neonatal | 80 plus | Data Rich  | 1         | Log-transformed SEV scalar: Oth Pneum               |
| Other pneumoconiosis        | Male   | Early Neonatal | 80 plus | Data Rich  | 1         | Population Density (over 1000 ppl/sqkm, proportion) |
| Other pneumoconiosis        | Male   | Early Neonatal | 80 plus | Data Rich  | 1         | Smoking Prevalence                                  |
| Other pneumoconiosis        | Female | Early Neonatal | 80 plus | Global     | -1        | Education (years per capita)                        |
| Other pneumoconiosis        | Female | Early Neonatal | 80 plus | Global     | -1        | Health System Access 2 (unitless)                   |
| Other pneumoconiosis        | Female | Early Neonatal | 80 plus | Global     | -1        | LDI (IS per capita)                                 |
| Other pneumoconiosis        | Female | Early Neonatal | 80 plus | Global     | -1        | Sociodemographic Status                             |
| Other pneumoconiosis        | Female | Early Neonatal | 80 plus | Global     | 1         | Asbestos production (binary)                        |

**Appendix Table 10: CODEm covariates used, level of covariate, and expected direction of covariate by cause, sex, and age**

| Cause                | Sex    | Age start      | Age end | Model type | Direction | Covariate                                           |
|----------------------|--------|----------------|---------|------------|-----------|-----------------------------------------------------|
| Other pneumoconiosis | Female | Early Neonatal | 80 plus | Global     | 1         | Asbestos production (kg) per capita                 |
| Other pneumoconiosis | Female | Early Neonatal | 80 plus | Global     | 1         | Cumulative Cigarettes (5 Years)                     |
| Other pneumoconiosis | Female | Early Neonatal | 80 plus | Global     | 1         | Elevation 500 to 1500m (proportion)                 |
| Other pneumoconiosis | Female | Early Neonatal | 80 plus | Global     | 1         | Elevation Over 1500m (proportion)                   |
| Other pneumoconiosis | Female | Early Neonatal | 80 plus | Global     | 1         | Gold production (binary)                            |
| Other pneumoconiosis | Female | Early Neonatal | 80 plus | Global     | 1         | Gold production (kg) per capita                     |
| Other pneumoconiosis | Female | Early Neonatal | 80 plus | Global     | 1         | Indoor Air Pollution (Coal Cooking)                 |
| Other pneumoconiosis | Female | Early Neonatal | 80 plus | Global     | 1         | Log-transformed SEV scalar: Oth Pneum               |
| Other pneumoconiosis | Female | Early Neonatal | 80 plus | Global     | 1         | Population Density (over 1000 ppl/sqkm, proportion) |
| Other pneumoconiosis | Female | Early Neonatal | 80 plus | Global     | 1         | Smoking Prevalence                                  |
| Other pneumoconiosis | Female | Early Neonatal | 80 plus | Data Rich  | -1        | Education (years per capita)                        |
| Other pneumoconiosis | Female | Early Neonatal | 80 plus | Data Rich  | -1        | Health System Access 2 (unitless)                   |
| Other pneumoconiosis | Female | Early Neonatal | 80 plus | Data Rich  | -1        | LDI (IS per capita)                                 |
| Other pneumoconiosis | Female | Early Neonatal | 80 plus | Data Rich  | -1        | Sociodemographic Status                             |
| Other pneumoconiosis | Female | Early Neonatal | 80 plus | Data Rich  | 1         | Asbestos production (binary)                        |
| Other pneumoconiosis | Female | Early Neonatal | 80 plus | Data Rich  | 1         | Asbestos production (kg) per capita                 |
| Other pneumoconiosis | Female | Early Neonatal | 80 plus | Data Rich  | 1         | Cumulative Cigarettes (5 Years)                     |
| Other pneumoconiosis | Female | Early Neonatal | 80 plus | Data Rich  | 1         | Elevation 500 to 1500m (proportion)                 |
| Other pneumoconiosis | Female | Early Neonatal | 80 plus | Data Rich  | 1         | Elevation Over 1500m (proportion)                   |
| Other pneumoconiosis | Female | Early Neonatal | 80 plus | Data Rich  | 1         | Gold production (binary)                            |
| Other pneumoconiosis | Female | Early Neonatal | 80 plus | Data Rich  | 1         | Gold production (kg) per capita                     |
| Other pneumoconiosis | Female | Early Neonatal | 80 plus | Data Rich  | 1         | Indoor Air Pollution (Coal Cooking)                 |
| Other pneumoconiosis | Female | Early Neonatal | 80 plus | Data Rich  | 1         | Log-transformed SEV scalar: Oth Pneum               |
| Other pneumoconiosis | Female | Early Neonatal | 80 plus | Data Rich  | 1         | Population Density (over 1000 ppl/sqkm, proportion) |
| Other pneumoconiosis | Female | Early Neonatal | 80 plus | Data Rich  | 1         | Smoking Prevalence                                  |
| Asthma               | Male   | 1 to 4         | 80 plus | Global     | -1        | Education (years per capita)                        |
| Asthma               | Male   | 1 to 4         | 80 plus | Global     | -1        | Health System Access 2 (unitless)                   |
| Asthma               | Male   | 1 to 4         | 80 plus | Global     | -1        | LDI (IS per capita)                                 |
| Asthma               | Male   | 1 to 4         | 80 plus | Global     | -1        | Sociodemographic Status                             |
| Asthma               | Male   | 1 to 4         | 80 plus | Global     | 1         | Cumulative Cigarettes (10 Years)                    |
| Asthma               | Male   | 1 to 4         | 80 plus | Global     | 1         | Cumulative Cigarettes (5 Years)                     |
| Asthma               | Male   | 1 to 4         | 80 plus | Global     | 1         | Indoor Air Pollution (Biomass Cooking)              |
| Asthma               | Male   | 1 to 4         | 80 plus | Global     | 1         | Indoor Air Pollution (Coal Cooking)                 |
| Asthma               | Male   | 1 to 4         | 80 plus | Global     | 1         | Log-transformed SEV scalar: Asthma                  |
| Asthma               | Male   | 1 to 4         | 80 plus | Global     | 1         | Outdoor Air Pollution (PM2.5)                       |
| Asthma               | Male   | 1 to 4         | 80 plus | Global     | 1         | Smoking Prevalence                                  |
| Asthma               | Male   | 1 to 4         | 80 plus | Data Rich  | -1        | Education (years per capita)                        |
| Asthma               | Male   | 1 to 4         | 80 plus | Data Rich  | -1        | Health System Access 2 (unitless)                   |
| Asthma               | Male   | 1 to 4         | 80 plus | Data Rich  | -1        | LDI (IS per capita)                                 |
| Asthma               | Male   | 1 to 4         | 80 plus | Data Rich  | -1        | Sociodemographic Status                             |
| Asthma               | Male   | 1 to 4         | 80 plus | Data Rich  | 1         | Cumulative Cigarettes (10 Years)                    |
| Asthma               | Male   | 1 to 4         | 80 plus | Data Rich  | 1         | Cumulative Cigarettes (5 Years)                     |
| Asthma               | Male   | 1 to 4         | 80 plus | Data Rich  | 1         | Indoor Air Pollution (Biomass Cooking)              |
| Asthma               | Male   | 1 to 4         | 80 plus | Data Rich  | 1         | Indoor Air Pollution (Coal Cooking)                 |

**Appendix Table 10: CODEm covariates used, level of covariate, and expected direction of covariate by cause, sex, and age**

| Cause                                               | Sex    | Age start | Age end | Model type | Direction | Covariate                                           |
|-----------------------------------------------------|--------|-----------|---------|------------|-----------|-----------------------------------------------------|
| Asthma                                              | Male   | 1 to 4    | 80 plus | Data Rich  | 1         | Log-transformed SEV scalar: Asthma                  |
| Asthma                                              | Male   | 1 to 4    | 80 plus | Data Rich  | 1         | Outdoor Air Pollution (PM2.5)                       |
| Asthma                                              | Male   | 1 to 4    | 80 plus | Data Rich  | 1         | Smoking Prevalence                                  |
| Asthma                                              | Female | 1 to 4    | 80 plus | Global     | -1        | Education (years per capita)                        |
| Asthma                                              | Female | 1 to 4    | 80 plus | Global     | -1        | Health System Access 2 (unitless)                   |
| Asthma                                              | Female | 1 to 4    | 80 plus | Global     | -1        | LDI (IS per capita)                                 |
| Asthma                                              | Female | 1 to 4    | 80 plus | Global     | -1        | Sociodemographic Status                             |
| Asthma                                              | Female | 1 to 4    | 80 plus | Global     | 1         | Cumulative Cigarettes (10 Years)                    |
| Asthma                                              | Female | 1 to 4    | 80 plus | Global     | 1         | Cumulative Cigarettes (5 Years)                     |
| Asthma                                              | Female | 1 to 4    | 80 plus | Global     | 1         | Indoor Air Pollution (Biomass Cooking)              |
| Asthma                                              | Female | 1 to 4    | 80 plus | Global     | 1         | Indoor Air Pollution (Coal Cooking)                 |
| Asthma                                              | Female | 1 to 4    | 80 plus | Global     | 1         | Log-transformed SEV scalar: Asthma                  |
| Asthma                                              | Female | 1 to 4    | 80 plus | Global     | 1         | Outdoor Air Pollution (PM2.5)                       |
| Asthma                                              | Female | 1 to 4    | 80 plus | Global     | 1         | Smoking Prevalence                                  |
| Asthma                                              | Female | 1 to 4    | 80 plus | Data Rich  | -1        | Education (years per capita)                        |
| Asthma                                              | Female | 1 to 4    | 80 plus | Data Rich  | -1        | Health System Access 2 (unitless)                   |
| Asthma                                              | Female | 1 to 4    | 80 plus | Data Rich  | -1        | LDI (IS per capita)                                 |
| Asthma                                              | Female | 1 to 4    | 80 plus | Data Rich  | -1        | Sociodemographic Status                             |
| Asthma                                              | Female | 1 to 4    | 80 plus | Data Rich  | 1         | Cumulative Cigarettes (10 Years)                    |
| Asthma                                              | Female | 1 to 4    | 80 plus | Data Rich  | 1         | Cumulative Cigarettes (5 Years)                     |
| Asthma                                              | Female | 1 to 4    | 80 plus | Data Rich  | 1         | Indoor Air Pollution (Biomass Cooking)              |
| Asthma                                              | Female | 1 to 4    | 80 plus | Data Rich  | 1         | Indoor Air Pollution (Coal Cooking)                 |
| Asthma                                              | Female | 1 to 4    | 80 plus | Data Rich  | 1         | Log-transformed SEV scalar: Asthma                  |
| Asthma                                              | Female | 1 to 4    | 80 plus | Data Rich  | 1         | Outdoor Air Pollution (PM2.5)                       |
| Asthma                                              | Female | 1 to 4    | 80 plus | Data Rich  | 1         | Smoking Prevalence                                  |
| Interstitial lung disease and pulmonary sarcoidosis | Male   | 1 to 4    | 80 plus | Global     | -1        | Education (years per capita)                        |
| Interstitial lung disease and pulmonary sarcoidosis | Male   | 1 to 4    | 80 plus | Global     | -1        | Health System Access 2 (unitless)                   |
| Interstitial lung disease and pulmonary sarcoidosis | Male   | 1 to 4    | 80 plus | Global     | -1        | LDI (IS per capita)                                 |
| Interstitial lung disease and pulmonary sarcoidosis | Male   | 1 to 4    | 80 plus | Global     | 0         | Sociodemographic Status                             |
| Interstitial lung disease and pulmonary sarcoidosis | Male   | 1 to 4    | 80 plus | Global     | 1         | Cumulative Cigarettes (5 Years)                     |
| Interstitial lung disease and pulmonary sarcoidosis | Male   | 1 to 4    | 80 plus | Global     | 1         | Elevation 500 to 1500m (proportion)                 |
| Interstitial lung disease and pulmonary sarcoidosis | Male   | 1 to 4    | 80 plus | Global     | 1         | Elevation Over 1500m (proportion)                   |
| Interstitial lung disease and pulmonary sarcoidosis | Male   | 1 to 4    | 80 plus | Global     | 1         | Indoor Air Pollution (Biomass Cooking)              |
| Interstitial lung disease and pulmonary sarcoidosis | Male   | 1 to 4    | 80 plus | Global     | 1         | Indoor Air Pollution (Coal Cooking)                 |
| Interstitial lung disease and pulmonary sarcoidosis | Male   | 1 to 4    | 80 plus | Global     | 1         | Log-transformed SEV scalar: ILD                     |
| Interstitial lung disease and pulmonary sarcoidosis | Male   | 1 to 4    | 80 plus | Global     | 1         | Outdoor Air Pollution (PM2.5)                       |
| Interstitial lung disease and pulmonary sarcoidosis | Male   | 1 to 4    | 80 plus | Global     | 1         | Population Density (over 1000 ppl/sqkm, proportion) |
| Interstitial lung disease and pulmonary sarcoidosis | Male   | 1 to 4    | 80 plus | Global     | 1         | Smoking Prevalence                                  |
| Interstitial lung disease and pulmonary sarcoidosis | Male   | 1 to 4    | 80 plus | Data Rich  | -1        | Education (years per capita)                        |
| Interstitial lung disease and pulmonary sarcoidosis | Male   | 1 to 4    | 80 plus | Data Rich  | -1        | Health System Access 2 (unitless)                   |
| Interstitial lung disease and pulmonary sarcoidosis | Male   | 1 to 4    | 80 plus | Data Rich  | -1        | LDI (IS per capita)                                 |
| Interstitial lung disease and pulmonary sarcoidosis | Male   | 1 to 4    | 80 plus | Data Rich  | 0         | Sociodemographic Status                             |
| Interstitial lung disease and pulmonary sarcoidosis | Male   | 1 to 4    | 80 plus | Data Rich  | 1         | Cumulative Cigarettes (5 Years)                     |
| Interstitial lung disease and pulmonary sarcoidosis | Male   | 1 to 4    | 80 plus | Data Rich  | 1         | Elevation 500 to 1500m (proportion)                 |



**Appendix Table 10: CODEm covariates used, level of covariate, and expected direction of covariate by cause, sex, and age**

| Cause                                               | Sex    | Age start      | Age end | Model type | Direction | Covariate                                           |
|-----------------------------------------------------|--------|----------------|---------|------------|-----------|-----------------------------------------------------|
| Interstitial lung disease and pulmonary sarcoidosis | Male   | 1 to 4         | 80 plus | Data Rich  | 1         | Elevation Over 1500m (proportion)                   |
| Interstitial lung disease and pulmonary sarcoidosis | Male   | 1 to 4         | 80 plus | Data Rich  | 1         | Indoor Air Pollution (Biomass Cooking)              |
| Interstitial lung disease and pulmonary sarcoidosis | Male   | 1 to 4         | 80 plus | Data Rich  | 1         | Indoor Air Pollution (Coal Cooking)                 |
| Interstitial lung disease and pulmonary sarcoidosis | Male   | 1 to 4         | 80 plus | Data Rich  | 1         | Log-transformed SEV scalar: ILD                     |
| Interstitial lung disease and pulmonary sarcoidosis | Male   | 1 to 4         | 80 plus | Data Rich  | 1         | Outdoor Air Pollution (PM2.5)                       |
| Interstitial lung disease and pulmonary sarcoidosis | Male   | 1 to 4         | 80 plus | Data Rich  | 1         | Population Density (over 1000 ppl/sqkm, proportion) |
| Interstitial lung disease and pulmonary sarcoidosis | Male   | 1 to 4         | 80 plus | Data Rich  | 1         | Smoking Prevalence                                  |
| Interstitial lung disease and pulmonary sarcoidosis | Female | 1 to 4         | 80 plus | Global     | -1        | Education (years per capita)                        |
| Interstitial lung disease and pulmonary sarcoidosis | Female | 1 to 4         | 80 plus | Global     | -1        | Health System Access 2 (unitless)                   |
| Interstitial lung disease and pulmonary sarcoidosis | Female | 1 to 4         | 80 plus | Global     | -1        | LDI (I\$ per capita)                                |
| Interstitial lung disease and pulmonary sarcoidosis | Female | 1 to 4         | 80 plus | Global     | 0         | Sociodemographic Status                             |
| Interstitial lung disease and pulmonary sarcoidosis | Female | 1 to 4         | 80 plus | Global     | 1         | Cumulative Cigarettes (5 Years)                     |
| Interstitial lung disease and pulmonary sarcoidosis | Female | 1 to 4         | 80 plus | Global     | 1         | Elevation 500 to 1500m (proportion)                 |
| Interstitial lung disease and pulmonary sarcoidosis | Female | 1 to 4         | 80 plus | Global     | 1         | Elevation Over 1500m (proportion)                   |
| Interstitial lung disease and pulmonary sarcoidosis | Female | 1 to 4         | 80 plus | Global     | 1         | Indoor Air Pollution (Biomass Cooking)              |
| Interstitial lung disease and pulmonary sarcoidosis | Female | 1 to 4         | 80 plus | Global     | 1         | Indoor Air Pollution (Coal Cooking)                 |
| Interstitial lung disease and pulmonary sarcoidosis | Female | 1 to 4         | 80 plus | Global     | 1         | Log-transformed SEV scalar: ILD                     |
| Interstitial lung disease and pulmonary sarcoidosis | Female | 1 to 4         | 80 plus | Global     | 1         | Outdoor Air Pollution (PM2.5)                       |
| Interstitial lung disease and pulmonary sarcoidosis | Female | 1 to 4         | 80 plus | Global     | 1         | Population Density (over 1000 ppl/sqkm, proportion) |
| Interstitial lung disease and pulmonary sarcoidosis | Female | 1 to 4         | 80 plus | Global     | 1         | Smoking Prevalence                                  |
| Interstitial lung disease and pulmonary sarcoidosis | Female | 1 to 4         | 80 plus | Data Rich  | -1        | Education (years per capita)                        |
| Interstitial lung disease and pulmonary sarcoidosis | Female | 1 to 4         | 80 plus | Data Rich  | -1        | Health System Access 2 (unitless)                   |
| Interstitial lung disease and pulmonary sarcoidosis | Female | 1 to 4         | 80 plus | Data Rich  | -1        | LDI (I\$ per capita)                                |
| Interstitial lung disease and pulmonary sarcoidosis | Female | 1 to 4         | 80 plus | Data Rich  | 0         | Sociodemographic Status                             |
| Interstitial lung disease and pulmonary sarcoidosis | Female | 1 to 4         | 80 plus | Data Rich  | 1         | Cumulative Cigarettes (5 Years)                     |
| Interstitial lung disease and pulmonary sarcoidosis | Female | 1 to 4         | 80 plus | Data Rich  | 1         | Elevation 500 to 1500m (proportion)                 |
| Interstitial lung disease and pulmonary sarcoidosis | Female | 1 to 4         | 80 plus | Data Rich  | 1         | Elevation Over 1500m (proportion)                   |
| Interstitial lung disease and pulmonary sarcoidosis | Female | 1 to 4         | 80 plus | Data Rich  | 1         | Indoor Air Pollution (Biomass Cooking)              |
| Interstitial lung disease and pulmonary sarcoidosis | Female | 1 to 4         | 80 plus | Data Rich  | 1         | Indoor Air Pollution (Coal Cooking)                 |
| Interstitial lung disease and pulmonary sarcoidosis | Female | 1 to 4         | 80 plus | Data Rich  | 1         | Log-transformed SEV scalar: ILD                     |
| Interstitial lung disease and pulmonary sarcoidosis | Female | 1 to 4         | 80 plus | Data Rich  | 1         | Outdoor Air Pollution (PM2.5)                       |
| Interstitial lung disease and pulmonary sarcoidosis | Female | 1 to 4         | 80 plus | Data Rich  | 1         | Population Density (over 1000 ppl/sqkm, proportion) |
| Interstitial lung disease and pulmonary sarcoidosis | Female | 1 to 4         | 80 plus | Data Rich  | 1         | Smoking Prevalence                                  |
| Other chronic respiratory diseases                  | Male   | Early Neonatal | 80 plus | Global     | -1        | Education (years per capita)                        |
| Other chronic respiratory diseases                  | Male   | Early Neonatal | 80 plus | Global     | -1        | Health System Access 2 (unitless)                   |
| Other chronic respiratory diseases                  | Male   | Early Neonatal | 80 plus | Global     | -1        | LDI (I\$ per capita)                                |
| Other chronic respiratory diseases                  | Male   | Early Neonatal | 80 plus | Global     | -1        | Sociodemographic Status                             |
| Other chronic respiratory diseases                  | Male   | Early Neonatal | 80 plus | Global     | 1         | Cumulative Cigarettes (5 Years)                     |
| Other chronic respiratory diseases                  | Male   | Early Neonatal | 80 plus | Global     | 1         | Elevation 500 to 1500m (proportion)                 |
| Other chronic respiratory diseases                  | Male   | Early Neonatal | 80 plus | Global     | 1         | Elevation Over 1500m (proportion)                   |
| Other chronic respiratory diseases                  | Male   | Early Neonatal | 80 plus | Global     | 1         | Indoor Air Pollution (Biomass Cooking)              |
| Other chronic respiratory diseases                  | Male   | Early Neonatal | 80 plus | Global     | 1         | Indoor Air Pollution (Coal Cooking)                 |
| Other chronic respiratory diseases                  | Male   | Early Neonatal | 80 plus | Global     | 1         | Log-transformed SEV scalar: Oth Resp                |
| Other chronic respiratory diseases                  | Male   | Early Neonatal | 80 plus | Global     | 1         | Outdoor Air Pollution (PM2.5)                       |

**Appendix Table 10: CODEm covariates used, level of covariate, and expected direction of covariate by cause, sex, and age**

| Cause                                      | Sex    | Age start      | Age end | Model type | Direction | Covariate                                           |
|--------------------------------------------|--------|----------------|---------|------------|-----------|-----------------------------------------------------|
| Other chronic respiratory diseases         | Male   | Early Neonatal | 80 plus | Global     | 1         | Population Density (over 1000 ppl/sqkm, proportion) |
| Other chronic respiratory diseases         | Male   | Early Neonatal | 80 plus | Global     | 1         | Smoking Prevalence                                  |
| Other chronic respiratory diseases         | Male   | Early Neonatal | 80 plus | Data Rich  | -1        | Education (years per capita)                        |
| Other chronic respiratory diseases         | Male   | Early Neonatal | 80 plus | Data Rich  | -1        | Health System Access 2 (unitless)                   |
| Other chronic respiratory diseases         | Male   | Early Neonatal | 80 plus | Data Rich  | -1        | LDI (IS per capita)                                 |
| Other chronic respiratory diseases         | Male   | Early Neonatal | 80 plus | Data Rich  | -1        | Sociodemographic Status                             |
| Other chronic respiratory diseases         | Male   | Early Neonatal | 80 plus | Data Rich  | 1         | Cumulative Cigarettes (5 Years)                     |
| Other chronic respiratory diseases         | Male   | Early Neonatal | 80 plus | Data Rich  | 1         | Elevation 500 to 1500m (proportion)                 |
| Other chronic respiratory diseases         | Male   | Early Neonatal | 80 plus | Data Rich  | 1         | Elevation Over 1500m (proportion)                   |
| Other chronic respiratory diseases         | Male   | Early Neonatal | 80 plus | Data Rich  | 1         | Indoor Air Pollution (Biomass Cooking)              |
| Other chronic respiratory diseases         | Male   | Early Neonatal | 80 plus | Data Rich  | 1         | Indoor Air Pollution (Coal Cooking)                 |
| Other chronic respiratory diseases         | Male   | Early Neonatal | 80 plus | Data Rich  | 1         | Log-transformed SEV scalar: Oth Resp                |
| Other chronic respiratory diseases         | Male   | Early Neonatal | 80 plus | Data Rich  | 1         | Outdoor Air Pollution (PM2.5)                       |
| Other chronic respiratory diseases         | Male   | Early Neonatal | 80 plus | Data Rich  | 1         | Population Density (over 1000 ppl/sqkm, proportion) |
| Other chronic respiratory diseases         | Male   | Early Neonatal | 80 plus | Data Rich  | 1         | Smoking Prevalence                                  |
| Other chronic respiratory diseases         | Female | Early Neonatal | 80 plus | Global     | -1        | Education (years per capita)                        |
| Other chronic respiratory diseases         | Female | Early Neonatal | 80 plus | Global     | -1        | Health System Access 2 (unitless)                   |
| Other chronic respiratory diseases         | Female | Early Neonatal | 80 plus | Global     | -1        | LDI (IS per capita)                                 |
| Other chronic respiratory diseases         | Female | Early Neonatal | 80 plus | Global     | -1        | Sociodemographic Status                             |
| Other chronic respiratory diseases         | Female | Early Neonatal | 80 plus | Global     | 1         | Cumulative Cigarettes (5 Years)                     |
| Other chronic respiratory diseases         | Female | Early Neonatal | 80 plus | Global     | 1         | Elevation 500 to 1500m (proportion)                 |
| Other chronic respiratory diseases         | Female | Early Neonatal | 80 plus | Global     | 1         | Elevation Over 1500m (proportion)                   |
| Other chronic respiratory diseases         | Female | Early Neonatal | 80 plus | Global     | 1         | Indoor Air Pollution (Biomass Cooking)              |
| Other chronic respiratory diseases         | Female | Early Neonatal | 80 plus | Global     | 1         | Indoor Air Pollution (Coal Cooking)                 |
| Other chronic respiratory diseases         | Female | Early Neonatal | 80 plus | Global     | 1         | Log-transformed SEV scalar: Oth Resp                |
| Other chronic respiratory diseases         | Female | Early Neonatal | 80 plus | Global     | 1         | Outdoor Air Pollution (PM2.5)                       |
| Other chronic respiratory diseases         | Female | Early Neonatal | 80 plus | Global     | 1         | Population Density (over 1000 ppl/sqkm, proportion) |
| Other chronic respiratory diseases         | Female | Early Neonatal | 80 plus | Global     | 1         | Smoking Prevalence                                  |
| Other chronic respiratory diseases         | Female | Early Neonatal | 80 plus | Data Rich  | -1        | Education (years per capita)                        |
| Other chronic respiratory diseases         | Female | Early Neonatal | 80 plus | Data Rich  | -1        | Health System Access 2 (unitless)                   |
| Other chronic respiratory diseases         | Female | Early Neonatal | 80 plus | Data Rich  | -1        | LDI (IS per capita)                                 |
| Other chronic respiratory diseases         | Female | Early Neonatal | 80 plus | Data Rich  | -1        | Sociodemographic Status                             |
| Other chronic respiratory diseases         | Female | Early Neonatal | 80 plus | Data Rich  | 1         | Cumulative Cigarettes (5 Years)                     |
| Other chronic respiratory diseases         | Female | Early Neonatal | 80 plus | Data Rich  | 1         | Elevation 500 to 1500m (proportion)                 |
| Other chronic respiratory diseases         | Female | Early Neonatal | 80 plus | Data Rich  | 1         | Elevation Over 1500m (proportion)                   |
| Other chronic respiratory diseases         | Female | Early Neonatal | 80 plus | Data Rich  | 1         | Indoor Air Pollution (Biomass Cooking)              |
| Other chronic respiratory diseases         | Female | Early Neonatal | 80 plus | Data Rich  | 1         | Indoor Air Pollution (Coal Cooking)                 |
| Other chronic respiratory diseases         | Female | Early Neonatal | 80 plus | Data Rich  | 1         | Log-transformed SEV scalar: Oth Resp                |
| Other chronic respiratory diseases         | Female | Early Neonatal | 80 plus | Data Rich  | 1         | Outdoor Air Pollution (PM2.5)                       |
| Other chronic respiratory diseases         | Female | Early Neonatal | 80 plus | Data Rich  | 1         | Population Density (over 1000 ppl/sqkm, proportion) |
| Other chronic respiratory diseases         | Female | Early Neonatal | 80 plus | Data Rich  | 1         | Smoking Prevalence                                  |
| Cirrhosis and other chronic liver diseases | Male   | 1 to 4         | 80 plus | Global     | -1        | Education (years per capita)                        |
| Cirrhosis and other chronic liver diseases | Male   | 1 to 4         | 80 plus | Global     | -1        | Health System Access 2 (unitless)                   |
| Cirrhosis and other chronic liver diseases | Male   | 1 to 4         | 80 plus | Global     | -1        | LDI (IS per capita)                                 |

**Appendix Table 10: CODEm covariates used, level of covariate, and expected direction of covariate by cause, sex, and age**

| Cause                                      | Sex    | Age start | Age end | Model type | Direction | Covariate                                         |
|--------------------------------------------|--------|-----------|---------|------------|-----------|---------------------------------------------------|
| Cirrhosis and other chronic liver diseases | Male   | 1 to 4    | 80 plus | Global     | 0         | Sociodemographic Status                           |
| Cirrhosis and other chronic liver diseases | Male   | 1 to 4    | 80 plus | Global     | 1         | Alcohol (litres per capita)                       |
| Cirrhosis and other chronic liver diseases | Male   | 1 to 4    | 80 plus | Global     | 1         | Diabetes Age-Standardised Prevalence (proportion) |
| Cirrhosis and other chronic liver diseases | Male   | 1 to 4    | 80 plus | Global     | 1         | Hepatitis B (HBsAg) Seroprevalence (GBD 2015)     |
| Cirrhosis and other chronic liver diseases | Male   | 1 to 4    | 80 plus | Global     | 1         | Hepatitis C (IgG) Seroprevalence (GBD 2015)       |
| Cirrhosis and other chronic liver diseases | Male   | 1 to 4    | 80 plus | Global     | 1         | Mean BMI                                          |
| Cirrhosis and other chronic liver diseases | Male   | 1 to 4    | 80 plus | Global     | 1         | Schistosomiasis Prevalence (proportion)           |
| Cirrhosis and other chronic liver diseases | Male   | 1 to 4    | 80 plus | Data Rich  | -1        | Education (years per capita)                      |
| Cirrhosis and other chronic liver diseases | Male   | 1 to 4    | 80 plus | Data Rich  | -1        | Health System Access 2 (unitless)                 |
| Cirrhosis and other chronic liver diseases | Male   | 1 to 4    | 80 plus | Data Rich  | -1        | LDI (IS per capita)                               |
| Cirrhosis and other chronic liver diseases | Male   | 1 to 4    | 80 plus | Data Rich  | 0         | Sociodemographic Status                           |
| Cirrhosis and other chronic liver diseases | Male   | 1 to 4    | 80 plus | Data Rich  | 1         | Alcohol (litres per capita)                       |
| Cirrhosis and other chronic liver diseases | Male   | 1 to 4    | 80 plus | Data Rich  | 1         | Diabetes Age-Standardised Prevalence (proportion) |
| Cirrhosis and other chronic liver diseases | Male   | 1 to 4    | 80 plus | Data Rich  | 1         | Hepatitis B (HBsAg) Seroprevalence (GBD 2015)     |
| Cirrhosis and other chronic liver diseases | Male   | 1 to 4    | 80 plus | Data Rich  | 1         | Hepatitis C (IgG) Seroprevalence (GBD 2015)       |
| Cirrhosis and other chronic liver diseases | Male   | 1 to 4    | 80 plus | Data Rich  | 1         | Mean BMI                                          |
| Cirrhosis and other chronic liver diseases | Male   | 1 to 4    | 80 plus | Data Rich  | 1         | Schistosomiasis Prevalence (proportion)           |
| Cirrhosis and other chronic liver diseases | Female | 1 to 4    | 80 plus | Global     | -1        | Education (years per capita)                      |
| Cirrhosis and other chronic liver diseases | Female | 1 to 4    | 80 plus | Global     | -1        | Health System Access 2 (unitless)                 |
| Cirrhosis and other chronic liver diseases | Female | 1 to 4    | 80 plus | Global     | -1        | LDI (IS per capita)                               |
| Cirrhosis and other chronic liver diseases | Female | 1 to 4    | 80 plus | Global     | 0         | Sociodemographic Status                           |
| Cirrhosis and other chronic liver diseases | Female | 1 to 4    | 80 plus | Global     | 1         | Alcohol (litres per capita)                       |
| Cirrhosis and other chronic liver diseases | Female | 1 to 4    | 80 plus | Global     | 1         | Diabetes Age-Standardised Prevalence (proportion) |
| Cirrhosis and other chronic liver diseases | Female | 1 to 4    | 80 plus | Global     | 1         | Hepatitis B (HBsAg) Seroprevalence (GBD 2015)     |
| Cirrhosis and other chronic liver diseases | Female | 1 to 4    | 80 plus | Global     | 1         | Hepatitis C (IgG) Seroprevalence (GBD 2015)       |
| Cirrhosis and other chronic liver diseases | Female | 1 to 4    | 80 plus | Global     | 1         | Mean BMI                                          |
| Cirrhosis and other chronic liver diseases | Female | 1 to 4    | 80 plus | Global     | 1         | Schistosomiasis Prevalence (proportion)           |
| Cirrhosis and other chronic liver diseases | Female | 1 to 4    | 80 plus | Data Rich  | -1        | Education (years per capita)                      |
| Cirrhosis and other chronic liver diseases | Female | 1 to 4    | 80 plus | Data Rich  | -1        | Health System Access 2 (unitless)                 |
| Cirrhosis and other chronic liver diseases | Female | 1 to 4    | 80 plus | Data Rich  | -1        | LDI (IS per capita)                               |
| Cirrhosis and other chronic liver diseases | Female | 1 to 4    | 80 plus | Data Rich  | 0         | Sociodemographic Status                           |
| Cirrhosis and other chronic liver diseases | Female | 1 to 4    | 80 plus | Data Rich  | 1         | Alcohol (litres per capita)                       |
| Cirrhosis and other chronic liver diseases | Female | 1 to 4    | 80 plus | Data Rich  | 1         | Diabetes Age-Standardised Prevalence (proportion) |
| Cirrhosis and other chronic liver diseases | Female | 1 to 4    | 80 plus | Data Rich  | 1         | Hepatitis B (HBsAg) Seroprevalence (GBD 2015)     |
| Cirrhosis and other chronic liver diseases | Female | 1 to 4    | 80 plus | Data Rich  | 1         | Hepatitis C (IgG) Seroprevalence (GBD 2015)       |
| Cirrhosis and other chronic liver diseases | Female | 1 to 4    | 80 plus | Data Rich  | 1         | Mean BMI                                          |
| Cirrhosis and other chronic liver diseases | Female | 1 to 4    | 80 plus | Data Rich  | 1         | Schistosomiasis Prevalence (proportion)           |
| Digestive diseases                         | Male   | 1 to 4    | 80 plus | Global     | -1        | Education (years per capita)                      |
| Digestive diseases                         | Male   | 1 to 4    | 80 plus | Global     | -1        | Health System Access (capped)                     |
| Digestive diseases                         | Male   | 1 to 4    | 80 plus | Global     | -1        | LDI (IS per capita)                               |
| Digestive diseases                         | Male   | 1 to 4    | 80 plus | Global     | -1        | Sanitation (proportion with access)               |
| Digestive diseases                         | Male   | 1 to 4    | 80 plus | Global     | -1        | Sociodemographic Status                           |
| Digestive diseases                         | Male   | 1 to 4    | 80 plus | Global     | -1        | fruits adjusted(g)                                |
| Digestive diseases                         | Male   | 1 to 4    | 80 plus | Global     | 1         | Alcohol (litres per capita)                       |

**Appendix Table 10: CODEm covariates used, level of covariate, and expected direction of covariate by cause, sex, and age**

| Cause                | Sex    | Age start | Age end | Model type | Direction | Covariate                                     |
|----------------------|--------|-----------|---------|------------|-----------|-----------------------------------------------|
| Digestive diseases   | Male   | 1 to 4    | 80 plus | Global     | 1         | Cumulative Cigarettes (5 Years)               |
| Digestive diseases   | Male   | 1 to 4    | 80 plus | Global     | 1         | Malnutrition (proportion <2SD weight for age) |
| Digestive diseases   | Male   | 1 to 4    | 80 plus | Global     | 1         | red meats adjusted(g)                         |
| Digestive diseases   | Male   | 1 to 4    | 80 plus | Data Rich  | -1        | Education (years per capita)                  |
| Digestive diseases   | Male   | 1 to 4    | 80 plus | Data Rich  | -1        | Health System Access (capped)                 |
| Digestive diseases   | Male   | 1 to 4    | 80 plus | Data Rich  | -1        | LDI (IS per capita)                           |
| Digestive diseases   | Male   | 1 to 4    | 80 plus | Data Rich  | -1        | Sanitation (proportion with access)           |
| Digestive diseases   | Male   | 1 to 4    | 80 plus | Data Rich  | -1        | Sociodemographic Status                       |
| Digestive diseases   | Male   | 1 to 4    | 80 plus | Data Rich  | -1        | fruits adjusted(g)                            |
| Digestive diseases   | Male   | 1 to 4    | 80 plus | Data Rich  | 1         | Alcohol (litres per capita)                   |
| Digestive diseases   | Male   | 1 to 4    | 80 plus | Data Rich  | 1         | Cumulative Cigarettes (5 Years)               |
| Digestive diseases   | Male   | 1 to 4    | 80 plus | Data Rich  | 1         | Malnutrition (proportion <2SD weight for age) |
| Digestive diseases   | Male   | 1 to 4    | 80 plus | Data Rich  | 1         | red meats adjusted(g)                         |
| Digestive diseases   | Female | 1 to 4    | 80 plus | Global     | -1        | Education (years per capita)                  |
| Digestive diseases   | Female | 1 to 4    | 80 plus | Global     | -1        | Health System Access (capped)                 |
| Digestive diseases   | Female | 1 to 4    | 80 plus | Global     | -1        | LDI (IS per capita)                           |
| Digestive diseases   | Female | 1 to 4    | 80 plus | Global     | -1        | Sanitation (proportion with access)           |
| Digestive diseases   | Female | 1 to 4    | 80 plus | Global     | -1        | Sociodemographic Status                       |
| Digestive diseases   | Female | 1 to 4    | 80 plus | Global     | -1        | fruits adjusted(g)                            |
| Digestive diseases   | Female | 1 to 4    | 80 plus | Global     | 1         | Alcohol (litres per capita)                   |
| Digestive diseases   | Female | 1 to 4    | 80 plus | Global     | 1         | Cumulative Cigarettes (5 Years)               |
| Digestive diseases   | Female | 1 to 4    | 80 plus | Global     | 1         | Malnutrition (proportion <2SD weight for age) |
| Digestive diseases   | Female | 1 to 4    | 80 plus | Global     | 1         | red meats adjusted(g)                         |
| Digestive diseases   | Female | 1 to 4    | 80 plus | Data Rich  | -1        | Education (years per capita)                  |
| Digestive diseases   | Female | 1 to 4    | 80 plus | Data Rich  | -1        | Health System Access (capped)                 |
| Digestive diseases   | Female | 1 to 4    | 80 plus | Data Rich  | -1        | LDI (IS per capita)                           |
| Digestive diseases   | Female | 1 to 4    | 80 plus | Data Rich  | -1        | Sanitation (proportion with access)           |
| Digestive diseases   | Female | 1 to 4    | 80 plus | Data Rich  | -1        | Sociodemographic Status                       |
| Digestive diseases   | Female | 1 to 4    | 80 plus | Data Rich  | -1        | fruits adjusted(g)                            |
| Digestive diseases   | Female | 1 to 4    | 80 plus | Data Rich  | 1         | Alcohol (litres per capita)                   |
| Digestive diseases   | Female | 1 to 4    | 80 plus | Data Rich  | 1         | Cumulative Cigarettes (5 Years)               |
| Digestive diseases   | Female | 1 to 4    | 80 plus | Data Rich  | 1         | Malnutrition (proportion <2SD weight for age) |
| Digestive diseases   | Female | 1 to 4    | 80 plus | Data Rich  | 1         | red meats adjusted(g)                         |
| Peptic ulcer disease | Male   | 1 to 4    | 80 plus | Global     | -1        | Health System Access (capped)                 |
| Peptic ulcer disease | Male   | 1 to 4    | 80 plus | Global     | -1        | LDI (IS per capita)                           |
| Peptic ulcer disease | Male   | 1 to 4    | 80 plus | Global     | -1        | Maternal education (years per capita)         |
| Peptic ulcer disease | Male   | 1 to 4    | 80 plus | Global     | -1        | Sanitation (proportion with access)           |
| Peptic ulcer disease | Male   | 1 to 4    | 80 plus | Global     | -1        | Sociodemographic Status                       |
| Peptic ulcer disease | Male   | 1 to 4    | 80 plus | Global     | -1        | vegetables adjusted(g)                        |
| Peptic ulcer disease | Male   | 1 to 4    | 80 plus | Global     | 1         | Alcohol (litres per capita)                   |
| Peptic ulcer disease | Male   | 1 to 4    | 80 plus | Global     | 1         | Cumulative Cigarettes (10 Years)              |
| Peptic ulcer disease | Male   | 1 to 4    | 80 plus | Global     | 1         | Cumulative Cigarettes (5 Years)               |
| Peptic ulcer disease | Male   | 1 to 4    | 80 plus | Global     | 1         | Smoking Prevalence                            |
| Peptic ulcer disease | Male   | 1 to 4    | 80 plus | Data Rich  | -1        | Health System Access (capped)                 |

**Appendix Table 10: CODEm covariates used, level of covariate, and expected direction of covariate by cause, sex, and age**

| Cause                    | Sex    | Age start | Age end | Model type | Direction | Covariate                                      |
|--------------------------|--------|-----------|---------|------------|-----------|------------------------------------------------|
| Peptic ulcer disease     | Male   | 1 to 4    | 80 plus | Data Rich  | -1        | LDI (IS per capita)                            |
| Peptic ulcer disease     | Male   | 1 to 4    | 80 plus | Data Rich  | -1        | Maternal education (years per capita)          |
| Peptic ulcer disease     | Male   | 1 to 4    | 80 plus | Data Rich  | -1        | Sanitation (proportion with access)            |
| Peptic ulcer disease     | Male   | 1 to 4    | 80 plus | Data Rich  | -1        | Sociodemographic Status                        |
| Peptic ulcer disease     | Male   | 1 to 4    | 80 plus | Data Rich  | -1        | vegetables adjusted(g)                         |
| Peptic ulcer disease     | Male   | 1 to 4    | 80 plus | Data Rich  | 1         | Alcohol (litres per capita)                    |
| Peptic ulcer disease     | Male   | 1 to 4    | 80 plus | Data Rich  | 1         | Cumulative Cigarettes (10 Years)               |
| Peptic ulcer disease     | Male   | 1 to 4    | 80 plus | Data Rich  | 1         | Cumulative Cigarettes (5 Years)                |
| Peptic ulcer disease     | Male   | 1 to 4    | 80 plus | Data Rich  | 1         | Smoking Prevalence                             |
| Peptic ulcer disease     | Female | 1 to 4    | 80 plus | Global     | -1        | Health System Access (capped)                  |
| Peptic ulcer disease     | Female | 1 to 4    | 80 plus | Global     | -1        | LDI (IS per capita)                            |
| Peptic ulcer disease     | Female | 1 to 4    | 80 plus | Global     | -1        | Maternal education (years per capita)          |
| Peptic ulcer disease     | Female | 1 to 4    | 80 plus | Global     | -1        | Sanitation (proportion with access)            |
| Peptic ulcer disease     | Female | 1 to 4    | 80 plus | Global     | -1        | Sociodemographic Status                        |
| Peptic ulcer disease     | Female | 1 to 4    | 80 plus | Global     | -1        | vegetables adjusted(g)                         |
| Peptic ulcer disease     | Female | 1 to 4    | 80 plus | Global     | 1         | Alcohol (litres per capita)                    |
| Peptic ulcer disease     | Female | 1 to 4    | 80 plus | Global     | 1         | Cumulative Cigarettes (10 Years)               |
| Peptic ulcer disease     | Female | 1 to 4    | 80 plus | Global     | 1         | Cumulative Cigarettes (5 Years)                |
| Peptic ulcer disease     | Female | 1 to 4    | 80 plus | Global     | 1         | Smoking Prevalence                             |
| Peptic ulcer disease     | Female | 1 to 4    | 80 plus | Data Rich  | -1        | Health System Access (capped)                  |
| Peptic ulcer disease     | Female | 1 to 4    | 80 plus | Data Rich  | -1        | LDI (IS per capita)                            |
| Peptic ulcer disease     | Female | 1 to 4    | 80 plus | Data Rich  | -1        | Maternal education (years per capita)          |
| Peptic ulcer disease     | Female | 1 to 4    | 80 plus | Data Rich  | -1        | Sanitation (proportion with access)            |
| Peptic ulcer disease     | Female | 1 to 4    | 80 plus | Data Rich  | -1        | Sociodemographic Status                        |
| Peptic ulcer disease     | Female | 1 to 4    | 80 plus | Data Rich  | -1        | vegetables adjusted(g)                         |
| Peptic ulcer disease     | Female | 1 to 4    | 80 plus | Data Rich  | 1         | Alcohol (litres per capita)                    |
| Peptic ulcer disease     | Female | 1 to 4    | 80 plus | Data Rich  | 1         | Cumulative Cigarettes (10 Years)               |
| Peptic ulcer disease     | Female | 1 to 4    | 80 plus | Data Rich  | 1         | Cumulative Cigarettes (5 Years)                |
| Peptic ulcer disease     | Female | 1 to 4    | 80 plus | Data Rich  | 1         | Smoking Prevalence                             |
| Gastritis and duodenitis | Male   | 1 to 4    | 80 plus | Global     | -1        | Education (years per capita)                   |
| Gastritis and duodenitis | Male   | 1 to 4    | 80 plus | Global     | -1        | Health System Access (capped)                  |
| Gastritis and duodenitis | Male   | 1 to 4    | 80 plus | Global     | -1        | Improved Water Source (proportion with access) |
| Gastritis and duodenitis | Male   | 1 to 4    | 80 plus | Global     | -1        | LDI (IS per capita)                            |
| Gastritis and duodenitis | Male   | 1 to 4    | 80 plus | Global     | -1        | Sanitation (proportion with access)            |
| Gastritis and duodenitis | Male   | 1 to 4    | 80 plus | Global     | -1        | Sociodemographic Status                        |
| Gastritis and duodenitis | Male   | 1 to 4    | 80 plus | Global     | 0         | vegetables adjusted(g)                         |
| Gastritis and duodenitis | Male   | 1 to 4    | 80 plus | Global     | 1         | Alcohol (litres per capita)                    |
| Gastritis and duodenitis | Male   | 1 to 4    | 80 plus | Global     | 1         | Cumulative Cigarettes (10 Years)               |
| Gastritis and duodenitis | Male   | 1 to 4    | 80 plus | Global     | 1         | Cumulative Cigarettes (5 Years)                |
| Gastritis and duodenitis | Male   | 1 to 4    | 80 plus | Global     | 1         | Smoking Prevalence                             |
| Gastritis and duodenitis | Male   | 1 to 4    | 80 plus | Data Rich  | -1        | Education (years per capita)                   |
| Gastritis and duodenitis | Male   | 1 to 4    | 80 plus | Data Rich  | -1        | Health System Access (capped)                  |
| Gastritis and duodenitis | Male   | 1 to 4    | 80 plus | Data Rich  | -1        | Improved Water Source (proportion with access) |
| Gastritis and duodenitis | Male   | 1 to 4    | 80 plus | Data Rich  | -1        | LDI (IS per capita)                            |

**Appendix Table 10: CODEm covariates used, level of covariate, and expected direction of covariate by cause, sex, and age**

| Cause                    | Sex    | Age start | Age end | Model type | Direction | Covariate                                      |
|--------------------------|--------|-----------|---------|------------|-----------|------------------------------------------------|
| Gastritis and duodenitis | Male   | 1 to 4    | 80 plus | Data Rich  | -1        | Sanitation (proportion with access)            |
| Gastritis and duodenitis | Male   | 1 to 4    | 80 plus | Data Rich  | -1        | Sociodemographic Status                        |
| Gastritis and duodenitis | Male   | 1 to 4    | 80 plus | Data Rich  | 0         | vegetables adjusted(g)                         |
| Gastritis and duodenitis | Male   | 1 to 4    | 80 plus | Data Rich  | 1         | Alcohol (litres per capita)                    |
| Gastritis and duodenitis | Male   | 1 to 4    | 80 plus | Data Rich  | 1         | Cumulative Cigarettes (10 Years)               |
| Gastritis and duodenitis | Male   | 1 to 4    | 80 plus | Data Rich  | 1         | Cumulative Cigarettes (5 Years)                |
| Gastritis and duodenitis | Male   | 1 to 4    | 80 plus | Data Rich  | 1         | Smoking Prevalence                             |
| Gastritis and duodenitis | Female | 1 to 4    | 80 plus | Global     | -1        | Education (years per capita)                   |
| Gastritis and duodenitis | Female | 1 to 4    | 80 plus | Global     | -1        | Health System Access (capped)                  |
| Gastritis and duodenitis | Female | 1 to 4    | 80 plus | Global     | -1        | Improved Water Source (proportion with access) |
| Gastritis and duodenitis | Female | 1 to 4    | 80 plus | Global     | -1        | LDI (IS per capita)                            |
| Gastritis and duodenitis | Female | 1 to 4    | 80 plus | Global     | -1        | Sanitation (proportion with access)            |
| Gastritis and duodenitis | Female | 1 to 4    | 80 plus | Global     | -1        | Sociodemographic Status                        |
| Gastritis and duodenitis | Female | 1 to 4    | 80 plus | Global     | 0         | vegetables adjusted(g)                         |
| Gastritis and duodenitis | Female | 1 to 4    | 80 plus | Global     | 1         | Alcohol (litres per capita)                    |
| Gastritis and duodenitis | Female | 1 to 4    | 80 plus | Global     | 1         | Cumulative Cigarettes (10 Years)               |
| Gastritis and duodenitis | Female | 1 to 4    | 80 plus | Global     | 1         | Cumulative Cigarettes (5 Years)                |
| Gastritis and duodenitis | Female | 1 to 4    | 80 plus | Global     | 1         | Smoking Prevalence                             |
| Gastritis and duodenitis | Female | 1 to 4    | 80 plus | Data Rich  | -1        | Education (years per capita)                   |
| Gastritis and duodenitis | Female | 1 to 4    | 80 plus | Data Rich  | -1        | Health System Access (capped)                  |
| Gastritis and duodenitis | Female | 1 to 4    | 80 plus | Data Rich  | -1        | Improved Water Source (proportion with access) |
| Gastritis and duodenitis | Female | 1 to 4    | 80 plus | Data Rich  | -1        | LDI (IS per capita)                            |
| Gastritis and duodenitis | Female | 1 to 4    | 80 plus | Data Rich  | -1        | Sanitation (proportion with access)            |
| Gastritis and duodenitis | Female | 1 to 4    | 80 plus | Data Rich  | -1        | Sociodemographic Status                        |
| Gastritis and duodenitis | Female | 1 to 4    | 80 plus | Data Rich  | 0         | vegetables adjusted(g)                         |
| Gastritis and duodenitis | Female | 1 to 4    | 80 plus | Data Rich  | 1         | Alcohol (litres per capita)                    |
| Gastritis and duodenitis | Female | 1 to 4    | 80 plus | Data Rich  | 1         | Cumulative Cigarettes (10 Years)               |
| Gastritis and duodenitis | Female | 1 to 4    | 80 plus | Data Rich  | 1         | Cumulative Cigarettes (5 Years)                |
| Gastritis and duodenitis | Female | 1 to 4    | 80 plus | Data Rich  | 1         | Smoking Prevalence                             |
| Appendicitis             | Male   | 1 to 4    | 80 plus | Global     | -1        | Education (years per capita)                   |
| Appendicitis             | Male   | 1 to 4    | 80 plus | Global     | -1        | Health System Access (capped)                  |
| Appendicitis             | Male   | 1 to 4    | 80 plus | Global     | -1        | LDI (IS per capita)                            |
| Appendicitis             | Male   | 1 to 4    | 80 plus | Global     | -1        | Sociodemographic Status                        |
| Appendicitis             | Male   | 1 to 4    | 80 plus | Global     | -1        | fruits adjusted(g)                             |
| Appendicitis             | Male   | 1 to 4    | 80 plus | Global     | -1        | vegetables adjusted(g)                         |
| Appendicitis             | Male   | 1 to 4    | 80 plus | Data Rich  | -1        | Education (years per capita)                   |
| Appendicitis             | Male   | 1 to 4    | 80 plus | Data Rich  | -1        | Health System Access (capped)                  |
| Appendicitis             | Male   | 1 to 4    | 80 plus | Data Rich  | -1        | LDI (IS per capita)                            |
| Appendicitis             | Male   | 1 to 4    | 80 plus | Data Rich  | -1        | Sociodemographic Status                        |
| Appendicitis             | Male   | 1 to 4    | 80 plus | Data Rich  | -1        | fruits adjusted(g)                             |
| Appendicitis             | Male   | 1 to 4    | 80 plus | Data Rich  | -1        | vegetables adjusted(g)                         |
| Appendicitis             | Female | 1 to 4    | 80 plus | Global     | -1        | Education (years per capita)                   |
| Appendicitis             | Female | 1 to 4    | 80 plus | Global     | -1        | Health System Access (capped)                  |
| Appendicitis             | Female | 1 to 4    | 80 plus | Global     | -1        | LDI (IS per capita)                            |

**Appendix Table 10: CODEm covariates used, level of covariate, and expected direction of covariate by cause, sex, and age**

| Cause                                      | Sex    | Age start      | Age end | Model type | Direction | Covariate                     |
|--------------------------------------------|--------|----------------|---------|------------|-----------|-------------------------------|
| Appendicitis                               | Female | 1 to 4         | 80 plus | Global     | -1        | Sociodemographic Status       |
| Appendicitis                               | Female | 1 to 4         | 80 plus | Global     | -1        | fruits adjusted(g)            |
| Appendicitis                               | Female | 1 to 4         | 80 plus | Global     | -1        | vegetables adjusted(g)        |
| Appendicitis                               | Female | 1 to 4         | 80 plus | Data Rich  | -1        | Education (years per capita)  |
| Appendicitis                               | Female | 1 to 4         | 80 plus | Data Rich  | -1        | Health System Access (capped) |
| Appendicitis                               | Female | 1 to 4         | 80 plus | Data Rich  | -1        | LDI (IS per capita)           |
| Appendicitis                               | Female | 1 to 4         | 80 plus | Data Rich  | -1        | Sociodemographic Status       |
| Appendicitis                               | Female | 1 to 4         | 80 plus | Data Rich  | -1        | fruits adjusted(g)            |
| Appendicitis                               | Female | 1 to 4         | 80 plus | Data Rich  | -1        | vegetables adjusted(g)        |
| Paralytic ileus and intestinal obstruction | Male   | Early Neonatal | 80 plus | Global     | -1        | Education (years per capita)  |
| Paralytic ileus and intestinal obstruction | Male   | Early Neonatal | 80 plus | Global     | -1        | Health System Access (capped) |
| Paralytic ileus and intestinal obstruction | Male   | Early Neonatal | 80 plus | Global     | -1        | LDI (IS per capita)           |
| Paralytic ileus and intestinal obstruction | Male   | Early Neonatal | 80 plus | Global     | -1        | Sociodemographic Status       |
| Paralytic ileus and intestinal obstruction | Male   | Early Neonatal | 80 plus | Global     | -1        | fruits adjusted(g)            |
| Paralytic ileus and intestinal obstruction | Male   | Early Neonatal | 80 plus | Global     | -1        | vegetables adjusted(g)        |
| Paralytic ileus and intestinal obstruction | Male   | Early Neonatal | 80 plus | Data Rich  | -1        | Education (years per capita)  |
| Paralytic ileus and intestinal obstruction | Male   | Early Neonatal | 80 plus | Data Rich  | -1        | Health System Access (capped) |
| Paralytic ileus and intestinal obstruction | Male   | Early Neonatal | 80 plus | Data Rich  | -1        | LDI (IS per capita)           |
| Paralytic ileus and intestinal obstruction | Male   | Early Neonatal | 80 plus | Data Rich  | -1        | Sociodemographic Status       |
| Paralytic ileus and intestinal obstruction | Male   | Early Neonatal | 80 plus | Data Rich  | -1        | fruits adjusted(g)            |
| Paralytic ileus and intestinal obstruction | Male   | Early Neonatal | 80 plus | Data Rich  | -1        | vegetables adjusted(g)        |
| Paralytic ileus and intestinal obstruction | Female | Early Neonatal | 80 plus | Global     | -1        | Education (years per capita)  |
| Paralytic ileus and intestinal obstruction | Female | Early Neonatal | 80 plus | Global     | -1        | Health System Access (capped) |
| Paralytic ileus and intestinal obstruction | Female | Early Neonatal | 80 plus | Global     | -1        | LDI (IS per capita)           |
| Paralytic ileus and intestinal obstruction | Female | Early Neonatal | 80 plus | Global     | -1        | Sociodemographic Status       |
| Paralytic ileus and intestinal obstruction | Female | Early Neonatal | 80 plus | Global     | -1        | fruits adjusted(g)            |
| Paralytic ileus and intestinal obstruction | Female | Early Neonatal | 80 plus | Global     | -1        | vegetables adjusted(g)        |
| Paralytic ileus and intestinal obstruction | Female | Early Neonatal | 80 plus | Data Rich  | -1        | Education (years per capita)  |
| Paralytic ileus and intestinal obstruction | Female | Early Neonatal | 80 plus | Data Rich  | -1        | Health System Access (capped) |
| Paralytic ileus and intestinal obstruction | Female | Early Neonatal | 80 plus | Data Rich  | -1        | LDI (IS per capita)           |
| Paralytic ileus and intestinal obstruction | Female | Early Neonatal | 80 plus | Data Rich  | -1        | Sociodemographic Status       |
| Paralytic ileus and intestinal obstruction | Female | Early Neonatal | 80 plus | Data Rich  | -1        | fruits adjusted(g)            |
| Paralytic ileus and intestinal obstruction | Female | Early Neonatal | 80 plus | Data Rich  | -1        | vegetables adjusted(g)        |
| Inguinal, femoral, and abdominal hernia    | Male   | 1 to 4         | 80 plus | Global     | -1        | Education (years per capita)  |
| Inguinal, femoral, and abdominal hernia    | Male   | 1 to 4         | 80 plus | Global     | -1        | Health System Access (capped) |
| Inguinal, femoral, and abdominal hernia    | Male   | 1 to 4         | 80 plus | Global     | -1        | LDI (IS per capita)           |
| Inguinal, femoral, and abdominal hernia    | Male   | 1 to 4         | 80 plus | Global     | 0         | Sociodemographic Status       |
| Inguinal, femoral, and abdominal hernia    | Male   | 1 to 4         | 80 plus | Data Rich  | -1        | Education (years per capita)  |
| Inguinal, femoral, and abdominal hernia    | Male   | 1 to 4         | 80 plus | Data Rich  | -1        | Health System Access (capped) |
| Inguinal, femoral, and abdominal hernia    | Male   | 1 to 4         | 80 plus | Data Rich  | -1        | LDI (IS per capita)           |
| Inguinal, femoral, and abdominal hernia    | Male   | 1 to 4         | 80 plus | Data Rich  | 0         | Sociodemographic Status       |
| Inguinal, femoral, and abdominal hernia    | Female | 1 to 4         | 80 plus | Global     | -1        | Education (years per capita)  |
| Inguinal, femoral, and abdominal hernia    | Female | 1 to 4         | 80 plus | Global     | -1        | Health System Access (capped) |
| Inguinal, femoral, and abdominal hernia    | Female | 1 to 4         | 80 plus | Global     | -1        | LDI (IS per capita)           |

**Appendix Table 10: CODEm covariates used, level of covariate, and expected direction of covariate by cause, sex, and age**

| Cause                                   | Sex    | Age start | Age end | Model type | Direction | Covariate                      |
|-----------------------------------------|--------|-----------|---------|------------|-----------|--------------------------------|
| Inguinal, femoral, and abdominal hernia | Female | 1 to 4    | 80 plus | Global     | 0         | Sociodemographic Status        |
| Inguinal, femoral, and abdominal hernia | Female | 1 to 4    | 80 plus | Data Rich  | -1        | Education (years per capita)   |
| Inguinal, femoral, and abdominal hernia | Female | 1 to 4    | 80 plus | Data Rich  | -1        | Health System Access (capped)  |
| Inguinal, femoral, and abdominal hernia | Female | 1 to 4    | 80 plus | Data Rich  | -1        | LDI (IS per capita)            |
| Inguinal, femoral, and abdominal hernia | Female | 1 to 4    | 80 plus | Data Rich  | 0         | Sociodemographic Status        |
| Inflammatory bowel disease              | Male   | 1 to 4    | 80 plus | Global     | -1        | Education (years per capita)   |
| Inflammatory bowel disease              | Male   | 1 to 4    | 80 plus | Global     | -1        | Health System Access (capped)  |
| Inflammatory bowel disease              | Male   | 1 to 4    | 80 plus | Global     | -1        | Latitude 15 to 30 (proportion) |
| Inflammatory bowel disease              | Male   | 1 to 4    | 80 plus | Global     | -1        | fruits adjusted(g)             |
| Inflammatory bowel disease              | Male   | 1 to 4    | 80 plus | Global     | -1        | vegetables adjusted(g)         |
| Inflammatory bowel disease              | Male   | 1 to 4    | 80 plus | Global     | 0         | LDI (IS per capita)            |
| Inflammatory bowel disease              | Male   | 1 to 4    | 80 plus | Global     | 0         | Sociodemographic Status        |
| Inflammatory bowel disease              | Male   | 1 to 4    | 80 plus | Global     | 1         | Animal Fats (kcal per capita)  |
| Inflammatory bowel disease              | Male   | 1 to 4    | 80 plus | Global     | 1         | Latitude 30 to 45 (proportion) |
| Inflammatory bowel disease              | Male   | 1 to 4    | 80 plus | Global     | 1         | Latitude Over 45 (proportion)  |
| Inflammatory bowel disease              | Male   | 1 to 4    | 80 plus | Global     | 1         | red meats adjusted(g)          |
| Inflammatory bowel disease              | Male   | 1 to 4    | 80 plus | Data Rich  | -1        | Education (years per capita)   |
| Inflammatory bowel disease              | Male   | 1 to 4    | 80 plus | Data Rich  | -1        | Health System Access (capped)  |
| Inflammatory bowel disease              | Male   | 1 to 4    | 80 plus | Data Rich  | -1        | Latitude 15 to 30 (proportion) |
| Inflammatory bowel disease              | Male   | 1 to 4    | 80 plus | Data Rich  | -1        | fruits adjusted(g)             |
| Inflammatory bowel disease              | Male   | 1 to 4    | 80 plus | Data Rich  | -1        | vegetables adjusted(g)         |
| Inflammatory bowel disease              | Male   | 1 to 4    | 80 plus | Data Rich  | 0         | LDI (IS per capita)            |
| Inflammatory bowel disease              | Male   | 1 to 4    | 80 plus | Data Rich  | 0         | Sociodemographic Status        |
| Inflammatory bowel disease              | Male   | 1 to 4    | 80 plus | Data Rich  | 1         | Animal Fats (kcal per capita)  |
| Inflammatory bowel disease              | Male   | 1 to 4    | 80 plus | Data Rich  | 1         | Latitude 30 to 45 (proportion) |
| Inflammatory bowel disease              | Male   | 1 to 4    | 80 plus | Data Rich  | 1         | Latitude Over 45 (proportion)  |
| Inflammatory bowel disease              | Male   | 1 to 4    | 80 plus | Data Rich  | 1         | red meats adjusted(g)          |
| Inflammatory bowel disease              | Female | 1 to 4    | 80 plus | Global     | -1        | Education (years per capita)   |
| Inflammatory bowel disease              | Female | 1 to 4    | 80 plus | Global     | -1        | Health System Access (capped)  |
| Inflammatory bowel disease              | Female | 1 to 4    | 80 plus | Global     | -1        | Latitude 15 to 30 (proportion) |
| Inflammatory bowel disease              | Female | 1 to 4    | 80 plus | Global     | -1        | fruits adjusted(g)             |
| Inflammatory bowel disease              | Female | 1 to 4    | 80 plus | Global     | -1        | vegetables adjusted(g)         |
| Inflammatory bowel disease              | Female | 1 to 4    | 80 plus | Global     | 0         | LDI (IS per capita)            |
| Inflammatory bowel disease              | Female | 1 to 4    | 80 plus | Global     | 0         | Sociodemographic Status        |
| Inflammatory bowel disease              | Female | 1 to 4    | 80 plus | Global     | 1         | Animal Fats (kcal per capita)  |
| Inflammatory bowel disease              | Female | 1 to 4    | 80 plus | Global     | 1         | Latitude 30 to 45 (proportion) |
| Inflammatory bowel disease              | Female | 1 to 4    | 80 plus | Global     | 1         | Latitude Over 45 (proportion)  |
| Inflammatory bowel disease              | Female | 1 to 4    | 80 plus | Global     | 1         | red meats adjusted(g)          |
| Inflammatory bowel disease              | Female | 1 to 4    | 80 plus | Data Rich  | -1        | Education (years per capita)   |
| Inflammatory bowel disease              | Female | 1 to 4    | 80 plus | Data Rich  | -1        | Health System Access (capped)  |
| Inflammatory bowel disease              | Female | 1 to 4    | 80 plus | Data Rich  | -1        | Latitude 15 to 30 (proportion) |
| Inflammatory bowel disease              | Female | 1 to 4    | 80 plus | Data Rich  | -1        | fruits adjusted(g)             |
| Inflammatory bowel disease              | Female | 1 to 4    | 80 plus | Data Rich  | -1        | vegetables adjusted(g)         |
| Inflammatory bowel disease              | Female | 1 to 4    | 80 plus | Data Rich  | 0         | LDI (IS per capita)            |



**Appendix Table 10: CODEm covariates used, level of covariate, and expected direction of covariate by cause, sex, and age**

| Cause                         | Sex    | Age start | Age end | Model type | Direction | Covariate                                         |
|-------------------------------|--------|-----------|---------|------------|-----------|---------------------------------------------------|
| Inflammatory bowel disease    | Female | 1 to 4    | 80 plus | Data Rich  | 0         | Sociodemographic Status                           |
| Inflammatory bowel disease    | Female | 1 to 4    | 80 plus | Data Rich  | 1         | Animal Fats (kcal per capita)                     |
| Inflammatory bowel disease    | Female | 1 to 4    | 80 plus | Data Rich  | 1         | Latitude 30 to 45 (proportion)                    |
| Inflammatory bowel disease    | Female | 1 to 4    | 80 plus | Data Rich  | 1         | Latitude Over 45 (proportion)                     |
| Inflammatory bowel disease    | Female | 1 to 4    | 80 plus | Data Rich  | 1         | red meats adjusted(g)                             |
| Vascular intestinal disorders | Male   | 1 to 4    | 80 plus | Global     | -1        | Education (years per capita)                      |
| Vascular intestinal disorders | Male   | 1 to 4    | 80 plus | Global     | -1        | Health System Access (capped)                     |
| Vascular intestinal disorders | Male   | 1 to 4    | 80 plus | Global     | -1        | LDI (IS per capita)                               |
| Vascular intestinal disorders | Male   | 1 to 4    | 80 plus | Global     | -1        | fruits adjusted(g)                                |
| Vascular intestinal disorders | Male   | 1 to 4    | 80 plus | Global     | -1        | vegetables adjusted(g)                            |
| Vascular intestinal disorders | Male   | 1 to 4    | 80 plus | Global     | 0         | Sociodemographic Status                           |
| Vascular intestinal disorders | Male   | 1 to 4    | 80 plus | Global     | 1         | Alcohol (litres per capita)                       |
| Vascular intestinal disorders | Male   | 1 to 4    | 80 plus | Global     | 1         | Animal Fats (kcal per capita)                     |
| Vascular intestinal disorders | Male   | 1 to 4    | 80 plus | Global     | 1         | Cholesterol (total, mean per capita)              |
| Vascular intestinal disorders | Male   | 1 to 4    | 80 plus | Global     | 1         | Diabetes Age-Standardised Prevalence (proportion) |
| Vascular intestinal disorders | Male   | 1 to 4    | 80 plus | Global     | 1         | Diabetes Fasting Plasma Glucose (mmol/L)          |
| Vascular intestinal disorders | Male   | 1 to 4    | 80 plus | Global     | 1         | Latitude Over 45 (proportion)                     |
| Vascular intestinal disorders | Male   | 1 to 4    | 80 plus | Global     | 1         | Systolic Blood Pressure (mmHg)                    |
| Vascular intestinal disorders | Male   | 1 to 4    | 80 plus | Data Rich  | -1        | Education (years per capita)                      |
| Vascular intestinal disorders | Male   | 1 to 4    | 80 plus | Data Rich  | -1        | Health System Access (capped)                     |
| Vascular intestinal disorders | Male   | 1 to 4    | 80 plus | Data Rich  | -1        | LDI (IS per capita)                               |
| Vascular intestinal disorders | Male   | 1 to 4    | 80 plus | Data Rich  | -1        | fruits adjusted(g)                                |
| Vascular intestinal disorders | Male   | 1 to 4    | 80 plus | Data Rich  | -1        | vegetables adjusted(g)                            |
| Vascular intestinal disorders | Male   | 1 to 4    | 80 plus | Data Rich  | 0         | Sociodemographic Status                           |
| Vascular intestinal disorders | Male   | 1 to 4    | 80 plus | Data Rich  | 1         | Alcohol (litres per capita)                       |
| Vascular intestinal disorders | Male   | 1 to 4    | 80 plus | Data Rich  | 1         | Animal Fats (kcal per capita)                     |
| Vascular intestinal disorders | Male   | 1 to 4    | 80 plus | Data Rich  | 1         | Cholesterol (total, mean per capita)              |
| Vascular intestinal disorders | Male   | 1 to 4    | 80 plus | Data Rich  | 1         | Diabetes Age-Standardised Prevalence (proportion) |
| Vascular intestinal disorders | Male   | 1 to 4    | 80 plus | Data Rich  | 1         | Diabetes Fasting Plasma Glucose (mmol/L)          |
| Vascular intestinal disorders | Male   | 1 to 4    | 80 plus | Data Rich  | 1         | Latitude Over 45 (proportion)                     |
| Vascular intestinal disorders | Male   | 1 to 4    | 80 plus | Data Rich  | 1         | Systolic Blood Pressure (mmHg)                    |
| Vascular intestinal disorders | Female | 1 to 4    | 80 plus | Global     | -1        | Education (years per capita)                      |
| Vascular intestinal disorders | Female | 1 to 4    | 80 plus | Global     | -1        | Health System Access (capped)                     |
| Vascular intestinal disorders | Female | 1 to 4    | 80 plus | Global     | -1        | LDI (IS per capita)                               |
| Vascular intestinal disorders | Female | 1 to 4    | 80 plus | Global     | -1        | fruits adjusted(g)                                |
| Vascular intestinal disorders | Female | 1 to 4    | 80 plus | Global     | -1        | vegetables adjusted(g)                            |
| Vascular intestinal disorders | Female | 1 to 4    | 80 plus | Global     | 0         | Sociodemographic Status                           |
| Vascular intestinal disorders | Female | 1 to 4    | 80 plus | Global     | 1         | Alcohol (litres per capita)                       |
| Vascular intestinal disorders | Female | 1 to 4    | 80 plus | Global     | 1         | Animal Fats (kcal per capita)                     |
| Vascular intestinal disorders | Female | 1 to 4    | 80 plus | Global     | 1         | Cholesterol (total, mean per capita)              |
| Vascular intestinal disorders | Female | 1 to 4    | 80 plus | Global     | 1         | Diabetes Age-Standardised Prevalence (proportion) |
| Vascular intestinal disorders | Female | 1 to 4    | 80 plus | Global     | 1         | Diabetes Fasting Plasma Glucose (mmol/L)          |
| Vascular intestinal disorders | Female | 1 to 4    | 80 plus | Global     | 1         | Latitude Over 45 (proportion)                     |
| Vascular intestinal disorders | Female | 1 to 4    | 80 plus | Global     | 1         | Systolic Blood Pressure (mmHg)                    |

**Appendix Table 10: CODEm covariates used, level of covariate, and expected direction of covariate by cause, sex, and age**

| Cause                            | Sex    | Age start | Age end | Model type | Direction | Covariate                                         |
|----------------------------------|--------|-----------|---------|------------|-----------|---------------------------------------------------|
| Vascular intestinal disorders    | Female | 1 to 4    | 80 plus | Data Rich  | -1        | Education (years per capita)                      |
| Vascular intestinal disorders    | Female | 1 to 4    | 80 plus | Data Rich  | -1        | Health System Access (capped)                     |
| Vascular intestinal disorders    | Female | 1 to 4    | 80 plus | Data Rich  | -1        | LDI (IS per capita)                               |
| Vascular intestinal disorders    | Female | 1 to 4    | 80 plus | Data Rich  | -1        | fruits adjusted(g)                                |
| Vascular intestinal disorders    | Female | 1 to 4    | 80 plus | Data Rich  | -1        | vegetables adjusted(g)                            |
| Vascular intestinal disorders    | Female | 1 to 4    | 80 plus | Data Rich  | 0         | Sociodemographic Status                           |
| Vascular intestinal disorders    | Female | 1 to 4    | 80 plus | Data Rich  | 1         | Alcohol (litres per capita)                       |
| Vascular intestinal disorders    | Female | 1 to 4    | 80 plus | Data Rich  | 1         | Animal Fats (kcal per capita)                     |
| Vascular intestinal disorders    | Female | 1 to 4    | 80 plus | Data Rich  | 1         | Cholesterol (total, mean per capita)              |
| Vascular intestinal disorders    | Female | 1 to 4    | 80 plus | Data Rich  | 1         | Diabetes Age-Standardised Prevalence (proportion) |
| Vascular intestinal disorders    | Female | 1 to 4    | 80 plus | Data Rich  | 1         | Diabetes Fasting Plasma Glucose (mmol/L)          |
| Vascular intestinal disorders    | Female | 1 to 4    | 80 plus | Data Rich  | 1         | Latitude Over 45 (proportion)                     |
| Vascular intestinal disorders    | Female | 1 to 4    | 80 plus | Data Rich  | 1         | Systolic Blood Pressure (mmHg)                    |
| Gallbladder and biliary diseases | Male   | 1 to 4    | 80 plus | Global     | -1        | Health System Access (capped)                     |
| Gallbladder and biliary diseases | Male   | 1 to 4    | 80 plus | Global     | 0         | Education (years per capita)                      |
| Gallbladder and biliary diseases | Male   | 1 to 4    | 80 plus | Global     | 0         | LDI (IS per capita)                               |
| Gallbladder and biliary diseases | Male   | 1 to 4    | 80 plus | Global     | 0         | Sociodemographic Status                           |
| Gallbladder and biliary diseases | Male   | 1 to 4    | 80 plus | Global     | 1         | Alcohol (litres per capita)                       |
| Gallbladder and biliary diseases | Male   | 1 to 4    | 80 plus | Global     | 1         | Animal Fats (kcal per capita)                     |
| Gallbladder and biliary diseases | Male   | 1 to 4    | 80 plus | Global     | 1         | Mean BMI                                          |
| Gallbladder and biliary diseases | Male   | 1 to 4    | 80 plus | Global     | 1         | Population Over 65 (proportion)                   |
| Gallbladder and biliary diseases | Male   | 1 to 4    | 80 plus | Global     | 1         | red meats adjusted(g)                             |
| Gallbladder and biliary diseases | Male   | 1 to 4    | 80 plus | Data Rich  | -1        | Health System Access (capped)                     |
| Gallbladder and biliary diseases | Male   | 1 to 4    | 80 plus | Data Rich  | 0         | Education (years per capita)                      |
| Gallbladder and biliary diseases | Male   | 1 to 4    | 80 plus | Data Rich  | 0         | LDI (IS per capita)                               |
| Gallbladder and biliary diseases | Male   | 1 to 4    | 80 plus | Data Rich  | 0         | Sociodemographic Status                           |
| Gallbladder and biliary diseases | Male   | 1 to 4    | 80 plus | Data Rich  | 1         | Alcohol (litres per capita)                       |
| Gallbladder and biliary diseases | Male   | 1 to 4    | 80 plus | Data Rich  | 1         | Animal Fats (kcal per capita)                     |
| Gallbladder and biliary diseases | Male   | 1 to 4    | 80 plus | Data Rich  | 1         | Mean BMI                                          |
| Gallbladder and biliary diseases | Male   | 1 to 4    | 80 plus | Data Rich  | 1         | Population Over 65 (proportion)                   |
| Gallbladder and biliary diseases | Male   | 1 to 4    | 80 plus | Data Rich  | 1         | red meats adjusted(g)                             |
| Gallbladder and biliary diseases | Female | 1 to 4    | 80 plus | Global     | -1        | Health System Access (capped)                     |
| Gallbladder and biliary diseases | Female | 1 to 4    | 80 plus | Global     | 0         | Education (years per capita)                      |
| Gallbladder and biliary diseases | Female | 1 to 4    | 80 plus | Global     | 0         | LDI (IS per capita)                               |
| Gallbladder and biliary diseases | Female | 1 to 4    | 80 plus | Global     | 0         | Sociodemographic Status                           |
| Gallbladder and biliary diseases | Female | 1 to 4    | 80 plus | Global     | 1         | Alcohol (litres per capita)                       |
| Gallbladder and biliary diseases | Female | 1 to 4    | 80 plus | Global     | 1         | Animal Fats (kcal per capita)                     |
| Gallbladder and biliary diseases | Female | 1 to 4    | 80 plus | Global     | 1         | Mean BMI                                          |
| Gallbladder and biliary diseases | Female | 1 to 4    | 80 plus | Global     | 1         | Population Over 65 (proportion)                   |
| Gallbladder and biliary diseases | Female | 1 to 4    | 80 plus | Global     | 1         | red meats adjusted(g)                             |
| Gallbladder and biliary diseases | Female | 1 to 4    | 80 plus | Data Rich  | -1        | Health System Access (capped)                     |
| Gallbladder and biliary diseases | Female | 1 to 4    | 80 plus | Data Rich  | 0         | Education (years per capita)                      |
| Gallbladder and biliary diseases | Female | 1 to 4    | 80 plus | Data Rich  | 0         | LDI (IS per capita)                               |
| Gallbladder and biliary diseases | Female | 1 to 4    | 80 plus | Data Rich  | 0         | Sociodemographic Status                           |

**Appendix Table 10: CODEm covariates used, level of covariate, and expected direction of covariate by cause, sex, and age**

| Cause                            | Sex    | Age start | Age end | Model type | Direction | Covariate                                      |
|----------------------------------|--------|-----------|---------|------------|-----------|------------------------------------------------|
| Gallbladder and biliary diseases | Female | 1 to 4    | 80 plus | Data Rich  | 1         | Alcohol (litres per capita)                    |
| Gallbladder and biliary diseases | Female | 1 to 4    | 80 plus | Data Rich  | 1         | Animal Fats (kcal per capita)                  |
| Gallbladder and biliary diseases | Female | 1 to 4    | 80 plus | Data Rich  | 1         | Mean BMI                                       |
| Gallbladder and biliary diseases | Female | 1 to 4    | 80 plus | Data Rich  | 1         | Population Over 65 (proportion)                |
| Gallbladder and biliary diseases | Female | 1 to 4    | 80 plus | Data Rich  | 1         | red meats adjusted(g)                          |
| Pancreatitis                     | Male   | 1 to 4    | 80 plus | Global     | -1        | Education (years per capita)                   |
| Pancreatitis                     | Male   | 1 to 4    | 80 plus | Global     | -1        | Health System Access (capped)                  |
| Pancreatitis                     | Male   | 1 to 4    | 80 plus | Global     | 0         | LDI (IS per capita)                            |
| Pancreatitis                     | Male   | 1 to 4    | 80 plus | Global     | 0         | Sociodemographic Status                        |
| Pancreatitis                     | Male   | 1 to 4    | 80 plus | Global     | 1         | Alcohol (litres per capita)                    |
| Pancreatitis                     | Male   | 1 to 4    | 80 plus | Global     | 1         | Log-transformed SEV scalar: Pancreatit         |
| Pancreatitis                     | Male   | 1 to 4    | 80 plus | Global     | 1         | Mean BMI                                       |
| Pancreatitis                     | Male   | 1 to 4    | 80 plus | Data Rich  | -1        | Education (years per capita)                   |
| Pancreatitis                     | Male   | 1 to 4    | 80 plus | Data Rich  | -1        | Health System Access (capped)                  |
| Pancreatitis                     | Male   | 1 to 4    | 80 plus | Data Rich  | 0         | LDI (IS per capita)                            |
| Pancreatitis                     | Male   | 1 to 4    | 80 plus | Data Rich  | 0         | Sociodemographic Status                        |
| Pancreatitis                     | Male   | 1 to 4    | 80 plus | Data Rich  | 1         | Alcohol (litres per capita)                    |
| Pancreatitis                     | Male   | 1 to 4    | 80 plus | Data Rich  | 1         | Log-transformed SEV scalar: Pancreatit         |
| Pancreatitis                     | Male   | 1 to 4    | 80 plus | Data Rich  | 1         | Mean BMI                                       |
| Pancreatitis                     | Female | 1 to 4    | 80 plus | Global     | -1        | Education (years per capita)                   |
| Pancreatitis                     | Female | 1 to 4    | 80 plus | Global     | -1        | Health System Access (capped)                  |
| Pancreatitis                     | Female | 1 to 4    | 80 plus | Global     | 0         | LDI (IS per capita)                            |
| Pancreatitis                     | Female | 1 to 4    | 80 plus | Global     | 0         | Sociodemographic Status                        |
| Pancreatitis                     | Female | 1 to 4    | 80 plus | Global     | 1         | Alcohol (litres per capita)                    |
| Pancreatitis                     | Female | 1 to 4    | 80 plus | Global     | 1         | Log-transformed SEV scalar: Pancreatit         |
| Pancreatitis                     | Female | 1 to 4    | 80 plus | Global     | 1         | Mean BMI                                       |
| Pancreatitis                     | Female | 1 to 4    | 80 plus | Data Rich  | -1        | Education (years per capita)                   |
| Pancreatitis                     | Female | 1 to 4    | 80 plus | Data Rich  | -1        | Health System Access (capped)                  |
| Pancreatitis                     | Female | 1 to 4    | 80 plus | Data Rich  | 0         | LDI (IS per capita)                            |
| Pancreatitis                     | Female | 1 to 4    | 80 plus | Data Rich  | 0         | Sociodemographic Status                        |
| Pancreatitis                     | Female | 1 to 4    | 80 plus | Data Rich  | 1         | Alcohol (litres per capita)                    |
| Pancreatitis                     | Female | 1 to 4    | 80 plus | Data Rich  | 1         | Log-transformed SEV scalar: Pancreatit         |
| Pancreatitis                     | Female | 1 to 4    | 80 plus | Data Rich  | 1         | Mean BMI                                       |
| Other digestive diseases         | Male   | 1 to 4    | 80 plus | Global     | -1        | Education (years per capita)                   |
| Other digestive diseases         | Male   | 1 to 4    | 80 plus | Global     | -1        | Health System Access 2 (unitless)              |
| Other digestive diseases         | Male   | 1 to 4    | 80 plus | Global     | -1        | Improved Water Source (proportion with access) |
| Other digestive diseases         | Male   | 1 to 4    | 80 plus | Global     | -1        | LDI (IS per capita)                            |
| Other digestive diseases         | Male   | 1 to 4    | 80 plus | Global     | -1        | Sanitation (proportion with access)            |
| Other digestive diseases         | Male   | 1 to 4    | 80 plus | Global     | -1        | fruits adjusted(g)                             |
| Other digestive diseases         | Male   | 1 to 4    | 80 plus | Global     | 0         | Sociodemographic Status                        |
| Other digestive diseases         | Male   | 1 to 4    | 80 plus | Global     | 0         | vegetables adjusted(g)                         |
| Other digestive diseases         | Male   | 1 to 4    | 80 plus | Global     | 1         | Alcohol (litres per capita)                    |
| Other digestive diseases         | Male   | 1 to 4    | 80 plus | Global     | 1         | Animal Fats (kcal per capita)                  |
| Other digestive diseases         | Male   | 1 to 4    | 80 plus | Global     | 1         | Cumulative Cigarettes (10 Years)               |

**Appendix Table 10: CODEm covariates used, level of covariate, and expected direction of covariate by cause, sex, and age**

| Cause                    | Sex    | Age start | Age end | Model type | Direction | Covariate                                         |
|--------------------------|--------|-----------|---------|------------|-----------|---------------------------------------------------|
| Other digestive diseases | Male   | 1 to 4    | 80 plus | Global     | 1         | Cumulative Cigarettes (5 Years)                   |
| Other digestive diseases | Male   | 1 to 4    | 80 plus | Global     | 1         | Diabetes Age-Standardised Prevalence (proportion) |
| Other digestive diseases | Male   | 1 to 4    | 80 plus | Global     | 1         | Malnutrition (proportion <2SD weight for age)     |
| Other digestive diseases | Male   | 1 to 4    | 80 plus | Global     | 1         | Mean BMI                                          |
| Other digestive diseases | Male   | 1 to 4    | 80 plus | Global     | 1         | Smoking Prevalence                                |
| Other digestive diseases | Male   | 1 to 4    | 80 plus | Global     | 1         | red meats adjusted(g)                             |
| Other digestive diseases | Male   | 1 to 4    | 80 plus | Data Rich  | -1        | Education (years per capita)                      |
| Other digestive diseases | Male   | 1 to 4    | 80 plus | Data Rich  | -1        | Health System Access 2 (unitless)                 |
| Other digestive diseases | Male   | 1 to 4    | 80 plus | Data Rich  | -1        | Improved Water Source (proportion with access)    |
| Other digestive diseases | Male   | 1 to 4    | 80 plus | Data Rich  | -1        | LDI (IS per capita)                               |
| Other digestive diseases | Male   | 1 to 4    | 80 plus | Data Rich  | -1        | Sanitation (proportion with access)               |
| Other digestive diseases | Male   | 1 to 4    | 80 plus | Data Rich  | -1        | fruits adjusted(g)                                |
| Other digestive diseases | Male   | 1 to 4    | 80 plus | Data Rich  | 0         | Sociodemographic Status                           |
| Other digestive diseases | Male   | 1 to 4    | 80 plus | Data Rich  | 0         | vegetables adjusted(g)                            |
| Other digestive diseases | Male   | 1 to 4    | 80 plus | Data Rich  | 1         | Alcohol (litres per capita)                       |
| Other digestive diseases | Male   | 1 to 4    | 80 plus | Data Rich  | 1         | Animal Fats (kcal per capita)                     |
| Other digestive diseases | Male   | 1 to 4    | 80 plus | Data Rich  | 1         | Cumulative Cigarettes (10 Years)                  |
| Other digestive diseases | Male   | 1 to 4    | 80 plus | Data Rich  | 1         | Cumulative Cigarettes (5 Years)                   |
| Other digestive diseases | Male   | 1 to 4    | 80 plus | Data Rich  | 1         | Diabetes Age-Standardised Prevalence (proportion) |
| Other digestive diseases | Male   | 1 to 4    | 80 plus | Data Rich  | 1         | Malnutrition (proportion <2SD weight for age)     |
| Other digestive diseases | Male   | 1 to 4    | 80 plus | Data Rich  | 1         | Mean BMI                                          |
| Other digestive diseases | Male   | 1 to 4    | 80 plus | Data Rich  | 1         | Smoking Prevalence                                |
| Other digestive diseases | Male   | 1 to 4    | 80 plus | Data Rich  | 1         | red meats adjusted(g)                             |
| Other digestive diseases | Female | 1 to 4    | 80 plus | Global     | -1        | Education (years per capita)                      |
| Other digestive diseases | Female | 1 to 4    | 80 plus | Global     | -1        | Health System Access 2 (unitless)                 |
| Other digestive diseases | Female | 1 to 4    | 80 plus | Global     | -1        | Improved Water Source (proportion with access)    |
| Other digestive diseases | Female | 1 to 4    | 80 plus | Global     | -1        | LDI (IS per capita)                               |
| Other digestive diseases | Female | 1 to 4    | 80 plus | Global     | -1        | Sanitation (proportion with access)               |
| Other digestive diseases | Female | 1 to 4    | 80 plus | Global     | -1        | fruits adjusted(g)                                |
| Other digestive diseases | Female | 1 to 4    | 80 plus | Global     | 0         | Sociodemographic Status                           |
| Other digestive diseases | Female | 1 to 4    | 80 plus | Global     | 0         | vegetables adjusted(g)                            |
| Other digestive diseases | Female | 1 to 4    | 80 plus | Global     | 1         | Alcohol (litres per capita)                       |
| Other digestive diseases | Female | 1 to 4    | 80 plus | Global     | 1         | Animal Fats (kcal per capita)                     |
| Other digestive diseases | Female | 1 to 4    | 80 plus | Global     | 1         | Cumulative Cigarettes (10 Years)                  |
| Other digestive diseases | Female | 1 to 4    | 80 plus | Global     | 1         | Cumulative Cigarettes (5 Years)                   |
| Other digestive diseases | Female | 1 to 4    | 80 plus | Global     | 1         | Diabetes Age-Standardised Prevalence (proportion) |
| Other digestive diseases | Female | 1 to 4    | 80 plus | Global     | 1         | Malnutrition (proportion <2SD weight for age)     |
| Other digestive diseases | Female | 1 to 4    | 80 plus | Global     | 1         | Mean BMI                                          |
| Other digestive diseases | Female | 1 to 4    | 80 plus | Global     | 1         | Smoking Prevalence                                |
| Other digestive diseases | Female | 1 to 4    | 80 plus | Global     | 1         | red meats adjusted(g)                             |
| Other digestive diseases | Female | 1 to 4    | 80 plus | Data Rich  | -1        | Education (years per capita)                      |
| Other digestive diseases | Female | 1 to 4    | 80 plus | Data Rich  | -1        | Health System Access 2 (unitless)                 |
| Other digestive diseases | Female | 1 to 4    | 80 plus | Data Rich  | -1        | Improved Water Source (proportion with access)    |
| Other digestive diseases | Female | 1 to 4    | 80 plus | Data Rich  | -1        | LDI (IS per capita)                               |

**Appendix Table 10: CODEm covariates used, level of covariate, and expected direction of covariate by cause, sex, and age**

| Cause                    | Sex    | Age start | Age end | Model type | Direction | Covariate                                         |
|--------------------------|--------|-----------|---------|------------|-----------|---------------------------------------------------|
| Other digestive diseases | Female | 1 to 4    | 80 plus | Data Rich  | -1        | Sanitation (proportion with access)               |
| Other digestive diseases | Female | 1 to 4    | 80 plus | Data Rich  | -1        | fruits adjusted(g)                                |
| Other digestive diseases | Female | 1 to 4    | 80 plus | Data Rich  | 0         | Sociodemographic Status                           |
| Other digestive diseases | Female | 1 to 4    | 80 plus | Data Rich  | 0         | vegetables adjusted(g)                            |
| Other digestive diseases | Female | 1 to 4    | 80 plus | Data Rich  | 1         | Alcohol (litres per capita)                       |
| Other digestive diseases | Female | 1 to 4    | 80 plus | Data Rich  | 1         | Animal Fats (kcal per capita)                     |
| Other digestive diseases | Female | 1 to 4    | 80 plus | Data Rich  | 1         | Cumulative Cigarettes (10 Years)                  |
| Other digestive diseases | Female | 1 to 4    | 80 plus | Data Rich  | 1         | Cumulative Cigarettes (5 Years)                   |
| Other digestive diseases | Female | 1 to 4    | 80 plus | Data Rich  | 1         | Diabetes Age-Standardised Prevalence (proportion) |
| Other digestive diseases | Female | 1 to 4    | 80 plus | Data Rich  | 1         | Malnutrition (proportion <2SD weight for age)     |
| Other digestive diseases | Female | 1 to 4    | 80 plus | Data Rich  | 1         | Mean BMI                                          |
| Other digestive diseases | Female | 1 to 4    | 80 plus | Data Rich  | 1         | Smoking Prevalence                                |
| Other digestive diseases | Female | 1 to 4    | 80 plus | Data Rich  | 1         | red meats adjusted(g)                             |
| Parkinson disease        | Male   | 20 to 24  | 80 plus | Global     | -1        | Education (years per capita)                      |
| Parkinson disease        | Male   | 20 to 24  | 80 plus | Global     | -1        | Fruits (kcal per capita)                          |
| Parkinson disease        | Male   | 20 to 24  | 80 plus | Global     | -1        | Health System Access (capped)                     |
| Parkinson disease        | Male   | 20 to 24  | 80 plus | Global     | 0         | Cumulative Cigarettes (10 Years)                  |
| Parkinson disease        | Male   | 20 to 24  | 80 plus | Global     | 0         | Cumulative Cigarettes (5 Years)                   |
| Parkinson disease        | Male   | 20 to 24  | 80 plus | Global     | 0         | Improved Water Source (proportion with access)    |
| Parkinson disease        | Male   | 20 to 24  | 80 plus | Global     | 0         | LDI (I\$ per capita)                              |
| Parkinson disease        | Male   | 20 to 24  | 80 plus | Global     | 0         | Sanitation (proportion with access)               |
| Parkinson disease        | Male   | 20 to 24  | 80 plus | Global     | 1         | Absolute value of average latitude                |
| Parkinson disease        | Male   | 20 to 24  | 80 plus | Global     | 1         | Cholesterol (total, mean per capita)              |
| Parkinson disease        | Male   | 20 to 24  | 80 plus | Global     | 1         | Sociodemographic Status                           |
| Parkinson disease        | Male   | 20 to 24  | 80 plus | Data Rich  | -1        | Education (years per capita)                      |
| Parkinson disease        | Male   | 20 to 24  | 80 plus | Data Rich  | -1        | Fruits (kcal per capita)                          |
| Parkinson disease        | Male   | 20 to 24  | 80 plus | Data Rich  | -1        | Health System Access (capped)                     |
| Parkinson disease        | Male   | 20 to 24  | 80 plus | Data Rich  | 0         | Cumulative Cigarettes (10 Years)                  |
| Parkinson disease        | Male   | 20 to 24  | 80 plus | Data Rich  | 0         | Cumulative Cigarettes (5 Years)                   |
| Parkinson disease        | Male   | 20 to 24  | 80 plus | Data Rich  | 0         | Improved Water Source (proportion with access)    |
| Parkinson disease        | Male   | 20 to 24  | 80 plus | Data Rich  | 0         | LDI (I\$ per capita)                              |
| Parkinson disease        | Male   | 20 to 24  | 80 plus | Data Rich  | 0         | Sanitation (proportion with access)               |
| Parkinson disease        | Male   | 20 to 24  | 80 plus | Data Rich  | 1         | Absolute value of average latitude                |
| Parkinson disease        | Male   | 20 to 24  | 80 plus | Data Rich  | 1         | Cholesterol (total, mean per capita)              |
| Parkinson disease        | Male   | 20 to 24  | 80 plus | Data Rich  | 1         | Sociodemographic Status                           |
| Parkinson disease        | Female | 20 to 24  | 80 plus | Global     | -1        | Education (years per capita)                      |
| Parkinson disease        | Female | 20 to 24  | 80 plus | Global     | -1        | Fruits (kcal per capita)                          |
| Parkinson disease        | Female | 20 to 24  | 80 plus | Global     | -1        | Health System Access (capped)                     |
| Parkinson disease        | Female | 20 to 24  | 80 plus | Global     | 0         | Cumulative Cigarettes (10 Years)                  |
| Parkinson disease        | Female | 20 to 24  | 80 plus | Global     | 0         | Cumulative Cigarettes (5 Years)                   |
| Parkinson disease        | Female | 20 to 24  | 80 plus | Global     | 0         | Improved Water Source (proportion with access)    |
| Parkinson disease        | Female | 20 to 24  | 80 plus | Global     | 0         | LDI (I\$ per capita)                              |
| Parkinson disease        | Female | 20 to 24  | 80 plus | Global     | 0         | Sanitation (proportion with access)               |
| Parkinson disease        | Female | 20 to 24  | 80 plus | Global     | 1         | Absolute value of average latitude                |

**Appendix Table 10: CODEm covariates used, level of covariate, and expected direction of covariate by cause, sex, and age**

| Cause             | Sex    | Age start     | Age end | Model type | Direction | Covariate                                      |
|-------------------|--------|---------------|---------|------------|-----------|------------------------------------------------|
| Parkinson disease | Female | 20 to 24      | 80 plus | Global     | 1         | Cholesterol (total, mean per capita)           |
| Parkinson disease | Female | 20 to 24      | 80 plus | Global     | 1         | Sociodemographic Status                        |
| Parkinson disease | Female | 20 to 24      | 80 plus | Data Rich  | -1        | Education (years per capita)                   |
| Parkinson disease | Female | 20 to 24      | 80 plus | Data Rich  | -1        | Fruits (kcal per capita)                       |
| Parkinson disease | Female | 20 to 24      | 80 plus | Data Rich  | -1        | Health System Access (capped)                  |
| Parkinson disease | Female | 20 to 24      | 80 plus | Data Rich  | 0         | Cumulative Cigarettes (10 Years)               |
| Parkinson disease | Female | 20 to 24      | 80 plus | Data Rich  | 0         | Cumulative Cigarettes (5 Years)                |
| Parkinson disease | Female | 20 to 24      | 80 plus | Data Rich  | 0         | Improved Water Source (proportion with access) |
| Parkinson disease | Female | 20 to 24      | 80 plus | Data Rich  | 0         | LDI (IS per capita)                            |
| Parkinson disease | Female | 20 to 24      | 80 plus | Data Rich  | 0         | Sanitation (proportion with access)            |
| Parkinson disease | Female | 20 to 24      | 80 plus | Data Rich  | 1         | Absolute value of average latitude             |
| Parkinson disease | Female | 20 to 24      | 80 plus | Data Rich  | 1         | Cholesterol (total, mean per capita)           |
| Parkinson disease | Female | 20 to 24      | 80 plus | Data Rich  | 1         | Sociodemographic Status                        |
| Epilepsy          | Male   | Post Neonatal | 80 plus | Global     | -1        | Education (years per capita)                   |
| Epilepsy          | Male   | Post Neonatal | 80 plus | Global     | -1        | Health System Access (capped)                  |
| Epilepsy          | Male   | Post Neonatal | 80 plus | Global     | -1        | LDI (IS per capita)                            |
| Epilepsy          | Male   | Post Neonatal | 80 plus | Global     | -1        | Sociodemographic Status                        |
| Epilepsy          | Male   | Post Neonatal | 80 plus | Global     | 1         | Cholesterol (total, mean per capita)           |
| Epilepsy          | Male   | Post Neonatal | 80 plus | Global     | 1         | Cumulative Cigarettes (10 Years)               |
| Epilepsy          | Male   | Post Neonatal | 80 plus | Global     | 1         | Cumulative Cigarettes (5 Years)                |
| Epilepsy          | Male   | Post Neonatal | 80 plus | Global     | 1         | Log-transformed SEV scalar: Epilepsy           |
| Epilepsy          | Male   | Post Neonatal | 80 plus | Global     | 1         | Mean BMI                                       |
| Epilepsy          | Male   | Post Neonatal | 80 plus | Global     | 1         | Pig Meat (kg per capita)                       |
| Epilepsy          | Male   | Post Neonatal | 80 plus | Global     | 1         | Pigs (per capita)                              |
| Epilepsy          | Male   | Post Neonatal | 80 plus | Global     | 1         | Systolic Blood Pressure (mmHg)                 |
| Epilepsy          | Male   | Post Neonatal | 80 plus | Data Rich  | -1        | Education (years per capita)                   |
| Epilepsy          | Male   | Post Neonatal | 80 plus | Data Rich  | -1        | Health System Access (capped)                  |
| Epilepsy          | Male   | Post Neonatal | 80 plus | Data Rich  | -1        | LDI (IS per capita)                            |
| Epilepsy          | Male   | Post Neonatal | 80 plus | Data Rich  | -1        | Sociodemographic Status                        |
| Epilepsy          | Male   | Post Neonatal | 80 plus | Data Rich  | 1         | Cholesterol (total, mean per capita)           |
| Epilepsy          | Male   | Post Neonatal | 80 plus | Data Rich  | 1         | Cumulative Cigarettes (10 Years)               |
| Epilepsy          | Male   | Post Neonatal | 80 plus | Data Rich  | 1         | Cumulative Cigarettes (5 Years)                |
| Epilepsy          | Male   | Post Neonatal | 80 plus | Data Rich  | 1         | Log-transformed SEV scalar: Epilepsy           |
| Epilepsy          | Male   | Post Neonatal | 80 plus | Data Rich  | 1         | Mean BMI                                       |
| Epilepsy          | Male   | Post Neonatal | 80 plus | Data Rich  | 1         | Pig Meat (kg per capita)                       |
| Epilepsy          | Male   | Post Neonatal | 80 plus | Data Rich  | 1         | Pigs (per capita)                              |
| Epilepsy          | Male   | Post Neonatal | 80 plus | Data Rich  | 1         | Systolic Blood Pressure (mmHg)                 |
| Epilepsy          | Female | Post Neonatal | 80 plus | Global     | -1        | Education (years per capita)                   |
| Epilepsy          | Female | Post Neonatal | 80 plus | Global     | -1        | Health System Access (capped)                  |
| Epilepsy          | Female | Post Neonatal | 80 plus | Global     | -1        | LDI (IS per capita)                            |
| Epilepsy          | Female | Post Neonatal | 80 plus | Global     | -1        | Sociodemographic Status                        |
| Epilepsy          | Female | Post Neonatal | 80 plus | Global     | 1         | Cholesterol (total, mean per capita)           |
| Epilepsy          | Female | Post Neonatal | 80 plus | Global     | 1         | Cumulative Cigarettes (10 Years)               |
| Epilepsy          | Female | Post Neonatal | 80 plus | Global     | 1         | Cumulative Cigarettes (5 Years)                |

**Appendix Table 10: CODEm covariates used, level of covariate, and expected direction of covariate by cause, sex, and age**

| Cause              | Sex    | Age start     | Age end | Model type | Direction | Covariate                            |
|--------------------|--------|---------------|---------|------------|-----------|--------------------------------------|
| Epilepsy           | Female | Post Neonatal | 80 plus | Global     | 1         | Log-transformed SEV scalar: Epilepsy |
| Epilepsy           | Female | Post Neonatal | 80 plus | Global     | 1         | Mean BMI                             |
| Epilepsy           | Female | Post Neonatal | 80 plus | Global     | 1         | Pig Meat (kg per capita)             |
| Epilepsy           | Female | Post Neonatal | 80 plus | Global     | 1         | Pigs (per capita)                    |
| Epilepsy           | Female | Post Neonatal | 80 plus | Global     | 1         | Systolic Blood Pressure (mmHg)       |
| Epilepsy           | Female | Post Neonatal | 80 plus | Data Rich  | -1        | Education (years per capita)         |
| Epilepsy           | Female | Post Neonatal | 80 plus | Data Rich  | -1        | Health System Access (capped)        |
| Epilepsy           | Female | Post Neonatal | 80 plus | Data Rich  | -1        | LDI (IS per capita)                  |
| Epilepsy           | Female | Post Neonatal | 80 plus | Data Rich  | -1        | Sociodemographic Status              |
| Epilepsy           | Female | Post Neonatal | 80 plus | Data Rich  | 1         | Cholesterol (total, mean per capita) |
| Epilepsy           | Female | Post Neonatal | 80 plus | Data Rich  | 1         | Cumulative Cigarettes (10 Years)     |
| Epilepsy           | Female | Post Neonatal | 80 plus | Data Rich  | 1         | Cumulative Cigarettes (5 Years)      |
| Epilepsy           | Female | Post Neonatal | 80 plus | Data Rich  | 1         | Log-transformed SEV scalar: Epilepsy |
| Epilepsy           | Female | Post Neonatal | 80 plus | Data Rich  | 1         | Mean BMI                             |
| Epilepsy           | Female | Post Neonatal | 80 plus | Data Rich  | 1         | Pig Meat (kg per capita)             |
| Epilepsy           | Female | Post Neonatal | 80 plus | Data Rich  | 1         | Pigs (per capita)                    |
| Epilepsy           | Female | Post Neonatal | 80 plus | Data Rich  | 1         | Systolic Blood Pressure (mmHg)       |
| Multiple sclerosis | Male   | 20 to 24      | 80 plus | Global     | -1        | Education (years per capita)         |
| Multiple sclerosis | Male   | 20 to 24      | 80 plus | Global     | -1        | Health System Access (capped)        |
| Multiple sclerosis | Male   | 20 to 24      | 80 plus | Global     | -1        | LDI (IS per capita)                  |
| Multiple sclerosis | Male   | 20 to 24      | 80 plus | Global     | 1         | Absolute value of average latitude   |
| Multiple sclerosis | Male   | 20 to 24      | 80 plus | Global     | 1         | Animal Fats (kcal per capita)        |
| Multiple sclerosis | Male   | 20 to 24      | 80 plus | Global     | 1         | Cholesterol (total, mean per capita) |
| Multiple sclerosis | Male   | 20 to 24      | 80 plus | Global     | 1         | Cumulative Cigarettes (10 Years)     |
| Multiple sclerosis | Male   | 20 to 24      | 80 plus | Global     | 1         | Cumulative Cigarettes (5 Years)      |
| Multiple sclerosis | Male   | 20 to 24      | 80 plus | Global     | 1         | Smoking Prevalence                   |
| Multiple sclerosis | Male   | 20 to 24      | 80 plus | Global     | 1         | Sociodemographic Status              |
| Multiple sclerosis | Male   | 20 to 24      | 80 plus | Data Rich  | -1        | Education (years per capita)         |
| Multiple sclerosis | Male   | 20 to 24      | 80 plus | Data Rich  | -1        | Health System Access (capped)        |
| Multiple sclerosis | Male   | 20 to 24      | 80 plus | Data Rich  | -1        | LDI (IS per capita)                  |
| Multiple sclerosis | Male   | 20 to 24      | 80 plus | Data Rich  | 1         | Absolute value of average latitude   |
| Multiple sclerosis | Male   | 20 to 24      | 80 plus | Data Rich  | 1         | Animal Fats (kcal per capita)        |
| Multiple sclerosis | Male   | 20 to 24      | 80 plus | Data Rich  | 1         | Cholesterol (total, mean per capita) |
| Multiple sclerosis | Male   | 20 to 24      | 80 plus | Data Rich  | 1         | Cumulative Cigarettes (10 Years)     |
| Multiple sclerosis | Male   | 20 to 24      | 80 plus | Data Rich  | 1         | Cumulative Cigarettes (5 Years)      |
| Multiple sclerosis | Male   | 20 to 24      | 80 plus | Data Rich  | 1         | Smoking Prevalence                   |
| Multiple sclerosis | Male   | 20 to 24      | 80 plus | Data Rich  | 1         | Sociodemographic Status              |
| Multiple sclerosis | Female | 20 to 24      | 80 plus | Global     | -1        | Education (years per capita)         |
| Multiple sclerosis | Female | 20 to 24      | 80 plus | Global     | -1        | Health System Access (capped)        |
| Multiple sclerosis | Female | 20 to 24      | 80 plus | Global     | -1        | LDI (IS per capita)                  |
| Multiple sclerosis | Female | 20 to 24      | 80 plus | Global     | 1         | Absolute value of average latitude   |
| Multiple sclerosis | Female | 20 to 24      | 80 plus | Global     | 1         | Animal Fats (kcal per capita)        |
| Multiple sclerosis | Female | 20 to 24      | 80 plus | Global     | 1         | Cholesterol (total, mean per capita) |
| Multiple sclerosis | Female | 20 to 24      | 80 plus | Global     | 1         | Cumulative Cigarettes (10 Years)     |

**Appendix Table 10: CODEm covariates used, level of covariate, and expected direction of covariate by cause, sex, and age**

| Cause                | Sex    | Age start      | Age end | Model type | Direction | Covariate                                      |
|----------------------|--------|----------------|---------|------------|-----------|------------------------------------------------|
| Multiple sclerosis   | Female | 20 to 24       | 80 plus | Global     | 1         | Cumulative Cigarettes (5 Years)                |
| Multiple sclerosis   | Female | 20 to 24       | 80 plus | Global     | 1         | Smoking Prevalence                             |
| Multiple sclerosis   | Female | 20 to 24       | 80 plus | Global     | 1         | Sociodemographic Status                        |
| Multiple sclerosis   | Female | 20 to 24       | 80 plus | Data Rich  | -1        | Education (years per capita)                   |
| Multiple sclerosis   | Female | 20 to 24       | 80 plus | Data Rich  | -1        | Health System Access (capped)                  |
| Multiple sclerosis   | Female | 20 to 24       | 80 plus | Data Rich  | -1        | LDI (IS per capita)                            |
| Multiple sclerosis   | Female | 20 to 24       | 80 plus | Data Rich  | 1         | Absolute value of average latitude             |
| Multiple sclerosis   | Female | 20 to 24       | 80 plus | Data Rich  | 1         | Animal Fats (kcal per capita)                  |
| Multiple sclerosis   | Female | 20 to 24       | 80 plus | Data Rich  | 1         | Cholesterol (total, mean per capita)           |
| Multiple sclerosis   | Female | 20 to 24       | 80 plus | Data Rich  | 1         | Cumulative Cigarettes (10 Years)               |
| Multiple sclerosis   | Female | 20 to 24       | 80 plus | Data Rich  | 1         | Cumulative Cigarettes (5 Years)                |
| Multiple sclerosis   | Female | 20 to 24       | 80 plus | Data Rich  | 1         | Smoking Prevalence                             |
| Multiple sclerosis   | Female | 20 to 24       | 80 plus | Data Rich  | 1         | Sociodemographic Status                        |
| Motor neuron disease | Male   | Early Neonatal | 80 plus | Global     | -1        | Health System Access (capped)                  |
| Motor neuron disease | Male   | Early Neonatal | 80 plus | Global     | 0         | Cholesterol (total, mean per capita)           |
| Motor neuron disease | Male   | Early Neonatal | 80 plus | Global     | 0         | Education (years per capita)                   |
| Motor neuron disease | Male   | Early Neonatal | 80 plus | Global     | 0         | Fruits (kcal per capita)                       |
| Motor neuron disease | Male   | Early Neonatal | 80 plus | Global     | 0         | Improved Water Source (proportion with access) |
| Motor neuron disease | Male   | Early Neonatal | 80 plus | Global     | 0         | LDI (IS per capita)                            |
| Motor neuron disease | Male   | Early Neonatal | 80 plus | Global     | 0         | Sanitation (proportion with access)            |
| Motor neuron disease | Male   | Early Neonatal | 80 plus | Global     | 0         | Sociodemographic Status                        |
| Motor neuron disease | Male   | Early Neonatal | 80 plus | Global     | 1         | Absolute value of average latitude             |
| Motor neuron disease | Male   | Early Neonatal | 80 plus | Global     | 1         | Asbestos production (kg) per capita            |
| Motor neuron disease | Male   | Early Neonatal | 80 plus | Data Rich  | -1        | Health System Access (capped)                  |
| Motor neuron disease | Male   | Early Neonatal | 80 plus | Data Rich  | 0         | Cholesterol (total, mean per capita)           |
| Motor neuron disease | Male   | Early Neonatal | 80 plus | Data Rich  | 0         | Education (years per capita)                   |
| Motor neuron disease | Male   | Early Neonatal | 80 plus | Data Rich  | 0         | Fruits (kcal per capita)                       |
| Motor neuron disease | Male   | Early Neonatal | 80 plus | Data Rich  | 0         | Improved Water Source (proportion with access) |
| Motor neuron disease | Male   | Early Neonatal | 80 plus | Data Rich  | 0         | LDI (IS per capita)                            |
| Motor neuron disease | Male   | Early Neonatal | 80 plus | Data Rich  | 0         | Sanitation (proportion with access)            |
| Motor neuron disease | Male   | Early Neonatal | 80 plus | Data Rich  | 0         | Sociodemographic Status                        |
| Motor neuron disease | Male   | Early Neonatal | 80 plus | Data Rich  | 1         | Absolute value of average latitude             |
| Motor neuron disease | Male   | Early Neonatal | 80 plus | Data Rich  | 1         | Asbestos production (kg) per capita            |
| Motor neuron disease | Female | Early Neonatal | 80 plus | Global     | -1        | Health System Access (capped)                  |
| Motor neuron disease | Female | Early Neonatal | 80 plus | Global     | 0         | Cholesterol (total, mean per capita)           |
| Motor neuron disease | Female | Early Neonatal | 80 plus | Global     | 0         | Education (years per capita)                   |
| Motor neuron disease | Female | Early Neonatal | 80 plus | Global     | 0         | Fruits (kcal per capita)                       |
| Motor neuron disease | Female | Early Neonatal | 80 plus | Global     | 0         | Improved Water Source (proportion with access) |
| Motor neuron disease | Female | Early Neonatal | 80 plus | Global     | 0         | LDI (IS per capita)                            |
| Motor neuron disease | Female | Early Neonatal | 80 plus | Global     | 0         | Sanitation (proportion with access)            |
| Motor neuron disease | Female | Early Neonatal | 80 plus | Global     | 0         | Sociodemographic Status                        |
| Motor neuron disease | Female | Early Neonatal | 80 plus | Global     | 1         | Absolute value of average latitude             |
| Motor neuron disease | Female | Early Neonatal | 80 plus | Global     | 1         | Asbestos production (kg) per capita            |
| Motor neuron disease | Female | Early Neonatal | 80 plus | Data Rich  | -1        | Health System Access (capped)                  |



**Appendix Table 10: CODEm covariates used, level of covariate, and expected direction of covariate by cause, sex, and age**

| Cause                        | Sex    | Age start      | Age end | Model type | Direction | Covariate                                           |
|------------------------------|--------|----------------|---------|------------|-----------|-----------------------------------------------------|
| Motor neuron disease         | Female | Early Neonatal | 80 plus | Data Rich  | 0         | Cholesterol (total, mean per capita)                |
| Motor neuron disease         | Female | Early Neonatal | 80 plus | Data Rich  | 0         | Education (years per capita)                        |
| Motor neuron disease         | Female | Early Neonatal | 80 plus | Data Rich  | 0         | Fruits (kcal per capita)                            |
| Motor neuron disease         | Female | Early Neonatal | 80 plus | Data Rich  | 0         | Improved Water Source (proportion with access)      |
| Motor neuron disease         | Female | Early Neonatal | 80 plus | Data Rich  | 0         | LDI (IS per capita)                                 |
| Motor neuron disease         | Female | Early Neonatal | 80 plus | Data Rich  | 0         | Sanitation (proportion with access)                 |
| Motor neuron disease         | Female | Early Neonatal | 80 plus | Data Rich  | 0         | Sociodemographic Status                             |
| Motor neuron disease         | Female | Early Neonatal | 80 plus | Data Rich  | 1         | Absolute value of average latitude                  |
| Motor neuron disease         | Female | Early Neonatal | 80 plus | Data Rich  | 1         | Asbestos production (kg) per capita                 |
| Other neurological disorders | Male   | Post Neonatal  | 80 plus | Global     | -1        | Education (years per capita)                        |
| Other neurological disorders | Male   | Post Neonatal  | 80 plus | Global     | -1        | Fruits (kcal per capita)                            |
| Other neurological disorders | Male   | Post Neonatal  | 80 plus | Global     | -1        | Health System Access 2 (unitless)                   |
| Other neurological disorders | Male   | Post Neonatal  | 80 plus | Global     | -1        | LDI (IS per capita)                                 |
| Other neurological disorders | Male   | Post Neonatal  | 80 plus | Global     | 0         | Sociodemographic Status                             |
| Other neurological disorders | Male   | Post Neonatal  | 80 plus | Global     | 1         | Alcohol (litres per capita)                         |
| Other neurological disorders | Male   | Post Neonatal  | 80 plus | Global     | 1         | Animal Fats (kcal per capita)                       |
| Other neurological disorders | Male   | Post Neonatal  | 80 plus | Global     | 1         | Cholesterol (total, mean per capita)                |
| Other neurological disorders | Male   | Post Neonatal  | 80 plus | Global     | 1         | Cumulative Cigarettes (10 Years)                    |
| Other neurological disorders | Male   | Post Neonatal  | 80 plus | Global     | 1         | Cumulative Cigarettes (5 Years)                     |
| Other neurological disorders | Male   | Post Neonatal  | 80 plus | Global     | 1         | Malnutrition (proportion <2SD weight for age)       |
| Other neurological disorders | Male   | Post Neonatal  | 80 plus | Global     | 1         | Mean BMI                                            |
| Other neurological disorders | Male   | Post Neonatal  | 80 plus | Global     | 1         | Pig Meat (kg per capita)                            |
| Other neurological disorders | Male   | Post Neonatal  | 80 plus | Global     | 1         | Population Density (over 1000 ppl/sqkm, proportion) |
| Other neurological disorders | Male   | Post Neonatal  | 80 plus | Global     | 1         | Red Meat (kcal per capita)                          |
| Other neurological disorders | Male   | Post Neonatal  | 80 plus | Global     | 1         | Smoking Prevalence                                  |
| Other neurological disorders | Male   | Post Neonatal  | 80 plus | Global     | 1         | Systolic Blood Pressure (mmHg)                      |
| Other neurological disorders | Male   | Post Neonatal  | 80 plus | Data Rich  | -1        | Education (years per capita)                        |
| Other neurological disorders | Male   | Post Neonatal  | 80 plus | Data Rich  | -1        | Fruits (kcal per capita)                            |
| Other neurological disorders | Male   | Post Neonatal  | 80 plus | Data Rich  | -1        | Health System Access 2 (unitless)                   |
| Other neurological disorders | Male   | Post Neonatal  | 80 plus | Data Rich  | -1        | LDI (IS per capita)                                 |
| Other neurological disorders | Male   | Post Neonatal  | 80 plus | Data Rich  | 0         | Sociodemographic Status                             |
| Other neurological disorders | Male   | Post Neonatal  | 80 plus | Data Rich  | 1         | Alcohol (litres per capita)                         |
| Other neurological disorders | Male   | Post Neonatal  | 80 plus | Data Rich  | 1         | Animal Fats (kcal per capita)                       |
| Other neurological disorders | Male   | Post Neonatal  | 80 plus | Data Rich  | 1         | Cholesterol (total, mean per capita)                |
| Other neurological disorders | Male   | Post Neonatal  | 80 plus | Data Rich  | 1         | Cumulative Cigarettes (10 Years)                    |
| Other neurological disorders | Male   | Post Neonatal  | 80 plus | Data Rich  | 1         | Cumulative Cigarettes (5 Years)                     |
| Other neurological disorders | Male   | Post Neonatal  | 80 plus | Data Rich  | 1         | Malnutrition (proportion <2SD weight for age)       |
| Other neurological disorders | Male   | Post Neonatal  | 80 plus | Data Rich  | 1         | Mean BMI                                            |
| Other neurological disorders | Male   | Post Neonatal  | 80 plus | Data Rich  | 1         | Pig Meat (kg per capita)                            |
| Other neurological disorders | Male   | Post Neonatal  | 80 plus | Data Rich  | 1         | Population Density (over 1000 ppl/sqkm, proportion) |
| Other neurological disorders | Male   | Post Neonatal  | 80 plus | Data Rich  | 1         | Red Meat (kcal per capita)                          |
| Other neurological disorders | Male   | Post Neonatal  | 80 plus | Data Rich  | 1         | Smoking Prevalence                                  |
| Other neurological disorders | Male   | Post Neonatal  | 80 plus | Data Rich  | 1         | Systolic Blood Pressure (mmHg)                      |
| Other neurological disorders | Female | Post Neonatal  | 80 plus | Global     | -1        | Education (years per capita)                        |

**Appendix Table 10: CODEm covariates used, level of covariate, and expected direction of covariate by cause, sex, and age**

| Cause                        | Sex    | Age start     | Age end | Model type | Direction | Covariate                                           |
|------------------------------|--------|---------------|---------|------------|-----------|-----------------------------------------------------|
| Other neurological disorders | Female | Post Neonatal | 80 plus | Global     | -1        | Fruits (kcal per capita)                            |
| Other neurological disorders | Female | Post Neonatal | 80 plus | Global     | -1        | Health System Access 2 (unitless)                   |
| Other neurological disorders | Female | Post Neonatal | 80 plus | Global     | -1        | LDI (IS per capita)                                 |
| Other neurological disorders | Female | Post Neonatal | 80 plus | Global     | 0         | Sociodemographic Status                             |
| Other neurological disorders | Female | Post Neonatal | 80 plus | Global     | 1         | Alcohol (litres per capita)                         |
| Other neurological disorders | Female | Post Neonatal | 80 plus | Global     | 1         | Animal Fats (kcal per capita)                       |
| Other neurological disorders | Female | Post Neonatal | 80 plus | Global     | 1         | Cholesterol (total, mean per capita)                |
| Other neurological disorders | Female | Post Neonatal | 80 plus | Global     | 1         | Cumulative Cigarettes (10 Years)                    |
| Other neurological disorders | Female | Post Neonatal | 80 plus | Global     | 1         | Cumulative Cigarettes (5 Years)                     |
| Other neurological disorders | Female | Post Neonatal | 80 plus | Global     | 1         | Malnutrition (proportion <2SD weight for age)       |
| Other neurological disorders | Female | Post Neonatal | 80 plus | Global     | 1         | Mean BMI                                            |
| Other neurological disorders | Female | Post Neonatal | 80 plus | Global     | 1         | Pig Meat (kg per capita)                            |
| Other neurological disorders | Female | Post Neonatal | 80 plus | Global     | 1         | Population Density (over 1000 ppl/sqkm, proportion) |
| Other neurological disorders | Female | Post Neonatal | 80 plus | Global     | 1         | Red Meat (kcal per capita)                          |
| Other neurological disorders | Female | Post Neonatal | 80 plus | Global     | 1         | Smoking Prevalence                                  |
| Other neurological disorders | Female | Post Neonatal | 80 plus | Global     | 1         | Systolic Blood Pressure (mmHg)                      |
| Other neurological disorders | Female | Post Neonatal | 80 plus | Data Rich  | -1        | Education (years per capita)                        |
| Other neurological disorders | Female | Post Neonatal | 80 plus | Data Rich  | -1        | Fruits (kcal per capita)                            |
| Other neurological disorders | Female | Post Neonatal | 80 plus | Data Rich  | -1        | Health System Access 2 (unitless)                   |
| Other neurological disorders | Female | Post Neonatal | 80 plus | Data Rich  | -1        | LDI (IS per capita)                                 |
| Other neurological disorders | Female | Post Neonatal | 80 plus | Data Rich  | 0         | Sociodemographic Status                             |
| Other neurological disorders | Female | Post Neonatal | 80 plus | Data Rich  | 1         | Alcohol (litres per capita)                         |
| Other neurological disorders | Female | Post Neonatal | 80 plus | Data Rich  | 1         | Animal Fats (kcal per capita)                       |
| Other neurological disorders | Female | Post Neonatal | 80 plus | Data Rich  | 1         | Cholesterol (total, mean per capita)                |
| Other neurological disorders | Female | Post Neonatal | 80 plus | Data Rich  | 1         | Cumulative Cigarettes (10 Years)                    |
| Other neurological disorders | Female | Post Neonatal | 80 plus | Data Rich  | 1         | Cumulative Cigarettes (5 Years)                     |
| Other neurological disorders | Female | Post Neonatal | 80 plus | Data Rich  | 1         | Malnutrition (proportion <2SD weight for age)       |
| Other neurological disorders | Female | Post Neonatal | 80 plus | Data Rich  | 1         | Mean BMI                                            |
| Other neurological disorders | Female | Post Neonatal | 80 plus | Data Rich  | 1         | Pig Meat (kg per capita)                            |
| Other neurological disorders | Female | Post Neonatal | 80 plus | Data Rich  | 1         | Population Density (over 1000 ppl/sqkm, proportion) |
| Other neurological disorders | Female | Post Neonatal | 80 plus | Data Rich  | 1         | Red Meat (kcal per capita)                          |
| Other neurological disorders | Female | Post Neonatal | 80 plus | Data Rich  | 1         | Smoking Prevalence                                  |
| Other neurological disorders | Female | Post Neonatal | 80 plus | Data Rich  | 1         | Systolic Blood Pressure (mmHg)                      |
| Schizophrenia                | Male   | 25 to 29      | 80 plus | Global     | 0         | Alcohol (litres per capita)                         |
| Schizophrenia                | Male   | 25 to 29      | 80 plus | Global     | 0         | Cumulative Cigarettes (20 Years)                    |
| Schizophrenia                | Male   | 25 to 29      | 80 plus | Global     | 0         | Education (years per capita)                        |
| Schizophrenia                | Male   | 25 to 29      | 80 plus | Global     | 0         | Health System Access 2 (unitless)                   |
| Schizophrenia                | Male   | 25 to 29      | 80 plus | Global     | 0         | LDI (IS per capita)                                 |
| Schizophrenia                | Male   | 25 to 29      | 80 plus | Global     | 0         | Smoking Prevalence                                  |
| Schizophrenia                | Male   | 25 to 29      | 80 plus | Global     | 0         | Sociodemographic Status                             |
| Schizophrenia                | Male   | 25 to 29      | 80 plus | Global     | 1         | Malnutrition (proportion <2SD weight for age)       |
| Schizophrenia                | Male   | 25 to 29      | 80 plus | Data Rich  | 0         | Alcohol (litres per capita)                         |
| Schizophrenia                | Male   | 25 to 29      | 80 plus | Data Rich  | 0         | Cumulative Cigarettes (20 Years)                    |
| Schizophrenia                | Male   | 25 to 29      | 80 plus | Data Rich  | 0         | Education (years per capita)                        |

**Appendix Table 10: CODEm covariates used, level of covariate, and expected direction of covariate by cause, sex, and age**

| Cause                 | Sex    | Age start | Age end | Model type | Direction | Covariate                                     |
|-----------------------|--------|-----------|---------|------------|-----------|-----------------------------------------------|
| Schizophrenia         | Male   | 25 to 29  | 80 plus | Data Rich  | 0         | Health System Access 2 (unitless)             |
| Schizophrenia         | Male   | 25 to 29  | 80 plus | Data Rich  | 0         | LDI (IS per capita)                           |
| Schizophrenia         | Male   | 25 to 29  | 80 plus | Data Rich  | 0         | Smoking Prevalence                            |
| Schizophrenia         | Male   | 25 to 29  | 80 plus | Data Rich  | 0         | Sociodemographic Status                       |
| Schizophrenia         | Male   | 25 to 29  | 80 plus | Data Rich  | 1         | Malnutrition (proportion <2SD weight for age) |
| Schizophrenia         | Female | 25 to 29  | 80 plus | Global     | 0         | Alcohol (litres per capita)                   |
| Schizophrenia         | Female | 25 to 29  | 80 plus | Global     | 0         | Cumulative Cigarettes (20 Years)              |
| Schizophrenia         | Female | 25 to 29  | 80 plus | Global     | 0         | Education (years per capita)                  |
| Schizophrenia         | Female | 25 to 29  | 80 plus | Global     | 0         | Health System Access 2 (unitless)             |
| Schizophrenia         | Female | 25 to 29  | 80 plus | Global     | 0         | LDI (IS per capita)                           |
| Schizophrenia         | Female | 25 to 29  | 80 plus | Global     | 0         | Smoking Prevalence                            |
| Schizophrenia         | Female | 25 to 29  | 80 plus | Global     | 0         | Sociodemographic Status                       |
| Schizophrenia         | Female | 25 to 29  | 80 plus | Global     | 1         | Malnutrition (proportion <2SD weight for age) |
| Schizophrenia         | Female | 25 to 29  | 80 plus | Data Rich  | 0         | Alcohol (litres per capita)                   |
| Schizophrenia         | Female | 25 to 29  | 80 plus | Data Rich  | 0         | Cumulative Cigarettes (20 Years)              |
| Schizophrenia         | Female | 25 to 29  | 80 plus | Data Rich  | 0         | Education (years per capita)                  |
| Schizophrenia         | Female | 25 to 29  | 80 plus | Data Rich  | 0         | Health System Access 2 (unitless)             |
| Schizophrenia         | Female | 25 to 29  | 80 plus | Data Rich  | 0         | LDI (IS per capita)                           |
| Schizophrenia         | Female | 25 to 29  | 80 plus | Data Rich  | 0         | Smoking Prevalence                            |
| Schizophrenia         | Female | 25 to 29  | 80 plus | Data Rich  | 0         | Sociodemographic Status                       |
| Schizophrenia         | Female | 25 to 29  | 80 plus | Data Rich  | 1         | Malnutrition (proportion <2SD weight for age) |
| Alcohol use disorders | Male   | 15 to 19  | 80 plus | Global     | -1        | Education (years per capita)                  |
| Alcohol use disorders | Male   | 15 to 19  | 80 plus | Global     | -1        | Health System Access 2 (unitless)             |
| Alcohol use disorders | Male   | 15 to 19  | 80 plus | Global     | -1        | LDI (IS per capita)                           |
| Alcohol use disorders | Male   | 15 to 19  | 80 plus | Global     | -1        | Religion (binary, >50% Muslim)                |
| Alcohol use disorders | Male   | 15 to 19  | 80 plus | Global     | 0         | Cumulative Cigarettes (10 Years)              |
| Alcohol use disorders | Male   | 15 to 19  | 80 plus | Global     | 0         | Smoking Prevalence                            |
| Alcohol use disorders | Male   | 15 to 19  | 80 plus | Global     | 0         | Sociodemographic Status                       |
| Alcohol use disorders | Male   | 15 to 19  | 80 plus | Global     | 1         | Alcohol (litres per capita)                   |
| Alcohol use disorders | Male   | 15 to 19  | 80 plus | Global     | 1         | Prevalence of binge drinking                  |
| Alcohol use disorders | Male   | 15 to 19  | 80 plus | Data Rich  | -1        | Education (years per capita)                  |
| Alcohol use disorders | Male   | 15 to 19  | 80 plus | Data Rich  | -1        | Health System Access 2 (unitless)             |
| Alcohol use disorders | Male   | 15 to 19  | 80 plus | Data Rich  | -1        | LDI (IS per capita)                           |
| Alcohol use disorders | Male   | 15 to 19  | 80 plus | Data Rich  | -1        | Religion (binary, >50% Muslim)                |
| Alcohol use disorders | Male   | 15 to 19  | 80 plus | Data Rich  | 0         | Cumulative Cigarettes (10 Years)              |
| Alcohol use disorders | Male   | 15 to 19  | 80 plus | Data Rich  | 0         | Smoking Prevalence                            |
| Alcohol use disorders | Male   | 15 to 19  | 80 plus | Data Rich  | 0         | Sociodemographic Status                       |
| Alcohol use disorders | Male   | 15 to 19  | 80 plus | Data Rich  | 1         | Alcohol (litres per capita)                   |
| Alcohol use disorders | Male   | 15 to 19  | 80 plus | Data Rich  | 1         | Prevalence of binge drinking                  |
| Alcohol use disorders | Female | 15 to 19  | 80 plus | Global     | -1        | Education (years per capita)                  |
| Alcohol use disorders | Female | 15 to 19  | 80 plus | Global     | -1        | Health System Access 2 (unitless)             |
| Alcohol use disorders | Female | 15 to 19  | 80 plus | Global     | -1        | LDI (IS per capita)                           |
| Alcohol use disorders | Female | 15 to 19  | 80 plus | Global     | -1        | Religion (binary, >50% Muslim)                |
| Alcohol use disorders | Female | 15 to 19  | 80 plus | Global     | 0         | Cumulative Cigarettes (10 Years)              |

**Appendix Table 10: CODEm covariates used, level of covariate, and expected direction of covariate by cause, sex, and age**

| Cause                 | Sex    | Age start      | Age end       | Model type | Direction | Covariate                         |
|-----------------------|--------|----------------|---------------|------------|-----------|-----------------------------------|
| Alcohol use disorders | Female | 15 to 19       | 80 plus       | Global     | 0         | Smoking Prevalence                |
| Alcohol use disorders | Female | 15 to 19       | 80 plus       | Global     | 0         | Sociodemographic Status           |
| Alcohol use disorders | Female | 15 to 19       | 80 plus       | Global     | 1         | Alcohol (litres per capita)       |
| Alcohol use disorders | Female | 15 to 19       | 80 plus       | Global     | 1         | Prevalence of binge drinking      |
| Alcohol use disorders | Female | 15 to 19       | 80 plus       | Data Rich  | -1        | Education (years per capita)      |
| Alcohol use disorders | Female | 15 to 19       | 80 plus       | Data Rich  | -1        | Health System Access 2 (unitless) |
| Alcohol use disorders | Female | 15 to 19       | 80 plus       | Data Rich  | -1        | LDI (IS per capita)               |
| Alcohol use disorders | Female | 15 to 19       | 80 plus       | Data Rich  | -1        | Religion (binary, >50% Muslim)    |
| Alcohol use disorders | Female | 15 to 19       | 80 plus       | Data Rich  | 0         | Cumulative Cigarettes (10 Years)  |
| Alcohol use disorders | Female | 15 to 19       | 80 plus       | Data Rich  | 0         | Smoking Prevalence                |
| Alcohol use disorders | Female | 15 to 19       | 80 plus       | Data Rich  | 0         | Sociodemographic Status           |
| Alcohol use disorders | Female | 15 to 19       | 80 plus       | Data Rich  | 1         | Alcohol (litres per capita)       |
| Alcohol use disorders | Female | 15 to 19       | 80 plus       | Data Rich  | 1         | Prevalence of binge drinking      |
| Drug use disorders    | Male   | 15 to 19       | 80 plus       | Global     | 0         | Education (years per capita)      |
| Drug use disorders    | Male   | Early Neonatal | Late Neonatal | Global     | 0         | Education (years per capita)      |
| Drug use disorders    | Male   | 15 to 19       | 80 plus       | Global     | 0         | Health System Access 2 (unitless) |
| Drug use disorders    | Male   | Early Neonatal | Late Neonatal | Global     | 0         | Health System Access 2 (unitless) |
| Drug use disorders    | Male   | 15 to 19       | 80 plus       | Global     | 0         | LDI (IS per capita)               |
| Drug use disorders    | Male   | Early Neonatal | Late Neonatal | Global     | 0         | LDI (IS per capita)               |
| Drug use disorders    | Male   | 15 to 19       | 80 plus       | Global     | 0         | Sociodemographic Status           |
| Drug use disorders    | Male   | Early Neonatal | Late Neonatal | Global     | 0         | Sociodemographic Status           |
| Drug use disorders    | Male   | 15 to 19       | 80 plus       | Global     | 1         | Alcohol (litres per capita)       |
| Drug use disorders    | Male   | Early Neonatal | Late Neonatal | Global     | 1         | Alcohol (litres per capita)       |
| Drug use disorders    | Male   | 15 to 19       | 80 plus       | Global     | 1         | Cumulative Cigarettes (10 Years)  |
| Drug use disorders    | Male   | Early Neonatal | Late Neonatal | Global     | 1         | Cumulative Cigarettes (10 Years)  |
| Drug use disorders    | Male   | 15 to 19       | 80 plus       | Global     | 1         | Cumulative Cigarettes (5 Years)   |
| Drug use disorders    | Male   | Early Neonatal | Late Neonatal | Global     | 1         | Cumulative Cigarettes (5 Years)   |
| Drug use disorders    | Male   | 15 to 19       | 80 plus       | Global     | 1         | Opium Cultivation (binary)        |
| Drug use disorders    | Male   | Early Neonatal | Late Neonatal | Global     | 1         | Opium Cultivation (binary)        |
| Drug use disorders    | Male   | 15 to 19       | 80 plus       | Global     | 1         | Smoking Prevalence                |
| Drug use disorders    | Male   | Early Neonatal | Late Neonatal | Global     | 1         | Smoking Prevalence                |
| Drug use disorders    | Male   | 15 to 19       | 80 plus       | Data Rich  | 0         | Education (years per capita)      |
| Drug use disorders    | Male   | Early Neonatal | Late Neonatal | Data Rich  | 0         | Education (years per capita)      |
| Drug use disorders    | Male   | 15 to 19       | 80 plus       | Data Rich  | 0         | Health System Access 2 (unitless) |
| Drug use disorders    | Male   | Early Neonatal | Late Neonatal | Data Rich  | 0         | Health System Access 2 (unitless) |
| Drug use disorders    | Male   | 15 to 19       | 80 plus       | Data Rich  | 0         | LDI (IS per capita)               |
| Drug use disorders    | Male   | Early Neonatal | Late Neonatal | Data Rich  | 0         | LDI (IS per capita)               |
| Drug use disorders    | Male   | 15 to 19       | 80 plus       | Data Rich  | 0         | Sociodemographic Status           |
| Drug use disorders    | Male   | Early Neonatal | Late Neonatal | Data Rich  | 0         | Sociodemographic Status           |
| Drug use disorders    | Male   | 15 to 19       | 80 plus       | Data Rich  | 1         | Alcohol (litres per capita)       |
| Drug use disorders    | Male   | Early Neonatal | Late Neonatal | Data Rich  | 1         | Alcohol (litres per capita)       |
| Drug use disorders    | Male   | 15 to 19       | 80 plus       | Data Rich  | 1         | Cumulative Cigarettes (10 Years)  |
| Drug use disorders    | Male   | Early Neonatal | Late Neonatal | Data Rich  | 1         | Cumulative Cigarettes (10 Years)  |
| Drug use disorders    | Male   | 15 to 19       | 80 plus       | Data Rich  | 1         | Cumulative Cigarettes (5 Years)   |

**Appendix Table 10: CODEm covariates used, level of covariate, and expected direction of covariate by cause, sex, and age**

| Cause                | Sex    | Age start      | Age end       | Model type | Direction | Covariate                         |
|----------------------|--------|----------------|---------------|------------|-----------|-----------------------------------|
| Drug use disorders   | Male   | Early Neonatal | Late Neonatal | Data Rich  | 1         | Cumulative Cigarettes (5 Years)   |
| Drug use disorders   | Male   | 15 to 19       | 80 plus       | Data Rich  | 1         | Opium Cultivation (binary)        |
| Drug use disorders   | Male   | Early Neonatal | Late Neonatal | Data Rich  | 1         | Opium Cultivation (binary)        |
| Drug use disorders   | Male   | 15 to 19       | 80 plus       | Data Rich  | 1         | Smoking Prevalence                |
| Drug use disorders   | Male   | Early Neonatal | Late Neonatal | Data Rich  | 1         | Smoking Prevalence                |
| Drug use disorders   | Female | 15 to 19       | 80 plus       | Global     | 0         | Education (years per capita)      |
| Drug use disorders   | Female | Early Neonatal | Late Neonatal | Global     | 0         | Education (years per capita)      |
| Drug use disorders   | Female | 15 to 19       | 80 plus       | Global     | 0         | Health System Access 2 (unitless) |
| Drug use disorders   | Female | Early Neonatal | Late Neonatal | Global     | 0         | Health System Access 2 (unitless) |
| Drug use disorders   | Female | 15 to 19       | 80 plus       | Global     | 0         | LDI (IS per capita)               |
| Drug use disorders   | Female | Early Neonatal | Late Neonatal | Global     | 0         | LDI (IS per capita)               |
| Drug use disorders   | Female | 15 to 19       | 80 plus       | Global     | 0         | Sociodemographic Status           |
| Drug use disorders   | Female | Early Neonatal | Late Neonatal | Global     | 0         | Sociodemographic Status           |
| Drug use disorders   | Female | 15 to 19       | 80 plus       | Global     | 1         | Alcohol (litres per capita)       |
| Drug use disorders   | Female | Early Neonatal | Late Neonatal | Global     | 1         | Alcohol (litres per capita)       |
| Drug use disorders   | Female | 15 to 19       | 80 plus       | Global     | 1         | Cumulative Cigarettes (10 Years)  |
| Drug use disorders   | Female | Early Neonatal | Late Neonatal | Global     | 1         | Cumulative Cigarettes (10 Years)  |
| Drug use disorders   | Female | 15 to 19       | 80 plus       | Global     | 1         | Cumulative Cigarettes (5 Years)   |
| Drug use disorders   | Female | Early Neonatal | Late Neonatal | Global     | 1         | Cumulative Cigarettes (5 Years)   |
| Drug use disorders   | Female | 15 to 19       | 80 plus       | Global     | 1         | Opium Cultivation (binary)        |
| Drug use disorders   | Female | Early Neonatal | Late Neonatal | Global     | 1         | Opium Cultivation (binary)        |
| Drug use disorders   | Female | 15 to 19       | 80 plus       | Global     | 1         | Smoking Prevalence                |
| Drug use disorders   | Female | Early Neonatal | Late Neonatal | Global     | 1         | Smoking Prevalence                |
| Drug use disorders   | Female | 15 to 19       | 80 plus       | Data Rich  | 0         | Education (years per capita)      |
| Drug use disorders   | Female | Early Neonatal | Late Neonatal | Data Rich  | 0         | Education (years per capita)      |
| Drug use disorders   | Female | 15 to 19       | 80 plus       | Data Rich  | 0         | Health System Access 2 (unitless) |
| Drug use disorders   | Female | Early Neonatal | Late Neonatal | Data Rich  | 0         | Health System Access 2 (unitless) |
| Drug use disorders   | Female | 15 to 19       | 80 plus       | Data Rich  | 0         | LDI (IS per capita)               |
| Drug use disorders   | Female | Early Neonatal | Late Neonatal | Data Rich  | 0         | LDI (IS per capita)               |
| Drug use disorders   | Female | 15 to 19       | 80 plus       | Data Rich  | 0         | Sociodemographic Status           |
| Drug use disorders   | Female | Early Neonatal | Late Neonatal | Data Rich  | 0         | Sociodemographic Status           |
| Drug use disorders   | Female | 15 to 19       | 80 plus       | Data Rich  | 1         | Alcohol (litres per capita)       |
| Drug use disorders   | Female | Early Neonatal | Late Neonatal | Data Rich  | 1         | Alcohol (litres per capita)       |
| Drug use disorders   | Female | 15 to 19       | 80 plus       | Data Rich  | 1         | Cumulative Cigarettes (10 Years)  |
| Drug use disorders   | Female | Early Neonatal | Late Neonatal | Data Rich  | 1         | Cumulative Cigarettes (10 Years)  |
| Drug use disorders   | Female | 15 to 19       | 80 plus       | Data Rich  | 1         | Cumulative Cigarettes (5 Years)   |
| Drug use disorders   | Female | Early Neonatal | Late Neonatal | Data Rich  | 1         | Cumulative Cigarettes (5 Years)   |
| Drug use disorders   | Female | 15 to 19       | 80 plus       | Data Rich  | 1         | Opium Cultivation (binary)        |
| Drug use disorders   | Female | Early Neonatal | Late Neonatal | Data Rich  | 1         | Opium Cultivation (binary)        |
| Drug use disorders   | Female | 15 to 19       | 80 plus       | Data Rich  | 1         | Smoking Prevalence                |
| Drug use disorders   | Female | Early Neonatal | Late Neonatal | Data Rich  | 1         | Smoking Prevalence                |
| Opioid use disorders | Male   | 15 to 19       | 80 plus       | Global     | 0         | Education (years per capita)      |
| Opioid use disorders | Male   | Early Neonatal | Late Neonatal | Global     | 0         | Education (years per capita)      |
| Opioid use disorders | Male   | 15 to 19       | 80 plus       | Global     | 0         | Health System Access 2 (unitless) |

**Appendix Table 10: CODEm covariates used, level of covariate, and expected direction of covariate by cause, sex, and age**

| Cause                | Sex    | Age start      | Age end       | Model type | Direction | Covariate                         |
|----------------------|--------|----------------|---------------|------------|-----------|-----------------------------------|
| Opioid use disorders | Male   | Early Neonatal | Late Neonatal | Global     | 0         | Health System Access 2 (unitless) |
| Opioid use disorders | Male   | 15 to 19       | 80 plus       | Global     | 0         | LDI (IS per capita)               |
| Opioid use disorders | Male   | Early Neonatal | Late Neonatal | Global     | 0         | LDI (IS per capita)               |
| Opioid use disorders | Male   | 15 to 19       | 80 plus       | Global     | 0         | Sociodemographic Status           |
| Opioid use disorders | Male   | Early Neonatal | Late Neonatal | Global     | 0         | Sociodemographic Status           |
| Opioid use disorders | Male   | 15 to 19       | 80 plus       | Global     | 1         | Alcohol (litres per capita)       |
| Opioid use disorders | Male   | Early Neonatal | Late Neonatal | Global     | 1         | Alcohol (litres per capita)       |
| Opioid use disorders | Male   | 15 to 19       | 80 plus       | Global     | 1         | Cumulative Cigarettes (10 Years)  |
| Opioid use disorders | Male   | Early Neonatal | Late Neonatal | Global     | 1         | Cumulative Cigarettes (10 Years)  |
| Opioid use disorders | Male   | 15 to 19       | 80 plus       | Global     | 1         | Cumulative Cigarettes (5 Years)   |
| Opioid use disorders | Male   | Early Neonatal | Late Neonatal | Global     | 1         | Cumulative Cigarettes (5 Years)   |
| Opioid use disorders | Male   | 15 to 19       | 80 plus       | Global     | 1         | Opium Cultivation (binary)        |
| Opioid use disorders | Male   | Early Neonatal | Late Neonatal | Global     | 1         | Opium Cultivation (binary)        |
| Opioid use disorders | Male   | 15 to 19       | 80 plus       | Global     | 1         | Smoking Prevalence                |
| Opioid use disorders | Male   | Early Neonatal | Late Neonatal | Global     | 1         | Smoking Prevalence                |
| Opioid use disorders | Male   | 15 to 19       | 80 plus       | Data Rich  | 0         | Education (years per capita)      |
| Opioid use disorders | Male   | Early Neonatal | Late Neonatal | Data Rich  | 0         | Education (years per capita)      |
| Opioid use disorders | Male   | 15 to 19       | 80 plus       | Data Rich  | 0         | Health System Access 2 (unitless) |
| Opioid use disorders | Male   | Early Neonatal | Late Neonatal | Data Rich  | 0         | Health System Access 2 (unitless) |
| Opioid use disorders | Male   | 15 to 19       | 80 plus       | Data Rich  | 0         | LDI (IS per capita)               |
| Opioid use disorders | Male   | Early Neonatal | Late Neonatal | Data Rich  | 0         | LDI (IS per capita)               |
| Opioid use disorders | Male   | 15 to 19       | 80 plus       | Data Rich  | 0         | Sociodemographic Status           |
| Opioid use disorders | Male   | Early Neonatal | Late Neonatal | Data Rich  | 0         | Sociodemographic Status           |
| Opioid use disorders | Male   | 15 to 19       | 80 plus       | Data Rich  | 1         | Alcohol (litres per capita)       |
| Opioid use disorders | Male   | Early Neonatal | Late Neonatal | Data Rich  | 1         | Alcohol (litres per capita)       |
| Opioid use disorders | Male   | 15 to 19       | 80 plus       | Data Rich  | 1         | Cumulative Cigarettes (10 Years)  |
| Opioid use disorders | Male   | Early Neonatal | Late Neonatal | Data Rich  | 1         | Cumulative Cigarettes (10 Years)  |
| Opioid use disorders | Male   | 15 to 19       | 80 plus       | Data Rich  | 1         | Cumulative Cigarettes (5 Years)   |
| Opioid use disorders | Male   | Early Neonatal | Late Neonatal | Data Rich  | 1         | Cumulative Cigarettes (5 Years)   |
| Opioid use disorders | Male   | 15 to 19       | 80 plus       | Data Rich  | 1         | Opium Cultivation (binary)        |
| Opioid use disorders | Male   | Early Neonatal | Late Neonatal | Data Rich  | 1         | Opium Cultivation (binary)        |
| Opioid use disorders | Male   | 15 to 19       | 80 plus       | Data Rich  | 1         | Smoking Prevalence                |
| Opioid use disorders | Male   | Early Neonatal | Late Neonatal | Data Rich  | 1         | Smoking Prevalence                |
| Opioid use disorders | Female | 15 to 19       | 80 plus       | Global     | 0         | Education (years per capita)      |
| Opioid use disorders | Female | Early Neonatal | Late Neonatal | Global     | 0         | Education (years per capita)      |
| Opioid use disorders | Female | 15 to 19       | 80 plus       | Global     | 0         | Health System Access 2 (unitless) |
| Opioid use disorders | Female | Early Neonatal | Late Neonatal | Global     | 0         | Health System Access 2 (unitless) |
| Opioid use disorders | Female | 15 to 19       | 80 plus       | Global     | 0         | LDI (IS per capita)               |
| Opioid use disorders | Female | Early Neonatal | Late Neonatal | Global     | 0         | LDI (IS per capita)               |
| Opioid use disorders | Female | 15 to 19       | 80 plus       | Global     | 0         | Sociodemographic Status           |
| Opioid use disorders | Female | Early Neonatal | Late Neonatal | Global     | 0         | Sociodemographic Status           |
| Opioid use disorders | Female | 15 to 19       | 80 plus       | Global     | 1         | Alcohol (litres per capita)       |
| Opioid use disorders | Female | Early Neonatal | Late Neonatal | Global     | 1         | Alcohol (litres per capita)       |
| Opioid use disorders | Female | 15 to 19       | 80 plus       | Global     | 1         | Cumulative Cigarettes (10 Years)  |

**Appendix Table 10: CODEm covariates used, level of covariate, and expected direction of covariate by cause, sex, and age**

| Cause                 | Sex    | Age start      | Age end       | Model type | Direction | Covariate                         |
|-----------------------|--------|----------------|---------------|------------|-----------|-----------------------------------|
| Opioid use disorders  | Female | Early Neonatal | Late Neonatal | Global     | 1         | Cumulative Cigarettes (10 Years)  |
| Opioid use disorders  | Female | 15 to 19       | 80 plus       | Global     | 1         | Cumulative Cigarettes (5 Years)   |
| Opioid use disorders  | Female | Early Neonatal | Late Neonatal | Global     | 1         | Cumulative Cigarettes (5 Years)   |
| Opioid use disorders  | Female | 15 to 19       | 80 plus       | Global     | 1         | Opium Cultivation (binary)        |
| Opioid use disorders  | Female | Early Neonatal | Late Neonatal | Global     | 1         | Opium Cultivation (binary)        |
| Opioid use disorders  | Female | 15 to 19       | 80 plus       | Global     | 1         | Smoking Prevalence                |
| Opioid use disorders  | Female | Early Neonatal | Late Neonatal | Global     | 1         | Smoking Prevalence                |
| Opioid use disorders  | Female | 15 to 19       | 80 plus       | Data Rich  | 0         | Education (years per capita)      |
| Opioid use disorders  | Female | Early Neonatal | Late Neonatal | Data Rich  | 0         | Education (years per capita)      |
| Opioid use disorders  | Female | 15 to 19       | 80 plus       | Data Rich  | 0         | Health System Access 2 (unitless) |
| Opioid use disorders  | Female | Early Neonatal | Late Neonatal | Data Rich  | 0         | Health System Access 2 (unitless) |
| Opioid use disorders  | Female | 15 to 19       | 80 plus       | Data Rich  | 0         | LDI (IS per capita)               |
| Opioid use disorders  | Female | Early Neonatal | Late Neonatal | Data Rich  | 0         | LDI (IS per capita)               |
| Opioid use disorders  | Female | 15 to 19       | 80 plus       | Data Rich  | 0         | Sociodemographic Status           |
| Opioid use disorders  | Female | Early Neonatal | Late Neonatal | Data Rich  | 0         | Sociodemographic Status           |
| Opioid use disorders  | Female | 15 to 19       | 80 plus       | Data Rich  | 1         | Alcohol (litres per capita)       |
| Opioid use disorders  | Female | Early Neonatal | Late Neonatal | Data Rich  | 1         | Alcohol (litres per capita)       |
| Opioid use disorders  | Female | 15 to 19       | 80 plus       | Data Rich  | 1         | Cumulative Cigarettes (10 Years)  |
| Opioid use disorders  | Female | Early Neonatal | Late Neonatal | Data Rich  | 1         | Cumulative Cigarettes (10 Years)  |
| Opioid use disorders  | Female | 15 to 19       | 80 plus       | Data Rich  | 1         | Cumulative Cigarettes (5 Years)   |
| Opioid use disorders  | Female | Early Neonatal | Late Neonatal | Data Rich  | 1         | Cumulative Cigarettes (5 Years)   |
| Opioid use disorders  | Female | 15 to 19       | 80 plus       | Data Rich  | 1         | Opium Cultivation (binary)        |
| Opioid use disorders  | Female | Early Neonatal | Late Neonatal | Data Rich  | 1         | Opium Cultivation (binary)        |
| Opioid use disorders  | Female | 15 to 19       | 80 plus       | Data Rich  | 1         | Smoking Prevalence                |
| Opioid use disorders  | Female | Early Neonatal | Late Neonatal | Data Rich  | 1         | Smoking Prevalence                |
| Cocaine use disorders | Male   | 15 to 19       | 80 plus       | Global     | 0         | Education (years per capita)      |
| Cocaine use disorders | Male   | 15 to 19       | 80 plus       | Global     | 0         | LDI (IS per capita)               |
| Cocaine use disorders | Male   | 15 to 19       | 80 plus       | Global     | 1         | Alcohol (litres per capita)       |
| Cocaine use disorders | Male   | 15 to 19       | 80 plus       | Global     | 1         | Cumulative Cigarettes (10 Years)  |
| Cocaine use disorders | Male   | 15 to 19       | 80 plus       | Global     | 1         | Cumulative Cigarettes (5 Years)   |
| Cocaine use disorders | Male   | 15 to 19       | 80 plus       | Global     | 1         | Health System Access 2 (unitless) |
| Cocaine use disorders | Male   | 15 to 19       | 80 plus       | Global     | 1         | Smoking Prevalence                |
| Cocaine use disorders | Male   | 15 to 19       | 80 plus       | Global     | 1         | Sociodemographic Status           |
| Cocaine use disorders | Male   | 15 to 19       | 80 plus       | Data Rich  | 0         | Education (years per capita)      |
| Cocaine use disorders | Male   | 15 to 19       | 80 plus       | Data Rich  | 0         | LDI (IS per capita)               |
| Cocaine use disorders | Male   | 15 to 19       | 80 plus       | Data Rich  | 1         | Alcohol (litres per capita)       |
| Cocaine use disorders | Male   | 15 to 19       | 80 plus       | Data Rich  | 1         | Cumulative Cigarettes (10 Years)  |
| Cocaine use disorders | Male   | 15 to 19       | 80 plus       | Data Rich  | 1         | Cumulative Cigarettes (5 Years)   |
| Cocaine use disorders | Male   | 15 to 19       | 80 plus       | Data Rich  | 1         | Health System Access 2 (unitless) |
| Cocaine use disorders | Male   | 15 to 19       | 80 plus       | Data Rich  | 1         | Smoking Prevalence                |
| Cocaine use disorders | Male   | 15 to 19       | 80 plus       | Data Rich  | 1         | Sociodemographic Status           |
| Cocaine use disorders | Female | 15 to 19       | 80 plus       | Global     | 0         | Education (years per capita)      |
| Cocaine use disorders | Female | 15 to 19       | 80 plus       | Global     | 0         | LDI (IS per capita)               |
| Cocaine use disorders | Female | 15 to 19       | 80 plus       | Global     | 1         | Alcohol (litres per capita)       |

**Appendix Table 10: CODEm covariates used, level of covariate, and expected direction of covariate by cause, sex, and age**

| Cause                     | Sex    | Age start | Age end | Model type | Direction | Covariate                         |
|---------------------------|--------|-----------|---------|------------|-----------|-----------------------------------|
| Cocaine use disorders     | Female | 15 to 19  | 80 plus | Global     | 1         | Cumulative Cigarettes (10 Years)  |
| Cocaine use disorders     | Female | 15 to 19  | 80 plus | Global     | 1         | Cumulative Cigarettes (5 Years)   |
| Cocaine use disorders     | Female | 15 to 19  | 80 plus | Global     | 1         | Health System Access 2 (unitless) |
| Cocaine use disorders     | Female | 15 to 19  | 80 plus | Global     | 1         | Smoking Prevalence                |
| Cocaine use disorders     | Female | 15 to 19  | 80 plus | Global     | 1         | Sociodemographic Status           |
| Cocaine use disorders     | Female | 15 to 19  | 80 plus | Data Rich  | 0         | Education (years per capita)      |
| Cocaine use disorders     | Female | 15 to 19  | 80 plus | Data Rich  | 0         | LDI (IS per capita)               |
| Cocaine use disorders     | Female | 15 to 19  | 80 plus | Data Rich  | 1         | Alcohol (litres per capita)       |
| Cocaine use disorders     | Female | 15 to 19  | 80 plus | Data Rich  | 1         | Cumulative Cigarettes (10 Years)  |
| Cocaine use disorders     | Female | 15 to 19  | 80 plus | Data Rich  | 1         | Cumulative Cigarettes (5 Years)   |
| Cocaine use disorders     | Female | 15 to 19  | 80 plus | Data Rich  | 1         | Health System Access 2 (unitless) |
| Cocaine use disorders     | Female | 15 to 19  | 80 plus | Data Rich  | 1         | Smoking Prevalence                |
| Cocaine use disorders     | Female | 15 to 19  | 80 plus | Data Rich  | 1         | Sociodemographic Status           |
| Amphetamine use disorders | Male   | 15 to 19  | 80 plus | Global     | 0         | Education (years per capita)      |
| Amphetamine use disorders | Male   | 15 to 19  | 80 plus | Global     | 0         | Health System Access 2 (unitless) |
| Amphetamine use disorders | Male   | 15 to 19  | 80 plus | Global     | 0         | LDI (IS per capita)               |
| Amphetamine use disorders | Male   | 15 to 19  | 80 plus | Global     | 1         | Alcohol (litres per capita)       |
| Amphetamine use disorders | Male   | 15 to 19  | 80 plus | Global     | 1         | Cumulative Cigarettes (10 Years)  |
| Amphetamine use disorders | Male   | 15 to 19  | 80 plus | Global     | 1         | Cumulative Cigarettes (5 Years)   |
| Amphetamine use disorders | Male   | 15 to 19  | 80 plus | Global     | 1         | Smoking Prevalence                |
| Amphetamine use disorders | Male   | 15 to 19  | 80 plus | Global     | 1         | Sociodemographic Status           |
| Amphetamine use disorders | Male   | 15 to 19  | 80 plus | Data Rich  | 0         | Education (years per capita)      |
| Amphetamine use disorders | Male   | 15 to 19  | 80 plus | Data Rich  | 0         | Health System Access 2 (unitless) |
| Amphetamine use disorders | Male   | 15 to 19  | 80 plus | Data Rich  | 0         | LDI (IS per capita)               |
| Amphetamine use disorders | Male   | 15 to 19  | 80 plus | Data Rich  | 1         | Alcohol (litres per capita)       |
| Amphetamine use disorders | Male   | 15 to 19  | 80 plus | Data Rich  | 1         | Cumulative Cigarettes (10 Years)  |
| Amphetamine use disorders | Male   | 15 to 19  | 80 plus | Data Rich  | 1         | Cumulative Cigarettes (5 Years)   |
| Amphetamine use disorders | Male   | 15 to 19  | 80 plus | Data Rich  | 1         | Smoking Prevalence                |
| Amphetamine use disorders | Male   | 15 to 19  | 80 plus | Data Rich  | 1         | Sociodemographic Status           |
| Amphetamine use disorders | Female | 15 to 19  | 80 plus | Global     | 0         | Education (years per capita)      |
| Amphetamine use disorders | Female | 15 to 19  | 80 plus | Global     | 0         | Health System Access 2 (unitless) |
| Amphetamine use disorders | Female | 15 to 19  | 80 plus | Global     | 0         | LDI (IS per capita)               |
| Amphetamine use disorders | Female | 15 to 19  | 80 plus | Global     | 1         | Alcohol (litres per capita)       |
| Amphetamine use disorders | Female | 15 to 19  | 80 plus | Global     | 1         | Cumulative Cigarettes (10 Years)  |
| Amphetamine use disorders | Female | 15 to 19  | 80 plus | Global     | 1         | Cumulative Cigarettes (5 Years)   |
| Amphetamine use disorders | Female | 15 to 19  | 80 plus | Global     | 1         | Smoking Prevalence                |
| Amphetamine use disorders | Female | 15 to 19  | 80 plus | Global     | 1         | Sociodemographic Status           |
| Amphetamine use disorders | Female | 15 to 19  | 80 plus | Data Rich  | 0         | Education (years per capita)      |
| Amphetamine use disorders | Female | 15 to 19  | 80 plus | Data Rich  | 0         | Health System Access 2 (unitless) |
| Amphetamine use disorders | Female | 15 to 19  | 80 plus | Data Rich  | 0         | LDI (IS per capita)               |
| Amphetamine use disorders | Female | 15 to 19  | 80 plus | Data Rich  | 1         | Alcohol (litres per capita)       |
| Amphetamine use disorders | Female | 15 to 19  | 80 plus | Data Rich  | 1         | Cumulative Cigarettes (10 Years)  |
| Amphetamine use disorders | Female | 15 to 19  | 80 plus | Data Rich  | 1         | Cumulative Cigarettes (5 Years)   |
| Amphetamine use disorders | Female | 15 to 19  | 80 plus | Data Rich  | 1         | Smoking Prevalence                |



**Appendix Table 10: CODEm covariates used, level of covariate, and expected direction of covariate by cause, sex, and age**

| Cause                     | Sex    | Age start | Age end  | Model type | Direction | Covariate                         |
|---------------------------|--------|-----------|----------|------------|-----------|-----------------------------------|
| Amphetamine use disorders | Female | 15 to 19  | 80 plus  | Data Rich  | 1         | Sociodemographic Status           |
| Other drug use disorders  | Male   | 15 to 19  | 80 plus  | Global     | 0         | Education (years per capita)      |
| Other drug use disorders  | Male   | 15 to 19  | 80 plus  | Global     | 0         | Health System Access 2 (unitless) |
| Other drug use disorders  | Male   | 15 to 19  | 80 plus  | Global     | 0         | LDI (IS per capita)               |
| Other drug use disorders  | Male   | 15 to 19  | 80 plus  | Global     | 0         | Sociodemographic Status           |
| Other drug use disorders  | Male   | 15 to 19  | 80 plus  | Global     | 1         | Alcohol (litres per capita)       |
| Other drug use disorders  | Male   | 15 to 19  | 80 plus  | Global     | 1         | Cumulative Cigarettes (10 Years)  |
| Other drug use disorders  | Male   | 15 to 19  | 80 plus  | Global     | 1         | Cumulative Cigarettes (5 Years)   |
| Other drug use disorders  | Male   | 15 to 19  | 80 plus  | Global     | 1         | Smoking Prevalence                |
| Other drug use disorders  | Male   | 15 to 19  | 80 plus  | Data Rich  | 0         | Education (years per capita)      |
| Other drug use disorders  | Male   | 15 to 19  | 80 plus  | Data Rich  | 0         | Health System Access 2 (unitless) |
| Other drug use disorders  | Male   | 15 to 19  | 80 plus  | Data Rich  | 0         | LDI (IS per capita)               |
| Other drug use disorders  | Male   | 15 to 19  | 80 plus  | Data Rich  | 0         | Sociodemographic Status           |
| Other drug use disorders  | Male   | 15 to 19  | 80 plus  | Data Rich  | 1         | Alcohol (litres per capita)       |
| Other drug use disorders  | Male   | 15 to 19  | 80 plus  | Data Rich  | 1         | Cumulative Cigarettes (10 Years)  |
| Other drug use disorders  | Male   | 15 to 19  | 80 plus  | Data Rich  | 1         | Cumulative Cigarettes (5 Years)   |
| Other drug use disorders  | Male   | 15 to 19  | 80 plus  | Data Rich  | 1         | Smoking Prevalence                |
| Other drug use disorders  | Female | 15 to 19  | 80 plus  | Global     | 0         | Education (years per capita)      |
| Other drug use disorders  | Female | 15 to 19  | 80 plus  | Global     | 0         | Health System Access 2 (unitless) |
| Other drug use disorders  | Female | 15 to 19  | 80 plus  | Global     | 0         | LDI (IS per capita)               |
| Other drug use disorders  | Female | 15 to 19  | 80 plus  | Global     | 0         | Sociodemographic Status           |
| Other drug use disorders  | Female | 15 to 19  | 80 plus  | Global     | 1         | Alcohol (litres per capita)       |
| Other drug use disorders  | Female | 15 to 19  | 80 plus  | Global     | 1         | Cumulative Cigarettes (10 Years)  |
| Other drug use disorders  | Female | 15 to 19  | 80 plus  | Global     | 1         | Cumulative Cigarettes (5 Years)   |
| Other drug use disorders  | Female | 15 to 19  | 80 plus  | Global     | 1         | Smoking Prevalence                |
| Other drug use disorders  | Female | 15 to 19  | 80 plus  | Data Rich  | 0         | Education (years per capita)      |
| Other drug use disorders  | Female | 15 to 19  | 80 plus  | Data Rich  | 0         | Health System Access 2 (unitless) |
| Other drug use disorders  | Female | 15 to 19  | 80 plus  | Data Rich  | 0         | LDI (IS per capita)               |
| Other drug use disorders  | Female | 15 to 19  | 80 plus  | Data Rich  | 0         | Sociodemographic Status           |
| Other drug use disorders  | Female | 15 to 19  | 80 plus  | Data Rich  | 1         | Alcohol (litres per capita)       |
| Other drug use disorders  | Female | 15 to 19  | 80 plus  | Data Rich  | 1         | Cumulative Cigarettes (10 Years)  |
| Other drug use disorders  | Female | 15 to 19  | 80 plus  | Data Rich  | 1         | Cumulative Cigarettes (5 Years)   |
| Other drug use disorders  | Female | 15 to 19  | 80 plus  | Data Rich  | 1         | Smoking Prevalence                |
| Eating disorders          | Male   | 5 to 9    | 45 to 49 | Global     | 1         | Sociodemographic Status           |
| Eating disorders          | Male   | 5 to 9    | 45 to 49 | Data Rich  | 1         | Sociodemographic Status           |
| Eating disorders          | Female | 5 to 9    | 45 to 49 | Global     | 1         | Sociodemographic Status           |
| Eating disorders          | Female | 5 to 9    | 45 to 49 | Data Rich  | 1         | Sociodemographic Status           |
| Anorexia nervosa          | Male   | 5 to 9    | 45 to 49 | Global     | 1         | Sociodemographic Status           |
| Anorexia nervosa          | Male   | 5 to 9    | 45 to 49 | Data Rich  | 1         | Sociodemographic Status           |
| Anorexia nervosa          | Female | 5 to 9    | 45 to 49 | Global     | 1         | Sociodemographic Status           |
| Anorexia nervosa          | Female | 5 to 9    | 45 to 49 | Data Rich  | 1         | Sociodemographic Status           |
| Bulimia nervosa           | Male   | 5 to 9    | 45 to 49 | Global     | 1         | Sociodemographic Status           |
| Bulimia nervosa           | Male   | 5 to 9    | 45 to 49 | Data Rich  | 1         | Sociodemographic Status           |
| Bulimia nervosa           | Female | 5 to 9    | 45 to 49 | Global     | 1         | Sociodemographic Status           |

**Appendix Table 10: CODEm covariates used, level of covariate, and expected direction of covariate by cause, sex, and age**

| Cause             | Sex    | Age start      | Age end  | Model type | Direction | Covariate                                         |
|-------------------|--------|----------------|----------|------------|-----------|---------------------------------------------------|
| Bulimia nervosa   | Female | 5 to 9         | 45 to 49 | Data Rich  | 1         | Sociodemographic Status                           |
| Diabetes mellitus | Male   | 15 to 19       | 80 plus  | Global     | -1        | Education (years per capita)                      |
| Diabetes mellitus | Male   | Early Neonatal | 10 to 14 | Global     | -1        | Education (years per capita)                      |
| Diabetes mellitus | Male   | 15 to 19       | 80 plus  | Global     | -1        | Health System Access 2 (unitless)                 |
| Diabetes mellitus | Male   | Early Neonatal | 10 to 14 | Global     | -1        | Health System Access 2 (unitless)                 |
| Diabetes mellitus | Male   | 15 to 19       | 80 plus  | Global     | -1        | LDI (IS per capita)                               |
| Diabetes mellitus | Male   | Early Neonatal | 10 to 14 | Global     | -1        | LDI (IS per capita)                               |
| Diabetes mellitus | Male   | 15 to 19       | 80 plus  | Global     | -1        | fruits adjusted(g)                                |
| Diabetes mellitus | Male   | 15 to 19       | 80 plus  | Global     | -1        | vegetables adjusted(g)                            |
| Diabetes mellitus | Male   | 15 to 19       | 80 plus  | Global     | -1        | whole grains adjusted(g)                          |
| Diabetes mellitus | Male   | 15 to 19       | 80 plus  | Global     | 0         | Sociodemographic Status                           |
| Diabetes mellitus | Male   | 15 to 19       | 80 plus  | Global     | 1         | Animal Fats (kcal per capita)                     |
| Diabetes mellitus | Male   | 15 to 19       | 80 plus  | Global     | 1         | Cholesterol (total, mean per capita)              |
| Diabetes mellitus | Male   | 15 to 19       | 80 plus  | Global     | 1         | Diabetes Age-Standardised Prevalence (proportion) |
| Diabetes mellitus | Male   | 15 to 19       | 80 plus  | Global     | 1         | Diabetes Fasting Plasma Glucose (mmol/L)          |
| Diabetes mellitus | Male   | Early Neonatal | 10 to 14 | Global     | 1         | Malnutrition (proportion <2SD weight for age)     |
| Diabetes mellitus | Male   | 15 to 19       | 80 plus  | Global     | 1         | Mean BMI                                          |
| Diabetes mellitus | Male   | Early Neonatal | 10 to 14 | Global     | 1         | Sociodemographic Status                           |
| Diabetes mellitus | Male   | 15 to 19       | 80 plus  | Global     | 1         | Systolic Blood Pressure (mmHg)                    |
| Diabetes mellitus | Male   | 15 to 19       | 80 plus  | Global     | 1         | energy unadjusted(kcal)                           |
| Diabetes mellitus | Male   | 15 to 19       | 80 plus  | Data Rich  | -1        | Education (years per capita)                      |
| Diabetes mellitus | Male   | Early Neonatal | 10 to 14 | Data Rich  | -1        | Education (years per capita)                      |
| Diabetes mellitus | Male   | 15 to 19       | 80 plus  | Data Rich  | -1        | Health System Access 2 (unitless)                 |
| Diabetes mellitus | Male   | Early Neonatal | 10 to 14 | Data Rich  | -1        | Health System Access 2 (unitless)                 |
| Diabetes mellitus | Male   | 15 to 19       | 80 plus  | Data Rich  | -1        | LDI (IS per capita)                               |
| Diabetes mellitus | Male   | Early Neonatal | 10 to 14 | Data Rich  | -1        | LDI (IS per capita)                               |
| Diabetes mellitus | Male   | 15 to 19       | 80 plus  | Data Rich  | -1        | fruits adjusted(g)                                |
| Diabetes mellitus | Male   | 15 to 19       | 80 plus  | Data Rich  | -1        | vegetables adjusted(g)                            |
| Diabetes mellitus | Male   | 15 to 19       | 80 plus  | Data Rich  | -1        | whole grains adjusted(g)                          |
| Diabetes mellitus | Male   | 15 to 19       | 80 plus  | Data Rich  | 0         | Sociodemographic Status                           |
| Diabetes mellitus | Male   | 15 to 19       | 80 plus  | Data Rich  | 1         | Animal Fats (kcal per capita)                     |
| Diabetes mellitus | Male   | 15 to 19       | 80 plus  | Data Rich  | 1         | Cholesterol (total, mean per capita)              |
| Diabetes mellitus | Male   | 15 to 19       | 80 plus  | Data Rich  | 1         | Diabetes Age-Standardised Prevalence (proportion) |
| Diabetes mellitus | Male   | 15 to 19       | 80 plus  | Data Rich  | 1         | Diabetes Fasting Plasma Glucose (mmol/L)          |
| Diabetes mellitus | Male   | Early Neonatal | 10 to 14 | Data Rich  | 1         | Malnutrition (proportion <2SD weight for age)     |
| Diabetes mellitus | Male   | 15 to 19       | 80 plus  | Data Rich  | 1         | Mean BMI                                          |
| Diabetes mellitus | Male   | Early Neonatal | 10 to 14 | Data Rich  | 1         | Sociodemographic Status                           |
| Diabetes mellitus | Male   | 15 to 19       | 80 plus  | Data Rich  | 1         | Systolic Blood Pressure (mmHg)                    |
| Diabetes mellitus | Male   | 15 to 19       | 80 plus  | Data Rich  | 1         | energy unadjusted(kcal)                           |
| Diabetes mellitus | Female | 15 to 19       | 80 plus  | Global     | -1        | Education (years per capita)                      |
| Diabetes mellitus | Female | Early Neonatal | 10 to 14 | Global     | -1        | Education (years per capita)                      |
| Diabetes mellitus | Female | 15 to 19       | 80 plus  | Global     | -1        | Health System Access 2 (unitless)                 |
| Diabetes mellitus | Female | Early Neonatal | 10 to 14 | Global     | -1        | Health System Access 2 (unitless)                 |
| Diabetes mellitus | Female | 15 to 19       | 80 plus  | Global     | -1        | LDI (IS per capita)                               |

**Appendix Table 10: CODEm covariates used, level of covariate, and expected direction of covariate by cause, sex, and age**

| Cause                    | Sex    | Age start      | Age end  | Model type | Direction | Covariate                                         |
|--------------------------|--------|----------------|----------|------------|-----------|---------------------------------------------------|
| Diabetes mellitus        | Female | Early Neonatal | 10 to 14 | Global     | -1        | LDI (IS per capita)                               |
| Diabetes mellitus        | Female | 15 to 19       | 80 plus  | Global     | -1        | fruits adjusted(g)                                |
| Diabetes mellitus        | Female | 15 to 19       | 80 plus  | Global     | -1        | vegetables adjusted(g)                            |
| Diabetes mellitus        | Female | 15 to 19       | 80 plus  | Global     | -1        | whole grains adjusted(g)                          |
| Diabetes mellitus        | Female | 15 to 19       | 80 plus  | Global     | 0         | Sociodemographic Status                           |
| Diabetes mellitus        | Female | 15 to 19       | 80 plus  | Global     | 1         | Animal Fats (kcal per capita)                     |
| Diabetes mellitus        | Female | 15 to 19       | 80 plus  | Global     | 1         | Cholesterol (total, mean per capita)              |
| Diabetes mellitus        | Female | 15 to 19       | 80 plus  | Global     | 1         | Diabetes Age-Standardised Prevalence (proportion) |
| Diabetes mellitus        | Female | 15 to 19       | 80 plus  | Global     | 1         | Diabetes Fasting Plasma Glucose (mmol/L)          |
| Diabetes mellitus        | Female | Early Neonatal | 10 to 14 | Global     | 1         | Malnutrition (proportion <2SD weight for age)     |
| Diabetes mellitus        | Female | 15 to 19       | 80 plus  | Global     | 1         | Mean BMI                                          |
| Diabetes mellitus        | Female | Early Neonatal | 10 to 14 | Global     | 1         | Sociodemographic Status                           |
| Diabetes mellitus        | Female | 15 to 19       | 80 plus  | Global     | 1         | Systolic Blood Pressure (mmHg)                    |
| Diabetes mellitus        | Female | 15 to 19       | 80 plus  | Global     | 1         | energy unadjusted(kcal)                           |
| Diabetes mellitus        | Female | 15 to 19       | 80 plus  | Data Rich  | -1        | Education (years per capita)                      |
| Diabetes mellitus        | Female | Early Neonatal | 10 to 14 | Data Rich  | -1        | Education (years per capita)                      |
| Diabetes mellitus        | Female | 15 to 19       | 80 plus  | Data Rich  | -1        | Health System Access 2 (unitless)                 |
| Diabetes mellitus        | Female | Early Neonatal | 10 to 14 | Data Rich  | -1        | Health System Access 2 (unitless)                 |
| Diabetes mellitus        | Female | 15 to 19       | 80 plus  | Data Rich  | -1        | LDI (IS per capita)                               |
| Diabetes mellitus        | Female | Early Neonatal | 10 to 14 | Data Rich  | -1        | LDI (IS per capita)                               |
| Diabetes mellitus        | Female | 15 to 19       | 80 plus  | Data Rich  | -1        | fruits adjusted(g)                                |
| Diabetes mellitus        | Female | 15 to 19       | 80 plus  | Data Rich  | -1        | vegetables adjusted(g)                            |
| Diabetes mellitus        | Female | 15 to 19       | 80 plus  | Data Rich  | -1        | whole grains adjusted(g)                          |
| Diabetes mellitus        | Female | 15 to 19       | 80 plus  | Data Rich  | 0         | Sociodemographic Status                           |
| Diabetes mellitus        | Female | 15 to 19       | 80 plus  | Data Rich  | 1         | Animal Fats (kcal per capita)                     |
| Diabetes mellitus        | Female | 15 to 19       | 80 plus  | Data Rich  | 1         | Cholesterol (total, mean per capita)              |
| Diabetes mellitus        | Female | 15 to 19       | 80 plus  | Data Rich  | 1         | Diabetes Age-Standardised Prevalence (proportion) |
| Diabetes mellitus        | Female | 15 to 19       | 80 plus  | Data Rich  | 1         | Diabetes Fasting Plasma Glucose (mmol/L)          |
| Diabetes mellitus        | Female | Early Neonatal | 10 to 14 | Data Rich  | 1         | Malnutrition (proportion <2SD weight for age)     |
| Diabetes mellitus        | Female | 15 to 19       | 80 plus  | Data Rich  | 1         | Mean BMI                                          |
| Diabetes mellitus        | Female | Early Neonatal | 10 to 14 | Data Rich  | 1         | Sociodemographic Status                           |
| Diabetes mellitus        | Female | 15 to 19       | 80 plus  | Data Rich  | 1         | Systolic Blood Pressure (mmHg)                    |
| Diabetes mellitus        | Female | 15 to 19       | 80 plus  | Data Rich  | 1         | energy unadjusted(kcal)                           |
| Acute glomerulonephritis | Male   | Post Neonatal  | 80 plus  | Global     | -1        | Education (years per capita)                      |
| Acute glomerulonephritis | Male   | Post Neonatal  | 80 plus  | Global     | -1        | Health System Access (unitless)                   |
| Acute glomerulonephritis | Male   | Post Neonatal  | 80 plus  | Global     | -1        | Improved Water Source (proportion with access)    |
| Acute glomerulonephritis | Male   | Post Neonatal  | 80 plus  | Global     | -1        | LDI (IS per capita)                               |
| Acute glomerulonephritis | Male   | Post Neonatal  | 80 plus  | Global     | -1        | Sanitation (proportion with access)               |
| Acute glomerulonephritis | Male   | Post Neonatal  | 80 plus  | Global     | -1        | Sociodemographic Status                           |
| Acute glomerulonephritis | Male   | Post Neonatal  | 80 plus  | Global     | 1         | Diabetes Age-Standardised Prevalence (proportion) |
| Acute glomerulonephritis | Male   | Post Neonatal  | 80 plus  | Global     | 1         | Systolic Blood Pressure (mmHg)                    |
| Acute glomerulonephritis | Male   | Post Neonatal  | 80 plus  | Data Rich  | -1        | Education (years per capita)                      |
| Acute glomerulonephritis | Male   | Post Neonatal  | 80 plus  | Data Rich  | -1        | Health System Access (unitless)                   |
| Acute glomerulonephritis | Male   | Post Neonatal  | 80 plus  | Data Rich  | -1        | Improved Water Source (proportion with access)    |

**Appendix Table 10: CODEm covariates used, level of covariate, and expected direction of covariate by cause, sex, and age**

| Cause                    | Sex    | Age start     | Age end | Model type | Direction | Covariate                                         |
|--------------------------|--------|---------------|---------|------------|-----------|---------------------------------------------------|
| Acute glomerulonephritis | Male   | Post Neonatal | 80 plus | Data Rich  | -1        | LDI (IS per capita)                               |
| Acute glomerulonephritis | Male   | Post Neonatal | 80 plus | Data Rich  | -1        | Sanitation (proportion with access)               |
| Acute glomerulonephritis | Male   | Post Neonatal | 80 plus | Data Rich  | -1        | Sociodemographic Status                           |
| Acute glomerulonephritis | Male   | Post Neonatal | 80 plus | Data Rich  | 1         | Diabetes Age-Standardised Prevalence (proportion) |
| Acute glomerulonephritis | Male   | Post Neonatal | 80 plus | Data Rich  | 1         | Systolic Blood Pressure (mmHg)                    |
| Acute glomerulonephritis | Female | Post Neonatal | 80 plus | Global     | -1        | Education (years per capita)                      |
| Acute glomerulonephritis | Female | Post Neonatal | 80 plus | Global     | -1        | Health System Access (unitless)                   |
| Acute glomerulonephritis | Female | Post Neonatal | 80 plus | Global     | -1        | Improved Water Source (proportion with access)    |
| Acute glomerulonephritis | Female | Post Neonatal | 80 plus | Global     | -1        | LDI (IS per capita)                               |
| Acute glomerulonephritis | Female | Post Neonatal | 80 plus | Global     | -1        | Sanitation (proportion with access)               |
| Acute glomerulonephritis | Female | Post Neonatal | 80 plus | Global     | -1        | Sociodemographic Status                           |
| Acute glomerulonephritis | Female | Post Neonatal | 80 plus | Global     | 1         | Diabetes Age-Standardised Prevalence (proportion) |
| Acute glomerulonephritis | Female | Post Neonatal | 80 plus | Global     | 1         | Systolic Blood Pressure (mmHg)                    |
| Acute glomerulonephritis | Female | Post Neonatal | 80 plus | Data Rich  | -1        | Education (years per capita)                      |
| Acute glomerulonephritis | Female | Post Neonatal | 80 plus | Data Rich  | -1        | Health System Access (unitless)                   |
| Acute glomerulonephritis | Female | Post Neonatal | 80 plus | Data Rich  | -1        | Improved Water Source (proportion with access)    |
| Acute glomerulonephritis | Female | Post Neonatal | 80 plus | Data Rich  | -1        | LDI (IS per capita)                               |
| Acute glomerulonephritis | Female | Post Neonatal | 80 plus | Data Rich  | -1        | Sanitation (proportion with access)               |
| Acute glomerulonephritis | Female | Post Neonatal | 80 plus | Data Rich  | -1        | Sociodemographic Status                           |
| Acute glomerulonephritis | Female | Post Neonatal | 80 plus | Data Rich  | 1         | Diabetes Age-Standardised Prevalence (proportion) |
| Acute glomerulonephritis | Female | Post Neonatal | 80 plus | Data Rich  | 1         | Systolic Blood Pressure (mmHg)                    |
| Chronic kidney disease   | Male   | Post Neonatal | 80 plus | Global     | -1        | Education (years per capita)                      |
| Chronic kidney disease   | Male   | Post Neonatal | 80 plus | Global     | -1        | Health System Access (unitless)                   |
| Chronic kidney disease   | Male   | Post Neonatal | 80 plus | Global     | -1        | LDI (IS per capita)                               |
| Chronic kidney disease   | Male   | Post Neonatal | 80 plus | Global     | 0         | Animal Fats (kcal per capita)                     |
| Chronic kidney disease   | Male   | Post Neonatal | 80 plus | Global     | 0         | Red Meat (kcal per capita)                        |
| Chronic kidney disease   | Male   | Post Neonatal | 80 plus | Global     | 0         | Sociodemographic Status                           |
| Chronic kidney disease   | Male   | Post Neonatal | 80 plus | Global     | 0         | Whole Grains (kcal per capita)                    |
| Chronic kidney disease   | Male   | Post Neonatal | 80 plus | Global     | 1         | Cholesterol (total, mean per capita)              |
| Chronic kidney disease   | Male   | Post Neonatal | 80 plus | Global     | 1         | Diabetes Age-Standardised Prevalence (proportion) |
| Chronic kidney disease   | Male   | Post Neonatal | 80 plus | Global     | 1         | Diabetes Fasting Plasma Glucose (mmol/L)          |
| Chronic kidney disease   | Male   | Post Neonatal | 80 plus | Global     | 1         | Mean BMI                                          |
| Chronic kidney disease   | Male   | Post Neonatal | 80 plus | Global     | 1         | Systolic Blood Pressure (mmHg)                    |
| Chronic kidney disease   | Male   | Post Neonatal | 80 plus | Global     | 1         | Total Calories (kcal per capita)                  |
| Chronic kidney disease   | Male   | Post Neonatal | 80 plus | Data Rich  | -1        | Education (years per capita)                      |
| Chronic kidney disease   | Male   | Post Neonatal | 80 plus | Data Rich  | -1        | Health System Access (unitless)                   |
| Chronic kidney disease   | Male   | Post Neonatal | 80 plus | Data Rich  | -1        | LDI (IS per capita)                               |
| Chronic kidney disease   | Male   | Post Neonatal | 80 plus | Data Rich  | 0         | Animal Fats (kcal per capita)                     |
| Chronic kidney disease   | Male   | Post Neonatal | 80 plus | Data Rich  | 0         | Red Meat (kcal per capita)                        |
| Chronic kidney disease   | Male   | Post Neonatal | 80 plus | Data Rich  | 0         | Sociodemographic Status                           |
| Chronic kidney disease   | Male   | Post Neonatal | 80 plus | Data Rich  | 0         | Whole Grains (kcal per capita)                    |
| Chronic kidney disease   | Male   | Post Neonatal | 80 plus | Data Rich  | 1         | Cholesterol (total, mean per capita)              |
| Chronic kidney disease   | Male   | Post Neonatal | 80 plus | Data Rich  | 1         | Diabetes Age-Standardised Prevalence (proportion) |
| Chronic kidney disease   | Male   | Post Neonatal | 80 plus | Data Rich  | 1         | Diabetes Fasting Plasma Glucose (mmol/L)          |

**Appendix Table 10: CODEm covariates used, level of covariate, and expected direction of covariate by cause, sex, and age**

| Cause                                 | Sex    | Age start      | Age end | Model type | Direction | Covariate                                         |
|---------------------------------------|--------|----------------|---------|------------|-----------|---------------------------------------------------|
| Chronic kidney disease                | Male   | Post Neonatal  | 80 plus | Data Rich  | 1         | Mean BMI                                          |
| Chronic kidney disease                | Male   | Post Neonatal  | 80 plus | Data Rich  | 1         | Systolic Blood Pressure (mmHg)                    |
| Chronic kidney disease                | Male   | Post Neonatal  | 80 plus | Data Rich  | 1         | Total Calories (kcal per capita)                  |
| Chronic kidney disease                | Female | Post Neonatal  | 80 plus | Global     | -1        | Education (years per capita)                      |
| Chronic kidney disease                | Female | Post Neonatal  | 80 plus | Global     | -1        | Health System Access (unitless)                   |
| Chronic kidney disease                | Female | Post Neonatal  | 80 plus | Global     | -1        | LDI (IS per capita)                               |
| Chronic kidney disease                | Female | Post Neonatal  | 80 plus | Global     | 0         | Animal Fats (kcal per capita)                     |
| Chronic kidney disease                | Female | Post Neonatal  | 80 plus | Global     | 0         | Red Meat (kcal per capita)                        |
| Chronic kidney disease                | Female | Post Neonatal  | 80 plus | Global     | 0         | Sociodemographic Status                           |
| Chronic kidney disease                | Female | Post Neonatal  | 80 plus | Global     | 0         | Whole Grains (kcal per capita)                    |
| Chronic kidney disease                | Female | Post Neonatal  | 80 plus | Global     | 1         | Cholesterol (total, mean per capita)              |
| Chronic kidney disease                | Female | Post Neonatal  | 80 plus | Global     | 1         | Diabetes Age-Standardised Prevalence (proportion) |
| Chronic kidney disease                | Female | Post Neonatal  | 80 plus | Global     | 1         | Diabetes Fasting Plasma Glucose (mmol/L)          |
| Chronic kidney disease                | Female | Post Neonatal  | 80 plus | Global     | 1         | Mean BMI                                          |
| Chronic kidney disease                | Female | Post Neonatal  | 80 plus | Global     | 1         | Systolic Blood Pressure (mmHg)                    |
| Chronic kidney disease                | Female | Post Neonatal  | 80 plus | Global     | 1         | Total Calories (kcal per capita)                  |
| Chronic kidney disease                | Female | Post Neonatal  | 80 plus | Data Rich  | -1        | Education (years per capita)                      |
| Chronic kidney disease                | Female | Post Neonatal  | 80 plus | Data Rich  | -1        | Health System Access (unitless)                   |
| Chronic kidney disease                | Female | Post Neonatal  | 80 plus | Data Rich  | -1        | LDI (IS per capita)                               |
| Chronic kidney disease                | Female | Post Neonatal  | 80 plus | Data Rich  | 0         | Animal Fats (kcal per capita)                     |
| Chronic kidney disease                | Female | Post Neonatal  | 80 plus | Data Rich  | 0         | Red Meat (kcal per capita)                        |
| Chronic kidney disease                | Female | Post Neonatal  | 80 plus | Data Rich  | 0         | Sociodemographic Status                           |
| Chronic kidney disease                | Female | Post Neonatal  | 80 plus | Data Rich  | 0         | Whole Grains (kcal per capita)                    |
| Chronic kidney disease                | Female | Post Neonatal  | 80 plus | Data Rich  | 1         | Cholesterol (total, mean per capita)              |
| Chronic kidney disease                | Female | Post Neonatal  | 80 plus | Data Rich  | 1         | Diabetes Age-Standardised Prevalence (proportion) |
| Chronic kidney disease                | Female | Post Neonatal  | 80 plus | Data Rich  | 1         | Diabetes Fasting Plasma Glucose (mmol/L)          |
| Chronic kidney disease                | Female | Post Neonatal  | 80 plus | Data Rich  | 1         | Mean BMI                                          |
| Chronic kidney disease                | Female | Post Neonatal  | 80 plus | Data Rich  | 1         | Systolic Blood Pressure (mmHg)                    |
| Chronic kidney disease                | Female | Post Neonatal  | 80 plus | Data Rich  | 1         | Total Calories (kcal per capita)                  |
| Urinary diseases and male infertility | Male   | Early Neonatal | 80 plus | Global     | -1        | Education (years per capita)                      |
| Urinary diseases and male infertility | Male   | Early Neonatal | 80 plus | Global     | -1        | Health System Access 2 (unitless)                 |
| Urinary diseases and male infertility | Male   | Early Neonatal | 80 plus | Global     | -1        | LDI (IS per capita)                               |
| Urinary diseases and male infertility | Male   | Early Neonatal | 80 plus | Global     | 0         | Latitude 15 to 30 (proportion)                    |
| Urinary diseases and male infertility | Male   | Early Neonatal | 80 plus | Global     | 0         | Latitude 30 to 45 (proportion)                    |
| Urinary diseases and male infertility | Male   | Early Neonatal | 80 plus | Global     | 0         | Latitude Over 45 (proportion)                     |
| Urinary diseases and male infertility | Male   | Early Neonatal | 80 plus | Global     | 0         | Latitude Under 15 (proportion)                    |
| Urinary diseases and male infertility | Male   | Early Neonatal | 80 plus | Global     | 0         | Sociodemographic Status                           |
| Urinary diseases and male infertility | Male   | Early Neonatal | 80 plus | Global     | 1         | Mean BMI                                          |
| Urinary diseases and male infertility | Male   | Early Neonatal | 80 plus | Data Rich  | -1        | Education (years per capita)                      |
| Urinary diseases and male infertility | Male   | Early Neonatal | 80 plus | Data Rich  | -1        | Health System Access 2 (unitless)                 |
| Urinary diseases and male infertility | Male   | Early Neonatal | 80 plus | Data Rich  | -1        | LDI (IS per capita)                               |
| Urinary diseases and male infertility | Male   | Early Neonatal | 80 plus | Data Rich  | 0         | Latitude 15 to 30 (proportion)                    |
| Urinary diseases and male infertility | Male   | Early Neonatal | 80 plus | Data Rich  | 0         | Latitude 30 to 45 (proportion)                    |
| Urinary diseases and male infertility | Male   | Early Neonatal | 80 plus | Data Rich  | 0         | Latitude Over 45 (proportion)                     |

**Appendix Table 10: CODEm covariates used, level of covariate, and expected direction of covariate by cause, sex, and age**

| Cause                                               | Sex    | Age start      | Age end | Model type | Direction | Covariate                           |
|-----------------------------------------------------|--------|----------------|---------|------------|-----------|-------------------------------------|
| Urinary diseases and male infertility               | Male   | Early Neonatal | 80 plus | Data Rich  | 0         | Latitude Under 15 (proportion)      |
| Urinary diseases and male infertility               | Male   | Early Neonatal | 80 plus | Data Rich  | 0         | Sociodemographic Status             |
| Urinary diseases and male infertility               | Male   | Early Neonatal | 80 plus | Data Rich  | 1         | Mean BMI                            |
| Urinary diseases and male infertility               | Female | Early Neonatal | 80 plus | Global     | -1        | Education (years per capita)        |
| Urinary diseases and male infertility               | Female | Early Neonatal | 80 plus | Global     | -1        | Health System Access 2 (unitless)   |
| Urinary diseases and male infertility               | Female | Early Neonatal | 80 plus | Global     | -1        | LDI (IS per capita)                 |
| Urinary diseases and male infertility               | Female | Early Neonatal | 80 plus | Global     | 0         | Latitude 15 to 30 (proportion)      |
| Urinary diseases and male infertility               | Female | Early Neonatal | 80 plus | Global     | 0         | Latitude 30 to 45 (proportion)      |
| Urinary diseases and male infertility               | Female | Early Neonatal | 80 plus | Global     | 0         | Latitude Over 45 (proportion)       |
| Urinary diseases and male infertility               | Female | Early Neonatal | 80 plus | Global     | 0         | Latitude Under 15 (proportion)      |
| Urinary diseases and male infertility               | Female | Early Neonatal | 80 plus | Global     | 0         | Sociodemographic Status             |
| Urinary diseases and male infertility               | Female | Early Neonatal | 80 plus | Global     | 1         | Mean BMI                            |
| Urinary diseases and male infertility               | Female | Early Neonatal | 80 plus | Data Rich  | -1        | Education (years per capita)        |
| Urinary diseases and male infertility               | Female | Early Neonatal | 80 plus | Data Rich  | -1        | Health System Access 2 (unitless)   |
| Urinary diseases and male infertility               | Female | Early Neonatal | 80 plus | Data Rich  | -1        | LDI (IS per capita)                 |
| Urinary diseases and male infertility               | Female | Early Neonatal | 80 plus | Data Rich  | 0         | Latitude 15 to 30 (proportion)      |
| Urinary diseases and male infertility               | Female | Early Neonatal | 80 plus | Data Rich  | 0         | Latitude 30 to 45 (proportion)      |
| Urinary diseases and male infertility               | Female | Early Neonatal | 80 plus | Data Rich  | 0         | Latitude Over 45 (proportion)       |
| Urinary diseases and male infertility               | Female | Early Neonatal | 80 plus | Data Rich  | 0         | Latitude Under 15 (proportion)      |
| Urinary diseases and male infertility               | Female | Early Neonatal | 80 plus | Data Rich  | 0         | Sociodemographic Status             |
| Urinary diseases and male infertility               | Female | Early Neonatal | 80 plus | Data Rich  | 1         | Mean BMI                            |
| Interstitial nephritis and urinary tract infections | Male   | Early Neonatal | 80 plus | Global     | -1        | Education (years per capita)        |
| Interstitial nephritis and urinary tract infections | Male   | Early Neonatal | 80 plus | Global     | -1        | Health System Access 2 (unitless)   |
| Interstitial nephritis and urinary tract infections | Male   | Early Neonatal | 80 plus | Global     | -1        | LDI (IS per capita)                 |
| Interstitial nephritis and urinary tract infections | Male   | Early Neonatal | 80 plus | Global     | 0         | Sociodemographic Status             |
| Interstitial nephritis and urinary tract infections | Male   | Early Neonatal | 80 plus | Global     | 1         | Sanitation (proportion with access) |
| Interstitial nephritis and urinary tract infections | Male   | Early Neonatal | 80 plus | Data Rich  | -1        | Education (years per capita)        |
| Interstitial nephritis and urinary tract infections | Male   | Early Neonatal | 80 plus | Data Rich  | -1        | Health System Access 2 (unitless)   |
| Interstitial nephritis and urinary tract infections | Male   | Early Neonatal | 80 plus | Data Rich  | -1        | LDI (IS per capita)                 |
| Interstitial nephritis and urinary tract infections | Male   | Early Neonatal | 80 plus | Data Rich  | 0         | Sociodemographic Status             |
| Interstitial nephritis and urinary tract infections | Male   | Early Neonatal | 80 plus | Data Rich  | 1         | Sanitation (proportion with access) |
| Interstitial nephritis and urinary tract infections | Female | Early Neonatal | 80 plus | Global     | -1        | Education (years per capita)        |
| Interstitial nephritis and urinary tract infections | Female | Early Neonatal | 80 plus | Global     | -1        | Health System Access 2 (unitless)   |
| Interstitial nephritis and urinary tract infections | Female | Early Neonatal | 80 plus | Global     | -1        | LDI (IS per capita)                 |
| Interstitial nephritis and urinary tract infections | Female | Early Neonatal | 80 plus | Global     | 0         | Sociodemographic Status             |
| Interstitial nephritis and urinary tract infections | Female | Early Neonatal | 80 plus | Global     | 1         | Sanitation (proportion with access) |
| Interstitial nephritis and urinary tract infections | Female | Early Neonatal | 80 plus | Data Rich  | -1        | Education (years per capita)        |
| Interstitial nephritis and urinary tract infections | Female | Early Neonatal | 80 plus | Data Rich  | -1        | Health System Access 2 (unitless)   |
| Interstitial nephritis and urinary tract infections | Female | Early Neonatal | 80 plus | Data Rich  | -1        | LDI (IS per capita)                 |
| Interstitial nephritis and urinary tract infections | Female | Early Neonatal | 80 plus | Data Rich  | 0         | Sociodemographic Status             |
| Interstitial nephritis and urinary tract infections | Female | Early Neonatal | 80 plus | Data Rich  | 1         | Sanitation (proportion with access) |
| Urolithiasis                                        | Male   | 5 to 9         | 80 plus | Global     | -1        | Education (years per capita)        |
| Urolithiasis                                        | Male   | 5 to 9         | 80 plus | Global     | -1        | Fruits (kcal per capita)            |
| Urolithiasis                                        | Male   | 5 to 9         | 80 plus | Global     | -1        | Health System Access (unitless)     |

**Appendix Table 10: CODEm covariates used, level of covariate, and expected direction of covariate by cause, sex, and age**

| Cause                  | Sex    | Age start      | Age end | Model type | Direction | Covariate                                                      |
|------------------------|--------|----------------|---------|------------|-----------|----------------------------------------------------------------|
| Urolithiasis           | Male   | 5 to 9         | 80 plus | Global     | -1        | LDI (IS per capita)                                            |
| Urolithiasis           | Male   | 5 to 9         | 80 plus | Global     | -1        | Vegetables (kcal per capita)                                   |
| Urolithiasis           | Male   | 5 to 9         | 80 plus | Global     | 0         | Sociodemographic Status                                        |
| Urolithiasis           | Male   | 5 to 9         | 80 plus | Global     | 1         | 90th percentile climatic temperature in the given country-year |
| Urolithiasis           | Male   | 5 to 9         | 80 plus | Global     | 1         | Animal Fats (kcal per capita)                                  |
| Urolithiasis           | Male   | 5 to 9         | 80 plus | Global     | 1         | Red Meat (kcal per capita)                                     |
| Urolithiasis           | Male   | 5 to 9         | 80 plus | Data Rich  | -1        | Education (years per capita)                                   |
| Urolithiasis           | Male   | 5 to 9         | 80 plus | Data Rich  | -1        | Fruits (kcal per capita)                                       |
| Urolithiasis           | Male   | 5 to 9         | 80 plus | Data Rich  | -1        | Health System Access (unitless)                                |
| Urolithiasis           | Male   | 5 to 9         | 80 plus | Data Rich  | -1        | LDI (IS per capita)                                            |
| Urolithiasis           | Male   | 5 to 9         | 80 plus | Data Rich  | -1        | Vegetables (kcal per capita)                                   |
| Urolithiasis           | Male   | 5 to 9         | 80 plus | Data Rich  | 0         | Sociodemographic Status                                        |
| Urolithiasis           | Male   | 5 to 9         | 80 plus | Data Rich  | 1         | 90th percentile climatic temperature in the given country-year |
| Urolithiasis           | Male   | 5 to 9         | 80 plus | Data Rich  | 1         | Animal Fats (kcal per capita)                                  |
| Urolithiasis           | Male   | 5 to 9         | 80 plus | Data Rich  | 1         | Red Meat (kcal per capita)                                     |
| Urolithiasis           | Female | 5 to 9         | 80 plus | Global     | -1        | Education (years per capita)                                   |
| Urolithiasis           | Female | 5 to 9         | 80 plus | Global     | -1        | Fruits (kcal per capita)                                       |
| Urolithiasis           | Female | 5 to 9         | 80 plus | Global     | -1        | Health System Access (unitless)                                |
| Urolithiasis           | Female | 5 to 9         | 80 plus | Global     | -1        | LDI (IS per capita)                                            |
| Urolithiasis           | Female | 5 to 9         | 80 plus | Global     | -1        | Vegetables (kcal per capita)                                   |
| Urolithiasis           | Female | 5 to 9         | 80 plus | Global     | 0         | Sociodemographic Status                                        |
| Urolithiasis           | Female | 5 to 9         | 80 plus | Global     | 1         | 90th percentile climatic temperature in the given country-year |
| Urolithiasis           | Female | 5 to 9         | 80 plus | Global     | 1         | Animal Fats (kcal per capita)                                  |
| Urolithiasis           | Female | 5 to 9         | 80 plus | Global     | 1         | Red Meat (kcal per capita)                                     |
| Urolithiasis           | Female | 5 to 9         | 80 plus | Data Rich  | -1        | Education (years per capita)                                   |
| Urolithiasis           | Female | 5 to 9         | 80 plus | Data Rich  | -1        | Fruits (kcal per capita)                                       |
| Urolithiasis           | Female | 5 to 9         | 80 plus | Data Rich  | -1        | Health System Access (unitless)                                |
| Urolithiasis           | Female | 5 to 9         | 80 plus | Data Rich  | -1        | LDI (IS per capita)                                            |
| Urolithiasis           | Female | 5 to 9         | 80 plus | Data Rich  | -1        | Vegetables (kcal per capita)                                   |
| Urolithiasis           | Female | 5 to 9         | 80 plus | Data Rich  | 0         | Sociodemographic Status                                        |
| Urolithiasis           | Female | 5 to 9         | 80 plus | Data Rich  | 1         | 90th percentile climatic temperature in the given country-year |
| Urolithiasis           | Female | 5 to 9         | 80 plus | Data Rich  | 1         | Animal Fats (kcal per capita)                                  |
| Urolithiasis           | Female | 5 to 9         | 80 plus | Data Rich  | 1         | Red Meat (kcal per capita)                                     |
| Other urinary diseases | Male   | Early Neonatal | 80 plus | Global     | -1        | Education (years per capita)                                   |
| Other urinary diseases | Male   | Early Neonatal | 80 plus | Global     | -1        | Health System Access 2 (unitless)                              |
| Other urinary diseases | Male   | Early Neonatal | 80 plus | Global     | -1        | LDI (IS per capita)                                            |
| Other urinary diseases | Male   | Early Neonatal | 80 plus | Global     | 0         | Sociodemographic Status                                        |
| Other urinary diseases | Male   | Early Neonatal | 80 plus | Global     | 1         | Mean BMI                                                       |
| Other urinary diseases | Male   | Early Neonatal | 80 plus | Data Rich  | -1        | Education (years per capita)                                   |
| Other urinary diseases | Male   | Early Neonatal | 80 plus | Data Rich  | -1        | Health System Access 2 (unitless)                              |
| Other urinary diseases | Male   | Early Neonatal | 80 plus | Data Rich  | -1        | LDI (IS per capita)                                            |
| Other urinary diseases | Male   | Early Neonatal | 80 plus | Data Rich  | 0         | Sociodemographic Status                                        |
| Other urinary diseases | Male   | Early Neonatal | 80 plus | Data Rich  | 1         | Mean BMI                                                       |
| Other urinary diseases | Female | Early Neonatal | 80 plus | Global     | 0         | Sociodemographic Status                                        |

**Appendix Table 10: CODEm covariates used, level of covariate, and expected direction of covariate by cause, sex, and age**

| Cause                       | Sex    | Age start      | Age end  | Model type | Direction | Covariate                             |
|-----------------------------|--------|----------------|----------|------------|-----------|---------------------------------------|
| Other urinary diseases      | Female | Early Neonatal | 80 plus  | Global     | 1         | Education (years per capita)          |
| Other urinary diseases      | Female | Early Neonatal | 80 plus  | Global     | 1         | Health System Access 2 (unitless)     |
| Other urinary diseases      | Female | Early Neonatal | 80 plus  | Global     | 1         | LDI (IS per capita)                   |
| Other urinary diseases      | Female | Early Neonatal | 80 plus  | Global     | 1         | Mean BMI                              |
| Other urinary diseases      | Female | Early Neonatal | 80 plus  | Data Rich  | 0         | Sociodemographic Status               |
| Other urinary diseases      | Female | Early Neonatal | 80 plus  | Data Rich  | 1         | Education (years per capita)          |
| Other urinary diseases      | Female | Early Neonatal | 80 plus  | Data Rich  | 1         | Health System Access 2 (unitless)     |
| Other urinary diseases      | Female | Early Neonatal | 80 plus  | Data Rich  | 1         | LDI (IS per capita)                   |
| Other urinary diseases      | Female | Early Neonatal | 80 plus  | Data Rich  | 1         | Mean BMI                              |
| Gynecological diseases      | Female | 15 to 19       | 80 plus  | Global     | -1        | Education (years per capita)          |
| Gynecological diseases      | Female | 15 to 19       | 80 plus  | Global     | -1        | Health System Access (unitless)       |
| Gynecological diseases      | Female | 15 to 19       | 80 plus  | Global     | -1        | LDI (IS per capita)                   |
| Gynecological diseases      | Female | 15 to 19       | 80 plus  | Global     | -1        | Skilled Birth Attendance (proportion) |
| Gynecological diseases      | Female | 15 to 19       | 80 plus  | Global     | -1        | Sociodemographic Status               |
| Gynecological diseases      | Female | 15 to 19       | 80 plus  | Global     | 0         | Smoking Prevalence                    |
| Gynecological diseases      | Female | 15 to 19       | 80 plus  | Global     | 1         | Live Births 35+ (proportion)          |
| Gynecological diseases      | Female | 15 to 19       | 80 plus  | Global     | 1         | Total Fertility Rate                  |
| Gynecological diseases      | Female | 15 to 19       | 80 plus  | Data Rich  | -1        | Education (years per capita)          |
| Gynecological diseases      | Female | 15 to 19       | 80 plus  | Data Rich  | -1        | Health System Access (unitless)       |
| Gynecological diseases      | Female | 15 to 19       | 80 plus  | Data Rich  | -1        | LDI (IS per capita)                   |
| Gynecological diseases      | Female | 15 to 19       | 80 plus  | Data Rich  | -1        | Skilled Birth Attendance (proportion) |
| Gynecological diseases      | Female | 15 to 19       | 80 plus  | Data Rich  | -1        | Sociodemographic Status               |
| Gynecological diseases      | Female | 15 to 19       | 80 plus  | Data Rich  | 0         | Smoking Prevalence                    |
| Gynecological diseases      | Female | 15 to 19       | 80 plus  | Data Rich  | 1         | Live Births 35+ (proportion)          |
| Gynecological diseases      | Female | 15 to 19       | 80 plus  | Data Rich  | 1         | Total Fertility Rate                  |
| Uterine fibroids            | Female | 15 to 19       | 80 plus  | Global     | -1        | Education (years per capita)          |
| Uterine fibroids            | Female | 15 to 19       | 80 plus  | Global     | -1        | Health System Access (unitless)       |
| Uterine fibroids            | Female | 15 to 19       | 80 plus  | Global     | -1        | LDI (IS per capita)                   |
| Uterine fibroids            | Female | 15 to 19       | 80 plus  | Global     | -1        | Skilled Birth Attendance (proportion) |
| Uterine fibroids            | Female | 15 to 19       | 80 plus  | Global     | -1        | Sociodemographic Status               |
| Uterine fibroids            | Female | 15 to 19       | 80 plus  | Global     | 0         | Smoking Prevalence                    |
| Uterine fibroids            | Female | 15 to 19       | 80 plus  | Global     | 1         | Live Births 35+ (proportion)          |
| Uterine fibroids            | Female | 15 to 19       | 80 plus  | Global     | 1         | Total Fertility Rate                  |
| Uterine fibroids            | Female | 15 to 19       | 80 plus  | Data Rich  | -1        | Education (years per capita)          |
| Uterine fibroids            | Female | 15 to 19       | 80 plus  | Data Rich  | -1        | Health System Access (unitless)       |
| Uterine fibroids            | Female | 15 to 19       | 80 plus  | Data Rich  | -1        | LDI (IS per capita)                   |
| Uterine fibroids            | Female | 15 to 19       | 80 plus  | Data Rich  | -1        | Skilled Birth Attendance (proportion) |
| Uterine fibroids            | Female | 15 to 19       | 80 plus  | Data Rich  | -1        | Sociodemographic Status               |
| Uterine fibroids            | Female | 15 to 19       | 80 plus  | Data Rich  | 0         | Smoking Prevalence                    |
| Uterine fibroids            | Female | 15 to 19       | 80 plus  | Data Rich  | 1         | Live Births 35+ (proportion)          |
| Uterine fibroids            | Female | 15 to 19       | 80 plus  | Data Rich  | 1         | Total Fertility Rate                  |
| Polycystic ovarian syndrome | Female | 15 to 19       | 50 to 54 | Global     | -1        | Education (years per capita)          |
| Polycystic ovarian syndrome | Female | 15 to 19       | 50 to 54 | Global     | -1        | Health System Access (unitless)       |
| Polycystic ovarian syndrome | Female | 15 to 19       | 50 to 54 | Global     | -1        | LDI (IS per capita)                   |



**Appendix Table 10: CODEm covariates used, level of covariate, and expected direction of covariate by cause, sex, and age**

| Cause                       | Sex    | Age start | Age end  | Model type | Direction | Covariate                             |
|-----------------------------|--------|-----------|----------|------------|-----------|---------------------------------------|
| Polycystic ovarian syndrome | Female | 15 to 19  | 50 to 54 | Global     | -1        | Skilled Birth Attendance (proportion) |
| Polycystic ovarian syndrome | Female | 15 to 19  | 50 to 54 | Global     | -1        | Sociodemographic Status               |
| Polycystic ovarian syndrome | Female | 15 to 19  | 50 to 54 | Global     | 0         | Smoking Prevalence                    |
| Polycystic ovarian syndrome | Female | 15 to 19  | 50 to 54 | Global     | 1         | Live Births 35+ (proportion)          |
| Polycystic ovarian syndrome | Female | 15 to 19  | 50 to 54 | Global     | 1         | Total Fertility Rate                  |
| Polycystic ovarian syndrome | Female | 15 to 19  | 50 to 54 | Data Rich  | -1        | Education (years per capita)          |
| Polycystic ovarian syndrome | Female | 15 to 19  | 50 to 54 | Data Rich  | -1        | Health System Access (unitless)       |
| Polycystic ovarian syndrome | Female | 15 to 19  | 50 to 54 | Data Rich  | -1        | LDI (IS per capita)                   |
| Polycystic ovarian syndrome | Female | 15 to 19  | 50 to 54 | Data Rich  | -1        | Skilled Birth Attendance (proportion) |
| Polycystic ovarian syndrome | Female | 15 to 19  | 50 to 54 | Data Rich  | -1        | Sociodemographic Status               |
| Polycystic ovarian syndrome | Female | 15 to 19  | 50 to 54 | Data Rich  | 0         | Smoking Prevalence                    |
| Polycystic ovarian syndrome | Female | 15 to 19  | 50 to 54 | Data Rich  | 1         | Live Births 35+ (proportion)          |
| Polycystic ovarian syndrome | Female | 15 to 19  | 50 to 54 | Data Rich  | 1         | Total Fertility Rate                  |
| Endometriosis               | Female | 15 to 19  | 50 to 54 | Global     | -1        | Education (years per capita)          |
| Endometriosis               | Female | 15 to 19  | 50 to 54 | Global     | -1        | Health System Access (unitless)       |
| Endometriosis               | Female | 15 to 19  | 50 to 54 | Global     | -1        | LDI (IS per capita)                   |
| Endometriosis               | Female | 15 to 19  | 50 to 54 | Global     | -1        | Skilled Birth Attendance (proportion) |
| Endometriosis               | Female | 15 to 19  | 50 to 54 | Global     | -1        | Sociodemographic Status               |
| Endometriosis               | Female | 15 to 19  | 50 to 54 | Global     | 0         | Smoking Prevalence                    |
| Endometriosis               | Female | 15 to 19  | 50 to 54 | Global     | 1         | Live Births 35+ (proportion)          |
| Endometriosis               | Female | 15 to 19  | 50 to 54 | Global     | 1         | Total Fertility Rate                  |
| Endometriosis               | Female | 15 to 19  | 50 to 54 | Data Rich  | -1        | Education (years per capita)          |
| Endometriosis               | Female | 15 to 19  | 50 to 54 | Data Rich  | -1        | Health System Access (unitless)       |
| Endometriosis               | Female | 15 to 19  | 50 to 54 | Data Rich  | -1        | LDI (IS per capita)                   |
| Endometriosis               | Female | 15 to 19  | 50 to 54 | Data Rich  | -1        | Skilled Birth Attendance (proportion) |
| Endometriosis               | Female | 15 to 19  | 50 to 54 | Data Rich  | -1        | Sociodemographic Status               |
| Endometriosis               | Female | 15 to 19  | 50 to 54 | Data Rich  | 0         | Smoking Prevalence                    |
| Endometriosis               | Female | 15 to 19  | 50 to 54 | Data Rich  | 1         | Live Births 35+ (proportion)          |
| Endometriosis               | Female | 15 to 19  | 50 to 54 | Data Rich  | 1         | Total Fertility Rate                  |
| Genital prolapse            | Female | 15 to 19  | 80 plus  | Global     | -1        | Education (years per capita)          |
| Genital prolapse            | Female | 15 to 19  | 80 plus  | Global     | -1        | Health System Access (unitless)       |
| Genital prolapse            | Female | 15 to 19  | 80 plus  | Global     | -1        | LDI (IS per capita)                   |
| Genital prolapse            | Female | 15 to 19  | 80 plus  | Global     | -1        | Skilled Birth Attendance (proportion) |
| Genital prolapse            | Female | 15 to 19  | 80 plus  | Global     | -1        | Sociodemographic Status               |
| Genital prolapse            | Female | 15 to 19  | 80 plus  | Global     | 0         | Smoking Prevalence                    |
| Genital prolapse            | Female | 15 to 19  | 80 plus  | Global     | 1         | Live Births 35+ (proportion)          |
| Genital prolapse            | Female | 15 to 19  | 80 plus  | Global     | 1         | Total Fertility Rate                  |
| Genital prolapse            | Female | 15 to 19  | 80 plus  | Data Rich  | -1        | Education (years per capita)          |
| Genital prolapse            | Female | 15 to 19  | 80 plus  | Data Rich  | -1        | Health System Access (unitless)       |
| Genital prolapse            | Female | 15 to 19  | 80 plus  | Data Rich  | -1        | LDI (IS per capita)                   |
| Genital prolapse            | Female | 15 to 19  | 80 plus  | Data Rich  | -1        | Skilled Birth Attendance (proportion) |
| Genital prolapse            | Female | 15 to 19  | 80 plus  | Data Rich  | -1        | Sociodemographic Status               |
| Genital prolapse            | Female | 15 to 19  | 80 plus  | Data Rich  | 0         | Smoking Prevalence                    |
| Genital prolapse            | Female | 15 to 19  | 80 plus  | Data Rich  | 1         | Live Births 35+ (proportion)          |

**Appendix Table 10: CODEm covariates used, level of covariate, and expected direction of covariate by cause, sex, and age**

| Cause                                    | Sex    | Age start      | Age end | Model type | Direction | Covariate                                                                    |
|------------------------------------------|--------|----------------|---------|------------|-----------|------------------------------------------------------------------------------|
| Genital prolapse                         | Female | 15 to 19       | 80 plus | Data Rich  | 1         | Total Fertility Rate                                                         |
| Other gynecological diseases             | Female | 15 to 19       | 80 plus | Global     | -1        | Education (years per capita)                                                 |
| Other gynecological diseases             | Female | 15 to 19       | 80 plus | Global     | -1        | Health System Access (unitless)                                              |
| Other gynecological diseases             | Female | 15 to 19       | 80 plus | Global     | -1        | LDI (IS per capita)                                                          |
| Other gynecological diseases             | Female | 15 to 19       | 80 plus | Global     | -1        | Skilled Birth Attendance (proportion)                                        |
| Other gynecological diseases             | Female | 15 to 19       | 80 plus | Global     | -1        | Sociodemographic Status                                                      |
| Other gynecological diseases             | Female | 15 to 19       | 80 plus | Global     | 0         | Smoking Prevalence                                                           |
| Other gynecological diseases             | Female | 15 to 19       | 80 plus | Global     | 1         | Live Births 35+ (proportion)                                                 |
| Other gynecological diseases             | Female | 15 to 19       | 80 plus | Global     | 1         | Total Fertility Rate                                                         |
| Other gynecological diseases             | Female | 15 to 19       | 80 plus | Data Rich  | -1        | Education (years per capita)                                                 |
| Other gynecological diseases             | Female | 15 to 19       | 80 plus | Data Rich  | -1        | Health System Access (unitless)                                              |
| Other gynecological diseases             | Female | 15 to 19       | 80 plus | Data Rich  | -1        | LDI (IS per capita)                                                          |
| Other gynecological diseases             | Female | 15 to 19       | 80 plus | Data Rich  | -1        | Skilled Birth Attendance (proportion)                                        |
| Other gynecological diseases             | Female | 15 to 19       | 80 plus | Data Rich  | -1        | Sociodemographic Status                                                      |
| Other gynecological diseases             | Female | 15 to 19       | 80 plus | Data Rich  | 0         | Smoking Prevalence                                                           |
| Other gynecological diseases             | Female | 15 to 19       | 80 plus | Data Rich  | 1         | Live Births 35+ (proportion)                                                 |
| Other gynecological diseases             | Female | 15 to 19       | 80 plus | Data Rich  | 1         | Total Fertility Rate                                                         |
| Hemoglobinopathies and hemolytic anemias | Male   | Early Neonatal | 80 plus | Global     | -1        | Education (years per capita)                                                 |
| Hemoglobinopathies and hemolytic anemias | Male   | Early Neonatal | 80 plus | Global     | -1        | Health System Access (capped)                                                |
| Hemoglobinopathies and hemolytic anemias | Male   | Early Neonatal | 80 plus | Global     | -1        | LDI (IS per capita)                                                          |
| Hemoglobinopathies and hemolytic anemias | Male   | Early Neonatal | 80 plus | Global     | -1        | Latitude Over 45 (proportion)                                                |
| Hemoglobinopathies and hemolytic anemias | Male   | Early Neonatal | 80 plus | Global     | -1        | Sociodemographic Status                                                      |
| Hemoglobinopathies and hemolytic anemias | Male   | Early Neonatal | 80 plus | Global     | 0         | Latitude 30 to 45 (proportion)                                               |
| Hemoglobinopathies and hemolytic anemias | Male   | Early Neonatal | 80 plus | Global     | 1         | Hemoglobinopathies Prevalence x Excess Mortality                             |
| Hemoglobinopathies and hemolytic anemias | Male   | Early Neonatal | 80 plus | Global     | 1         | Hemoglobinopathies Prevalence x Excess Mortality (excluding G6PD deficiency) |
| Hemoglobinopathies and hemolytic anemias | Male   | Early Neonatal | 80 plus | Global     | 1         | Latitude 15 to 30 (proportion)                                               |
| Hemoglobinopathies and hemolytic anemias | Male   | Early Neonatal | 80 plus | Global     | 1         | Latitude Under 15 (proportion)                                               |
| Hemoglobinopathies and hemolytic anemias | Male   | Early Neonatal | 80 plus | Data Rich  | -1        | Education (years per capita)                                                 |
| Hemoglobinopathies and hemolytic anemias | Male   | Early Neonatal | 80 plus | Data Rich  | -1        | Health System Access (capped)                                                |
| Hemoglobinopathies and hemolytic anemias | Male   | Early Neonatal | 80 plus | Data Rich  | -1        | LDI (IS per capita)                                                          |
| Hemoglobinopathies and hemolytic anemias | Male   | Early Neonatal | 80 plus | Data Rich  | -1        | Latitude Over 45 (proportion)                                                |
| Hemoglobinopathies and hemolytic anemias | Male   | Early Neonatal | 80 plus | Data Rich  | -1        | Sociodemographic Status                                                      |
| Hemoglobinopathies and hemolytic anemias | Male   | Early Neonatal | 80 plus | Data Rich  | 0         | Latitude 30 to 45 (proportion)                                               |
| Hemoglobinopathies and hemolytic anemias | Male   | Early Neonatal | 80 plus | Data Rich  | 1         | Hemoglobinopathies Prevalence x Excess Mortality                             |
| Hemoglobinopathies and hemolytic anemias | Male   | Early Neonatal | 80 plus | Data Rich  | 1         | Hemoglobinopathies Prevalence x Excess Mortality (excluding G6PD deficiency) |
| Hemoglobinopathies and hemolytic anemias | Male   | Early Neonatal | 80 plus | Data Rich  | 1         | Latitude 15 to 30 (proportion)                                               |
| Hemoglobinopathies and hemolytic anemias | Male   | Early Neonatal | 80 plus | Data Rich  | 1         | Latitude Under 15 (proportion)                                               |
| Hemoglobinopathies and hemolytic anemias | Female | Early Neonatal | 80 plus | Global     | -1        | Education (years per capita)                                                 |
| Hemoglobinopathies and hemolytic anemias | Female | Early Neonatal | 80 plus | Global     | -1        | Health System Access (capped)                                                |
| Hemoglobinopathies and hemolytic anemias | Female | Early Neonatal | 80 plus | Global     | -1        | LDI (IS per capita)                                                          |
| Hemoglobinopathies and hemolytic anemias | Female | Early Neonatal | 80 plus | Global     | -1        | Latitude Over 45 (proportion)                                                |
| Hemoglobinopathies and hemolytic anemias | Female | Early Neonatal | 80 plus | Global     | -1        | Sociodemographic Status                                                      |
| Hemoglobinopathies and hemolytic anemias | Female | Early Neonatal | 80 plus | Global     | 0         | Latitude 30 to 45 (proportion)                                               |
| Hemoglobinopathies and hemolytic anemias | Female | Early Neonatal | 80 plus | Global     | 1         | Hemoglobinopathies Prevalence x Excess Mortality                             |

**Appendix Table 10: CODEm covariates used, level of covariate, and expected direction of covariate by cause, sex, and age**

| Cause                                             | Sex    | Age start      | Age end | Model type | Direction | Covariate                                                                    |
|---------------------------------------------------|--------|----------------|---------|------------|-----------|------------------------------------------------------------------------------|
| Hemoglobinopathies and hemolytic anemias          | Female | Early Neonatal | 80 plus | Global     | 1         | Hemoglobinopathies Prevalence x Excess Mortality (excluding G6PD deficiency) |
| Hemoglobinopathies and hemolytic anemias          | Female | Early Neonatal | 80 plus | Global     | 1         | Latitude 15 to 30 (proportion)                                               |
| Hemoglobinopathies and hemolytic anemias          | Female | Early Neonatal | 80 plus | Global     | 1         | Latitude Under 15 (proportion)                                               |
| Hemoglobinopathies and hemolytic anemias          | Female | Early Neonatal | 80 plus | Data Rich  | -1        | Education (years per capita)                                                 |
| Hemoglobinopathies and hemolytic anemias          | Female | Early Neonatal | 80 plus | Data Rich  | -1        | Health System Access (capped)                                                |
| Hemoglobinopathies and hemolytic anemias          | Female | Early Neonatal | 80 plus | Data Rich  | -1        | LDI (IS per capita)                                                          |
| Hemoglobinopathies and hemolytic anemias          | Female | Early Neonatal | 80 plus | Data Rich  | -1        | Latitude Over 45 (proportion)                                                |
| Hemoglobinopathies and hemolytic anemias          | Female | Early Neonatal | 80 plus | Data Rich  | -1        | Sociodemographic Status                                                      |
| Hemoglobinopathies and hemolytic anemias          | Female | Early Neonatal | 80 plus | Data Rich  | 0         | Latitude 30 to 45 (proportion)                                               |
| Hemoglobinopathies and hemolytic anemias          | Female | Early Neonatal | 80 plus | Data Rich  | 1         | Hemoglobinopathies Prevalence x Excess Mortality                             |
| Hemoglobinopathies and hemolytic anemias          | Female | Early Neonatal | 80 plus | Data Rich  | 1         | Hemoglobinopathies Prevalence x Excess Mortality (excluding G6PD deficiency) |
| Hemoglobinopathies and hemolytic anemias          | Female | Early Neonatal | 80 plus | Data Rich  | 1         | Latitude 15 to 30 (proportion)                                               |
| Hemoglobinopathies and hemolytic anemias          | Female | Early Neonatal | 80 plus | Data Rich  | 1         | Latitude Under 15 (proportion)                                               |
| Endocrine, metabolic, blood, and immune disorders | Male   | Early Neonatal | 80 plus | Global     | -1        | Education (years per capita)                                                 |
| Endocrine, metabolic, blood, and immune disorders | Male   | Early Neonatal | 80 plus | Global     | -1        | Health System Access 2 (unitless)                                            |
| Endocrine, metabolic, blood, and immune disorders | Male   | Early Neonatal | 80 plus | Global     | -1        | LDI (IS per capita)                                                          |
| Endocrine, metabolic, blood, and immune disorders | Male   | Early Neonatal | 80 plus | Global     | 0         | Sociodemographic Status                                                      |
| Endocrine, metabolic, blood, and immune disorders | Male   | Early Neonatal | 80 plus | Global     | 1         | Alcohol (litres per capita)                                                  |
| Endocrine, metabolic, blood, and immune disorders | Male   | Early Neonatal | 80 plus | Global     | 1         | Animal Fats (kcal per capita)                                                |
| Endocrine, metabolic, blood, and immune disorders | Male   | Early Neonatal | 80 plus | Global     | 1         | Cholesterol (total, mean per capita)                                         |
| Endocrine, metabolic, blood, and immune disorders | Male   | Early Neonatal | 80 plus | Global     | 1         | Mean BMI                                                                     |
| Endocrine, metabolic, blood, and immune disorders | Male   | Early Neonatal | 80 plus | Global     | 1         | Total Calories (kcal per capita)                                             |
| Endocrine, metabolic, blood, and immune disorders | Male   | Early Neonatal | 80 plus | Data Rich  | -1        | Education (years per capita)                                                 |
| Endocrine, metabolic, blood, and immune disorders | Male   | Early Neonatal | 80 plus | Data Rich  | -1        | Health System Access 2 (unitless)                                            |
| Endocrine, metabolic, blood, and immune disorders | Male   | Early Neonatal | 80 plus | Data Rich  | -1        | LDI (IS per capita)                                                          |
| Endocrine, metabolic, blood, and immune disorders | Male   | Early Neonatal | 80 plus | Data Rich  | 0         | Sociodemographic Status                                                      |
| Endocrine, metabolic, blood, and immune disorders | Male   | Early Neonatal | 80 plus | Data Rich  | 1         | Alcohol (litres per capita)                                                  |
| Endocrine, metabolic, blood, and immune disorders | Male   | Early Neonatal | 80 plus | Data Rich  | 1         | Animal Fats (kcal per capita)                                                |
| Endocrine, metabolic, blood, and immune disorders | Male   | Early Neonatal | 80 plus | Data Rich  | 1         | Cholesterol (total, mean per capita)                                         |
| Endocrine, metabolic, blood, and immune disorders | Male   | Early Neonatal | 80 plus | Data Rich  | 1         | Mean BMI                                                                     |
| Endocrine, metabolic, blood, and immune disorders | Male   | Early Neonatal | 80 plus | Data Rich  | 1         | Total Calories (kcal per capita)                                             |
| Endocrine, metabolic, blood, and immune disorders | Female | Early Neonatal | 80 plus | Global     | -1        | Education (years per capita)                                                 |
| Endocrine, metabolic, blood, and immune disorders | Female | Early Neonatal | 80 plus | Global     | -1        | Health System Access 2 (unitless)                                            |
| Endocrine, metabolic, blood, and immune disorders | Female | Early Neonatal | 80 plus | Global     | -1        | LDI (IS per capita)                                                          |
| Endocrine, metabolic, blood, and immune disorders | Female | Early Neonatal | 80 plus | Global     | 0         | Sociodemographic Status                                                      |
| Endocrine, metabolic, blood, and immune disorders | Female | Early Neonatal | 80 plus | Global     | 1         | Alcohol (litres per capita)                                                  |
| Endocrine, metabolic, blood, and immune disorders | Female | Early Neonatal | 80 plus | Global     | 1         | Animal Fats (kcal per capita)                                                |
| Endocrine, metabolic, blood, and immune disorders | Female | Early Neonatal | 80 plus | Global     | 1         | Cholesterol (total, mean per capita)                                         |
| Endocrine, metabolic, blood, and immune disorders | Female | Early Neonatal | 80 plus | Global     | 1         | Mean BMI                                                                     |
| Endocrine, metabolic, blood, and immune disorders | Female | Early Neonatal | 80 plus | Global     | 1         | Total Calories (kcal per capita)                                             |
| Endocrine, metabolic, blood, and immune disorders | Female | Early Neonatal | 80 plus | Data Rich  | -1        | Education (years per capita)                                                 |
| Endocrine, metabolic, blood, and immune disorders | Female | Early Neonatal | 80 plus | Data Rich  | -1        | Health System Access 2 (unitless)                                            |
| Endocrine, metabolic, blood, and immune disorders | Female | Early Neonatal | 80 plus | Data Rich  | -1        | LDI (IS per capita)                                                          |
| Endocrine, metabolic, blood, and immune disorders | Female | Early Neonatal | 80 plus | Data Rich  | 0         | Sociodemographic Status                                                      |

**Appendix Table 10: CODEm covariates used, level of covariate, and expected direction of covariate by cause, sex, and age**

| Cause                                             | Sex    | Age start      | Age end | Model type | Direction | Covariate                            |
|---------------------------------------------------|--------|----------------|---------|------------|-----------|--------------------------------------|
| Endocrine, metabolic, blood, and immune disorders | Female | Early Neonatal | 80 plus | Data Rich  | 1         | Alcohol (litres per capita)          |
| Endocrine, metabolic, blood, and immune disorders | Female | Early Neonatal | 80 plus | Data Rich  | 1         | Animal Fats (kcal per capita)        |
| Endocrine, metabolic, blood, and immune disorders | Female | Early Neonatal | 80 plus | Data Rich  | 1         | Cholesterol (total, mean per capita) |
| Endocrine, metabolic, blood, and immune disorders | Female | Early Neonatal | 80 plus | Data Rich  | 1         | Mean BMI                             |
| Endocrine, metabolic, blood, and immune disorders | Female | Early Neonatal | 80 plus | Data Rich  | 1         | Total Calories (kcal per capita)     |
| Musculoskeletal disorders                         | Male   | 5 to 9         | 80 plus | Global     | -1        | Health System Access 2 (unitless)    |
| Musculoskeletal disorders                         | Male   | 5 to 9         | 80 plus | Global     | 0         | Education (years per capita)         |
| Musculoskeletal disorders                         | Male   | 5 to 9         | 80 plus | Global     | 0         | LDI (IS per capita)                  |
| Musculoskeletal disorders                         | Male   | 5 to 9         | 80 plus | Global     | 0         | Sociodemographic Status              |
| Musculoskeletal disorders                         | Male   | 5 to 9         | 80 plus | Global     | 0         | Vegetables (kcal per capita)         |
| Musculoskeletal disorders                         | Male   | 5 to 9         | 80 plus | Global     | 1         | Alcohol (litres per capita)          |
| Musculoskeletal disorders                         | Male   | 5 to 9         | 80 plus | Global     | 1         | Cholesterol (total, mean per capita) |
| Musculoskeletal disorders                         | Male   | 5 to 9         | 80 plus | Global     | 1         | Cumulative Cigarettes (10 Years)     |
| Musculoskeletal disorders                         | Male   | 5 to 9         | 80 plus | Global     | 1         | Cumulative Cigarettes (5 Years)      |
| Musculoskeletal disorders                         | Male   | 5 to 9         | 80 plus | Global     | 1         | Mean BMI                             |
| Musculoskeletal disorders                         | Male   | 5 to 9         | 80 plus | Global     | 1         | Smoking Prevalence                   |
| Musculoskeletal disorders                         | Male   | 5 to 9         | 80 plus | Data Rich  | -1        | Health System Access 2 (unitless)    |
| Musculoskeletal disorders                         | Male   | 5 to 9         | 80 plus | Data Rich  | 0         | Education (years per capita)         |
| Musculoskeletal disorders                         | Male   | 5 to 9         | 80 plus | Data Rich  | 0         | LDI (IS per capita)                  |
| Musculoskeletal disorders                         | Male   | 5 to 9         | 80 plus | Data Rich  | 0         | Sociodemographic Status              |
| Musculoskeletal disorders                         | Male   | 5 to 9         | 80 plus | Data Rich  | 0         | Vegetables (kcal per capita)         |
| Musculoskeletal disorders                         | Male   | 5 to 9         | 80 plus | Data Rich  | 1         | Alcohol (litres per capita)          |
| Musculoskeletal disorders                         | Male   | 5 to 9         | 80 plus | Data Rich  | 1         | Cholesterol (total, mean per capita) |
| Musculoskeletal disorders                         | Male   | 5 to 9         | 80 plus | Data Rich  | 1         | Cumulative Cigarettes (10 Years)     |
| Musculoskeletal disorders                         | Male   | 5 to 9         | 80 plus | Data Rich  | 1         | Cumulative Cigarettes (5 Years)      |
| Musculoskeletal disorders                         | Male   | 5 to 9         | 80 plus | Data Rich  | 1         | Mean BMI                             |
| Musculoskeletal disorders                         | Male   | 5 to 9         | 80 plus | Data Rich  | 1         | Smoking Prevalence                   |
| Musculoskeletal disorders                         | Female | 5 to 9         | 80 plus | Global     | -1        | Health System Access 2 (unitless)    |
| Musculoskeletal disorders                         | Female | 5 to 9         | 80 plus | Global     | 0         | Education (years per capita)         |
| Musculoskeletal disorders                         | Female | 5 to 9         | 80 plus | Global     | 0         | LDI (IS per capita)                  |
| Musculoskeletal disorders                         | Female | 5 to 9         | 80 plus | Global     | 0         | Sociodemographic Status              |
| Musculoskeletal disorders                         | Female | 5 to 9         | 80 plus | Global     | 0         | Vegetables (kcal per capita)         |
| Musculoskeletal disorders                         | Female | 5 to 9         | 80 plus | Global     | 1         | Alcohol (litres per capita)          |
| Musculoskeletal disorders                         | Female | 5 to 9         | 80 plus | Global     | 1         | Cholesterol (total, mean per capita) |
| Musculoskeletal disorders                         | Female | 5 to 9         | 80 plus | Global     | 1         | Cumulative Cigarettes (10 Years)     |
| Musculoskeletal disorders                         | Female | 5 to 9         | 80 plus | Global     | 1         | Cumulative Cigarettes (5 Years)      |
| Musculoskeletal disorders                         | Female | 5 to 9         | 80 plus | Global     | 1         | Mean BMI                             |
| Musculoskeletal disorders                         | Female | 5 to 9         | 80 plus | Global     | 1         | Smoking Prevalence                   |
| Musculoskeletal disorders                         | Female | 5 to 9         | 80 plus | Data Rich  | -1        | Health System Access 2 (unitless)    |
| Musculoskeletal disorders                         | Female | 5 to 9         | 80 plus | Data Rich  | 0         | Education (years per capita)         |
| Musculoskeletal disorders                         | Female | 5 to 9         | 80 plus | Data Rich  | 0         | LDI (IS per capita)                  |
| Musculoskeletal disorders                         | Female | 5 to 9         | 80 plus | Data Rich  | 0         | Sociodemographic Status              |
| Musculoskeletal disorders                         | Female | 5 to 9         | 80 plus | Data Rich  | 0         | Vegetables (kcal per capita)         |
| Musculoskeletal disorders                         | Female | 5 to 9         | 80 plus | Data Rich  | 1         | Alcohol (litres per capita)          |

**Appendix Table 10: CODEm covariates used, level of covariate, and expected direction of covariate by cause, sex, and age**

| Cause                     | Sex    | Age start | Age end | Model type | Direction | Covariate                            |
|---------------------------|--------|-----------|---------|------------|-----------|--------------------------------------|
| Musculoskeletal disorders | Female | 5 to 9    | 80 plus | Data Rich  | 1         | Cholesterol (total, mean per capita) |
| Musculoskeletal disorders | Female | 5 to 9    | 80 plus | Data Rich  | 1         | Cumulative Cigarettes (10 Years)     |
| Musculoskeletal disorders | Female | 5 to 9    | 80 plus | Data Rich  | 1         | Cumulative Cigarettes (5 Years)      |
| Musculoskeletal disorders | Female | 5 to 9    | 80 plus | Data Rich  | 1         | Mean BMI                             |
| Musculoskeletal disorders | Female | 5 to 9    | 80 plus | Data Rich  | 1         | Smoking Prevalence                   |
| Rheumatoid arthritis      | Male   | 5 to 9    | 80 plus | Global     | -1        | Education (years per capita)         |
| Rheumatoid arthritis      | Male   | 5 to 9    | 80 plus | Global     | -1        | Health System Access 2 (unitless)    |
| Rheumatoid arthritis      | Male   | 5 to 9    | 80 plus | Global     | -1        | LDI (IS per capita)                  |
| Rheumatoid arthritis      | Male   | 5 to 9    | 80 plus | Global     | 0         | Sociodemographic Status              |
| Rheumatoid arthritis      | Male   | 5 to 9    | 80 plus | Global     | 0         | Vegetables (kcal per capita)         |
| Rheumatoid arthritis      | Male   | 5 to 9    | 80 plus | Global     | 1         | Alcohol (litres per capita)          |
| Rheumatoid arthritis      | Male   | 5 to 9    | 80 plus | Global     | 1         | Cholesterol (total, mean per capita) |
| Rheumatoid arthritis      | Male   | 5 to 9    | 80 plus | Global     | 1         | Cumulative Cigarettes (10 Years)     |
| Rheumatoid arthritis      | Male   | 5 to 9    | 80 plus | Global     | 1         | Cumulative Cigarettes (5 Years)      |
| Rheumatoid arthritis      | Male   | 5 to 9    | 80 plus | Global     | 1         | Mean BMI                             |
| Rheumatoid arthritis      | Male   | 5 to 9    | 80 plus | Global     | 1         | Smoking Prevalence                   |
| Rheumatoid arthritis      | Male   | 5 to 9    | 80 plus | Data Rich  | -1        | Education (years per capita)         |
| Rheumatoid arthritis      | Male   | 5 to 9    | 80 plus | Data Rich  | -1        | Health System Access 2 (unitless)    |
| Rheumatoid arthritis      | Male   | 5 to 9    | 80 plus | Data Rich  | -1        | LDI (IS per capita)                  |
| Rheumatoid arthritis      | Male   | 5 to 9    | 80 plus | Data Rich  | 0         | Sociodemographic Status              |
| Rheumatoid arthritis      | Male   | 5 to 9    | 80 plus | Data Rich  | 0         | Vegetables (kcal per capita)         |
| Rheumatoid arthritis      | Male   | 5 to 9    | 80 plus | Data Rich  | 1         | Alcohol (litres per capita)          |
| Rheumatoid arthritis      | Male   | 5 to 9    | 80 plus | Data Rich  | 1         | Cholesterol (total, mean per capita) |
| Rheumatoid arthritis      | Male   | 5 to 9    | 80 plus | Data Rich  | 1         | Cumulative Cigarettes (10 Years)     |
| Rheumatoid arthritis      | Male   | 5 to 9    | 80 plus | Data Rich  | 1         | Cumulative Cigarettes (5 Years)      |
| Rheumatoid arthritis      | Male   | 5 to 9    | 80 plus | Data Rich  | 1         | Mean BMI                             |
| Rheumatoid arthritis      | Male   | 5 to 9    | 80 plus | Data Rich  | 1         | Smoking Prevalence                   |
| Rheumatoid arthritis      | Female | 5 to 9    | 80 plus | Global     | -1        | Education (years per capita)         |
| Rheumatoid arthritis      | Female | 5 to 9    | 80 plus | Global     | -1        | Health System Access 2 (unitless)    |
| Rheumatoid arthritis      | Female | 5 to 9    | 80 plus | Global     | -1        | LDI (IS per capita)                  |
| Rheumatoid arthritis      | Female | 5 to 9    | 80 plus | Global     | 0         | Sociodemographic Status              |
| Rheumatoid arthritis      | Female | 5 to 9    | 80 plus | Global     | 0         | Vegetables (kcal per capita)         |
| Rheumatoid arthritis      | Female | 5 to 9    | 80 plus | Global     | 1         | Alcohol (litres per capita)          |
| Rheumatoid arthritis      | Female | 5 to 9    | 80 plus | Global     | 1         | Cholesterol (total, mean per capita) |
| Rheumatoid arthritis      | Female | 5 to 9    | 80 plus | Global     | 1         | Cumulative Cigarettes (10 Years)     |
| Rheumatoid arthritis      | Female | 5 to 9    | 80 plus | Global     | 1         | Cumulative Cigarettes (5 Years)      |
| Rheumatoid arthritis      | Female | 5 to 9    | 80 plus | Global     | 1         | Mean BMI                             |
| Rheumatoid arthritis      | Female | 5 to 9    | 80 plus | Global     | 1         | Smoking Prevalence                   |
| Rheumatoid arthritis      | Female | 5 to 9    | 80 plus | Data Rich  | -1        | Education (years per capita)         |
| Rheumatoid arthritis      | Female | 5 to 9    | 80 plus | Data Rich  | -1        | Health System Access 2 (unitless)    |
| Rheumatoid arthritis      | Female | 5 to 9    | 80 plus | Data Rich  | -1        | LDI (IS per capita)                  |
| Rheumatoid arthritis      | Female | 5 to 9    | 80 plus | Data Rich  | 0         | Sociodemographic Status              |
| Rheumatoid arthritis      | Female | 5 to 9    | 80 plus | Data Rich  | 0         | Vegetables (kcal per capita)         |
| Rheumatoid arthritis      | Female | 5 to 9    | 80 plus | Data Rich  | 1         | Alcohol (litres per capita)          |

**Appendix Table 10: CODEm covariates used, level of covariate, and expected direction of covariate by cause, sex, and age**

| Cause                           | Sex    | Age start | Age end | Model type | Direction | Covariate                            |
|---------------------------------|--------|-----------|---------|------------|-----------|--------------------------------------|
| Rheumatoid arthritis            | Female | 5 to 9    | 80 plus | Data Rich  | 1         | Cholesterol (total, mean per capita) |
| Rheumatoid arthritis            | Female | 5 to 9    | 80 plus | Data Rich  | 1         | Cumulative Cigarettes (10 Years)     |
| Rheumatoid arthritis            | Female | 5 to 9    | 80 plus | Data Rich  | 1         | Cumulative Cigarettes (5 Years)      |
| Rheumatoid arthritis            | Female | 5 to 9    | 80 plus | Data Rich  | 1         | Mean BMI                             |
| Rheumatoid arthritis            | Female | 5 to 9    | 80 plus | Data Rich  | 1         | Smoking Prevalence                   |
| Other musculoskeletal disorders | Male   | 5 to 9    | 80 plus | Global     | -1        | Health System Access 2 (unitless)    |
| Other musculoskeletal disorders | Male   | 5 to 9    | 80 plus | Global     | 0         | Education (years per capita)         |
| Other musculoskeletal disorders | Male   | 5 to 9    | 80 plus | Global     | 0         | LDI (I\$ per capita)                 |
| Other musculoskeletal disorders | Male   | 5 to 9    | 80 plus | Global     | 0         | Sociodemographic Status              |
| Other musculoskeletal disorders | Male   | 5 to 9    | 80 plus | Global     | 0         | Vegetables (kcal per capita)         |
| Other musculoskeletal disorders | Male   | 5 to 9    | 80 plus | Global     | 1         | Alcohol (litres per capita)          |
| Other musculoskeletal disorders | Male   | 5 to 9    | 80 plus | Global     | 1         | Cholesterol (total, mean per capita) |
| Other musculoskeletal disorders | Male   | 5 to 9    | 80 plus | Global     | 1         | Cumulative Cigarettes (10 Years)     |
| Other musculoskeletal disorders | Male   | 5 to 9    | 80 plus | Global     | 1         | Cumulative Cigarettes (5 Years)      |
| Other musculoskeletal disorders | Male   | 5 to 9    | 80 plus | Global     | 1         | Mean BMI                             |
| Other musculoskeletal disorders | Male   | 5 to 9    | 80 plus | Global     | 1         | Smoking Prevalence                   |
| Other musculoskeletal disorders | Male   | 5 to 9    | 80 plus | Data Rich  | -1        | Health System Access 2 (unitless)    |
| Other musculoskeletal disorders | Male   | 5 to 9    | 80 plus | Data Rich  | 0         | Education (years per capita)         |
| Other musculoskeletal disorders | Male   | 5 to 9    | 80 plus | Data Rich  | 0         | LDI (I\$ per capita)                 |
| Other musculoskeletal disorders | Male   | 5 to 9    | 80 plus | Data Rich  | 0         | Sociodemographic Status              |
| Other musculoskeletal disorders | Male   | 5 to 9    | 80 plus | Data Rich  | 0         | Vegetables (kcal per capita)         |
| Other musculoskeletal disorders | Male   | 5 to 9    | 80 plus | Data Rich  | 1         | Alcohol (litres per capita)          |
| Other musculoskeletal disorders | Male   | 5 to 9    | 80 plus | Data Rich  | 1         | Cholesterol (total, mean per capita) |
| Other musculoskeletal disorders | Male   | 5 to 9    | 80 plus | Data Rich  | 1         | Cumulative Cigarettes (10 Years)     |
| Other musculoskeletal disorders | Male   | 5 to 9    | 80 plus | Data Rich  | 1         | Cumulative Cigarettes (5 Years)      |
| Other musculoskeletal disorders | Male   | 5 to 9    | 80 plus | Data Rich  | 1         | Mean BMI                             |
| Other musculoskeletal disorders | Male   | 5 to 9    | 80 plus | Data Rich  | 1         | Smoking Prevalence                   |
| Other musculoskeletal disorders | Female | 5 to 9    | 80 plus | Global     | -1        | Health System Access 2 (unitless)    |
| Other musculoskeletal disorders | Female | 5 to 9    | 80 plus | Global     | 0         | Education (years per capita)         |
| Other musculoskeletal disorders | Female | 5 to 9    | 80 plus | Global     | 0         | LDI (I\$ per capita)                 |
| Other musculoskeletal disorders | Female | 5 to 9    | 80 plus | Global     | 0         | Sociodemographic Status              |
| Other musculoskeletal disorders | Female | 5 to 9    | 80 plus | Global     | 0         | Vegetables (kcal per capita)         |
| Other musculoskeletal disorders | Female | 5 to 9    | 80 plus | Global     | 1         | Alcohol (litres per capita)          |
| Other musculoskeletal disorders | Female | 5 to 9    | 80 plus | Global     | 1         | Cholesterol (total, mean per capita) |
| Other musculoskeletal disorders | Female | 5 to 9    | 80 plus | Global     | 1         | Cumulative Cigarettes (10 Years)     |
| Other musculoskeletal disorders | Female | 5 to 9    | 80 plus | Global     | 1         | Cumulative Cigarettes (5 Years)      |
| Other musculoskeletal disorders | Female | 5 to 9    | 80 plus | Global     | 1         | Mean BMI                             |
| Other musculoskeletal disorders | Female | 5 to 9    | 80 plus | Global     | 1         | Smoking Prevalence                   |
| Other musculoskeletal disorders | Female | 5 to 9    | 80 plus | Data Rich  | -1        | Health System Access 2 (unitless)    |
| Other musculoskeletal disorders | Female | 5 to 9    | 80 plus | Data Rich  | 0         | Education (years per capita)         |
| Other musculoskeletal disorders | Female | 5 to 9    | 80 plus | Data Rich  | 0         | LDI (I\$ per capita)                 |
| Other musculoskeletal disorders | Female | 5 to 9    | 80 plus | Data Rich  | 0         | Sociodemographic Status              |
| Other musculoskeletal disorders | Female | 5 to 9    | 80 plus | Data Rich  | 0         | Vegetables (kcal per capita)         |
| Other musculoskeletal disorders | Female | 5 to 9    | 80 plus | Data Rich  | 1         | Alcohol (litres per capita)          |

**Appendix Table 10: CODEm covariates used, level of covariate, and expected direction of covariate by cause, sex, and age**

| Cause                           | Sex    | Age start      | Age end | Model type | Direction | Covariate                                          |
|---------------------------------|--------|----------------|---------|------------|-----------|----------------------------------------------------|
| Other musculoskeletal disorders | Female | 5 to 9         | 80 plus | Data Rich  | 1         | Cholesterol (total, mean per capita)               |
| Other musculoskeletal disorders | Female | 5 to 9         | 80 plus | Data Rich  | 1         | Cumulative Cigarettes (10 Years)                   |
| Other musculoskeletal disorders | Female | 5 to 9         | 80 plus | Data Rich  | 1         | Cumulative Cigarettes (5 Years)                    |
| Other musculoskeletal disorders | Female | 5 to 9         | 80 plus | Data Rich  | 1         | Mean BMI                                           |
| Other musculoskeletal disorders | Female | 5 to 9         | 80 plus | Data Rich  | 1         | Smoking Prevalence                                 |
| Congenital anomalies            | Male   | Early Neonatal | 80 plus | Global     | -1        | Education (years per capita)                       |
| Congenital anomalies            | Male   | Early Neonatal | 80 plus | Global     | -1        | Fruits (kcal per capita)                           |
| Congenital anomalies            | Male   | Early Neonatal | 80 plus | Global     | -1        | LDI (IS per capita)                                |
| Congenital anomalies            | Male   | Early Neonatal | 80 plus | Global     | -1        | Legality of Abortion                               |
| Congenital anomalies            | Male   | Early Neonatal | 80 plus | Global     | -1        | Sociodemographic Status                            |
| Congenital anomalies            | Male   | Early Neonatal | 80 plus | Global     | -1        | Vegetables (kcal per capita)                       |
| Congenital anomalies            | Male   | Early Neonatal | 80 plus | Global     | 0         | Health System Access (capped)                      |
| Congenital anomalies            | Male   | Early Neonatal | 80 plus | Global     | 1         | Alcohol (litres per capita)                        |
| Congenital anomalies            | Male   | Early Neonatal | 80 plus | Global     | 1         | Indoor Air Pollution (All Cooking Fuels)           |
| Congenital anomalies            | Male   | Early Neonatal | 80 plus | Global     | 1         | Live Births 35+ (proportion)                       |
| Congenital anomalies            | Male   | Early Neonatal | 80 plus | Global     | 1         | Smoking Prevalence (Reproductive Age Standardised) |
| Congenital anomalies            | Male   | Early Neonatal | 80 plus | Data Rich  | -1        | Education (years per capita)                       |
| Congenital anomalies            | Male   | Early Neonatal | 80 plus | Data Rich  | -1        | Fruits (kcal per capita)                           |
| Congenital anomalies            | Male   | Early Neonatal | 80 plus | Data Rich  | -1        | LDI (IS per capita)                                |
| Congenital anomalies            | Male   | Early Neonatal | 80 plus | Data Rich  | -1        | Legality of Abortion                               |
| Congenital anomalies            | Male   | Early Neonatal | 80 plus | Data Rich  | -1        | Sociodemographic Status                            |
| Congenital anomalies            | Male   | Early Neonatal | 80 plus | Data Rich  | -1        | Vegetables (kcal per capita)                       |
| Congenital anomalies            | Male   | Early Neonatal | 80 plus | Data Rich  | 0         | Health System Access (capped)                      |
| Congenital anomalies            | Male   | Early Neonatal | 80 plus | Data Rich  | 1         | Alcohol (litres per capita)                        |
| Congenital anomalies            | Male   | Early Neonatal | 80 plus | Data Rich  | 1         | Indoor Air Pollution (All Cooking Fuels)           |
| Congenital anomalies            | Male   | Early Neonatal | 80 plus | Data Rich  | 1         | Live Births 35+ (proportion)                       |
| Congenital anomalies            | Male   | Early Neonatal | 80 plus | Data Rich  | 1         | Smoking Prevalence (Reproductive Age Standardised) |
| Congenital anomalies            | Female | Early Neonatal | 80 plus | Global     | -1        | Education (years per capita)                       |
| Congenital anomalies            | Female | Early Neonatal | 80 plus | Global     | -1        | Fruits (kcal per capita)                           |
| Congenital anomalies            | Female | Early Neonatal | 80 plus | Global     | -1        | LDI (IS per capita)                                |
| Congenital anomalies            | Female | Early Neonatal | 80 plus | Global     | -1        | Legality of Abortion                               |
| Congenital anomalies            | Female | Early Neonatal | 80 plus | Global     | -1        | Sociodemographic Status                            |
| Congenital anomalies            | Female | Early Neonatal | 80 plus | Global     | -1        | Vegetables (kcal per capita)                       |
| Congenital anomalies            | Female | Early Neonatal | 80 plus | Global     | 0         | Health System Access (capped)                      |
| Congenital anomalies            | Female | Early Neonatal | 80 plus | Global     | 1         | Alcohol (litres per capita)                        |
| Congenital anomalies            | Female | Early Neonatal | 80 plus | Global     | 1         | Indoor Air Pollution (All Cooking Fuels)           |
| Congenital anomalies            | Female | Early Neonatal | 80 plus | Global     | 1         | Live Births 35+ (proportion)                       |
| Congenital anomalies            | Female | Early Neonatal | 80 plus | Global     | 1         | Smoking Prevalence (Reproductive Age Standardised) |
| Congenital anomalies            | Female | Early Neonatal | 80 plus | Data Rich  | -1        | Education (years per capita)                       |
| Congenital anomalies            | Female | Early Neonatal | 80 plus | Data Rich  | -1        | Fruits (kcal per capita)                           |
| Congenital anomalies            | Female | Early Neonatal | 80 plus | Data Rich  | -1        | LDI (IS per capita)                                |
| Congenital anomalies            | Female | Early Neonatal | 80 plus | Data Rich  | -1        | Legality of Abortion                               |
| Congenital anomalies            | Female | Early Neonatal | 80 plus | Data Rich  | -1        | Sociodemographic Status                            |
| Congenital anomalies            | Female | Early Neonatal | 80 plus | Data Rich  | -1        | Vegetables (kcal per capita)                       |

**Appendix Table 10: CODEm covariates used, level of covariate, and expected direction of covariate by cause, sex, and age**

| Cause                | Sex    | Age start      | Age end | Model type | Direction | Covariate                                          |
|----------------------|--------|----------------|---------|------------|-----------|----------------------------------------------------|
| Congenital anomalies | Female | Early Neonatal | 80 plus | Data Rich  | 0         | Health System Access (capped)                      |
| Congenital anomalies | Female | Early Neonatal | 80 plus | Data Rich  | 1         | Alcohol (litres per capita)                        |
| Congenital anomalies | Female | Early Neonatal | 80 plus | Data Rich  | 1         | Indoor Air Pollution (All Cooking Fuels)           |
| Congenital anomalies | Female | Early Neonatal | 80 plus | Data Rich  | 1         | Live Births 35+ (proportion)                       |
| Congenital anomalies | Female | Early Neonatal | 80 plus | Data Rich  | 1         | Smoking Prevalence (Reproductive Age Standardised) |
| Neural tube defects  | Male   | Early Neonatal | 80 plus | Global     | -1        | Education (years per capita)                       |
| Neural tube defects  | Male   | Early Neonatal | 80 plus | Global     | -1        | Fruits (kcal per capita)                           |
| Neural tube defects  | Male   | Early Neonatal | 80 plus | Global     | -1        | Health System Access 2 (unitless)                  |
| Neural tube defects  | Male   | Early Neonatal | 80 plus | Global     | -1        | LDI (IS per capita)                                |
| Neural tube defects  | Male   | Early Neonatal | 80 plus | Global     | -1        | Sociodemographic Status                            |
| Neural tube defects  | Male   | Early Neonatal | 80 plus | Global     | -1        | Vegetables (kcal per capita)                       |
| Neural tube defects  | Male   | Early Neonatal | 80 plus | Global     | 1         | Alcohol (litres per capita)                        |
| Neural tube defects  | Male   | Early Neonatal | 80 plus | Global     | 1         | Diabetes Age-Standardised Prevalence (proportion)  |
| Neural tube defects  | Male   | Early Neonatal | 80 plus | Global     | 1         | Indoor Air Pollution (All Cooking Fuels)           |
| Neural tube defects  | Male   | Early Neonatal | 80 plus | Global     | 1         | Smoking Prevalence (Reproductive Age Standardised) |
| Neural tube defects  | Male   | Early Neonatal | 80 plus | Data Rich  | -1        | Education (years per capita)                       |
| Neural tube defects  | Male   | Early Neonatal | 80 plus | Data Rich  | -1        | Fruits (kcal per capita)                           |
| Neural tube defects  | Male   | Early Neonatal | 80 plus | Data Rich  | -1        | Health System Access 2 (unitless)                  |
| Neural tube defects  | Male   | Early Neonatal | 80 plus | Data Rich  | -1        | LDI (IS per capita)                                |
| Neural tube defects  | Male   | Early Neonatal | 80 plus | Data Rich  | -1        | Sociodemographic Status                            |
| Neural tube defects  | Male   | Early Neonatal | 80 plus | Data Rich  | -1        | Vegetables (kcal per capita)                       |
| Neural tube defects  | Male   | Early Neonatal | 80 plus | Data Rich  | 1         | Alcohol (litres per capita)                        |
| Neural tube defects  | Male   | Early Neonatal | 80 plus | Data Rich  | 1         | Diabetes Age-Standardised Prevalence (proportion)  |
| Neural tube defects  | Male   | Early Neonatal | 80 plus | Data Rich  | 1         | Indoor Air Pollution (All Cooking Fuels)           |
| Neural tube defects  | Male   | Early Neonatal | 80 plus | Data Rich  | 1         | Smoking Prevalence (Reproductive Age Standardised) |
| Neural tube defects  | Female | Early Neonatal | 80 plus | Global     | -1        | Education (years per capita)                       |
| Neural tube defects  | Female | Early Neonatal | 80 plus | Global     | -1        | Fruits (kcal per capita)                           |
| Neural tube defects  | Female | Early Neonatal | 80 plus | Global     | -1        | Health System Access 2 (unitless)                  |
| Neural tube defects  | Female | Early Neonatal | 80 plus | Global     | -1        | LDI (IS per capita)                                |
| Neural tube defects  | Female | Early Neonatal | 80 plus | Global     | -1        | Sociodemographic Status                            |
| Neural tube defects  | Female | Early Neonatal | 80 plus | Global     | -1        | Vegetables (kcal per capita)                       |
| Neural tube defects  | Female | Early Neonatal | 80 plus | Global     | 1         | Alcohol (litres per capita)                        |
| Neural tube defects  | Female | Early Neonatal | 80 plus | Global     | 1         | Diabetes Age-Standardised Prevalence (proportion)  |
| Neural tube defects  | Female | Early Neonatal | 80 plus | Global     | 1         | Indoor Air Pollution (All Cooking Fuels)           |
| Neural tube defects  | Female | Early Neonatal | 80 plus | Global     | 1         | Smoking Prevalence (Reproductive Age Standardised) |
| Neural tube defects  | Female | Early Neonatal | 80 plus | Data Rich  | -1        | Education (years per capita)                       |
| Neural tube defects  | Female | Early Neonatal | 80 plus | Data Rich  | -1        | Fruits (kcal per capita)                           |
| Neural tube defects  | Female | Early Neonatal | 80 plus | Data Rich  | -1        | Health System Access 2 (unitless)                  |
| Neural tube defects  | Female | Early Neonatal | 80 plus | Data Rich  | -1        | LDI (IS per capita)                                |
| Neural tube defects  | Female | Early Neonatal | 80 plus | Data Rich  | -1        | Sociodemographic Status                            |
| Neural tube defects  | Female | Early Neonatal | 80 plus | Data Rich  | -1        | Vegetables (kcal per capita)                       |
| Neural tube defects  | Female | Early Neonatal | 80 plus | Data Rich  | 1         | Alcohol (litres per capita)                        |
| Neural tube defects  | Female | Early Neonatal | 80 plus | Data Rich  | 1         | Diabetes Age-Standardised Prevalence (proportion)  |
| Neural tube defects  | Female | Early Neonatal | 80 plus | Data Rich  | 1         | Indoor Air Pollution (All Cooking Fuels)           |



**Appendix Table 10: CODEm covariates used, level of covariate, and expected direction of covariate by cause, sex, and age**

| Cause                      | Sex    | Age start      | Age end | Model type | Direction | Covariate                                          |
|----------------------------|--------|----------------|---------|------------|-----------|----------------------------------------------------|
| Neural tube defects        | Female | Early Neonatal | 80 plus | Data Rich  | 1         | Smoking Prevalence (Reproductive Age Standardised) |
| Congenital heart anomalies | Male   | Early Neonatal | 80 plus | Global     | -1        | Education (years per capita)                       |
| Congenital heart anomalies | Male   | Early Neonatal | 80 plus | Global     | -1        | Legality of Abortion                               |
| Congenital heart anomalies | Male   | Early Neonatal | 80 plus | Global     | -1        | Measles Vaccine Coverage (proportion)              |
| Congenital heart anomalies | Male   | Early Neonatal | 80 plus | Global     | 0         | LDI (US per capita)                                |
| Congenital heart anomalies | Male   | Early Neonatal | 80 plus | Global     | 0         | Sociodemographic Status                            |
| Congenital heart anomalies | Male   | Early Neonatal | 80 plus | Global     | 1         | Alcohol (litres per capita)                        |
| Congenital heart anomalies | Male   | Early Neonatal | 80 plus | Global     | 1         | Diabetes Age-Standardised Prevalence (proportion)  |
| Congenital heart anomalies | Male   | Early Neonatal | 80 plus | Global     | 1         | Indoor Air Pollution (All Cooking Fuels)           |
| Congenital heart anomalies | Male   | Early Neonatal | 80 plus | Global     | 1         | Live Births 35+ (proportion)                       |
| Congenital heart anomalies | Male   | Early Neonatal | 80 plus | Global     | 1         | Smoking Prevalence (Reproductive Age Standardised) |
| Congenital heart anomalies | Male   | Early Neonatal | 80 plus | Data Rich  | -1        | Education (years per capita)                       |
| Congenital heart anomalies | Male   | Early Neonatal | 80 plus | Data Rich  | -1        | Legality of Abortion                               |
| Congenital heart anomalies | Male   | Early Neonatal | 80 plus | Data Rich  | -1        | Measles Vaccine Coverage (proportion)              |
| Congenital heart anomalies | Male   | Early Neonatal | 80 plus | Data Rich  | 0         | LDI (US per capita)                                |
| Congenital heart anomalies | Male   | Early Neonatal | 80 plus | Data Rich  | 0         | Sociodemographic Status                            |
| Congenital heart anomalies | Male   | Early Neonatal | 80 plus | Data Rich  | 1         | Alcohol (litres per capita)                        |
| Congenital heart anomalies | Male   | Early Neonatal | 80 plus | Data Rich  | 1         | Diabetes Age-Standardised Prevalence (proportion)  |
| Congenital heart anomalies | Male   | Early Neonatal | 80 plus | Data Rich  | 1         | Indoor Air Pollution (All Cooking Fuels)           |
| Congenital heart anomalies | Male   | Early Neonatal | 80 plus | Data Rich  | 1         | Live Births 35+ (proportion)                       |
| Congenital heart anomalies | Male   | Early Neonatal | 80 plus | Data Rich  | 1         | Smoking Prevalence (Reproductive Age Standardised) |
| Congenital heart anomalies | Female | Early Neonatal | 80 plus | Global     | -1        | Education (years per capita)                       |
| Congenital heart anomalies | Female | Early Neonatal | 80 plus | Global     | -1        | Legality of Abortion                               |
| Congenital heart anomalies | Female | Early Neonatal | 80 plus | Global     | -1        | Measles Vaccine Coverage (proportion)              |
| Congenital heart anomalies | Female | Early Neonatal | 80 plus | Global     | 0         | LDI (US per capita)                                |
| Congenital heart anomalies | Female | Early Neonatal | 80 plus | Global     | 0         | Sociodemographic Status                            |
| Congenital heart anomalies | Female | Early Neonatal | 80 plus | Global     | 1         | Alcohol (litres per capita)                        |
| Congenital heart anomalies | Female | Early Neonatal | 80 plus | Global     | 1         | Diabetes Age-Standardised Prevalence (proportion)  |
| Congenital heart anomalies | Female | Early Neonatal | 80 plus | Global     | 1         | Indoor Air Pollution (All Cooking Fuels)           |
| Congenital heart anomalies | Female | Early Neonatal | 80 plus | Global     | 1         | Live Births 35+ (proportion)                       |
| Congenital heart anomalies | Female | Early Neonatal | 80 plus | Global     | 1         | Smoking Prevalence (Reproductive Age Standardised) |
| Congenital heart anomalies | Female | Early Neonatal | 80 plus | Data Rich  | -1        | Education (years per capita)                       |
| Congenital heart anomalies | Female | Early Neonatal | 80 plus | Data Rich  | -1        | Legality of Abortion                               |
| Congenital heart anomalies | Female | Early Neonatal | 80 plus | Data Rich  | -1        | Measles Vaccine Coverage (proportion)              |
| Congenital heart anomalies | Female | Early Neonatal | 80 plus | Data Rich  | 0         | LDI (US per capita)                                |
| Congenital heart anomalies | Female | Early Neonatal | 80 plus | Data Rich  | 0         | Sociodemographic Status                            |
| Congenital heart anomalies | Female | Early Neonatal | 80 plus | Data Rich  | 1         | Alcohol (litres per capita)                        |
| Congenital heart anomalies | Female | Early Neonatal | 80 plus | Data Rich  | 1         | Diabetes Age-Standardised Prevalence (proportion)  |
| Congenital heart anomalies | Female | Early Neonatal | 80 plus | Data Rich  | 1         | Indoor Air Pollution (All Cooking Fuels)           |
| Congenital heart anomalies | Female | Early Neonatal | 80 plus | Data Rich  | 1         | Live Births 35+ (proportion)                       |
| Congenital heart anomalies | Female | Early Neonatal | 80 plus | Data Rich  | 1         | Smoking Prevalence (Reproductive Age Standardised) |
| Cleft lip and cleft palate | Male   | Early Neonatal | 1 to 4  | Global     | -1        | Education (years per capita)                       |
| Cleft lip and cleft palate | Male   | Early Neonatal | 1 to 4  | Global     | -1        | Fruits (kcal per capita)                           |
| Cleft lip and cleft palate | Male   | Early Neonatal | 1 to 4  | Global     | -1        | Health System Access (capped)                      |

**Appendix Table 10: CODEm covariates used, level of covariate, and expected direction of covariate by cause, sex, and age**

| Cause                      | Sex    | Age start      | Age end | Model type | Direction | Covariate                                          |
|----------------------------|--------|----------------|---------|------------|-----------|----------------------------------------------------|
| Cleft lip and cleft palate | Male   | Early Neonatal | 1 to 4  | Global     | -1        | LDI (IS per capita)                                |
| Cleft lip and cleft palate | Male   | Early Neonatal | 1 to 4  | Global     | -1        | Legality of Abortion                               |
| Cleft lip and cleft palate | Male   | Early Neonatal | 1 to 4  | Global     | -1        | Sociodemographic Status                            |
| Cleft lip and cleft palate | Male   | Early Neonatal | 1 to 4  | Global     | -1        | Vegetables (kcal per capita)                       |
| Cleft lip and cleft palate | Male   | Early Neonatal | 1 to 4  | Global     | 1         | Alcohol (litres per capita)                        |
| Cleft lip and cleft palate | Male   | Early Neonatal | 1 to 4  | Global     | 1         | Diabetes Age-Standardised Prevalence (proportion)  |
| Cleft lip and cleft palate | Male   | Early Neonatal | 1 to 4  | Global     | 1         | Indoor Air Pollution (All Cooking Fuels)           |
| Cleft lip and cleft palate | Male   | Early Neonatal | 1 to 4  | Global     | 1         | Smoking Prevalence (Reproductive Age Standardised) |
| Cleft lip and cleft palate | Male   | Early Neonatal | 1 to 4  | Data Rich  | -1        | Education (years per capita)                       |
| Cleft lip and cleft palate | Male   | Early Neonatal | 1 to 4  | Data Rich  | -1        | Fruits (kcal per capita)                           |
| Cleft lip and cleft palate | Male   | Early Neonatal | 1 to 4  | Data Rich  | -1        | Health System Access (capped)                      |
| Cleft lip and cleft palate | Male   | Early Neonatal | 1 to 4  | Data Rich  | -1        | LDI (IS per capita)                                |
| Cleft lip and cleft palate | Male   | Early Neonatal | 1 to 4  | Data Rich  | -1        | Legality of Abortion                               |
| Cleft lip and cleft palate | Male   | Early Neonatal | 1 to 4  | Data Rich  | -1        | Sociodemographic Status                            |
| Cleft lip and cleft palate | Male   | Early Neonatal | 1 to 4  | Data Rich  | -1        | Vegetables (kcal per capita)                       |
| Cleft lip and cleft palate | Male   | Early Neonatal | 1 to 4  | Data Rich  | 1         | Alcohol (litres per capita)                        |
| Cleft lip and cleft palate | Male   | Early Neonatal | 1 to 4  | Data Rich  | 1         | Diabetes Age-Standardised Prevalence (proportion)  |
| Cleft lip and cleft palate | Male   | Early Neonatal | 1 to 4  | Data Rich  | 1         | Indoor Air Pollution (All Cooking Fuels)           |
| Cleft lip and cleft palate | Male   | Early Neonatal | 1 to 4  | Data Rich  | 1         | Smoking Prevalence (Reproductive Age Standardised) |
| Cleft lip and cleft palate | Female | Early Neonatal | 1 to 4  | Global     | -1        | Education (years per capita)                       |
| Cleft lip and cleft palate | Female | Early Neonatal | 1 to 4  | Global     | -1        | Fruits (kcal per capita)                           |
| Cleft lip and cleft palate | Female | Early Neonatal | 1 to 4  | Global     | -1        | Health System Access (capped)                      |
| Cleft lip and cleft palate | Female | Early Neonatal | 1 to 4  | Global     | -1        | LDI (IS per capita)                                |
| Cleft lip and cleft palate | Female | Early Neonatal | 1 to 4  | Global     | -1        | Legality of Abortion                               |
| Cleft lip and cleft palate | Female | Early Neonatal | 1 to 4  | Global     | -1        | Sociodemographic Status                            |
| Cleft lip and cleft palate | Female | Early Neonatal | 1 to 4  | Global     | -1        | Vegetables (kcal per capita)                       |
| Cleft lip and cleft palate | Female | Early Neonatal | 1 to 4  | Global     | 1         | Alcohol (litres per capita)                        |
| Cleft lip and cleft palate | Female | Early Neonatal | 1 to 4  | Global     | 1         | Diabetes Age-Standardised Prevalence (proportion)  |
| Cleft lip and cleft palate | Female | Early Neonatal | 1 to 4  | Global     | 1         | Indoor Air Pollution (All Cooking Fuels)           |
| Cleft lip and cleft palate | Female | Early Neonatal | 1 to 4  | Global     | 1         | Smoking Prevalence (Reproductive Age Standardised) |
| Cleft lip and cleft palate | Female | Early Neonatal | 1 to 4  | Data Rich  | -1        | Education (years per capita)                       |
| Cleft lip and cleft palate | Female | Early Neonatal | 1 to 4  | Data Rich  | -1        | Fruits (kcal per capita)                           |
| Cleft lip and cleft palate | Female | Early Neonatal | 1 to 4  | Data Rich  | -1        | Health System Access (capped)                      |
| Cleft lip and cleft palate | Female | Early Neonatal | 1 to 4  | Data Rich  | -1        | LDI (IS per capita)                                |
| Cleft lip and cleft palate | Female | Early Neonatal | 1 to 4  | Data Rich  | -1        | Legality of Abortion                               |
| Cleft lip and cleft palate | Female | Early Neonatal | 1 to 4  | Data Rich  | -1        | Sociodemographic Status                            |
| Cleft lip and cleft palate | Female | Early Neonatal | 1 to 4  | Data Rich  | -1        | Vegetables (kcal per capita)                       |
| Cleft lip and cleft palate | Female | Early Neonatal | 1 to 4  | Data Rich  | 1         | Alcohol (litres per capita)                        |
| Cleft lip and cleft palate | Female | Early Neonatal | 1 to 4  | Data Rich  | 1         | Diabetes Age-Standardised Prevalence (proportion)  |
| Cleft lip and cleft palate | Female | Early Neonatal | 1 to 4  | Data Rich  | 1         | Indoor Air Pollution (All Cooking Fuels)           |
| Cleft lip and cleft palate | Female | Early Neonatal | 1 to 4  | Data Rich  | 1         | Smoking Prevalence (Reproductive Age Standardised) |
| Down syndrome              | Male   | Early Neonatal | 80 plus | Global     | -1        | Education (years per capita)                       |
| Down syndrome              | Male   | Early Neonatal | 80 plus | Global     | -1        | Health System Access 2 (unitless)                  |
| Down syndrome              | Male   | Early Neonatal | 80 plus | Global     | -1        | LDI (IS per capita)                                |

**Appendix Table 10: CODEm covariates used, level of covariate, and expected direction of covariate by cause, sex, and age**

| Cause                           | Sex    | Age start      | Age end | Model type | Direction | Covariate                                          |
|---------------------------------|--------|----------------|---------|------------|-----------|----------------------------------------------------|
| Down syndrome                   | Male   | Early Neonatal | 80 plus | Global     | -1        | Legality of Abortion                               |
| Down syndrome                   | Male   | Early Neonatal | 80 plus | Global     | -1        | Measles Vaccine Coverage (proportion)              |
| Down syndrome                   | Male   | Early Neonatal | 80 plus | Global     | -1        | Sociodemographic Status                            |
| Down syndrome                   | Male   | Early Neonatal | 80 plus | Global     | 1         | Alcohol (litres per capita)                        |
| Down syndrome                   | Male   | Early Neonatal | 80 plus | Global     | 1         | Indoor Air Pollution (All Cooking Fuels)           |
| Down syndrome                   | Male   | Early Neonatal | 80 plus | Global     | 1         | Live Births 35+ (proportion)                       |
| Down syndrome                   | Male   | Early Neonatal | 80 plus | Global     | 1         | Live Births 40+ (proportion)                       |
| Down syndrome                   | Male   | Early Neonatal | 80 plus | Global     | 1         | Smoking Prevalence (Reproductive Age Standardised) |
| Down syndrome                   | Male   | Early Neonatal | 80 plus | Data Rich  | -1        | Education (years per capita)                       |
| Down syndrome                   | Male   | Early Neonatal | 80 plus | Data Rich  | -1        | Health System Access 2 (unitless)                  |
| Down syndrome                   | Male   | Early Neonatal | 80 plus | Data Rich  | -1        | LDI (IS per capita)                                |
| Down syndrome                   | Male   | Early Neonatal | 80 plus | Data Rich  | -1        | Legality of Abortion                               |
| Down syndrome                   | Male   | Early Neonatal | 80 plus | Data Rich  | -1        | Measles Vaccine Coverage (proportion)              |
| Down syndrome                   | Male   | Early Neonatal | 80 plus | Data Rich  | -1        | Sociodemographic Status                            |
| Down syndrome                   | Male   | Early Neonatal | 80 plus | Data Rich  | 1         | Alcohol (litres per capita)                        |
| Down syndrome                   | Male   | Early Neonatal | 80 plus | Data Rich  | 1         | Indoor Air Pollution (All Cooking Fuels)           |
| Down syndrome                   | Male   | Early Neonatal | 80 plus | Data Rich  | 1         | Live Births 35+ (proportion)                       |
| Down syndrome                   | Male   | Early Neonatal | 80 plus | Data Rich  | 1         | Live Births 40+ (proportion)                       |
| Down syndrome                   | Male   | Early Neonatal | 80 plus | Data Rich  | 1         | Smoking Prevalence (Reproductive Age Standardised) |
| Down syndrome                   | Female | Early Neonatal | 80 plus | Global     | -1        | Education (years per capita)                       |
| Down syndrome                   | Female | Early Neonatal | 80 plus | Global     | -1        | Health System Access 2 (unitless)                  |
| Down syndrome                   | Female | Early Neonatal | 80 plus | Global     | -1        | LDI (IS per capita)                                |
| Down syndrome                   | Female | Early Neonatal | 80 plus | Global     | -1        | Legality of Abortion                               |
| Down syndrome                   | Female | Early Neonatal | 80 plus | Global     | -1        | Measles Vaccine Coverage (proportion)              |
| Down syndrome                   | Female | Early Neonatal | 80 plus | Global     | -1        | Sociodemographic Status                            |
| Down syndrome                   | Female | Early Neonatal | 80 plus | Global     | 1         | Alcohol (litres per capita)                        |
| Down syndrome                   | Female | Early Neonatal | 80 plus | Global     | 1         | Indoor Air Pollution (All Cooking Fuels)           |
| Down syndrome                   | Female | Early Neonatal | 80 plus | Global     | 1         | Live Births 35+ (proportion)                       |
| Down syndrome                   | Female | Early Neonatal | 80 plus | Global     | 1         | Live Births 40+ (proportion)                       |
| Down syndrome                   | Female | Early Neonatal | 80 plus | Global     | 1         | Smoking Prevalence (Reproductive Age Standardised) |
| Down syndrome                   | Female | Early Neonatal | 80 plus | Data Rich  | -1        | Education (years per capita)                       |
| Down syndrome                   | Female | Early Neonatal | 80 plus | Data Rich  | -1        | Health System Access 2 (unitless)                  |
| Down syndrome                   | Female | Early Neonatal | 80 plus | Data Rich  | -1        | LDI (IS per capita)                                |
| Down syndrome                   | Female | Early Neonatal | 80 plus | Data Rich  | -1        | Legality of Abortion                               |
| Down syndrome                   | Female | Early Neonatal | 80 plus | Data Rich  | -1        | Measles Vaccine Coverage (proportion)              |
| Down syndrome                   | Female | Early Neonatal | 80 plus | Data Rich  | -1        | Sociodemographic Status                            |
| Down syndrome                   | Female | Early Neonatal | 80 plus | Data Rich  | 1         | Alcohol (litres per capita)                        |
| Down syndrome                   | Female | Early Neonatal | 80 plus | Data Rich  | 1         | Indoor Air Pollution (All Cooking Fuels)           |
| Down syndrome                   | Female | Early Neonatal | 80 plus | Data Rich  | 1         | Live Births 35+ (proportion)                       |
| Down syndrome                   | Female | Early Neonatal | 80 plus | Data Rich  | 1         | Live Births 40+ (proportion)                       |
| Down syndrome                   | Female | Early Neonatal | 80 plus | Data Rich  | 1         | Smoking Prevalence (Reproductive Age Standardised) |
| Other chromosomal abnormalities | Male   | Early Neonatal | 80 plus | Global     | -1        | Education (years per capita)                       |
| Other chromosomal abnormalities | Male   | Early Neonatal | 80 plus | Global     | -1        | Health System Access 2 (unitless)                  |
| Other chromosomal abnormalities | Male   | Early Neonatal | 80 plus | Global     | -1        | LDI (IS per capita)                                |

**Appendix Table 10: CODEm covariates used, level of covariate, and expected direction of covariate by cause, sex, and age**

| Cause                           | Sex    | Age start      | Age end | Model type | Direction | Covariate                                          |
|---------------------------------|--------|----------------|---------|------------|-----------|----------------------------------------------------|
| Other chromosomal abnormalities | Male   | Early Neonatal | 80 plus | Global     | -1        | Legality of Abortion                               |
| Other chromosomal abnormalities | Male   | Early Neonatal | 80 plus | Global     | -1        | Measles Vaccine Coverage (proportion)              |
| Other chromosomal abnormalities | Male   | Early Neonatal | 80 plus | Global     | 0         | Sociodemographic Status                            |
| Other chromosomal abnormalities | Male   | Early Neonatal | 80 plus | Global     | 1         | Alcohol (litres per capita)                        |
| Other chromosomal abnormalities | Male   | Early Neonatal | 80 plus | Global     | 1         | Indoor Air Pollution (All Cooking Fuels)           |
| Other chromosomal abnormalities | Male   | Early Neonatal | 80 plus | Global     | 1         | Live Births 35+ (proportion)                       |
| Other chromosomal abnormalities | Male   | Early Neonatal | 80 plus | Global     | 1         | Live Births 40+ (proportion)                       |
| Other chromosomal abnormalities | Male   | Early Neonatal | 80 plus | Global     | 1         | Smoking Prevalence (Reproductive Age Standardised) |
| Other chromosomal abnormalities | Male   | Early Neonatal | 80 plus | Data Rich  | -1        | Education (years per capita)                       |
| Other chromosomal abnormalities | Male   | Early Neonatal | 80 plus | Data Rich  | -1        | Health System Access 2 (unitless)                  |
| Other chromosomal abnormalities | Male   | Early Neonatal | 80 plus | Data Rich  | -1        | LDI (IS per capita)                                |
| Other chromosomal abnormalities | Male   | Early Neonatal | 80 plus | Data Rich  | -1        | Legality of Abortion                               |
| Other chromosomal abnormalities | Male   | Early Neonatal | 80 plus | Data Rich  | -1        | Measles Vaccine Coverage (proportion)              |
| Other chromosomal abnormalities | Male   | Early Neonatal | 80 plus | Data Rich  | 0         | Sociodemographic Status                            |
| Other chromosomal abnormalities | Male   | Early Neonatal | 80 plus | Data Rich  | 1         | Alcohol (litres per capita)                        |
| Other chromosomal abnormalities | Male   | Early Neonatal | 80 plus | Data Rich  | 1         | Indoor Air Pollution (All Cooking Fuels)           |
| Other chromosomal abnormalities | Male   | Early Neonatal | 80 plus | Data Rich  | 1         | Live Births 35+ (proportion)                       |
| Other chromosomal abnormalities | Male   | Early Neonatal | 80 plus | Data Rich  | 1         | Live Births 40+ (proportion)                       |
| Other chromosomal abnormalities | Male   | Early Neonatal | 80 plus | Data Rich  | 1         | Smoking Prevalence (Reproductive Age Standardised) |
| Other chromosomal abnormalities | Female | Early Neonatal | 80 plus | Global     | -1        | Education (years per capita)                       |
| Other chromosomal abnormalities | Female | Early Neonatal | 80 plus | Global     | -1        | Health System Access 2 (unitless)                  |
| Other chromosomal abnormalities | Female | Early Neonatal | 80 plus | Global     | -1        | LDI (IS per capita)                                |
| Other chromosomal abnormalities | Female | Early Neonatal | 80 plus | Global     | -1        | Legality of Abortion                               |
| Other chromosomal abnormalities | Female | Early Neonatal | 80 plus | Global     | -1        | Measles Vaccine Coverage (proportion)              |
| Other chromosomal abnormalities | Female | Early Neonatal | 80 plus | Global     | 0         | Sociodemographic Status                            |
| Other chromosomal abnormalities | Female | Early Neonatal | 80 plus | Global     | 1         | Alcohol (litres per capita)                        |
| Other chromosomal abnormalities | Female | Early Neonatal | 80 plus | Global     | 1         | Indoor Air Pollution (All Cooking Fuels)           |
| Other chromosomal abnormalities | Female | Early Neonatal | 80 plus | Global     | 1         | Live Births 35+ (proportion)                       |
| Other chromosomal abnormalities | Female | Early Neonatal | 80 plus | Global     | 1         | Live Births 40+ (proportion)                       |
| Other chromosomal abnormalities | Female | Early Neonatal | 80 plus | Global     | 1         | Smoking Prevalence (Reproductive Age Standardised) |
| Other chromosomal abnormalities | Female | Early Neonatal | 80 plus | Data Rich  | -1        | Education (years per capita)                       |
| Other chromosomal abnormalities | Female | Early Neonatal | 80 plus | Data Rich  | -1        | Health System Access 2 (unitless)                  |
| Other chromosomal abnormalities | Female | Early Neonatal | 80 plus | Data Rich  | -1        | LDI (IS per capita)                                |
| Other chromosomal abnormalities | Female | Early Neonatal | 80 plus | Data Rich  | -1        | Legality of Abortion                               |
| Other chromosomal abnormalities | Female | Early Neonatal | 80 plus | Data Rich  | -1        | Measles Vaccine Coverage (proportion)              |
| Other chromosomal abnormalities | Female | Early Neonatal | 80 plus | Data Rich  | 0         | Sociodemographic Status                            |
| Other chromosomal abnormalities | Female | Early Neonatal | 80 plus | Data Rich  | 1         | Alcohol (litres per capita)                        |
| Other chromosomal abnormalities | Female | Early Neonatal | 80 plus | Data Rich  | 1         | Indoor Air Pollution (All Cooking Fuels)           |
| Other chromosomal abnormalities | Female | Early Neonatal | 80 plus | Data Rich  | 1         | Live Births 35+ (proportion)                       |
| Other chromosomal abnormalities | Female | Early Neonatal | 80 plus | Data Rich  | 1         | Live Births 40+ (proportion)                       |
| Other chromosomal abnormalities | Female | Early Neonatal | 80 plus | Data Rich  | 1         | Smoking Prevalence (Reproductive Age Standardised) |
| Other congenital anomalies      | Male   | Early Neonatal | 80 plus | Global     | -1        | Education (years per capita)                       |
| Other congenital anomalies      | Male   | Early Neonatal | 80 plus | Global     | -1        | Health System Access 2 (unitless)                  |
| Other congenital anomalies      | Male   | Early Neonatal | 80 plus | Global     | -1        | Legality of Abortion                               |

**Appendix Table 10: CODEm covariates used, level of covariate, and expected direction of covariate by cause, sex, and age**

| Cause                          | Sex    | Age start      | Age end | Model type | Direction | Covariate                                          |
|--------------------------------|--------|----------------|---------|------------|-----------|----------------------------------------------------|
| Other congenital anomalies     | Male   | Early Neonatal | 80 plus | Global     | -1        | Measles Vaccine Coverage (proportion)              |
| Other congenital anomalies     | Male   | Early Neonatal | 80 plus | Global     | 0         | LDI (IS per capita)                                |
| Other congenital anomalies     | Male   | Early Neonatal | 80 plus | Global     | 0         | Sociodemographic Status                            |
| Other congenital anomalies     | Male   | Early Neonatal | 80 plus | Global     | 1         | Alcohol (litres per capita)                        |
| Other congenital anomalies     | Male   | Early Neonatal | 80 plus | Global     | 1         | Diabetes Age-Standardised Prevalence (proportion)  |
| Other congenital anomalies     | Male   | Early Neonatal | 80 plus | Global     | 1         | Indoor Air Pollution (All Cooking Fuels)           |
| Other congenital anomalies     | Male   | Early Neonatal | 80 plus | Global     | 1         | Live Births 35+ (proportion)                       |
| Other congenital anomalies     | Male   | Early Neonatal | 80 plus | Global     | 1         | Smoking Prevalence (Reproductive Age Standardised) |
| Other congenital anomalies     | Male   | Early Neonatal | 80 plus | Data Rich  | -1        | Education (years per capita)                       |
| Other congenital anomalies     | Male   | Early Neonatal | 80 plus | Data Rich  | -1        | Health System Access 2 (unitless)                  |
| Other congenital anomalies     | Male   | Early Neonatal | 80 plus | Data Rich  | -1        | Legality of Abortion                               |
| Other congenital anomalies     | Male   | Early Neonatal | 80 plus | Data Rich  | -1        | Measles Vaccine Coverage (proportion)              |
| Other congenital anomalies     | Male   | Early Neonatal | 80 plus | Data Rich  | 0         | LDI (IS per capita)                                |
| Other congenital anomalies     | Male   | Early Neonatal | 80 plus | Data Rich  | 0         | Sociodemographic Status                            |
| Other congenital anomalies     | Male   | Early Neonatal | 80 plus | Data Rich  | 1         | Alcohol (litres per capita)                        |
| Other congenital anomalies     | Male   | Early Neonatal | 80 plus | Data Rich  | 1         | Diabetes Age-Standardised Prevalence (proportion)  |
| Other congenital anomalies     | Male   | Early Neonatal | 80 plus | Data Rich  | 1         | Indoor Air Pollution (All Cooking Fuels)           |
| Other congenital anomalies     | Male   | Early Neonatal | 80 plus | Data Rich  | 1         | Live Births 35+ (proportion)                       |
| Other congenital anomalies     | Male   | Early Neonatal | 80 plus | Data Rich  | 1         | Smoking Prevalence (Reproductive Age Standardised) |
| Other congenital anomalies     | Female | Early Neonatal | 80 plus | Global     | -1        | Education (years per capita)                       |
| Other congenital anomalies     | Female | Early Neonatal | 80 plus | Global     | -1        | Health System Access 2 (unitless)                  |
| Other congenital anomalies     | Female | Early Neonatal | 80 plus | Global     | -1        | Legality of Abortion                               |
| Other congenital anomalies     | Female | Early Neonatal | 80 plus | Global     | -1        | Measles Vaccine Coverage (proportion)              |
| Other congenital anomalies     | Female | Early Neonatal | 80 plus | Global     | 0         | LDI (IS per capita)                                |
| Other congenital anomalies     | Female | Early Neonatal | 80 plus | Global     | 0         | Sociodemographic Status                            |
| Other congenital anomalies     | Female | Early Neonatal | 80 plus | Global     | 1         | Alcohol (litres per capita)                        |
| Other congenital anomalies     | Female | Early Neonatal | 80 plus | Global     | 1         | Diabetes Age-Standardised Prevalence (proportion)  |
| Other congenital anomalies     | Female | Early Neonatal | 80 plus | Global     | 1         | Indoor Air Pollution (All Cooking Fuels)           |
| Other congenital anomalies     | Female | Early Neonatal | 80 plus | Global     | 1         | Live Births 35+ (proportion)                       |
| Other congenital anomalies     | Female | Early Neonatal | 80 plus | Global     | 1         | Smoking Prevalence (Reproductive Age Standardised) |
| Other congenital anomalies     | Female | Early Neonatal | 80 plus | Data Rich  | -1        | Education (years per capita)                       |
| Other congenital anomalies     | Female | Early Neonatal | 80 plus | Data Rich  | -1        | Health System Access 2 (unitless)                  |
| Other congenital anomalies     | Female | Early Neonatal | 80 plus | Data Rich  | -1        | Legality of Abortion                               |
| Other congenital anomalies     | Female | Early Neonatal | 80 plus | Data Rich  | -1        | Measles Vaccine Coverage (proportion)              |
| Other congenital anomalies     | Female | Early Neonatal | 80 plus | Data Rich  | 0         | LDI (IS per capita)                                |
| Other congenital anomalies     | Female | Early Neonatal | 80 plus | Data Rich  | 0         | Sociodemographic Status                            |
| Other congenital anomalies     | Female | Early Neonatal | 80 plus | Data Rich  | 1         | Alcohol (litres per capita)                        |
| Other congenital anomalies     | Female | Early Neonatal | 80 plus | Data Rich  | 1         | Diabetes Age-Standardised Prevalence (proportion)  |
| Other congenital anomalies     | Female | Early Neonatal | 80 plus | Data Rich  | 1         | Indoor Air Pollution (All Cooking Fuels)           |
| Other congenital anomalies     | Female | Early Neonatal | 80 plus | Data Rich  | 1         | Live Births 35+ (proportion)                       |
| Other congenital anomalies     | Female | Early Neonatal | 80 plus | Data Rich  | 1         | Smoking Prevalence (Reproductive Age Standardised) |
| Skin and subcutaneous diseases | Male   | Post Neonatal  | 80 plus | Global     | -1        | Education (years per capita)                       |
| Skin and subcutaneous diseases | Male   | Post Neonatal  | 80 plus | Global     | -1        | Health System Access 2 (unitless)                  |
| Skin and subcutaneous diseases | Male   | Post Neonatal  | 80 plus | Global     | -1        | Improved Water Source (proportion with access)     |

**Appendix Table 10: CODEm covariates used, level of covariate, and expected direction of covariate by cause, sex, and age**

| Cause                          | Sex    | Age start     | Age end | Model type | Direction | Covariate                                      |
|--------------------------------|--------|---------------|---------|------------|-----------|------------------------------------------------|
| Skin and subcutaneous diseases | Male   | Post Neonatal | 80 plus | Global     | -1        | LDI (IS per capita)                            |
| Skin and subcutaneous diseases | Male   | Post Neonatal | 80 plus | Global     | 0         | Sociodemographic Status                        |
| Skin and subcutaneous diseases | Male   | Post Neonatal | 80 plus | Global     | 1         | Alcohol (litres per capita)                    |
| Skin and subcutaneous diseases | Male   | Post Neonatal | 80 plus | Global     | 1         | Cumulative Cigarettes (10 Years)               |
| Skin and subcutaneous diseases | Male   | Post Neonatal | 80 plus | Global     | 1         | Cumulative Cigarettes (5 Years)                |
| Skin and subcutaneous diseases | Male   | Post Neonatal | 80 plus | Global     | 1         | Malnutrition (proportion <2SD weight for age)  |
| Skin and subcutaneous diseases | Male   | Post Neonatal | 80 plus | Global     | 1         | SEV unsafe sanitation                          |
| Skin and subcutaneous diseases | Male   | Post Neonatal | 80 plus | Global     | 1         | Smoking Prevalence                             |
| Skin and subcutaneous diseases | Male   | Post Neonatal | 80 plus | Data Rich  | -1        | Education (years per capita)                   |
| Skin and subcutaneous diseases | Male   | Post Neonatal | 80 plus | Data Rich  | -1        | Health System Access 2 (unitless)              |
| Skin and subcutaneous diseases | Male   | Post Neonatal | 80 plus | Data Rich  | -1        | Improved Water Source (proportion with access) |
| Skin and subcutaneous diseases | Male   | Post Neonatal | 80 plus | Data Rich  | -1        | LDI (IS per capita)                            |
| Skin and subcutaneous diseases | Male   | Post Neonatal | 80 plus | Data Rich  | 0         | Sociodemographic Status                        |
| Skin and subcutaneous diseases | Male   | Post Neonatal | 80 plus | Data Rich  | 1         | Alcohol (litres per capita)                    |
| Skin and subcutaneous diseases | Male   | Post Neonatal | 80 plus | Data Rich  | 1         | Cumulative Cigarettes (10 Years)               |
| Skin and subcutaneous diseases | Male   | Post Neonatal | 80 plus | Data Rich  | 1         | Cumulative Cigarettes (5 Years)                |
| Skin and subcutaneous diseases | Male   | Post Neonatal | 80 plus | Data Rich  | 1         | Malnutrition (proportion <2SD weight for age)  |
| Skin and subcutaneous diseases | Male   | Post Neonatal | 80 plus | Data Rich  | 1         | SEV unsafe sanitation                          |
| Skin and subcutaneous diseases | Male   | Post Neonatal | 80 plus | Data Rich  | 1         | Smoking Prevalence                             |
| Skin and subcutaneous diseases | Female | Post Neonatal | 80 plus | Global     | -1        | Education (years per capita)                   |
| Skin and subcutaneous diseases | Female | Post Neonatal | 80 plus | Global     | -1        | Health System Access 2 (unitless)              |
| Skin and subcutaneous diseases | Female | Post Neonatal | 80 plus | Global     | -1        | Improved Water Source (proportion with access) |
| Skin and subcutaneous diseases | Female | Post Neonatal | 80 plus | Global     | -1        | LDI (IS per capita)                            |
| Skin and subcutaneous diseases | Female | Post Neonatal | 80 plus | Global     | 0         | Sociodemographic Status                        |
| Skin and subcutaneous diseases | Female | Post Neonatal | 80 plus | Global     | 1         | Alcohol (litres per capita)                    |
| Skin and subcutaneous diseases | Female | Post Neonatal | 80 plus | Global     | 1         | Cumulative Cigarettes (10 Years)               |
| Skin and subcutaneous diseases | Female | Post Neonatal | 80 plus | Global     | 1         | Cumulative Cigarettes (5 Years)                |
| Skin and subcutaneous diseases | Female | Post Neonatal | 80 plus | Global     | 1         | Malnutrition (proportion <2SD weight for age)  |
| Skin and subcutaneous diseases | Female | Post Neonatal | 80 plus | Global     | 1         | SEV unsafe sanitation                          |
| Skin and subcutaneous diseases | Female | Post Neonatal | 80 plus | Global     | 1         | Smoking Prevalence                             |
| Skin and subcutaneous diseases | Female | Post Neonatal | 80 plus | Data Rich  | -1        | Education (years per capita)                   |
| Skin and subcutaneous diseases | Female | Post Neonatal | 80 plus | Data Rich  | -1        | Health System Access 2 (unitless)              |
| Skin and subcutaneous diseases | Female | Post Neonatal | 80 plus | Data Rich  | -1        | Improved Water Source (proportion with access) |
| Skin and subcutaneous diseases | Female | Post Neonatal | 80 plus | Data Rich  | -1        | LDI (IS per capita)                            |
| Skin and subcutaneous diseases | Female | Post Neonatal | 80 plus | Data Rich  | 0         | Sociodemographic Status                        |
| Skin and subcutaneous diseases | Female | Post Neonatal | 80 plus | Data Rich  | 1         | Alcohol (litres per capita)                    |
| Skin and subcutaneous diseases | Female | Post Neonatal | 80 plus | Data Rich  | 1         | Cumulative Cigarettes (10 Years)               |
| Skin and subcutaneous diseases | Female | Post Neonatal | 80 plus | Data Rich  | 1         | Cumulative Cigarettes (5 Years)                |
| Skin and subcutaneous diseases | Female | Post Neonatal | 80 plus | Data Rich  | 1         | Malnutrition (proportion <2SD weight for age)  |
| Skin and subcutaneous diseases | Female | Post Neonatal | 80 plus | Data Rich  | 1         | SEV unsafe sanitation                          |
| Skin and subcutaneous diseases | Female | Post Neonatal | 80 plus | Data Rich  | 1         | Smoking Prevalence                             |
| Cellulitis                     | Male   | Post Neonatal | 80 plus | Global     | -1        | Education (years per capita)                   |
| Cellulitis                     | Male   | Post Neonatal | 80 plus | Global     | -1        | Health System Access 2 (unitless)              |
| Cellulitis                     | Male   | Post Neonatal | 80 plus | Global     | -1        | Improved Water Source (proportion with access) |

**Appendix Table 10: CODEm covariates used, level of covariate, and expected direction of covariate by cause, sex, and age**

| Cause      | Sex    | Age start      | Age end | Model type | Direction | Covariate                                      |
|------------|--------|----------------|---------|------------|-----------|------------------------------------------------|
| Cellulitis | Male   | Post Neonatal  | 80 plus | Global     | -1        | LDI (IS per capita)                            |
| Cellulitis | Male   | Post Neonatal  | 80 plus | Global     | -1        | Sociodemographic Status                        |
| Cellulitis | Male   | Post Neonatal  | 80 plus | Global     | 1         | Alcohol (litres per capita)                    |
| Cellulitis | Male   | Post Neonatal  | 80 plus | Global     | 1         | Cumulative Cigarettes (10 Years)               |
| Cellulitis | Male   | Post Neonatal  | 80 plus | Global     | 1         | Cumulative Cigarettes (5 Years)                |
| Cellulitis | Male   | Post Neonatal  | 80 plus | Global     | 1         | Malnutrition (proportion <2SD weight for age)  |
| Cellulitis | Male   | Post Neonatal  | 80 plus | Global     | 1         | SEV unsafe sanitation                          |
| Cellulitis | Male   | Post Neonatal  | 80 plus | Global     | 1         | Smoking Prevalence                             |
| Cellulitis | Male   | Post Neonatal  | 80 plus | Data Rich  | -1        | Education (years per capita)                   |
| Cellulitis | Male   | Post Neonatal  | 80 plus | Data Rich  | -1        | Health System Access 2 (unitless)              |
| Cellulitis | Male   | Post Neonatal  | 80 plus | Data Rich  | -1        | Improved Water Source (proportion with access) |
| Cellulitis | Male   | Post Neonatal  | 80 plus | Data Rich  | -1        | LDI (IS per capita)                            |
| Cellulitis | Male   | Post Neonatal  | 80 plus | Data Rich  | -1        | Sociodemographic Status                        |
| Cellulitis | Male   | Post Neonatal  | 80 plus | Data Rich  | 1         | Alcohol (litres per capita)                    |
| Cellulitis | Male   | Post Neonatal  | 80 plus | Data Rich  | 1         | Cumulative Cigarettes (10 Years)               |
| Cellulitis | Male   | Post Neonatal  | 80 plus | Data Rich  | 1         | Cumulative Cigarettes (5 Years)                |
| Cellulitis | Male   | Post Neonatal  | 80 plus | Data Rich  | 1         | Malnutrition (proportion <2SD weight for age)  |
| Cellulitis | Male   | Post Neonatal  | 80 plus | Data Rich  | 1         | SEV unsafe sanitation                          |
| Cellulitis | Male   | Post Neonatal  | 80 plus | Data Rich  | 1         | Smoking Prevalence                             |
| Cellulitis | Female | Post Neonatal  | 80 plus | Global     | -1        | Education (years per capita)                   |
| Cellulitis | Female | Post Neonatal  | 80 plus | Global     | -1        | Health System Access 2 (unitless)              |
| Cellulitis | Female | Post Neonatal  | 80 plus | Global     | -1        | Improved Water Source (proportion with access) |
| Cellulitis | Female | Post Neonatal  | 80 plus | Global     | -1        | LDI (IS per capita)                            |
| Cellulitis | Female | Post Neonatal  | 80 plus | Global     | -1        | Sociodemographic Status                        |
| Cellulitis | Female | Post Neonatal  | 80 plus | Global     | 1         | Alcohol (litres per capita)                    |
| Cellulitis | Female | Post Neonatal  | 80 plus | Global     | 1         | Cumulative Cigarettes (10 Years)               |
| Cellulitis | Female | Post Neonatal  | 80 plus | Global     | 1         | Cumulative Cigarettes (5 Years)                |
| Cellulitis | Female | Post Neonatal  | 80 plus | Global     | 1         | Malnutrition (proportion <2SD weight for age)  |
| Cellulitis | Female | Post Neonatal  | 80 plus | Global     | 1         | SEV unsafe sanitation                          |
| Cellulitis | Female | Post Neonatal  | 80 plus | Global     | 1         | Smoking Prevalence                             |
| Cellulitis | Female | Post Neonatal  | 80 plus | Data Rich  | -1        | Education (years per capita)                   |
| Cellulitis | Female | Post Neonatal  | 80 plus | Data Rich  | -1        | Health System Access 2 (unitless)              |
| Cellulitis | Female | Post Neonatal  | 80 plus | Data Rich  | -1        | Improved Water Source (proportion with access) |
| Cellulitis | Female | Post Neonatal  | 80 plus | Data Rich  | -1        | LDI (IS per capita)                            |
| Cellulitis | Female | Post Neonatal  | 80 plus | Data Rich  | -1        | Sociodemographic Status                        |
| Cellulitis | Female | Post Neonatal  | 80 plus | Data Rich  | 1         | Alcohol (litres per capita)                    |
| Cellulitis | Female | Post Neonatal  | 80 plus | Data Rich  | 1         | Cumulative Cigarettes (10 Years)               |
| Cellulitis | Female | Post Neonatal  | 80 plus | Data Rich  | 1         | Cumulative Cigarettes (5 Years)                |
| Cellulitis | Female | Post Neonatal  | 80 plus | Data Rich  | 1         | Malnutrition (proportion <2SD weight for age)  |
| Cellulitis | Female | Post Neonatal  | 80 plus | Data Rich  | 1         | SEV unsafe sanitation                          |
| Cellulitis | Female | Post Neonatal  | 80 plus | Data Rich  | 1         | Smoking Prevalence                             |
| Pyoderma   | Male   | Early Neonatal | 80 plus | Global     | -1        | Education (years per capita)                   |
| Pyoderma   | Male   | Early Neonatal | 80 plus | Global     | -1        | Improved Water Source (proportion with access) |
| Pyoderma   | Male   | Early Neonatal | 80 plus | Global     | -1        | LDI (IS per capita)                            |

**Appendix Table 10: CODEm covariates used, level of covariate, and expected direction of covariate by cause, sex, and age**

| Cause           | Sex    | Age start      | Age end | Model type | Direction | Covariate                                      |
|-----------------|--------|----------------|---------|------------|-----------|------------------------------------------------|
| Pyoderma        | Male   | Early Neonatal | 80 plus | Global     | 0         | Sociodemographic Status                        |
| Pyoderma        | Male   | Early Neonatal | 80 plus | Global     | 1         | Alcohol (litres per capita)                    |
| Pyoderma        | Male   | Early Neonatal | 80 plus | Global     | 1         | Cumulative Cigarettes (10 Years)               |
| Pyoderma        | Male   | Early Neonatal | 80 plus | Global     | 1         | Cumulative Cigarettes (5 Years)                |
| Pyoderma        | Male   | Early Neonatal | 80 plus | Global     | 1         | Health System Access 2 (unitless)              |
| Pyoderma        | Male   | Early Neonatal | 80 plus | Global     | 1         | Malnutrition (proportion <2SD weight for age)  |
| Pyoderma        | Male   | Early Neonatal | 80 plus | Global     | 1         | SEV unsafe sanitation                          |
| Pyoderma        | Male   | Early Neonatal | 80 plus | Global     | 1         | Smoking Prevalence                             |
| Pyoderma        | Male   | Early Neonatal | 80 plus | Data Rich  | -1        | Education (years per capita)                   |
| Pyoderma        | Male   | Early Neonatal | 80 plus | Data Rich  | -1        | Improved Water Source (proportion with access) |
| Pyoderma        | Male   | Early Neonatal | 80 plus | Data Rich  | -1        | LDI (IS per capita)                            |
| Pyoderma        | Male   | Early Neonatal | 80 plus | Data Rich  | 0         | Sociodemographic Status                        |
| Pyoderma        | Male   | Early Neonatal | 80 plus | Data Rich  | 1         | Alcohol (litres per capita)                    |
| Pyoderma        | Male   | Early Neonatal | 80 plus | Data Rich  | 1         | Cumulative Cigarettes (10 Years)               |
| Pyoderma        | Male   | Early Neonatal | 80 plus | Data Rich  | 1         | Cumulative Cigarettes (5 Years)                |
| Pyoderma        | Male   | Early Neonatal | 80 plus | Data Rich  | 1         | Health System Access 2 (unitless)              |
| Pyoderma        | Male   | Early Neonatal | 80 plus | Data Rich  | 1         | Malnutrition (proportion <2SD weight for age)  |
| Pyoderma        | Male   | Early Neonatal | 80 plus | Data Rich  | 1         | SEV unsafe sanitation                          |
| Pyoderma        | Male   | Early Neonatal | 80 plus | Data Rich  | 1         | Smoking Prevalence                             |
| Pyoderma        | Female | Early Neonatal | 80 plus | Global     | -1        | Education (years per capita)                   |
| Pyoderma        | Female | Early Neonatal | 80 plus | Global     | -1        | Improved Water Source (proportion with access) |
| Pyoderma        | Female | Early Neonatal | 80 plus | Global     | -1        | LDI (IS per capita)                            |
| Pyoderma        | Female | Early Neonatal | 80 plus | Global     | 0         | Sociodemographic Status                        |
| Pyoderma        | Female | Early Neonatal | 80 plus | Global     | 1         | Alcohol (litres per capita)                    |
| Pyoderma        | Female | Early Neonatal | 80 plus | Global     | 1         | Cumulative Cigarettes (10 Years)               |
| Pyoderma        | Female | Early Neonatal | 80 plus | Global     | 1         | Cumulative Cigarettes (5 Years)                |
| Pyoderma        | Female | Early Neonatal | 80 plus | Global     | 1         | Health System Access 2 (unitless)              |
| Pyoderma        | Female | Early Neonatal | 80 plus | Global     | 1         | Malnutrition (proportion <2SD weight for age)  |
| Pyoderma        | Female | Early Neonatal | 80 plus | Global     | 1         | SEV unsafe sanitation                          |
| Pyoderma        | Female | Early Neonatal | 80 plus | Global     | 1         | Smoking Prevalence                             |
| Pyoderma        | Female | Early Neonatal | 80 plus | Data Rich  | -1        | Education (years per capita)                   |
| Pyoderma        | Female | Early Neonatal | 80 plus | Data Rich  | -1        | Improved Water Source (proportion with access) |
| Pyoderma        | Female | Early Neonatal | 80 plus | Data Rich  | -1        | LDI (IS per capita)                            |
| Pyoderma        | Female | Early Neonatal | 80 plus | Data Rich  | 0         | Sociodemographic Status                        |
| Pyoderma        | Female | Early Neonatal | 80 plus | Data Rich  | 1         | Alcohol (litres per capita)                    |
| Pyoderma        | Female | Early Neonatal | 80 plus | Data Rich  | 1         | Cumulative Cigarettes (10 Years)               |
| Pyoderma        | Female | Early Neonatal | 80 plus | Data Rich  | 1         | Cumulative Cigarettes (5 Years)                |
| Pyoderma        | Female | Early Neonatal | 80 plus | Data Rich  | 1         | Health System Access 2 (unitless)              |
| Pyoderma        | Female | Early Neonatal | 80 plus | Data Rich  | 1         | Malnutrition (proportion <2SD weight for age)  |
| Pyoderma        | Female | Early Neonatal | 80 plus | Data Rich  | 1         | SEV unsafe sanitation                          |
| Pyoderma        | Female | Early Neonatal | 80 plus | Data Rich  | 1         | Smoking Prevalence                             |
| Decubitus ulcer | Male   | 1 to 4         | 80 plus | Global     | -1        | Education (years per capita)                   |
| Decubitus ulcer | Male   | 1 to 4         | 80 plus | Global     | -1        | Health System Access 2 (unitless)              |
| Decubitus ulcer | Male   | 1 to 4         | 80 plus | Global     | -1        | Improved Water Source (proportion with access) |



**Appendix Table 10: CODEm covariates used, level of covariate, and expected direction of covariate by cause, sex, and age**

| Cause                                | Sex    | Age start     | Age end | Model type | Direction | Covariate                                      |
|--------------------------------------|--------|---------------|---------|------------|-----------|------------------------------------------------|
| Decubitus ulcer                      | Male   | 1 to 4        | 80 plus | Global     | -1        | LDI (IS per capita)                            |
| Decubitus ulcer                      | Male   | 1 to 4        | 80 plus | Global     | 0         | Sociodemographic Status                        |
| Decubitus ulcer                      | Male   | 1 to 4        | 80 plus | Global     | 1         | Alcohol (litres per capita)                    |
| Decubitus ulcer                      | Male   | 1 to 4        | 80 plus | Global     | 1         | Cumulative Cigarettes (10 Years)               |
| Decubitus ulcer                      | Male   | 1 to 4        | 80 plus | Global     | 1         | Cumulative Cigarettes (5 Years)                |
| Decubitus ulcer                      | Male   | 1 to 4        | 80 plus | Global     | 1         | Malnutrition (proportion <2SD weight for age)  |
| Decubitus ulcer                      | Male   | 1 to 4        | 80 plus | Global     | 1         | SEV unsafe sanitation                          |
| Decubitus ulcer                      | Male   | 1 to 4        | 80 plus | Global     | 1         | Smoking Prevalence                             |
| Decubitus ulcer                      | Male   | 1 to 4        | 80 plus | Data Rich  | -1        | Education (years per capita)                   |
| Decubitus ulcer                      | Male   | 1 to 4        | 80 plus | Data Rich  | -1        | Health System Access 2 (unitless)              |
| Decubitus ulcer                      | Male   | 1 to 4        | 80 plus | Data Rich  | -1        | Improved Water Source (proportion with access) |
| Decubitus ulcer                      | Male   | 1 to 4        | 80 plus | Data Rich  | -1        | LDI (IS per capita)                            |
| Decubitus ulcer                      | Male   | 1 to 4        | 80 plus | Data Rich  | 0         | Sociodemographic Status                        |
| Decubitus ulcer                      | Male   | 1 to 4        | 80 plus | Data Rich  | 1         | Alcohol (litres per capita)                    |
| Decubitus ulcer                      | Male   | 1 to 4        | 80 plus | Data Rich  | 1         | Cumulative Cigarettes (10 Years)               |
| Decubitus ulcer                      | Male   | 1 to 4        | 80 plus | Data Rich  | 1         | Cumulative Cigarettes (5 Years)                |
| Decubitus ulcer                      | Male   | 1 to 4        | 80 plus | Data Rich  | 1         | Malnutrition (proportion <2SD weight for age)  |
| Decubitus ulcer                      | Male   | 1 to 4        | 80 plus | Data Rich  | 1         | SEV unsafe sanitation                          |
| Decubitus ulcer                      | Male   | 1 to 4        | 80 plus | Data Rich  | 1         | Smoking Prevalence                             |
| Decubitus ulcer                      | Female | 1 to 4        | 80 plus | Global     | -1        | Education (years per capita)                   |
| Decubitus ulcer                      | Female | 1 to 4        | 80 plus | Global     | -1        | Health System Access 2 (unitless)              |
| Decubitus ulcer                      | Female | 1 to 4        | 80 plus | Global     | -1        | Improved Water Source (proportion with access) |
| Decubitus ulcer                      | Female | 1 to 4        | 80 plus | Global     | -1        | LDI (IS per capita)                            |
| Decubitus ulcer                      | Female | 1 to 4        | 80 plus | Global     | 0         | Sociodemographic Status                        |
| Decubitus ulcer                      | Female | 1 to 4        | 80 plus | Global     | 1         | Alcohol (litres per capita)                    |
| Decubitus ulcer                      | Female | 1 to 4        | 80 plus | Global     | 1         | Cumulative Cigarettes (10 Years)               |
| Decubitus ulcer                      | Female | 1 to 4        | 80 plus | Global     | 1         | Cumulative Cigarettes (5 Years)                |
| Decubitus ulcer                      | Female | 1 to 4        | 80 plus | Global     | 1         | Malnutrition (proportion <2SD weight for age)  |
| Decubitus ulcer                      | Female | 1 to 4        | 80 plus | Global     | 1         | SEV unsafe sanitation                          |
| Decubitus ulcer                      | Female | 1 to 4        | 80 plus | Global     | 1         | Smoking Prevalence                             |
| Decubitus ulcer                      | Female | 1 to 4        | 80 plus | Data Rich  | -1        | Education (years per capita)                   |
| Decubitus ulcer                      | Female | 1 to 4        | 80 plus | Data Rich  | -1        | Health System Access 2 (unitless)              |
| Decubitus ulcer                      | Female | 1 to 4        | 80 plus | Data Rich  | -1        | Improved Water Source (proportion with access) |
| Decubitus ulcer                      | Female | 1 to 4        | 80 plus | Data Rich  | -1        | LDI (IS per capita)                            |
| Decubitus ulcer                      | Female | 1 to 4        | 80 plus | Data Rich  | 0         | Sociodemographic Status                        |
| Decubitus ulcer                      | Female | 1 to 4        | 80 plus | Data Rich  | 1         | Alcohol (litres per capita)                    |
| Decubitus ulcer                      | Female | 1 to 4        | 80 plus | Data Rich  | 1         | Cumulative Cigarettes (10 Years)               |
| Decubitus ulcer                      | Female | 1 to 4        | 80 plus | Data Rich  | 1         | Cumulative Cigarettes (5 Years)                |
| Decubitus ulcer                      | Female | 1 to 4        | 80 plus | Data Rich  | 1         | Malnutrition (proportion <2SD weight for age)  |
| Decubitus ulcer                      | Female | 1 to 4        | 80 plus | Data Rich  | 1         | SEV unsafe sanitation                          |
| Decubitus ulcer                      | Female | 1 to 4        | 80 plus | Data Rich  | 1         | Smoking Prevalence                             |
| Other skin and subcutaneous diseases | Male   | Post Neonatal | 80 plus | Global     | -1        | Education (years per capita)                   |
| Other skin and subcutaneous diseases | Male   | Post Neonatal | 80 plus | Global     | -1        | Health System Access 2 (unitless)              |
| Other skin and subcutaneous diseases | Male   | Post Neonatal | 80 plus | Global     | -1        | Improved Water Source (proportion with access) |

**Appendix Table 10: CODEm covariates used, level of covariate, and expected direction of covariate by cause, sex, and age**

| Cause                                | Sex    | Age start     | Age end       | Model type | Direction | Covariate                                      |
|--------------------------------------|--------|---------------|---------------|------------|-----------|------------------------------------------------|
| Other skin and subcutaneous diseases | Male   | Post Neonatal | 80 plus       | Global     | -1        | LDI (IS per capita)                            |
| Other skin and subcutaneous diseases | Male   | Post Neonatal | 80 plus       | Global     | 0         | Sociodemographic Status                        |
| Other skin and subcutaneous diseases | Male   | Post Neonatal | 80 plus       | Global     | 1         | Alcohol (litres per capita)                    |
| Other skin and subcutaneous diseases | Male   | Post Neonatal | 80 plus       | Global     | 1         | Cumulative Cigarettes (10 Years)               |
| Other skin and subcutaneous diseases | Male   | Post Neonatal | 80 plus       | Global     | 1         | Cumulative Cigarettes (5 Years)                |
| Other skin and subcutaneous diseases | Male   | Post Neonatal | 80 plus       | Global     | 1         | Malnutrition (proportion <2SD weight for age)  |
| Other skin and subcutaneous diseases | Male   | Post Neonatal | 80 plus       | Global     | 1         | SEV unsafe sanitation                          |
| Other skin and subcutaneous diseases | Male   | Post Neonatal | 80 plus       | Global     | 1         | Smoking Prevalence                             |
| Other skin and subcutaneous diseases | Male   | Post Neonatal | 80 plus       | Data Rich  | -1        | Education (years per capita)                   |
| Other skin and subcutaneous diseases | Male   | Post Neonatal | 80 plus       | Data Rich  | -1        | Health System Access 2 (unitless)              |
| Other skin and subcutaneous diseases | Male   | Post Neonatal | 80 plus       | Data Rich  | -1        | Improved Water Source (proportion with access) |
| Other skin and subcutaneous diseases | Male   | Post Neonatal | 80 plus       | Data Rich  | -1        | LDI (IS per capita)                            |
| Other skin and subcutaneous diseases | Male   | Post Neonatal | 80 plus       | Data Rich  | 0         | Sociodemographic Status                        |
| Other skin and subcutaneous diseases | Male   | Post Neonatal | 80 plus       | Data Rich  | 1         | Alcohol (litres per capita)                    |
| Other skin and subcutaneous diseases | Male   | Post Neonatal | 80 plus       | Data Rich  | 1         | Cumulative Cigarettes (10 Years)               |
| Other skin and subcutaneous diseases | Male   | Post Neonatal | 80 plus       | Data Rich  | 1         | Cumulative Cigarettes (5 Years)                |
| Other skin and subcutaneous diseases | Male   | Post Neonatal | 80 plus       | Data Rich  | 1         | Malnutrition (proportion <2SD weight for age)  |
| Other skin and subcutaneous diseases | Male   | Post Neonatal | 80 plus       | Data Rich  | 1         | SEV unsafe sanitation                          |
| Other skin and subcutaneous diseases | Male   | Post Neonatal | 80 plus       | Data Rich  | 1         | Smoking Prevalence                             |
| Other skin and subcutaneous diseases | Female | Post Neonatal | 80 plus       | Global     | -1        | Education (years per capita)                   |
| Other skin and subcutaneous diseases | Female | Post Neonatal | 80 plus       | Global     | -1        | Health System Access 2 (unitless)              |
| Other skin and subcutaneous diseases | Female | Post Neonatal | 80 plus       | Global     | -1        | Improved Water Source (proportion with access) |
| Other skin and subcutaneous diseases | Female | Post Neonatal | 80 plus       | Global     | -1        | LDI (IS per capita)                            |
| Other skin and subcutaneous diseases | Female | Post Neonatal | 80 plus       | Global     | 0         | Sociodemographic Status                        |
| Other skin and subcutaneous diseases | Female | Post Neonatal | 80 plus       | Global     | 1         | Alcohol (litres per capita)                    |
| Other skin and subcutaneous diseases | Female | Post Neonatal | 80 plus       | Global     | 1         | Cumulative Cigarettes (10 Years)               |
| Other skin and subcutaneous diseases | Female | Post Neonatal | 80 plus       | Global     | 1         | Cumulative Cigarettes (5 Years)                |
| Other skin and subcutaneous diseases | Female | Post Neonatal | 80 plus       | Global     | 1         | Malnutrition (proportion <2SD weight for age)  |
| Other skin and subcutaneous diseases | Female | Post Neonatal | 80 plus       | Global     | 1         | SEV unsafe sanitation                          |
| Other skin and subcutaneous diseases | Female | Post Neonatal | 80 plus       | Global     | 1         | Smoking Prevalence                             |
| Other skin and subcutaneous diseases | Female | Post Neonatal | 80 plus       | Data Rich  | -1        | Education (years per capita)                   |
| Other skin and subcutaneous diseases | Female | Post Neonatal | 80 plus       | Data Rich  | -1        | Health System Access 2 (unitless)              |
| Other skin and subcutaneous diseases | Female | Post Neonatal | 80 plus       | Data Rich  | -1        | Improved Water Source (proportion with access) |
| Other skin and subcutaneous diseases | Female | Post Neonatal | 80 plus       | Data Rich  | -1        | LDI (IS per capita)                            |
| Other skin and subcutaneous diseases | Female | Post Neonatal | 80 plus       | Data Rich  | 0         | Sociodemographic Status                        |
| Other skin and subcutaneous diseases | Female | Post Neonatal | 80 plus       | Data Rich  | 1         | Alcohol (litres per capita)                    |
| Other skin and subcutaneous diseases | Female | Post Neonatal | 80 plus       | Data Rich  | 1         | Cumulative Cigarettes (10 Years)               |
| Other skin and subcutaneous diseases | Female | Post Neonatal | 80 plus       | Data Rich  | 1         | Cumulative Cigarettes (5 Years)                |
| Other skin and subcutaneous diseases | Female | Post Neonatal | 80 plus       | Data Rich  | 1         | Malnutrition (proportion <2SD weight for age)  |
| Other skin and subcutaneous diseases | Female | Post Neonatal | 80 plus       | Data Rich  | 1         | SEV unsafe sanitation                          |
| Other skin and subcutaneous diseases | Female | Post Neonatal | 80 plus       | Data Rich  | 1         | Smoking Prevalence                             |
| Sudden infant death syndrome         | Male   | Late Neonatal | Post Neonatal | Global     | -1        | Education (years per capita)                   |
| Sudden infant death syndrome         | Male   | Late Neonatal | Post Neonatal | Global     | -1        | Health System Access 2 (unitless)              |
| Sudden infant death syndrome         | Male   | Late Neonatal | Post Neonatal | Global     | -1        | In-Facility Delivery (proportion)              |

**Appendix Table 10: CODEm covariates used, level of covariate, and expected direction of covariate by cause, sex, and age**

| Cause                        | Sex    | Age start      | Age end       | Model type | Direction | Covariate                                          |
|------------------------------|--------|----------------|---------------|------------|-----------|----------------------------------------------------|
| Sudden infant death syndrome | Male   | Late Neonatal  | Post Neonatal | Global     | -1        | Skilled Birth Attendance (proportion)              |
| Sudden infant death syndrome | Male   | Late Neonatal  | Post Neonatal | Global     | 0         | LDI (IS per capita)                                |
| Sudden infant death syndrome | Male   | Late Neonatal  | Post Neonatal | Global     | 0         | Sociodemographic Status                            |
| Sudden infant death syndrome | Male   | Late Neonatal  | Post Neonatal | Global     | 1         | Indoor Air Pollution (All Cooking Fuels)           |
| Sudden infant death syndrome | Male   | Late Neonatal  | Post Neonatal | Global     | 1         | Malnutrition (proportion <2SD weight for age)      |
| Sudden infant death syndrome | Male   | Late Neonatal  | Post Neonatal | Global     | 1         | Smoking Prevalence (Reproductive Age Standardised) |
| Sudden infant death syndrome | Male   | Late Neonatal  | Post Neonatal | Global     | 1         | Total Fertility Rate                               |
| Sudden infant death syndrome | Male   | Late Neonatal  | Post Neonatal | Data Rich  | -1        | Education (years per capita)                       |
| Sudden infant death syndrome | Male   | Late Neonatal  | Post Neonatal | Data Rich  | -1        | Health System Access 2 (unitless)                  |
| Sudden infant death syndrome | Male   | Late Neonatal  | Post Neonatal | Data Rich  | -1        | In-Facility Delivery (proportion)                  |
| Sudden infant death syndrome | Male   | Late Neonatal  | Post Neonatal | Data Rich  | -1        | Skilled Birth Attendance (proportion)              |
| Sudden infant death syndrome | Male   | Late Neonatal  | Post Neonatal | Data Rich  | 0         | LDI (IS per capita)                                |
| Sudden infant death syndrome | Male   | Late Neonatal  | Post Neonatal | Data Rich  | 0         | Sociodemographic Status                            |
| Sudden infant death syndrome | Male   | Late Neonatal  | Post Neonatal | Data Rich  | 1         | Indoor Air Pollution (All Cooking Fuels)           |
| Sudden infant death syndrome | Male   | Late Neonatal  | Post Neonatal | Data Rich  | 1         | Malnutrition (proportion <2SD weight for age)      |
| Sudden infant death syndrome | Male   | Late Neonatal  | Post Neonatal | Data Rich  | 1         | Smoking Prevalence (Reproductive Age Standardised) |
| Sudden infant death syndrome | Male   | Late Neonatal  | Post Neonatal | Data Rich  | 1         | Total Fertility Rate                               |
| Sudden infant death syndrome | Female | Late Neonatal  | Post Neonatal | Global     | -1        | Education (years per capita)                       |
| Sudden infant death syndrome | Female | Late Neonatal  | Post Neonatal | Global     | -1        | Health System Access 2 (unitless)                  |
| Sudden infant death syndrome | Female | Late Neonatal  | Post Neonatal | Global     | -1        | In-Facility Delivery (proportion)                  |
| Sudden infant death syndrome | Female | Late Neonatal  | Post Neonatal | Global     | -1        | Skilled Birth Attendance (proportion)              |
| Sudden infant death syndrome | Female | Late Neonatal  | Post Neonatal | Global     | 0         | LDI (IS per capita)                                |
| Sudden infant death syndrome | Female | Late Neonatal  | Post Neonatal | Global     | 0         | Sociodemographic Status                            |
| Sudden infant death syndrome | Female | Late Neonatal  | Post Neonatal | Global     | 1         | Indoor Air Pollution (All Cooking Fuels)           |
| Sudden infant death syndrome | Female | Late Neonatal  | Post Neonatal | Global     | 1         | Malnutrition (proportion <2SD weight for age)      |
| Sudden infant death syndrome | Female | Late Neonatal  | Post Neonatal | Global     | 1         | Smoking Prevalence (Reproductive Age Standardised) |
| Sudden infant death syndrome | Female | Late Neonatal  | Post Neonatal | Global     | 1         | Total Fertility Rate                               |
| Sudden infant death syndrome | Female | Late Neonatal  | Post Neonatal | Data Rich  | -1        | Education (years per capita)                       |
| Sudden infant death syndrome | Female | Late Neonatal  | Post Neonatal | Data Rich  | -1        | Health System Access 2 (unitless)                  |
| Sudden infant death syndrome | Female | Late Neonatal  | Post Neonatal | Data Rich  | -1        | In-Facility Delivery (proportion)                  |
| Sudden infant death syndrome | Female | Late Neonatal  | Post Neonatal | Data Rich  | -1        | Skilled Birth Attendance (proportion)              |
| Sudden infant death syndrome | Female | Late Neonatal  | Post Neonatal | Data Rich  | 0         | LDI (IS per capita)                                |
| Sudden infant death syndrome | Female | Late Neonatal  | Post Neonatal | Data Rich  | 0         | Sociodemographic Status                            |
| Sudden infant death syndrome | Female | Late Neonatal  | Post Neonatal | Data Rich  | 1         | Indoor Air Pollution (All Cooking Fuels)           |
| Sudden infant death syndrome | Female | Late Neonatal  | Post Neonatal | Data Rich  | 1         | Malnutrition (proportion <2SD weight for age)      |
| Sudden infant death syndrome | Female | Late Neonatal  | Post Neonatal | Data Rich  | 1         | Smoking Prevalence (Reproductive Age Standardised) |
| Sudden infant death syndrome | Female | Late Neonatal  | Post Neonatal | Data Rich  | 1         | Total Fertility Rate                               |
| Transport injuries           | Male   | Early Neonatal | 80 plus       | Global     | -1        | Education (years per capita)                       |
| Transport injuries           | Male   | Early Neonatal | 80 plus       | Global     | -1        | Health System Access 2 (unitless)                  |
| Transport injuries           | Male   | Early Neonatal | 80 plus       | Global     | -1        | Sociodemographic Status                            |
| Transport injuries           | Male   | Early Neonatal | 80 plus       | Global     | 0         | LDI (IS per capita)                                |
| Transport injuries           | Male   | Early Neonatal | 80 plus       | Global     | 0         | Population Density (300-500 ppl/sqkm, proportion)  |
| Transport injuries           | Male   | Early Neonatal | 80 plus       | Global     | 0         | Population Density (500-1000 ppl/sqkm, proportion) |
| Transport injuries           | Male   | Early Neonatal | 80 plus       | Global     | 1         | Alcohol (litres per capita)                        |

**Appendix Table 10: CODEm covariates used, level of covariate, and expected direction of covariate by cause, sex, and age**

| Cause              | Sex    | Age start      | Age end | Model type | Direction | Covariate                                          |
|--------------------|--------|----------------|---------|------------|-----------|----------------------------------------------------|
| Transport injuries | Male   | Early Neonatal | 80 plus | Global     | 1         | Rainfall Quintile 5 (proportion)                   |
| Transport injuries | Male   | Early Neonatal | 80 plus | Global     | 1         | Vehicles - 2 wheels fraction (proportion)          |
| Transport injuries | Male   | Early Neonatal | 80 plus | Global     | 1         | Vehicles - 2+4 wheels (per capita)                 |
| Transport injuries | Male   | Early Neonatal | 80 plus | Data Rich  | -1        | Education (years per capita)                       |
| Transport injuries | Male   | Early Neonatal | 80 plus | Data Rich  | -1        | Health System Access 2 (unitless)                  |
| Transport injuries | Male   | Early Neonatal | 80 plus | Data Rich  | -1        | Sociodemographic Status                            |
| Transport injuries | Male   | Early Neonatal | 80 plus | Data Rich  | 0         | LDI (IS per capita)                                |
| Transport injuries | Male   | Early Neonatal | 80 plus | Data Rich  | 0         | Population Density (300-500 ppl/sqkm, proportion)  |
| Transport injuries | Male   | Early Neonatal | 80 plus | Data Rich  | 0         | Population Density (500-1000 ppl/sqkm, proportion) |
| Transport injuries | Male   | Early Neonatal | 80 plus | Data Rich  | 1         | Alcohol (litres per capita)                        |
| Transport injuries | Male   | Early Neonatal | 80 plus | Data Rich  | 1         | Rainfall Quintile 5 (proportion)                   |
| Transport injuries | Male   | Early Neonatal | 80 plus | Data Rich  | 1         | Vehicles - 2 wheels fraction (proportion)          |
| Transport injuries | Male   | Early Neonatal | 80 plus | Data Rich  | 1         | Vehicles - 2+4 wheels (per capita)                 |
| Transport injuries | Female | Early Neonatal | 80 plus | Global     | -1        | Education (years per capita)                       |
| Transport injuries | Female | Early Neonatal | 80 plus | Global     | -1        | Health System Access 2 (unitless)                  |
| Transport injuries | Female | Early Neonatal | 80 plus | Global     | -1        | Sociodemographic Status                            |
| Transport injuries | Female | Early Neonatal | 80 plus | Global     | 0         | LDI (IS per capita)                                |
| Transport injuries | Female | Early Neonatal | 80 plus | Global     | 0         | Population Density (300-500 ppl/sqkm, proportion)  |
| Transport injuries | Female | Early Neonatal | 80 plus | Global     | 0         | Population Density (500-1000 ppl/sqkm, proportion) |
| Transport injuries | Female | Early Neonatal | 80 plus | Global     | 1         | Alcohol (litres per capita)                        |
| Transport injuries | Female | Early Neonatal | 80 plus | Global     | 1         | Rainfall Quintile 5 (proportion)                   |
| Transport injuries | Female | Early Neonatal | 80 plus | Global     | 1         | Vehicles - 2 wheels fraction (proportion)          |
| Transport injuries | Female | Early Neonatal | 80 plus | Global     | 1         | Vehicles - 2+4 wheels (per capita)                 |
| Transport injuries | Female | Early Neonatal | 80 plus | Data Rich  | -1        | Education (years per capita)                       |
| Transport injuries | Female | Early Neonatal | 80 plus | Data Rich  | -1        | Health System Access 2 (unitless)                  |
| Transport injuries | Female | Early Neonatal | 80 plus | Data Rich  | -1        | Sociodemographic Status                            |
| Transport injuries | Female | Early Neonatal | 80 plus | Data Rich  | 0         | LDI (IS per capita)                                |
| Transport injuries | Female | Early Neonatal | 80 plus | Data Rich  | 0         | Population Density (300-500 ppl/sqkm, proportion)  |
| Transport injuries | Female | Early Neonatal | 80 plus | Data Rich  | 0         | Population Density (500-1000 ppl/sqkm, proportion) |
| Transport injuries | Female | Early Neonatal | 80 plus | Data Rich  | 1         | Alcohol (litres per capita)                        |
| Transport injuries | Female | Early Neonatal | 80 plus | Data Rich  | 1         | Rainfall Quintile 5 (proportion)                   |
| Transport injuries | Female | Early Neonatal | 80 plus | Data Rich  | 1         | Vehicles - 2 wheels fraction (proportion)          |
| Transport injuries | Female | Early Neonatal | 80 plus | Data Rich  | 1         | Vehicles - 2+4 wheels (per capita)                 |
| Road injuries      | Male   | Early Neonatal | 80 plus | Global     | -1        | Education (years per capita)                       |
| Road injuries      | Male   | Early Neonatal | 80 plus | Global     | -1        | Health System Access 2 (unitless)                  |
| Road injuries      | Male   | Early Neonatal | 80 plus | Global     | -1        | Sociodemographic Status                            |
| Road injuries      | Male   | Early Neonatal | 80 plus | Global     | 0         | LDI (IS per capita)                                |
| Road injuries      | Male   | Early Neonatal | 80 plus | Global     | 0         | Population Density (300-500 ppl/sqkm, proportion)  |
| Road injuries      | Male   | Early Neonatal | 80 plus | Global     | 0         | Population Density (500-1000 ppl/sqkm, proportion) |
| Road injuries      | Male   | Early Neonatal | 80 plus | Global     | 1         | Alcohol (litres per capita)                        |
| Road injuries      | Male   | Early Neonatal | 80 plus | Global     | 1         | Log-transformed SEV scalar: Road Inj               |
| Road injuries      | Male   | Early Neonatal | 80 plus | Global     | 1         | Population 15 to 30 (proportion)                   |
| Road injuries      | Male   | Early Neonatal | 80 plus | Global     | 1         | Vehicles - 2 wheels (per capita)                   |
| Road injuries      | Male   | Early Neonatal | 80 plus | Global     | 1         | Vehicles - 2 wheels fraction (proportion)          |

**Appendix Table 10: CODEm covariates used, level of covariate, and expected direction of covariate by cause, sex, and age**

| Cause                    | Sex    | Age start      | Age end | Model type | Direction | Covariate                                          |
|--------------------------|--------|----------------|---------|------------|-----------|----------------------------------------------------|
| Road injuries            | Male   | Early Neonatal | 80 plus | Global     | 1         | Vehicles - 2+4 wheels (per capita)                 |
| Road injuries            | Male   | Early Neonatal | 80 plus | Global     | 1         | Vehicles - 4 wheels (per capita)                   |
| Road injuries            | Male   | Early Neonatal | 80 plus | Data Rich  | -1        | Education (years per capita)                       |
| Road injuries            | Male   | Early Neonatal | 80 plus | Data Rich  | -1        | Health System Access 2 (unitless)                  |
| Road injuries            | Male   | Early Neonatal | 80 plus | Data Rich  | -1        | Sociodemographic Status                            |
| Road injuries            | Male   | Early Neonatal | 80 plus | Data Rich  | 0         | LDI (IS per capita)                                |
| Road injuries            | Male   | Early Neonatal | 80 plus | Data Rich  | 0         | Population Density (300-500 ppl/sqkm, proportion)  |
| Road injuries            | Male   | Early Neonatal | 80 plus | Data Rich  | 0         | Population Density (500-1000 ppl/sqkm, proportion) |
| Road injuries            | Male   | Early Neonatal | 80 plus | Data Rich  | 1         | Alcohol (litres per capita)                        |
| Road injuries            | Male   | Early Neonatal | 80 plus | Data Rich  | 1         | Log-transformed SEV scalar: Road Inj               |
| Road injuries            | Male   | Early Neonatal | 80 plus | Data Rich  | 1         | Population 15 to 30 (proportion)                   |
| Road injuries            | Male   | Early Neonatal | 80 plus | Data Rich  | 1         | Vehicles - 2 wheels (per capita)                   |
| Road injuries            | Male   | Early Neonatal | 80 plus | Data Rich  | 1         | Vehicles - 2 wheels fraction (proportion)          |
| Road injuries            | Male   | Early Neonatal | 80 plus | Data Rich  | 1         | Vehicles - 2+4 wheels (per capita)                 |
| Road injuries            | Male   | Early Neonatal | 80 plus | Data Rich  | 1         | Vehicles - 4 wheels (per capita)                   |
| Road injuries            | Female | Early Neonatal | 80 plus | Global     | -1        | Education (years per capita)                       |
| Road injuries            | Female | Early Neonatal | 80 plus | Global     | -1        | Health System Access 2 (unitless)                  |
| Road injuries            | Female | Early Neonatal | 80 plus | Global     | -1        | Sociodemographic Status                            |
| Road injuries            | Female | Early Neonatal | 80 plus | Global     | 0         | LDI (IS per capita)                                |
| Road injuries            | Female | Early Neonatal | 80 plus | Global     | 0         | Population Density (300-500 ppl/sqkm, proportion)  |
| Road injuries            | Female | Early Neonatal | 80 plus | Global     | 0         | Population Density (500-1000 ppl/sqkm, proportion) |
| Road injuries            | Female | Early Neonatal | 80 plus | Global     | 1         | Alcohol (litres per capita)                        |
| Road injuries            | Female | Early Neonatal | 80 plus | Global     | 1         | Log-transformed SEV scalar: Road Inj               |
| Road injuries            | Female | Early Neonatal | 80 plus | Global     | 1         | Population 15 to 30 (proportion)                   |
| Road injuries            | Female | Early Neonatal | 80 plus | Global     | 1         | Vehicles - 2 wheels (per capita)                   |
| Road injuries            | Female | Early Neonatal | 80 plus | Global     | 1         | Vehicles - 2 wheels fraction (proportion)          |
| Road injuries            | Female | Early Neonatal | 80 plus | Global     | 1         | Vehicles - 2+4 wheels (per capita)                 |
| Road injuries            | Female | Early Neonatal | 80 plus | Global     | 1         | Vehicles - 4 wheels (per capita)                   |
| Road injuries            | Female | Early Neonatal | 80 plus | Data Rich  | -1        | Education (years per capita)                       |
| Road injuries            | Female | Early Neonatal | 80 plus | Data Rich  | -1        | Health System Access 2 (unitless)                  |
| Road injuries            | Female | Early Neonatal | 80 plus | Data Rich  | -1        | Sociodemographic Status                            |
| Road injuries            | Female | Early Neonatal | 80 plus | Data Rich  | 0         | LDI (IS per capita)                                |
| Road injuries            | Female | Early Neonatal | 80 plus | Data Rich  | 0         | Population Density (300-500 ppl/sqkm, proportion)  |
| Road injuries            | Female | Early Neonatal | 80 plus | Data Rich  | 0         | Population Density (500-1000 ppl/sqkm, proportion) |
| Road injuries            | Female | Early Neonatal | 80 plus | Data Rich  | 1         | Alcohol (litres per capita)                        |
| Road injuries            | Female | Early Neonatal | 80 plus | Data Rich  | 1         | Log-transformed SEV scalar: Road Inj               |
| Road injuries            | Female | Early Neonatal | 80 plus | Data Rich  | 1         | Population 15 to 30 (proportion)                   |
| Road injuries            | Female | Early Neonatal | 80 plus | Data Rich  | 1         | Vehicles - 2 wheels (per capita)                   |
| Road injuries            | Female | Early Neonatal | 80 plus | Data Rich  | 1         | Vehicles - 2 wheels fraction (proportion)          |
| Road injuries            | Female | Early Neonatal | 80 plus | Data Rich  | 1         | Vehicles - 2+4 wheels (per capita)                 |
| Road injuries            | Female | Early Neonatal | 80 plus | Data Rich  | 1         | Vehicles - 4 wheels (per capita)                   |
| Pedestrian road injuries | Male   | Early Neonatal | 80 plus | Global     | -1        | Education (years per capita)                       |
| Pedestrian road injuries | Male   | Early Neonatal | 80 plus | Global     | -1        | Health System Access 2 (unitless)                  |
| Pedestrian road injuries | Male   | Early Neonatal | 80 plus | Global     | -1        | Sociodemographic Status                            |

**Appendix Table 10: CODEm covariates used, level of covariate, and expected direction of covariate by cause, sex, and age**

| Cause                    | Sex    | Age start      | Age end | Model type | Direction | Covariate                                          |
|--------------------------|--------|----------------|---------|------------|-----------|----------------------------------------------------|
| Pedestrian road injuries | Male   | Early Neonatal | 80 plus | Global     | 0         | LDI (IS per capita)                                |
| Pedestrian road injuries | Male   | Early Neonatal | 80 plus | Global     | 0         | Population Density (300-500 ppl/sqkm, proportion)  |
| Pedestrian road injuries | Male   | Early Neonatal | 80 plus | Global     | 0         | Population Density (500-1000 ppl/sqkm, proportion) |
| Pedestrian road injuries | Male   | Early Neonatal | 80 plus | Global     | 1         | Alcohol (litres per capita)                        |
| Pedestrian road injuries | Male   | Early Neonatal | 80 plus | Global     | 1         | Log-transformed SEV scalar: Pedest                 |
| Pedestrian road injuries | Male   | Early Neonatal | 80 plus | Global     | 1         | Rainfall Quintile 5 (proportion)                   |
| Pedestrian road injuries | Male   | Early Neonatal | 80 plus | Global     | 1         | Vehicles - 2 wheels fraction (proportion)          |
| Pedestrian road injuries | Male   | Early Neonatal | 80 plus | Global     | 1         | Vehicles - 2+4 wheels (per capita)                 |
| Pedestrian road injuries | Male   | Early Neonatal | 80 plus | Data Rich  | -1        | Education (years per capita)                       |
| Pedestrian road injuries | Male   | Early Neonatal | 80 plus | Data Rich  | -1        | Health System Access 2 (unitless)                  |
| Pedestrian road injuries | Male   | Early Neonatal | 80 plus | Data Rich  | -1        | Sociodemographic Status                            |
| Pedestrian road injuries | Male   | Early Neonatal | 80 plus | Data Rich  | 0         | LDI (IS per capita)                                |
| Pedestrian road injuries | Male   | Early Neonatal | 80 plus | Data Rich  | 0         | Population Density (300-500 ppl/sqkm, proportion)  |
| Pedestrian road injuries | Male   | Early Neonatal | 80 plus | Data Rich  | 0         | Population Density (500-1000 ppl/sqkm, proportion) |
| Pedestrian road injuries | Male   | Early Neonatal | 80 plus | Data Rich  | 1         | Alcohol (litres per capita)                        |
| Pedestrian road injuries | Male   | Early Neonatal | 80 plus | Data Rich  | 1         | Log-transformed SEV scalar: Pedest                 |
| Pedestrian road injuries | Male   | Early Neonatal | 80 plus | Data Rich  | 1         | Rainfall Quintile 5 (proportion)                   |
| Pedestrian road injuries | Male   | Early Neonatal | 80 plus | Data Rich  | 1         | Vehicles - 2 wheels fraction (proportion)          |
| Pedestrian road injuries | Male   | Early Neonatal | 80 plus | Data Rich  | 1         | Vehicles - 2+4 wheels (per capita)                 |
| Pedestrian road injuries | Female | Early Neonatal | 80 plus | Global     | -1        | Education (years per capita)                       |
| Pedestrian road injuries | Female | Early Neonatal | 80 plus | Global     | -1        | Health System Access 2 (unitless)                  |
| Pedestrian road injuries | Female | Early Neonatal | 80 plus | Global     | -1        | Sociodemographic Status                            |
| Pedestrian road injuries | Female | Early Neonatal | 80 plus | Global     | 0         | LDI (IS per capita)                                |
| Pedestrian road injuries | Female | Early Neonatal | 80 plus | Global     | 0         | Population Density (300-500 ppl/sqkm, proportion)  |
| Pedestrian road injuries | Female | Early Neonatal | 80 plus | Global     | 0         | Population Density (500-1000 ppl/sqkm, proportion) |
| Pedestrian road injuries | Female | Early Neonatal | 80 plus | Global     | 1         | Alcohol (litres per capita)                        |
| Pedestrian road injuries | Female | Early Neonatal | 80 plus | Global     | 1         | Log-transformed SEV scalar: Pedest                 |
| Pedestrian road injuries | Female | Early Neonatal | 80 plus | Global     | 1         | Rainfall Quintile 5 (proportion)                   |
| Pedestrian road injuries | Female | Early Neonatal | 80 plus | Global     | 1         | Vehicles - 2 wheels fraction (proportion)          |
| Pedestrian road injuries | Female | Early Neonatal | 80 plus | Global     | 1         | Vehicles - 2+4 wheels (per capita)                 |
| Pedestrian road injuries | Female | Early Neonatal | 80 plus | Data Rich  | -1        | Education (years per capita)                       |
| Pedestrian road injuries | Female | Early Neonatal | 80 plus | Data Rich  | -1        | Health System Access 2 (unitless)                  |
| Pedestrian road injuries | Female | Early Neonatal | 80 plus | Data Rich  | -1        | Sociodemographic Status                            |
| Pedestrian road injuries | Female | Early Neonatal | 80 plus | Data Rich  | 0         | LDI (IS per capita)                                |
| Pedestrian road injuries | Female | Early Neonatal | 80 plus | Data Rich  | 0         | Population Density (300-500 ppl/sqkm, proportion)  |
| Pedestrian road injuries | Female | Early Neonatal | 80 plus | Data Rich  | 0         | Population Density (500-1000 ppl/sqkm, proportion) |
| Pedestrian road injuries | Female | Early Neonatal | 80 plus | Data Rich  | 1         | Alcohol (litres per capita)                        |
| Pedestrian road injuries | Female | Early Neonatal | 80 plus | Data Rich  | 1         | Log-transformed SEV scalar: Pedest                 |
| Pedestrian road injuries | Female | Early Neonatal | 80 plus | Data Rich  | 1         | Rainfall Quintile 5 (proportion)                   |
| Pedestrian road injuries | Female | Early Neonatal | 80 plus | Data Rich  | 1         | Vehicles - 2 wheels fraction (proportion)          |
| Pedestrian road injuries | Female | Early Neonatal | 80 plus | Data Rich  | 1         | Vehicles - 2+4 wheels (per capita)                 |
| Cyclist road injuries    | Male   | 1 to 4         | 80 plus | Global     | -1        | Education (years per capita)                       |
| Cyclist road injuries    | Male   | 1 to 4         | 80 plus | Global     | -1        | Health System Access 2 (unitless)                  |
| Cyclist road injuries    | Male   | 1 to 4         | 80 plus | Global     | 0         | LDI (IS per capita)                                |

**Appendix Table 10: CODEm covariates used, level of covariate, and expected direction of covariate by cause, sex, and age**

| Cause                      | Sex    | Age start      | Age end | Model type | Direction | Covariate                                          |
|----------------------------|--------|----------------|---------|------------|-----------|----------------------------------------------------|
| Cyclist road injuries      | Male   | 1 to 4         | 80 plus | Global     | 0         | Population Density (300-500 ppl/sqkm, proportion)  |
| Cyclist road injuries      | Male   | 1 to 4         | 80 plus | Global     | 0         | Population Density (500-1000 ppl/sqkm, proportion) |
| Cyclist road injuries      | Male   | 1 to 4         | 80 plus | Global     | 0         | Sociodemographic Status                            |
| Cyclist road injuries      | Male   | 1 to 4         | 80 plus | Global     | 1         | Alcohol (litres per capita)                        |
| Cyclist road injuries      | Male   | 1 to 4         | 80 plus | Global     | 1         | Log-transformed SEV scalar: Cyclist                |
| Cyclist road injuries      | Male   | 1 to 4         | 80 plus | Global     | 1         | Vehicles - 2 wheels fraction (proportion)          |
| Cyclist road injuries      | Male   | 1 to 4         | 80 plus | Global     | 1         | Vehicles - 2+4 wheels (per capita)                 |
| Cyclist road injuries      | Male   | 1 to 4         | 80 plus | Data Rich  | -1        | Education (years per capita)                       |
| Cyclist road injuries      | Male   | 1 to 4         | 80 plus | Data Rich  | -1        | Health System Access 2 (unitless)                  |
| Cyclist road injuries      | Male   | 1 to 4         | 80 plus | Data Rich  | 0         | LDI (IS per capita)                                |
| Cyclist road injuries      | Male   | 1 to 4         | 80 plus | Data Rich  | 0         | Population Density (300-500 ppl/sqkm, proportion)  |
| Cyclist road injuries      | Male   | 1 to 4         | 80 plus | Data Rich  | 0         | Population Density (500-1000 ppl/sqkm, proportion) |
| Cyclist road injuries      | Male   | 1 to 4         | 80 plus | Data Rich  | 0         | Sociodemographic Status                            |
| Cyclist road injuries      | Male   | 1 to 4         | 80 plus | Data Rich  | 1         | Alcohol (litres per capita)                        |
| Cyclist road injuries      | Male   | 1 to 4         | 80 plus | Data Rich  | 1         | Log-transformed SEV scalar: Cyclist                |
| Cyclist road injuries      | Male   | 1 to 4         | 80 plus | Data Rich  | 1         | Vehicles - 2 wheels fraction (proportion)          |
| Cyclist road injuries      | Male   | 1 to 4         | 80 plus | Data Rich  | 1         | Vehicles - 2+4 wheels (per capita)                 |
| Cyclist road injuries      | Female | 1 to 4         | 80 plus | Global     | -1        | Education (years per capita)                       |
| Cyclist road injuries      | Female | 1 to 4         | 80 plus | Global     | -1        | Health System Access 2 (unitless)                  |
| Cyclist road injuries      | Female | 1 to 4         | 80 plus | Global     | 0         | LDI (IS per capita)                                |
| Cyclist road injuries      | Female | 1 to 4         | 80 plus | Global     | 0         | Population Density (300-500 ppl/sqkm, proportion)  |
| Cyclist road injuries      | Female | 1 to 4         | 80 plus | Global     | 0         | Population Density (500-1000 ppl/sqkm, proportion) |
| Cyclist road injuries      | Female | 1 to 4         | 80 plus | Global     | 0         | Sociodemographic Status                            |
| Cyclist road injuries      | Female | 1 to 4         | 80 plus | Global     | 1         | Alcohol (litres per capita)                        |
| Cyclist road injuries      | Female | 1 to 4         | 80 plus | Global     | 1         | Log-transformed SEV scalar: Cyclist                |
| Cyclist road injuries      | Female | 1 to 4         | 80 plus | Global     | 1         | Vehicles - 2 wheels fraction (proportion)          |
| Cyclist road injuries      | Female | 1 to 4         | 80 plus | Global     | 1         | Vehicles - 2+4 wheels (per capita)                 |
| Cyclist road injuries      | Female | 1 to 4         | 80 plus | Data Rich  | -1        | Education (years per capita)                       |
| Cyclist road injuries      | Female | 1 to 4         | 80 plus | Data Rich  | -1        | Health System Access 2 (unitless)                  |
| Cyclist road injuries      | Female | 1 to 4         | 80 plus | Data Rich  | 0         | LDI (IS per capita)                                |
| Cyclist road injuries      | Female | 1 to 4         | 80 plus | Data Rich  | 0         | Population Density (300-500 ppl/sqkm, proportion)  |
| Cyclist road injuries      | Female | 1 to 4         | 80 plus | Data Rich  | 0         | Population Density (500-1000 ppl/sqkm, proportion) |
| Cyclist road injuries      | Female | 1 to 4         | 80 plus | Data Rich  | 0         | Sociodemographic Status                            |
| Cyclist road injuries      | Female | 1 to 4         | 80 plus | Data Rich  | 1         | Alcohol (litres per capita)                        |
| Cyclist road injuries      | Female | 1 to 4         | 80 plus | Data Rich  | 1         | Log-transformed SEV scalar: Cyclist                |
| Cyclist road injuries      | Female | 1 to 4         | 80 plus | Data Rich  | 1         | Vehicles - 2 wheels fraction (proportion)          |
| Cyclist road injuries      | Female | 1 to 4         | 80 plus | Data Rich  | 1         | Vehicles - 2+4 wheels (per capita)                 |
| Motorcyclist road injuries | Male   | Early Neonatal | 80 plus | Global     | -1        | Education (years per capita)                       |
| Motorcyclist road injuries | Male   | Early Neonatal | 80 plus | Global     | -1        | Health System Access 2 (unitless)                  |
| Motorcyclist road injuries | Male   | Early Neonatal | 80 plus | Global     | 0         | LDI (IS per capita)                                |
| Motorcyclist road injuries | Male   | Early Neonatal | 80 plus | Global     | 0         | Population Density (300-500 ppl/sqkm, proportion)  |
| Motorcyclist road injuries | Male   | Early Neonatal | 80 plus | Global     | 0         | Population Density (500-1000 ppl/sqkm, proportion) |
| Motorcyclist road injuries | Male   | Early Neonatal | 80 plus | Global     | 0         | Sociodemographic Status                            |
| Motorcyclist road injuries | Male   | Early Neonatal | 80 plus | Global     | 1         | Alcohol (litres per capita)                        |

**Appendix Table 10: CODEm covariates used, level of covariate, and expected direction of covariate by cause, sex, and age**

| Cause                       | Sex    | Age start      | Age end | Model type | Direction | Covariate                                          |
|-----------------------------|--------|----------------|---------|------------|-----------|----------------------------------------------------|
| Motorcyclist road injuries  | Male   | Early Neonatal | 80 plus | Global     | 1         | Log-transformed SEV scalar: Mot Cyc                |
| Motorcyclist road injuries  | Male   | Early Neonatal | 80 plus | Global     | 1         | Rainfall Quintile 5 (proportion)                   |
| Motorcyclist road injuries  | Male   | Early Neonatal | 80 plus | Global     | 1         | Vehicles - 2 wheels (per capita)                   |
| Motorcyclist road injuries  | Male   | Early Neonatal | 80 plus | Data Rich  | -1        | Education (years per capita)                       |
| Motorcyclist road injuries  | Male   | Early Neonatal | 80 plus | Data Rich  | -1        | Health System Access 2 (unitless)                  |
| Motorcyclist road injuries  | Male   | Early Neonatal | 80 plus | Data Rich  | 0         | LDI (IS per capita)                                |
| Motorcyclist road injuries  | Male   | Early Neonatal | 80 plus | Data Rich  | 0         | Population Density (300-500 ppl/sqkm, proportion)  |
| Motorcyclist road injuries  | Male   | Early Neonatal | 80 plus | Data Rich  | 0         | Population Density (500-1000 ppl/sqkm, proportion) |
| Motorcyclist road injuries  | Male   | Early Neonatal | 80 plus | Data Rich  | 0         | Sociodemographic Status                            |
| Motorcyclist road injuries  | Male   | Early Neonatal | 80 plus | Data Rich  | 1         | Alcohol (litres per capita)                        |
| Motorcyclist road injuries  | Male   | Early Neonatal | 80 plus | Data Rich  | 1         | Log-transformed SEV scalar: Mot Cyc                |
| Motorcyclist road injuries  | Male   | Early Neonatal | 80 plus | Data Rich  | 1         | Rainfall Quintile 5 (proportion)                   |
| Motorcyclist road injuries  | Male   | Early Neonatal | 80 plus | Data Rich  | 1         | Vehicles - 2 wheels (per capita)                   |
| Motorcyclist road injuries  | Female | Early Neonatal | 80 plus | Global     | -1        | Education (years per capita)                       |
| Motorcyclist road injuries  | Female | Early Neonatal | 80 plus | Global     | -1        | Health System Access 2 (unitless)                  |
| Motorcyclist road injuries  | Female | Early Neonatal | 80 plus | Global     | 0         | LDI (IS per capita)                                |
| Motorcyclist road injuries  | Female | Early Neonatal | 80 plus | Global     | 0         | Population Density (300-500 ppl/sqkm, proportion)  |
| Motorcyclist road injuries  | Female | Early Neonatal | 80 plus | Global     | 0         | Population Density (500-1000 ppl/sqkm, proportion) |
| Motorcyclist road injuries  | Female | Early Neonatal | 80 plus | Global     | 0         | Sociodemographic Status                            |
| Motorcyclist road injuries  | Female | Early Neonatal | 80 plus | Global     | 1         | Alcohol (litres per capita)                        |
| Motorcyclist road injuries  | Female | Early Neonatal | 80 plus | Global     | 1         | Log-transformed SEV scalar: Mot Cyc                |
| Motorcyclist road injuries  | Female | Early Neonatal | 80 plus | Global     | 1         | Rainfall Quintile 5 (proportion)                   |
| Motorcyclist road injuries  | Female | Early Neonatal | 80 plus | Global     | 1         | Vehicles - 2 wheels (per capita)                   |
| Motorcyclist road injuries  | Female | Early Neonatal | 80 plus | Data Rich  | -1        | Education (years per capita)                       |
| Motorcyclist road injuries  | Female | Early Neonatal | 80 plus | Data Rich  | -1        | Health System Access 2 (unitless)                  |
| Motorcyclist road injuries  | Female | Early Neonatal | 80 plus | Data Rich  | 0         | LDI (IS per capita)                                |
| Motorcyclist road injuries  | Female | Early Neonatal | 80 plus | Data Rich  | 0         | Population Density (300-500 ppl/sqkm, proportion)  |
| Motorcyclist road injuries  | Female | Early Neonatal | 80 plus | Data Rich  | 0         | Population Density (500-1000 ppl/sqkm, proportion) |
| Motorcyclist road injuries  | Female | Early Neonatal | 80 plus | Data Rich  | 0         | Sociodemographic Status                            |
| Motorcyclist road injuries  | Female | Early Neonatal | 80 plus | Data Rich  | 1         | Alcohol (litres per capita)                        |
| Motorcyclist road injuries  | Female | Early Neonatal | 80 plus | Data Rich  | 1         | Log-transformed SEV scalar: Mot Cyc                |
| Motorcyclist road injuries  | Female | Early Neonatal | 80 plus | Data Rich  | 1         | Rainfall Quintile 5 (proportion)                   |
| Motorcyclist road injuries  | Female | Early Neonatal | 80 plus | Data Rich  | 1         | Vehicles - 2 wheels (per capita)                   |
| Motor vehicle road injuries | Male   | Early Neonatal | 80 plus | Global     | -1        | Education (years per capita)                       |
| Motor vehicle road injuries | Male   | Early Neonatal | 80 plus | Global     | -1        | Health System Access 2 (unitless)                  |
| Motor vehicle road injuries | Male   | Early Neonatal | 80 plus | Global     | 0         | LDI (IS per capita)                                |
| Motor vehicle road injuries | Male   | Early Neonatal | 80 plus | Global     | 0         | Population Density (300-500 ppl/sqkm, proportion)  |
| Motor vehicle road injuries | Male   | Early Neonatal | 80 plus | Global     | 0         | Population Density (500-1000 ppl/sqkm, proportion) |
| Motor vehicle road injuries | Male   | Early Neonatal | 80 plus | Global     | 0         | Sociodemographic Status                            |
| Motor vehicle road injuries | Male   | Early Neonatal | 80 plus | Global     | 1         | Alcohol (litres per capita)                        |
| Motor vehicle road injuries | Male   | Early Neonatal | 80 plus | Global     | 1         | Log-transformed SEV scalar: Mot Veh                |
| Motor vehicle road injuries | Male   | Early Neonatal | 80 plus | Global     | 1         | Rainfall Quintile 5 (proportion)                   |
| Motor vehicle road injuries | Male   | Early Neonatal | 80 plus | Global     | 1         | Vehicles - 4 wheels (per capita)                   |
| Motor vehicle road injuries | Male   | Early Neonatal | 80 plus | Data Rich  | -1        | Education (years per capita)                       |



**Appendix Table 10: CODEm covariates used, level of covariate, and expected direction of covariate by cause, sex, and age**

| Cause                       | Sex    | Age start      | Age end | Model type | Direction | Covariate                                          |
|-----------------------------|--------|----------------|---------|------------|-----------|----------------------------------------------------|
| Motor vehicle road injuries | Male   | Early Neonatal | 80 plus | Data Rich  | -1        | Health System Access 2 (unitless)                  |
| Motor vehicle road injuries | Male   | Early Neonatal | 80 plus | Data Rich  | 0         | LDI (IS per capita)                                |
| Motor vehicle road injuries | Male   | Early Neonatal | 80 plus | Data Rich  | 0         | Population Density (300-500 ppl/sqkm, proportion)  |
| Motor vehicle road injuries | Male   | Early Neonatal | 80 plus | Data Rich  | 0         | Population Density (500-1000 ppl/sqkm, proportion) |
| Motor vehicle road injuries | Male   | Early Neonatal | 80 plus | Data Rich  | 0         | Sociodemographic Status                            |
| Motor vehicle road injuries | Male   | Early Neonatal | 80 plus | Data Rich  | 1         | Alcohol (litres per capita)                        |
| Motor vehicle road injuries | Male   | Early Neonatal | 80 plus | Data Rich  | 1         | Log-transformed SEV scalar: Mot Veh                |
| Motor vehicle road injuries | Male   | Early Neonatal | 80 plus | Data Rich  | 1         | Rainfall Quintile 5 (proportion)                   |
| Motor vehicle road injuries | Male   | Early Neonatal | 80 plus | Data Rich  | 1         | Vehicles - 4 wheels (per capita)                   |
| Motor vehicle road injuries | Female | Early Neonatal | 80 plus | Global     | -1        | Education (years per capita)                       |
| Motor vehicle road injuries | Female | Early Neonatal | 80 plus | Global     | -1        | Health System Access 2 (unitless)                  |
| Motor vehicle road injuries | Female | Early Neonatal | 80 plus | Global     | 0         | LDI (IS per capita)                                |
| Motor vehicle road injuries | Female | Early Neonatal | 80 plus | Global     | 0         | Population Density (300-500 ppl/sqkm, proportion)  |
| Motor vehicle road injuries | Female | Early Neonatal | 80 plus | Global     | 0         | Population Density (500-1000 ppl/sqkm, proportion) |
| Motor vehicle road injuries | Female | Early Neonatal | 80 plus | Global     | 0         | Sociodemographic Status                            |
| Motor vehicle road injuries | Female | Early Neonatal | 80 plus | Global     | 1         | Alcohol (litres per capita)                        |
| Motor vehicle road injuries | Female | Early Neonatal | 80 plus | Global     | 1         | Log-transformed SEV scalar: Mot Veh                |
| Motor vehicle road injuries | Female | Early Neonatal | 80 plus | Global     | 1         | Rainfall Quintile 5 (proportion)                   |
| Motor vehicle road injuries | Female | Early Neonatal | 80 plus | Global     | 1         | Vehicles - 4 wheels (per capita)                   |
| Motor vehicle road injuries | Female | Early Neonatal | 80 plus | Data Rich  | -1        | Education (years per capita)                       |
| Motor vehicle road injuries | Female | Early Neonatal | 80 plus | Data Rich  | -1        | Health System Access 2 (unitless)                  |
| Motor vehicle road injuries | Female | Early Neonatal | 80 plus | Data Rich  | 0         | LDI (IS per capita)                                |
| Motor vehicle road injuries | Female | Early Neonatal | 80 plus | Data Rich  | 0         | Population Density (300-500 ppl/sqkm, proportion)  |
| Motor vehicle road injuries | Female | Early Neonatal | 80 plus | Data Rich  | 0         | Population Density (500-1000 ppl/sqkm, proportion) |
| Motor vehicle road injuries | Female | Early Neonatal | 80 plus | Data Rich  | 0         | Sociodemographic Status                            |
| Motor vehicle road injuries | Female | Early Neonatal | 80 plus | Data Rich  | 1         | Alcohol (litres per capita)                        |
| Motor vehicle road injuries | Female | Early Neonatal | 80 plus | Data Rich  | 1         | Log-transformed SEV scalar: Mot Veh                |
| Motor vehicle road injuries | Female | Early Neonatal | 80 plus | Data Rich  | 1         | Rainfall Quintile 5 (proportion)                   |
| Motor vehicle road injuries | Female | Early Neonatal | 80 plus | Data Rich  | 1         | Vehicles - 4 wheels (per capita)                   |
| Other road injuries         | Male   | Early Neonatal | 80 plus | Global     | -1        | Health System Access 2 (unitless)                  |
| Other road injuries         | Male   | Early Neonatal | 80 plus | Global     | -1        | Sociodemographic Status                            |
| Other road injuries         | Male   | Early Neonatal | 80 plus | Global     | 0         | LDI (IS per capita)                                |
| Other road injuries         | Male   | Early Neonatal | 80 plus | Global     | 1         | Alcohol (litres per capita)                        |
| Other road injuries         | Male   | Early Neonatal | 80 plus | Global     | 1         | Log-transformed SEV scalar: Oth Road               |
| Other road injuries         | Male   | Early Neonatal | 80 plus | Global     | 1         | Rainfall Quintile 5 (proportion)                   |
| Other road injuries         | Male   | Early Neonatal | 80 plus | Global     | 1         | Vehicles - 2 wheels fraction (proportion)          |
| Other road injuries         | Male   | Early Neonatal | 80 plus | Global     | 1         | Vehicles - 2+4 wheels (per capita)                 |
| Other road injuries         | Male   | Early Neonatal | 80 plus | Data Rich  | -1        | Health System Access 2 (unitless)                  |
| Other road injuries         | Male   | Early Neonatal | 80 plus | Data Rich  | -1        | Sociodemographic Status                            |
| Other road injuries         | Male   | Early Neonatal | 80 plus | Data Rich  | 0         | LDI (IS per capita)                                |
| Other road injuries         | Male   | Early Neonatal | 80 plus | Data Rich  | 1         | Alcohol (litres per capita)                        |
| Other road injuries         | Male   | Early Neonatal | 80 plus | Data Rich  | 1         | Log-transformed SEV scalar: Oth Road               |
| Other road injuries         | Male   | Early Neonatal | 80 plus | Data Rich  | 1         | Rainfall Quintile 5 (proportion)                   |
| Other road injuries         | Male   | Early Neonatal | 80 plus | Data Rich  | 1         | Vehicles - 2 wheels fraction (proportion)          |

**Appendix Table 10: CODEm covariates used, level of covariate, and expected direction of covariate by cause, sex, and age**

| Cause                    | Sex    | Age start      | Age end | Model type | Direction | Covariate                                          |
|--------------------------|--------|----------------|---------|------------|-----------|----------------------------------------------------|
| Other road injuries      | Male   | Early Neonatal | 80 plus | Data Rich  | 1         | Vehicles - 2+4 wheels (per capita)                 |
| Other road injuries      | Female | Early Neonatal | 80 plus | Global     | -1        | Health System Access 2 (unitless)                  |
| Other road injuries      | Female | Early Neonatal | 80 plus | Global     | -1        | Sociodemographic Status                            |
| Other road injuries      | Female | Early Neonatal | 80 plus | Global     | 0         | LDI (IS per capita)                                |
| Other road injuries      | Female | Early Neonatal | 80 plus | Global     | 1         | Alcohol (litres per capita)                        |
| Other road injuries      | Female | Early Neonatal | 80 plus | Global     | 1         | Log-transformed SEV scalar: Oth Road               |
| Other road injuries      | Female | Early Neonatal | 80 plus | Global     | 1         | Rainfall Quintile 5 (proportion)                   |
| Other road injuries      | Female | Early Neonatal | 80 plus | Global     | 1         | Vehicles - 2 wheels fraction (proportion)          |
| Other road injuries      | Female | Early Neonatal | 80 plus | Global     | 1         | Vehicles - 2+4 wheels (per capita)                 |
| Other road injuries      | Female | Early Neonatal | 80 plus | Data Rich  | -1        | Health System Access 2 (unitless)                  |
| Other road injuries      | Female | Early Neonatal | 80 plus | Data Rich  | -1        | Sociodemographic Status                            |
| Other road injuries      | Female | Early Neonatal | 80 plus | Data Rich  | 0         | LDI (IS per capita)                                |
| Other road injuries      | Female | Early Neonatal | 80 plus | Data Rich  | 1         | Alcohol (litres per capita)                        |
| Other road injuries      | Female | Early Neonatal | 80 plus | Data Rich  | 1         | Log-transformed SEV scalar: Oth Road               |
| Other road injuries      | Female | Early Neonatal | 80 plus | Data Rich  | 1         | Rainfall Quintile 5 (proportion)                   |
| Other road injuries      | Female | Early Neonatal | 80 plus | Data Rich  | 1         | Vehicles - 2 wheels fraction (proportion)          |
| Other road injuries      | Female | Early Neonatal | 80 plus | Data Rich  | 1         | Vehicles - 2+4 wheels (per capita)                 |
| Other transport injuries | Male   | Early Neonatal | 80 plus | Global     | -1        | Education (years per capita)                       |
| Other transport injuries | Male   | Early Neonatal | 80 plus | Global     | -1        | Health System Access 2 (unitless)                  |
| Other transport injuries | Male   | Early Neonatal | 80 plus | Global     | 0         | LDI (IS per capita)                                |
| Other transport injuries | Male   | Early Neonatal | 80 plus | Global     | 0         | Population Density (300-500 ppl/sqkm, proportion)  |
| Other transport injuries | Male   | Early Neonatal | 80 plus | Global     | 0         | Population Density (500-1000 ppl/sqkm, proportion) |
| Other transport injuries | Male   | Early Neonatal | 80 plus | Global     | 0         | Sociodemographic Status                            |
| Other transport injuries | Male   | Early Neonatal | 80 plus | Global     | 1         | Alcohol (litres per capita)                        |
| Other transport injuries | Male   | Early Neonatal | 80 plus | Global     | 1         | Log-transformed SEV scalar: Oth Trans              |
| Other transport injuries | Male   | Early Neonatal | 80 plus | Global     | 1         | Rainfall Quintile 5 (proportion)                   |
| Other transport injuries | Male   | Early Neonatal | 80 plus | Global     | 1         | Vehicles - 2 wheels fraction (proportion)          |
| Other transport injuries | Male   | Early Neonatal | 80 plus | Global     | 1         | Vehicles - 2+4 wheels (per capita)                 |
| Other transport injuries | Male   | Early Neonatal | 80 plus | Data Rich  | -1        | Education (years per capita)                       |
| Other transport injuries | Male   | Early Neonatal | 80 plus | Data Rich  | -1        | Health System Access 2 (unitless)                  |
| Other transport injuries | Male   | Early Neonatal | 80 plus | Data Rich  | 0         | LDI (IS per capita)                                |
| Other transport injuries | Male   | Early Neonatal | 80 plus | Data Rich  | 0         | Population Density (300-500 ppl/sqkm, proportion)  |
| Other transport injuries | Male   | Early Neonatal | 80 plus | Data Rich  | 0         | Population Density (500-1000 ppl/sqkm, proportion) |
| Other transport injuries | Male   | Early Neonatal | 80 plus | Data Rich  | 0         | Sociodemographic Status                            |
| Other transport injuries | Male   | Early Neonatal | 80 plus | Data Rich  | 1         | Alcohol (litres per capita)                        |
| Other transport injuries | Male   | Early Neonatal | 80 plus | Data Rich  | 1         | Log-transformed SEV scalar: Oth Trans              |
| Other transport injuries | Male   | Early Neonatal | 80 plus | Data Rich  | 1         | Rainfall Quintile 5 (proportion)                   |
| Other transport injuries | Male   | Early Neonatal | 80 plus | Data Rich  | 1         | Vehicles - 2 wheels fraction (proportion)          |
| Other transport injuries | Male   | Early Neonatal | 80 plus | Data Rich  | 1         | Vehicles - 2+4 wheels (per capita)                 |
| Other transport injuries | Female | Early Neonatal | 80 plus | Global     | -1        | Education (years per capita)                       |
| Other transport injuries | Female | Early Neonatal | 80 plus | Global     | -1        | Health System Access 2 (unitless)                  |
| Other transport injuries | Female | Early Neonatal | 80 plus | Global     | 0         | LDI (IS per capita)                                |
| Other transport injuries | Female | Early Neonatal | 80 plus | Global     | 0         | Population Density (300-500 ppl/sqkm, proportion)  |
| Other transport injuries | Female | Early Neonatal | 80 plus | Global     | 0         | Population Density (500-1000 ppl/sqkm, proportion) |

**Appendix Table 10: CODEm covariates used, level of covariate, and expected direction of covariate by cause, sex, and age**

| Cause                    | Sex    | Age start      | Age end | Model type | Direction | Covariate                                          |
|--------------------------|--------|----------------|---------|------------|-----------|----------------------------------------------------|
| Other transport injuries | Female | Early Neonatal | 80 plus | Global     | 0         | Sociodemographic Status                            |
| Other transport injuries | Female | Early Neonatal | 80 plus | Global     | 1         | Alcohol (litres per capita)                        |
| Other transport injuries | Female | Early Neonatal | 80 plus | Global     | 1         | Log-transformed SEV scalar: Oth Trans              |
| Other transport injuries | Female | Early Neonatal | 80 plus | Global     | 1         | Rainfall Quintile 5 (proportion)                   |
| Other transport injuries | Female | Early Neonatal | 80 plus | Global     | 1         | Vehicles - 2 wheels fraction (proportion)          |
| Other transport injuries | Female | Early Neonatal | 80 plus | Global     | 1         | Vehicles - 2+4 wheels (per capita)                 |
| Other transport injuries | Female | Early Neonatal | 80 plus | Data Rich  | -1        | Education (years per capita)                       |
| Other transport injuries | Female | Early Neonatal | 80 plus | Data Rich  | -1        | Health System Access 2 (unitless)                  |
| Other transport injuries | Female | Early Neonatal | 80 plus | Data Rich  | 0         | LDI (IS per capita)                                |
| Other transport injuries | Female | Early Neonatal | 80 plus | Data Rich  | 0         | Population Density (300-500 ppl/sqkm, proportion)  |
| Other transport injuries | Female | Early Neonatal | 80 plus | Data Rich  | 0         | Population Density (500-1000 ppl/sqkm, proportion) |
| Other transport injuries | Female | Early Neonatal | 80 plus | Data Rich  | 0         | Sociodemographic Status                            |
| Other transport injuries | Female | Early Neonatal | 80 plus | Data Rich  | 1         | Alcohol (litres per capita)                        |
| Other transport injuries | Female | Early Neonatal | 80 plus | Data Rich  | 1         | Log-transformed SEV scalar: Oth Trans              |
| Other transport injuries | Female | Early Neonatal | 80 plus | Data Rich  | 1         | Rainfall Quintile 5 (proportion)                   |
| Other transport injuries | Female | Early Neonatal | 80 plus | Data Rich  | 1         | Vehicles - 2 wheels fraction (proportion)          |
| Other transport injuries | Female | Early Neonatal | 80 plus | Data Rich  | 1         | Vehicles - 2+4 wheels (per capita)                 |
| Falls                    | Male   | Early Neonatal | 80 plus | Global     | -1        | Health System Access 2 (unitless)                  |
| Falls                    | Male   | Early Neonatal | 80 plus | Global     | -1        | ln-Milk (kcal per capita)                          |
| Falls                    | Male   | Early Neonatal | 80 plus | Global     | 0         | LDI (IS per capita)                                |
| Falls                    | Male   | Early Neonatal | 80 plus | Global     | 0         | Sociodemographic Status                            |
| Falls                    | Male   | Early Neonatal | 80 plus | Global     | 1         | Alcohol (litres per capita)                        |
| Falls                    | Male   | Early Neonatal | 80 plus | Global     | 1         | Elevation Over 1500m (proportion)                  |
| Falls                    | Male   | Early Neonatal | 80 plus | Global     | 1         | Log-transformed SEV scalar: Falls                  |
| Falls                    | Male   | Early Neonatal | 80 plus | Data Rich  | -1        | Health System Access 2 (unitless)                  |
| Falls                    | Male   | Early Neonatal | 80 plus | Data Rich  | -1        | ln-Milk (kcal per capita)                          |
| Falls                    | Male   | Early Neonatal | 80 plus | Data Rich  | 0         | LDI (IS per capita)                                |
| Falls                    | Male   | Early Neonatal | 80 plus | Data Rich  | 0         | Sociodemographic Status                            |
| Falls                    | Male   | Early Neonatal | 80 plus | Data Rich  | 1         | Alcohol (litres per capita)                        |
| Falls                    | Male   | Early Neonatal | 80 plus | Data Rich  | 1         | Elevation Over 1500m (proportion)                  |
| Falls                    | Male   | Early Neonatal | 80 plus | Data Rich  | 1         | Log-transformed SEV scalar: Falls                  |
| Falls                    | Female | Early Neonatal | 80 plus | Global     | -1        | Health System Access 2 (unitless)                  |
| Falls                    | Female | Early Neonatal | 80 plus | Global     | -1        | ln-Milk (kcal per capita)                          |
| Falls                    | Female | Early Neonatal | 80 plus | Global     | 0         | LDI (IS per capita)                                |
| Falls                    | Female | Early Neonatal | 80 plus | Global     | 0         | Sociodemographic Status                            |
| Falls                    | Female | Early Neonatal | 80 plus | Global     | 1         | Alcohol (litres per capita)                        |
| Falls                    | Female | Early Neonatal | 80 plus | Global     | 1         | Elevation Over 1500m (proportion)                  |
| Falls                    | Female | Early Neonatal | 80 plus | Global     | 1         | Log-transformed SEV scalar: Falls                  |
| Falls                    | Female | Early Neonatal | 80 plus | Data Rich  | -1        | Health System Access 2 (unitless)                  |
| Falls                    | Female | Early Neonatal | 80 plus | Data Rich  | -1        | ln-Milk (kcal per capita)                          |
| Falls                    | Female | Early Neonatal | 80 plus | Data Rich  | 0         | LDI (IS per capita)                                |
| Falls                    | Female | Early Neonatal | 80 plus | Data Rich  | 0         | Sociodemographic Status                            |
| Falls                    | Female | Early Neonatal | 80 plus | Data Rich  | 1         | Alcohol (litres per capita)                        |
| Falls                    | Female | Early Neonatal | 80 plus | Data Rich  | 1         | Elevation Over 1500m (proportion)                  |

**Appendix Table 10: CODEm covariates used, level of covariate, and expected direction of covariate by cause, sex, and age**

| Cause                          | Sex    | Age start      | Age end | Model type | Direction | Covariate                                   |
|--------------------------------|--------|----------------|---------|------------|-----------|---------------------------------------------|
| Falls                          | Female | Early Neonatal | 80 plus | Data Rich  | 1         | Log-transformed SEV scalar: Falls           |
| Drowning                       | Male   | Early Neonatal | 80 plus | Global     | -1        | Education (years per capita)                |
| Drowning                       | Male   | Early Neonatal | 80 plus | Global     | -1        | Landlocked Nation (binary)                  |
| Drowning                       | Male   | Early Neonatal | 80 plus | Global     | -1        | Rainfall Quintile 1 (proportion)            |
| Drowning                       | Male   | Early Neonatal | 80 plus | Global     | -1        | Sociodemographic Status                     |
| Drowning                       | Male   | Early Neonatal | 80 plus | Global     | 0         | LDI (IS per capita)                         |
| Drowning                       | Male   | Early Neonatal | 80 plus | Global     | 1         | Alcohol (litres per capita)                 |
| Drowning                       | Male   | Early Neonatal | 80 plus | Global     | 1         | Coastal Population within 10km (proportion) |
| Drowning                       | Male   | Early Neonatal | 80 plus | Global     | 1         | Elevation Under 100m (proportion)           |
| Drowning                       | Male   | Early Neonatal | 80 plus | Global     | 1         | Log-transformed SEV scalar: Drown           |
| Drowning                       | Male   | Early Neonatal | 80 plus | Global     | 1         | Rainfall Quintile 5 (proportion)            |
| Drowning                       | Male   | Early Neonatal | 80 plus | Data Rich  | -1        | Education (years per capita)                |
| Drowning                       | Male   | Early Neonatal | 80 plus | Data Rich  | -1        | Landlocked Nation (binary)                  |
| Drowning                       | Male   | Early Neonatal | 80 plus | Data Rich  | -1        | Rainfall Quintile 1 (proportion)            |
| Drowning                       | Male   | Early Neonatal | 80 plus | Data Rich  | -1        | Sociodemographic Status                     |
| Drowning                       | Male   | Early Neonatal | 80 plus | Data Rich  | 0         | LDI (IS per capita)                         |
| Drowning                       | Male   | Early Neonatal | 80 plus | Data Rich  | 1         | Alcohol (litres per capita)                 |
| Drowning                       | Male   | Early Neonatal | 80 plus | Data Rich  | 1         | Coastal Population within 10km (proportion) |
| Drowning                       | Male   | Early Neonatal | 80 plus | Data Rich  | 1         | Elevation Under 100m (proportion)           |
| Drowning                       | Male   | Early Neonatal | 80 plus | Data Rich  | 1         | Log-transformed SEV scalar: Drown           |
| Drowning                       | Male   | Early Neonatal | 80 plus | Data Rich  | 1         | Rainfall Quintile 5 (proportion)            |
| Drowning                       | Female | Early Neonatal | 80 plus | Global     | -1        | Education (years per capita)                |
| Drowning                       | Female | Early Neonatal | 80 plus | Global     | -1        | Landlocked Nation (binary)                  |
| Drowning                       | Female | Early Neonatal | 80 plus | Global     | -1        | Rainfall Quintile 1 (proportion)            |
| Drowning                       | Female | Early Neonatal | 80 plus | Global     | -1        | Sociodemographic Status                     |
| Drowning                       | Female | Early Neonatal | 80 plus | Global     | 0         | LDI (IS per capita)                         |
| Drowning                       | Female | Early Neonatal | 80 plus | Global     | 1         | Alcohol (litres per capita)                 |
| Drowning                       | Female | Early Neonatal | 80 plus | Global     | 1         | Coastal Population within 10km (proportion) |
| Drowning                       | Female | Early Neonatal | 80 plus | Global     | 1         | Elevation Under 100m (proportion)           |
| Drowning                       | Female | Early Neonatal | 80 plus | Global     | 1         | Log-transformed SEV scalar: Drown           |
| Drowning                       | Female | Early Neonatal | 80 plus | Global     | 1         | Rainfall Quintile 5 (proportion)            |
| Drowning                       | Female | Early Neonatal | 80 plus | Data Rich  | -1        | Education (years per capita)                |
| Drowning                       | Female | Early Neonatal | 80 plus | Data Rich  | -1        | Landlocked Nation (binary)                  |
| Drowning                       | Female | Early Neonatal | 80 plus | Data Rich  | -1        | Rainfall Quintile 1 (proportion)            |
| Drowning                       | Female | Early Neonatal | 80 plus | Data Rich  | -1        | Sociodemographic Status                     |
| Drowning                       | Female | Early Neonatal | 80 plus | Data Rich  | 0         | LDI (IS per capita)                         |
| Drowning                       | Female | Early Neonatal | 80 plus | Data Rich  | 1         | Alcohol (litres per capita)                 |
| Drowning                       | Female | Early Neonatal | 80 plus | Data Rich  | 1         | Coastal Population within 10km (proportion) |
| Drowning                       | Female | Early Neonatal | 80 plus | Data Rich  | 1         | Elevation Under 100m (proportion)           |
| Drowning                       | Female | Early Neonatal | 80 plus | Data Rich  | 1         | Log-transformed SEV scalar: Drown           |
| Drowning                       | Female | Early Neonatal | 80 plus | Data Rich  | 1         | Rainfall Quintile 5 (proportion)            |
| Fire, heat, and hot substances | Male   | Early Neonatal | 80 plus | Global     | -1        | Education (years per capita)                |
| Fire, heat, and hot substances | Male   | Early Neonatal | 80 plus | Global     | -1        | Health System Access 2 (unitless)           |
| Fire, heat, and hot substances | Male   | Early Neonatal | 80 plus | Global     | -1        | Sociodemographic Status                     |

**Appendix Table 10: CODEm covariates used, level of covariate, and expected direction of covariate by cause, sex, and age**

| Cause                          | Sex    | Age start      | Age end | Model type | Direction | Covariate                                           |
|--------------------------------|--------|----------------|---------|------------|-----------|-----------------------------------------------------|
| Fire, heat, and hot substances | Male   | Early Neonatal | 80 plus | Global     | 0         | LDI (IS per capita)                                 |
| Fire, heat, and hot substances | Male   | Early Neonatal | 80 plus | Global     | 0         | Population Density (over 1000 ppl/sqkm, proportion) |
| Fire, heat, and hot substances | Male   | Early Neonatal | 80 plus | Global     | 1         | Alcohol (litres per capita)                         |
| Fire, heat, and hot substances | Male   | Early Neonatal | 80 plus | Global     | 1         | Indoor Air Pollution (Biomass Cooking)              |
| Fire, heat, and hot substances | Male   | Early Neonatal | 80 plus | Global     | 1         | Log-transformed SEV scalar: Fire                    |
| Fire, heat, and hot substances | Male   | Early Neonatal | 80 plus | Global     | 1         | Tobacco (cigarettes per capita)                     |
| Fire, heat, and hot substances | Male   | Early Neonatal | 80 plus | Data Rich  | -1        | Education (years per capita)                        |
| Fire, heat, and hot substances | Male   | Early Neonatal | 80 plus | Data Rich  | -1        | Health System Access 2 (unitless)                   |
| Fire, heat, and hot substances | Male   | Early Neonatal | 80 plus | Data Rich  | -1        | Sociodemographic Status                             |
| Fire, heat, and hot substances | Male   | Early Neonatal | 80 plus | Data Rich  | 0         | LDI (IS per capita)                                 |
| Fire, heat, and hot substances | Male   | Early Neonatal | 80 plus | Data Rich  | 0         | Population Density (over 1000 ppl/sqkm, proportion) |
| Fire, heat, and hot substances | Male   | Early Neonatal | 80 plus | Data Rich  | 1         | Alcohol (litres per capita)                         |
| Fire, heat, and hot substances | Male   | Early Neonatal | 80 plus | Data Rich  | 1         | Indoor Air Pollution (Biomass Cooking)              |
| Fire, heat, and hot substances | Male   | Early Neonatal | 80 plus | Data Rich  | 1         | Log-transformed SEV scalar: Fire                    |
| Fire, heat, and hot substances | Male   | Early Neonatal | 80 plus | Data Rich  | 1         | Tobacco (cigarettes per capita)                     |
| Fire, heat, and hot substances | Female | Early Neonatal | 80 plus | Global     | -1        | Education (years per capita)                        |
| Fire, heat, and hot substances | Female | Early Neonatal | 80 plus | Global     | -1        | Health System Access 2 (unitless)                   |
| Fire, heat, and hot substances | Female | Early Neonatal | 80 plus | Global     | -1        | Sociodemographic Status                             |
| Fire, heat, and hot substances | Female | Early Neonatal | 80 plus | Global     | 0         | LDI (IS per capita)                                 |
| Fire, heat, and hot substances | Female | Early Neonatal | 80 plus | Global     | 0         | Population Density (over 1000 ppl/sqkm, proportion) |
| Fire, heat, and hot substances | Female | Early Neonatal | 80 plus | Global     | 1         | Alcohol (litres per capita)                         |
| Fire, heat, and hot substances | Female | Early Neonatal | 80 plus | Global     | 1         | Indoor Air Pollution (Biomass Cooking)              |
| Fire, heat, and hot substances | Female | Early Neonatal | 80 plus | Global     | 1         | Log-transformed SEV scalar: Fire                    |
| Fire, heat, and hot substances | Female | Early Neonatal | 80 plus | Global     | 1         | Tobacco (cigarettes per capita)                     |
| Fire, heat, and hot substances | Female | Early Neonatal | 80 plus | Data Rich  | -1        | Education (years per capita)                        |
| Fire, heat, and hot substances | Female | Early Neonatal | 80 plus | Data Rich  | -1        | Health System Access 2 (unitless)                   |
| Fire, heat, and hot substances | Female | Early Neonatal | 80 plus | Data Rich  | -1        | Sociodemographic Status                             |
| Fire, heat, and hot substances | Female | Early Neonatal | 80 plus | Data Rich  | 0         | LDI (IS per capita)                                 |
| Fire, heat, and hot substances | Female | Early Neonatal | 80 plus | Data Rich  | 0         | Population Density (over 1000 ppl/sqkm, proportion) |
| Fire, heat, and hot substances | Female | Early Neonatal | 80 plus | Data Rich  | 1         | Alcohol (litres per capita)                         |
| Fire, heat, and hot substances | Female | Early Neonatal | 80 plus | Data Rich  | 1         | Indoor Air Pollution (Biomass Cooking)              |
| Fire, heat, and hot substances | Female | Early Neonatal | 80 plus | Data Rich  | 1         | Log-transformed SEV scalar: Fire                    |
| Fire, heat, and hot substances | Female | Early Neonatal | 80 plus | Data Rich  | 1         | Tobacco (cigarettes per capita)                     |
| Poisonings                     | Male   | Early Neonatal | 80 plus | Global     | -1        | Education (years per capita)                        |
| Poisonings                     | Male   | Early Neonatal | 80 plus | Global     | -1        | Health System Access 2 (unitless)                   |
| Poisonings                     | Male   | Early Neonatal | 80 plus | Global     | -1        | Sociodemographic Status                             |
| Poisonings                     | Male   | Early Neonatal | 80 plus | Global     | 0         | LDI (IS per capita)                                 |
| Poisonings                     | Male   | Early Neonatal | 80 plus | Global     | 0         | Population Density (over 1000 ppl/sqkm, proportion) |
| Poisonings                     | Male   | Early Neonatal | 80 plus | Global     | 0         | Population Density (under 150 ppl/sqkm, proportion) |
| Poisonings                     | Male   | Early Neonatal | 80 plus | Global     | 1         | Log-transformed SEV scalar: Poison                  |
| Poisonings                     | Male   | Early Neonatal | 80 plus | Global     | 1         | Opium Cultivation (binary)                          |
| Poisonings                     | Male   | Early Neonatal | 80 plus | Data Rich  | -1        | Education (years per capita)                        |
| Poisonings                     | Male   | Early Neonatal | 80 plus | Data Rich  | -1        | Health System Access 2 (unitless)                   |
| Poisonings                     | Male   | Early Neonatal | 80 plus | Data Rich  | -1        | Sociodemographic Status                             |

**Appendix Table 10: CODEm covariates used, level of covariate, and expected direction of covariate by cause, sex, and age**

| Cause                          | Sex    | Age start      | Age end | Model type | Direction | Covariate                                           |
|--------------------------------|--------|----------------|---------|------------|-----------|-----------------------------------------------------|
| Poisonings                     | Male   | Early Neonatal | 80 plus | Data Rich  | 0         | LDI (IS per capita)                                 |
| Poisonings                     | Male   | Early Neonatal | 80 plus | Data Rich  | 0         | Population Density (over 1000 ppl/sqkm, proportion) |
| Poisonings                     | Male   | Early Neonatal | 80 plus | Data Rich  | 0         | Population Density (under 150 ppl/sqkm, proportion) |
| Poisonings                     | Male   | Early Neonatal | 80 plus | Data Rich  | 1         | Log-transformed SEV scalar: Poison                  |
| Poisonings                     | Male   | Early Neonatal | 80 plus | Data Rich  | 1         | Opium Cultivation (binary)                          |
| Poisonings                     | Female | Early Neonatal | 80 plus | Global     | -1        | Education (years per capita)                        |
| Poisonings                     | Female | Early Neonatal | 80 plus | Global     | -1        | Health System Access 2 (unitless)                   |
| Poisonings                     | Female | Early Neonatal | 80 plus | Global     | -1        | Sociodemographic Status                             |
| Poisonings                     | Female | Early Neonatal | 80 plus | Global     | 0         | LDI (IS per capita)                                 |
| Poisonings                     | Female | Early Neonatal | 80 plus | Global     | 0         | Population Density (over 1000 ppl/sqkm, proportion) |
| Poisonings                     | Female | Early Neonatal | 80 plus | Global     | 0         | Population Density (under 150 ppl/sqkm, proportion) |
| Poisonings                     | Female | Early Neonatal | 80 plus | Global     | 1         | Log-transformed SEV scalar: Poison                  |
| Poisonings                     | Female | Early Neonatal | 80 plus | Global     | 1         | Opium Cultivation (binary)                          |
| Poisonings                     | Female | Early Neonatal | 80 plus | Data Rich  | -1        | Education (years per capita)                        |
| Poisonings                     | Female | Early Neonatal | 80 plus | Data Rich  | -1        | Health System Access 2 (unitless)                   |
| Poisonings                     | Female | Early Neonatal | 80 plus | Data Rich  | -1        | Sociodemographic Status                             |
| Poisonings                     | Female | Early Neonatal | 80 plus | Data Rich  | 0         | LDI (IS per capita)                                 |
| Poisonings                     | Female | Early Neonatal | 80 plus | Data Rich  | 0         | Population Density (over 1000 ppl/sqkm, proportion) |
| Poisonings                     | Female | Early Neonatal | 80 plus | Data Rich  | 0         | Population Density (under 150 ppl/sqkm, proportion) |
| Poisonings                     | Female | Early Neonatal | 80 plus | Data Rich  | 1         | Log-transformed SEV scalar: Poison                  |
| Poisonings                     | Female | Early Neonatal | 80 plus | Data Rich  | 1         | Opium Cultivation (binary)                          |
| Unintentional firearm injuries | Male   | Early Neonatal | 80 plus | Global     | -1        | Education (years per capita)                        |
| Unintentional firearm injuries | Male   | Early Neonatal | 80 plus | Global     | -1        | Health System Access (unitless)                     |
| Unintentional firearm injuries | Male   | Early Neonatal | 80 plus | Global     | -1        | Sociodemographic Status                             |
| Unintentional firearm injuries | Male   | Early Neonatal | 80 plus | Global     | 0         | LDI (IS per capita)                                 |
| Unintentional firearm injuries | Male   | Early Neonatal | 80 plus | Global     | 0         | Population Density (over 1000 ppl/sqkm, proportion) |
| Unintentional firearm injuries | Male   | Early Neonatal | 80 plus | Global     | 0         | Population Density (under 150 ppl/sqkm, proportion) |
| Unintentional firearm injuries | Male   | Early Neonatal | 80 plus | Global     | 1         | Alcohol (litres per capita)                         |
| Unintentional firearm injuries | Male   | Early Neonatal | 80 plus | Global     | 1         | Log-transformed SEV scalar: Mech Gun                |
| Unintentional firearm injuries | Male   | Early Neonatal | 80 plus | Data Rich  | -1        | Education (years per capita)                        |
| Unintentional firearm injuries | Male   | Early Neonatal | 80 plus | Data Rich  | -1        | Health System Access (unitless)                     |
| Unintentional firearm injuries | Male   | Early Neonatal | 80 plus | Data Rich  | -1        | Sociodemographic Status                             |
| Unintentional firearm injuries | Male   | Early Neonatal | 80 plus | Data Rich  | 0         | LDI (IS per capita)                                 |
| Unintentional firearm injuries | Male   | Early Neonatal | 80 plus | Data Rich  | 0         | Population Density (over 1000 ppl/sqkm, proportion) |
| Unintentional firearm injuries | Male   | Early Neonatal | 80 plus | Data Rich  | 0         | Population Density (under 150 ppl/sqkm, proportion) |
| Unintentional firearm injuries | Male   | Early Neonatal | 80 plus | Data Rich  | 1         | Alcohol (litres per capita)                         |
| Unintentional firearm injuries | Male   | Early Neonatal | 80 plus | Data Rich  | 1         | Log-transformed SEV scalar: Mech Gun                |
| Unintentional firearm injuries | Female | Early Neonatal | 80 plus | Global     | -1        | Education (years per capita)                        |
| Unintentional firearm injuries | Female | Early Neonatal | 80 plus | Global     | -1        | Health System Access (unitless)                     |
| Unintentional firearm injuries | Female | Early Neonatal | 80 plus | Global     | -1        | Sociodemographic Status                             |
| Unintentional firearm injuries | Female | Early Neonatal | 80 plus | Global     | 0         | LDI (IS per capita)                                 |
| Unintentional firearm injuries | Female | Early Neonatal | 80 plus | Global     | 0         | Population Density (over 1000 ppl/sqkm, proportion) |
| Unintentional firearm injuries | Female | Early Neonatal | 80 plus | Global     | 0         | Population Density (under 150 ppl/sqkm, proportion) |
| Unintentional firearm injuries | Female | Early Neonatal | 80 plus | Global     | 1         | Alcohol (litres per capita)                         |

**Appendix Table 10: CODEm covariates used, level of covariate, and expected direction of covariate by cause, sex, and age**

| Cause                               | Sex    | Age start      | Age end | Model type | Direction | Covariate                                           |
|-------------------------------------|--------|----------------|---------|------------|-----------|-----------------------------------------------------|
| Unintentional firearm injuries      | Female | Early Neonatal | 80 plus | Global     | 1         | Log-transformed SEV scalar: Mech Gun                |
| Unintentional firearm injuries      | Female | Early Neonatal | 80 plus | Data Rich  | -1        | Education (years per capita)                        |
| Unintentional firearm injuries      | Female | Early Neonatal | 80 plus | Data Rich  | -1        | Health System Access (unitless)                     |
| Unintentional firearm injuries      | Female | Early Neonatal | 80 plus | Data Rich  | -1        | Sociodemographic Status                             |
| Unintentional firearm injuries      | Female | Early Neonatal | 80 plus | Data Rich  | 0         | LDI (IS per capita)                                 |
| Unintentional firearm injuries      | Female | Early Neonatal | 80 plus | Data Rich  | 0         | Population Density (over 1000 ppl/sqkm, proportion) |
| Unintentional firearm injuries      | Female | Early Neonatal | 80 plus | Data Rich  | 0         | Population Density (under 150 ppl/sqkm, proportion) |
| Unintentional firearm injuries      | Female | Early Neonatal | 80 plus | Data Rich  | 1         | Alcohol (litres per capita)                         |
| Unintentional firearm injuries      | Female | Early Neonatal | 80 plus | Data Rich  | 1         | Log-transformed SEV scalar: Mech Gun                |
| Unintentional suffocation           | Male   | Early Neonatal | 80 plus | Global     | -1        | Education (years per capita)                        |
| Unintentional suffocation           | Male   | Early Neonatal | 80 plus | Global     | -1        | Health System Access 2 (unitless)                   |
| Unintentional suffocation           | Male   | Early Neonatal | 80 plus | Global     | 0         | LDI (IS per capita)                                 |
| Unintentional suffocation           | Male   | Early Neonatal | 80 plus | Global     | 0         | Population Density (over 1000 ppl/sqkm, proportion) |
| Unintentional suffocation           | Male   | Early Neonatal | 80 plus | Global     | 0         | Population Density (under 150 ppl/sqkm, proportion) |
| Unintentional suffocation           | Male   | Early Neonatal | 80 plus | Global     | 0         | Sociodemographic Status                             |
| Unintentional suffocation           | Male   | Early Neonatal | 80 plus | Global     | 1         | Alcohol (litres per capita)                         |
| Unintentional suffocation           | Male   | Early Neonatal | 80 plus | Global     | 1         | Log-transformed SEV scalar: Mech Suff               |
| Unintentional suffocation           | Male   | Early Neonatal | 80 plus | Data Rich  | -1        | Education (years per capita)                        |
| Unintentional suffocation           | Male   | Early Neonatal | 80 plus | Data Rich  | -1        | Health System Access 2 (unitless)                   |
| Unintentional suffocation           | Male   | Early Neonatal | 80 plus | Data Rich  | 0         | LDI (IS per capita)                                 |
| Unintentional suffocation           | Male   | Early Neonatal | 80 plus | Data Rich  | 0         | Population Density (over 1000 ppl/sqkm, proportion) |
| Unintentional suffocation           | Male   | Early Neonatal | 80 plus | Data Rich  | 0         | Population Density (under 150 ppl/sqkm, proportion) |
| Unintentional suffocation           | Male   | Early Neonatal | 80 plus | Data Rich  | 0         | Sociodemographic Status                             |
| Unintentional suffocation           | Male   | Early Neonatal | 80 plus | Data Rich  | 1         | Alcohol (litres per capita)                         |
| Unintentional suffocation           | Male   | Early Neonatal | 80 plus | Data Rich  | 1         | Log-transformed SEV scalar: Mech Suff               |
| Unintentional suffocation           | Female | Early Neonatal | 80 plus | Global     | -1        | Education (years per capita)                        |
| Unintentional suffocation           | Female | Early Neonatal | 80 plus | Global     | -1        | Health System Access 2 (unitless)                   |
| Unintentional suffocation           | Female | Early Neonatal | 80 plus | Global     | 0         | LDI (IS per capita)                                 |
| Unintentional suffocation           | Female | Early Neonatal | 80 plus | Global     | 0         | Population Density (over 1000 ppl/sqkm, proportion) |
| Unintentional suffocation           | Female | Early Neonatal | 80 plus | Global     | 0         | Population Density (under 150 ppl/sqkm, proportion) |
| Unintentional suffocation           | Female | Early Neonatal | 80 plus | Global     | 0         | Sociodemographic Status                             |
| Unintentional suffocation           | Female | Early Neonatal | 80 plus | Global     | 1         | Alcohol (litres per capita)                         |
| Unintentional suffocation           | Female | Early Neonatal | 80 plus | Global     | 1         | Log-transformed SEV scalar: Mech Suff               |
| Unintentional suffocation           | Female | Early Neonatal | 80 plus | Data Rich  | -1        | Education (years per capita)                        |
| Unintentional suffocation           | Female | Early Neonatal | 80 plus | Data Rich  | -1        | Health System Access 2 (unitless)                   |
| Unintentional suffocation           | Female | Early Neonatal | 80 plus | Data Rich  | 0         | LDI (IS per capita)                                 |
| Unintentional suffocation           | Female | Early Neonatal | 80 plus | Data Rich  | 0         | Population Density (over 1000 ppl/sqkm, proportion) |
| Unintentional suffocation           | Female | Early Neonatal | 80 plus | Data Rich  | 0         | Population Density (under 150 ppl/sqkm, proportion) |
| Unintentional suffocation           | Female | Early Neonatal | 80 plus | Data Rich  | 0         | Sociodemographic Status                             |
| Unintentional suffocation           | Female | Early Neonatal | 80 plus | Data Rich  | 1         | Alcohol (litres per capita)                         |
| Unintentional suffocation           | Female | Early Neonatal | 80 plus | Data Rich  | 1         | Log-transformed SEV scalar: Mech Suff               |
| Other exposure to mechanical forces | Male   | Early Neonatal | 80 plus | Global     | -1        | Education (years per capita)                        |
| Other exposure to mechanical forces | Male   | Early Neonatal | 80 plus | Global     | -1        | Health System Access (unitless)                     |
| Other exposure to mechanical forces | Male   | Early Neonatal | 80 plus | Global     | -1        | Sociodemographic Status                             |

**Appendix Table 10: CODEm covariates used, level of covariate, and expected direction of covariate by cause, sex, and age**

| Cause                                | Sex    | Age start      | Age end | Model type | Direction | Covariate                                           |
|--------------------------------------|--------|----------------|---------|------------|-----------|-----------------------------------------------------|
| Other exposure to mechanical forces  | Male   | Early Neonatal | 80 plus | Global     | 0         | LDI (IS per capita)                                 |
| Other exposure to mechanical forces  | Male   | Early Neonatal | 80 plus | Global     | 0         | Population Density (over 1000 ppl/sqkm, proportion) |
| Other exposure to mechanical forces  | Male   | Early Neonatal | 80 plus | Global     | 0         | Population Density (under 150 ppl/sqkm, proportion) |
| Other exposure to mechanical forces  | Male   | Early Neonatal | 80 plus | Global     | 1         | Alcohol (litres per capita)                         |
| Other exposure to mechanical forces  | Male   | Early Neonatal | 80 plus | Global     | 1         | Log-transformed SEV scalar: Oth Mech                |
| Other exposure to mechanical forces  | Male   | Early Neonatal | 80 plus | Data Rich  | -1        | Education (years per capita)                        |
| Other exposure to mechanical forces  | Male   | Early Neonatal | 80 plus | Data Rich  | -1        | Health System Access (unitless)                     |
| Other exposure to mechanical forces  | Male   | Early Neonatal | 80 plus | Data Rich  | -1        | Sociodemographic Status                             |
| Other exposure to mechanical forces  | Male   | Early Neonatal | 80 plus | Data Rich  | 0         | LDI (IS per capita)                                 |
| Other exposure to mechanical forces  | Male   | Early Neonatal | 80 plus | Data Rich  | 0         | Population Density (over 1000 ppl/sqkm, proportion) |
| Other exposure to mechanical forces  | Male   | Early Neonatal | 80 plus | Data Rich  | 0         | Population Density (under 150 ppl/sqkm, proportion) |
| Other exposure to mechanical forces  | Male   | Early Neonatal | 80 plus | Data Rich  | 1         | Alcohol (litres per capita)                         |
| Other exposure to mechanical forces  | Male   | Early Neonatal | 80 plus | Data Rich  | 1         | Log-transformed SEV scalar: Oth Mech                |
| Other exposure to mechanical forces  | Female | Early Neonatal | 80 plus | Global     | -1        | Education (years per capita)                        |
| Other exposure to mechanical forces  | Female | Early Neonatal | 80 plus | Global     | -1        | Health System Access (unitless)                     |
| Other exposure to mechanical forces  | Female | Early Neonatal | 80 plus | Global     | -1        | Sociodemographic Status                             |
| Other exposure to mechanical forces  | Female | Early Neonatal | 80 plus | Global     | 0         | LDI (IS per capita)                                 |
| Other exposure to mechanical forces  | Female | Early Neonatal | 80 plus | Global     | 0         | Population Density (over 1000 ppl/sqkm, proportion) |
| Other exposure to mechanical forces  | Female | Early Neonatal | 80 plus | Global     | 0         | Population Density (under 150 ppl/sqkm, proportion) |
| Other exposure to mechanical forces  | Female | Early Neonatal | 80 plus | Global     | 1         | Alcohol (litres per capita)                         |
| Other exposure to mechanical forces  | Female | Early Neonatal | 80 plus | Global     | 1         | Log-transformed SEV scalar: Oth Mech                |
| Other exposure to mechanical forces  | Female | Early Neonatal | 80 plus | Data Rich  | -1        | Education (years per capita)                        |
| Other exposure to mechanical forces  | Female | Early Neonatal | 80 plus | Data Rich  | -1        | Health System Access (unitless)                     |
| Other exposure to mechanical forces  | Female | Early Neonatal | 80 plus | Data Rich  | -1        | Sociodemographic Status                             |
| Other exposure to mechanical forces  | Female | Early Neonatal | 80 plus | Data Rich  | 0         | LDI (IS per capita)                                 |
| Other exposure to mechanical forces  | Female | Early Neonatal | 80 plus | Data Rich  | 0         | Population Density (over 1000 ppl/sqkm, proportion) |
| Other exposure to mechanical forces  | Female | Early Neonatal | 80 plus | Data Rich  | 0         | Population Density (under 150 ppl/sqkm, proportion) |
| Other exposure to mechanical forces  | Female | Early Neonatal | 80 plus | Data Rich  | 1         | Alcohol (litres per capita)                         |
| Other exposure to mechanical forces  | Female | Early Neonatal | 80 plus | Data Rich  | 1         | Log-transformed SEV scalar: Oth Mech                |
| Adverse effects of medical treatment | Male   | Early Neonatal | 80 plus | Global     | 0         | Health System Access 2 (unitless)                   |
| Adverse effects of medical treatment | Male   | Early Neonatal | 80 plus | Global     | 0         | LDI (IS per capita)                                 |
| Adverse effects of medical treatment | Male   | Early Neonatal | 80 plus | Global     | 0         | Sociodemographic Status                             |
| Adverse effects of medical treatment | Male   | Early Neonatal | 80 plus | Data Rich  | 0         | Health System Access 2 (unitless)                   |
| Adverse effects of medical treatment | Male   | Early Neonatal | 80 plus | Data Rich  | 0         | LDI (IS per capita)                                 |
| Adverse effects of medical treatment | Male   | Early Neonatal | 80 plus | Data Rich  | 0         | Sociodemographic Status                             |
| Adverse effects of medical treatment | Female | Early Neonatal | 80 plus | Global     | 0         | Health System Access 2 (unitless)                   |
| Adverse effects of medical treatment | Female | Early Neonatal | 80 plus | Global     | 0         | LDI (IS per capita)                                 |
| Adverse effects of medical treatment | Female | Early Neonatal | 80 plus | Global     | 0         | Sociodemographic Status                             |
| Adverse effects of medical treatment | Female | Early Neonatal | 80 plus | Data Rich  | 0         | Health System Access 2 (unitless)                   |
| Adverse effects of medical treatment | Female | Early Neonatal | 80 plus | Data Rich  | 0         | LDI (IS per capita)                                 |
| Adverse effects of medical treatment | Female | Early Neonatal | 80 plus | Data Rich  | 0         | Sociodemographic Status                             |
| Animal contact                       | Male   | Early Neonatal | 80 plus | Global     | -1        | Education (years per capita)                        |
| Animal contact                       | Male   | Early Neonatal | 80 plus | Global     | -1        | Health System Access 2 (unitless)                   |
| Animal contact                       | Male   | Early Neonatal | 80 plus | Global     | -1        | Sociodemographic Status                             |



**Appendix Table 10: CODEm covariates used, level of covariate, and expected direction of covariate by cause, sex, and age**

| Cause          | Sex    | Age start      | Age end | Model type | Direction | Covariate                                           |
|----------------|--------|----------------|---------|------------|-----------|-----------------------------------------------------|
| Animal contact | Male   | Early Neonatal | 80 plus | Global     | 0         | Elevation Over 1500m (proportion)                   |
| Animal contact | Male   | Early Neonatal | 80 plus | Global     | 0         | Elevation Under 100m (proportion)                   |
| Animal contact | Male   | Early Neonatal | 80 plus | Global     | 0         | LDI (IS per capita)                                 |
| Animal contact | Male   | Early Neonatal | 80 plus | Global     | 0         | Population Density (over 1000 ppl/sqkm, proportion) |
| Animal contact | Male   | Early Neonatal | 80 plus | Global     | 0         | Population Density (under 150 ppl/sqkm, proportion) |
| Animal contact | Male   | Early Neonatal | 80 plus | Global     | 0         | Vehicles - 4 wheels (per capita)                    |
| Animal contact | Male   | Early Neonatal | 80 plus | Global     | 1         | Alcohol (litres per capita)                         |
| Animal contact | Male   | Early Neonatal | 80 plus | Global     | 1         | Log-transformed SEV scalar: Animal                  |
| Animal contact | Male   | Early Neonatal | 80 plus | Global     | 1         | Population 15 to 30 (proportion)                    |
| Animal contact | Male   | Early Neonatal | 80 plus | Global     | 1         | Vehicles - 2 wheels (per capita)                    |
| Animal contact | Male   | Early Neonatal | 80 plus | Data Rich  | -1        | Education (years per capita)                        |
| Animal contact | Male   | Early Neonatal | 80 plus | Data Rich  | -1        | Health System Access 2 (unitless)                   |
| Animal contact | Male   | Early Neonatal | 80 plus | Data Rich  | -1        | Sociodemographic Status                             |
| Animal contact | Male   | Early Neonatal | 80 plus | Data Rich  | 0         | Elevation Over 1500m (proportion)                   |
| Animal contact | Male   | Early Neonatal | 80 plus | Data Rich  | 0         | Elevation Under 100m (proportion)                   |
| Animal contact | Male   | Early Neonatal | 80 plus | Data Rich  | 0         | LDI (IS per capita)                                 |
| Animal contact | Male   | Early Neonatal | 80 plus | Data Rich  | 0         | Population Density (over 1000 ppl/sqkm, proportion) |
| Animal contact | Male   | Early Neonatal | 80 plus | Data Rich  | 0         | Population Density (under 150 ppl/sqkm, proportion) |
| Animal contact | Male   | Early Neonatal | 80 plus | Data Rich  | 0         | Vehicles - 4 wheels (per capita)                    |
| Animal contact | Male   | Early Neonatal | 80 plus | Data Rich  | 1         | Alcohol (litres per capita)                         |
| Animal contact | Male   | Early Neonatal | 80 plus | Data Rich  | 1         | Log-transformed SEV scalar: Animal                  |
| Animal contact | Male   | Early Neonatal | 80 plus | Data Rich  | 1         | Population 15 to 30 (proportion)                    |
| Animal contact | Male   | Early Neonatal | 80 plus | Data Rich  | 1         | Vehicles - 2 wheels (per capita)                    |
| Animal contact | Female | Early Neonatal | 80 plus | Global     | -1        | Education (years per capita)                        |
| Animal contact | Female | Early Neonatal | 80 plus | Global     | -1        | Health System Access 2 (unitless)                   |
| Animal contact | Female | Early Neonatal | 80 plus | Global     | -1        | Sociodemographic Status                             |
| Animal contact | Female | Early Neonatal | 80 plus | Global     | 0         | Elevation Over 1500m (proportion)                   |
| Animal contact | Female | Early Neonatal | 80 plus | Global     | 0         | Elevation Under 100m (proportion)                   |
| Animal contact | Female | Early Neonatal | 80 plus | Global     | 0         | LDI (IS per capita)                                 |
| Animal contact | Female | Early Neonatal | 80 plus | Global     | 0         | Population Density (over 1000 ppl/sqkm, proportion) |
| Animal contact | Female | Early Neonatal | 80 plus | Global     | 0         | Population Density (under 150 ppl/sqkm, proportion) |
| Animal contact | Female | Early Neonatal | 80 plus | Global     | 0         | Vehicles - 4 wheels (per capita)                    |
| Animal contact | Female | Early Neonatal | 80 plus | Global     | 1         | Alcohol (litres per capita)                         |
| Animal contact | Female | Early Neonatal | 80 plus | Global     | 1         | Log-transformed SEV scalar: Animal                  |
| Animal contact | Female | Early Neonatal | 80 plus | Global     | 1         | Population 15 to 30 (proportion)                    |
| Animal contact | Female | Early Neonatal | 80 plus | Global     | 1         | Vehicles - 2 wheels (per capita)                    |
| Animal contact | Female | Early Neonatal | 80 plus | Data Rich  | -1        | Education (years per capita)                        |
| Animal contact | Female | Early Neonatal | 80 plus | Data Rich  | -1        | Health System Access 2 (unitless)                   |
| Animal contact | Female | Early Neonatal | 80 plus | Data Rich  | -1        | Sociodemographic Status                             |
| Animal contact | Female | Early Neonatal | 80 plus | Data Rich  | 0         | Elevation Over 1500m (proportion)                   |
| Animal contact | Female | Early Neonatal | 80 plus | Data Rich  | 0         | Elevation Under 100m (proportion)                   |
| Animal contact | Female | Early Neonatal | 80 plus | Data Rich  | 0         | LDI (IS per capita)                                 |
| Animal contact | Female | Early Neonatal | 80 plus | Data Rich  | 0         | Population Density (over 1000 ppl/sqkm, proportion) |
| Animal contact | Female | Early Neonatal | 80 plus | Data Rich  | 0         | Population Density (under 150 ppl/sqkm, proportion) |

**Appendix Table 10: CODEm covariates used, level of covariate, and expected direction of covariate by cause, sex, and age**

| Cause                   | Sex    | Age start      | Age end | Model type | Direction | Covariate                                           |
|-------------------------|--------|----------------|---------|------------|-----------|-----------------------------------------------------|
| Animal contact          | Female | Early Neonatal | 80 plus | Data Rich  | 0         | Vehicles - 4 wheels (per capita)                    |
| Animal contact          | Female | Early Neonatal | 80 plus | Data Rich  | 1         | Alcohol (litres per capita)                         |
| Animal contact          | Female | Early Neonatal | 80 plus | Data Rich  | 1         | Log-transformed SEV scalar: Animal                  |
| Animal contact          | Female | Early Neonatal | 80 plus | Data Rich  | 1         | Population 15 to 30 (proportion)                    |
| Animal contact          | Female | Early Neonatal | 80 plus | Data Rich  | 1         | Vehicles - 2 wheels (per capita)                    |
| Venomous animal contact | Male   | Early Neonatal | 80 plus | Global     | -1        | Education (years per capita)                        |
| Venomous animal contact | Male   | Early Neonatal | 80 plus | Global     | -1        | Health System Access 2 (unitless)                   |
| Venomous animal contact | Male   | Early Neonatal | 80 plus | Global     | -1        | Sociodemographic Status                             |
| Venomous animal contact | Male   | Early Neonatal | 80 plus | Global     | 0         | Elevation Over 1500m (proportion)                   |
| Venomous animal contact | Male   | Early Neonatal | 80 plus | Global     | 0         | Elevation Under 100m (proportion)                   |
| Venomous animal contact | Male   | Early Neonatal | 80 plus | Global     | 0         | LDI (IS per capita)                                 |
| Venomous animal contact | Male   | Early Neonatal | 80 plus | Global     | 0         | Population Density (over 1000 ppl/sqkm, proportion) |
| Venomous animal contact | Male   | Early Neonatal | 80 plus | Global     | 0         | Population Density (under 150 ppl/sqkm, proportion) |
| Venomous animal contact | Male   | Early Neonatal | 80 plus | Global     | 0         | Vehicles - 4 wheels (per capita)                    |
| Venomous animal contact | Male   | Early Neonatal | 80 plus | Global     | 1         | Alcohol (litres per capita)                         |
| Venomous animal contact | Male   | Early Neonatal | 80 plus | Global     | 1         | Log-transformed SEV scalar: Venom                   |
| Venomous animal contact | Male   | Early Neonatal | 80 plus | Global     | 1         | Vehicles - 2 wheels (per capita)                    |
| Venomous animal contact | Male   | Early Neonatal | 80 plus | Data Rich  | -1        | Education (years per capita)                        |
| Venomous animal contact | Male   | Early Neonatal | 80 plus | Data Rich  | -1        | Health System Access 2 (unitless)                   |
| Venomous animal contact | Male   | Early Neonatal | 80 plus | Data Rich  | -1        | Sociodemographic Status                             |
| Venomous animal contact | Male   | Early Neonatal | 80 plus | Data Rich  | 0         | Elevation Over 1500m (proportion)                   |
| Venomous animal contact | Male   | Early Neonatal | 80 plus | Data Rich  | 0         | Elevation Under 100m (proportion)                   |
| Venomous animal contact | Male   | Early Neonatal | 80 plus | Data Rich  | 0         | LDI (IS per capita)                                 |
| Venomous animal contact | Male   | Early Neonatal | 80 plus | Data Rich  | 0         | Population Density (over 1000 ppl/sqkm, proportion) |
| Venomous animal contact | Male   | Early Neonatal | 80 plus | Data Rich  | 0         | Population Density (under 150 ppl/sqkm, proportion) |
| Venomous animal contact | Male   | Early Neonatal | 80 plus | Data Rich  | 0         | Vehicles - 4 wheels (per capita)                    |
| Venomous animal contact | Male   | Early Neonatal | 80 plus | Data Rich  | 1         | Alcohol (litres per capita)                         |
| Venomous animal contact | Male   | Early Neonatal | 80 plus | Data Rich  | 1         | Log-transformed SEV scalar: Venom                   |
| Venomous animal contact | Male   | Early Neonatal | 80 plus | Data Rich  | 1         | Vehicles - 2 wheels (per capita)                    |
| Venomous animal contact | Female | Early Neonatal | 80 plus | Global     | -1        | Education (years per capita)                        |
| Venomous animal contact | Female | Early Neonatal | 80 plus | Global     | -1        | Health System Access 2 (unitless)                   |
| Venomous animal contact | Female | Early Neonatal | 80 plus | Global     | -1        | Sociodemographic Status                             |
| Venomous animal contact | Female | Early Neonatal | 80 plus | Global     | 0         | Elevation Over 1500m (proportion)                   |
| Venomous animal contact | Female | Early Neonatal | 80 plus | Global     | 0         | Elevation Under 100m (proportion)                   |
| Venomous animal contact | Female | Early Neonatal | 80 plus | Global     | 0         | LDI (IS per capita)                                 |
| Venomous animal contact | Female | Early Neonatal | 80 plus | Global     | 0         | Population Density (over 1000 ppl/sqkm, proportion) |
| Venomous animal contact | Female | Early Neonatal | 80 plus | Global     | 0         | Population Density (under 150 ppl/sqkm, proportion) |
| Venomous animal contact | Female | Early Neonatal | 80 plus | Global     | 0         | Vehicles - 4 wheels (per capita)                    |
| Venomous animal contact | Female | Early Neonatal | 80 plus | Global     | 1         | Alcohol (litres per capita)                         |
| Venomous animal contact | Female | Early Neonatal | 80 plus | Global     | 1         | Log-transformed SEV scalar: Venom                   |
| Venomous animal contact | Female | Early Neonatal | 80 plus | Global     | 1         | Vehicles - 2 wheels (per capita)                    |
| Venomous animal contact | Female | Early Neonatal | 80 plus | Data Rich  | -1        | Education (years per capita)                        |
| Venomous animal contact | Female | Early Neonatal | 80 plus | Data Rich  | -1        | Health System Access 2 (unitless)                   |
| Venomous animal contact | Female | Early Neonatal | 80 plus | Data Rich  | -1        | Sociodemographic Status                             |

**Appendix Table 10: CODEm covariates used, level of covariate, and expected direction of covariate by cause, sex, and age**

| Cause                       | Sex    | Age start      | Age end | Model type | Direction | Covariate                                           |
|-----------------------------|--------|----------------|---------|------------|-----------|-----------------------------------------------------|
| Venomous animal contact     | Female | Early Neonatal | 80 plus | Data Rich  | 0         | Elevation Over 1500m (proportion)                   |
| Venomous animal contact     | Female | Early Neonatal | 80 plus | Data Rich  | 0         | Elevation Under 100m (proportion)                   |
| Venomous animal contact     | Female | Early Neonatal | 80 plus | Data Rich  | 0         | LDI (IS per capita)                                 |
| Venomous animal contact     | Female | Early Neonatal | 80 plus | Data Rich  | 0         | Population Density (over 1000 ppl/sqkm, proportion) |
| Venomous animal contact     | Female | Early Neonatal | 80 plus | Data Rich  | 0         | Population Density (under 150 ppl/sqkm, proportion) |
| Venomous animal contact     | Female | Early Neonatal | 80 plus | Data Rich  | 0         | Vehicles - 4 wheels (per capita)                    |
| Venomous animal contact     | Female | Early Neonatal | 80 plus | Data Rich  | 1         | Alcohol (litres per capita)                         |
| Venomous animal contact     | Female | Early Neonatal | 80 plus | Data Rich  | 1         | Log-transformed SEV scalar: Venom                   |
| Venomous animal contact     | Female | Early Neonatal | 80 plus | Data Rich  | 1         | Vehicles - 2 wheels (per capita)                    |
| Non-venomous animal contact | Male   | Early Neonatal | 80 plus | Global     | -1        | Education (years per capita)                        |
| Non-venomous animal contact | Male   | Early Neonatal | 80 plus | Global     | -1        | Health System Access 2 (unitless)                   |
| Non-venomous animal contact | Male   | Early Neonatal | 80 plus | Global     | -1        | Sociodemographic Status                             |
| Non-venomous animal contact | Male   | Early Neonatal | 80 plus | Global     | 0         | Elevation Over 1500m (proportion)                   |
| Non-venomous animal contact | Male   | Early Neonatal | 80 plus | Global     | 0         | Elevation Under 100m (proportion)                   |
| Non-venomous animal contact | Male   | Early Neonatal | 80 plus | Global     | 0         | LDI (IS per capita)                                 |
| Non-venomous animal contact | Male   | Early Neonatal | 80 plus | Global     | 0         | Population Density (over 1000 ppl/sqkm, proportion) |
| Non-venomous animal contact | Male   | Early Neonatal | 80 plus | Global     | 0         | Population Density (under 150 ppl/sqkm, proportion) |
| Non-venomous animal contact | Male   | Early Neonatal | 80 plus | Global     | 0         | Vehicles - 4 wheels (per capita)                    |
| Non-venomous animal contact | Male   | Early Neonatal | 80 plus | Global     | 1         | Alcohol (litres per capita)                         |
| Non-venomous animal contact | Male   | Early Neonatal | 80 plus | Global     | 1         | Log-transformed SEV scalar: Non Ven                 |
| Non-venomous animal contact | Male   | Early Neonatal | 80 plus | Global     | 1         | Vehicles - 2 wheels (per capita)                    |
| Non-venomous animal contact | Male   | Early Neonatal | 80 plus | Data Rich  | -1        | Education (years per capita)                        |
| Non-venomous animal contact | Male   | Early Neonatal | 80 plus | Data Rich  | -1        | Health System Access 2 (unitless)                   |
| Non-venomous animal contact | Male   | Early Neonatal | 80 plus | Data Rich  | -1        | Sociodemographic Status                             |
| Non-venomous animal contact | Male   | Early Neonatal | 80 plus | Data Rich  | 0         | Elevation Over 1500m (proportion)                   |
| Non-venomous animal contact | Male   | Early Neonatal | 80 plus | Data Rich  | 0         | Elevation Under 100m (proportion)                   |
| Non-venomous animal contact | Male   | Early Neonatal | 80 plus | Data Rich  | 0         | LDI (IS per capita)                                 |
| Non-venomous animal contact | Male   | Early Neonatal | 80 plus | Data Rich  | 0         | Population Density (over 1000 ppl/sqkm, proportion) |
| Non-venomous animal contact | Male   | Early Neonatal | 80 plus | Data Rich  | 0         | Population Density (under 150 ppl/sqkm, proportion) |
| Non-venomous animal contact | Male   | Early Neonatal | 80 plus | Data Rich  | 0         | Vehicles - 4 wheels (per capita)                    |
| Non-venomous animal contact | Male   | Early Neonatal | 80 plus | Data Rich  | 1         | Alcohol (litres per capita)                         |
| Non-venomous animal contact | Male   | Early Neonatal | 80 plus | Data Rich  | 1         | Log-transformed SEV scalar: Non Ven                 |
| Non-venomous animal contact | Male   | Early Neonatal | 80 plus | Data Rich  | 1         | Vehicles - 2 wheels (per capita)                    |
| Non-venomous animal contact | Female | Early Neonatal | 80 plus | Global     | -1        | Education (years per capita)                        |
| Non-venomous animal contact | Female | Early Neonatal | 80 plus | Global     | -1        | Health System Access 2 (unitless)                   |
| Non-venomous animal contact | Female | Early Neonatal | 80 plus | Global     | -1        | Sociodemographic Status                             |
| Non-venomous animal contact | Female | Early Neonatal | 80 plus | Global     | 0         | Elevation Over 1500m (proportion)                   |
| Non-venomous animal contact | Female | Early Neonatal | 80 plus | Global     | 0         | Elevation Under 100m (proportion)                   |
| Non-venomous animal contact | Female | Early Neonatal | 80 plus | Global     | 0         | LDI (IS per capita)                                 |
| Non-venomous animal contact | Female | Early Neonatal | 80 plus | Global     | 0         | Population Density (over 1000 ppl/sqkm, proportion) |
| Non-venomous animal contact | Female | Early Neonatal | 80 plus | Global     | 0         | Population Density (under 150 ppl/sqkm, proportion) |
| Non-venomous animal contact | Female | Early Neonatal | 80 plus | Global     | 0         | Vehicles - 4 wheels (per capita)                    |
| Non-venomous animal contact | Female | Early Neonatal | 80 plus | Global     | 1         | Alcohol (litres per capita)                         |
| Non-venomous animal contact | Female | Early Neonatal | 80 plus | Global     | 1         | Log-transformed SEV scalar: Non Ven                 |

**Appendix Table 10: CODEm covariates used, level of covariate, and expected direction of covariate by cause, sex, and age**

| Cause                                           | Sex    | Age start      | Age end | Model type | Direction | Covariate                                           |
|-------------------------------------------------|--------|----------------|---------|------------|-----------|-----------------------------------------------------|
| Non-venomous animal contact                     | Female | Early Neonatal | 80 plus | Global     | 1         | Vehicles - 2 wheels (per capita)                    |
| Non-venomous animal contact                     | Female | Early Neonatal | 80 plus | Data Rich  | -1        | Education (years per capita)                        |
| Non-venomous animal contact                     | Female | Early Neonatal | 80 plus | Data Rich  | -1        | Health System Access 2 (unitless)                   |
| Non-venomous animal contact                     | Female | Early Neonatal | 80 plus | Data Rich  | -1        | Sociodemographic Status                             |
| Non-venomous animal contact                     | Female | Early Neonatal | 80 plus | Data Rich  | 0         | Elevation Over 1500m (proportion)                   |
| Non-venomous animal contact                     | Female | Early Neonatal | 80 plus | Data Rich  | 0         | Elevation Under 100m (proportion)                   |
| Non-venomous animal contact                     | Female | Early Neonatal | 80 plus | Data Rich  | 0         | LDI (IS per capita)                                 |
| Non-venomous animal contact                     | Female | Early Neonatal | 80 plus | Data Rich  | 0         | Population Density (over 1000 ppl/sqkm, proportion) |
| Non-venomous animal contact                     | Female | Early Neonatal | 80 plus | Data Rich  | 0         | Population Density (under 150 ppl/sqkm, proportion) |
| Non-venomous animal contact                     | Female | Early Neonatal | 80 plus | Data Rich  | 0         | Vehicles - 4 wheels (per capita)                    |
| Non-venomous animal contact                     | Female | Early Neonatal | 80 plus | Data Rich  | 1         | Alcohol (litres per capita)                         |
| Non-venomous animal contact                     | Female | Early Neonatal | 80 plus | Data Rich  | 1         | Log-transformed SEV scalar: Non Ven                 |
| Non-venomous animal contact                     | Female | Early Neonatal | 80 plus | Data Rich  | 1         | Vehicles - 2 wheels (per capita)                    |
| Pulmonary aspiration and foreign body in airway | Male   | Early Neonatal | 80 plus | Global     | -1        | Health System Access 2 (unitless)                   |
| Pulmonary aspiration and foreign body in airway | Male   | Early Neonatal | 80 plus | Global     | 0         | LDI (IS per capita)                                 |
| Pulmonary aspiration and foreign body in airway | Male   | Early Neonatal | 80 plus | Global     | 0         | Sociodemographic Status                             |
| Pulmonary aspiration and foreign body in airway | Male   | Early Neonatal | 80 plus | Global     | 1         | Alcohol (litres per capita)                         |
| Pulmonary aspiration and foreign body in airway | Male   | Early Neonatal | 80 plus | Global     | 1         | Log-transformed SEV scalar: F Body Asp              |
| Pulmonary aspiration and foreign body in airway | Male   | Early Neonatal | 80 plus | Global     | 1         | Mean BMI                                            |
| Pulmonary aspiration and foreign body in airway | Male   | Early Neonatal | 80 plus | Data Rich  | -1        | Health System Access 2 (unitless)                   |
| Pulmonary aspiration and foreign body in airway | Male   | Early Neonatal | 80 plus | Data Rich  | 0         | LDI (IS per capita)                                 |
| Pulmonary aspiration and foreign body in airway | Male   | Early Neonatal | 80 plus | Data Rich  | 0         | Sociodemographic Status                             |
| Pulmonary aspiration and foreign body in airway | Male   | Early Neonatal | 80 plus | Data Rich  | 1         | Alcohol (litres per capita)                         |
| Pulmonary aspiration and foreign body in airway | Male   | Early Neonatal | 80 plus | Data Rich  | 1         | Log-transformed SEV scalar: F Body Asp              |
| Pulmonary aspiration and foreign body in airway | Male   | Early Neonatal | 80 plus | Data Rich  | 1         | Mean BMI                                            |
| Pulmonary aspiration and foreign body in airway | Female | Early Neonatal | 80 plus | Global     | -1        | Health System Access 2 (unitless)                   |
| Pulmonary aspiration and foreign body in airway | Female | Early Neonatal | 80 plus | Global     | 0         | LDI (IS per capita)                                 |
| Pulmonary aspiration and foreign body in airway | Female | Early Neonatal | 80 plus | Global     | 0         | Sociodemographic Status                             |
| Pulmonary aspiration and foreign body in airway | Female | Early Neonatal | 80 plus | Global     | 1         | Alcohol (litres per capita)                         |
| Pulmonary aspiration and foreign body in airway | Female | Early Neonatal | 80 plus | Global     | 1         | Log-transformed SEV scalar: F Body Asp              |
| Pulmonary aspiration and foreign body in airway | Female | Early Neonatal | 80 plus | Global     | 1         | Mean BMI                                            |
| Pulmonary aspiration and foreign body in airway | Female | Early Neonatal | 80 plus | Data Rich  | -1        | Health System Access 2 (unitless)                   |
| Pulmonary aspiration and foreign body in airway | Female | Early Neonatal | 80 plus | Data Rich  | 0         | LDI (IS per capita)                                 |
| Pulmonary aspiration and foreign body in airway | Female | Early Neonatal | 80 plus | Data Rich  | 0         | Sociodemographic Status                             |
| Pulmonary aspiration and foreign body in airway | Female | Early Neonatal | 80 plus | Data Rich  | 1         | Alcohol (litres per capita)                         |
| Pulmonary aspiration and foreign body in airway | Female | Early Neonatal | 80 plus | Data Rich  | 1         | Log-transformed SEV scalar: F Body Asp              |
| Pulmonary aspiration and foreign body in airway | Female | Early Neonatal | 80 plus | Data Rich  | 1         | Mean BMI                                            |
| Foreign body in other body part                 | Male   | Early Neonatal | 80 plus | Global     | -1        | Education (years per capita)                        |
| Foreign body in other body part                 | Male   | Early Neonatal | 80 plus | Global     | -1        | Health System Access 2 (unitless)                   |
| Foreign body in other body part                 | Male   | Early Neonatal | 80 plus | Global     | -1        | Sociodemographic Status                             |
| Foreign body in other body part                 | Male   | Early Neonatal | 80 plus | Global     | 0         | Elevation Over 1500m (proportion)                   |
| Foreign body in other body part                 | Male   | Early Neonatal | 80 plus | Global     | 0         | Elevation Under 100m (proportion)                   |
| Foreign body in other body part                 | Male   | Early Neonatal | 80 plus | Global     | 0         | LDI (IS per capita)                                 |
| Foreign body in other body part                 | Male   | Early Neonatal | 80 plus | Global     | 0         | Population Density (over 1000 ppl/sqkm, proportion) |

**Appendix Table 10: CODEm covariates used, level of covariate, and expected direction of covariate by cause, sex, and age**

| Cause                                | Sex    | Age start      | Age end | Model type | Direction | Covariate                                                      |
|--------------------------------------|--------|----------------|---------|------------|-----------|----------------------------------------------------------------|
| Foreign body in other body part      | Male   | Early Neonatal | 80 plus | Global     | 0         | Population Density (under 150 ppl/sqkm, proportion)            |
| Foreign body in other body part      | Male   | Early Neonatal | 80 plus | Global     | 1         | Alcohol (litres per capita)                                    |
| Foreign body in other body part      | Male   | Early Neonatal | 80 plus | Global     | 1         | Log-transformed SEV scalar: Oth F Body                         |
| Foreign body in other body part      | Male   | Early Neonatal | 80 plus | Data Rich  | -1        | Education (years per capita)                                   |
| Foreign body in other body part      | Male   | Early Neonatal | 80 plus | Data Rich  | -1        | Health System Access 2 (unitless)                              |
| Foreign body in other body part      | Male   | Early Neonatal | 80 plus | Data Rich  | -1        | Sociodemographic Status                                        |
| Foreign body in other body part      | Male   | Early Neonatal | 80 plus | Data Rich  | 0         | Elevation Over 1500m (proportion)                              |
| Foreign body in other body part      | Male   | Early Neonatal | 80 plus | Data Rich  | 0         | Elevation Under 100m (proportion)                              |
| Foreign body in other body part      | Male   | Early Neonatal | 80 plus | Data Rich  | 0         | LDI (IS per capita)                                            |
| Foreign body in other body part      | Male   | Early Neonatal | 80 plus | Data Rich  | 0         | Population Density (over 1000 ppl/sqkm, proportion)            |
| Foreign body in other body part      | Male   | Early Neonatal | 80 plus | Data Rich  | 0         | Population Density (under 150 ppl/sqkm, proportion)            |
| Foreign body in other body part      | Male   | Early Neonatal | 80 plus | Data Rich  | 1         | Alcohol (litres per capita)                                    |
| Foreign body in other body part      | Male   | Early Neonatal | 80 plus | Data Rich  | 1         | Log-transformed SEV scalar: Oth F Body                         |
| Foreign body in other body part      | Female | Early Neonatal | 80 plus | Global     | -1        | Education (years per capita)                                   |
| Foreign body in other body part      | Female | Early Neonatal | 80 plus | Global     | -1        | Health System Access 2 (unitless)                              |
| Foreign body in other body part      | Female | Early Neonatal | 80 plus | Global     | -1        | Sociodemographic Status                                        |
| Foreign body in other body part      | Female | Early Neonatal | 80 plus | Global     | 0         | Elevation Over 1500m (proportion)                              |
| Foreign body in other body part      | Female | Early Neonatal | 80 plus | Global     | 0         | Elevation Under 100m (proportion)                              |
| Foreign body in other body part      | Female | Early Neonatal | 80 plus | Global     | 0         | LDI (IS per capita)                                            |
| Foreign body in other body part      | Female | Early Neonatal | 80 plus | Global     | 0         | Population Density (over 1000 ppl/sqkm, proportion)            |
| Foreign body in other body part      | Female | Early Neonatal | 80 plus | Global     | 0         | Population Density (under 150 ppl/sqkm, proportion)            |
| Foreign body in other body part      | Female | Early Neonatal | 80 plus | Global     | 1         | Alcohol (litres per capita)                                    |
| Foreign body in other body part      | Female | Early Neonatal | 80 plus | Global     | 1         | Log-transformed SEV scalar: Oth F Body                         |
| Foreign body in other body part      | Female | Early Neonatal | 80 plus | Data Rich  | -1        | Education (years per capita)                                   |
| Foreign body in other body part      | Female | Early Neonatal | 80 plus | Data Rich  | -1        | Health System Access 2 (unitless)                              |
| Foreign body in other body part      | Female | Early Neonatal | 80 plus | Data Rich  | -1        | Sociodemographic Status                                        |
| Foreign body in other body part      | Female | Early Neonatal | 80 plus | Data Rich  | 0         | Elevation Over 1500m (proportion)                              |
| Foreign body in other body part      | Female | Early Neonatal | 80 plus | Data Rich  | 0         | Elevation Under 100m (proportion)                              |
| Foreign body in other body part      | Female | Early Neonatal | 80 plus | Data Rich  | 0         | LDI (IS per capita)                                            |
| Foreign body in other body part      | Female | Early Neonatal | 80 plus | Data Rich  | 0         | Population Density (over 1000 ppl/sqkm, proportion)            |
| Foreign body in other body part      | Female | Early Neonatal | 80 plus | Data Rich  | 0         | Population Density (under 150 ppl/sqkm, proportion)            |
| Foreign body in other body part      | Female | Early Neonatal | 80 plus | Data Rich  | 1         | Alcohol (litres per capita)                                    |
| Foreign body in other body part      | Female | Early Neonatal | 80 plus | Data Rich  | 1         | Log-transformed SEV scalar: Oth F Body                         |
| Environmental heat and cold exposure | Male   | Early Neonatal | 80 plus | Global     | -1        | Education (years per capita)                                   |
| Environmental heat and cold exposure | Male   | Early Neonatal | 80 plus | Global     | -1        | Health System Access 2 (unitless)                              |
| Environmental heat and cold exposure | Male   | Early Neonatal | 80 plus | Global     | -1        | Sociodemographic Status                                        |
| Environmental heat and cold exposure | Male   | Early Neonatal | 80 plus | Global     | 0         | 90th percentile climatic temperature in the given country-year |
| Environmental heat and cold exposure | Male   | Early Neonatal | 80 plus | Global     | 0         | Elevation 500 to 1500m (proportion)                            |
| Environmental heat and cold exposure | Male   | Early Neonatal | 80 plus | Global     | 0         | Elevation Over 1500m (proportion)                              |
| Environmental heat and cold exposure | Male   | Early Neonatal | 80 plus | Global     | 0         | LDI (IS per capita)                                            |
| Environmental heat and cold exposure | Male   | Early Neonatal | 80 plus | Global     | 0         | Population Density (150-300 ppl/sqkm, proportion)              |
| Environmental heat and cold exposure | Male   | Early Neonatal | 80 plus | Global     | 0         | Population-weighted mean temperature                           |
| Environmental heat and cold exposure | Male   | Early Neonatal | 80 plus | Global     | 0         | Rainfall (Quintiles 4-5)                                       |
| Environmental heat and cold exposure | Male   | Early Neonatal | 80 plus | Global     | 0         | Sanitation (proportion with access)                            |

**Appendix Table 10: CODEm covariates used, level of covariate, and expected direction of covariate by cause, sex, and age**

| Cause                                | Sex    | Age start      | Age end | Model type | Direction | Covariate                                                      |
|--------------------------------------|--------|----------------|---------|------------|-----------|----------------------------------------------------------------|
| Environmental heat and cold exposure | Male   | Early Neonatal | 80 plus | Data Rich  | -1        | Education (years per capita)                                   |
| Environmental heat and cold exposure | Male   | Early Neonatal | 80 plus | Data Rich  | -1        | Health System Access 2 (unitless)                              |
| Environmental heat and cold exposure | Male   | Early Neonatal | 80 plus | Data Rich  | -1        | Sociodemographic Status                                        |
| Environmental heat and cold exposure | Male   | Early Neonatal | 80 plus | Data Rich  | 0         | 90th percentile climatic temperature in the given country-year |
| Environmental heat and cold exposure | Male   | Early Neonatal | 80 plus | Data Rich  | 0         | Elevation 500 to 1500m (proportion)                            |
| Environmental heat and cold exposure | Male   | Early Neonatal | 80 plus | Data Rich  | 0         | Elevation Over 1500m (proportion)                              |
| Environmental heat and cold exposure | Male   | Early Neonatal | 80 plus | Data Rich  | 0         | LDI (IS per capita)                                            |
| Environmental heat and cold exposure | Male   | Early Neonatal | 80 plus | Data Rich  | 0         | Population Density (150-300 ppl/sqkm, proportion)              |
| Environmental heat and cold exposure | Male   | Early Neonatal | 80 plus | Data Rich  | 0         | Population-weighted mean temperature                           |
| Environmental heat and cold exposure | Male   | Early Neonatal | 80 plus | Data Rich  | 0         | Rainfall (Quintiles 4-5)                                       |
| Environmental heat and cold exposure | Male   | Early Neonatal | 80 plus | Data Rich  | 0         | Sanitation (proportion with access)                            |
| Environmental heat and cold exposure | Female | Early Neonatal | 80 plus | Global     | -1        | Education (years per capita)                                   |
| Environmental heat and cold exposure | Female | Early Neonatal | 80 plus | Global     | -1        | Health System Access 2 (unitless)                              |
| Environmental heat and cold exposure | Female | Early Neonatal | 80 plus | Global     | -1        | Sociodemographic Status                                        |
| Environmental heat and cold exposure | Female | Early Neonatal | 80 plus | Global     | 0         | 90th percentile climatic temperature in the given country-year |
| Environmental heat and cold exposure | Female | Early Neonatal | 80 plus | Global     | 0         | Elevation 500 to 1500m (proportion)                            |
| Environmental heat and cold exposure | Female | Early Neonatal | 80 plus | Global     | 0         | Elevation Over 1500m (proportion)                              |
| Environmental heat and cold exposure | Female | Early Neonatal | 80 plus | Global     | 0         | LDI (IS per capita)                                            |
| Environmental heat and cold exposure | Female | Early Neonatal | 80 plus | Global     | 0         | Population Density (150-300 ppl/sqkm, proportion)              |
| Environmental heat and cold exposure | Female | Early Neonatal | 80 plus | Global     | 0         | Population-weighted mean temperature                           |
| Environmental heat and cold exposure | Female | Early Neonatal | 80 plus | Global     | 0         | Rainfall (Quintiles 4-5)                                       |
| Environmental heat and cold exposure | Female | Early Neonatal | 80 plus | Global     | 0         | Sanitation (proportion with access)                            |
| Environmental heat and cold exposure | Female | Early Neonatal | 80 plus | Data Rich  | -1        | Education (years per capita)                                   |
| Environmental heat and cold exposure | Female | Early Neonatal | 80 plus | Data Rich  | -1        | Health System Access 2 (unitless)                              |
| Environmental heat and cold exposure | Female | Early Neonatal | 80 plus | Data Rich  | -1        | Sociodemographic Status                                        |
| Environmental heat and cold exposure | Female | Early Neonatal | 80 plus | Data Rich  | 0         | 90th percentile climatic temperature in the given country-year |
| Environmental heat and cold exposure | Female | Early Neonatal | 80 plus | Data Rich  | 0         | Elevation 500 to 1500m (proportion)                            |
| Environmental heat and cold exposure | Female | Early Neonatal | 80 plus | Data Rich  | 0         | Elevation Over 1500m (proportion)                              |
| Environmental heat and cold exposure | Female | Early Neonatal | 80 plus | Data Rich  | 0         | LDI (IS per capita)                                            |
| Environmental heat and cold exposure | Female | Early Neonatal | 80 plus | Data Rich  | 0         | Population Density (150-300 ppl/sqkm, proportion)              |
| Environmental heat and cold exposure | Female | Early Neonatal | 80 plus | Data Rich  | 0         | Population-weighted mean temperature                           |
| Environmental heat and cold exposure | Female | Early Neonatal | 80 plus | Data Rich  | 0         | Rainfall (Quintiles 4-5)                                       |
| Environmental heat and cold exposure | Female | Early Neonatal | 80 plus | Data Rich  | 0         | Sanitation (proportion with access)                            |
| Other unintentional injuries         | Male   | Early Neonatal | 80 plus | Global     | -1        | Education (years per capita)                                   |
| Other unintentional injuries         | Male   | Early Neonatal | 80 plus | Global     | -1        | Health System Access 2 (unitless)                              |
| Other unintentional injuries         | Male   | Early Neonatal | 80 plus | Global     | 0         | Elevation Over 1500m (proportion)                              |
| Other unintentional injuries         | Male   | Early Neonatal | 80 plus | Global     | 0         | Elevation Under 100m (proportion)                              |
| Other unintentional injuries         | Male   | Early Neonatal | 80 plus | Global     | 0         | LDI (IS per capita)                                            |
| Other unintentional injuries         | Male   | Early Neonatal | 80 plus | Global     | 0         | Population Density (over 1000 ppl/sqkm, proportion)            |
| Other unintentional injuries         | Male   | Early Neonatal | 80 plus | Global     | 0         | Population Density (under 150 ppl/sqkm, proportion)            |
| Other unintentional injuries         | Male   | Early Neonatal | 80 plus | Global     | 0         | Sociodemographic Status                                        |
| Other unintentional injuries         | Male   | Early Neonatal | 80 plus | Global     | 0         | Vehicles - 4 wheels (per capita)                               |
| Other unintentional injuries         | Male   | Early Neonatal | 80 plus | Global     | 1         | Alcohol (litres per capita)                                    |
| Other unintentional injuries         | Male   | Early Neonatal | 80 plus | Global     | 1         | Log-transformed SEV scalar: Oth Unint                          |

**Appendix Table 10: CODEm covariates used, level of covariate, and expected direction of covariate by cause, sex, and age**

| Cause                        | Sex    | Age start      | Age end | Model type | Direction | Covariate                                           |
|------------------------------|--------|----------------|---------|------------|-----------|-----------------------------------------------------|
| Other unintentional injuries | Male   | Early Neonatal | 80 plus | Global     | 1         | Vehicles - 2 wheels (per capita)                    |
| Other unintentional injuries | Male   | Early Neonatal | 80 plus | Data Rich  | -1        | Education (years per capita)                        |
| Other unintentional injuries | Male   | Early Neonatal | 80 plus | Data Rich  | -1        | Health System Access 2 (unitless)                   |
| Other unintentional injuries | Male   | Early Neonatal | 80 plus | Data Rich  | 0         | Elevation Over 1500m (proportion)                   |
| Other unintentional injuries | Male   | Early Neonatal | 80 plus | Data Rich  | 0         | Elevation Under 100m (proportion)                   |
| Other unintentional injuries | Male   | Early Neonatal | 80 plus | Data Rich  | 0         | LDI (IS per capita)                                 |
| Other unintentional injuries | Male   | Early Neonatal | 80 plus | Data Rich  | 0         | Population Density (over 1000 ppl/sqkm, proportion) |
| Other unintentional injuries | Male   | Early Neonatal | 80 plus | Data Rich  | 0         | Population Density (under 150 ppl/sqkm, proportion) |
| Other unintentional injuries | Male   | Early Neonatal | 80 plus | Data Rich  | 0         | Sociodemographic Status                             |
| Other unintentional injuries | Male   | Early Neonatal | 80 plus | Data Rich  | 0         | Vehicles - 4 wheels (per capita)                    |
| Other unintentional injuries | Male   | Early Neonatal | 80 plus | Data Rich  | 1         | Alcohol (litres per capita)                         |
| Other unintentional injuries | Male   | Early Neonatal | 80 plus | Data Rich  | 1         | Log-transformed SEV scalar: Oth Unint               |
| Other unintentional injuries | Male   | Early Neonatal | 80 plus | Data Rich  | 1         | Vehicles - 2 wheels (per capita)                    |
| Other unintentional injuries | Female | Early Neonatal | 80 plus | Global     | -1        | Education (years per capita)                        |
| Other unintentional injuries | Female | Early Neonatal | 80 plus | Global     | -1        | Health System Access 2 (unitless)                   |
| Other unintentional injuries | Female | Early Neonatal | 80 plus | Global     | 0         | Elevation Over 1500m (proportion)                   |
| Other unintentional injuries | Female | Early Neonatal | 80 plus | Global     | 0         | Elevation Under 100m (proportion)                   |
| Other unintentional injuries | Female | Early Neonatal | 80 plus | Global     | 0         | LDI (IS per capita)                                 |
| Other unintentional injuries | Female | Early Neonatal | 80 plus | Global     | 0         | Population Density (over 1000 ppl/sqkm, proportion) |
| Other unintentional injuries | Female | Early Neonatal | 80 plus | Global     | 0         | Population Density (under 150 ppl/sqkm, proportion) |
| Other unintentional injuries | Female | Early Neonatal | 80 plus | Global     | 0         | Sociodemographic Status                             |
| Other unintentional injuries | Female | Early Neonatal | 80 plus | Global     | 0         | Vehicles - 4 wheels (per capita)                    |
| Other unintentional injuries | Female | Early Neonatal | 80 plus | Global     | 1         | Alcohol (litres per capita)                         |
| Other unintentional injuries | Female | Early Neonatal | 80 plus | Global     | 1         | Log-transformed SEV scalar: Oth Unint               |
| Other unintentional injuries | Female | Early Neonatal | 80 plus | Global     | 1         | Vehicles - 2 wheels (per capita)                    |
| Other unintentional injuries | Female | Early Neonatal | 80 plus | Data Rich  | -1        | Education (years per capita)                        |
| Other unintentional injuries | Female | Early Neonatal | 80 plus | Data Rich  | -1        | Health System Access 2 (unitless)                   |
| Other unintentional injuries | Female | Early Neonatal | 80 plus | Data Rich  | 0         | Elevation Over 1500m (proportion)                   |
| Other unintentional injuries | Female | Early Neonatal | 80 plus | Data Rich  | 0         | Elevation Under 100m (proportion)                   |
| Other unintentional injuries | Female | Early Neonatal | 80 plus | Data Rich  | 0         | LDI (IS per capita)                                 |
| Other unintentional injuries | Female | Early Neonatal | 80 plus | Data Rich  | 0         | Population Density (over 1000 ppl/sqkm, proportion) |
| Other unintentional injuries | Female | Early Neonatal | 80 plus | Data Rich  | 0         | Population Density (under 150 ppl/sqkm, proportion) |
| Other unintentional injuries | Female | Early Neonatal | 80 plus | Data Rich  | 0         | Sociodemographic Status                             |
| Other unintentional injuries | Female | Early Neonatal | 80 plus | Data Rich  | 0         | Vehicles - 4 wheels (per capita)                    |
| Other unintentional injuries | Female | Early Neonatal | 80 plus | Data Rich  | 1         | Alcohol (litres per capita)                         |
| Other unintentional injuries | Female | Early Neonatal | 80 plus | Data Rich  | 1         | Log-transformed SEV scalar: Oth Unint               |
| Other unintentional injuries | Female | Early Neonatal | 80 plus | Data Rich  | 1         | Vehicles - 2 wheels (per capita)                    |
| Self-harm                    | Male   | 10 to 14       | 80 plus | Global     | -1        | Religion (binary, >50% Muslim)                      |
| Self-harm                    | Male   | 10 to 14       | 80 plus | Global     | 0         | Education (years per capita)                        |
| Self-harm                    | Male   | 10 to 14       | 80 plus | Global     | 0         | LDI (IS per capita)                                 |
| Self-harm                    | Male   | 10 to 14       | 80 plus | Global     | 0         | Population Density (150-300 ppl/sqkm, proportion)   |
| Self-harm                    | Male   | 10 to 14       | 80 plus | Global     | 0         | Population Density (300-500 ppl/sqkm, proportion)   |
| Self-harm                    | Male   | 10 to 14       | 80 plus | Global     | 0         | Population Density (500-1000 ppl/sqkm, proportion)  |
| Self-harm                    | Male   | 10 to 14       | 80 plus | Global     | 0         | Population Density (over 1000 ppl/sqkm, proportion) |

**Appendix Table 10: CODEm covariates used, level of covariate, and expected direction of covariate by cause, sex, and age**

| Cause     | Sex    | Age start | Age end | Model type | Direction | Covariate                                                       |
|-----------|--------|-----------|---------|------------|-----------|-----------------------------------------------------------------|
| Self-harm | Male   | 10 to 14  | 80 plus | Global     | 0         | Population Density (under 150 ppl/sqkm, proportion)             |
| Self-harm | Male   | 10 to 14  | 80 plus | Global     | 0         | Sociodemographic Status                                         |
| Self-harm | Male   | 10 to 14  | 80 plus | Global     | 1         | Alcohol (litres per capita)                                     |
| Self-harm | Male   | 10 to 14  | 80 plus | Global     | 1         | Log-transformed SEV scalar: Self Harm                           |
| Self-harm | Male   | 10 to 14  | 80 plus | Global     | 1         | Major disorder from dismod interpolated to be used as covariate |
| Self-harm | Male   | 10 to 14  | 80 plus | Global     | 1         | Opium Cultivation (binary)                                      |
| Self-harm | Male   | 10 to 14  | 80 plus | Data Rich  | -1        | Religion (binary, >50% Muslim)                                  |
| Self-harm | Male   | 10 to 14  | 80 plus | Data Rich  | 0         | Education (years per capita)                                    |
| Self-harm | Male   | 10 to 14  | 80 plus | Data Rich  | 0         | LDI (IS per capita)                                             |
| Self-harm | Male   | 10 to 14  | 80 plus | Data Rich  | 0         | Population Density (150-300 ppl/sqkm, proportion)               |
| Self-harm | Male   | 10 to 14  | 80 plus | Data Rich  | 0         | Population Density (300-500 ppl/sqkm, proportion)               |
| Self-harm | Male   | 10 to 14  | 80 plus | Data Rich  | 0         | Population Density (500-1000 ppl/sqkm, proportion)              |
| Self-harm | Male   | 10 to 14  | 80 plus | Data Rich  | 0         | Population Density (over 1000 ppl/sqkm, proportion)             |
| Self-harm | Male   | 10 to 14  | 80 plus | Data Rich  | 0         | Population Density (under 150 ppl/sqkm, proportion)             |
| Self-harm | Male   | 10 to 14  | 80 plus | Data Rich  | 0         | Sociodemographic Status                                         |
| Self-harm | Male   | 10 to 14  | 80 plus | Data Rich  | 1         | Alcohol (litres per capita)                                     |
| Self-harm | Male   | 10 to 14  | 80 plus | Data Rich  | 1         | Log-transformed SEV scalar: Self Harm                           |
| Self-harm | Male   | 10 to 14  | 80 plus | Data Rich  | 1         | Major disorder from dismod interpolated to be used as covariate |
| Self-harm | Male   | 10 to 14  | 80 plus | Data Rich  | 1         | Opium Cultivation (binary)                                      |
| Self-harm | Female | 10 to 14  | 80 plus | Global     | -1        | Religion (binary, >50% Muslim)                                  |
| Self-harm | Female | 10 to 14  | 80 plus | Global     | 0         | Education (years per capita)                                    |
| Self-harm | Female | 10 to 14  | 80 plus | Global     | 0         | LDI (IS per capita)                                             |
| Self-harm | Female | 10 to 14  | 80 plus | Global     | 0         | Population Density (150-300 ppl/sqkm, proportion)               |
| Self-harm | Female | 10 to 14  | 80 plus | Global     | 0         | Population Density (300-500 ppl/sqkm, proportion)               |
| Self-harm | Female | 10 to 14  | 80 plus | Global     | 0         | Population Density (500-1000 ppl/sqkm, proportion)              |
| Self-harm | Female | 10 to 14  | 80 plus | Global     | 0         | Population Density (over 1000 ppl/sqkm, proportion)             |
| Self-harm | Female | 10 to 14  | 80 plus | Global     | 0         | Population Density (under 150 ppl/sqkm, proportion)             |
| Self-harm | Female | 10 to 14  | 80 plus | Global     | 0         | Sociodemographic Status                                         |
| Self-harm | Female | 10 to 14  | 80 plus | Global     | 1         | Alcohol (litres per capita)                                     |
| Self-harm | Female | 10 to 14  | 80 plus | Global     | 1         | Log-transformed SEV scalar: Self Harm                           |
| Self-harm | Female | 10 to 14  | 80 plus | Global     | 1         | Major disorder from dismod interpolated to be used as covariate |
| Self-harm | Female | 10 to 14  | 80 plus | Global     | 1         | Opium Cultivation (binary)                                      |
| Self-harm | Female | 10 to 14  | 80 plus | Data Rich  | -1        | Religion (binary, >50% Muslim)                                  |
| Self-harm | Female | 10 to 14  | 80 plus | Data Rich  | 0         | Education (years per capita)                                    |
| Self-harm | Female | 10 to 14  | 80 plus | Data Rich  | 0         | LDI (IS per capita)                                             |
| Self-harm | Female | 10 to 14  | 80 plus | Data Rich  | 0         | Population Density (150-300 ppl/sqkm, proportion)               |
| Self-harm | Female | 10 to 14  | 80 plus | Data Rich  | 0         | Population Density (300-500 ppl/sqkm, proportion)               |
| Self-harm | Female | 10 to 14  | 80 plus | Data Rich  | 0         | Population Density (500-1000 ppl/sqkm, proportion)              |
| Self-harm | Female | 10 to 14  | 80 plus | Data Rich  | 0         | Population Density (over 1000 ppl/sqkm, proportion)             |
| Self-harm | Female | 10 to 14  | 80 plus | Data Rich  | 0         | Population Density (under 150 ppl/sqkm, proportion)             |
| Self-harm | Female | 10 to 14  | 80 plus | Data Rich  | 0         | Sociodemographic Status                                         |
| Self-harm | Female | 10 to 14  | 80 plus | Data Rich  | 1         | Alcohol (litres per capita)                                     |
| Self-harm | Female | 10 to 14  | 80 plus | Data Rich  | 1         | Log-transformed SEV scalar: Self Harm                           |
| Self-harm | Female | 10 to 14  | 80 plus | Data Rich  | 1         | Major disorder from dismod interpolated to be used as covariate |



**Appendix Table 10: CODEm covariates used, level of covariate, and expected direction of covariate by cause, sex, and age**

| Cause                  | Sex    | Age start      | Age end | Model type | Direction | Covariate                                           |
|------------------------|--------|----------------|---------|------------|-----------|-----------------------------------------------------|
| Self-harm              | Female | 10 to 14       | 80 plus | Data Rich  | 1         | Opium Cultivation (binary)                          |
| Interpersonal violence | Male   | Early Neonatal | 80 plus | Global     | -1        | Health System Access 2 (unitless)                   |
| Interpersonal violence | Male   | Early Neonatal | 80 plus | Global     | 0         | Education (years per capita)                        |
| Interpersonal violence | Male   | Early Neonatal | 80 plus | Global     | 0         | LDI (IS per capita)                                 |
| Interpersonal violence | Male   | Early Neonatal | 80 plus | Global     | 0         | Sociodemographic Status                             |
| Interpersonal violence | Male   | Early Neonatal | 80 plus | Global     | 1         | Alcohol (litres per capita)                         |
| Interpersonal violence | Male   | Early Neonatal | 80 plus | Global     | 1         | Log-transformed SEV scalar: Violence                |
| Interpersonal violence | Male   | Early Neonatal | 80 plus | Global     | 1         | Opium Cultivation (binary)                          |
| Interpersonal violence | Male   | Early Neonatal | 80 plus | Global     | 1         | Population Density (over 1000 ppl/sqkm, proportion) |
| Interpersonal violence | Male   | Early Neonatal | 80 plus | Data Rich  | -1        | Health System Access 2 (unitless)                   |
| Interpersonal violence | Male   | Early Neonatal | 80 plus | Data Rich  | 0         | Education (years per capita)                        |
| Interpersonal violence | Male   | Early Neonatal | 80 plus | Data Rich  | 0         | LDI (IS per capita)                                 |
| Interpersonal violence | Male   | Early Neonatal | 80 plus | Data Rich  | 0         | Sociodemographic Status                             |
| Interpersonal violence | Male   | Early Neonatal | 80 plus | Data Rich  | 1         | Alcohol (litres per capita)                         |
| Interpersonal violence | Male   | Early Neonatal | 80 plus | Data Rich  | 1         | Log-transformed SEV scalar: Violence                |
| Interpersonal violence | Male   | Early Neonatal | 80 plus | Data Rich  | 1         | Opium Cultivation (binary)                          |
| Interpersonal violence | Male   | Early Neonatal | 80 plus | Data Rich  | 1         | Population Density (over 1000 ppl/sqkm, proportion) |
| Interpersonal violence | Female | Early Neonatal | 80 plus | Global     | -1        | Health System Access 2 (unitless)                   |
| Interpersonal violence | Female | Early Neonatal | 80 plus | Global     | 0         | Education (years per capita)                        |
| Interpersonal violence | Female | Early Neonatal | 80 plus | Global     | 0         | LDI (IS per capita)                                 |
| Interpersonal violence | Female | Early Neonatal | 80 plus | Global     | 0         | Sociodemographic Status                             |
| Interpersonal violence | Female | Early Neonatal | 80 plus | Global     | 1         | Alcohol (litres per capita)                         |
| Interpersonal violence | Female | Early Neonatal | 80 plus | Global     | 1         | Log-transformed SEV scalar: Violence                |
| Interpersonal violence | Female | Early Neonatal | 80 plus | Global     | 1         | Opium Cultivation (binary)                          |
| Interpersonal violence | Female | Early Neonatal | 80 plus | Global     | 1         | Population Density (over 1000 ppl/sqkm, proportion) |
| Interpersonal violence | Female | Early Neonatal | 80 plus | Data Rich  | -1        | Health System Access 2 (unitless)                   |
| Interpersonal violence | Female | Early Neonatal | 80 plus | Data Rich  | 0         | Education (years per capita)                        |
| Interpersonal violence | Female | Early Neonatal | 80 plus | Data Rich  | 0         | LDI (IS per capita)                                 |
| Interpersonal violence | Female | Early Neonatal | 80 plus | Data Rich  | 0         | Sociodemographic Status                             |
| Interpersonal violence | Female | Early Neonatal | 80 plus | Data Rich  | 1         | Alcohol (litres per capita)                         |
| Interpersonal violence | Female | Early Neonatal | 80 plus | Data Rich  | 1         | Log-transformed SEV scalar: Violence                |
| Interpersonal violence | Female | Early Neonatal | 80 plus | Data Rich  | 1         | Opium Cultivation (binary)                          |
| Interpersonal violence | Female | Early Neonatal | 80 plus | Data Rich  | 1         | Population Density (over 1000 ppl/sqkm, proportion) |
| Assault by firearm     | Male   | Early Neonatal | 80 plus | Global     | -1        | Health System Access 2 (unitless)                   |
| Assault by firearm     | Male   | Early Neonatal | 80 plus | Global     | 0         | Education (years per capita)                        |
| Assault by firearm     | Male   | Early Neonatal | 80 plus | Global     | 0         | LDI (IS per capita)                                 |
| Assault by firearm     | Male   | Early Neonatal | 80 plus | Global     | 0         | Sociodemographic Status                             |
| Assault by firearm     | Male   | Early Neonatal | 80 plus | Global     | 1         | Alcohol (litres per capita)                         |
| Assault by firearm     | Male   | Early Neonatal | 80 plus | Global     | 1         | Log-transformed SEV scalar: Viol Gun                |
| Assault by firearm     | Male   | Early Neonatal | 80 plus | Global     | 1         | Opium Cultivation (binary)                          |
| Assault by firearm     | Male   | Early Neonatal | 80 plus | Global     | 1         | Population Density (over 1000 ppl/sqkm, proportion) |
| Assault by firearm     | Male   | Early Neonatal | 80 plus | Data Rich  | -1        | Health System Access 2 (unitless)                   |
| Assault by firearm     | Male   | Early Neonatal | 80 plus | Data Rich  | 0         | Education (years per capita)                        |
| Assault by firearm     | Male   | Early Neonatal | 80 plus | Data Rich  | 0         | LDI (IS per capita)                                 |

**Appendix Table 10: CODEm covariates used, level of covariate, and expected direction of covariate by cause, sex, and age**

| Cause                   | Sex    | Age start      | Age end | Model type | Direction | Covariate                                           |
|-------------------------|--------|----------------|---------|------------|-----------|-----------------------------------------------------|
| Assault by firearm      | Male   | Early Neonatal | 80 plus | Data Rich  | 0         | Sociodemographic Status                             |
| Assault by firearm      | Male   | Early Neonatal | 80 plus | Data Rich  | 1         | Alcohol (litres per capita)                         |
| Assault by firearm      | Male   | Early Neonatal | 80 plus | Data Rich  | 1         | Log-transformed SEV scalar: Viol Gun                |
| Assault by firearm      | Male   | Early Neonatal | 80 plus | Data Rich  | 1         | Opium Cultivation (binary)                          |
| Assault by firearm      | Male   | Early Neonatal | 80 plus | Data Rich  | 1         | Population Density (over 1000 ppl/sqkm, proportion) |
| Assault by firearm      | Female | Early Neonatal | 80 plus | Global     | -1        | Health System Access 2 (unitless)                   |
| Assault by firearm      | Female | Early Neonatal | 80 plus | Global     | 0         | Education (years per capita)                        |
| Assault by firearm      | Female | Early Neonatal | 80 plus | Global     | 0         | LDI (IS per capita)                                 |
| Assault by firearm      | Female | Early Neonatal | 80 plus | Global     | 0         | Sociodemographic Status                             |
| Assault by firearm      | Female | Early Neonatal | 80 plus | Global     | 1         | Alcohol (litres per capita)                         |
| Assault by firearm      | Female | Early Neonatal | 80 plus | Global     | 1         | Log-transformed SEV scalar: Viol Gun                |
| Assault by firearm      | Female | Early Neonatal | 80 plus | Global     | 1         | Opium Cultivation (binary)                          |
| Assault by firearm      | Female | Early Neonatal | 80 plus | Global     | 1         | Population Density (over 1000 ppl/sqkm, proportion) |
| Assault by firearm      | Female | Early Neonatal | 80 plus | Data Rich  | -1        | Health System Access 2 (unitless)                   |
| Assault by firearm      | Female | Early Neonatal | 80 plus | Data Rich  | 0         | Education (years per capita)                        |
| Assault by firearm      | Female | Early Neonatal | 80 plus | Data Rich  | 0         | LDI (IS per capita)                                 |
| Assault by firearm      | Female | Early Neonatal | 80 plus | Data Rich  | 0         | Sociodemographic Status                             |
| Assault by firearm      | Female | Early Neonatal | 80 plus | Data Rich  | 1         | Alcohol (litres per capita)                         |
| Assault by firearm      | Female | Early Neonatal | 80 plus | Data Rich  | 1         | Log-transformed SEV scalar: Viol Gun                |
| Assault by firearm      | Female | Early Neonatal | 80 plus | Data Rich  | 1         | Opium Cultivation (binary)                          |
| Assault by firearm      | Female | Early Neonatal | 80 plus | Data Rich  | 1         | Population Density (over 1000 ppl/sqkm, proportion) |
| Assault by sharp object | Male   | Early Neonatal | 80 plus | Global     | -1        | Health System Access 2 (unitless)                   |
| Assault by sharp object | Male   | Early Neonatal | 80 plus | Global     | 0         | Education (years per capita)                        |
| Assault by sharp object | Male   | Early Neonatal | 80 plus | Global     | 0         | LDI (IS per capita)                                 |
| Assault by sharp object | Male   | Early Neonatal | 80 plus | Global     | 0         | Sociodemographic Status                             |
| Assault by sharp object | Male   | Early Neonatal | 80 plus | Global     | 1         | Alcohol (litres per capita)                         |
| Assault by sharp object | Male   | Early Neonatal | 80 plus | Global     | 1         | Log-transformed SEV scalar: Viol Knife              |
| Assault by sharp object | Male   | Early Neonatal | 80 plus | Global     | 1         | Opium Cultivation (binary)                          |
| Assault by sharp object | Male   | Early Neonatal | 80 plus | Global     | 1         | Population Density (over 1000 ppl/sqkm, proportion) |
| Assault by sharp object | Male   | Early Neonatal | 80 plus | Data Rich  | -1        | Health System Access 2 (unitless)                   |
| Assault by sharp object | Male   | Early Neonatal | 80 plus | Data Rich  | 0         | Education (years per capita)                        |
| Assault by sharp object | Male   | Early Neonatal | 80 plus | Data Rich  | 0         | LDI (IS per capita)                                 |
| Assault by sharp object | Male   | Early Neonatal | 80 plus | Data Rich  | 0         | Sociodemographic Status                             |
| Assault by sharp object | Male   | Early Neonatal | 80 plus | Data Rich  | 1         | Alcohol (litres per capita)                         |
| Assault by sharp object | Male   | Early Neonatal | 80 plus | Data Rich  | 1         | Log-transformed SEV scalar: Viol Knife              |
| Assault by sharp object | Male   | Early Neonatal | 80 plus | Data Rich  | 1         | Opium Cultivation (binary)                          |
| Assault by sharp object | Male   | Early Neonatal | 80 plus | Data Rich  | 1         | Population Density (over 1000 ppl/sqkm, proportion) |
| Assault by sharp object | Female | Early Neonatal | 80 plus | Global     | -1        | Health System Access 2 (unitless)                   |
| Assault by sharp object | Female | Early Neonatal | 80 plus | Global     | 0         | Education (years per capita)                        |
| Assault by sharp object | Female | Early Neonatal | 80 plus | Global     | 0         | LDI (IS per capita)                                 |
| Assault by sharp object | Female | Early Neonatal | 80 plus | Global     | 0         | Sociodemographic Status                             |
| Assault by sharp object | Female | Early Neonatal | 80 plus | Global     | 1         | Alcohol (litres per capita)                         |
| Assault by sharp object | Female | Early Neonatal | 80 plus | Global     | 1         | Log-transformed SEV scalar: Viol Knife              |
| Assault by sharp object | Female | Early Neonatal | 80 plus | Global     | 1         | Opium Cultivation (binary)                          |

**Appendix Table 10: CODEm covariates used, level of covariate, and expected direction of covariate by cause, sex, and age**

| Cause                   | Sex    | Age start      | Age end | Model type | Direction | Covariate                                           |
|-------------------------|--------|----------------|---------|------------|-----------|-----------------------------------------------------|
| Assault by sharp object | Female | Early Neonatal | 80 plus | Global     | 1         | Population Density (over 1000 ppl/sqkm, proportion) |
| Assault by sharp object | Female | Early Neonatal | 80 plus | Data Rich  | -1        | Health System Access 2 (unitless)                   |
| Assault by sharp object | Female | Early Neonatal | 80 plus | Data Rich  | 0         | Education (years per capita)                        |
| Assault by sharp object | Female | Early Neonatal | 80 plus | Data Rich  | 0         | LDI (IS per capita)                                 |
| Assault by sharp object | Female | Early Neonatal | 80 plus | Data Rich  | 0         | Sociodemographic Status                             |
| Assault by sharp object | Female | Early Neonatal | 80 plus | Data Rich  | 1         | Alcohol (litres per capita)                         |
| Assault by sharp object | Female | Early Neonatal | 80 plus | Data Rich  | 1         | Log-transformed SEV scalar: Viol Knife              |
| Assault by sharp object | Female | Early Neonatal | 80 plus | Data Rich  | 1         | Opium Cultivation (binary)                          |
| Assault by sharp object | Female | Early Neonatal | 80 plus | Data Rich  | 1         | Population Density (over 1000 ppl/sqkm, proportion) |
| Assault by other means  | Male   | Early Neonatal | 80 plus | Global     | -1        | Health System Access 2 (unitless)                   |
| Assault by other means  | Male   | Early Neonatal | 80 plus | Global     | 0         | Education (years per capita)                        |
| Assault by other means  | Male   | Early Neonatal | 80 plus | Global     | 0         | LDI (IS per capita)                                 |
| Assault by other means  | Male   | Early Neonatal | 80 plus | Global     | 0         | Sociodemographic Status                             |
| Assault by other means  | Male   | Early Neonatal | 80 plus | Global     | 1         | Alcohol (litres per capita)                         |
| Assault by other means  | Male   | Early Neonatal | 80 plus | Global     | 1         | Log-transformed SEV scalar: Oth Viol                |
| Assault by other means  | Male   | Early Neonatal | 80 plus | Global     | 1         | Opium Cultivation (binary)                          |
| Assault by other means  | Male   | Early Neonatal | 80 plus | Global     | 1         | Population Density (over 1000 ppl/sqkm, proportion) |
| Assault by other means  | Male   | Early Neonatal | 80 plus | Data Rich  | -1        | Health System Access 2 (unitless)                   |
| Assault by other means  | Male   | Early Neonatal | 80 plus | Data Rich  | 0         | Education (years per capita)                        |
| Assault by other means  | Male   | Early Neonatal | 80 plus | Data Rich  | 0         | LDI (IS per capita)                                 |
| Assault by other means  | Male   | Early Neonatal | 80 plus | Data Rich  | 0         | Sociodemographic Status                             |
| Assault by other means  | Male   | Early Neonatal | 80 plus | Data Rich  | 1         | Alcohol (litres per capita)                         |
| Assault by other means  | Male   | Early Neonatal | 80 plus | Data Rich  | 1         | Log-transformed SEV scalar: Oth Viol                |
| Assault by other means  | Male   | Early Neonatal | 80 plus | Data Rich  | 1         | Opium Cultivation (binary)                          |
| Assault by other means  | Male   | Early Neonatal | 80 plus | Data Rich  | 1         | Population Density (over 1000 ppl/sqkm, proportion) |
| Assault by other means  | Female | Early Neonatal | 80 plus | Global     | -1        | Health System Access 2 (unitless)                   |
| Assault by other means  | Female | Early Neonatal | 80 plus | Global     | 0         | Education (years per capita)                        |
| Assault by other means  | Female | Early Neonatal | 80 plus | Global     | 0         | LDI (IS per capita)                                 |
| Assault by other means  | Female | Early Neonatal | 80 plus | Global     | 0         | Sociodemographic Status                             |
| Assault by other means  | Female | Early Neonatal | 80 plus | Global     | 1         | Alcohol (litres per capita)                         |
| Assault by other means  | Female | Early Neonatal | 80 plus | Global     | 1         | Log-transformed SEV scalar: Oth Viol                |
| Assault by other means  | Female | Early Neonatal | 80 plus | Global     | 1         | Opium Cultivation (binary)                          |
| Assault by other means  | Female | Early Neonatal | 80 plus | Global     | 1         | Population Density (over 1000 ppl/sqkm, proportion) |
| Assault by other means  | Female | Early Neonatal | 80 plus | Data Rich  | -1        | Health System Access 2 (unitless)                   |
| Assault by other means  | Female | Early Neonatal | 80 plus | Data Rich  | 0         | Education (years per capita)                        |
| Assault by other means  | Female | Early Neonatal | 80 plus | Data Rich  | 0         | LDI (IS per capita)                                 |
| Assault by other means  | Female | Early Neonatal | 80 plus | Data Rich  | 0         | Sociodemographic Status                             |
| Assault by other means  | Female | Early Neonatal | 80 plus | Data Rich  | 1         | Alcohol (litres per capita)                         |
| Assault by other means  | Female | Early Neonatal | 80 plus | Data Rich  | 1         | Log-transformed SEV scalar: Oth Viol                |
| Assault by other means  | Female | Early Neonatal | 80 plus | Data Rich  | 1         | Opium Cultivation (binary)                          |
| Assault by other means  | Female | Early Neonatal | 80 plus | Data Rich  | 1         | Population Density (over 1000 ppl/sqkm, proportion) |

**Appendix Table 11: CODEm predictive validity results by cause, sex, age, and location**

| Cause                                                           | Sex    | Age start   | Age end   | Predictive validity |          |          |           |             |              |
|-----------------------------------------------------------------|--------|-------------|-----------|---------------------|----------|----------|-----------|-------------|--------------|
|                                                                 |        |             |           | RMSE in             | RMSE out | Trend in | Trend out | Coverage in | Coverage out |
| Dengue [Global]                                                 | Female | 28-364 days | 80+ years | 0.452281            | 0.761531 | 0.297494 | 0.313454  | 0.993533    | 0.974533     |
| Dengue [Global]                                                 | Male   | 28-364 days | 80+ years | 0.495625            | 0.774469 | 0.297248 | 0.313193  | 0.993714    | 0.966925     |
| Otitis media [Data Rich]                                        | Male   | 0-6 days    | 80+ years | 0.425322            | 0.647622 | 0.335928 | 0.396117  | 0.989064    | 0.984749     |
| Otitis media [Data Rich]                                        | Female | 0-6 days    | 80+ years | 0.363955            | 0.586986 | 0.286561 | 0.334672  | 0.997475    | 0.993569     |
| Otitis media [Global]                                           | Male   | 0-6 days    | 80+ years | 0.500444            | 0.899948 | 0.37738  | 0.388461  | 0.995628    | 0.972198     |
| Otitis media [Global]                                           | Female | 0-6 days    | 80+ years | 0.439121            | 0.865089 | 0.329661 | 0.338007  | 0.996799    | 0.983102     |
| Iron-deficiency anemia [Global]                                 | Male   | 28-364 days | 80+ years | 0.382265            | 0.636393 | 0.215093 | 0.202262  | 0.996194    | 0.991176     |
| Iron-deficiency anemia [Global]                                 | Female | 28-364 days | 80+ years | 0.352926            | 0.647189 | 0.216384 | 0.198062  | 0.996112    | 0.987725     |
| Iron-deficiency anemia [Data Rich]                              | Male   | 28-364 days | 80+ years | 0.3828              | 0.537444 | 0.189702 | 0.167057  | 0.997806    | 0.99668      |
| Iron-deficiency anemia [Data Rich]                              | Female | 28-364 days | 80+ years | 0.362012            | 0.51194  | 0.185488 | 0.153208  | 0.998197    | 0.99761      |
| Hemoglobinopathies and hemolytic anemias [Global]               | Male   | 0-6 days    | 80+ years | 0.295039            | 0.54107  | 0.203266 | 0.238676  | 0.999529    | 0.992076     |
| Hemoglobinopathies and hemolytic anemias [Global]               | Female | 0-6 days    | 80+ years | 0.269417            | 0.532989 | 0.193873 | 0.233429  | 0.999429    | 0.991611     |
| Lymphoid leukemia [Global]                                      | Female | 28-364 days | 80+ years | 0.281087            | 0.40354  | 0.232408 | 0.232963  | 0.998657    | 0.991705     |
| Lymphoid leukemia [Data Rich]                                   | Female | 28-364 days | 80+ years | 0.242542            | 0.301024 | 0.210857 | 0.202506  | 0.998442    | 0.996523     |
| Other neonatal disorders [Global]                               | Female | 0-6 days    | 1-4 years | 0.475694            | 0.654773 | 0.430413 | 0.392056  | 0.998997    | 0.997866     |
| Other neonatal disorders [Global]                               | Male   | 0-6 days    | 1-4 years | 0.479061            | 0.699084 | 0.433597 | 0.415694  | 0.998773    | 0.997215     |
| Unintentional injuries [Global]                                 | Female | 28-364 days | 80+ years | 0.30561             | 0.460008 | 0.241532 | 0.25266   | 0.99481     | 0.978433     |
| Unintentional injuries [Global]                                 | Male   | 28-364 days | 80+ years | 0.279336            | 0.405252 | 0.227477 | 0.228916  | 0.994132    | 0.973144     |
| Bladder cancer [Data Rich]                                      | Male   | 15-19 years | 80+ years | 0.230582            | 0.274245 | 0.192908 | 0.213744  | 0.997134    | 0.995606     |
| Bladder cancer [Data Rich]                                      | Female | 15-19 years | 80+ years | 0.25352             | 0.304321 | 0.214221 | 0.241128  | 0.992256    | 0.99         |
| Acute lymphoid leukemia [Global]                                | Male   | 28-364 days | 80+ years | 0.292059            | 0.422015 | 0.234129 | 0.233471  | 0.998427    | 0.994249     |
| Acute lymphoid leukemia [Global]                                | Female | 28-364 days | 80+ years | 0.28521             | 0.434977 | 0.230676 | 0.234298  | 0.999145    | 0.994973     |
| Acute myeloid leukemia [Global]                                 | Male   | 28-364 days | 80+ years | 0.301073            | 0.4242   | 0.209321 | 0.206793  | 0.998524    | 0.99007      |
| Acute myeloid leukemia [Data Rich]                              | Female | 28-364 days | 80+ years | 0.219708            | 0.297696 | 0.182087 | 0.172123  | 0.999088    | 0.997735     |
| Acute myeloid leukemia [Global]                                 | Female | 28-364 days | 80+ years | 0.266001            | 0.436025 | 0.213681 | 0.212177  | 0.998629    | 0.989176     |
| Chronic myeloid leukemia [Data Rich]                            | Male   | 28-364 days | 80+ years | 0.22562             | 0.318327 | 0.181669 | 0.177122  | 0.9997      | 0.999022     |
| Chronic myeloid leukemia [Global]                               | Male   | 28-364 days | 80+ years | 0.290725            | 0.470004 | 0.232    | 0.239949  | 0.999373    | 0.993826     |
| Chronic myeloid leukemia [Data Rich]                            | Female | 28-364 days | 80+ years | 0.239071            | 0.339418 | 0.189041 | 0.171448  | 0.999641    | 0.998772     |
| Chronic myeloid leukemia [Global]                               | Female | 28-364 days | 80+ years | 0.310585            | 0.5115   | 0.242015 | 0.2381    | 0.999176    | 0.992972     |
| Urinary diseases and male infertility [Global]                  | Male   | 0-6 days    | 80+ years | 0.290118            | 0.518003 | 0.179799 | 0.187004  | 0.999147    | 0.988445     |
| Urinary diseases and male infertility [Global]                  | Female | 0-6 days    | 80+ years | 0.254053            | 0.532144 | 0.166862 | 0.179556  | 0.999222    | 0.984855     |
| Urinary diseases and male infertility [Data Rich]               | Female | 0-6 days    | 80+ years | 0.201183            | 0.262259 | 0.144319 | 0.168446  | 0.999212    | 0.99861      |
| Malignant skin melanoma [Data Rich]                             | Male   | 15-19 years | 80+ years | 0.262729            | 0.302005 | 0.201705 | 0.226216  | 0.998992    | 0.99836      |
| Malignant skin melanoma [Data Rich]                             | Female | 15-19 years | 80+ years | 0.232067            | 0.270683 | 0.191654 | 0.213212  | 0.998429    | 0.99734      |
| Other chronic respiratory diseases [Global]                     | Female | 0-6 days    | 80+ years | 0.497277            | 0.756624 | 0.270321 | 0.271602  | 0.966188    | 0.958657     |
| Interstitial lung disease and pulmonary sarcoidosis [Global]    | Female | 1-4 years   | 80+ years | 0.265464            | 0.500448 | 0.177692 | 0.182211  | 0.999523    | 0.98887      |
| Other neurological disorders [Data Rich]                        | Male   | 28-364 days | 80+ years | 0.196833            | 0.291023 | 0.155117 | 0.163341  | 0.999872    | 0.999686     |
| Other neurological disorders [Data Rich]                        | Female | 28-364 days | 80+ years | 0.203245            | 0.305705 | 0.160134 | 0.180026  | 0.999771    | 0.999414     |
| Parkinson disease [Global]                                      | Male   | 20-24 years | 80+ years | 0.263589            | 0.570326 | 0.161554 | 0.168037  | 0.999423    | 0.983429     |
| Parkinson disease [Global]                                      | Female | 20-24 years | 80+ years | 0.283927            | 0.557216 | 0.174262 | 0.177905  | 0.998717    | 0.97701      |
| Multiple sclerosis [Data Rich]                                  | Male   | 20-24 years | 80+ years | 0.228368            | 0.286237 | 0.17729  | 0.195852  | 0.9998      | 0.999435     |
| Multiple sclerosis [Data Rich]                                  | Female | 20-24 years | 80+ years | 0.233113            | 0.288984 | 0.182819 | 0.19636   | 0.999693    | 0.99918      |
| Asbestosis [Global]                                             | Male   | 0-6 days    | 80+ years | 0.690404            | 1.40039  | 0.527837 | 0.536617  | 0.715742    | 0.734776     |
| Asbestosis [Global]                                             | Female | 0-6 days    | 80+ years | 0.856584            | 1.706    | 0.697113 | 0.707529  | 0.572145    | 0.575385     |
| Other pneumoconiosis [Global]                                   | Male   | 0-6 days    | 80+ years | 0.295102            | 0.659377 | 0.202672 | 0.209191  | 0.983825    | 0.97901      |
| Other pneumoconiosis [Global]                                   | Female | 0-6 days    | 80+ years | 0.451955            | 0.922729 | 0.312399 | 0.336793  | 0.915565    | 0.88803      |
| Other chronic respiratory diseases [Global]                     | Male   | 0-6 days    | 80+ years | 0.398143            | 0.658407 | 0.230832 | 0.228993  | 0.999041    | 0.987399     |
| Cardiomyopathy and myocarditis [Global]                         | Male   | 0-6 days    | 80+ years | 0.250984            | 0.460313 | 0.157951 | 0.165789  | 0.999158    | 0.976814     |
| Cardiomyopathy and myocarditis [Global]                         | Female | 0-6 days    | 80+ years | 0.23834             | 0.505763 | 0.160754 | 0.167175  | 0.999059    | 0.979949     |
| Interstitial nephritis and urinary tract infections [Global]    | Male   | 0-6 days    | 80+ years | 0.319793            | 0.593701 | 0.195313 | 0.199719  | 0.999159    | 0.98587      |
| Interstitial nephritis and urinary tract infections [Data Rich] | Female | 0-6 days    | 80+ years | 0.269274            | 0.32451  | 0.170773 | 0.192106  | 0.999055    | 0.998369     |
| Interstitial nephritis and urinary tract infections [Global]    | Female | 0-6 days    | 80+ years | 0.281593            | 0.549433 | 0.180862 | 0.196099  | 0.999152    | 0.98237      |
| Malignant skin melanoma [Global]                                | Male   | 15-19 years | 80+ years | 0.313044            | 0.456674 | 0.238482 | 0.242633  | 0.998837    | 0.991342     |
| Malignant skin melanoma [Global]                                | Female | 15-19 years | 80+ years | 0.290713            | 0.426007 | 0.230092 | 0.220124  | 0.998305    | 0.99137      |
| Prostate cancer [Global]                                        | Male   | 15-19 years | 80+ years | 0.359223            | 0.437882 | 0.275425 | 0.269968  | 0.995649    | 0.985716     |
| Interstitial nephritis and urinary tract infections [Data Rich] | Male   | 0-6 days    | 80+ years | 0.270685            | 0.320129 | 0.168228 | 0.183862  | 0.999072    | 0.998286     |
| Kidney cancer [Global]                                          | Male   | 28-364 days | 80+ years | 0.314755            | 0.430669 | 0.26012  | 0.268004  | 0.998815    | 0.993162     |
| Kidney cancer [Data Rich]                                       | Male   | 28-364 days | 80+ years | 0.260868            | 0.3111   | 0.219707 | 0.246669  | 0.998029    | 0.9965       |
| Kidney cancer [Global]                                          | Female | 28-364 days | 80+ years | 0.325223            | 0.462785 | 0.267593 | 0.282602  | 0.999027    | 0.992144     |
| Kidney cancer [Data Rich]                                       | Female | 28-364 days | 80+ years | 0.277883            | 0.33386  | 0.23482  | 0.258935  | 0.998537    | 0.997156     |
| Bladder cancer [Global]                                         | Male   | 15-19 years | 80+ years | 0.302561            | 0.433254 | 0.243984 | 0.244194  | 0.997993    | 0.990885     |
| Bladder cancer [Global]                                         | Female | 15-19 years | 80+ years | 0.332237            | 0.482368 | 0.267378 | 0.278164  | 0.994702    | 0.990326     |
| Thyroid cancer [Global]                                         | Male   | 10-14 years | 80+ years | 0.386704            | 0.490533 | 0.30511  | 0.298633  | 0.992931    | 0.989852     |
| Thyroid cancer [Data Rich]                                      | Male   | 10-14 years | 80+ years | 0.318125            | 0.384007 | 0.272302 | 0.293744  | 0.993035    | 0.990499     |
| Thyroid cancer [Data Rich]                                      | Female | 10-14 years | 80+ years | 0.390965            | 0.469181 | 0.330885 | 0.344486  | 0.982842    | 0.978791     |
| Mesothelioma [Global]                                           | Male   | 15-19 years | 80+ years | 0.333464            | 0.541584 | 0.267427 | 0.268572  | 0.999223    | 0.993907     |
| Mesothelioma [Data Rich]                                        | Male   | 15-19 years | 80+ years | 0.301885            | 0.416756 | 0.259511 | 0.266787  | 0.998977    | 0.997521     |
| Mesothelioma [Global]                                           | Female | 15-19 years | 80+ years | 0.334721            | 0.526524 | 0.263788 | 0.263569  | 0.99836     | 0.994058     |
| Mesothelioma [Data Rich]                                        | Female | 15-19 years | 80+ years | 0.296068            | 0.409144 | 0.248659 | 0.215724  | 0.998023    | 0.996154     |
| Non-Hodgkin lymphoma [Global]                                   | Female | 28-364 days | 80+ years | 0.291953            | 0.406723 | 0.218606 | 0.222847  | 0.999117    | 0.994385     |
| Multiple myeloma [Data Rich]                                    | Female | 15-19 years | 80+ years | 0.239585            | 0.285912 | 0.199032 | 0.221908  | 0.998399    | 0.997601     |
| Multiple myeloma [Data Rich]                                    | Male   | 15-19 years | 80+ years | 0.234733            | 0.277252 | 0.194235 | 0.214818  | 0.997828    | 0.996446     |
| Lymphoid leukemia [Data Rich]                                   | Male   | 28-364 days | 80+ years | 0.259791            | 0.327872 | 0.223759 | 0.214664  | 0.997285    | 0.994384     |
| Lymphoid leukemia [Global]                                      | Male   | 28-364 days | 80+ years | 0.296545            | 0.414002 | 0.245704 | 0.239179  | 0.998038    | 0.989861     |
| Chronic lymphoid leukemia [Global]                              | Female | 15-19 years | 80+ years | 0.273828            | 0.448008 | 0.20869  | 0.209412  | 0.997754    | 0.98794      |
| Chronic lymphoid leukemia [Data Rich]                           | Female | 15-19 years | 80+ years | 0.208156            | 0.284473 | 0.170142 | 0.150967  | 0.99783     | 0.996844     |

Appendix Table 11: CODEm predictive validity results by cause, sex, age, and location

| Cause                                                        | Sex    | Age start   | Age end   | Predictive validity |          |          |           |             |              |
|--------------------------------------------------------------|--------|-------------|-----------|---------------------|----------|----------|-----------|-------------|--------------|
|                                                              |        |             |           | RMSE in             | RMSE out | Trend in | Trend out | Coverage in | Coverage out |
| Chronic lymphoid leukemia [Global]                           | Male   | 15-19 years | 80+ years | 0-324657            | 0-565171 | 0-246054 | 0-231123  | 0-993437    | 0-978918     |
| Chronic lymphoid leukemia [Data Rich]                        | Male   | 15-19 years | 80+ years | 0-251717            | 0-375992 | 0-202832 | 0-165172  | 0-995506    | 0-993173     |
| Myeloid leukemia [Global]                                    | Male   | 28-364 days | 80+ years | 0-264107            | 0-367963 | 0-22826  | 0-235117  | 0-998559    | 0-995366     |
| Myeloid leukemia [Data Rich]                                 | Male   | 28-364 days | 80+ years | 0-241722            | 0-310425 | 0-21654  | 0-215431  | 0-998226    | 0-996441     |
| Myeloid leukemia [Global]                                    | Female | 28-364 days | 80+ years | 0-262614            | 0-368953 | 0-221638 | 0-222605  | 0-998953    | 0-995737     |
| Myeloid leukemia [Data Rich]                                 | Female | 28-364 days | 80+ years | 0-233866            | 0-300389 | 0-207117 | 0-211628  | 0-998643    | 0-997247     |
| Pneumoconiosis [Global]                                      | Male   | 1-4 years   | 80+ years | 0-274768            | 0-713999 | 0-192624 | 0-191428  | 0-999018    | 0-975007     |
| Pneumoconiosis [Global]                                      | Female | 1-4 years   | 80+ years | 0-431497            | 0-782126 | 0-26325  | 0-285921  | 0-998566    | 0-975428     |
| Silicosis [Global]                                           | Female | 0-6 days    | 80+ years | 0-738095            | 1-42628  | 0-603635 | 0-605145  | 0-965418    | 0-940557     |
| Silicosis [Global]                                           | Male   | 0-6 days    | 80+ years | 0-564803            | 1-27714  | 0-410848 | 0-377914  | 0-975789    | 0-942476     |
| Coal workers pneumoconiosis [Global]                         | Female | 0-6 days    | 80+ years | 0-853552            | 1-40888  | 0-704702 | 0-738858  | 0-956795    | 0-941497     |
| Coal workers pneumoconiosis [Global]                         | Male   | 0-6 days    | 80+ years | 0-756784            | 1-56009  | 0-60667  | 0-605158  | 0-93227     | 0-89397      |
| Interstitial lung disease and pulmonary sarcoidosis [Global] | Male   | 1-4 years   | 80+ years | 0-310765            | 0-522206 | 0-181818 | 0-184781  | 0-999596    | 0-985892     |
| Decubitus ulcer [Global]                                     | Male   | 1-4 years   | 80+ years | 0-608107            | 1-09648  | 0-330465 | 0-335455  | 0-861304    | 0-868183     |
| Decubitus ulcer [Global]                                     | Female | 1-4 years   | 80+ years | 0-54698             | 1-06626  | 0-37974  | 0-382958  | 0-831532    | 0-817362     |
| Decubitus ulcer [Data Rich]                                  | Female | 1-4 years   | 80+ years | 0-518654            | 0-709457 | 0-351469 | 0-397348  | 0-791189    | 0-788037     |
| Urinary diseases and male infertility [Data Rich]            | Male   | 0-6 days    | 80+ years | 0-203483            | 0-259476 | 0-147471 | 0-168749  | 0-999281    | 0-998366     |
| Decubitus ulcer [Data Rich]                                  | Male   | 1-4 years   | 80+ years | 0-365486            | 0-58608  | 0-260101 | 0-234412  | 0-828238    | 0-823708     |
| Dengue [Data Rich]                                           | Female | 28-364 days | 80+ years | 0-97684             | 1-39386  | 0-760718 | 0-75561   | 0-986668    | 0-974323     |
| Dengue [Data Rich]                                           | Male   | 28-364 days | 80+ years | 0-927027            | 1-35168  | 0-732674 | 0-783196  | 0-993862    | 0-982456     |
| Rabies [Data Rich]                                           | Male   | 28-364 days | 80+ years | 0-768906            | 1-10687  | 0-620719 | 0-655008  | 0-988712    | 0-975754     |
| Rabies [Data Rich]                                           | Female | 28-364 days | 80+ years | 0-968031            | 1-35806  | 0-81295  | 0-804398  | 0-98589     | 0-970312     |
| Other intestinal infectious diseases [Global]                | Male   | 28-364 days | 80+ years | 0-992589            | 1-6831   | 0-780051 | 0-822336  | 0-989752    | 0-948416     |
| Other intestinal infectious diseases [Global]                | Female | 28-364 days | 80+ years | 0-999257            | 1-70492  | 0-76854  | 0-7996    | 0-990149    | 0-942503     |
| Cocaine use disorders [Global]                               | Male   | 15-19 years | 80+ years | 0-493227            | 1-15637  | 0-327438 | 0-356076  | 0-999086    | 0-976314     |
| Cocaine use disorders [Global]                               | Female | 15-19 years | 80+ years | 0-57383             | 1-19213  | 0-391823 | 0-42643   | 0-997849    | 0-956477     |
| Amphetamine use disorders [Global]                           | Male   | 15-19 years | 80+ years | 0-679792            | 1-40702  | 0-503698 | 0-5731    | 0-997402    | 0-945715     |
| Amphetamine use disorders [Global]                           | Female | 15-19 years | 80+ years | 0-622953            | 1-36037  | 0-454983 | 0-506928  | 0-99776     | 0-95143      |
| Opioid use disorders [Global]                                | Male   | 15-19 years | 80+ years | 0-337551            | 0-746751 | 0-219074 | 0-226597  | 0-99925     | 0-985253     |
| Opioid use disorders [Global]                                | Female | 15-19 years | 80+ years | 0-373499            | 0-684078 | 0-230164 | 0-229015  | 0-999761    | 0-986357     |
| Transport injuries [Global]                                  | Male   | 0-6 days    | 80+ years | 0-283889            | 0-45019  | 0-262422 | 0-256959  | 0-998844    | 0-981899     |
| Transport injuries [Global]                                  | Female | 0-6 days    | 80+ years | 0-29309             | 0-472199 | 0-262526 | 0-257035  | 0-998445    | 0-986108     |
| Assault by firearm [Global]                                  | Male   | 0-6 days    | 80+ years | 0-391295            | 0-849985 | 0-270406 | 0-274143  | 0-993582    | 0-955928     |
| Assault by firearm [Global]                                  | Female | 0-6 days    | 80+ years | 0-370184            | 0-698896 | 0-251335 | 0-250881  | 0-996601    | 0-979617     |
| Assault by sharp object [Global]                             | Male   | 0-6 days    | 80+ years | 0-300224            | 0-599585 | 0-212204 | 0-218017  | 0-998704    | 0-980926     |
| Assault by sharp object [Global]                             | Female | 0-6 days    | 80+ years | 0-31063             | 0-564817 | 0-229442 | 0-229475  | 0-998523    | 0-989687     |
| Assault by other means [Global]                              | Male   | 0-6 days    | 80+ years | 0-27301             | 0-500816 | 0-182102 | 0-186098  | 0-998943    | 0-989735     |
| Assault by other means [Global]                              | Female | 0-6 days    | 80+ years | 0-271816            | 0-427785 | 0-177985 | 0-181265  | 0-999308    | 0-992072     |
| Falls [Global]                                               | Male   | 0-6 days    | 80+ years | 0-343073            | 0-524578 | 0-303459 | 0-301548  | 0-998134    | 0-984439     |
| Falls [Global]                                               | Female | 0-6 days    | 80+ years | 0-379093            | 0-588289 | 0-340659 | 0-337178  | 0-997436    | 0-987849     |
| Drowning [Global]                                            | Male   | 0-6 days    | 80+ years | 0-32393             | 0-560614 | 0-282109 | 0-268935  | 0-998002    | 0-983663     |
| Drowning [Global]                                            | Female | 0-6 days    | 80+ years | 0-366486            | 0-674595 | 0-299785 | 0-295072  | 0-998377    | 0-982983     |
| Exposure to mechanical forces [Global]                       | Male   | 0-6 days    | 80+ years | 0-260603            | 0-518572 | 0-186527 | 0-191416  | 0-998254    | 0-982418     |
| Exposure to mechanical forces [Global]                       | Female | 0-6 days    | 80+ years | 0-289234            | 0-534082 | 0-211625 | 0-222254  | 0-998539    | 0-989168     |
| Unintentional firearm injuries [Global]                      | Male   | 0-6 days    | 80+ years | 0-380002            | 0-757248 | 0-249882 | 0-270237  | 0-998297    | 0-981973     |
| Unintentional suffocation [Global]                           | Male   | 0-6 days    | 80+ years | 0-444429            | 0-807109 | 0-320102 | 0-309778  | 0-984917    | 0-977693     |
| Adverse effects of medical treatment [Global]                | Male   | 0-6 days    | 80+ years | 0-378485            | 0-596084 | 0-212628 | 0-216427  | 0-995999    | 0-975618     |
| Adverse effects of medical treatment [Global]                | Female | 0-6 days    | 80+ years | 0-363599            | 0-573081 | 0-227408 | 0-23447   | 0-996762    | 0-985618     |
| Tracheal, bronchus, and lung cancer [Global]                 | Male   | 15-19 years | 80+ years | 0-228214            | 0-381209 | 0-181738 | 0-18932   | 0-99663     | 0-965859     |
| Tracheal, bronchus, and lung cancer [Data Rich]              | Male   | 15-19 years | 80+ years | 0-191288            | 0-229277 | 0-156429 | 0-176259  | 0-995026    | 0-991993     |
| Tracheal, bronchus, and lung cancer [Global]                 | Female | 15-19 years | 80+ years | 0-241892            | 0-389713 | 0-190336 | 0-197429  | 0-997265    | 0-980216     |
| Tracheal, bronchus, and lung cancer [Data Rich]              | Female | 15-19 years | 80+ years | 0-194024            | 0-231102 | 0-157856 | 0-174011  | 0-995272    | 0-992137     |
| Animal contact [Global]                                      | Male   | 0-6 days    | 80+ years | 0-345879            | 0-725646 | 0-227677 | 0-22053   | 0-998105    | 0-98202      |
| Animal contact [Global]                                      | Female | 0-6 days    | 80+ years | 0-362565            | 0-741864 | 0-242731 | 0-242933  | 0-998465    | 0-977259     |
| Venomous animal contact [Global]                             | Male   | 0-6 days    | 80+ years | 0-436457            | 0-876913 | 0-324968 | 0-332817  | 0-997237    | 0-951199     |
| Venomous animal contact [Global]                             | Female | 0-6 days    | 80+ years | 0-467447            | 0-933198 | 0-353029 | 0-361668  | 0-967595    | 0-94657      |
| Non-venomous animal contact [Global]                         | Male   | 0-6 days    | 80+ years | 0-303467            | 0-615797 | 0-213451 | 0-223971  | 0-999141    | 0-989831     |
| Non-venomous animal contact [Global]                         | Female | 0-6 days    | 80+ years | 0-311477            | 0-62753  | 0-222653 | 0-214792  | 0-99797     | 0-990292     |
| Foreign body in other body part [Global]                     | Male   | 0-6 days    | 80+ years | 0-346611            | 0-71392  | 0-205642 | 0-22207   | 0-993198    | 0-982294     |
| Foreign body in other body part [Global]                     | Female | 0-6 days    | 80+ years | 0-362749            | 0-798859 | 0-221562 | 0-221464  | 0-992403    | 0-976916     |
| Environmental heat and cold exposure [Global]                | Male   | 0-6 days    | 80+ years | 0-347843            | 0-626097 | 0-226784 | 0-224232  | 0-998337    | 0-985044     |
| Environmental heat and cold exposure [Global]                | Female | 0-6 days    | 80+ years | 0-440412            | 0-769469 | 0-270234 | 0-279483  | 0-997114    | 0-981817     |
| Other unintentional injuries [Global]                        | Male   | 0-6 days    | 80+ years | 0-311686            | 0-567538 | 0-214164 | 0-240918  | 0-997571    | 0-982679     |
| Other unintentional injuries [Global]                        | Female | 0-6 days    | 80+ years | 0-369476            | 0-671033 | 0-259216 | 0-260934  | 0-997012    | 0-979021     |
| Unintentional suffocation [Global]                           | Female | 0-6 days    | 80+ years | 0-4887              | 0-924078 | 0-274664 | 0-269942  | 0-950526    | 0-94733      |
| Unintentional firearm injuries [Global]                      | Female | 0-6 days    | 80+ years | 0-412714            | 0-746066 | 0-269471 | 0-271899  | 0-997979    | 0-98489      |
| Gynecological diseases [Global]                              | Female | 15-19 years | 80+ years | 0-548792            | 0-91314  | 0-397222 | 0-422307  | 0-9909      | 0-961432     |
| Gynecological diseases [Data Rich]                           | Female | 15-19 years | 80+ years | 0-391579            | 0-49923  | 0-310246 | 0-347241  | 0-99596     | 0-992389     |
| Pneumoconiosis [Data Rich]                                   | Male   | 1-4 years   | 80+ years | 0-193949            | 0-335803 | 0-142766 | 0-143396  | 0-999649    | 0-999111     |
| Pneumoconiosis [Data Rich]                                   | Female | 1-4 years   | 80+ years | 0-260064            | 0-485382 | 0-188654 | 0-223199  | 0-998849    | 0-997762     |
| Silicosis [Data Rich]                                        | Male   | 0-6 days    | 80+ years | 0-451497            | 0-67509  | 0-342666 | 0-262594  | 0-975622    | 0-969533     |
| Silicosis [Data Rich]                                        | Female | 0-6 days    | 80+ years | 0-603085            | 0-876895 | 0-499035 | 0-564117  | 0-960555    | 0-952949     |
| Asbestosis [Data Rich]                                       | Female | 0-6 days    | 80+ years | 0-730226            | 1-16868  | 0-591485 | 0-660837  | 0-492349    | 0-485559     |
| Asbestosis [Data Rich]                                       | Male   | 0-6 days    | 80+ years | 0-661634            | 1-04559  | 0-447296 | 0-427334  | 0-669254    | 0-666376     |
| Coal workers pneumoconiosis [Data Rich]                      | Female | 0-6 days    | 80+ years | 0-749455            | 1-25291  | 0-62212  | 0-786242  | 0-943803    | 0-931269     |
| Motorcyclist road injuries [Global]                          | Female | 0-6 days    | 80+ years | 0-314399            | 0-633195 | 0-21735  | 0-230157  | 0-99847     | 0-990342     |

**Appendix Table 11: CODEm predictive validity results by cause, sex, age, and location**

| Cause                                                           | Sex    | Age start   | Age end     | Predictive validity |          |          |           |             |              |
|-----------------------------------------------------------------|--------|-------------|-------------|---------------------|----------|----------|-----------|-------------|--------------|
|                                                                 |        |             |             | RMSE in             | RMSE out | Trend in | Trend out | Coverage in | Coverage out |
| Coal workers pneumoconiosis [Data Rich]                         | Male   | 0-6 days    | 80+ years   | 0.647527            | 0.973172 | 0.521585 | 0.430946  | 0.918164    | 0.907193     |
| Other pneumoconiosis [Data Rich]                                | Male   | 0-6 days    | 80+ years   | 0.203749            | 0.370089 | 0.149022 | 0.147903  | 0.99952     | 0.998736     |
| Other pneumoconiosis [Data Rich]                                | Female | 0-6 days    | 80+ years   | 0.309645            | 0.565709 | 0.228759 | 0.24275   | 0.998098    | 0.996462     |
| Interstitial lung disease and pulmonary sarcoidosis [Data Rich] | Male   | 1-4 years   | 80+ years   | 0.264526            | 0.383919 | 0.170394 | 0.171602  | 0.999788    | 0.999315     |
| Interstitial lung disease and pulmonary sarcoidosis [Data Rich] | Female | 1-4 years   | 80+ years   | 0.242468            | 0.374141 | 0.160849 | 0.164833  | 0.999865    | 0.999588     |
| Other chronic respiratory diseases [Data Rich]                  | Male   | 0-6 days    | 80+ years   | 0.24603             | 0.380977 | 0.186108 | 0.196881  | 0.999229    | 0.99803      |
| Other chronic respiratory diseases [Data Rich]                  | Female | 0-6 days    | 80+ years   | 0.307943            | 0.430853 | 0.216755 | 0.211372  | 0.964427    | 0.96724      |
| Parkinson disease [Data Rich]                                   | Male   | 20-24 years | 80+ years   | 0.204634            | 0.288402 | 0.143224 | 0.166153  | 0.999834    | 0.999305     |
| Parkinson disease [Data Rich]                                   | Female | 20-24 years | 80+ years   | 0.21426             | 0.292921 | 0.149066 | 0.157488  | 0.999609    | 0.998857     |
| Multiple sclerosis [Global]                                     | Male   | 20-24 years | 80+ years   | 0.265594            | 0.445323 | 0.201367 | 0.20526   | 0.999444    | 0.994219     |
| Multiple sclerosis [Global]                                     | Female | 20-24 years | 80+ years   | 0.273732            | 0.45904  | 0.207274 | 0.204134  | 0.999434    | 0.991673     |
| Other neurological disorders [Global]                           | Male   | 28-364 days | 80+ years   | 0.229709            | 0.35993  | 0.175619 | 0.177893  | 0.999384    | 0.996783     |
| Other neurological disorders [Global]                           | Female | 28-364 days | 80+ years   | 0.242752            | 0.397001 | 0.182939 | 0.1881    | 0.999286    | 0.994985     |
| Uterine fibroids [Global]                                       | Female | 15-19 years | 80+ years   | 0.831259            | 1.42167  | 0.581183 | 0.559292  | 0.954769    | 0.920437     |
| Uterine fibroids [Data Rich]                                    | Female | 15-19 years | 80+ years   | 0.610697            | 0.898121 | 0.481093 | 0.414885  | 0.808729    | 0.8004       |
| Endometriosis [Global]                                          | Female | 15-19 years | 50-54 years | 1.2887              | 2.06984  | 1.08835  | 1.11301   | 0.974465    | 0.928213     |
| Endometriosis [Data Rich]                                       | Female | 15-19 years | 50-54 years | 1.20897             | 1.7166   | 1.03484  | 1.08318   | 0.968283    | 0.939262     |
| Genital prolapse [Global]                                       | Female | 15-19 years | 80+ years   | 0.822904            | 1.49475  | 0.662316 | 0.664792  | 0.92441     | 0.903091     |
| Genital prolapse [Data Rich]                                    | Female | 15-19 years | 80+ years   | 0.72838             | 1.04514  | 0.613509 | 0.553516  | 0.921189    | 0.913021     |
| Other gynecological diseases [Data Rich]                        | Female | 15-19 years | 80+ years   | 0.475032            | 0.606628 | 0.376061 | 0.34065   | 0.994097    | 0.988637     |
| Other gynecological diseases [Global]                           | Female | 15-19 years | 80+ years   | 0.612702            | 1.02632  | 0.442508 | 0.450577  | 0.99154     | 0.968759     |
| Interpersonal violence [Global]                                 | Male   | 0-6 days    | 80+ years   | 0.391595            | 0.637331 | 0.290019 | 0.298479  | 0.995107    | 0.967457     |
| Interpersonal violence [Global]                                 | Female | 0-6 days    | 80+ years   | 0.394438            | 0.611023 | 0.305606 | 0.33      | 0.996401    | 0.980251     |
| Road injuries [Global]                                          | Male   | 0-6 days    | 80+ years   | 0.198869            | 0.346068 | 0.141742 | 0.149475  | 0.999342    | 0.982767     |
| Road injuries [Global]                                          | Female | 0-6 days    | 80+ years   | 0.223423            | 0.388485 | 0.159485 | 0.167295  | 0.999641    | 0.990614     |
| Pedestrian road injuries [Global]                               | Male   | 0-6 days    | 80+ years   | 0.266094            | 0.488447 | 0.191059 | 0.205695  | 0.996248    | 0.977509     |
| Pedestrian road injuries [Global]                               | Female | 0-6 days    | 80+ years   | 0.256462            | 0.470118 | 0.187008 | 0.196327  | 0.998889    | 0.986837     |
| Cyclist road injuries [Global]                                  | Male   | 1-4 years   | 80+ years   | 0.237389            | 0.509128 | 0.170398 | 0.175508  | 0.999676    | 0.986986     |
| Cyclist road injuries [Global]                                  | Female | 1-4 years   | 80+ years   | 0.266409            | 0.613297 | 0.195219 | 0.200679  | 0.999748    | 0.990056     |
| Motorcyclist road injuries [Global]                             | Male   | 0-6 days    | 80+ years   | 0.303464            | 0.572642 | 0.174362 | 0.18031   | 0.999341    | 0.987466     |
| Self-harm and interpersonal violence [Global]                   | Male   | 0-6 days    | 80+ years   | 0.29019             | 0.492338 | 0.201151 | 0.217769  | 0.996937    | 0.975039     |
| Self-harm and interpersonal violence [Global]                   | Female | 0-6 days    | 80+ years   | 0.309662            | 0.520317 | 0.219455 | 0.228596  | 0.997812    | 0.984819     |
| Other road injuries [Global]                                    | Male   | 0-6 days    | 80+ years   | 0.444017            | 0.952973 | 0.277641 | 0.284919  | 0.99625     | 0.973205     |
| Other road injuries [Global]                                    | Female | 0-6 days    | 80+ years   | 0.392116            | 0.821406 | 0.276312 | 0.28834   | 0.995148    | 0.982153     |
| Other drug use disorders [Global]                               | Male   | 15-19 years | 80+ years   | 0.405841            | 0.862877 | 0.27429  | 0.292883  | 0.998244    | 0.978518     |
| Other drug use disorders [Global]                               | Female | 15-19 years | 80+ years   | 0.373594            | 0.760292 | 0.237787 | 0.24736   | 0.999391    | 0.986255     |
| Chronic obstructive pulmonary disease [Data Rich]               | Female | 28-364 days | 80+ years   | 0.166288            | 0.320895 | 0.126212 | 0.131782  | 0.99989     | 0.999297     |
| Chronic obstructive pulmonary disease [Data Rich]               | Male   | 28-364 days | 80+ years   | 0.161432            | 0.271297 | 0.127485 | 0.133559  | 0.999763    | 0.999052     |
| Motor neuron disease [Global]                                   | Male   | 0-6 days    | 80+ years   | 0.286544            | 0.53082  | 0.184346 | 0.17945   | 0.998616    | 0.984688     |
| Motor neuron disease [Global]                                   | Female | 0-6 days    | 80+ years   | 0.372456            | 0.665962 | 0.242236 | 0.246536  | 0.99725     | 0.983782     |
| Motor neuron disease [Data Rich]                                | Male   | 0-6 days    | 80+ years   | 0.223626            | 0.381155 | 0.15729  | 0.156351  | 0.999255    | 0.998484     |
| Motor neuron disease [Data Rich]                                | Female | 0-6 days    | 80+ years   | 0.313087            | 0.491644 | 0.222994 | 0.217376  | 0.997634    | 0.996171     |
| Musculoskeletal disorders [Global]                              | Male   | 5-9 years   | 80+ years   | 0.261301            | 0.486206 | 0.186022 | 0.194614  | 0.99949     | 0.991262     |
| Musculoskeletal disorders [Global]                              | Female | 5-9 years   | 80+ years   | 0.277164            | 0.593832 | 0.182925 | 0.186858  | 0.999108    | 0.975233     |
| Neural tube defects [Data Rich]                                 | Male   | 0-6 days    | 80+ years   | 0.387562            | 0.610863 | 0.289679 | 0.274562  | 0.924318    | 0.919164     |
| Neural tube defects [Data Rich]                                 | Female | 0-6 days    | 80+ years   | 0.407466            | 0.633727 | 0.30585  | 0.322645  | 0.903004    | 0.898146     |
| Other neonatal disorders [Data Rich]                            | Female | 0-6 days    | 1-4 years   | 0.256939            | 0.432072 | 0.191114 | 0.229032  | 0.999249    | 0.997859     |
| Other neonatal disorders [Data Rich]                            | Male   | 0-6 days    | 1-4 years   | 0.251125            | 0.450355 | 0.18285  | 0.221078  | 0.999127    | 0.997866     |
| Neural tube defects [Global]                                    | Male   | 0-6 days    | 80+ years   | 0.49258             | 0.997166 | 0.373257 | 0.383187  | 0.930921    | 0.943851     |
| Neural tube defects [Global]                                    | Female | 0-6 days    | 80+ years   | 0.546155            | 1.03276  | 0.397349 | 0.404458  | 0.912696    | 0.944348     |
| Congenital heart anomalies [Data Rich]                          | Male   | 0-6 days    | 80+ years   | 0.176974            | 0.256403 | 0.137396 | 0.158236  | 0.999923    | 0.999645     |
| Congenital heart anomalies [Data Rich]                          | Female | 0-6 days    | 80+ years   | 0.176007            | 0.255777 | 0.136717 | 0.153607  | 0.999923    | 0.999709     |
| Congenital heart anomalies [Global]                             | Male   | 0-6 days    | 80+ years   | 0.249756            | 0.434542 | 0.206677 | 0.195221  | 0.999584    | 0.994641     |
| Congenital heart anomalies [Global]                             | Female | 0-6 days    | 80+ years   | 0.265183            | 0.439025 | 0.224486 | 0.223761  | 0.999807    | 0.996273     |
| Cleft lip and cleft palate [Data Rich]                          | Male   | 0-6 days    | 1-4 years   | 0.812448            | 1.40346  | 0.703222 | 0.843667  | 0.920007    | 0.882407     |
| Cleft lip and cleft palate [Data Rich]                          | Female | 0-6 days    | 1-4 years   | 0.90533             | 1.57201  | 0.785559 | 0.91006   | 0.911418    | 0.854464     |
| Cleft lip and cleft palate [Global]                             | Male   | 0-6 days    | 1-4 years   | 0.90081             | 1.52796  | 0.761271 | 0.779874  | 0.924246    | 0.901679     |
| Cleft lip and cleft palate [Global]                             | Female | 0-6 days    | 1-4 years   | 1.027               | 1.64223  | 0.822165 | 0.830418  | 0.919947    | 0.87413      |
| Down syndrome [Data Rich]                                       | Male   | 0-6 days    | 80+ years   | 0.298413            | 0.5402   | 0.200183 | 0.224403  | 0.997676    | 0.997086     |
| Down syndrome [Data Rich]                                       | Female | 0-6 days    | 80+ years   | 0.363128            | 0.567814 | 0.213364 | 0.238244  | 0.994304    | 0.993344     |
| Down syndrome [Global]                                          | Male   | 0-6 days    | 80+ years   | 0.359432            | 0.651886 | 0.23758  | 0.245175  | 0.997585    | 0.99118      |
| Down syndrome [Global]                                          | Female | 0-6 days    | 80+ years   | 0.417238            | 0.69618  | 0.262274 | 0.265475  | 0.992965    | 0.992354     |
| Other chromosomal abnormalities [Data Rich]                     | Male   | 0-6 days    | 80+ years   | 0.485854            | 1.0171   | 0.317982 | 0.308168  | 0.790971    | 0.789899     |
| Other chromosomal abnormalities [Data Rich]                     | Female | 0-6 days    | 80+ years   | 0.566907            | 1.01064  | 0.339849 | 0.326814  | 0.791833    | 0.789805     |
| Alcohol use disorders [Global]                                  | Male   | 15-19 years | 80+ years   | 0.239194            | 0.612527 | 0.173572 | 0.182927  | 0.99907     | 0.94774      |
| Alcohol use disorders [Global]                                  | Female | 15-19 years | 80+ years   | 0.268869            | 0.696149 | 0.198983 | 0.204312  | 0.999053    | 0.967496     |
| Drug use disorders [Global]                                     | Male   | 15-19 years | 80+ years   | 0.344071            | 0.744503 | 0.224297 | 0.236649  | 0.998165    | 0.958979     |
| Drug use disorders [Global]                                     | Female | 15-19 years | 80+ years   | 0.36368             | 0.708413 | 0.248862 | 0.270849  | 0.998016    | 0.97335      |
| Alcohol use disorders [Data Rich]                               | Male   | 15-19 years | 80+ years   | 0.199453            | 0.252674 | 0.150158 | 0.173813  | 0.999503    | 0.998353     |
| Alcohol use disorders [Data Rich]                               | Female | 15-19 years | 80+ years   | 0.220602            | 0.277758 | 0.170917 | 0.199168  | 0.999524    | 0.998561     |
| Polycystic ovarian syndrome [Data Rich]                         | Female | 15-19 years | 50-54 years | 0.387245            | 0.771971 | 0.285356 | 0.315243  | 0.996029    | 0.984019     |
| Hemoglobinopathies and hemolytic anemias [Data Rich]            | Male   | 0-6 days    | 80+ years   | 0.17901             | 0.276795 | 0.139014 | 0.159451  | 0.999921    | 0.999749     |
| Hemoglobinopathies and hemolytic anemias [Data Rich]            | Female | 0-6 days    | 80+ years   | 0.174756            | 0.264252 | 0.128765 | 0.146914  | 0.999976    | 0.999871     |
| Aortic aneurysm [Global]                                        | Male   | 15-19 years | 80+ years   | 0.182199            | 0.363829 | 0.130304 | 0.135468  | 0.999783    | 0.97444      |
| Aortic aneurysm [Global]                                        | Female | 15-19 years | 80+ years   | 0.203481            | 0.393351 | 0.144398 | 0.145741  | 0.99965     | 0.987712     |
| Ischemic stroke [Global]                                        | Male   | 28-364 days | 80+ years   | 0.197159            | 0.377334 | 0.135414 | 0.141827  | 0.999437    | 0.983448     |

Appendix Table 11: CODEm predictive validity results by cause, sex, age, and location

| Cause                                                       | Sex    | Age start   | Age end     | Predictive validity |          |           |           |             |              |
|-------------------------------------------------------------|--------|-------------|-------------|---------------------|----------|-----------|-----------|-------------|--------------|
|                                                             |        |             |             | RMSE in             | RMSE out | Trend in  | Trend out | Coverage in | Coverage out |
| Ischemic stroke [Global]                                    | Female | 28-364 days | 80+ years   | 0.212798            | 0.381924 | 0.145229  | 0.149829  | 0.999326    | 0.987279     |
| Polycystic ovarian syndrome [Global]                        | Female | 15-19 years | 50-54 years | 0.41505             | 0.811963 | 0.298443  | 0.267791  | 0.997606    | 0.983386     |
| Nasopharynx cancer [Global]                                 | Male   | 5-9 years   | 80+ years   | 0.345324            | 0.592894 | 0.279172  | 0.292845  | 0.998248    | 0.987922     |
| Nasopharynx cancer [Data Rich]                              | Male   | 5-9 years   | 80+ years   | 0.294965            | 0.355039 | 0.25459   | 0.284967  | 0.997242    | 0.99532      |
| Nasopharynx cancer [Global]                                 | Female | 5-9 years   | 80+ years   | 0.430091            | 0.66779  | 0.358953  | 0.352335  | 0.983778    | 0.973491     |
| Nasopharynx cancer [Data Rich]                              | Female | 5-9 years   | 80+ years   | 0.39848             | 0.488929 | 0.3444    | 0.393536  | 0.978754    | 0.976441     |
| Other pharynx cancer [Global]                               | Male   | 15-19 years | 80+ years   | 0.296629            | 0.520968 | 0.231789  | 0.231996  | 0.996492    | 0.977258     |
| Other pharynx cancer [Data Rich]                            | Male   | 15-19 years | 80+ years   | 0.252717            | 0.313299 | 0.203227  | 0.219991  | 0.994838    | 0.992681     |
| Other pharynx cancer [Data Rich]                            | Female | 15-19 years | 80+ years   | 0.311859            | 0.373677 | 0.268036  | 0.29697   | 0.986151    | 0.984534     |
| Rheumatoid arthritis [Data Rich]                            | Male   | 5-9 years   | 80+ years   | 0.313346            | 0.423517 | 0.232025  | 0.236326  | 0.983007    | 0.9815       |
| Rheumatoid arthritis [Data Rich]                            | Female | 5-9 years   | 80+ years   | 0.320342            | 0.452763 | 0.237746  | 0.278044  | 0.991008    | 0.989767     |
| Rheumatoid arthritis [Global]                               | Male   | 5-9 years   | 80+ years   | 0.396668            | 0.849016 | 0.273352  | 0.286974  | 0.980281    | 0.951991     |
| Rheumatoid arthritis [Global]                               | Female | 5-9 years   | 80+ years   | 0.443895            | 0.837289 | 0.271747  | 0.291144  | 0.99056     | 0.958771     |
| Musculoskeletal disorders [Data Rich]                       | Male   | 5-9 years   | 80+ years   | 0.212992            | 0.275273 | 0.159907  | 0.178277  | 0.99975     | 0.999455     |
| Musculoskeletal disorders [Data Rich]                       | Female | 5-9 years   | 80+ years   | 0.211038            | 0.296461 | 0.15722   | 0.174727  | 0.999393    | 0.998761     |
| Peripheral vascular disease [Global]                        | Male   | 40-44 years | 80+ years   | 0.319626            | 0.665863 | 0.221345  | 0.22302   | 0.996146    | 0.962651     |
| Peripheral vascular disease [Global]                        | Female | 40-44 years | 80+ years   | 0.346023            | 0.785803 | 0.23743   | 0.244099  | 0.992567    | 0.963198     |
| Opioid use disorders [Global]                               | Male   | 0-6 days    | 7-27 days   | 0.296939            | 0.769561 | 0.0939752 | 0.109648  | 0.99994     | 0.98284      |
| Opioid use disorders [Global]                               | Female | 0-6 days    | 7-27 days   | 0.211257            | 0.466951 | 0.0750898 | 0.0860498 | 1           | 0.998582     |
| Sudden infant death syndrome [Global]                       | Male   | 7-27 days   | 28-364 days | 0.417649            | 0.803598 | 0.292182  | 0.307994  | 0.996311    | 0.966204     |
| Sudden infant death syndrome [Data Rich]                    | Male   | 7-27 days   | 28-364 days | 0.326999            | 0.529029 | 0.248444  | 0.310564  | 0.995568    | 0.98977      |
| Sudden infant death syndrome [Global]                       | Female | 7-27 days   | 28-364 days | 0.422621            | 0.812252 | 0.317634  | 0.3287    | 0.995032    | 0.968395     |
| Sudden infant death syndrome [Data Rich]                    | Female | 7-27 days   | 28-364 days | 0.361528            | 0.539902 | 0.285363  | 0.323151  | 0.994302    | 0.988993     |
| Drug use disorders [Global]                                 | Male   | 0-6 days    | 7-27 days   | 0.171187            | 0.432487 | 0.0635834 | 0.0632366 | 1           | 0.993335     |
| Drug use disorders [Global]                                 | Female | 0-6 days    | 7-27 days   | 0.206583            | 0.465464 | 0.0695082 | 0.0793245 | 1           | 0.99757      |
| Chagas disease [Global]                                     | Male   | 28-364 days | 80+ years   | 0.282802            | 0.318226 | 0.169846  | 0.153684  | 0.998575    | 0.997535     |
| Chagas disease [Global]                                     | Female | 28-364 days | 80+ years   | 0.286958            | 0.323409 | 0.17498   | 0.148181  | 0.998114    | 0.996921     |
| Transport injuries [Data Rich]                              | Male   | 0-6 days    | 80+ years   | 0.15741             | 0.191834 | 0.122443  | 0.140986  | 0.999693    | 0.998854     |
| Transport injuries [Data Rich]                              | Female | 0-6 days    | 80+ years   | 0.174237            | 0.214549 | 0.136713  | 0.15687   | 0.999775    | 0.99935      |
| Road injuries [Data Rich]                                   | Male   | 0-6 days    | 80+ years   | 0.163131            | 0.205248 | 0.126672  | 0.147742  | 0.999653    | 0.998966     |
| Road injuries [Data Rich]                                   | Female | 0-6 days    | 80+ years   | 0.181679            | 0.228234 | 0.142741  | 0.164664  | 0.999758    | 0.999421     |
| Pedestrian road injuries [Data Rich]                        | Male   | 0-6 days    | 80+ years   | 0.188023            | 0.294711 | 0.14636   | 0.174722  | 0.999566    | 0.99884      |
| Pedestrian road injuries [Data Rich]                        | Female | 0-6 days    | 80+ years   | 0.208126            | 0.329966 | 0.159937  | 0.195258  | 0.999384    | 0.99859      |
| Cyclist road injuries [Data Rich]                           | Male   | 1-4 years   | 80+ years   | 0.196334            | 0.319555 | 0.150443  | 0.172642  | 0.999788    | 0.999459     |
| Cyclist road injuries [Data Rich]                           | Female | 1-4 years   | 80+ years   | 0.227579            | 0.428564 | 0.175322  | 0.199114  | 0.999903    | 0.999619     |
| Motorcyclist road injuries [Data Rich]                      | Male   | 0-6 days    | 80+ years   | 0.209768            | 0.399901 | 0.151674  | 0.172994  | 0.999926    | 0.999225     |
| Motorcyclist road injuries [Data Rich]                      | Female | 0-6 days    | 80+ years   | 0.260476            | 0.474804 | 0.194035  | 0.214778  | 0.999137    | 0.99801      |
| Other road injuries [Data Rich]                             | Male   | 0-6 days    | 80+ years   | 0.330213            | 0.735164 | 0.241869  | 0.28014   | 0.995009    | 0.992723     |
| Other road injuries [Data Rich]                             | Female | 0-6 days    | 80+ years   | 0.352592            | 0.66904  | 0.25466   | 0.343641  | 0.993887    | 0.992041     |
| Unintentional injuries [Data Rich]                          | Male   | 28-364 days | 80+ years   | 0.162452            | 0.19904  | 0.13024   | 0.149903  | 0.999266    | 0.997978     |
| Unintentional injuries [Data Rich]                          | Female | 28-364 days | 80+ years   | 0.169806            | 0.20912  | 0.135688  | 0.158122  | 0.999248    | 0.99851      |
| Falls [Data Rich]                                           | Male   | 0-6 days    | 80+ years   | 0.177672            | 0.216141 | 0.138375  | 0.159085  | 0.999416    | 0.999032     |
| Falls [Data Rich]                                           | Female | 0-6 days    | 80+ years   | 0.18308             | 0.222138 | 0.139186  | 0.159124  | 0.99943     | 0.998825     |
| Drowning [Data Rich]                                        | Male   | 0-6 days    | 80+ years   | 0.180133            | 0.220055 | 0.140736  | 0.162489  | 0.999745    | 0.999317     |
| Drowning [Data Rich]                                        | Female | 0-6 days    | 80+ years   | 0.185746            | 0.233418 | 0.143101  | 0.163721  | 0.999737    | 0.999469     |
| Exposure to mechanical forces [Data Rich]                   | Male   | 0-6 days    | 80+ years   | 0.188444            | 0.253642 | 0.142124  | 0.161764  | 0.999894    | 0.997495     |
| Exposure to mechanical forces [Data Rich]                   | Female | 0-6 days    | 80+ years   | 0.194739            | 0.260763 | 0.144864  | 0.163647  | 0.999906    | 0.998025     |
| Unintentional firearm injuries [Data Rich]                  | Female | 0-6 days    | 80+ years   | 0.230928            | 0.347695 | 0.164147  | 0.194572  | 0.999534    | 0.99905      |
| Unintentional suffocation [Data Rich]                       | Male   | 0-6 days    | 80+ years   | 0.242873            | 0.44347  | 0.162988  | 0.178855  | 0.991802    | 0.990978     |
| Unintentional suffocation [Data Rich]                       | Female | 0-6 days    | 80+ years   | 0.277323            | 0.636534 | 0.173587  | 0.175288  | 0.955424    | 0.956664     |
| Adverse effects of medical treatment [Data Rich]            | Male   | 0-6 days    | 80+ years   | 0.200035            | 0.256949 | 0.13673   | 0.152363  | 0.999156    | 0.998043     |
| Adverse effects of medical treatment [Data Rich]            | Female | 0-6 days    | 80+ years   | 0.209257            | 0.271633 | 0.142904  | 0.158812  | 0.998835    | 0.997959     |
| Animal contact [Data Rich]                                  | Male   | 0-6 days    | 80+ years   | 0.237162            | 0.308002 | 0.178547  | 0.199961  | 0.999586    | 0.998888     |
| Animal contact [Data Rich]                                  | Female | 0-6 days    | 80+ years   | 0.263211            | 0.339243 | 0.200392  | 0.222792  | 0.999532    | 0.999077     |
| Venomous animal contact [Data Rich]                         | Male   | 0-6 days    | 80+ years   | 0.364098            | 0.558344 | 0.286484  | 0.342262  | 0.972486    | 0.970646     |
| Venomous animal contact [Data Rich]                         | Female | 0-6 days    | 80+ years   | 0.395624            | 0.555611 | 0.315982  | 0.365293  | 0.958659    | 0.95581      |
| Non-venomous animal contact [Data Rich]                     | Male   | 0-6 days    | 80+ years   | 0.25033             | 0.403081 | 0.192417  | 0.20808   | 0.999655    | 0.99919      |
| Non-venomous animal contact [Data Rich]                     | Female | 0-6 days    | 80+ years   | 0.263601            | 0.415761 | 0.200437  | 0.226941  | 0.999079    | 0.998399     |
| Foreign body [Data Rich]                                    | Male   | 0-6 days    | 80+ years   | 0.200774            | 0.279853 | 0.152086  | 0.168147  | 0.99931     | 0.998462     |
| Foreign body [Data Rich]                                    | Female | 0-6 days    | 80+ years   | 0.198711            | 0.278799 | 0.151055  | 0.162079  | 0.999539    | 0.998717     |
| Schizophrenia [Data Rich]                                   | Male   | 25-29 years | 80+ years   | 0.328985            | 0.472815 | 0.247967  | 0.283454  | 0.999151    | 0.99769      |
| Schizophrenia [Data Rich]                                   | Female | 25-29 years | 80+ years   | 0.337086            | 0.508316 | 0.251975  | 0.273396  | 0.989902    | 0.987763     |
| Pulmonary aspiration and foreign body in airway [Data Rich] | Male   | 0-6 days    | 80+ years   | 0.20459             | 0.357634 | 0.15276   | 0.167299  | 0.99945     | 0.998926     |
| Pulmonary aspiration and foreign body in airway [Data Rich] | Female | 0-6 days    | 80+ years   | 0.204002            | 0.366433 | 0.153622  | 0.164895  | 0.999622    | 0.999225     |
| Foreign body in other body part [Data Rich]                 | Male   | 0-6 days    | 80+ years   | 0.234183            | 0.452419 | 0.161259  | 0.190524  | 0.993886    | 0.993221     |
| Foreign body in other body part [Data Rich]                 | Female | 0-6 days    | 80+ years   | 0.266355            | 0.55455  | 0.186921  | 0.226246  | 0.991322    | 0.990451     |
| Eating disorders [Global]                                   | Male   | 5-9 years   | 45-49 years | 0.660347            | 0.897937 | 0.45233   | 0.460141  | 0.993138    | 0.978601     |
| Environmental heat and cold exposure [Data Rich]            | Male   | 0-6 days    | 80+ years   | 0.243058            | 0.325978 | 0.174697  | 0.19703   | 0.999041    | 0.99836      |
| Environmental heat and cold exposure [Data Rich]            | Female | 0-6 days    | 80+ years   | 0.27808             | 0.410647 | 0.205568  | 0.227444  | 0.998627    | 0.997651     |
| Eating disorders [Global]                                   | Female | 5-9 years   | 45-49 years | 0.66036             | 0.990841 | 0.454899  | 0.454186  | 0.992646    | 0.978331     |
| Other unintentional injuries [Data Rich]                    | Male   | 0-6 days    | 80+ years   | 0.215766            | 0.282631 | 0.164275  | 0.182113  | 0.998689    | 0.997259     |
| Other unintentional injuries [Data Rich]                    | Female | 0-6 days    | 80+ years   | 0.269426            | 0.340741 | 0.206861  | 0.230613  | 0.998481    | 0.997103     |
| Self-harm and interpersonal violence [Data Rich]            | Male   | 0-6 days    | 80+ years   | 0.178477            | 0.219018 | 0.13763   | 0.156179  | 0.998382    | 0.996633     |
| Eating disorders [Data Rich]                                | Male   | 5-9 years   | 45-49 years | 0.601725            | 0.804447 | 0.442624  | 0.467514  | 0.991924    | 0.988047     |
| Self-harm and interpersonal violence [Data Rich]            | Female | 0-6 days    | 80+ years   | 0.192316            | 0.234291 | 0.150929  | 0.173732  | 0.998958    | 0.997959     |
| Eating disorders [Data Rich]                                | Female | 5-9 years   | 45-49 years | 0.597074            | 0.707839 | 0.429007  | 0.410538  | 0.991878    | 0.987707     |



Appendix Table 11: CODEm predictive validity results by cause, sex, age, and location

| Cause                                                             | Sex    | Age start   | Age end   | Predictive validity |          |          |           |             |              |
|-------------------------------------------------------------------|--------|-------------|-----------|---------------------|----------|----------|-----------|-------------|--------------|
|                                                                   |        |             |           | RMSE in             | RMSE out | Trend in | Trend out | Coverage in | Coverage out |
| Interpersonal violence [Data Rich]                                | Female | 0-6 days    | 80+ years | 0.231404            | 0.29184  | 0.194979 | 0.24591   | 0.998606    | 0.996242     |
| Interpersonal violence [Data Rich]                                | Male   | 0-6 days    | 80+ years | 0.239231            | 0.301795 | 0.209759 | 0.27027   | 0.999596    | 0.998168     |
| Prostate cancer [Data Rich]                                       | Male   | 15-19 years | 80+ years | 0.276319            | 0.322874 | 0.224801 | 0.257638  | 0.997904    | 0.996337     |
| Assault by firearm [Data Rich]                                    | Male   | 0-6 days    | 80+ years | 0.307905            | 0.53833  | 0.228464 | 0.301595  | 0.996366    | 0.994029     |
| Assault by firearm [Data Rich]                                    | Female | 0-6 days    | 80+ years | 0.288122            | 0.450542 | 0.207892 | 0.235228  | 0.998476    | 0.99742      |
| Assault by sharp object [Data Rich]                               | Male   | 0-6 days    | 80+ years | 0.245345            | 0.410701 | 0.181978 | 0.225263  | 0.999104    | 0.99849      |
| Assault by sharp object [Data Rich]                               | Female | 0-6 days    | 80+ years | 0.255448            | 0.400136 | 0.194843 | 0.229798  | 0.999028    | 0.998139     |
| Testicular cancer [Global]                                        | Male   | 15-19 years | 80+ years | 0.350363            | 0.516668 | 0.282368 | 0.275422  | 0.998652    | 0.993452     |
| Assault by other means [Data Rich]                                | Male   | 0-6 days    | 80+ years | 0.199405            | 0.334886 | 0.151412 | 0.178979  | 0.999236    | 0.998548     |
| Assault by other means [Data Rich]                                | Female | 0-6 days    | 80+ years | 0.193929            | 0.289371 | 0.150287 | 0.174954  | 0.999448    | 0.998967     |
| Testicular cancer [Data Rich]                                     | Male   | 15-19 years | 80+ years | 0.290631            | 0.357037 | 0.24608  | 0.26489   | 0.998838    | 0.997797     |
| Unintentional firearm injuries [Data Rich]                        | Male   | 0-6 days    | 80+ years | 0.242201            | 0.355165 | 0.17219  | 0.189712  | 0.99846     | 0.996927     |
| Thyroid cancer [Global]                                           | Female | 10-14 years | 80+ years | 0.44209             | 0.617842 | 0.354264 | 0.363152  | 0.985002    | 0.978881     |
| Other infectious diseases [Data Rich]                             | Male   | 0-6 days    | 80+ years | 0.247567            | 0.336213 | 0.184589 | 0.216661  | 0.998824    | 0.997851     |
| Other infectious diseases [Data Rich]                             | Female | 0-6 days    | 80+ years | 0.275511            | 0.334582 | 0.187979 | 0.203087  | 0.999278    | 0.998756     |
| Other neglected tropical diseases [Data Rich]                     | Male   | 0-6 days    | 80+ years | 0.654855            | 0.83924  | 0.503456 | 0.546483  | 0.992488    | 0.985797     |
| Other neglected tropical diseases [Data Rich]                     | Female | 0-6 days    | 80+ years | 0.683054            | 0.915875 | 0.546277 | 0.594521  | 0.989435    | 0.980714     |
| Other neglected tropical diseases [Global]                        | Male   | 0-6 days    | 80+ years | 0.718068            | 1.33354  | 0.530034 | 0.548114  | 0.991652    | 0.949882     |
| Other neglected tropical diseases [Global]                        | Female | 0-6 days    | 80+ years | 0.757848            | 1.44572  | 0.591676 | 0.629764  | 0.98709     | 0.945003     |
| Neonatal preterm birth complications [Global]                     | Male   | 0-6 days    | 1-4 years | 0.407355            | 0.53129  | 0.354744 | 0.341522  | 0.998356    | 0.995542     |
| Neonatal preterm birth complications [Global]                     | Female | 0-6 days    | 1-4 years | 0.38925             | 0.566973 | 0.348593 | 0.347034  | 0.99786     | 0.989276     |
| Neonatal encephalopathy due to birth asphyxia and trauma [Global] | Male   | 0-6 days    | 1-4 years | 0.419801            | 0.618165 | 0.367825 | 0.371312  | 0.998251    | 0.993386     |
| Neonatal encephalopathy due to birth asphyxia and trauma [Global] | Female | 0-6 days    | 1-4 years | 0.440817            | 0.625125 | 0.397075 | 0.389844  | 0.998533    | 0.993545     |
| Other urinary diseases [Global]                                   | Female | 0-6 days    | 80+ years | 0.461401            | 0.797934 | 0.308214 | 0.317809  | 0.98679     | 0.980024     |
| Non-melanoma skin cancer [Data Rich]                              | Female | 15-19 years | 80+ years | 0.350231            | 0.447207 | 0.296085 | 0.303472  | 0.996521    | 0.991423     |
| Liver cancer [Global]                                             | Male   | 5-9 years   | 80+ years | 0.290082            | 0.476742 | 0.225369 | 0.221722  | 0.996852    | 0.976022     |
| Liver cancer [Data Rich]                                          | Male   | 5-9 years   | 80+ years | 0.258174            | 0.315295 | 0.211928 | 0.23142   | 0.9955      | 0.994049     |
| Liver cancer [Global]                                             | Female | 5-9 years   | 80+ years | 0.31063             | 0.451614 | 0.236595 | 0.228335  | 0.997464    | 0.982088     |
| Liver cancer [Data Rich]                                          | Female | 5-9 years   | 80+ years | 0.263012            | 0.319542 | 0.218949 | 0.24845   | 0.995481    | 0.993135     |
| Gallbladder and biliary tract cancer [Global]                     | Female | 15-19 years | 80+ years | 0.278276            | 0.430721 | 0.22467  | 0.220495  | 0.995848    | 0.978058     |
| Gallbladder and biliary tract cancer [Data Rich]                  | Female | 15-19 years | 80+ years | 0.238737            | 0.291368 | 0.200595 | 0.221274  | 0.994438    | 0.992405     |
| Gallbladder and biliary tract cancer [Data Rich]                  | Male   | 15-19 years | 80+ years | 0.222406            | 0.26676  | 0.184651 | 0.202219  | 0.996042    | 0.994092     |
| Pancreatic cancer [Global]                                        | Male   | 15-19 years | 80+ years | 0.214577            | 0.31694  | 0.166964 | 0.169107  | 0.997982    | 0.992707     |
| Pancreatic cancer [Data Rich]                                     | Male   | 15-19 years | 80+ years | 0.191774            | 0.229202 | 0.156801 | 0.160509  | 0.996913    | 0.994679     |
| Pancreatic cancer [Data Rich]                                     | Female | 15-19 years | 80+ years | 0.20446             | 0.243656 | 0.17005  | 0.177108  | 0.996902    | 0.99513      |
| Pancreatic cancer [Global]                                        | Female | 15-19 years | 80+ years | 0.223429            | 0.332292 | 0.178003 | 0.188806  | 0.998268    | 0.992794     |
| Non-melanoma skin cancer [Data Rich]                              | Male   | 15-19 years | 80+ years | 0.265502            | 0.335342 | 0.219139 | 0.228069  | 0.996862    | 0.992957     |
| Breast cancer [Data Rich]                                         | Male   | 15-19 years | 80+ years | 0.392169            | 0.472006 | 0.318287 | 0.364945  | 0.961352    | 0.95677      |
| Breast cancer [Data Rich]                                         | Female | 15-19 years | 80+ years | 0.174401            | 0.203662 | 0.142425 | 0.158337  | 0.99768     | 0.996237     |
| Uterine cancer [Data Rich]                                        | Female | 15-19 years | 80+ years | 0.258718            | 0.309653 | 0.21103  | 0.239673  | 0.997831    | 0.996836     |
| Ovarian cancer [Data Rich]                                        | Female | 15-19 years | 80+ years | 0.204563            | 0.24867  | 0.16511  | 0.17473   | 0.99654     | 0.994685     |
| Ovarian cancer [Global]                                           | Female | 15-19 years | 80+ years | 0.241635            | 0.355918 | 0.190981 | 0.18942   | 0.997766    | 0.98983      |
| Brain and nervous system cancer [Data Rich]                       | Male   | 1-4 years   | 80+ years | 0.209583            | 0.259042 | 0.174496 | 0.192362  | 0.994879    | 0.991676     |
| Brain and nervous system cancer [Data Rich]                       | Female | 1-4 years   | 80+ years | 0.209267            | 0.260436 | 0.175812 | 0.189434  | 0.99639     | 0.993864     |
| Urolithiasis [Data Rich]                                          | Male   | 5-9 years   | 80+ years | 0.42136             | 0.543893 | 0.292909 | 0.293224  | 0.988907    | 0.887035     |
| Urolithiasis [Global]                                             | Female | 5-9 years   | 80+ years | 0.636837            | 1.15705  | 0.382204 | 0.404913  | 0.916319    | 0.895508     |
| Larynx cancer [Data Rich]                                         | Male   | 15-19 years | 80+ years | 0.224619            | 0.268673 | 0.188732 | 0.213041  | 0.998271    | 0.997093     |
| Larynx cancer [Data Rich]                                         | Female | 15-19 years | 80+ years | 0.329174            | 0.399058 | 0.278224 | 0.31529   | 0.98414     | 0.983187     |
| Epilepsy [Data Rich]                                              | Female | 28-364 days | 80+ years | 0.188304            | 0.23526  | 0.148624 | 0.171069  | 0.999958    | 0.999698     |
| Other musculoskeletal disorders [Data Rich]                       | Male   | 5-9 years   | 80+ years | 0.231326            | 0.294792 | 0.168318 | 0.18166   | 0.999855    | 0.999602     |
| Other musculoskeletal disorders [Data Rich]                       | Female | 5-9 years   | 80+ years | 0.235195            | 0.339522 | 0.170989 | 0.196284  | 0.999266    | 0.998358     |
| Acute glomerulonephritis [Data Rich]                              | Male   | 28-364 days | 80+ years | 0.822721            | 1.07592  | 0.590428 | 0.610626  | 0.849045    | 0.84292      |
| Acute glomerulonephritis [Global]                                 | Male   | 28-364 days | 80+ years | 0.875901            | 1.55662  | 0.637618 | 0.66549   | 0.869347    | 0.810993     |
| Gallbladder and biliary tract cancer [Global]                     | Male   | 15-19 years | 80+ years | 0.267968            | 0.401503 | 0.213534 | 0.207024  | 0.997764    | 0.988182     |
| Larynx cancer [Global]                                            | Male   | 15-19 years | 80+ years | 0.303352            | 0.455785 | 0.240214 | 0.243127  | 0.998699    | 0.986616     |
| Larynx cancer [Global]                                            | Female | 15-19 years | 80+ years | 0.402518            | 0.615279 | 0.321927 | 0.331513  | 0.989312    | 0.983366     |
| Non-melanoma skin cancer [Global]                                 | Female | 15-19 years | 80+ years | 0.532321            | 0.686865 | 0.448283 | 0.440105  | 0.99093     | 0.979477     |
| Non-melanoma skin cancer [Global]                                 | Male   | 15-19 years | 80+ years | 0.36644             | 0.494445 | 0.297165 | 0.298866  | 0.997408    | 0.989267     |
| Rheumatic heart disease [Global]                                  | Male   | 1-4 years   | 80+ years | 0.20831             | 0.449328 | 0.138955 | 0.145013  | 0.999067    | 0.982077     |
| Rheumatic heart disease [Global]                                  | Female | 1-4 years   | 80+ years | 0.225209            | 0.478289 | 0.153975 | 0.155001  | 0.999099    | 0.979783     |
| Breast cancer [Global]                                            | Male   | 15-19 years | 80+ years | 0.503985            | 0.724397 | 0.39972  | 0.409287  | 0.959088    | 0.952042     |
| Breast cancer [Global]                                            | Female | 15-19 years | 80+ years | 0.197399            | 0.28708  | 0.154618 | 0.156554  | 0.998474    | 0.987978     |
| Uterine cancer [Global]                                           | Female | 15-19 years | 80+ years | 0.337756            | 0.489442 | 0.265703 | 0.276647  | 0.998676    | 0.989682     |
| Epilepsy [Data Rich]                                              | Male   | 28-364 days | 80+ years | 0.175537            | 0.218203 | 0.137103 | 0.155969  | 0.999891    | 0.99944      |
| Brain and nervous system cancer [Global]                          | Female | 1-4 years   | 80+ years | 0.258146            | 0.366432 | 0.204082 | 0.20635   | 0.998287    | 0.992424     |
| Brain and nervous system cancer [Global]                          | Male   | 1-4 years   | 80+ years | 0.277284            | 0.359934 | 0.20194  | 0.198461  | 0.997279    | 0.990957     |
| Non-Hodgkin lymphoma [Global]                                     | Male   | 28-364 days | 80+ years | 0.28056             | 0.391563 | 0.207353 | 0.210342  | 0.999161    | 0.991927     |
| Leukemia [Global]                                                 | Male   | 28-364 days | 80+ years | 0.296249            | 0.39042  | 0.255909 | 0.258479  | 0.997943    | 0.990752     |
| Chronic respiratory diseases [Global]                             | Male   | 0-6 days    | 80+ years | 0.295672            | 0.53992  | 0.253584 | 0.261745  | 0.996574    | 0.980577     |
| Endocrine, metabolic, blood, and immune disorders [Global]        | Male   | 0-6 days    | 80+ years | 0.26449             | 0.499392 | 0.178086 | 0.18813   | 0.998653    | 0.980418     |
| Tetanus [Global]                                                  | Male   | 1-4 years   | 80+ years | 0.705943            | 1.25464  | 0.459249 | 0.472194  | 0.91302     | 0.895396     |
| Urolithiasis [Data Rich]                                          | Female | 5-9 years   | 80+ years | 0.442466            | 0.655227 | 0.328163 | 0.420879  | 0.899323    | 0.899758     |
| Other congenital anomalies [Data Rich]                            | Female | 0-6 days    | 80+ years | 0.217836            | 0.36899  | 0.159721 | 0.191762  | 0.999513    | 0.998887     |
| Other urinary diseases [Data Rich]                                | Female | 0-6 days    | 80+ years | 0.292608            | 0.458339 | 0.197808 | 0.187394  | 0.986596    | 0.985275     |
| Endocrine, metabolic, blood, and immune disorders [Global]        | Female | 0-6 days    | 80+ years | 0.258226            | 0.461869 | 0.174068 | 0.179602  | 0.999295    | 0.987311     |
| Tetanus [Global]                                                  | Female | 1-4 years   | 80+ years | 0.856993            | 1.64741  | 0.618678 | 0.655857  | 0.847954    | 0.823808     |



**Appendix Table 11: CODEm predictive validity results by cause, sex, age, and location**

| Cause                                                                | Sex    | Age start   | Age end     | Predictive validity |          |           |           |             |              |
|----------------------------------------------------------------------|--------|-------------|-------------|---------------------|----------|-----------|-----------|-------------|--------------|
|                                                                      |        |             |             | RMSE in             | RMSE out | Trend in  | Trend out | Coverage in | Coverage out |
| Other urinary diseases [Global]                                      | Male   | 0-6 days    | 80+ years   | 0.428578            | 0.689687 | 0.248937  | 0.261553  | 0.991368    | 0.987624     |
| Other urinary diseases [Data Rich]                                   | Male   | 0-6 days    | 80+ years   | 0.242164            | 0.382149 | 0.159439  | 0.182024  | 0.990852    | 0.989955     |
| Acute glomerulonephritis [Data Rich]                                 | Female | 28-364 days | 80+ years   | 0.844377            | 1.09459  | 0.641913  | 0.681432  | 0.850557    | 0.843456     |
| Acute glomerulonephritis [Global]                                    | Female | 28-364 days | 80+ years   | 0.958925            | 1.72173  | 0.668908  | 0.716961  | 0.874865    | 0.813605     |
| Tetanus [Global]                                                     | Male   | 0-6 days    | 28-364 days | 0.504263            | 0.880319 | 0.374387  | 0.374379  | 0.994881    | 0.977627     |
| Tetanus [Global]                                                     | Female | 0-6 days    | 28-364 days | 0.526891            | 0.888634 | 0.413795  | 0.425975  | 0.992174    | 0.983909     |
| Leukemia [Data Rich]                                                 | Male   | 28-364 days | 80+ years   | 0.228271            | 0.269915 | 0.193251  | 0.219447  | 0.99711     | 0.994521     |
| Leukemia [Global]                                                    | Female | 28-364 days | 80+ years   | 0.301008            | 0.385321 | 0.256331  | 0.252217  | 0.998254    | 0.992683     |
| Leukemia [Data Rich]                                                 | Female | 28-364 days | 80+ years   | 0.218963            | 0.260716 | 0.184439  | 0.209557  | 0.997746    | 0.995751     |
| Asthma [Global]                                                      | Male   | 1-4 years   | 80+ years   | 0.249964            | 0.549165 | 0.185781  | 0.185203  | 0.99935     | 0.983294     |
| Asthma [Global]                                                      | Female | 1-4 years   | 80+ years   | 0.243613            | 0.4898   | 0.174765  | 0.179116  | 0.999551    | 0.988788     |
| Endocrine, metabolic, blood, and immune disorders [Data Rich]        | Male   | 0-6 days    | 80+ years   | 0.207104            | 0.256623 | 0.154659  | 0.177137  | 0.999324    | 0.997709     |
| Endocrine, metabolic, blood, and immune disorders [Data Rich]        | Female | 0-6 days    | 80+ years   | 0.20465             | 0.253625 | 0.155399  | 0.175053  | 0.999579    | 0.998314     |
| Endocarditis [Global]                                                | Male   | 0-6 days    | 80+ years   | 0.304961            | 0.501951 | 0.165243  | 0.17317   | 0.999702    | 0.992563     |
| Endocarditis [Global]                                                | Female | 0-6 days    | 80+ years   | 0.280473            | 0.513765 | 0.155737  | 0.163437  | 0.999718    | 0.990103     |
| Chronic respiratory diseases [Global]                                | Female | 0-6 days    | 80+ years   | 0.265202            | 0.508385 | 0.202048  | 0.193623  | 0.996976    | 0.981862     |
| Chronic respiratory diseases [Data Rich]                             | Female | 0-6 days    | 80+ years   | 0.172898            | 0.215378 | 0.125891  | 0.141505  | 0.999325    | 0.998295     |
| Chronic respiratory diseases [Data Rich]                             | Male   | 0-6 days    | 80+ years   | 0.171666            | 0.212611 | 0.126038  | 0.140777  | 0.999102    | 0.99785      |
| Asthma [Data Rich]                                                   | Male   | 1-4 years   | 80+ years   | 0.20249             | 0.377089 | 0.147593  | 0.173461  | 0.999834    | 0.99963      |
| Asthma [Data Rich]                                                   | Female | 1-4 years   | 80+ years   | 0.201411            | 0.327502 | 0.151448  | 0.169342  | 0.999893    | 0.99649      |
| Neonatal sepsis and other neonatal infections [Data Rich]            | Male   | 0-6 days    | 1-4 years   | 0.528184            | 0.674495 | 0.307613  | 0.3199    | 0.997934    | 0.994946     |
| Neonatal sepsis and other neonatal infections [Data Rich]            | Female | 0-6 days    | 1-4 years   | 0.70428             | 0.87147  | 0.429272  | 0.465388  | 0.992487    | 0.98704      |
| Neonatal sepsis and other neonatal infections [Global]               | Female | 0-6 days    | 1-4 years   | 0.858853            | 1.20911  | 0.696661  | 0.679882  | 0.995571    | 0.997205     |
| Diabetes mellitus [Global]                                           | Male   | 0-6 days    | 10-14 years | 0.248942            | 0.483544 | 0.120251  | 0.125927  | 0.999263    | 0.994511     |
| Diabetes mellitus [Global]                                           | Female | 0-6 days    | 10-14 years | 0.270583            | 0.563457 | 0.132897  | 0.129902  | 0.999763    | 0.993796     |
| Diabetes mellitus [Data Rich]                                        | Male   | 0-6 days    | 10-14 years | 0.165575            | 0.219991 | 0.0995983 | 0.11732   | 0.999975    | 0.999975     |
| Diabetes mellitus [Data Rich]                                        | Female | 0-6 days    | 10-14 years | 0.181534            | 0.252258 | 0.112038  | 0.127451  | 0.999923    | 0.999855     |
| Peptic ulcer disease [Data Rich]                                     | Female | 1-4 years   | 80+ years   | 0.195855            | 0.241085 | 0.147098  | 0.168628  | 0.999444    | 0.999117     |
| Peptic ulcer disease [Data Rich]                                     | Male   | 1-4 years   | 80+ years   | 0.174201            | 0.212275 | 0.129176  | 0.143836  | 0.998484    | 0.998316     |
| Peptic ulcer disease [Global]                                        | Male   | 1-4 years   | 80+ years   | 0.252182            | 0.490374 | 0.184911  | 0.178638  | 0.996488    | 0.978121     |
| Peptic ulcer disease [Global]                                        | Female | 1-4 years   | 80+ years   | 0.259441            | 0.533905 | 0.18469   | 0.203035  | 0.998602    | 0.981457     |
| Neonatal preterm birth complications [Data Rich]                     | Female | 0-6 days    | 1-4 years   | 0.20901             | 0.360328 | 0.153207  | 0.183126  | 0.999502    | 0.998645     |
| Neonatal preterm birth complications [Data Rich]                     | Male   | 0-6 days    | 1-4 years   | 0.220755            | 0.35867  | 0.155926  | 0.185553  | 0.999627    | 0.999489     |
| Neonatal encephalopathy due to birth asphyxia and trauma [Data Rich] | Female | 0-6 days    | 1-4 years   | 0.225605            | 0.391741 | 0.16581   | 0.19873   | 0.99862     | 0.997518     |
| Sexually transmitted diseases excluding HIV [Data Rich]              | Female | 10-14 years | 80+ years   | 0.349148            | 0.426432 | 0.261537  | 0.288072  | 0.976696    | 0.97544      |
| Congenital anomalies [Data Rich]                                     | Male   | 0-6 days    | 80+ years   | 0.191558            | 0.262907 | 0.142908  | 0.158741  | 0.999684    | 0.998984     |
| Congenital anomalies [Data Rich]                                     | Female | 0-6 days    | 80+ years   | 0.186964            | 0.263646 | 0.13997   | 0.161853  | 0.999784    | 0.999402     |
| Congenital anomalies [Global]                                        | Male   | 0-6 days    | 80+ years   | 0.243644            | 0.406747 | 0.154749  | 0.159156  | 0.999333    | 0.991278     |
| Congenital anomalies [Global]                                        | Female | 0-6 days    | 80+ years   | 0.246549            | 0.383237 | 0.151914  | 0.158348  | 0.999596    | 0.994099     |
| Neonatal encephalopathy due to birth asphyxia and trauma [Data Rich] | Male   | 0-6 days    | 1-4 years   | 0.231806            | 0.414732 | 0.169311  | 0.198503  | 0.99854     | 0.997192     |
| Hemolytic disease and other neonatal jaundice [Data Rich]            | Male   | 0-6 days    | 1-4 years   | 0.742973            | 1.04125  | 0.620276  | 0.582328  | 0.980598    | 0.965655     |
| Hemolytic disease and other neonatal jaundice [Data Rich]            | Female | 0-6 days    | 1-4 years   | 0.829482            | 1.14945  | 0.706925  | 0.676703  | 0.972598    | 0.960982     |
| Other congenital anomalies [Data Rich]                               | Male   | 0-6 days    | 80+ years   | 0.23993             | 0.339576 | 0.166096  | 0.202723  | 0.999514    | 0.998939     |
| Other congenital anomalies [Global]                                  | Male   | 0-6 days    | 80+ years   | 0.270803            | 0.480195 | 0.211497  | 0.220352  | 0.999361    | 0.991571     |
| Other congenital anomalies [Global]                                  | Female | 0-6 days    | 80+ years   | 0.266134            | 0.501704 | 0.201256  | 0.206637  | 0.999359    | 0.990673     |
| Chronic kidney disease [Data Rich]                                   | Female | 28-364 days | 80+ years   | 0.185879            | 0.22742  | 0.146103  | 0.166891  | 0.999184    | 0.998129     |
| Chronic kidney disease [Global]                                      | Female | 28-364 days | 80+ years   | 0.222734            | 0.40666  | 0.158481  | 0.163582  | 0.998411    | 0.975682     |
| Chronic kidney disease [Data Rich]                                   | Male   | 28-364 days | 80+ years   | 0.180054            | 0.218044 | 0.141203  | 0.157289  | 0.999335    | 0.998454     |
| Sexually transmitted diseases excluding HIV [Data Rich]              | Male   | 10-14 years | 80+ years   | 0.553312            | 0.676139 | 0.444756  | 0.477918  | 0.990744    | 0.982198     |
| Diabetes mellitus [Global]                                           | Male   | 15-19 years | 80+ years   | 0.217538            | 0.439178 | 0.164509  | 0.157682  | 0.997353    | 0.964674     |
| Diabetes mellitus [Global]                                           | Female | 15-19 years | 80+ years   | 0.210116            | 0.430607 | 0.151106  | 0.157058  | 0.999131    | 0.969479     |
| Diabetes mellitus [Data Rich]                                        | Male   | 15-19 years | 80+ years   | 0.171769            | 0.210543 | 0.134149  | 0.154189  | 0.999434    | 0.997943     |
| Diabetes mellitus [Data Rich]                                        | Female | 15-19 years | 80+ years   | 0.173436            | 0.214459 | 0.133848  | 0.153047  | 0.999316    | 0.997948     |
| Chronic kidney disease [Global]                                      | Male   | 28-364 days | 80+ years   | 0.23198             | 0.391861 | 0.155572  | 0.156653  | 0.998288    | 0.976638     |
| Cardiovascular diseases [Global]                                     | Male   | 0-6 days    | 80+ years   | 0.169307            | 0.322962 | 0.118066  | 0.125409  | 0.998178    | 0.961493     |
| Cardiovascular diseases [Global]                                     | Female | 0-6 days    | 80+ years   | 0.171362            | 0.313795 | 0.120172  | 0.122979  | 0.998588    | 0.975545     |
| Cerebrovascular disease [Global]                                     | Male   | 0-6 days    | 80+ years   | 0.198954            | 0.378368 | 0.135884  | 0.138689  | 0.998958    | 0.973586     |
| Cerebrovascular disease [Global]                                     | Female | 0-6 days    | 80+ years   | 0.187137            | 0.382782 | 0.130865  | 0.134796  | 0.999261    | 0.979278     |
| Hemorrhagic stroke [Global]                                          | Male   | 0-6 days    | 80+ years   | 0.207991            | 0.375961 | 0.145933  | 0.152469  | 0.999247    | 0.984863     |
| Hemorrhagic stroke [Global]                                          | Female | 0-6 days    | 80+ years   | 0.204726            | 0.372164 | 0.14328   | 0.146654  | 0.999392    | 0.988202     |
| Hypertensive heart disease [Global]                                  | Male   | 28-364 days | 80+ years   | 0.261659            | 0.652723 | 0.155297  | 0.159703  | 0.958196    | 0.928237     |
| Hypertensive heart disease [Global]                                  | Female | 28-364 days | 80+ years   | 0.276519            | 0.618354 | 0.143769  | 0.145815  | 0.963531    | 0.943911     |
| Ischemic heart disease [Global]                                      | Male   | 28-364 days | 80+ years   | 0.212464            | 0.411426 | 0.136687  | 0.143346  | 0.998111    | 0.948388     |
| Ischemic heart disease [Global]                                      | Female | 28-364 days | 80+ years   | 0.208296            | 0.440276 | 0.133356  | 0.139166  | 0.997648    | 0.967468     |
| Other musculoskeletal disorders [Global]                             | Female | 5-9 years   | 80+ years   | 0.310387            | 0.571592 | 0.197649  | 0.208472  | 0.998989    | 0.979197     |
| Other musculoskeletal disorders [Global]                             | Male   | 5-9 years   | 80+ years   | 0.28484             | 0.449628 | 0.193563  | 0.191324  | 0.999534    | 0.994184     |
| Skin and subcutaneous diseases [Global]                              | Male   | 28-364 days | 80+ years   | 0.434128            | 0.773754 | 0.212619  | 0.2446    | 0.998567    | 0.976954     |
| Skin and subcutaneous diseases [Global]                              | Female | 28-364 days | 80+ years   | 0.437465            | 0.801166 | 0.212616  | 0.222822  | 0.997049    | 0.966636     |
| Skin and subcutaneous diseases [Data Rich]                           | Male   | 28-364 days | 80+ years   | 0.355402            | 0.396546 | 0.180599  | 0.187337  | 0.998774    | 0.997626     |
| Skin and subcutaneous diseases [Data Rich]                           | Female | 28-364 days | 80+ years   | 0.305836            | 0.35353  | 0.178772  | 0.190845  | 0.997527    | 0.996039     |
| Lip and oral cavity cancer [Global]                                  | Male   | 15-19 years | 80+ years   | 0.264283            | 0.424968 | 0.211032  | 0.214489  | 0.99801     | 0.987116     |
| Lip and oral cavity cancer [Data Rich]                               | Male   | 15-19 years | 80+ years   | 0.218045            | 0.25946  | 0.183235  | 0.203019  | 0.998185    | 0.996814     |
| Lip and oral cavity cancer [Global]                                  | Female | 15-19 years | 80+ years   | 0.278991            | 0.424667 | 0.226078  | 0.230394  | 0.998813    | 0.992366     |
| Lip and oral cavity cancer [Data Rich]                               | Female | 15-19 years | 80+ years   | 0.242025            | 0.287635 | 0.206022  | 0.232479  | 0.998552    | 0.997401     |
| Esophageal cancer [Global]                                           | Male   | 15-19 years | 80+ years   | 0.263924            | 0.47238  | 0.209448  | 0.215339  | 0.995995    | 0.967151     |
| Esophageal cancer [Data Rich]                                        | Male   | 15-19 years | 80+ years   | 0.216113            | 0.259867 | 0.180307  | 0.207895  | 0.997218    | 0.99528      |

Appendix Table 11: CODEm predictive validity results by cause, sex, age, and location

| Cause                                                  | Sex    | Age start   | Age end     | Predictive validity |          |           |           |             |              |
|--------------------------------------------------------|--------|-------------|-------------|---------------------|----------|-----------|-----------|-------------|--------------|
|                                                        |        |             |             | RMSE in             | RMSE out | Trend in  | Trend out | Coverage in | Coverage out |
| Esophageal cancer [Global]                             | Female | 15-19 years | 80+ years   | 0.304075            | 0.521657 | 0.239273  | 0.239344  | 0.995405    | 0.970769     |
| Esophageal cancer [Data Rich]                          | Female | 15-19 years | 80+ years   | 0.234222            | 0.28035  | 0.195052  | 0.222812  | 0.997564    | 0.996041     |
| Stomach cancer [Global]                                | Male   | 15-19 years | 80+ years   | 0.206954            | 0.378518 | 0.163647  | 0.167061  | 0.997975    | 0.97272      |
| Stomach cancer [Data Rich]                             | Male   | 15-19 years | 80+ years   | 0.173986            | 0.205468 | 0.142241  | 0.155695  | 0.997167    | 0.994945     |
| Stomach cancer [Global]                                | Female | 15-19 years | 80+ years   | 0.218389            | 0.363072 | 0.171477  | 0.169152  | 0.998307    | 0.97887      |
| Stomach cancer [Data Rich]                             | Female | 15-19 years | 80+ years   | 0.184613            | 0.21712  | 0.152694  | 0.168233  | 0.996799    | 0.994778     |
| Colon and rectum cancer [Global]                       | Male   | 15-19 years | 80+ years   | 0.231669            | 0.319018 | 0.188826  | 0.191093  | 0.995324    | 0.982704     |
| Colon and rectum cancer [Data Rich]                    | Male   | 15-19 years | 80+ years   | 0.192877            | 0.227535 | 0.161784  | 0.181199  | 0.990844    | 0.986686     |
| Colon and rectum cancer [Global]                       | Female | 15-19 years | 80+ years   | 0.231465            | 0.319431 | 0.188847  | 0.18982   | 0.995625    | 0.983714     |
| Colon and rectum cancer [Data Rich]                    | Female | 15-19 years | 80+ years   | 0.196713            | 0.232876 | 0.167012  | 0.189957  | 0.990792    | 0.986932     |
| Other neoplasms [Global]                               | Male   | 0-6 days    | 80+ years   | 0.313467            | 0.393575 | 0.250272  | 0.247976  | 0.997338    | 0.993388     |
| Other neoplasms [Data Rich]                            | Male   | 0-6 days    | 80+ years   | 0.287791            | 0.343732 | 0.24545   | 0.282339  | 0.996592    | 0.993884     |
| Other neoplasms [Global]                               | Female | 0-6 days    | 80+ years   | 0.295042            | 0.397178 | 0.243107  | 0.251892  | 0.998521    | 0.996016     |
| Other neoplasms [Data Rich]                            | Female | 0-6 days    | 80+ years   | 0.2752              | 0.328283 | 0.235062  | 0.268303  | 0.998236    | 0.996055     |
| Tuberculosis [Data Rich]                               | Male   | 28-364 days | 80+ years   | 0.211407            | 0.262429 | 0.158322  | 0.179585  | 0.997017    | 0.996574     |
| Tuberculosis [Data Rich]                               | Female | 28-364 days | 80+ years   | 0.238311            | 0.295622 | 0.18238   | 0.210855  | 0.998385    | 0.997841     |
| Other cardiovascular and circulatory diseases [Global] | Male   | 0-6 days    | 80+ years   | 0.240368            | 0.484629 | 0.153867  | 0.157924  | 0.997411    | 0.985108     |
| Other cardiovascular and circulatory diseases [Global] | Female | 0-6 days    | 80+ years   | 0.25037             | 0.487232 | 0.159746  | 0.165778  | 0.997575    | 0.990026     |
| Meningitis [Data Rich]                                 | Female | 0-6 days    | 1-4 years   | 0.209598            | 0.265216 | 0.163216  | 0.185298  | 0.999774    | 0.999384     |
| Meningitis [Data Rich]                                 | Male   | 0-6 days    | 1-4 years   | 0.21087             | 0.263655 | 0.162963  | 0.186937  | 0.99985     | 0.999186     |
| Meningitis [Data Rich]                                 | Male   | 5-9 years   | 80+ years   | 0.194416            | 0.235862 | 0.152382  | 0.171437  | 0.999598    | 0.999221     |
| Meningitis [Data Rich]                                 | Female | 5-9 years   | 80+ years   | 0.198588            | 0.241136 | 0.156496  | 0.171924  | 0.999635    | 0.999145     |
| Meningitis [Global]                                    | Female | 0-6 days    | 1-4 years   | 0.478859            | 0.659913 | 0.437851  | 0.420983  | 0.99871     | 0.995785     |
| Meningitis [Global]                                    | Male   | 0-6 days    | 1-4 years   | 0.490113            | 0.661961 | 0.451611  | 0.444092  | 0.99852     | 0.995987     |
| Meningitis [Global]                                    | Male   | 5-9 years   | 80+ years   | 0.283233            | 0.475565 | 0.199971  | 0.180462  | 0.998392    | 0.990799     |
| Meningitis [Global]                                    | Female | 5-9 years   | 80+ years   | 0.278375            | 0.471974 | 0.210727  | 0.203868  | 0.998418    | 0.991174     |
| Digestive diseases [Data Rich]                         | Female | 1-4 years   | 80+ years   | 0.159657            | 0.192775 | 0.127111  | 0.146311  | 0.999938    | 0.999667     |
| Digestive diseases [Data Rich]                         | Male   | 1-4 years   | 80+ years   | 0.15445             | 0.186012 | 0.12383   | 0.139952  | 0.999912    | 0.99955      |
| Digestive diseases [Global]                            | Male   | 1-4 years   | 80+ years   | 0.21356             | 0.332161 | 0.171533  | 0.170629  | 0.99918     | 0.983681     |
| Digestive diseases [Global]                            | Female | 1-4 years   | 80+ years   | 0.225149            | 0.336988 | 0.196922  | 0.206501  | 0.999598    | 0.986916     |
| Epilepsy [Global]                                      | Male   | 28-364 days | 80+ years   | 0.231456            | 0.457192 | 0.170253  | 0.18153   | 0.999598    | 0.988644     |
| Epilepsy [Global]                                      | Female | 28-364 days | 80+ years   | 0.251622            | 0.484595 | 0.187684  | 0.203495  | 0.999454    | 0.990392     |
| Diarrheal diseases [Global]                            | Male   | 0-6 days    | 1-4 years   | 0.629232            | 0.905192 | 0.619909  | 0.655135  | 0.984972    | 0.971925     |
| Diarrheal diseases [Global]                            | Female | 0-6 days    | 1-4 years   | 0.640011            | 0.890755 | 0.625665  | 0.65561   | 0.985942    | 0.975753     |
| Diarrheal diseases [Data Rich]                         | Male   | 0-6 days    | 1-4 years   | 0.260308            | 0.33367  | 0.189919  | 0.216302  | 0.99906     | 0.997783     |
| Lower respiratory infections [Global]                  | Male   | 5-9 years   | 80+ years   | 0.287042            | 0.449983 | 0.229126  | 0.217209  | 0.994574    | 0.970305     |
| Diarrheal diseases [Data Rich]                         | Female | 0-6 days    | 1-4 years   | 0.264922            | 0.338532 | 0.19623   | 0.219421  | 0.99951     | 0.998077     |
| Lower respiratory infections [Global]                  | Male   | 0-6 days    | 1-4 years   | 0.375726            | 0.528378 | 0.314334  | 0.332475  | 0.993932    | 0.983312     |
| Lower respiratory infections [Global]                  | Female | 0-6 days    | 1-4 years   | 0.446471            | 0.576516 | 0.39099   | 0.364012  | 0.992328    | 0.984348     |
| Lower respiratory infections [Global]                  | Female | 5-9 years   | 80+ years   | 0.311163            | 0.441977 | 0.262073  | 0.231978  | 0.993583    | 0.976055     |
| Lower respiratory infections [Data Rich]               | Male   | 0-6 days    | 1-4 years   | 0.258624            | 0.294767 | 0.192894  | 0.199509  | 0.999172    | 0.998821     |
| Lower respiratory infections [Data Rich]               | Female | 0-6 days    | 1-4 years   | 0.277992            | 0.315998 | 0.208068  | 0.228479  | 0.999169    | 0.99883      |
| Lower respiratory infections [Data Rich]               | Male   | 5-9 years   | 80+ years   | 0.202729            | 0.23538  | 0.150603  | 0.163558  | 0.998718    | 0.997362     |
| Lower respiratory infections [Data Rich]               | Female | 5-9 years   | 80+ years   | 0.203391            | 0.231352 | 0.153891  | 0.163046  | 0.999091    | 0.998197     |
| Diarrheal diseases [Global]                            | Male   | 5-9 years   | 80+ years   | 0.315516            | 0.671702 | 0.21102   | 0.220453  | 0.998837    | 0.972869     |
| Diarrheal diseases [Global]                            | Female | 5-9 years   | 80+ years   | 0.325523            | 0.660551 | 0.217348  | 0.215835  | 0.998188    | 0.979055     |
| Diarrheal diseases [Data Rich]                         | Male   | 5-9 years   | 80+ years   | 0.277202            | 0.339703 | 0.197974  | 0.200534  | 0.999626    | 0.99871      |
| Diarrheal diseases [Data Rich]                         | Female | 5-9 years   | 80+ years   | 0.251801            | 0.315704 | 0.175355  | 0.190742  | 0.999167    | 0.997921     |
| Neonatal sepsis and other neonatal infections [Global] | Male   | 0-6 days    | 1-4 years   | 0.79296             | 1.16365  | 0.678902  | 0.678757  | 0.997859    | 0.996364     |
| Cervical cancer [Global]                               | Female | 15-19 years | 80+ years   | 0.278576            | 0.410607 | 0.221742  | 0.223249  | 0.998283    | 0.985679     |
| Cervical cancer [Data Rich]                            | Female | 15-19 years | 80+ years   | 0.211751            | 0.250798 | 0.17357   | 0.191575  | 0.997483    | 0.994811     |
| Gastritis and duodenitis [Data Rich]                   | Male   | 1-4 years   | 80+ years   | 0.289875            | 0.582981 | 0.204764  | 0.212129  | 0.988561    | 0.986857     |
| Gastritis and duodenitis [Data Rich]                   | Female | 1-4 years   | 80+ years   | 0.330937            | 0.663577 | 0.236599  | 0.250947  | 0.982695    | 0.981106     |
| Gastritis and duodenitis [Global]                      | Female | 1-4 years   | 80+ years   | 0.478308            | 0.90286  | 0.302949  | 0.305291  | 0.98483     | 0.965214     |
| Gastritis and duodenitis [Global]                      | Male   | 1-4 years   | 80+ years   | 0.375868            | 0.802617 | 0.256172  | 0.258818  | 0.990084    | 0.969651     |
| Appendicitis [Data Rich]                               | Female | 1-4 years   | 80+ years   | 0.245567            | 0.30029  | 0.194247  | 0.218738  | 0.999471    | 0.99881      |
| Appendicitis [Data Rich]                               | Male   | 1-4 years   | 80+ years   | 0.224136            | 0.27277  | 0.176263  | 0.201586  | 0.999806    | 0.999199     |
| Appendicitis [Global]                                  | Male   | 1-4 years   | 80+ years   | 0.298285            | 0.529542 | 0.210927  | 0.231073  | 0.999003    | 0.990729     |
| Appendicitis [Global]                                  | Female | 1-4 years   | 80+ years   | 0.312269            | 0.501027 | 0.226371  | 0.234019  | 0.998957    | 0.991668     |
| Other digestive diseases [Data Rich]                   | Female | 1-4 years   | 80+ years   | 0.187788            | 0.271664 | 0.144124  | 0.153374  | 0.999758    | 0.999571     |
| Other digestive diseases [Data Rich]                   | Male   | 1-4 years   | 80+ years   | 0.176642            | 0.250597 | 0.135475  | 0.155106  | 1           | 0.999797     |
| Other digestive diseases [Global]                      | Male   | 1-4 years   | 80+ years   | 0.253123            | 0.39836  | 0.168002  | 0.177113  | 0.999644    | 0.994528     |
| Other digestive diseases [Global]                      | Female | 1-4 years   | 80+ years   | 0.251109            | 0.453833 | 0.180941  | 0.194624  | 0.999141    | 0.994738     |
| Hodgkin lymphoma [Global]                              | Male   | 28-364 days | 80+ years   | 0.369664            | 0.537094 | 0.27558   | 0.27732   | 0.99861     | 0.99135      |
| Hodgkin lymphoma [Global]                              | Female | 28-364 days | 80+ years   | 0.511433            | 0.710323 | 0.345017  | 0.347415  | 0.983266    | 0.976593     |
| Anorexia nervosa [Global]                              | Male   | 5-9 years   | 45-49 years | 0.676188            | 0.936886 | 0.466817  | 0.46792   | 0.991506    | 0.977399     |
| Hodgkin lymphoma [Data Rich]                           | Female | 28-364 days | 80+ years   | 0.360903            | 0.459231 | 0.295331  | 0.329001  | 0.974471    | 0.97383      |
| Anorexia nervosa [Global]                              | Female | 5-9 years   | 45-49 years | 0.689124            | 1.00558  | 0.465121  | 0.484152  | 0.992397    | 0.980226     |
| Anorexia nervosa [Data Rich]                           | Male   | 5-9 years   | 45-49 years | 0.611363            | 0.827428 | 0.451743  | 0.468925  | 0.99085     | 0.986131     |
| Anorexia nervosa [Data Rich]                           | Female | 5-9 years   | 45-49 years | 0.607575            | 0.738699 | 0.438523  | 0.418384  | 0.991989    | 0.987068     |
| Hodgkin lymphoma [Data Rich]                           | Male   | 28-364 days | 80+ years   | 0.291003            | 0.374267 | 0.239089  | 0.262947  | 0.996633    | 0.995042     |
| Encephalitis [Data Rich]                               | Female | 0-6 days    | 80+ years   | 0.238036            | 0.310555 | 0.182385  | 0.195822  | 0.999749    | 0.999318     |
| Encephalitis [Data Rich]                               | Male   | 0-6 days    | 80+ years   | 0.242173            | 0.309767 | 0.178017  | 0.197319  | 0.999871    | 0.99958      |
| Encephalitis [Global]                                  | Male   | 0-6 days    | 80+ years   | 0.294021            | 0.572937 | 0.213487  | 0.216659  | 0.999043    | 0.982793     |
| Encephalitis [Global]                                  | Female | 0-6 days    | 80+ years   | 0.314949            | 0.561877 | 0.211558  | 0.207291  | 0.999105    | 0.984247     |
| Cardiovascular diseases [Data Rich]                    | Male   | 0-6 days    | 80+ years   | 0.128789            | 0.157006 | 0.0977253 | 0.111164  | 0.999528    | 0.998792     |

**Appendix Table 11: CODEm predictive validity results by cause, sex, age, and location**

| Cause                                                     | Sex    | Age start   | Age end   | Predictive validity |          |          |           |             |              |
|-----------------------------------------------------------|--------|-------------|-----------|---------------------|----------|----------|-----------|-------------|--------------|
|                                                           |        |             |           | RMSE in             | RMSE out | Trend in | Trend out | Coverage in | Coverage out |
| Cardiovascular diseases [Data Rich]                       | Female | 0-6 days    | 80+ years | 0-13191             | 0-159791 | 0-100678 | 0-115697  | 0-999587    | 0-999022     |
| Rheumatic heart disease [Data Rich]                       | Male   | 1-4 years   | 80+ years | 0-154642            | 0-191258 | 0-116127 | 0-131276  | 0-999744    | 0-999166     |
| Rheumatic heart disease [Data Rich]                       | Female | 1-4 years   | 80+ years | 0-167888            | 0-210923 | 0-127274 | 0-145119  | 0-999717    | 0-999285     |
| Ischemic heart disease [Data Rich]                        | Male   | 28-364 days | 80+ years | 0-148811            | 0-185673 | 0-106221 | 0-123874  | 0-999568    | 0-999002     |
| Ischemic heart disease [Data Rich]                        | Female | 28-364 days | 80+ years | 0-156253            | 0-194679 | 0-112207 | 0-127082  | 0-998142    | 0-997551     |
| Cerebrovascular disease [Data Rich]                       | Male   | 0-6 days    | 80+ years | 0-148468            | 0-180354 | 0-111289 | 0-127271  | 0-999843    | 0-999328     |
| Cerebrovascular disease [Data Rich]                       | Female | 0-6 days    | 80+ years | 0-14839             | 0-179681 | 0-111404 | 0-124484  | 0-999812    | 0-999444     |
| Ischemic stroke [Data Rich]                               | Male   | 28-364 days | 80+ years | 0-162974            | 0-208628 | 0-122859 | 0-140799  | 0-999829    | 0-999542     |
| Ischemic stroke [Data Rich]                               | Female | 28-364 days | 80+ years | 0-176751            | 0-226582 | 0-138814 | 0-156014  | 0-999427    | 0-999145     |
| Hemorrhagic stroke [Data Rich]                            | Male   | 0-6 days    | 80+ years | 0-159354            | 0-206351 | 0-120562 | 0-138704  | 0-999531    | 0-998722     |
| Hemorrhagic stroke [Data Rich]                            | Female | 0-6 days    | 80+ years | 0-159895            | 0-210713 | 0-121499 | 0-136864  | 0-999653    | 0-999104     |
| Hypertensive heart disease [Data Rich]                    | Male   | 28-364 days | 80+ years | 0-20642             | 0-305453 | 0-122387 | 0-146038  | 0-940738    | 0-94004      |
| Hypertensive heart disease [Data Rich]                    | Female | 28-364 days | 80+ years | 0-18966             | 0-280052 | 0-112534 | 0-131474  | 0-947252    | 0-946682     |
| Cardiomyopathy and myocarditis [Data Rich]                | Male   | 0-6 days    | 80+ years | 0-172748            | 0-251127 | 0-12851  | 0-151246  | 0-999407    | 0-998112     |
| Cardiomyopathy and myocarditis [Data Rich]                | Female | 0-6 days    | 80+ years | 0-168162            | 0-241965 | 0-124297 | 0-143526  | 0-99929     | 0-997977     |
| Rabies [Global]                                           | Male   | 28-364 days | 80+ years | 0-847679            | 1-7383   | 0-657715 | 0-692842  | 0-985947    | 0-909435     |
| Rabies [Global]                                           | Female | 28-364 days | 80+ years | 1-03519             | 1-92995  | 0-815822 | 0-856311  | 0-983796    | 0-891839     |
| Aortic aneurysm [Data Rich]                               | Male   | 15-19 years | 80+ years | 0-154626            | 0-241811 | 0-119887 | 0-133369  | 0-999707    | 0-999376     |
| Aortic aneurysm [Data Rich]                               | Female | 15-19 years | 80+ years | 0-165558            | 0-242339 | 0-12879  | 0-139556  | 0-999684    | 0-999434     |
| Non-Hodgkin lymphoma [Data Rich]                          | Female | 28-364 days | 80+ years | 0-24593             | 0-287152 | 0-189891 | 0-211923  | 0-989826    | 0-99803      |
| Peripheral vascular disease [Data Rich]                   | Male   | 40-44 years | 80+ years | 0-274108            | 0-570584 | 0-199772 | 0-206832  | 0-996571    | 0-993439     |
| Peripheral vascular disease [Data Rich]                   | Female | 40-44 years | 80+ years | 0-283709            | 0-624997 | 0-20301  | 0-233713  | 0-994326    | 0-99139      |
| Non-Hodgkin lymphoma [Data Rich]                          | Male   | 28-364 days | 80+ years | 0-241756            | 0-279973 | 0-180896 | 0-201326  | 0-998656    | 0-997671     |
| Endocarditis [Data Rich]                                  | Male   | 0-6 days    | 80+ years | 0-18127             | 0-330453 | 0-131639 | 0-153831  | 0-99991     | 0-999673     |
| Endocarditis [Data Rich]                                  | Female | 0-6 days    | 80+ years | 0-172816            | 0-335074 | 0-125424 | 0-146561  | 0-999901    | 0-999684     |
| Other cardiovascular and circulatory diseases [Data Rich] | Male   | 0-6 days    | 80+ years | 0-167965            | 0-205341 | 0-123035 | 0-137883  | 0-998134    | 0-99649      |
| Other cardiovascular and circulatory diseases [Data Rich] | Female | 0-6 days    | 80+ years | 0-166953            | 0-207281 | 0-121027 | 0-135104  | 0-998454    | 0-996831     |
| Multiple myeloma [Global]                                 | Female | 15-19 years | 80+ years | 0-291795            | 0-437811 | 0-232924 | 0-238089  | 0-998433    | 0-994079     |
| Multiple myeloma [Global]                                 | Male   | 15-19 years | 80+ years | 0-29141             | 0-434029 | 0-233432 | 0-232682  | 0-998274    | 0-993662     |
| Acute lymphoid leukemia [Data Rich]                       | Female | 28-364 days | 80+ years | 0-224145            | 0-306577 | 0-187613 | 0-182849  | 0-999711    | 0-998635     |
| Acute lymphoid leukemia [Data Rich]                       | Male   | 28-364 days | 80+ years | 0-232432            | 0-294645 | 0-193586 | 0-165457  | 0-999559    | 0-997808     |
| Acute myeloid leukemia [Data Rich]                        | Male   | 28-364 days | 80+ years | 0-222903            | 0-297504 | 0-179173 | 0-170446  | 0-999055    | 0-997756     |
| Nutritional deficiencies [Data Rich]                      | Male   | 28-364 days | 80+ years | 0-287957            | 0-356919 | 0-224006 | 0-257262  | 0-998454    | 0-996931     |
| Nutritional deficiencies [Data Rich]                      | Female | 28-364 days | 80+ years | 0-302854            | 0-371886 | 0-234974 | 0-266771  | 0-998176    | 0-996242     |
| Nutritional deficiencies [Global]                         | Male   | 28-364 days | 80+ years | 0-446745            | 0-741584 | 0-385084 | 0-351559  | 0-997517    | 0-975916     |
| Nutritional deficiencies [Global]                         | Female | 28-364 days | 80+ years | 0-347798            | 0-679271 | 0-261051 | 0-281852  | 0-997554    | 0-979993     |
| Protein-energy malnutrition [Global]                      | Male   | 28-364 days | 1-4 years | 0-393049            | 0-829268 | 0-288978 | 0-306836  | 0-995362    | 0-967327     |
| Protein-energy malnutrition [Global]                      | Female | 28-364 days | 1-4 years | 0-359054            | 0-826946 | 0-256126 | 0-277439  | 0-995869    | 0-966732     |
| Protein-energy malnutrition [Data Rich]                   | Male   | 28-364 days | 1-4 years | 0-28764             | 0-413384 | 0-223883 | 0-236355  | 0-998012    | 0-995415     |
| Protein-energy malnutrition [Data Rich]                   | Female | 28-364 days | 1-4 years | 0-274686            | 0-410124 | 0-20662  | 0-228832  | 0-998621    | 0-995608     |
| Protein-energy malnutrition [Global]                      | Male   | 5-9 years   | 80+ years | 0-416663            | 0-877191 | 0-308952 | 0-317449  | 0-97512     | 0-951571     |
| Protein-energy malnutrition [Global]                      | Female | 5-9 years   | 80+ years | 0-41455             | 0-915499 | 0-291363 | 0-310148  | 0-972486    | 0-940543     |
| Protein-energy malnutrition [Data Rich]                   | Male   | 5-9 years   | 80+ years | 0-363626            | 0-493479 | 0-278261 | 0-290284  | 0-969737    | 0-967988     |
| Protein-energy malnutrition [Data Rich]                   | Female | 5-9 years   | 80+ years | 0-464366            | 0-557276 | 0-280241 | 0-302441  | 0-965152    | 0-963959     |
| Other pharynx cancer [Global]                             | Female | 15-19 years | 80+ years | 0-35216             | 0-539415 | 0-283676 | 0-289152  | 0-99096     | 0-984027     |
| Hepatitis [Global]                                        | Male   | 28-364 days | 80+ years | 0-389791            | 0-804471 | 0-279954 | 0-29963   | 0-998649    | 0-9654       |
| Hepatitis [Global]                                        | Female | 28-364 days | 80+ years | 0-409244            | 0-785417 | 0-297423 | 0-306438  | 0-998383    | 0-970787     |
| Hepatitis [Data Rich]                                     | Male   | 28-364 days | 80+ years | 0-345241            | 0-467759 | 0-252615 | 0-275611  | 0-999633    | 0-998343     |
| Hepatitis [Data Rich]                                     | Female | 28-364 days | 80+ years | 0-360704            | 0-479611 | 0-266419 | 0-292711  | 0-999524    | 0-997872     |
| Cirrhosis and other chronic liver diseases [Global]       | Male   | 1-4 years   | 80+ years | 0-197443            | 0-437792 | 0-13986  | 0-141803  | 0-99945     | 0-955733     |
| Cirrhosis and other chronic liver diseases [Global]       | Female | 1-4 years   | 80+ years | 0-227061            | 0-447483 | 0-147538 | 0-152808  | 0-999689    | 0-972188     |
| Cirrhosis and other chronic liver diseases [Data Rich]    | Male   | 1-4 years   | 80+ years | 0-169942            | 0-210325 | 0-127095 | 0-148426  | 0-999859    | 0-999331     |
| Cirrhosis and other chronic liver diseases [Data Rich]    | Female | 1-4 years   | 80+ years | 0-16852             | 0-206811 | 0-132009 | 0-151937  | 0-999911    | 0-999634     |
| Sexually transmitted diseases excluding HIV [Global]      | Male   | 10-14 years | 80+ years | 0-747028            | 1-25787  | 0-562003 | 0-607499  | 0-90862     | 0-90912      |
| Sexually transmitted diseases excluding HIV [Global]      | Female | 10-14 years | 80+ years | 0-533124            | 0-783629 | 0-416827 | 0-384073  | 0-982706    | 0-974463     |
| Paralytic ileus and intestinal obstruction [Data Rich]    | Female | 0-6 days    | 80+ years | 0-245266            | 0-323878 | 0-171958 | 0-202057  | 0-999431    | 0-999196     |
| Paralytic ileus and intestinal obstruction [Data Rich]    | Male   | 0-6 days    | 80+ years | 0-231533            | 0-298973 | 0-155815 | 0-170793  | 0-999945    | 0-999768     |
| Paralytic ileus and intestinal obstruction [Global]       | Male   | 0-6 days    | 80+ years | 0-275141            | 0-481517 | 0-180579 | 0-18018   | 0-999465    | 0-988245     |
| Paralytic ileus and intestinal obstruction [Global]       | Female | 0-6 days    | 80+ years | 0-317291            | 0-525888 | 0-189343 | 0-200588  | 0-999155    | 0-991053     |
| Inflammatory bowel disease [Data Rich]                    | Male   | 1-4 years   | 80+ years | 0-238707            | 0-402211 | 0-174534 | 0-200338  | 0-999768    | 0-999231     |
| Inflammatory bowel disease [Data Rich]                    | Female | 1-4 years   | 80+ years | 0-270577            | 0-455568 | 0-205051 | 0-246676  | 0-999859    | 0-997845     |
| Inflammatory bowel disease [Global]                       | Female | 1-4 years   | 80+ years | 0-331179            | 0-582828 | 0-236738 | 0-246681  | 0-998232    | 0-988306     |
| Inflammatory bowel disease [Global]                       | Male   | 1-4 years   | 80+ years | 0-314979            | 0-572279 | 0-211475 | 0-21159   | 0-999346    | 0-990028     |
| Gallbladder and biliary diseases [Data Rich]              | Female | 1-4 years   | 80+ years | 0-216154            | 0-262167 | 0-16576  | 0-179555  | 0-999345    | 0-998466     |
| Gallbladder and biliary diseases [Data Rich]              | Male   | 1-4 years   | 80+ years | 0-187988            | 0-231465 | 0-136002 | 0-151178  | 0-999815    | 0-99955      |
| Gallbladder and biliary diseases [Global]                 | Male   | 1-4 years   | 80+ years | 0-299531            | 0-506202 | 0-207202 | 0-218847  | 0-997903    | 0-987375     |
| Gallbladder and biliary diseases [Global]                 | Female | 1-4 years   | 80+ years | 0-29401             | 0-499604 | 0-215492 | 0-223702  | 0-998064    | 0-988359     |
| Pancreatitis [Data Rich]                                  | Male   | 1-4 years   | 80+ years | 0-213743            | 0-273859 | 0-152357 | 0-154195  | 0-999817    | 0-999238     |
| Pancreatitis [Data Rich]                                  | Female | 1-4 years   | 80+ years | 0-21213             | 0-264481 | 0-160885 | 0-163192  | 0-999526    | 0-999018     |
| Pancreatitis [Global]                                     | Female | 1-4 years   | 80+ years | 0-272855            | 0-48984  | 0-191205 | 0-196191  | 0-999046    | 0-990544     |
| Pancreatitis [Global]                                     | Male   | 1-4 years   | 80+ years | 0-258021            | 0-493992 | 0-176007 | 0-175723  | 0-99929     | 0-987921     |
| Self-harm [Data Rich]                                     | Male   | 10-14 years | 80+ years | 0-169493            | 0-210637 | 0-131578 | 0-157327  | 0-999122    | 0-997806     |
| Self-harm [Data Rich]                                     | Female | 10-14 years | 80+ years | 0-186507            | 0-229924 | 0-147491 | 0-168381  | 0-998981    | 0-998069     |
| Self-harm [Global]                                        | Male   | 10-14 years | 80+ years | 0-231596            | 0-530969 | 0-169919 | 0-176416  | 0-998491    | 0-967269     |
| Self-harm [Global]                                        | Female | 10-14 years | 80+ years | 0-282112            | 0-586441 | 0-189594 | 0-194433  | 0-998415    | 0-97333      |
| Vascular intestinal disorders [Data Rich]                 | Male   | 1-4 years   | 80+ years | 0-226376            | 0-297727 | 0-166524 | 0-185016  | 0-999254    | 0-998599     |

Appendix Table 11: CODEm predictive validity results by cause, sex, age, and location

| Cause                                                    | Sex    | Age start   | Age end     | Predictive validity |          |           |           |             |              |
|----------------------------------------------------------|--------|-------------|-------------|---------------------|----------|-----------|-----------|-------------|--------------|
|                                                          |        |             |             | RMSE in             | RMSE out | Trend in  | Trend out | Coverage in | Coverage out |
| Vascular intestinal disorders [Data Rich]                | Female | 1-4 years   | 80+ years   | 0.302709            | 0.437618 | 0.237126  | 0.27905   | 0.997846    | 0.996199     |
| Vascular intestinal disorders [Global]                   | Female | 1-4 years   | 80+ years   | 0.336809            | 0.622238 | 0.243898  | 0.255409  | 0.997896    | 0.97966      |
| Vascular intestinal disorders [Global]                   | Male   | 1-4 years   | 80+ years   | 0.273602            | 0.51832  | 0.185471  | 0.187851  | 0.998844    | 0.981979     |
| Other infectious diseases [Data Rich]                    | Male   | 28-364 days | 80+ years   | 0.849938            | 1.33793  | 0.68134   | 0.6654    | 0.994814    | 0.982096     |
| Other infectious diseases [Data Rich]                    | Female | 28-364 days | 80+ years   | 0.866065            | 1.38311  | 0.704459  | 0.715279  | 0.991669    | 0.981203     |
| Schizophrenia [Global]                                   | Male   | 25-29 years | 80+ years   | 0.410656            | 0.817724 | 0.298778  | 0.328747  | 0.998071    | 0.968228     |
| Schizophrenia [Global]                                   | Female | 25-29 years | 80+ years   | 0.435666            | 0.844652 | 0.324554  | 0.340493  | 0.99663     | 0.962595     |
| Bulimia nervosa [Global]                                 | Male   | 5-9 years   | 45-49 years | 1.24174             | 1.52224  | 0.778907  | 0.773927  | 0.74696     | 0.874477     |
| Bulimia nervosa [Global]                                 | Female | 5-9 years   | 45-49 years | 1.4908              | 2.06527  | 0.947039  | 0.975532  | 0.804551    | 0.880664     |
| Bulimia nervosa [Data Rich]                              | Male   | 5-9 years   | 45-49 years | 0.995135            | 1.1258   | 0.748965  | 0.613634  | 0.977221    | 0.970577     |
| Bulimia nervosa [Data Rich]                              | Female | 5-9 years   | 45-49 years | 1.2863              | 1.69218  | 0.906183  | 0.829909  | 0.980867    | 0.973485     |
| Other nutritional deficiencies [Global]                  | Male   | 28-364 days | 80+ years   | 0.39963             | 0.80588  | 0.28936   | 0.308623  | 0.971702    | 0.959621     |
| Other nutritional deficiencies [Global]                  | Female | 28-364 days | 80+ years   | 0.523603            | 0.876513 | 0.305436  | 0.312428  | 0.969894    | 0.960787     |
| Other nutritional deficiencies [Data Rich]               | Male   | 28-364 days | 80+ years   | 0.308784            | 0.525993 | 0.229308  | 0.257695  | 0.974574    | 0.972624     |
| Other nutritional deficiencies [Data Rich]               | Female | 28-364 days | 80+ years   | 0.324322            | 0.504118 | 0.242634  | 0.267201  | 0.972955    | 0.970879     |
| Tuberculosis [Global]                                    | Male   | 28-364 days | 80+ years   | 0.351171            | 0.65737  | 0.237563  | 0.244588  | 0.996165    | 0.964623     |
| Tuberculosis [Global]                                    | Female | 28-364 days | 80+ years   | 0.407543            | 0.684353 | 0.305384  | 0.285322  | 0.996038    | 0.972464     |
| Other chromosomal abnormalities [Global]                 | Male   | 0-6 days    | 80+ years   | 0.555838            | 1.23856  | 0.360116  | 0.351254  | 0.795613    | 0.811537     |
| Other chromosomal abnormalities [Global]                 | Female | 0-6 days    | 80+ years   | 0.551614            | 1.2223   | 0.368571  | 0.349653  | 0.796089    | 0.793422     |
| Poisonings [Global]                                      | Female | 0-6 days    | 80+ years   | 0.40562             | 0.695221 | 0.347477  | 0.342542  | 0.998082    | 0.981669     |
| Poisonings [Global]                                      | Male   | 0-6 days    | 80+ years   | 0.425385            | 0.668781 | 0.372386  | 0.348576  | 0.998602    | 0.980538     |
| Other exposure to mechanical forces [Data Rich]          | Male   | 0-6 days    | 80+ years   | 0.177802            | 0.23645  | 0.135374  | 0.151503  | 0.999657    | 0.999125     |
| Other exposure to mechanical forces [Global]             | Male   | 0-6 days    | 80+ years   | 0.268158            | 0.468237 | 0.165544  | 0.166591  | 0.999418    | 0.992068     |
| Other exposure to mechanical forces [Data Rich]          | Female | 0-6 days    | 80+ years   | 0.210717            | 0.27508  | 0.163324  | 0.185215  | 0.999748    | 0.999414     |
| Other exposure to mechanical forces [Global]             | Female | 0-6 days    | 80+ years   | 0.280513            | 0.504001 | 0.191167  | 0.20147   | 0.9994      | 0.994472     |
| Other transport injuries [Global]                        | Male   | 0-6 days    | 80+ years   | 0.299572            | 0.657955 | 0.204568  | 0.221147  | 0.998102    | 0.978056     |
| Other transport injuries [Global]                        | Female | 0-6 days    | 80+ years   | 0.343051            | 0.672291 | 0.24969   | 0.266889  | 0.998576    | 0.983956     |
| Fire, heat, and hot substances [Global]                  | Male   | 0-6 days    | 80+ years   | 0.297138            | 0.555057 | 0.201519  | 0.215421  | 0.996976    | 0.985349     |
| Fire, heat, and hot substances [Data Rich]               | Female | 0-6 days    | 80+ years   | 0.178866            | 0.21795  | 0.137678  | 0.152169  | 0.999587    | 0.999097     |
| Fire, heat, and hot substances [Global]                  | Female | 0-6 days    | 80+ years   | 0.329355            | 0.550967 | 0.200576  | 0.199456  | 0.996738    | 0.975327     |
| Motor vehicle road injuries [Global]                     | Male   | 0-6 days    | 80+ years   | 0.256125            | 0.413546 | 0.156501  | 0.167159  | 0.998793    | 0.982647     |
| Motor vehicle road injuries [Data Rich]                  | Female | 0-6 days    | 80+ years   | 0.2055              | 0.312268 | 0.152528  | 0.174802  | 0.999392    | 0.998927     |
| Motor vehicle road injuries [Global]                     | Female | 0-6 days    | 80+ years   | 0.248694            | 0.437119 | 0.168686  | 0.175274  | 0.999188    | 0.991423     |
| Motor vehicle road injuries [Data Rich]                  | Male   | 0-6 days    | 80+ years   | 0.194584            | 0.306149 | 0.136924  | 0.163675  | 0.999721    | 0.999274     |
| Fire, heat, and hot substances [Data Rich]               | Male   | 0-6 days    | 80+ years   | 0.179665            | 0.216958 | 0.140302  | 0.156649  | 0.99958     | 0.999183     |
| Other transport injuries [Data Rich]                     | Female | 0-6 days    | 80+ years   | 0.278647            | 0.365364 | 0.22004   | 0.26146   | 0.998686    | 0.997421     |
| Other transport injuries [Data Rich]                     | Male   | 0-6 days    | 80+ years   | 0.232459            | 0.328819 | 0.171761  | 0.200061  | 0.998751    | 0.997558     |
| Poisonings [Data Rich]                                   | Male   | 0-6 days    | 80+ years   | 0.223922            | 0.274639 | 0.164063  | 0.184121  | 0.998576    | 0.99756      |
| Poisonings [Data Rich]                                   | Female | 0-6 days    | 80+ years   | 0.203502            | 0.25589  | 0.150142  | 0.184139  | 0.998746    | 0.997905     |
| Urolithiasis [Global]                                    | Male   | 5-9 years   | 80+ years   | 0.634033            | 1.03335  | 0.363189  | 0.345785  | 0.99006     | 0.896325     |
| Other infectious diseases [Global]                       | Male   | 0-6 days    | 80+ years   | 0.436824            | 0.703696 | 0.372887  | 0.380364  | 0.998012    | 0.98788      |
| Other infectious diseases [Global]                       | Female | 0-6 days    | 80+ years   | 0.404484            | 0.666774 | 0.352461  | 0.351163  | 0.99826     | 0.987921     |
| Opioid use disorders [Data Rich]                         | Female | 15-19 years | 80+ years   | 0.249261            | 0.64034  | 0.181122  | 0.216088  | 0.999871    | 0.999433     |
| Drug use disorders [Data Rich]                           | Female | 15-19 years | 80+ years   | 0.248363            | 0.348583 | 0.185059  | 0.226215  | 0.999359    | 0.998674     |
| Drug use disorders [Data Rich]                           | Male   | 15-19 years | 80+ years   | 0.256162            | 0.374162 | 0.181443  | 0.213387  | 0.998565    | 0.996579     |
| Drug use disorders [Data Rich]                           | Male   | 0-6 days    | 7-27 days   | 0.125699            | 0.188416 | 0.0582317 | 0.0789605 | 1           | 0.999923     |
| Drug use disorders [Data Rich]                           | Female | 0-6 days    | 7-27 days   | 0.167167            | 0.291342 | 0.0571552 | 0.0867337 | 1           | 1            |
| Opioid use disorders [Data Rich]                         | Male   | 15-19 years | 80+ years   | 0.252296            | 0.664022 | 0.175473  | 0.212255  | 0.999671    | 0.998623     |
| Opioid use disorders [Data Rich]                         | Male   | 0-6 days    | 7-27 days   | 0.220885            | 0.668543 | 0.0717221 | 0.117162  | 1           | 0.999751     |
| Opioid use disorders [Data Rich]                         | Female | 0-6 days    | 7-27 days   | 0.178574            | 0.49436  | 0.0603308 | 0.0787125 | 1           | 0.999972     |
| Cocaine use disorders [Data Rich]                        | Male   | 15-19 years | 80+ years   | 0.432421            | 1.0317   | 0.297133  | 0.400751  | 0.999215    | 0.998329     |
| Cocaine use disorders [Data Rich]                        | Female | 15-19 years | 80+ years   | 0.44167             | 1.07188  | 0.33154   | 0.420939  | 0.997974    | 0.995546     |
| Amphetamine use disorders [Data Rich]                    | Male   | 15-19 years | 80+ years   | 0.666088            | 1.40622  | 0.490885  | 0.692138  | 0.997806    | 0.989087     |
| Amphetamine use disorders [Data Rich]                    | Female | 15-19 years | 80+ years   | 0.543521            | 1.28717  | 0.412366  | 0.554011  | 0.997283    | 0.993797     |
| Other drug use disorders [Data Rich]                     | Male   | 15-19 years | 80+ years   | 0.350076            | 0.73773  | 0.245166  | 0.329733  | 0.998046    | 0.996034     |
| Other drug use disorders [Data Rich]                     | Female | 15-19 years | 80+ years   | 0.276318            | 0.614065 | 0.195738  | 0.245738  | 0.999672    | 0.99895      |
| Inguinal, femoral, and abdominal hernia [Data Rich]      | Female | 1-4 years   | 80+ years   | 0.266119            | 0.378788 | 0.165046  | 0.190263  | 0.999515    | 0.998892     |
| Inguinal, femoral, and abdominal hernia [Data Rich]      | Male   | 1-4 years   | 80+ years   | 0.244194            | 0.348262 | 0.15474   | 0.16721   | 0.999432    | 0.99891      |
| Inguinal, femoral, and abdominal hernia [Global]         | Male   | 1-4 years   | 80+ years   | 0.352325            | 0.56361  | 0.195181  | 0.200477  | 0.987658    | 0.985031     |
| Inguinal, femoral, and abdominal hernia [Global]         | Female | 1-4 years   | 80+ years   | 0.405669            | 0.649066 | 0.21152   | 0.218621  | 0.965085    | 0.964823     |
| Foreign body [Global]                                    | Male   | 0-6 days    | 80+ years   | 0.247554            | 0.498481 | 0.168645  | 0.180559  | 0.99842     | 0.976161     |
| Foreign body [Global]                                    | Female | 0-6 days    | 80+ years   | 0.250739            | 0.501313 | 0.171661  | 0.175892  | 0.998777    | 0.981552     |
| Pulmonary aspiration and foreign body in airway [Global] | Female | 0-6 days    | 80+ years   | 0.28528             | 0.521315 | 0.170286  | 0.176321  | 0.999622    | 0.986722     |
| Pulmonary aspiration and foreign body in airway [Global] | Male   | 0-6 days    | 80+ years   | 0.272622            | 0.488325 | 0.167191  | 0.169241  | 0.999341    | 0.982436     |
| Hemolytic disease and other neonatal jaundice [Global]   | Female | 0-6 days    | 1-4 years   | 0.961686            | 1.41027  | 0.805645  | 0.790481  | 0.986118    | 0.970519     |
| Hemolytic disease and other neonatal jaundice [Global]   | Male   | 0-6 days    | 1-4 years   | 0.818985            | 1.32544  | 0.669326  | 0.660534  | 0.985005    | 0.943838     |
| Neonatal disorders [Global]                              | Female | 0-6 days    | 1-4 years   | 0.372323            | 0.503852 | 0.340966  | 0.318839  | 0.997492    | 0.993728     |
| Neonatal disorders [Data Rich]                           | Female | 0-6 days    | 1-4 years   | 0.182086            | 0.240292 | 0.131319  | 0.157579  | 0.998552    | 0.997739     |
| Neonatal disorders [Global]                              | Male   | 0-6 days    | 1-4 years   | 0.377325            | 0.495069 | 0.350862  | 0.332023  | 0.998148    | 0.994451     |
| Neonatal disorders [Data Rich]                           | Male   | 0-6 days    | 1-4 years   | 0.178929            | 0.236307 | 0.129316  | 0.15385   | 0.998366    | 0.99772      |
| Chronic obstructive pulmonary disease [Global]           | Female | 28-364 days | 80+ years   | 0.210367            | 0.409778 | 0.142489  | 0.143877  | 0.999719    | 0.987232     |
| Chronic obstructive pulmonary disease [Global]           | Male   | 28-364 days | 80+ years   | 0.199208            | 0.367817 | 0.144564  | 0.146433  | 0.999615    | 0.986572     |
| Tetanus [Data Rich]                                      | Male   | 1-4 years   | 80+ years   | 0.477838            | 0.626049 | 0.376792  | 0.445355  | 0.993303    | 0.988722     |
| Tetanus [Data Rich]                                      | Female | 1-4 years   | 80+ years   | 0.711927            | 0.936873 | 0.586905  | 0.759172  | 0.986539    | 0.977636     |
| Tetanus [Data Rich]                                      | Male   | 0-6 days    | 28-364 days | 0.325834            | 0.446585 | 0.230826  | 0.288571  | 0.99744     | 0.995266     |
| Tetanus [Data Rich]                                      | Female | 0-6 days    | 28-364 days | 0.325221            | 0.435176 | 0.241054  | 0.29489   | 0.995113    | 0.992831     |

**Appendix Table 11: CODEm predictive validity results by cause, sex, age, and location**

| Cause                                            | Sex    | Age start   | Age end   | Predictive validity |          |          |           |             |              |
|--------------------------------------------------|--------|-------------|-----------|---------------------|----------|----------|-----------|-------------|--------------|
|                                                  |        |             |           | RMSE in             | RMSE out | Trend in | Trend out | Coverage in | Coverage out |
| Cellulitis [Global]                              | Male   | 28-364 days | 80+ years | 0.647528            | 0.991265 | 0.327955 | 0.314785  | 0.95777     | 0.949362     |
| Cellulitis [Global]                              | Female | 28-364 days | 80+ years | 0.56462             | 0.999479 | 0.381335 | 0.3964    | 0.939903    | 0.9297       |
| Pyoderma [Global]                                | Male   | 0-6 days    | 80+ years | 0.302043            | 0.642404 | 0.186472 | 0.196764  | 0.997313    | 0.988465     |
| Pyoderma [Global]                                | Female | 0-6 days    | 80+ years | 0.320125            | 0.628437 | 0.197569 | 0.206477  | 0.993824    | 0.983398     |
| Pyoderma [Data Rich]                             | Male   | 0-6 days    | 80+ years | 0.224209            | 0.338661 | 0.152163 | 0.179769  | 0.997054    | 0.996441     |
| Pyoderma [Data Rich]                             | Female | 0-6 days    | 80+ years | 0.244354            | 0.360529 | 0.166964 | 0.195222  | 0.991924    | 0.99144      |
| Other skin and subcutaneous diseases [Global]    | Male   | 28-364 days | 80+ years | 0.49163             | 0.823367 | 0.372127 | 0.371828  | 0.949544    | 0.949265     |
| Other skin and subcutaneous diseases [Global]    | Female | 28-364 days | 80+ years | 0.508233            | 0.793385 | 0.366162 | 0.358275  | 0.939575    | 0.934646     |
| Other skin and subcutaneous diseases [Data Rich] | Male   | 28-364 days | 80+ years | 0.391667            | 0.537225 | 0.299679 | 0.303829  | 0.959256    | 0.957097     |
| Other skin and subcutaneous diseases [Data Rich] | Female | 28-364 days | 80+ years | 0.436082            | 0.528737 | 0.301994 | 0.297398  | 0.951311    | 0.948737     |
| Cellulitis [Data Rich]                           | Male   | 28-364 days | 80+ years | 0.385964            | 0.695383 | 0.257354 | 0.270248  | 0.953723    | 0.952762     |
| Cellulitis [Data Rich]                           | Female | 28-364 days | 80+ years | 0.462116            | 0.790565 | 0.328841 | 0.384048  | 0.933416    | 0.931072     |

Appendix Table 12: Comparison of GBD 2013 and GBD 2015 covariates and level of covariates in cause of death modeling

| Cause                                | Sex    | Covariate                                           | GBD 2013 |         |         | GBD 2015 |         |         |
|--------------------------------------|--------|-----------------------------------------------------|----------|---------|---------|----------|---------|---------|
|                                      |        |                                                     | Level 1  | Level 2 | Level 3 | Level 1  | Level 2 | Level 3 |
| Tuberculosis                         | Male   | Cumulative Cigarettes (5 Years)                     | X        |         |         | X        |         |         |
| Tuberculosis                         | Male   | Diabetes Fasting Plasma Glucose (mmol/L)            | X        |         |         | X        |         |         |
| Tuberculosis                         | Male   | Health System Access 2 (unitless)                   | X        |         |         | X        |         |         |
| Tuberculosis                         | Male   | Indoor Air Pollution (All Cooking Fuels)            | X        |         |         | X        |         |         |
| Tuberculosis                         | Male   | Log-transformed SEV scalar: TB                      |          |         |         | X        |         |         |
| Tuberculosis                         | Male   | Malnutrition (proportion <2SD weight for age)       | X        |         |         | X        |         |         |
| Tuberculosis                         | Male   | Smoking Prevalence                                  | X        |         |         | X        |         |         |
| Tuberculosis                         | Male   | Alcohol (litres per capita)                         |          | X       |         |          | X       |         |
| Tuberculosis                         | Male   | Diabetes Fasting Plasma Glucose (mmol/L)            | X        |         |         |          | X       |         |
| Tuberculosis                         | Male   | Health System Access 2 (unitless)                   | X        |         |         |          | X       |         |
| Tuberculosis                         | Male   | Indoor Air Pollution (All Cooking Fuels)            | X        |         |         |          | X       |         |
| Tuberculosis                         | Male   | Malnutrition (proportion <2SD weight for age)       | X        |         |         |          | X       |         |
| Tuberculosis                         | Male   | Population Density (500-1000 ppl/sqkm, proportion)  |          | X       |         |          | X       |         |
| Tuberculosis                         | Male   | Population Density (over 1000 ppl/sqkm, proportion) |          | X       |         |          | X       |         |
| Tuberculosis                         | Male   | Smoking Prevalence                                  | X        |         |         |          | X       |         |
| Tuberculosis                         | Male   | Education (years per capita)                        |          |         | X       |          |         | X       |
| Tuberculosis                         | Male   | LDI (IS per capita)                                 |          |         | X       |          |         | X       |
| Tuberculosis                         | Male   | Sociodemographic Status                             |          |         |         |          |         | X       |
| Tuberculosis                         | Female | Cumulative Cigarettes (5 Years)                     | X        |         |         | X        |         |         |
| Tuberculosis                         | Female | Diabetes Fasting Plasma Glucose (mmol/L)            | X        |         |         | X        |         |         |
| Tuberculosis                         | Female | Health System Access 2 (unitless)                   | X        |         |         | X        |         |         |
| Tuberculosis                         | Female | Indoor Air Pollution (All Cooking Fuels)            | X        |         |         | X        |         |         |
| Tuberculosis                         | Female | Log-transformed SEV scalar: TB                      |          |         |         | X        |         |         |
| Tuberculosis                         | Female | Malnutrition (proportion <2SD weight for age)       | X        |         |         | X        |         |         |
| Tuberculosis                         | Female | Smoking Prevalence                                  | X        |         |         | X        |         |         |
| Tuberculosis                         | Female | Alcohol (litres per capita)                         |          | X       |         |          | X       |         |
| Tuberculosis                         | Female | Diabetes Fasting Plasma Glucose (mmol/L)            | X        |         |         |          | X       |         |
| Tuberculosis                         | Female | Health System Access 2 (unitless)                   | X        |         |         |          | X       |         |
| Tuberculosis                         | Female | Indoor Air Pollution (All Cooking Fuels)            | X        |         |         |          | X       |         |
| Tuberculosis                         | Female | Malnutrition (proportion <2SD weight for age)       | X        |         |         |          | X       |         |
| Tuberculosis                         | Female | Population Density (500-1000 ppl/sqkm, proportion)  |          | X       |         |          | X       |         |
| Tuberculosis                         | Female | Population Density (over 1000 ppl/sqkm, proportion) |          | X       |         |          | X       |         |
| Tuberculosis                         | Female | Smoking Prevalence                                  | X        |         |         |          | X       |         |
| Tuberculosis                         | Female | Education (years per capita)                        |          |         | X       |          |         | X       |
| Tuberculosis                         | Female | LDI (IS per capita)                                 |          |         | X       |          |         | X       |
| Tuberculosis                         | Female | Sociodemographic Status                             |          |         |         |          |         | X       |
| Diarrheal diseases                   | Male   | Improved Water Source (proportion with access)      | X        |         |         | X        |         |         |
| Diarrheal diseases                   | Male   | Log-transformed SEV scalar: Diarrhea                |          |         |         | X        |         |         |
| Diarrheal diseases                   | Male   | Rotavirus coverage (proportion)                     |          |         |         | X        |         |         |
| Diarrheal diseases                   | Male   | SEV unsafe sanitation                               |          |         |         | X        |         |         |
| Diarrheal diseases                   | Male   | SEV unsafe water                                    |          |         |         | X        |         |         |
| Diarrheal diseases                   | Male   | Sanitation (proportion with access)                 | X        |         |         | X        |         |         |
| Diarrheal diseases                   | Male   | Health System Access (unitless)                     |          |         |         |          | X       |         |
| Diarrheal diseases                   | Male   | Malnutrition (proportion <2SD weight for age)       |          | X       |         |          | X       |         |
| Diarrheal diseases                   | Male   | Education (years per capita)                        |          |         | X       |          |         | X       |
| Diarrheal diseases                   | Male   | LDI (IS per capita)                                 |          |         | X       |          |         | X       |
| Diarrheal diseases                   | Male   | Latitude Under 15 (proportion)                      |          |         | X       |          |         | X       |
| Diarrheal diseases                   | Male   | Population Density (over 1000 ppl/sqkm, proportion) |          |         | X       |          |         | X       |
| Diarrheal diseases                   | Male   | Population Density (under 150 ppl/sqkm, proportion) |          |         | X       |          |         | X       |
| Diarrheal diseases                   | Male   | Sociodemographic Status                             |          |         |         |          |         | X       |
| Diarrheal diseases                   | Male   | Health System Access 2 (unitless)                   | X        |         |         |          |         |         |
| Diarrheal diseases                   | Male   | Rotavirus Vaccine Introduced (binary)               | X        |         |         |          |         |         |
| Diarrheal diseases                   | Female | Improved Water Source (proportion with access)      | X        |         |         | X        |         |         |
| Diarrheal diseases                   | Female | Log-transformed SEV scalar: Diarrhea                |          |         |         | X        |         |         |
| Diarrheal diseases                   | Female | Rotavirus coverage (proportion)                     |          |         |         | X        |         |         |
| Diarrheal diseases                   | Female | SEV unsafe sanitation                               |          |         |         | X        |         |         |
| Diarrheal diseases                   | Female | SEV unsafe water                                    |          |         |         | X        |         |         |
| Diarrheal diseases                   | Female | Sanitation (proportion with access)                 | X        |         |         | X        |         |         |
| Diarrheal diseases                   | Female | Health System Access (unitless)                     |          |         |         |          | X       |         |
| Diarrheal diseases                   | Female | Malnutrition (proportion <2SD weight for age)       |          | X       |         |          | X       |         |
| Diarrheal diseases                   | Female | Education (years per capita)                        |          |         | X       |          |         | X       |
| Diarrheal diseases                   | Female | LDI (IS per capita)                                 |          |         | X       |          |         | X       |
| Diarrheal diseases                   | Female | Latitude Under 15 (proportion)                      |          |         | X       |          |         | X       |
| Diarrheal diseases                   | Female | Population Density (over 1000 ppl/sqkm, proportion) |          |         | X       |          |         | X       |
| Diarrheal diseases                   | Female | Population Density (under 150 ppl/sqkm, proportion) |          |         | X       |          |         | X       |
| Diarrheal diseases                   | Female | Sociodemographic Status                             |          |         |         |          |         | X       |
| Diarrheal diseases                   | Female | Health System Access 2 (unitless)                   | X        |         |         |          |         |         |
| Diarrheal diseases                   | Female | Rotavirus Vaccine Introduced (binary)               | X        |         |         |          |         |         |
| Other intestinal infectious diseases | Male   | Improved Water Source (proportion with access)      |          |         |         | X        |         |         |
| Other intestinal infectious diseases | Male   | Sanitation (proportion with access)                 |          |         |         | X        |         |         |
| Other intestinal infectious diseases | Male   | Health System Access (capped)                       |          |         |         |          | X       |         |
| Other intestinal infectious diseases | Male   | LDI (IS per capita)                                 |          |         |         |          | X       |         |
| Other intestinal infectious diseases | Male   | Education (years per capita)                        |          |         |         |          |         | X       |
| Other intestinal infectious diseases | Male   | Sociodemographic Status                             |          |         |         |          |         | X       |
| Other intestinal infectious diseases | Female | Improved Water Source (proportion with access)      |          |         |         | X        |         |         |
| Other intestinal infectious diseases | Female | Sanitation (proportion with access)                 |          |         |         | X        |         |         |
| Other intestinal infectious diseases | Female | Health System Access (capped)                       |          |         |         |          | X       |         |
| Other intestinal infectious diseases | Female | LDI (IS per capita)                                 |          |         |         |          | X       |         |
| Other intestinal infectious diseases | Female | Education (years per capita)                        |          |         |         |          |         | X       |
| Other intestinal infectious diseases | Female | Sociodemographic Status                             |          |         |         |          |         | X       |
| Lower respiratory infections         | Male   | Hib3 Vaccine Coverage (proportion)                  | X        |         |         | X        |         |         |
| Lower respiratory infections         | Male   | Indoor Air Pollution (All Cooking Fuels)            | X        |         |         | X        |         |         |
| Lower respiratory infections         | Male   | Log-transformed SEV scalar: LRI                     |          |         |         | X        |         |         |
| Lower respiratory infections         | Male   | Malnutrition (proportion <2SD weight for age)       | X        |         |         | X        |         |         |

Appendix Table 12: Comparison of GBD 2013 and GBD 2015 covariates and level of covariates in cause of death modeling

|                              |        |                                                                                                            | GBD 2013 |   | GBD 2015 |   |
|------------------------------|--------|------------------------------------------------------------------------------------------------------------|----------|---|----------|---|
|                              |        |                                                                                                            |          |   |          |   |
| Lower respiratory infections | Male   | PCV3 Coverage (proportion)                                                                                 | X        |   | X        |   |
| Lower respiratory infections | Male   | Smoking Prevalence                                                                                         | X        |   | X        |   |
| Lower respiratory infections | Male   | DTP3 Coverage (proportion)                                                                                 |          | X |          | X |
| Lower respiratory infections | Male   | Health System Access 2 (unitless)                                                                          | X        |   |          | X |
| Lower respiratory infections | Male   | Education (years per capita)                                                                               |          |   | X        | X |
| Lower respiratory infections | Male   | LDI (IS per capita)                                                                                        |          |   | X        | X |
| Lower respiratory infections | Male   | Outdoor Air Pollution (PM2.5)                                                                              | X        |   |          | X |
| Lower respiratory infections | Male   | SEV unsafe sanitation                                                                                      |          |   |          | X |
| Lower respiratory infections | Male   | Sociodemographic Status                                                                                    |          |   |          | X |
| Lower respiratory infections | Male   | Elevation Over 1500m (proportion)                                                                          |          | X |          |   |
| Lower respiratory infections | Male   | Improved Water Source (proportion with access)                                                             |          | X |          |   |
| Lower respiratory infections | Male   | Population Density (over 1000 ppl/sqkm, proportion)                                                        |          |   | X        |   |
| Lower respiratory infections | Male   | Rainfall (Quintiles 4-5)                                                                                   |          | X |          |   |
| Lower respiratory infections | Male   | Sanitation (proportion with access)                                                                        |          | X |          |   |
| Lower respiratory infections | Female | Hib3 Vaccine Coverage (proportion)                                                                         | X        |   | X        |   |
| Lower respiratory infections | Female | Indoor Air Pollution (All Cooking Fuels)                                                                   | X        |   | X        |   |
| Lower respiratory infections | Female | Log-transformed SEV scalar: LRI                                                                            |          |   | X        |   |
| Lower respiratory infections | Female | Malnutrition (proportion <2SD weight for age)                                                              | X        |   | X        |   |
| Lower respiratory infections | Female | PCV3 Coverage (proportion)                                                                                 | X        |   | X        |   |
| Lower respiratory infections | Female | Smoking Prevalence                                                                                         | X        |   | X        |   |
| Lower respiratory infections | Female | DTP3 Coverage (proportion)                                                                                 |          | X |          | X |
| Lower respiratory infections | Female | Health System Access 2 (unitless)                                                                          | X        |   |          | X |
| Lower respiratory infections | Female | PCV3 Coverage (proportion)                                                                                 | X        |   |          | X |
| Lower respiratory infections | Female | Education (years per capita)                                                                               |          |   | X        | X |
| Lower respiratory infections | Female | LDI (IS per capita)                                                                                        |          |   | X        | X |
| Lower respiratory infections | Female | Outdoor Air Pollution (PM2.5)                                                                              | X        |   |          | X |
| Lower respiratory infections | Female | SEV unsafe sanitation                                                                                      |          |   |          | X |
| Lower respiratory infections | Female | Sociodemographic Status                                                                                    |          |   |          | X |
| Lower respiratory infections | Female | Elevation Over 1500m (proportion)                                                                          |          | X |          |   |
| Lower respiratory infections | Female | Improved Water Source (proportion with access)                                                             |          | X |          |   |
| Lower respiratory infections | Female | Population Density (over 1000 ppl/sqkm, proportion)                                                        |          |   | X        |   |
| Lower respiratory infections | Female | Rainfall (Quintiles 4-5)                                                                                   |          | X |          |   |
| Lower respiratory infections | Female | Sanitation (proportion with access)                                                                        |          | X |          |   |
| Otitis media                 | Male   | Health System Access 2 (unitless)                                                                          | X        |   | X        |   |
| Otitis media                 | Male   | Indoor Air Pollution (All Cooking Fuels)                                                                   | X        |   | X        |   |
| Otitis media                 | Male   | Log-transformed SEV scalar: Otitis                                                                         |          |   | X        |   |
| Otitis media                 | Male   | Malnutrition (proportion <2SD weight for age)                                                              | X        |   | X        |   |
| Otitis media                 | Male   | Outdoor Air Pollution (PM2.5)                                                                              | X        |   | X        |   |
| Otitis media                 | Male   | Smoking Prevalence                                                                                         | X        |   | X        |   |
| Otitis media                 | Male   | DTP3 Coverage (proportion)                                                                                 |          | X |          | X |
| Otitis media                 | Male   | Elevation Over 1500m (proportion)                                                                          |          | X |          | X |
| Otitis media                 | Male   | Improved Water Source (proportion with access)                                                             |          | X |          | X |
| Otitis media                 | Male   | Rainfall (Quintiles 4-5)                                                                                   |          | X |          | X |
| Otitis media                 | Male   | Sanitation (proportion with access)                                                                        |          | X |          | X |
| Otitis media                 | Male   | Education (years per capita)                                                                               |          |   | X        | X |
| Otitis media                 | Male   | LDI (IS per capita)                                                                                        |          |   | X        | X |
| Otitis media                 | Male   | Population Density (over 1000 ppl/sqkm, proportion)                                                        |          |   | X        | X |
| Otitis media                 | Male   | Sociodemographic Status                                                                                    |          |   |          | X |
| Otitis media                 | Female | Health System Access 2 (unitless)                                                                          | X        |   | X        |   |
| Otitis media                 | Female | Indoor Air Pollution (All Cooking Fuels)                                                                   | X        |   | X        |   |
| Otitis media                 | Female | Log-transformed SEV scalar: Otitis                                                                         |          |   | X        |   |
| Otitis media                 | Female | Malnutrition (proportion <2SD weight for age)                                                              | X        |   | X        |   |
| Otitis media                 | Female | Outdoor Air Pollution (PM2.5)                                                                              | X        |   | X        |   |
| Otitis media                 | Female | Smoking Prevalence                                                                                         | X        |   | X        |   |
| Otitis media                 | Female | DTP3 Coverage (proportion)                                                                                 |          | X |          | X |
| Otitis media                 | Female | Elevation Over 1500m (proportion)                                                                          |          | X |          | X |
| Otitis media                 | Female | Improved Water Source (proportion with access)                                                             |          | X |          | X |
| Otitis media                 | Female | Rainfall (Quintiles 4-5)                                                                                   |          | X |          | X |
| Otitis media                 | Female | Sanitation (proportion with access)                                                                        |          | X |          | X |
| Otitis media                 | Female | Education (years per capita)                                                                               |          |   | X        | X |
| Otitis media                 | Female | LDI (IS per capita)                                                                                        |          |   | X        | X |
| Otitis media                 | Female | Population Density (over 1000 ppl/sqkm, proportion)                                                        |          |   | X        | X |
| Otitis media                 | Female | Sociodemographic Status                                                                                    |          |   |          | X |
| Meningitis                   | Male   | meningitis belt (proportion)                                                                               |          |   | X        |   |
| Meningitis                   | Male   | Health System Access 2 (unitless)                                                                          | X        |   |          | X |
| Meningitis                   | Male   | Improved Water Source (proportion with access)                                                             |          |   | X        | X |
| Meningitis                   | Male   | Malnutrition (proportion <2SD weight for age)                                                              | X        |   |          | X |
| Meningitis                   | Male   | DTP3 Coverage (proportion)                                                                                 |          |   |          | X |
| Meningitis                   | Male   | LDI (IS per capita)                                                                                        |          |   | X        | X |
| Meningitis                   | Male   | Maternal education (years per capita)                                                                      |          |   |          | X |
| Meningitis                   | Male   | Proportion of total population covered by menafri vac initiative (meningitis meningococcal type A vaccine) |          |   |          | X |
| Meningitis                   | Male   | Sanitation (proportion with access)                                                                        |          |   | X        | X |
| Meningitis                   | Male   | Sociodemographic Status                                                                                    |          |   |          | X |
| Meningitis                   | Male   | Education (years per capita)                                                                               |          |   | X        |   |
| Meningitis                   | Male   | Meningitis Belt (binary)                                                                                   | X        |   |          |   |
| Meningitis                   | Male   | Population Density (over 1000 ppl/sqkm, proportion)                                                        |          | X |          |   |
| Meningitis                   | Female | meningitis belt (proportion)                                                                               |          |   | X        |   |
| Meningitis                   | Female | Health System Access 2 (unitless)                                                                          | X        |   |          | X |
| Meningitis                   | Female | Improved Water Source (proportion with access)                                                             |          |   | X        | X |
| Meningitis                   | Female | Malnutrition (proportion <2SD weight for age)                                                              | X        |   |          | X |
| Meningitis                   | Female | DTP3 Coverage (proportion)                                                                                 |          |   |          | X |
| Meningitis                   | Female | LDI (IS per capita)                                                                                        |          |   | X        | X |
| Meningitis                   | Female | Maternal education (years per capita)                                                                      |          |   |          | X |
| Meningitis                   | Female | Proportion of total population covered by menafri vac initiative (meningitis meningococcal type A vaccine) |          |   |          | X |



Appendix Table 12: Comparison of GBD 2013 and GBD 2015 covariates and level of covariates in cause of death modeling

|                |        |                                                     | GBD 2013 |   | GBD 2015 |   |
|----------------|--------|-----------------------------------------------------|----------|---|----------|---|
| Meningitis     | Female | Sanitation (proportion with access)                 |          | X |          | X |
| Meningitis     | Female | Sociodemographic Status                             |          |   |          | X |
| Meningitis     | Female | Education (years per capita)                        |          | X |          |   |
| Meningitis     | Female | Meningitis Belt (binary)                            | X        |   |          |   |
| Meningitis     | Female | Population Density (over 1000 ppl/sqkm, proportion) |          | X |          |   |
| Encephalitis   | Male   | Health System Access 2 (unitless)                   | X        |   | X        |   |
| Encephalitis   | Male   | Japanese encephalitis endemic area (binary)         |          |   | X        |   |
| Encephalitis   | Male   | Malnutrition (proportion <2SD weight for age)       | X        |   | X        |   |
| Encephalitis   | Male   | LDI (IS per capita)                                 |          | X | X        |   |
| Encephalitis   | Male   | Improved Water Source (proportion with access)      |          | X |          | X |
| Encephalitis   | Male   | In-Facility Delivery (proportion)                   |          |   |          | X |
| Encephalitis   | Male   | Maternal education (years per capita)               |          |   |          | X |
| Encephalitis   | Male   | Sanitation (proportion with access)                 |          | X |          | X |
| Encephalitis   | Male   | Sociodemographic Status                             |          |   |          | X |
| Encephalitis   | Male   | Education (years per capita)                        |          | X |          |   |
| Encephalitis   | Male   | Meningitis Belt (binary)                            | X        |   |          |   |
| Encephalitis   | Male   | Population Density (over 1000 ppl/sqkm, proportion) |          | X |          |   |
| Encephalitis   | Female | Health System Access 2 (unitless)                   | X        |   | X        |   |
| Encephalitis   | Female | Japanese encephalitis endemic area (binary)         |          |   | X        |   |
| Encephalitis   | Female | Malnutrition (proportion <2SD weight for age)       | X        |   | X        |   |
| Encephalitis   | Female | LDI (IS per capita)                                 |          | X | X        |   |
| Encephalitis   | Female | Improved Water Source (proportion with access)      |          | X |          | X |
| Encephalitis   | Female | In-Facility Delivery (proportion)                   |          |   |          | X |
| Encephalitis   | Female | Maternal education (years per capita)               |          |   |          | X |
| Encephalitis   | Female | Sanitation (proportion with access)                 |          | X |          | X |
| Encephalitis   | Female | Sociodemographic Status                             |          |   |          | X |
| Encephalitis   | Female | Education (years per capita)                        |          | X |          |   |
| Encephalitis   | Female | Meningitis Belt (binary)                            | X        |   |          |   |
| Encephalitis   | Female | Population Density (over 1000 ppl/sqkm, proportion) |          | X |          |   |
| Tetanus        | Male   | DTP3 Coverage (proportion)                          | X        |   | X        |   |
| Tetanus        | Male   | Health System Access 2 (unitless)                   | X        |   | X        |   |
| Tetanus        | Male   | Tetanus Toxoid Coverage Smooth (proportion)         | X        |   | X        |   |
| Tetanus        | Male   | In-Facility Delivery (proportion)                   |          | X | X        |   |
| Tetanus        | Male   | Skilled Birth Attendance (proportion)               |          | X | X        |   |
| Tetanus        | Male   | Education (years per capita)                        |          | X |          | X |
| Tetanus        | Male   | LDI (IS per capita)                                 |          | X |          | X |
| Tetanus        | Male   | Sanitation (proportion with access)                 |          | X |          | X |
| Tetanus        | Male   | Sociodemographic Status                             |          |   |          | X |
| Tetanus        | Female | DTP3 Coverage (proportion)                          | X        |   | X        |   |
| Tetanus        | Female | Health System Access 2 (unitless)                   | X        |   | X        |   |
| Tetanus        | Female | In-Facility Delivery (proportion)                   |          | X | X        |   |
| Tetanus        | Female | Skilled Birth Attendance (proportion)               |          | X | X        |   |
| Tetanus        | Female | Education (years per capita)                        |          | X |          | X |
| Tetanus        | Female | LDI (IS per capita)                                 |          | X |          | X |
| Tetanus        | Female | Sanitation (proportion with access)                 |          | X |          | X |
| Tetanus        | Female | Sociodemographic Status                             |          |   |          | X |
| Malaria        | Male   | Health System Access (capped)                       | X        |   | X        |   |
| Malaria        | Male   | ITN Coverage (proportion)                           | X        |   | X        |   |
| Malaria        | Male   | Interaction of malaria ITN and log PFPR covariates  | X        |   | X        |   |
| Malaria        | Male   | Malaria Endemicity (40-100%)                        | X        |   | X        |   |
| Malaria        | Male   | Malaria Endemicity (5-100%)                         | X        |   | X        |   |
| Malaria        | Male   | Malaria Indoor Residual Spraying Coverage           | X        |   | X        |   |
| Malaria        | Male   | Malaria Lysenko PFPR (2 Highest Endemicity)         | X        |   | X        |   |
| Malaria        | Male   | Malaria Lysenko PFPR (3 Highest Endemicity)         | X        |   | X        |   |
| Malaria        | Male   | Malaria PFPR (rate)                                 | X        |   | X        |   |
| Malaria        | Male   | Malaria Population-At-Risk (proportion)             | X        |   | X        |   |
| Malaria        | Male   | Malaria Prevalence-Weighted Resistance              | X        |   | X        |   |
| Malaria        | Male   | Rainfall (Quintiles 2-5)                            | X        |   | X        |   |
| Malaria        | Male   | Rainfall (Quintiles 3-5)                            | X        |   | X        |   |
| Malaria        | Male   | Rainfall (Quintiles 4-5)                            | X        |   | X        |   |
| Malaria        | Male   | Education (years per capita)                        |          | X |          | X |
| Malaria        | Male   | LDI (IS per capita)                                 |          | X |          | X |
| Malaria        | Female | Health System Access (capped)                       | X        |   | X        |   |
| Malaria        | Female | ITN Coverage (proportion)                           | X        |   | X        |   |
| Malaria        | Female | Interaction of malaria ITN and log PFPR covariates  | X        |   | X        |   |
| Malaria        | Female | Malaria Endemicity (40-100%)                        | X        |   | X        |   |
| Malaria        | Female | Malaria Endemicity (5-100%)                         | X        |   | X        |   |
| Malaria        | Female | Malaria Indoor Residual Spraying Coverage           | X        |   | X        |   |
| Malaria        | Female | Malaria Lysenko PFPR (2 Highest Endemicity)         | X        |   | X        |   |
| Malaria        | Female | Malaria Lysenko PFPR (3 Highest Endemicity)         | X        |   | X        |   |
| Malaria        | Female | Malaria PFPR (rate)                                 | X        |   | X        |   |
| Malaria        | Female | Malaria Population-At-Risk (proportion)             | X        |   | X        |   |
| Malaria        | Female | Malaria Prevalence-Weighted Resistance              | X        |   | X        |   |
| Malaria        | Female | Rainfall (Quintiles 2-5)                            | X        |   | X        |   |
| Malaria        | Female | Rainfall (Quintiles 3-5)                            | X        |   | X        |   |
| Malaria        | Female | Rainfall (Quintiles 4-5)                            | X        |   | X        |   |
| Malaria        | Female | Education (years per capita)                        |          | X |          | X |
| Malaria        | Female | LDI (IS per capita)                                 |          | X |          | X |
| Chagas disease | Male   | Chagas Population-at-Risk 2 (proportion)            | X        |   | X        |   |
| Chagas disease | Male   | Health System Access (unitless)                     | X        |   | X        |   |
| Chagas disease | Male   | chagasPrevPAHO                                      |          |   | X        |   |
| Chagas disease | Male   | Sanitation (proportion with access)                 |          | X | X        |   |
| Chagas disease | Male   | Education (years per capita)                        |          | X |          | X |
| Chagas disease | Male   | LDI (IS per capita)                                 |          | X |          | X |



Appendix Table 12: Comparison of GBD 2013 and GBD 2015 covariates and level of covariates in cause of death modeling

|                                      |        |                                                              | GBD 2013 |   |   | GBD 2015 |   |   |
|--------------------------------------|--------|--------------------------------------------------------------|----------|---|---|----------|---|---|
|                                      |        |                                                              |          |   |   |          |   |   |
| Chagas disease                       | Female | Chagas Population-at-Risk 2 (proportion)                     | X        |   |   | X        |   |   |
| Chagas disease                       | Female | Health System Access (unitless)                              | X        |   |   | X        |   |   |
| Chagas disease                       | Female | chagasPrevPAHO                                               |          |   |   | X        |   |   |
| Chagas disease                       | Female | Sanitation (proportion with access)                          |          | X |   |          | X |   |
| Chagas disease                       | Female | Education (years per capita)                                 |          |   | X |          |   | X |
| Chagas disease                       | Female | LDI (IS per capita)                                          |          |   | X |          |   | X |
| Dengue                               | Male   | Population Density (over 1000 ppl/sqkm, proportion)          | X        |   |   | X        |   |   |
| Dengue                               | Male   | Population weighted probability of dengue transmission       | X        |   |   | X        |   |   |
| Dengue                               | Male   | Dengue anomalies (deviation from mean dengue incidence rate) |          | X |   |          | X |   |
| Dengue                               | Male   | Dengue outbreaks (binary)                                    |          | X |   |          | X |   |
| Dengue                               | Male   | Elevation Under 100m (proportion)                            |          | X |   |          | X |   |
| Dengue                               | Male   | Health System Access (unitless)                              |          | X |   |          | X |   |
| Dengue                               | Male   | Latitude Under 15 (proportion)                               |          | X |   |          | X |   |
| Dengue                               | Male   | Rainfall Quintile 4 (proportion)                             |          | X |   |          | X |   |
| Dengue                               | Male   | Rainfall Quintile 5 (proportion)                             |          | X |   |          | X |   |
| Dengue                               | Male   | Education (years per capita)                                 |          |   | X |          |   | X |
| Dengue                               | Male   | LDI (IS per capita)                                          |          |   | X |          |   | X |
| Dengue                               | Male   | Sociodemographic Status                                      |          |   |   |          |   | X |
| Dengue                               | Female | Population Density (over 1000 ppl/sqkm, proportion)          | X        |   |   | X        |   |   |
| Dengue                               | Female | Population weighted probability of dengue transmission       | X        |   |   | X        |   |   |
| Dengue                               | Female | Dengue anomalies (deviation from mean dengue incidence rate) |          | X |   |          | X |   |
| Dengue                               | Female | Dengue outbreaks (binary)                                    |          | X |   |          | X |   |
| Dengue                               | Female | Elevation Under 100m (proportion)                            |          | X |   |          | X |   |
| Dengue                               | Female | Health System Access (unitless)                              |          | X |   |          | X |   |
| Dengue                               | Female | Latitude Under 15 (proportion)                               |          | X |   |          | X |   |
| Dengue                               | Female | Rainfall Quintile 4 (proportion)                             |          | X |   |          | X |   |
| Dengue                               | Female | Rainfall Quintile 5 (proportion)                             |          | X |   |          | X |   |
| Dengue                               | Female | Education (years per capita)                                 |          |   | X |          |   | X |
| Dengue                               | Female | LDI (IS per capita)                                          |          |   | X |          |   | X |
| Dengue                               | Female | Sociodemographic Status                                      |          |   |   |          |   | X |
| Rabies                               | Male   | Antenatal Care (4 visits) Coverage (proportion)              |          |   |   | X        |   |   |
| Rabies                               | Male   | Health System Access (unitless)                              | X        |   |   | X        |   |   |
| Rabies                               | Male   | In-Facility Delivery (proportion)                            |          |   |   | X        |   |   |
| Rabies                               | Male   | Skilled Birth Attendance (proportion)                        |          |   |   |          | X |   |
| Rabies                               | Male   | Population Density (500-1000 ppl/sqkm, proportion)           |          | X |   |          |   | X |
| Rabies                               | Male   | Population Density (under 150 ppl/sqkm, proportion)          |          |   |   |          |   | X |
| Rabies                               | Male   | Sociodemographic Status                                      |          |   |   |          |   | X |
| Rabies                               | Male   | Population Density (300-500 ppl/sqkm, proportion)            |          | X |   |          |   |   |
| Rabies                               | Male   | Population Density (over 1000 ppl/sqkm, proportion)          |          | X |   |          |   |   |
| Rabies                               | Female | Antenatal Care (4 visits) Coverage (proportion)              |          |   |   | X        |   |   |
| Rabies                               | Female | Health System Access (unitless)                              | X        |   |   | X        |   |   |
| Rabies                               | Female | In-Facility Delivery (proportion)                            |          |   |   | X        |   |   |
| Rabies                               | Female | Skilled Birth Attendance (proportion)                        |          |   |   |          | X |   |
| Rabies                               | Female | Population Density (500-1000 ppl/sqkm, proportion)           |          | X |   |          |   | X |
| Rabies                               | Female | Population Density (under 150 ppl/sqkm, proportion)          |          |   |   |          |   | X |
| Rabies                               | Female | Sociodemographic Status                                      |          |   |   |          |   | X |
| Rabies                               | Female | Population Density (300-500 ppl/sqkm, proportion)            |          | X |   |          |   |   |
| Rabies                               | Female | Population Density (over 1000 ppl/sqkm, proportion)          |          | X |   |          |   |   |
| Other neglected tropical diseases    | Male   | Health System Access 2 (unitless)                            | X        |   |   | X        |   |   |
| Other neglected tropical diseases    | Male   | Latitude Under 15 (proportion)                               | X        |   |   | X        |   |   |
| Other neglected tropical diseases    | Male   | Rainfall Quintile 5 (proportion)                             |          | X |   |          | X |   |
| Other neglected tropical diseases    | Male   | Sanitation (proportion with access)                          |          | X |   |          | X |   |
| Other neglected tropical diseases    | Male   | Education (years per capita)                                 |          |   | X |          |   | X |
| Other neglected tropical diseases    | Male   | LDI (IS per capita)                                          |          |   | X |          |   | X |
| Other neglected tropical diseases    | Male   | Sociodemographic Status                                      |          |   |   |          |   | X |
| Other neglected tropical diseases    | Female | Health System Access 2 (unitless)                            | X        |   |   | X        |   |   |
| Other neglected tropical diseases    | Female | Latitude Under 15 (proportion)                               | X        |   |   | X        |   |   |
| Other neglected tropical diseases    | Female | Rainfall Quintile 5 (proportion)                             |          | X |   |          | X |   |
| Other neglected tropical diseases    | Female | Sanitation (proportion with access)                          |          | X |   |          | X |   |
| Other neglected tropical diseases    | Female | Education (years per capita)                                 |          |   | X |          |   | X |
| Other neglected tropical diseases    | Female | LDI (IS per capita)                                          |          |   | X |          |   | X |
| Other neglected tropical diseases    | Female | Sociodemographic Status                                      |          |   |   |          |   | X |
| Neonatal disorders                   | Male   | Health System Access 2 (unitless)                            | X        |   |   | X        |   |   |
| Neonatal disorders                   | Male   | Indoor Air Pollution (All Cooking Fuels)                     | X        |   |   | X        |   |   |
| Neonatal disorders                   | Male   | Smoking Prevalence (Reproductive Age Standardised)           | X        |   |   | X        |   |   |
| Neonatal disorders                   | Male   | Education (years per capita)                                 |          | X |   |          | X |   |
| Neonatal disorders                   | Male   | In-Facility Delivery (proportion)                            |          |   |   |          | X |   |
| Neonatal disorders                   | Male   | LDI (IS per capita)                                          |          | X |   |          | X |   |
| Neonatal disorders                   | Male   | Malnutrition (proportion <2SD weight for age)                |          | X |   |          | X |   |
| Neonatal disorders                   | Male   | Sociodemographic Status                                      |          |   |   |          |   | X |
| Neonatal disorders                   | Male   | Total Fertility Rate                                         |          |   | X |          |   | X |
| Neonatal disorders                   | Male   | Skilled Birth Attendance (proportion)                        |          | X |   |          |   |   |
| Neonatal disorders                   | Female | Health System Access 2 (unitless)                            | X        |   |   | X        |   |   |
| Neonatal disorders                   | Female | Indoor Air Pollution (All Cooking Fuels)                     | X        |   |   | X        |   |   |
| Neonatal disorders                   | Female | Smoking Prevalence (Reproductive Age Standardised)           | X        |   |   | X        |   |   |
| Neonatal disorders                   | Female | Education (years per capita)                                 |          | X |   |          | X |   |
| Neonatal disorders                   | Female | In-Facility Delivery (proportion)                            |          |   |   |          | X |   |
| Neonatal disorders                   | Female | LDI (IS per capita)                                          |          | X |   |          | X |   |
| Neonatal disorders                   | Female | Malnutrition (proportion <2SD weight for age)                |          | X |   |          | X |   |
| Neonatal disorders                   | Female | Sociodemographic Status                                      |          |   |   |          |   | X |
| Neonatal disorders                   | Female | Total Fertility Rate                                         |          |   | X |          |   | X |
| Neonatal disorders                   | Female | Skilled Birth Attendance (proportion)                        |          | X |   |          |   |   |
| Neonatal preterm birth complications | Male   | Health System Access 2 (unitless)                            | X        |   |   | X        |   |   |
| Neonatal preterm birth complications | Male   | In-Facility Delivery (proportion)                            |          |   |   |          | X |   |
| Neonatal preterm birth complications | Male   | Indoor Air Pollution (All Cooking Fuels)                     | X        |   |   | X        |   |   |

Appendix Table 12: Comparison of GBD 2013 and GBD 2015 covariates and level of covariates in cause of death modeling

|                                                          |        |                                                    | GBD 2013 |   | GBD 2015 |   |
|----------------------------------------------------------|--------|----------------------------------------------------|----------|---|----------|---|
|                                                          |        |                                                    |          |   |          |   |
| Neonatal preterm birth complications                     | Male   | Smoking Prevalence (Reproductive Age Standardised) | X        |   | X        |   |
| Neonatal preterm birth complications                     | Male   | In-Facility Delivery (proportion)                  |          |   | X        |   |
| Neonatal preterm birth complications                     | Male   | Live Births 35+ (proportion)                       |          |   | X        |   |
| Neonatal preterm birth complications                     | Male   | Malnutrition (proportion <2SD weight for age)      | X        |   | X        |   |
| Neonatal preterm birth complications                     | Male   | Education (years per capita)                       |          | X |          | X |
| Neonatal preterm birth complications                     | Male   | LDI (IS per capita)                                |          | X |          | X |
| Neonatal preterm birth complications                     | Male   | Sociodemographic Status                            |          |   |          | X |
| Neonatal preterm birth complications                     | Male   | Total Fertility Rate                               |          | X |          | X |
| Neonatal preterm birth complications                     | Male   | Skilled Birth Attendance (proportion)              | X        |   |          |   |
| Neonatal preterm birth complications                     | Female | Health System Access 2 (unitless)                  | X        |   | X        |   |
| Neonatal preterm birth complications                     | Female | Indoor Air Pollution (All Cooking Fuels)           | X        |   | X        |   |
| Neonatal preterm birth complications                     | Female | Smoking Prevalence (Reproductive Age Standardised) | X        |   | X        |   |
| Neonatal preterm birth complications                     | Female | In-Facility Delivery (proportion)                  |          |   |          | X |
| Neonatal preterm birth complications                     | Female | Live Births 35+ (proportion)                       |          |   | X        |   |
| Neonatal preterm birth complications                     | Female | Malnutrition (proportion <2SD weight for age)      | X        |   | X        |   |
| Neonatal preterm birth complications                     | Female | Education (years per capita)                       |          | X |          | X |
| Neonatal preterm birth complications                     | Female | LDI (IS per capita)                                |          | X |          | X |
| Neonatal preterm birth complications                     | Female | Sociodemographic Status                            |          |   |          | X |
| Neonatal preterm birth complications                     | Female | Total Fertility Rate                               |          | X |          | X |
| Neonatal preterm birth complications                     | Female | Skilled Birth Attendance (proportion)              |          | X |          |   |
| Neonatal encephalopathy due to birth asphyxia and trauma | Male   | Health System Access 2 (unitless)                  | X        |   | X        |   |
| Neonatal encephalopathy due to birth asphyxia and trauma | Male   | Indoor Air Pollution (All Cooking Fuels)           | X        |   | X        |   |
| Neonatal encephalopathy due to birth asphyxia and trauma | Male   | Smoking Prevalence (Reproductive Age Standardised) | X        |   | X        |   |
| Neonatal encephalopathy due to birth asphyxia and trauma | Male   | In-Facility Delivery (proportion)                  |          |   |          | X |
| Neonatal encephalopathy due to birth asphyxia and trauma | Male   | Malnutrition (proportion <2SD weight for age)      | X        |   | X        |   |
| Neonatal encephalopathy due to birth asphyxia and trauma | Male   | Education (years per capita)                       |          | X |          | X |
| Neonatal encephalopathy due to birth asphyxia and trauma | Male   | LDI (IS per capita)                                |          | X |          | X |
| Neonatal encephalopathy due to birth asphyxia and trauma | Male   | Sociodemographic Status                            |          |   |          | X |
| Neonatal encephalopathy due to birth asphyxia and trauma | Male   | Total Fertility Rate                               |          | X |          | X |
| Neonatal encephalopathy due to birth asphyxia and trauma | Male   | Skilled Birth Attendance (proportion)              |          | X |          |   |
| Neonatal encephalopathy due to birth asphyxia and trauma | Female | Health System Access 2 (unitless)                  | X        |   | X        |   |
| Neonatal encephalopathy due to birth asphyxia and trauma | Female | Indoor Air Pollution (All Cooking Fuels)           | X        |   | X        |   |
| Neonatal encephalopathy due to birth asphyxia and trauma | Female | Smoking Prevalence (Reproductive Age Standardised) | X        |   | X        |   |
| Neonatal encephalopathy due to birth asphyxia and trauma | Female | In-Facility Delivery (proportion)                  |          |   |          | X |
| Neonatal encephalopathy due to birth asphyxia and trauma | Female | Malnutrition (proportion <2SD weight for age)      | X        |   | X        |   |
| Neonatal encephalopathy due to birth asphyxia and trauma | Female | Education (years per capita)                       |          | X |          | X |
| Neonatal encephalopathy due to birth asphyxia and trauma | Female | LDI (IS per capita)                                |          | X |          | X |
| Neonatal encephalopathy due to birth asphyxia and trauma | Female | Sociodemographic Status                            |          |   |          | X |
| Neonatal encephalopathy due to birth asphyxia and trauma | Female | Total Fertility Rate                               |          | X |          | X |
| Neonatal encephalopathy due to birth asphyxia and trauma | Female | Skilled Birth Attendance (proportion)              |          | X |          |   |
| Neonatal sepsis and other neonatal infections            | Male   | Health System Access 2 (unitless)                  | X        |   | X        |   |
| Neonatal sepsis and other neonatal infections            | Male   | Indoor Air Pollution (All Cooking Fuels)           | X        |   | X        |   |
| Neonatal sepsis and other neonatal infections            | Male   | Smoking Prevalence (Reproductive Age Standardised) | X        |   | X        |   |
| Neonatal sepsis and other neonatal infections            | Male   | In-Facility Delivery (proportion)                  |          |   |          | X |
| Neonatal sepsis and other neonatal infections            | Male   | Malnutrition (proportion <2SD weight for age)      | X        |   | X        |   |
| Neonatal sepsis and other neonatal infections            | Male   | Education (years per capita)                       |          | X |          | X |
| Neonatal sepsis and other neonatal infections            | Male   | LDI (IS per capita)                                |          | X |          | X |
| Neonatal sepsis and other neonatal infections            | Male   | Sociodemographic Status                            |          |   |          | X |
| Neonatal sepsis and other neonatal infections            | Male   | Total Fertility Rate                               |          | X |          | X |
| Neonatal sepsis and other neonatal infections            | Male   | Skilled Birth Attendance (proportion)              |          | X |          |   |
| Neonatal sepsis and other neonatal infections            | Female | Health System Access 2 (unitless)                  | X        |   | X        |   |
| Neonatal sepsis and other neonatal infections            | Female | Indoor Air Pollution (All Cooking Fuels)           | X        |   | X        |   |
| Neonatal sepsis and other neonatal infections            | Female | Smoking Prevalence (Reproductive Age Standardised) | X        |   | X        |   |
| Neonatal sepsis and other neonatal infections            | Female | In-Facility Delivery (proportion)                  |          |   |          | X |
| Neonatal sepsis and other neonatal infections            | Female | Malnutrition (proportion <2SD weight for age)      | X        |   | X        |   |
| Neonatal sepsis and other neonatal infections            | Female | Education (years per capita)                       |          | X |          | X |
| Neonatal sepsis and other neonatal infections            | Female | LDI (IS per capita)                                |          | X |          | X |
| Neonatal sepsis and other neonatal infections            | Female | Sociodemographic Status                            |          |   |          | X |
| Neonatal sepsis and other neonatal infections            | Female | Total Fertility Rate                               |          | X |          | X |
| Neonatal sepsis and other neonatal infections            | Female | Skilled Birth Attendance (proportion)              |          | X |          |   |
| Hemolytic disease and other neonatal jaundice            | Male   | Antenatal Care (4 visits) Coverage (proportion)    | X        |   | X        |   |
| Hemolytic disease and other neonatal jaundice            | Male   | Health System Access 2 (unitless)                  | X        |   | X        |   |
| Hemolytic disease and other neonatal jaundice            | Male   | In-Facility Delivery (proportion)                  | X        |   | X        |   |
| Hemolytic disease and other neonatal jaundice            | Male   | Skilled Birth Attendance (proportion)              | X        |   | X        |   |
| Hemolytic disease and other neonatal jaundice            | Male   | Total Fertility Rate                               | X        |   | X        |   |
| Hemolytic disease and other neonatal jaundice            | Male   | Education (years per capita)                       |          | X |          | X |
| Hemolytic disease and other neonatal jaundice            | Male   | LDI (IS per capita)                                |          | X |          | X |
| Hemolytic disease and other neonatal jaundice            | Male   | Sociodemographic Status                            |          |   |          | X |
| Hemolytic disease and other neonatal jaundice            | Female | Antenatal Care (4 visits) Coverage (proportion)    | X        |   | X        |   |
| Hemolytic disease and other neonatal jaundice            | Female | Health System Access 2 (unitless)                  | X        |   | X        |   |
| Hemolytic disease and other neonatal jaundice            | Female | In-Facility Delivery (proportion)                  | X        |   | X        |   |
| Hemolytic disease and other neonatal jaundice            | Female | Skilled Birth Attendance (proportion)              | X        |   | X        |   |
| Hemolytic disease and other neonatal jaundice            | Female | Total Fertility Rate                               | X        |   | X        |   |
| Hemolytic disease and other neonatal jaundice            | Female | Education (years per capita)                       |          | X |          | X |
| Hemolytic disease and other neonatal jaundice            | Female | LDI (IS per capita)                                |          | X |          | X |
| Hemolytic disease and other neonatal jaundice            | Female | Sociodemographic Status                            |          |   |          | X |
| Other neonatal disorders                                 | Male   | Health System Access 2 (unitless)                  | X        |   | X        |   |
| Other neonatal disorders                                 | Male   | Indoor Air Pollution (All Cooking Fuels)           | X        |   | X        |   |
| Other neonatal disorders                                 | Male   | Smoking Prevalence (Reproductive Age Standardised) | X        |   | X        |   |
| Other neonatal disorders                                 | Male   | Malnutrition (proportion <2SD weight for age)      |          | X |          | X |
| Other neonatal disorders                                 | Male   | Skilled Birth Attendance (proportion)              |          | X |          | X |
| Other neonatal disorders                                 | Male   | Education (years per capita)                       |          | X |          | X |
| Other neonatal disorders                                 | Male   | LDI (IS per capita)                                |          | X |          | X |
| Other neonatal disorders                                 | Male   | Sociodemographic Status                            |          |   |          | X |
| Other neonatal disorders                                 | Male   | Total Fertility Rate                               |          | X |          | X |

Appendix Table 12: Comparison of GBD 2013 and GBD 2015 covariates and level of covariates in cause of death modeling

|                             |        |                                                    | GBD 2013 |   | GBD 2015 |   |
|-----------------------------|--------|----------------------------------------------------|----------|---|----------|---|
|                             |        |                                                    |          |   |          |   |
| Other neonatal disorders    | Female | Health System Access 2 (unitless)                  | X        |   | X        |   |
| Other neonatal disorders    | Female | Indoor Air Pollution (All Cooking Fuels)           | X        |   | X        |   |
| Other neonatal disorders    | Female | Smoking Prevalence (Reproductive Age Standardised) | X        |   | X        |   |
| Other neonatal disorders    | Female | Malnutrition (proportion <2SD weight for age)      |          | X |          | X |
| Other neonatal disorders    | Female | Skilled Birth Attendance (proportion)              |          | X |          | X |
| Other neonatal disorders    | Female | Education (years per capita)                       |          | X |          | X |
| Other neonatal disorders    | Female | LDI (IS per capita)                                |          | X |          | X |
| Other neonatal disorders    | Female | Sociodemographic Status                            |          |   |          | X |
| Other neonatal disorders    | Female | Total Fertility Rate                               |          | X |          | X |
| Nutritional deficiencies    | Male   | Age-Standardize Prevalence of Severe Anemia        | X        |   | X        |   |
| Nutritional deficiencies    | Male   | Famine (binary)                                    |          |   | X        |   |
| Nutritional deficiencies    | Male   | Health System Access 2 (unitless)                  | X        |   | X        |   |
| Nutritional deficiencies    | Male   | Malnutrition (proportion <2SD weight for age)      | X        |   | X        |   |
| Nutritional deficiencies    | Male   | Improved Water Source (proportion with access)     |          | X |          | X |
| Nutritional deficiencies    | Male   | Mortality Rate Due to War Shocks (per 1 person)    |          | X |          | X |
| Nutritional deficiencies    | Male   | Rainfall Quintile 1 (proportion)                   |          | X |          | X |
| Nutritional deficiencies    | Male   | Rainfall Quintile 2 (proportion)                   |          | X |          | X |
| Nutritional deficiencies    | Male   | Sanitation (proportion with access)                |          | X |          | X |
| Nutritional deficiencies    | Male   | Total Calories (kcal per capita)                   |          | X |          | X |
| Nutritional deficiencies    | Male   | Education (years per capita)                       |          | X |          | X |
| Nutritional deficiencies    | Male   | LDI (IS per capita)                                |          | X |          | X |
| Nutritional deficiencies    | Male   | Sociodemographic Status                            |          |   |          | X |
| Nutritional deficiencies    | Male   | Malnutrition Shock (binary)                        | X        |   |          |   |
| Nutritional deficiencies    | Female | Age-Standardize Prevalence of Severe Anemia        | X        |   | X        |   |
| Nutritional deficiencies    | Female | Famine (binary)                                    |          |   | X        |   |
| Nutritional deficiencies    | Female | Health System Access 2 (unitless)                  | X        |   | X        |   |
| Nutritional deficiencies    | Female | Malnutrition (proportion <2SD weight for age)      | X        |   | X        |   |
| Nutritional deficiencies    | Female | Improved Water Source (proportion with access)     |          | X |          | X |
| Nutritional deficiencies    | Female | Mortality Rate Due to War Shocks (per 1 person)    |          | X |          | X |
| Nutritional deficiencies    | Female | Rainfall Quintile 1 (proportion)                   |          | X |          | X |
| Nutritional deficiencies    | Female | Rainfall Quintile 2 (proportion)                   |          | X |          | X |
| Nutritional deficiencies    | Female | Sanitation (proportion with access)                |          | X |          | X |
| Nutritional deficiencies    | Female | Total Calories (kcal per capita)                   |          | X |          | X |
| Nutritional deficiencies    | Female | Education (years per capita)                       |          | X |          | X |
| Nutritional deficiencies    | Female | LDI (IS per capita)                                |          | X |          | X |
| Nutritional deficiencies    | Female | Sociodemographic Status                            |          |   |          | X |
| Nutritional deficiencies    | Female | Malnutrition Shock (binary)                        | X        |   |          |   |
| Protein-energy malnutrition | Male   | Age-Standardize Prevalence of Severe Anemia        | X        |   | X        |   |
| Protein-energy malnutrition | Male   | Famine (binary)                                    |          |   | X        |   |
| Protein-energy malnutrition | Male   | Health System Access 2 (unitless)                  | X        |   | X        |   |
| Protein-energy malnutrition | Male   | Malnutrition (proportion <2SD weight for age)      | X        |   | X        |   |
| Protein-energy malnutrition | Male   | Improved Water Source (proportion with access)     |          | X |          | X |
| Protein-energy malnutrition | Male   | Mortality Rate Due to War Shocks (per 1 person)    |          | X |          | X |
| Protein-energy malnutrition | Male   | Rainfall Quintile 1 (proportion)                   |          | X |          | X |
| Protein-energy malnutrition | Male   | Rainfall Quintile 2 (proportion)                   |          | X |          | X |
| Protein-energy malnutrition | Male   | Sanitation (proportion with access)                |          | X |          | X |
| Protein-energy malnutrition | Male   | Total Calories (kcal per capita)                   |          | X |          | X |
| Protein-energy malnutrition | Male   | Education (years per capita)                       |          | X |          | X |
| Protein-energy malnutrition | Male   | LDI (IS per capita)                                |          | X |          | X |
| Protein-energy malnutrition | Male   | Sociodemographic Status                            |          |   |          | X |
| Protein-energy malnutrition | Male   | Malnutrition Shock (binary)                        | X        |   |          |   |
| Protein-energy malnutrition | Female | Age-Standardize Prevalence of Severe Anemia        | X        |   | X        |   |
| Protein-energy malnutrition | Female | Famine (binary)                                    |          |   | X        |   |
| Protein-energy malnutrition | Female | Health System Access 2 (unitless)                  | X        |   | X        |   |
| Protein-energy malnutrition | Female | Malnutrition (proportion <2SD weight for age)      | X        |   | X        |   |
| Protein-energy malnutrition | Female | Improved Water Source (proportion with access)     |          | X |          | X |
| Protein-energy malnutrition | Female | Mortality Rate Due to War Shocks (per 1 person)    |          | X |          | X |
| Protein-energy malnutrition | Female | Rainfall Quintile 1 (proportion)                   |          | X |          | X |
| Protein-energy malnutrition | Female | Rainfall Quintile 2 (proportion)                   |          | X |          | X |
| Protein-energy malnutrition | Female | Sanitation (proportion with access)                |          | X |          | X |
| Protein-energy malnutrition | Female | Total Calories (kcal per capita)                   |          | X |          | X |
| Protein-energy malnutrition | Female | Education (years per capita)                       |          | X |          | X |
| Protein-energy malnutrition | Female | LDI (IS per capita)                                |          | X |          | X |
| Protein-energy malnutrition | Female | Sociodemographic Status                            |          |   |          | X |
| Protein-energy malnutrition | Female | Malnutrition Shock (binary)                        | X        |   |          |   |
| Iron-deficiency anemia      | Male   | Age-Standardize Prevalence of Severe Anemia        | X        |   | X        |   |
| Iron-deficiency anemia      | Male   | Health System Access 2 (unitless)                  | X        |   | X        |   |
| Iron-deficiency anemia      | Male   | Malnutrition (proportion <2SD weight for age)      | X        |   | X        |   |
| Iron-deficiency anemia      | Male   | Malnutrition Shock (binary)                        | X        |   | X        |   |
| Iron-deficiency anemia      | Male   | Improved Water Source (proportion with access)     |          | X |          | X |
| Iron-deficiency anemia      | Male   | Mortality Rate Due to War Shocks (per 1 person)    |          | X |          | X |
| Iron-deficiency anemia      | Male   | Rainfall Quintile 1 (proportion)                   |          | X |          | X |
| Iron-deficiency anemia      | Male   | Rainfall Quintile 2 (proportion)                   |          | X |          | X |
| Iron-deficiency anemia      | Male   | Sanitation (proportion with access)                |          | X |          | X |
| Iron-deficiency anemia      | Male   | Total Calories (kcal per capita)                   |          | X |          | X |
| Iron-deficiency anemia      | Male   | Education (years per capita)                       |          | X |          | X |
| Iron-deficiency anemia      | Male   | LDI (IS per capita)                                |          | X |          | X |
| Iron-deficiency anemia      | Male   | Sociodemographic Status                            |          |   |          | X |
| Iron-deficiency anemia      | Female | Age-Standardize Prevalence of Severe Anemia        | X        |   | X        |   |
| Iron-deficiency anemia      | Female | Health System Access 2 (unitless)                  | X        |   | X        |   |
| Iron-deficiency anemia      | Female | Malnutrition (proportion <2SD weight for age)      | X        |   | X        |   |
| Iron-deficiency anemia      | Female | Malnutrition Shock (binary)                        | X        |   | X        |   |
| Iron-deficiency anemia      | Female | Improved Water Source (proportion with access)     |          | X |          | X |
| Iron-deficiency anemia      | Female | Mortality Rate Due to War Shocks (per 1 person)    |          | X |          | X |
| Iron-deficiency anemia      | Female | Rainfall Quintile 1 (proportion)                   |          | X |          | X |

Appendix Table 12: Comparison of GBD 2013 and GBD 2015 covariates and level of covariates in cause of death modeling

|                                             |        |                                                 | GBD 2013 |   | GBD 2015 |   |
|---------------------------------------------|--------|-------------------------------------------------|----------|---|----------|---|
|                                             |        |                                                 |          |   |          |   |
| Iron-deficiency anemia                      | Female | Rainfall Quintile 2 (proportion)                |          | X |          | X |
| Iron-deficiency anemia                      | Female | Sanitation (proportion with access)             |          |   | X        |   |
| Iron-deficiency anemia                      | Female | Total Calories (kcal per capita)                |          | X |          | X |
| Iron-deficiency anemia                      | Female | Education (years per capita)                    |          |   | X        | X |
| Iron-deficiency anemia                      | Female | LDI (IS per capita)                             |          |   | X        | X |
| Iron-deficiency anemia                      | Female | Sociodemographic Status                         |          |   |          | X |
| Other nutritional deficiencies              | Male   | Age-Standardize Prevalence of Severe Anemia     | X        |   |          |   |
| Other nutritional deficiencies              | Male   | Famine (binary)                                 |          |   | X        |   |
| Other nutritional deficiencies              | Male   | Health System Access 2 (unitless)               | X        |   | X        |   |
| Other nutritional deficiencies              | Male   | Malnutrition (proportion <2SD weight for age)   | X        |   | X        |   |
| Other nutritional deficiencies              | Male   | Improved Water Source (proportion with access)  |          | X |          | X |
| Other nutritional deficiencies              | Male   | Mortality Rate Due to War Shocks (per 1 person) |          | X |          | X |
| Other nutritional deficiencies              | Male   | Rainfall Quintile 1 (proportion)                |          | X |          | X |
| Other nutritional deficiencies              | Male   | Rainfall Quintile 2 (proportion)                |          | X |          | X |
| Other nutritional deficiencies              | Male   | Sanitation (proportion with access)             |          | X |          | X |
| Other nutritional deficiencies              | Male   | Total Calories (kcal per capita)                |          | X |          | X |
| Other nutritional deficiencies              | Male   | Education (years per capita)                    |          |   | X        | X |
| Other nutritional deficiencies              | Male   | LDI (IS per capita)                             |          |   | X        | X |
| Other nutritional deficiencies              | Male   | Sociodemographic Status                         |          |   |          | X |
| Other nutritional deficiencies              | Male   | Malnutrition Shock (binary)                     | X        |   |          |   |
| Other nutritional deficiencies              | Female | Age-Standardize Prevalence of Severe Anemia     | X        |   | X        |   |
| Other nutritional deficiencies              | Female | Famine (binary)                                 |          |   | X        |   |
| Other nutritional deficiencies              | Female | Health System Access 2 (unitless)               | X        |   | X        |   |
| Other nutritional deficiencies              | Female | Malnutrition (proportion <2SD weight for age)   | X        |   | X        |   |
| Other nutritional deficiencies              | Female | Improved Water Source (proportion with access)  |          | X |          | X |
| Other nutritional deficiencies              | Female | Mortality Rate Due to War Shocks (per 1 person) |          | X |          | X |
| Other nutritional deficiencies              | Female | Rainfall Quintile 1 (proportion)                |          | X |          | X |
| Other nutritional deficiencies              | Female | Rainfall Quintile 2 (proportion)                |          | X |          | X |
| Other nutritional deficiencies              | Female | Sanitation (proportion with access)             |          | X |          | X |
| Other nutritional deficiencies              | Female | Total Calories (kcal per capita)                |          | X |          | X |
| Other nutritional deficiencies              | Female | Education (years per capita)                    |          |   | X        | X |
| Other nutritional deficiencies              | Female | LDI (IS per capita)                             |          |   | X        | X |
| Other nutritional deficiencies              | Female | Sociodemographic Status                         |          |   |          | X |
| Other nutritional deficiencies              | Female | Malnutrition Shock (binary)                     | X        |   |          |   |
| Sexually transmitted diseases excluding HIV | Male   | Syphilis prevalence (proportion)                | X        |   | X        |   |
| Sexually transmitted diseases excluding HIV | Male   | Age-Specific Fertility Rate                     |          |   |          | X |
| Sexually transmitted diseases excluding HIV | Male   | Education (years per capita)                    |          | X |          | X |
| Sexually transmitted diseases excluding HIV | Male   | Health System Access (capped)                   |          | X |          | X |
| Sexually transmitted diseases excluding HIV | Male   | Legality of Abortion                            |          | X |          | X |
| Sexually transmitted diseases excluding HIV | Male   | Total Fertility Rate                            |          | X |          | X |
| Sexually transmitted diseases excluding HIV | Male   | Antenatal Care (1 visit) Coverage (proportion)  |          |   | X        | X |
| Sexually transmitted diseases excluding HIV | Male   | Antenatal Care (4 visits) Coverage (proportion) |          |   | X        | X |
| Sexually transmitted diseases excluding HIV | Male   | LDI (IS per capita)                             |          |   |          | X |
| Sexually transmitted diseases excluding HIV | Female | Syphilis prevalence (proportion)                | X        |   | X        |   |
| Sexually transmitted diseases excluding HIV | Female | Age-Specific Fertility Rate                     |          |   |          | X |
| Sexually transmitted diseases excluding HIV | Female | Education (years per capita)                    |          | X |          | X |
| Sexually transmitted diseases excluding HIV | Female | Health System Access (capped)                   |          | X |          | X |
| Sexually transmitted diseases excluding HIV | Female | Legality of Abortion                            |          | X |          | X |
| Sexually transmitted diseases excluding HIV | Female | Total Fertility Rate                            |          | X |          | X |
| Sexually transmitted diseases excluding HIV | Female | Antenatal Care (1 visit) Coverage (proportion)  |          |   | X        | X |
| Sexually transmitted diseases excluding HIV | Female | Antenatal Care (4 visits) Coverage (proportion) |          |   | X        | X |
| Sexually transmitted diseases excluding HIV | Female | LDI (IS per capita)                             |          |   |          | X |
| Hepatitis                                   | Male   | Hepatitis B (HBsAg) Seroprevalence (GBD 2015)   |          |   | X        |   |
| Hepatitis                                   | Male   | Hepatitis C (IgG) Seroprevalence (GBD 2015)     |          |   | X        |   |
| Hepatitis                                   | Male   | Log-transformed SEV scalar: Hep                 |          |   | X        |   |
| Hepatitis                                   | Male   | Seroprevalence of anti-HAV (IgG)                |          |   | X        |   |
| Hepatitis                                   | Male   | Seroprevalence of anti-HEV (IgG)                |          |   | X        |   |
| Hepatitis                                   | Male   | Health System Access 2 (unitless)               |          | X |          | X |
| Hepatitis                                   | Male   | Improved Water Source (proportion with access)  |          | X |          | X |
| Hepatitis                                   | Male   | LDI (IS per capita)                             |          | X |          | X |
| Hepatitis                                   | Male   | Sanitation (proportion with access)             |          | X |          | X |
| Hepatitis                                   | Male   | Education (years per capita)                    |          |   | X        | X |
| Hepatitis                                   | Male   | Sociodemographic Status                         |          |   |          | X |
| Hepatitis                                   | Male   | Hepatitis A Prevalence (proportion)             | X        |   |          |   |
| Hepatitis                                   | Male   | Hepatitis B Prevalence (proportion)             | X        |   |          |   |
| Hepatitis                                   | Male   | Hepatitis C Prevalence (proportion)             | X        |   |          |   |
| Hepatitis                                   | Male   | Hepatitis E Prevalence (proportion)             | X        |   |          |   |
| Hepatitis                                   | Female | Hepatitis B (HBsAg) Seroprevalence (GBD 2015)   |          |   | X        |   |
| Hepatitis                                   | Female | Hepatitis C (IgG) Seroprevalence (GBD 2015)     |          |   | X        |   |
| Hepatitis                                   | Female | Log-transformed SEV scalar: Hep                 |          |   | X        |   |
| Hepatitis                                   | Female | Seroprevalence of anti-HAV (IgG)                |          |   | X        |   |
| Hepatitis                                   | Female | Seroprevalence of anti-HEV (IgG)                |          |   | X        |   |
| Hepatitis                                   | Female | Health System Access 2 (unitless)               |          | X |          | X |
| Hepatitis                                   | Female | Improved Water Source (proportion with access)  |          | X |          | X |
| Hepatitis                                   | Female | LDI (IS per capita)                             |          | X |          | X |
| Hepatitis                                   | Female | Sanitation (proportion with access)             |          | X |          | X |
| Hepatitis                                   | Female | Education (years per capita)                    |          |   | X        | X |
| Hepatitis                                   | Female | Sociodemographic Status                         |          |   |          | X |
| Hepatitis                                   | Female | Hepatitis A Prevalence (proportion)             | X        |   |          |   |
| Hepatitis                                   | Female | Hepatitis B Prevalence (proportion)             | X        |   |          |   |
| Hepatitis                                   | Female | Hepatitis C Prevalence (proportion)             | X        |   |          |   |
| Hepatitis                                   | Female | Hepatitis E Prevalence (proportion)             | X        |   |          |   |
| Other infectious diseases                   | Male   | Antenatal Care (1 visit) Coverage (proportion)  |          | X |          | X |
| Other infectious diseases                   | Male   | DTP3 Coverage (proportion)                      |          | X |          | X |
| Other infectious diseases                   | Male   | Health System Access (unitless)                 |          | X |          | X |

Appendix Table 12: Comparison of GBD 2013 and GBD 2015 covariates and level of covariates in cause of death modeling

|                            |        |                                                     | GBD 2013 |   |   | GBD 2015 |   |   |
|----------------------------|--------|-----------------------------------------------------|----------|---|---|----------|---|---|
|                            |        |                                                     |          |   |   |          |   |   |
| Other infectious diseases  | Male   | Malnutrition (proportion <2SD weight for age)       |          | X |   | X        |   |   |
| Other infectious diseases  | Male   | Measles Vaccine Coverage (proportion)               | X        |   |   | X        |   |   |
| Other infectious diseases  | Male   | Antenatal Care (1 visit) Coverage (proportion)      |          | X |   |          | X |   |
| Other infectious diseases  | Male   | Improved Water Source (proportion with access)      |          | X |   |          | X |   |
| Other infectious diseases  | Male   | Latitude 15 to 30 (proportion)                      |          | X |   |          | X |   |
| Other infectious diseases  | Male   | Latitude 30 to 45 (proportion)                      |          | X |   |          | X |   |
| Other infectious diseases  | Male   | Latitude Over 45 (proportion)                       |          | X |   |          | X |   |
| Other infectious diseases  | Male   | Latitude Under 15 (proportion)                      |          | X |   |          | X |   |
| Other infectious diseases  | Male   | Malnutrition (proportion <2SD weight for age)       |          | X |   |          | X |   |
| Other infectious diseases  | Male   | Rainfall Quintile 1 (proportion)                    |          | X |   |          | X |   |
| Other infectious diseases  | Male   | Rainfall Quintile 2 (proportion)                    |          | X |   |          | X |   |
| Other infectious diseases  | Male   | Rainfall Quintile 3 (proportion)                    |          | X |   |          | X |   |
| Other infectious diseases  | Male   | Rainfall Quintile 4 (proportion)                    |          | X |   |          | X |   |
| Other infectious diseases  | Male   | Rainfall Quintile 5 (proportion)                    |          | X |   |          | X |   |
| Other infectious diseases  | Male   | Sanitation (proportion with access)                 |          | X |   |          | X |   |
| Other infectious diseases  | Male   | DTP3 Coverage (proportion)                          | X        |   |   |          |   | X |
| Other infectious diseases  | Male   | Education (years per capita)                        |          |   | X |          |   | X |
| Other infectious diseases  | Male   | LDI (IS per capita)                                 |          |   | X |          |   | X |
| Other infectious diseases  | Male   | Latitude 15 to 30 (proportion)                      |          | X |   |          |   | X |
| Other infectious diseases  | Male   | Latitude 30 to 45 (proportion)                      |          | X |   |          |   | X |
| Other infectious diseases  | Male   | Latitude Under 15 (proportion)                      |          | X |   |          |   | X |
| Other infectious diseases  | Male   | Sociodemographic Status                             |          |   |   |          |   | X |
| Other infectious diseases  | Female | Antenatal Care (1 visit) Coverage (proportion)      |          | X |   | X        |   |   |
| Other infectious diseases  | Female | DTP3 Coverage (proportion)                          | X        |   |   | X        |   |   |
| Other infectious diseases  | Female | Health System Access (unitless)                     | X        |   |   | X        |   |   |
| Other infectious diseases  | Female | Malnutrition (proportion <2SD weight for age)       |          | X |   | X        |   |   |
| Other infectious diseases  | Female | Measles Vaccine Coverage (proportion)               | X        |   |   | X        |   |   |
| Other infectious diseases  | Female | Antenatal Care (1 visit) Coverage (proportion)      |          | X |   |          | X |   |
| Other infectious diseases  | Female | Improved Water Source (proportion with access)      |          | X |   |          | X |   |
| Other infectious diseases  | Female | Latitude 15 to 30 (proportion)                      |          | X |   |          | X |   |
| Other infectious diseases  | Female | Latitude 30 to 45 (proportion)                      |          | X |   |          | X |   |
| Other infectious diseases  | Female | Latitude Over 45 (proportion)                       |          | X |   |          | X |   |
| Other infectious diseases  | Female | Latitude Under 15 (proportion)                      |          | X |   |          | X |   |
| Other infectious diseases  | Female | Malnutrition (proportion <2SD weight for age)       |          | X |   |          | X |   |
| Other infectious diseases  | Female | Rainfall Quintile 1 (proportion)                    |          | X |   |          | X |   |
| Other infectious diseases  | Female | Rainfall Quintile 2 (proportion)                    |          | X |   |          | X |   |
| Other infectious diseases  | Female | Rainfall Quintile 3 (proportion)                    |          | X |   |          | X |   |
| Other infectious diseases  | Female | Rainfall Quintile 4 (proportion)                    |          | X |   |          | X |   |
| Other infectious diseases  | Female | Rainfall Quintile 5 (proportion)                    |          | X |   |          | X |   |
| Other infectious diseases  | Female | Sanitation (proportion with access)                 |          | X |   |          | X |   |
| Other infectious diseases  | Female | DTP3 Coverage (proportion)                          | X        |   |   |          |   | X |
| Other infectious diseases  | Female | Education (years per capita)                        |          |   | X |          |   | X |
| Other infectious diseases  | Female | LDI (IS per capita)                                 |          |   | X |          |   | X |
| Other infectious diseases  | Female | Latitude 15 to 30 (proportion)                      |          | X |   |          |   | X |
| Other infectious diseases  | Female | Latitude 30 to 45 (proportion)                      |          | X |   |          |   | X |
| Other infectious diseases  | Female | Latitude Under 15 (proportion)                      |          | X |   |          |   | X |
| Other infectious diseases  | Female | Sociodemographic Status                             |          |   |   |          |   | X |
| Lip and oral cavity cancer | Male   | Alcohol (litres per capita)                         | X        |   |   | X        |   |   |
| Lip and oral cavity cancer | Male   | Cumulative Cigarettes (10 Years)                    | X        |   |   | X        |   |   |
| Lip and oral cavity cancer | Male   | Cumulative Cigarettes (20 Years)                    | X        |   |   | X        |   |   |
| Lip and oral cavity cancer | Male   | Log-transformed SEV scalar: Mouth C                 |          |   |   | X        |   |   |
| Lip and oral cavity cancer | Male   | Smoking Prevalence                                  | X        |   |   | X        |   |   |
| Lip and oral cavity cancer | Male   | Fruits (kcal per capita)                            | X        |   |   |          | X |   |
| Lip and oral cavity cancer | Male   | Health System Access 2 (unitless)                   |          | X |   |          | X |   |
| Lip and oral cavity cancer | Male   | Red Meat (kcal per capita)                          |          | X |   |          | X |   |
| Lip and oral cavity cancer | Male   | Vegetables (kcal per capita)                        | X        |   |   |          | X |   |
| Lip and oral cavity cancer | Male   | Education (years per capita)                        |          |   | X |          |   | X |
| Lip and oral cavity cancer | Male   | LDI (IS per capita)                                 |          |   | X |          |   | X |
| Lip and oral cavity cancer | Male   | Sociodemographic Status                             |          |   |   |          |   | X |
| Lip and oral cavity cancer | Male   | Cumulative Cigarettes (5 Years)                     | X        |   |   |          |   |   |
| Lip and oral cavity cancer | Female | Alcohol (litres per capita)                         | X        |   |   | X        |   |   |
| Lip and oral cavity cancer | Female | Cumulative Cigarettes (10 Years)                    | X        |   |   | X        |   |   |
| Lip and oral cavity cancer | Female | Cumulative Cigarettes (20 Years)                    | X        |   |   | X        |   |   |
| Lip and oral cavity cancer | Female | Smoking Prevalence                                  | X        |   |   | X        |   |   |
| Lip and oral cavity cancer | Female | Vegetables (kcal per capita)                        | X        |   |   | X        |   |   |
| Lip and oral cavity cancer | Female | Fruits (kcal per capita)                            | X        |   |   |          | X |   |
| Lip and oral cavity cancer | Female | Health System Access 2 (unitless)                   |          | X |   |          | X |   |
| Lip and oral cavity cancer | Female | Red Meat (kcal per capita)                          |          | X |   |          | X |   |
| Lip and oral cavity cancer | Female | Education (years per capita)                        |          |   | X |          |   | X |
| Lip and oral cavity cancer | Female | LDI (IS per capita)                                 |          |   | X |          |   | X |
| Lip and oral cavity cancer | Female | Sociodemographic Status                             |          |   |   |          |   | X |
| Lip and oral cavity cancer | Female | Cumulative Cigarettes (5 Years)                     | X        |   |   |          |   |   |
| Nasopharynx cancer         | Male   | Alcohol (litres per capita)                         | X        |   |   | X        |   |   |
| Nasopharynx cancer         | Male   | Log-transformed SEV scalar: Nasoph C                |          |   |   | X        |   |   |
| Nasopharynx cancer         | Male   | Vegetables (kcal per capita)                        | X        |   |   | X        |   |   |
| Nasopharynx cancer         | Male   | Fruits (kcal per capita)                            |          | X |   |          | X |   |
| Nasopharynx cancer         | Male   | Health System Access 2 (unitless)                   |          | X |   |          | X |   |
| Nasopharynx cancer         | Male   | Malnutrition (proportion <2SD weight for age)       |          | X |   |          | X |   |
| Nasopharynx cancer         | Male   | Population Density (over 1000 ppl/sqkm, proportion) |          | X |   |          | X |   |
| Nasopharynx cancer         | Male   | Population Density (under 150 ppl/sqkm, proportion) |          | X |   |          | X |   |
| Nasopharynx cancer         | Male   | Whole Grains (kcal per capita)                      |          | X |   |          | X |   |
| Nasopharynx cancer         | Male   | Education (years per capita)                        |          |   | X |          |   | X |
| Nasopharynx cancer         | Male   | LDI (IS per capita)                                 |          |   | X |          |   | X |
| Nasopharynx cancer         | Male   | Sociodemographic Status                             |          |   |   |          |   | X |
| Nasopharynx cancer         | Female | Alcohol (litres per capita)                         | X        |   |   | X        |   |   |

Appendix Table 12: Comparison of GBD 2013 and GBD 2015 covariates and level of covariates in cause of death modeling

|                      |        |                                                     | GBD 2013 |   | GBD 2015 |   |
|----------------------|--------|-----------------------------------------------------|----------|---|----------|---|
|                      |        |                                                     |          |   |          |   |
| Nasopharynx cancer   | Female | Log-transformed SEV scalar: Nasoph C                |          |   | X        |   |
| Nasopharynx cancer   | Female | Vegetables (kcal per capita)                        | X        |   | X        |   |
| Nasopharynx cancer   | Female | Fruits (kcal per capita)                            |          | X |          | X |
| Nasopharynx cancer   | Female | Health System Access 2 (unitless)                   |          | X |          | X |
| Nasopharynx cancer   | Female | Malnutrition (proportion <2SD weight for age)       |          | X |          | X |
| Nasopharynx cancer   | Female | Population Density (over 1000 ppl/sqkm, proportion) |          | X |          | X |
| Nasopharynx cancer   | Female | Population Density (under 150 ppl/sqkm, proportion) |          | X |          | X |
| Nasopharynx cancer   | Female | Whole Grains (kcal per capita)                      |          | X |          | X |
| Nasopharynx cancer   | Female | Education (years per capita)                        |          |   | X        | X |
| Nasopharynx cancer   | Female | LDI (IS per capita)                                 |          |   | X        | X |
| Nasopharynx cancer   | Female | Sociodemographic Status                             |          |   |          | X |
| Other pharynx cancer | Male   | Alcohol (litres per capita)                         | X        |   | X        |   |
| Other pharynx cancer | Male   | Fruits (kcal per capita)                            | X        |   | X        |   |
| Other pharynx cancer | Male   | Log-transformed SEV scalar: Oth Phar C              |          |   | X        |   |
| Other pharynx cancer | Male   | Smoking Prevalence                                  | X        |   | X        |   |
| Other pharynx cancer | Male   | Vegetables (kcal per capita)                        | X        |   | X        |   |
| Other pharynx cancer | Male   | Cumulative Cigarettes (5 Years)                     |          | X |          | X |
| Other pharynx cancer | Male   | Health System Access (capped)                       |          | X |          | X |
| Other pharynx cancer | Male   | Malnutrition (proportion <2SD weight for age)       |          | X |          | X |
| Other pharynx cancer | Male   | Population Density (over 1000 ppl/sqkm, proportion) |          | X |          | X |
| Other pharynx cancer | Male   | Population Density (under 150 ppl/sqkm, proportion) |          | X |          | X |
| Other pharynx cancer | Male   | Whole Grains (kcal per capita)                      |          | X |          | X |
| Other pharynx cancer | Male   | Education (years per capita)                        |          |   | X        | X |
| Other pharynx cancer | Male   | LDI (IS per capita)                                 |          |   | X        | X |
| Other pharynx cancer | Male   | Sociodemographic Status                             |          |   |          | X |
| Other pharynx cancer | Female | Alcohol (litres per capita)                         | X        |   | X        |   |
| Other pharynx cancer | Female | Fruits (kcal per capita)                            | X        |   | X        |   |
| Other pharynx cancer | Female | Log-transformed SEV scalar: Oth Phar C              |          |   | X        |   |
| Other pharynx cancer | Female | Smoking Prevalence                                  | X        |   | X        |   |
| Other pharynx cancer | Female | Vegetables (kcal per capita)                        | X        |   | X        |   |
| Other pharynx cancer | Female | Cumulative Cigarettes (5 Years)                     |          | X |          | X |
| Other pharynx cancer | Female | Health System Access (capped)                       |          | X |          | X |
| Other pharynx cancer | Female | Malnutrition (proportion <2SD weight for age)       |          | X |          | X |
| Other pharynx cancer | Female | Population Density (over 1000 ppl/sqkm, proportion) |          | X |          | X |
| Other pharynx cancer | Female | Population Density (under 150 ppl/sqkm, proportion) |          | X |          | X |
| Other pharynx cancer | Female | Whole Grains (kcal per capita)                      |          | X |          | X |
| Other pharynx cancer | Female | Education (years per capita)                        |          |   | X        | X |
| Other pharynx cancer | Female | LDI (IS per capita)                                 |          |   | X        | X |
| Other pharynx cancer | Female | Sociodemographic Status                             |          |   |          | X |
| Esophageal cancer    | Male   | Alcohol (litres per capita)                         | X        |   | X        |   |
| Esophageal cancer    | Male   | Fruits (kcal per capita)                            | X        |   | X        |   |
| Esophageal cancer    | Male   | Mean BMI                                            | X        |   | X        |   |
| Esophageal cancer    | Male   | Smoking Prevalence                                  | X        |   | X        |   |
| Esophageal cancer    | Male   | Tobacco (cigarettes per capita)                     | X        |   | X        |   |
| Esophageal cancer    | Male   | Improved Water Source (proportion with access)      |          | X |          | X |
| Esophageal cancer    | Male   | Indoor Air Pollution (All Cooking Fuels)            |          | X |          | X |
| Esophageal cancer    | Male   | Indoor Air Pollution (Biomass Cooking)              |          | X |          | X |
| Esophageal cancer    | Male   | Indoor Air Pollution (Coal Cooking)                 |          | X |          | X |
| Esophageal cancer    | Male   | Sanitation (proportion with access)                 |          | X |          | X |
| Esophageal cancer    | Male   | Vegetables (kcal per capita)                        |          | X |          | X |
| Esophageal cancer    | Male   | Education (years per capita)                        |          |   | X        | X |
| Esophageal cancer    | Male   | LDI (IS per capita)                                 |          |   | X        | X |
| Esophageal cancer    | Male   | Sociodemographic Status                             |          |   |          | X |
| Esophageal cancer    | Male   | Cumulative Cigarettes (15 Years)                    | X        |   |          |   |
| Esophageal cancer    | Male   | Cumulative Cigarettes (20 Years)                    | X        |   |          |   |
| Esophageal cancer    | Male   | Outdoor Air Pollution (PM2.5)                       |          | X |          |   |
| Esophageal cancer    | Male   | Total Calories (kcal per capita)                    |          | X |          |   |
| Esophageal cancer    | Female | Alcohol (litres per capita)                         | X        |   | X        |   |
| Esophageal cancer    | Female | Fruits (kcal per capita)                            | X        |   | X        |   |
| Esophageal cancer    | Female | Mean BMI                                            | X        |   | X        |   |
| Esophageal cancer    | Female | Smoking Prevalence                                  | X        |   | X        |   |
| Esophageal cancer    | Female | Tobacco (cigarettes per capita)                     | X        |   | X        |   |
| Esophageal cancer    | Female | Improved Water Source (proportion with access)      |          | X |          | X |
| Esophageal cancer    | Female | Indoor Air Pollution (All Cooking Fuels)            |          | X |          | X |
| Esophageal cancer    | Female | Indoor Air Pollution (Biomass Cooking)              |          | X |          | X |
| Esophageal cancer    | Female | Indoor Air Pollution (Coal Cooking)                 |          | X |          | X |
| Esophageal cancer    | Female | Sanitation (proportion with access)                 |          | X |          | X |
| Esophageal cancer    | Female | Vegetables (kcal per capita)                        |          | X |          | X |
| Esophageal cancer    | Female | Education (years per capita)                        |          |   | X        | X |
| Esophageal cancer    | Female | LDI (IS per capita)                                 |          |   | X        | X |
| Esophageal cancer    | Female | Sociodemographic Status                             |          |   |          | X |
| Esophageal cancer    | Female | Cumulative Cigarettes (15 Years)                    | X        |   |          |   |
| Esophageal cancer    | Female | Cumulative Cigarettes (20 Years)                    | X        |   |          |   |
| Esophageal cancer    | Female | Outdoor Air Pollution (PM2.5)                       |          | X |          |   |
| Esophageal cancer    | Female | Total Calories (kcal per capita)                    |          | X |          |   |
| Stomach cancer       | Male   | Alcohol (litres per capita)                         |          | X |          | X |
| Stomach cancer       | Male   | Cumulative Cigarettes (10 Years)                    | X        |   | X        |   |
| Stomach cancer       | Male   | Cumulative Cigarettes (15 Years)                    | X        |   | X        |   |
| Stomach cancer       | Male   | Log-transformed SEV scalar: Stomach C               |          |   | X        |   |
| Stomach cancer       | Male   | Smoking Prevalence                                  | X        |   | X        |   |
| Stomach cancer       | Male   | Tobacco (cigarettes per capita)                     | X        |   | X        |   |
| Stomach cancer       | Male   | Fruits (kcal per capita)                            |          | X |          | X |
| Stomach cancer       | Male   | Improved Water Source (proportion with access)      |          | X |          | X |
| Stomach cancer       | Male   | Indoor Air Pollution (All Cooking Fuels)            |          | X |          | X |
| Stomach cancer       | Male   | Indoor Air Pollution (Biomass Cooking)              |          | X |          | X |

Appendix Table 12: Comparison of GBD 2013 and GBD 2015 covariates and level of covariates in cause of death modeling

|                         |        |                                                   | GBD 2013 |   | GBD 2015 |   |
|-------------------------|--------|---------------------------------------------------|----------|---|----------|---|
|                         |        |                                                   |          |   |          |   |
| Stomach cancer          | Male   | Indoor Air Pollution (Coal Cooking)               |          | X |          | X |
| Stomach cancer          | Male   | Mean BMI                                          |          | X |          | X |
| Stomach cancer          | Male   | Outdoor Air Pollution (PM2.5)                     |          | X |          | X |
| Stomach cancer          | Male   | Sanitation (proportion with access)               |          | X |          | X |
| Stomach cancer          | Male   | Vegetables (kcal per capita)                      |          | X |          | X |
| Stomach cancer          | Male   | LDI (IS per capita)                               |          |   | X        | X |
| Stomach cancer          | Male   | Sociodemographic Status                           |          |   |          | X |
| Stomach cancer          | Male   | Cumulative Cigarettes (20 Years)                  | X        |   |          |   |
| Stomach cancer          | Male   | Education (years per capita)                      |          |   | X        |   |
| Stomach cancer          | Female | Alcohol (litres per capita)                       |          | X | X        |   |
| Stomach cancer          | Female | Cumulative Cigarettes (10 Years)                  | X        |   | X        |   |
| Stomach cancer          | Female | Log-transformed SEV scalar: Stomach C             |          |   | X        |   |
| Stomach cancer          | Female | Smoking Prevalence                                | X        |   | X        |   |
| Stomach cancer          | Female | Tobacco (cigarettes per capita)                   | X        |   | X        |   |
| Stomach cancer          | Female | Fruits (kcal per capita)                          |          | X |          | X |
| Stomach cancer          | Female | Improved Water Source (proportion with access)    |          | X |          | X |
| Stomach cancer          | Female | Indoor Air Pollution (All Cooking Fuels)          |          | X |          | X |
| Stomach cancer          | Female | Indoor Air Pollution (Biomass Cooking)            |          | X |          | X |
| Stomach cancer          | Female | Indoor Air Pollution (Coal Cooking)               |          | X |          | X |
| Stomach cancer          | Female | Mean BMI                                          |          | X |          | X |
| Stomach cancer          | Female | Outdoor Air Pollution (PM2.5)                     |          | X |          | X |
| Stomach cancer          | Female | Sanitation (proportion with access)               |          | X |          | X |
| Stomach cancer          | Female | Vegetables (kcal per capita)                      |          | X |          | X |
| Stomach cancer          | Female | Education (years per capita)                      |          |   | X        | X |
| Stomach cancer          | Female | LDI (IS per capita)                               |          |   | X        | X |
| Stomach cancer          | Female | Sociodemographic Status                           |          |   |          | X |
| Stomach cancer          | Female | Cumulative Cigarettes (15 Years)                  | X        |   |          |   |
| Stomach cancer          | Female | Cumulative Cigarettes (20 Years)                  | X        |   |          |   |
| Colon and rectum cancer | Male   | Alcohol (litres per capita)                       | X        |   | X        |   |
| Colon and rectum cancer | Male   | Fruits (kcal per capita)                          | X        |   | X        |   |
| Colon and rectum cancer | Male   | Log-transformed SEV scalar: Colorect C            |          |   | X        |   |
| Colon and rectum cancer | Male   | Mean BMI                                          | X        |   | X        |   |
| Colon and rectum cancer | Male   | Smoking Prevalence                                | X        |   | X        |   |
| Colon and rectum cancer | Male   | Tobacco (cigarettes per capita)                   | X        |   | X        |   |
| Colon and rectum cancer | Male   | Vegetables (kcal per capita)                      | X        |   | X        |   |
| Colon and rectum cancer | Male   | Whole Grains (kcal per capita)                    | X        |   | X        |   |
| Colon and rectum cancer | Male   | In-Milk (kcal per capita)                         | X        |   | X        |   |
| Colon and rectum cancer | Male   | Diabetes Age-Standardised Prevalence (proportion) |          | X |          | X |
| Colon and rectum cancer | Male   | Health System Access 2 (unitless)                 |          | X |          | X |
| Colon and rectum cancer | Male   | Nuts & Seeds (kcal per capita)                    |          | X |          | X |
| Colon and rectum cancer | Male   | PUFA Omega 3 - Seafood (kcal per capita)          |          | X |          | X |
| Colon and rectum cancer | Male   | Red Meat (kcal per capita)                        |          | X |          | X |
| Colon and rectum cancer | Male   | Education (years per capita)                      |          |   | X        | X |
| Colon and rectum cancer | Male   | LDI (IS per capita)                               |          |   | X        | X |
| Colon and rectum cancer | Male   | Sociodemographic Status                           |          |   |          | X |
| Colon and rectum cancer | Female | Alcohol (litres per capita)                       | X        |   | X        |   |
| Colon and rectum cancer | Female | Fruits (kcal per capita)                          | X        |   | X        |   |
| Colon and rectum cancer | Female | Log-transformed SEV scalar: Colorect C            |          |   | X        |   |
| Colon and rectum cancer | Female | Mean BMI                                          | X        |   | X        |   |
| Colon and rectum cancer | Female | Vegetables (kcal per capita)                      | X        |   | X        |   |
| Colon and rectum cancer | Female | Whole Grains (kcal per capita)                    | X        |   | X        |   |
| Colon and rectum cancer | Female | Diabetes Age-Standardised Prevalence (proportion) |          | X |          | X |
| Colon and rectum cancer | Female | Health System Access 2 (unitless)                 |          | X |          | X |
| Colon and rectum cancer | Female | Nuts & Seeds (kcal per capita)                    |          | X |          | X |
| Colon and rectum cancer | Female | PUFA Omega 3 - Seafood (kcal per capita)          |          | X |          | X |
| Colon and rectum cancer | Female | Red Meat (kcal per capita)                        |          | X |          | X |
| Colon and rectum cancer | Female | Smoking Prevalence                                | X        |   | X        |   |
| Colon and rectum cancer | Female | Tobacco (cigarettes per capita)                   | X        |   | X        |   |
| Colon and rectum cancer | Female | In-Milk (kcal per capita)                         | X        |   | X        |   |
| Colon and rectum cancer | Female | Education (years per capita)                      |          |   | X        | X |
| Colon and rectum cancer | Female | LDI (IS per capita)                               |          |   | X        | X |
| Colon and rectum cancer | Female | Sociodemographic Status                           |          |   |          | X |
| Liver cancer            | Male   | Alcohol (litres per capita)                       | X        |   | X        |   |
| Liver cancer            | Male   | Cumulative Cigarettes (15 Years)                  | X        |   | X        |   |
| Liver cancer            | Male   | Cumulative Cigarettes (20 Years)                  | X        |   | X        |   |
| Liver cancer            | Male   | Hepatitis B Prevalence (proportion)               | X        |   | X        |   |
| Liver cancer            | Male   | Hepatitis C Prevalence (proportion)               | X        |   | X        |   |
| Liver cancer            | Male   | Log-transformed SEV scalar: Liver C               |          |   | X        |   |
| Liver cancer            | Male   | Tobacco (cigarettes per capita)                   | X        |   | X        |   |
| Liver cancer            | Male   | Animal Fats (kcal per capita)                     |          | X |          | X |
| Liver cancer            | Male   | Diabetes Age-Standardised Prevalence (proportion) |          | X |          | X |
| Liver cancer            | Male   | Health System Access 2 (unitless)                 |          | X |          | X |
| Liver cancer            | Male   | Mean BMI                                          |          | X |          | X |
| Liver cancer            | Male   | Red Meat (kcal per capita)                        |          | X |          | X |
| Liver cancer            | Male   | Education (years per capita)                      |          |   | X        | X |
| Liver cancer            | Male   | LDI (IS per capita)                               |          |   | X        | X |
| Liver cancer            | Male   | Sociodemographic Status                           |          |   |          | X |
| Liver cancer            | Female | Alcohol (litres per capita)                       | X        |   | X        |   |
| Liver cancer            | Female | Cumulative Cigarettes (15 Years)                  | X        |   | X        |   |
| Liver cancer            | Female | Cumulative Cigarettes (20 Years)                  | X        |   | X        |   |
| Liver cancer            | Female | Hepatitis B Prevalence (proportion)               | X        |   | X        |   |
| Liver cancer            | Female | Hepatitis C Prevalence (proportion)               | X        |   | X        |   |
| Liver cancer            | Female | Log-transformed SEV scalar: Liver C               |          |   | X        |   |
| Liver cancer            | Female | Tobacco (cigarettes per capita)                   | X        |   | X        |   |
| Liver cancer            | Female | Animal Fats (kcal per capita)                     |          | X |          | X |

Appendix Table 12: Comparison of GBD 2013 and GBD 2015 covariates and level of covariates in cause of death modeling

|                                      |        |                                                     | GBD 2013 |   | GBD 2015 |   |
|--------------------------------------|--------|-----------------------------------------------------|----------|---|----------|---|
|                                      |        |                                                     |          |   |          |   |
| Liver cancer                         | Female | Diabetes Age-Standardised Prevalence (proportion)   |          | X |          | X |
| Liver cancer                         | Female | Health System Access 2 (unitless)                   |          | X |          | X |
| Liver cancer                         | Female | Mean BMI                                            |          | X |          | X |
| Liver cancer                         | Female | Red Meat (kcal per capita)                          |          | X |          | X |
| Liver cancer                         | Female | Education (years per capita)                        |          |   | X        | X |
| Liver cancer                         | Female | LDI (IS per capita)                                 |          |   | X        | X |
| Liver cancer                         | Female | Sociodemographic Status                             |          |   |          | X |
| Gallbladder and biliary tract cancer | Male   | Log-transformed SEV scalar: Gallblad C              |          |   | X        |   |
| Gallbladder and biliary tract cancer | Male   | Mean BMI                                            | X        |   | X        |   |
| Gallbladder and biliary tract cancer | Male   | Total Calories (kcal per capita)                    | X        |   | X        |   |
| Gallbladder and biliary tract cancer | Male   | Alcohol (litres per capita)                         |          | X |          | X |
| Gallbladder and biliary tract cancer | Male   | Cumulative Cigarettes (10 Years)                    |          | X |          | X |
| Gallbladder and biliary tract cancer | Male   | Cumulative Cigarettes (5 Years)                     |          | X |          | X |
| Gallbladder and biliary tract cancer | Male   | Diabetes Age-Standardised Prevalence (proportion)   |          | X |          | X |
| Gallbladder and biliary tract cancer | Male   | Fruits (kcal per capita)                            |          | X |          | X |
| Gallbladder and biliary tract cancer | Male   | Health System Access (capped)                       |          | X |          | X |
| Gallbladder and biliary tract cancer | Male   | Smoking Prevalence                                  |          | X |          | X |
| Gallbladder and biliary tract cancer | Male   | Tobacco (cigarettes per capita)                     |          | X |          | X |
| Gallbladder and biliary tract cancer | Male   | Vegetables (kcal per capita)                        |          | X |          | X |
| Gallbladder and biliary tract cancer | Male   | Education (years per capita)                        |          |   | X        | X |
| Gallbladder and biliary tract cancer | Male   | LDI (IS per capita)                                 |          |   | X        | X |
| Gallbladder and biliary tract cancer | Male   | Sociodemographic Status                             |          |   |          | X |
| Gallbladder and biliary tract cancer | Female | Log-transformed SEV scalar: Gallblad C              |          |   | X        |   |
| Gallbladder and biliary tract cancer | Female | Mean BMI                                            | X        |   | X        |   |
| Gallbladder and biliary tract cancer | Female | Total Calories (kcal per capita)                    | X        |   | X        |   |
| Gallbladder and biliary tract cancer | Female | Alcohol (litres per capita)                         |          | X |          | X |
| Gallbladder and biliary tract cancer | Female | Cumulative Cigarettes (10 Years)                    |          | X |          | X |
| Gallbladder and biliary tract cancer | Female | Cumulative Cigarettes (5 Years)                     |          | X |          | X |
| Gallbladder and biliary tract cancer | Female | Diabetes Age-Standardised Prevalence (proportion)   |          | X |          | X |
| Gallbladder and biliary tract cancer | Female | Fruits (kcal per capita)                            |          | X |          | X |
| Gallbladder and biliary tract cancer | Female | Health System Access (capped)                       |          | X |          | X |
| Gallbladder and biliary tract cancer | Female | Smoking Prevalence                                  |          | X |          | X |
| Gallbladder and biliary tract cancer | Female | Tobacco (cigarettes per capita)                     |          | X |          | X |
| Gallbladder and biliary tract cancer | Female | Vegetables (kcal per capita)                        |          | X |          | X |
| Gallbladder and biliary tract cancer | Female | Education (years per capita)                        |          |   | X        | X |
| Gallbladder and biliary tract cancer | Female | LDI (IS per capita)                                 |          |   | X        | X |
| Gallbladder and biliary tract cancer | Female | Sociodemographic Status                             |          |   |          | X |
| Pancreatic cancer                    | Male   | Alcohol (litres per capita)                         |          | X |          | X |
| Pancreatic cancer                    | Male   | Cumulative Cigarettes (10 Years)                    | X        |   |          | X |
| Pancreatic cancer                    | Male   | Cumulative Cigarettes (20 Years)                    | X        |   |          | X |
| Pancreatic cancer                    | Male   | Log-transformed SEV scalar: Pancreas C              |          |   | X        |   |
| Pancreatic cancer                    | Male   | Mean BMI                                            | X        |   |          | X |
| Pancreatic cancer                    | Male   | Smoking Prevalence                                  | X        |   |          | X |
| Pancreatic cancer                    | Male   | Tobacco (cigarettes per capita)                     | X        |   |          | X |
| Pancreatic cancer                    | Male   | Animal Fats (kcal per capita)                       |          | X |          | X |
| Pancreatic cancer                    | Male   | Cumulative Cigarettes (5 Years)                     | X        |   |          | X |
| Pancreatic cancer                    | Male   | Diabetes Age-Standardised Prevalence (proportion)   |          | X |          | X |
| Pancreatic cancer                    | Male   | Fruits (kcal per capita)                            |          | X |          | X |
| Pancreatic cancer                    | Male   | Red Meat (kcal per capita)                          |          | X |          | X |
| Pancreatic cancer                    | Male   | Total Calories (kcal per capita)                    | X        |   |          | X |
| Pancreatic cancer                    | Male   | Vegetables (kcal per capita)                        |          | X |          | X |
| Pancreatic cancer                    | Male   | Education (years per capita)                        |          |   | X        | X |
| Pancreatic cancer                    | Male   | Health System Access (unitless)                     |          |   | X        | X |
| Pancreatic cancer                    | Male   | LDI (IS per capita)                                 |          |   | X        | X |
| Pancreatic cancer                    | Male   | Sociodemographic Status                             |          |   |          | X |
| Pancreatic cancer                    | Female | Cumulative Cigarettes (10 Years)                    | X        |   |          | X |
| Pancreatic cancer                    | Female | Cumulative Cigarettes (20 Years)                    | X        |   |          | X |
| Pancreatic cancer                    | Female | Cumulative Cigarettes (5 Years)                     | X        |   |          | X |
| Pancreatic cancer                    | Female | Log-transformed SEV scalar: Pancreas C              |          |   | X        |   |
| Pancreatic cancer                    | Female | Mean BMI                                            | X        |   |          | X |
| Pancreatic cancer                    | Female | Smoking Prevalence                                  | X        |   |          | X |
| Pancreatic cancer                    | Female | Tobacco (cigarettes per capita)                     | X        |   |          | X |
| Pancreatic cancer                    | Female | Total Calories (kcal per capita)                    | X        |   |          | X |
| Pancreatic cancer                    | Female | Alcohol (litres per capita)                         |          | X |          | X |
| Pancreatic cancer                    | Female | Animal Fats (kcal per capita)                       |          | X |          | X |
| Pancreatic cancer                    | Female | Diabetes Age-Standardised Prevalence (proportion)   |          | X |          | X |
| Pancreatic cancer                    | Female | Fruits (kcal per capita)                            |          | X |          | X |
| Pancreatic cancer                    | Female | Red Meat (kcal per capita)                          |          | X |          | X |
| Pancreatic cancer                    | Female | Vegetables (kcal per capita)                        |          | X |          | X |
| Pancreatic cancer                    | Female | Education (years per capita)                        |          |   | X        | X |
| Pancreatic cancer                    | Female | Health System Access (unitless)                     |          |   | X        | X |
| Pancreatic cancer                    | Female | LDI (IS per capita)                                 |          |   | X        | X |
| Pancreatic cancer                    | Female | Sociodemographic Status                             |          |   |          | X |
| Larynx cancer                        | Male   | Alcohol (litres per capita)                         | X        |   |          | X |
| Larynx cancer                        | Male   | Fruits (kcal per capita)                            | X        |   |          | X |
| Larynx cancer                        | Male   | Log-transformed SEV scalar: Larynx C                |          |   | X        |   |
| Larynx cancer                        | Male   | Vegetables (kcal per capita)                        | X        |   |          | X |
| Larynx cancer                        | Male   | Cumulative Cigarettes (10 Years)                    |          | X |          | X |
| Larynx cancer                        | Male   | Cumulative Cigarettes (15 Years)                    |          | X |          | X |
| Larynx cancer                        | Male   | Cumulative Cigarettes (20 Years)                    |          | X |          | X |
| Larynx cancer                        | Male   | Cumulative Cigarettes (5 Years)                     |          | X |          | X |
| Larynx cancer                        | Male   | Population Density (over 1000 ppl/sqkm, proportion) |          | X |          | X |
| Larynx cancer                        | Male   | Population Density (under 150 ppl/sqkm, proportion) |          | X |          | X |
| Larynx cancer                        | Male   | Smoking Prevalence                                  |          | X |          | X |
| Larynx cancer                        | Male   | Tobacco (cigarettes per capita)                     |          | X |          | X |



Appendix Table 12: Comparison of GBD 2013 and GBD 2015 covariates and level of covariates in cause of death modeling

|                                     |        |                                                     | GBD 2013 |   | GBD 2015 |   |
|-------------------------------------|--------|-----------------------------------------------------|----------|---|----------|---|
|                                     |        |                                                     |          |   |          |   |
| Larynx cancer                       | Male   | Education (years per capita)                        |          | X |          | X |
| Larynx cancer                       | Male   | LDI (IS per capita)                                 |          | X |          | X |
| Larynx cancer                       | Male   | Sociodemographic Status                             |          |   |          | X |
| Larynx cancer                       | Male   | Indoor Air Pollution (All Cooking Fuels)            | X        |   |          |   |
| Larynx cancer                       | Male   | Outdoor Air Pollution (PM2.5)                       | X        |   |          |   |
| Larynx cancer                       | Female | Alcohol (litres per capita)                         | X        |   | X        |   |
| Larynx cancer                       | Female | Fruits (kcal per capita)                            | X        |   | X        |   |
| Larynx cancer                       | Female | Log-transformed SEV scalar: Larynx C                |          |   | X        |   |
| Larynx cancer                       | Female | Vegetables (kcal per capita)                        | X        |   | X        |   |
| Larynx cancer                       | Female | Cumulative Cigarettes (10 Years)                    |          | X |          | X |
| Larynx cancer                       | Female | Cumulative Cigarettes (15 Years)                    |          | X |          | X |
| Larynx cancer                       | Female | Cumulative Cigarettes (20 Years)                    |          | X |          | X |
| Larynx cancer                       | Female | Cumulative Cigarettes (5 Years)                     |          | X |          | X |
| Larynx cancer                       | Female | Population Density (over 1000 ppl/sqkm, proportion) |          | X |          | X |
| Larynx cancer                       | Female | Population Density (under 150 ppl/sqkm, proportion) |          | X |          | X |
| Larynx cancer                       | Female | Smoking Prevalence                                  |          | X |          | X |
| Larynx cancer                       | Female | Tobacco (cigarettes per capita)                     |          | X |          | X |
| Larynx cancer                       | Female | Education (years per capita)                        |          |   | X        | X |
| Larynx cancer                       | Female | LDI (IS per capita)                                 |          |   | X        | X |
| Larynx cancer                       | Female | Sociodemographic Status                             |          |   |          | X |
| Larynx cancer                       | Female | Indoor Air Pollution (All Cooking Fuels)            |          | X |          |   |
| Larynx cancer                       | Female | Outdoor Air Pollution (PM2.5)                       |          | X |          |   |
| Tracheal, bronchus, and lung cancer | Male   | Cumulative Cigarettes (10 Years)                    | X        |   | X        |   |
| Tracheal, bronchus, and lung cancer | Male   | Cumulative Cigarettes (15 Years)                    | X        |   | X        |   |
| Tracheal, bronchus, and lung cancer | Male   | Cumulative Cigarettes (20 Years)                    | X        |   | X        |   |
| Tracheal, bronchus, and lung cancer | Male   | Cumulative Cigarettes (5 Years)                     | X        |   | X        |   |
| Tracheal, bronchus, and lung cancer | Male   | Smoking Prevalence                                  | X        |   | X        |   |
| Tracheal, bronchus, and lung cancer | Male   | Tobacco (cigarettes per capita)                     | X        |   | X        |   |
| Tracheal, bronchus, and lung cancer | Male   | Indoor Air Pollution (All Cooking Fuels)            | X        |   |          | X |
| Tracheal, bronchus, and lung cancer | Male   | Outdoor Air Pollution (PM2.5)                       | X        |   | X        |   |
| Tracheal, bronchus, and lung cancer | Male   | Education (years per capita)                        |          |   | X        | X |
| Tracheal, bronchus, and lung cancer | Male   | LDI (IS per capita)                                 |          |   | X        | X |
| Tracheal, bronchus, and lung cancer | Male   | Sociodemographic Status                             |          |   |          | X |
| Tracheal, bronchus, and lung cancer | Male   | Fruits (kcal per capita)                            | X        |   |          |   |
| Tracheal, bronchus, and lung cancer | Male   | Population Density (over 1000 ppl/sqkm, proportion) |          | X |          |   |
| Tracheal, bronchus, and lung cancer | Male   | Population Density (under 150 ppl/sqkm, proportion) |          | X |          |   |
| Tracheal, bronchus, and lung cancer | Male   | Vegetables (kcal per capita)                        |          | X |          |   |
| Tracheal, bronchus, and lung cancer | Female | Cumulative Cigarettes (10 Years)                    | X        |   | X        |   |
| Tracheal, bronchus, and lung cancer | Female | Cumulative Cigarettes (15 Years)                    | X        |   | X        |   |
| Tracheal, bronchus, and lung cancer | Female | Cumulative Cigarettes (20 Years)                    | X        |   | X        |   |
| Tracheal, bronchus, and lung cancer | Female | Cumulative Cigarettes (5 Years)                     | X        |   | X        |   |
| Tracheal, bronchus, and lung cancer | Female | Smoking Prevalence                                  | X        |   | X        |   |
| Tracheal, bronchus, and lung cancer | Female | Tobacco (cigarettes per capita)                     | X        |   | X        |   |
| Tracheal, bronchus, and lung cancer | Female | Indoor Air Pollution (All Cooking Fuels)            | X        |   |          | X |
| Tracheal, bronchus, and lung cancer | Female | Outdoor Air Pollution (PM2.5)                       | X        |   | X        |   |
| Tracheal, bronchus, and lung cancer | Female | Education (years per capita)                        |          |   | X        | X |
| Tracheal, bronchus, and lung cancer | Female | LDI (IS per capita)                                 |          |   | X        | X |
| Tracheal, bronchus, and lung cancer | Female | Sociodemographic Status                             |          |   |          | X |
| Tracheal, bronchus, and lung cancer | Female | Fruits (kcal per capita)                            | X        |   |          |   |
| Tracheal, bronchus, and lung cancer | Female | Population Density (over 1000 ppl/sqkm, proportion) |          | X |          |   |
| Tracheal, bronchus, and lung cancer | Female | Population Density (under 150 ppl/sqkm, proportion) |          | X |          |   |
| Tracheal, bronchus, and lung cancer | Female | Vegetables (kcal per capita)                        |          | X |          |   |
| Malignant skin melanoma             | Male   | Alcohol (litres per capita)                         | X        |   | X        |   |
| Malignant skin melanoma             | Male   | Cumulative Cigarettes (20 Years)                    | X        |   | X        |   |
| Malignant skin melanoma             | Male   | Smoking Prevalence                                  | X        |   | X        |   |
| Malignant skin melanoma             | Male   | Tobacco (cigarettes per capita)                     | X        |   | X        |   |
| Malignant skin melanoma             | Male   | Animal Fats (kcal per capita)                       |          | X |          | X |
| Malignant skin melanoma             | Male   | Fruits (kcal per capita)                            | X        |   |          | X |
| Malignant skin melanoma             | Male   | Latitude 15 to 30 (proportion)                      |          | X |          | X |
| Malignant skin melanoma             | Male   | Latitude 30 to 45 (proportion)                      |          | X |          | X |
| Malignant skin melanoma             | Male   | Latitude Over 45 (proportion)                       |          | X |          | X |
| Malignant skin melanoma             | Male   | Mean BMI                                            |          | X |          | X |
| Malignant skin melanoma             | Male   | Vegetables (kcal per capita)                        | X        |   |          | X |
| Malignant skin melanoma             | Male   | Education (years per capita)                        |          |   | X        | X |
| Malignant skin melanoma             | Male   | LDI (IS per capita)                                 |          |   | X        | X |
| Malignant skin melanoma             | Male   | Sociodemographic Status                             |          |   |          | X |
| Malignant skin melanoma             | Male   | Diabetes Age-Standardised Prevalence (proportion)   |          | X |          |   |
| Malignant skin melanoma             | Female | Alcohol (litres per capita)                         | X        |   | X        |   |
| Malignant skin melanoma             | Female | Cumulative Cigarettes (20 Years)                    | X        |   | X        |   |
| Malignant skin melanoma             | Female | Smoking Prevalence                                  | X        |   | X        |   |
| Malignant skin melanoma             | Female | Tobacco (cigarettes per capita)                     | X        |   | X        |   |
| Malignant skin melanoma             | Female | Animal Fats (kcal per capita)                       |          | X |          | X |
| Malignant skin melanoma             | Female | Fruits (kcal per capita)                            | X        |   |          | X |
| Malignant skin melanoma             | Female | Latitude 15 to 30 (proportion)                      |          | X |          | X |
| Malignant skin melanoma             | Female | Latitude 30 to 45 (proportion)                      |          | X |          | X |
| Malignant skin melanoma             | Female | Latitude Over 45 (proportion)                       |          | X |          | X |
| Malignant skin melanoma             | Female | Mean BMI                                            |          | X |          | X |
| Malignant skin melanoma             | Female | Vegetables (kcal per capita)                        | X        |   |          | X |
| Malignant skin melanoma             | Female | Education (years per capita)                        |          |   | X        | X |
| Malignant skin melanoma             | Female | LDI (IS per capita)                                 |          |   | X        | X |
| Malignant skin melanoma             | Female | Sociodemographic Status                             |          |   |          | X |
| Malignant skin melanoma             | Female | Diabetes Age-Standardised Prevalence (proportion)   |          | X |          |   |
| Non-melanoma skin cancer            | Male   | Cumulative Cigarettes (10 Years)                    | X        |   | X        |   |
| Non-melanoma skin cancer            | Male   | Cumulative Cigarettes (15 Years)                    | X        |   | X        |   |
| Non-melanoma skin cancer            | Male   | Cumulative Cigarettes (5 Years)                     | X        |   | X        |   |

Appendix Table 12: Comparison of GBD 2013 and GBD 2015 covariates and level of covariates in cause of death modeling

|                          |        |                                                   | GBD 2013 |   |   | GBD 2015 |   |   |
|--------------------------|--------|---------------------------------------------------|----------|---|---|----------|---|---|
|                          |        |                                                   |          |   |   |          |   |   |
| Non-melanoma skin cancer | Male   | Health System Access (capped)                     | X        |   |   | X        |   |   |
| Non-melanoma skin cancer | Male   | Smoking Prevalence                                | X        |   |   | X        |   |   |
| Non-melanoma skin cancer | Male   | Average latitude                                  |          | X |   |          | X |   |
| Non-melanoma skin cancer | Male   | Education (years per capita)                      |          |   | X |          |   | X |
| Non-melanoma skin cancer | Male   | LDI (IS per capita)                               |          |   | X |          |   | X |
| Non-melanoma skin cancer | Male   | Sociodemographic Status                           |          |   |   |          |   | X |
| Non-melanoma skin cancer | Female | Cumulative Cigarettes (10 Years)                  | X        |   |   | X        |   |   |
| Non-melanoma skin cancer | Female | Cumulative Cigarettes (15 Years)                  | X        |   |   | X        |   |   |
| Non-melanoma skin cancer | Female | Cumulative Cigarettes (5 Years)                   | X        |   |   | X        |   |   |
| Non-melanoma skin cancer | Female | Health System Access (capped)                     | X        |   |   | X        |   |   |
| Non-melanoma skin cancer | Female | Smoking Prevalence                                | X        |   |   | X        |   |   |
| Non-melanoma skin cancer | Female | Average latitude                                  |          | X |   |          | X |   |
| Non-melanoma skin cancer | Female | Education (years per capita)                      |          |   | X |          |   | X |
| Non-melanoma skin cancer | Female | LDI (IS per capita)                               |          |   | X |          |   | X |
| Non-melanoma skin cancer | Female | Sociodemographic Status                           |          |   |   |          |   | X |
| Breast cancer            | Male   | Alcohol (litres per capita)                       | X        |   |   | X        |   |   |
| Breast cancer            | Male   | Log-transformed SEV scalar: Breast C              |          |   |   | X        |   |   |
| Breast cancer            | Male   | Mean BMI                                          | X        |   |   | X        |   |   |
| Breast cancer            | Male   | Animal Fats (kcal per capita)                     |          | X |   |          | X |   |
| Breast cancer            | Male   | Cumulative Cigarettes (10 Years)                  |          | X |   |          | X |   |
| Breast cancer            | Male   | Fertility (15-19 year olds)                       |          | X |   |          | X |   |
| Breast cancer            | Male   | Fruits (kcal per capita)                          |          | X |   |          | X |   |
| Breast cancer            | Male   | Health System Access 2 (unitless)                 |          | X |   |          | X |   |
| Breast cancer            | Male   | Latitude 15 to 30 (proportion)                    |          | X |   |          | X |   |
| Breast cancer            | Male   | Latitude 30 to 45 (proportion)                    |          | X |   |          | X |   |
| Breast cancer            | Male   | Latitude Over 45 (proportion)                     |          | X |   |          | X |   |
| Breast cancer            | Male   | Total Fertility Rate                              |          | X |   |          | X |   |
| Breast cancer            | Male   | Vegetables (kcal per capita)                      |          | X |   |          | X |   |
| Breast cancer            | Male   | Education (years per capita)                      |          |   | X |          |   | X |
| Breast cancer            | Male   | LDI (IS per capita)                               |          |   | X |          |   | X |
| Breast cancer            | Male   | Sociodemographic Status                           |          |   |   |          |   | X |
| Breast cancer            | Female | Alcohol (litres per capita)                       | X        |   |   | X        |   |   |
| Breast cancer            | Female | Log-transformed SEV scalar: Breast C              |          |   |   | X        |   |   |
| Breast cancer            | Female | Mean BMI                                          | X        |   |   | X        |   |   |
| Breast cancer            | Female | Animal Fats (kcal per capita)                     |          | X |   |          | X |   |
| Breast cancer            | Female | Cumulative Cigarettes (10 Years)                  |          | X |   |          | X |   |
| Breast cancer            | Female | Fertility (15-19 year olds)                       |          | X |   |          | X |   |
| Breast cancer            | Female | Fruits (kcal per capita)                          |          | X |   |          | X |   |
| Breast cancer            | Female | Health System Access 2 (unitless)                 |          | X |   |          | X |   |
| Breast cancer            | Female | Latitude 15 to 30 (proportion)                    |          | X |   |          | X |   |
| Breast cancer            | Female | Latitude 30 to 45 (proportion)                    |          | X |   |          | X |   |
| Breast cancer            | Female | Latitude Over 45 (proportion)                     |          | X |   |          | X |   |
| Breast cancer            | Female | Total Fertility Rate                              |          | X |   |          | X |   |
| Breast cancer            | Female | Vegetables (kcal per capita)                      |          | X |   |          | X |   |
| Breast cancer            | Female | Education (years per capita)                      |          |   | X |          |   | X |
| Breast cancer            | Female | LDI (IS per capita)                               |          |   | X |          |   | X |
| Breast cancer            | Female | Sociodemographic Status                           |          |   |   |          |   | X |
| Cervical cancer          | Female | Abortion On-Demand Illegal (binary)               | X        |   |   | X        |   |   |
| Cervical cancer          | Female | Cumulative Cigarettes (10 Years)                  | X        |   |   | X        |   |   |
| Cervical cancer          | Female | Cumulative Cigarettes (15 Years)                  | X        |   |   | X        |   |   |
| Cervical cancer          | Female | Cumulative Cigarettes (5 Years)                   | X        |   |   | X        |   |   |
| Cervical cancer          | Female | HIV age-standardized prevalence                   |          |   |   | X        |   |   |
| Cervical cancer          | Female | Fertility (15-19 year olds)                       |          | X |   |          | X |   |
| Cervical cancer          | Female | Fruits (kcal per capita)                          |          | X |   |          | X |   |
| Cervical cancer          | Female | Health System Access 2 (unitless)                 |          | X |   |          | X |   |
| Cervical cancer          | Female | Smoking Prevalence                                | X        |   |   |          | X |   |
| Cervical cancer          | Female | Total Fertility Rate                              |          | X |   |          | X |   |
| Cervical cancer          | Female | Vegetables (kcal per capita)                      |          | X |   |          | X |   |
| Cervical cancer          | Female | Education (years per capita)                      |          |   | X |          |   | X |
| Cervical cancer          | Female | LDI (IS per capita)                               |          |   | X |          |   | X |
| Cervical cancer          | Female | Sociodemographic Status                           |          |   |   |          |   | X |
| Cervical cancer          | Female | HIV Prevalence, ARV-Adjusted (Custom Lag, %)      | X        |   |   |          |   |   |
| Uterine cancer           | Female | Log-transformed SEV scalar: Uterus C              |          |   |   | X        |   |   |
| Uterine cancer           | Female | Mean BMI                                          | X        |   |   | X        |   |   |
| Uterine cancer           | Female | Cumulative Cigarettes (10 Years)                  |          | X |   |          | X |   |
| Uterine cancer           | Female | Cumulative Cigarettes (5 Years)                   |          | X |   |          | X |   |
| Uterine cancer           | Female | Diabetes Age-Standardised Prevalence (proportion) |          | X |   |          | X |   |
| Uterine cancer           | Female | Fruits (kcal per capita)                          |          | X |   |          | X |   |
| Uterine cancer           | Female | Health System Access (unitless)                   |          | X |   |          | X |   |
| Uterine cancer           | Female | Smoking Prevalence                                |          | X |   |          | X |   |
| Uterine cancer           | Female | Tobacco (cigarettes per capita)                   |          | X |   |          | X |   |
| Uterine cancer           | Female | Total Fertility Rate                              |          | X |   |          | X |   |
| Uterine cancer           | Female | Vegetables (kcal per capita)                      |          | X |   |          | X |   |
| Uterine cancer           | Female | Education (years per capita)                      |          |   | X |          |   | X |
| Uterine cancer           | Female | LDI (IS per capita)                               |          |   | X |          |   | X |
| Uterine cancer           | Female | Sociodemographic Status                           |          |   |   |          |   | X |
| Ovarian cancer           | Female | Alcohol (litres per capita)                       | X        |   |   | X        |   |   |
| Ovarian cancer           | Female | Contraception (Modern) Prevalence (proportion)    | X        |   |   | X        |   |   |
| Ovarian cancer           | Female | Cumulative Cigarettes (20 Years)                  | X        |   |   | X        |   |   |
| Ovarian cancer           | Female | Log-transformed SEV scalar: Ovary C               |          |   |   | X        |   |   |
| Ovarian cancer           | Female | Tobacco (cigarettes per capita)                   | X        |   |   | X        |   |   |
| Ovarian cancer           | Female | Animal Fats (kcal per capita)                     |          | X |   |          | X |   |
| Ovarian cancer           | Female | Diabetes Age-Standardised Prevalence (proportion) |          | X |   |          | X |   |
| Ovarian cancer           | Female | Fruits (kcal per capita)                          |          | X |   |          | X |   |
| Ovarian cancer           | Female | Latitude 15 to 30 (proportion)                    |          | X |   |          | X |   |

Appendix Table 12: Comparison of GBD 2013 and GBD 2015 covariates and level of covariates in cause of death modeling

|                                 |        |                                                     | GBD 2013 |   | GBD 2015 |   |
|---------------------------------|--------|-----------------------------------------------------|----------|---|----------|---|
|                                 |        |                                                     |          |   |          |   |
| Ovarian cancer                  | Female | Latitude 30 to 45 (proportion)                      |          | X |          | X |
| Ovarian cancer                  | Female | Latitude Over 45 (proportion)                       |          | X |          | X |
| Ovarian cancer                  | Female | Mean BMI                                            |          | X |          | X |
| Ovarian cancer                  | Female | Smoking Prevalence                                  |          | X |          | X |
| Ovarian cancer                  | Female | Total Calories (kcal per capita)                    |          | X |          | X |
| Ovarian cancer                  | Female | Total Fertility Rate                                |          | X |          | X |
| Ovarian cancer                  | Female | Vegetables (kcal per capita)                        |          | X |          | X |
| Ovarian cancer                  | Female | Education (years per capita)                        |          |   | X        | X |
| Ovarian cancer                  | Female | LDI (IS per capita)                                 |          |   | X        | X |
| Ovarian cancer                  | Female | Sociodemographic Status                             |          |   |          | X |
| Prostate cancer                 | Male   | Health System Access 2 (unitless)                   | X        |   | X        |   |
| Prostate cancer                 | Male   | Log-transformed SEV scalar: Prostate C              |          |   | X        |   |
| Prostate cancer                 | Male   | Animal Fats (kcal per capita)                       |          | X |          | X |
| Prostate cancer                 | Male   | Education (years per capita)                        |          |   | X        | X |
| Prostate cancer                 | Male   | LDI (IS per capita)                                 |          |   | X        | X |
| Prostate cancer                 | Male   | Sociodemographic Status                             |          |   |          | X |
| Testicular cancer               | Male   | Cumulative Cigarettes (10 Years)                    |          | X |          | X |
| Testicular cancer               | Male   | Cumulative Cigarettes (15 Years)                    |          | X |          | X |
| Testicular cancer               | Male   | Cumulative Cigarettes (5 Years)                     |          | X |          | X |
| Testicular cancer               | Male   | Fruits (kcal per capita)                            |          | X |          | X |
| Testicular cancer               | Male   | Health System Access 2 (unitless)                   |          | X |          | X |
| Testicular cancer               | Male   | Vegetables (kcal per capita)                        |          | X |          | X |
| Testicular cancer               | Male   | Education (years per capita)                        |          |   | X        | X |
| Testicular cancer               | Male   | LDI (IS per capita)                                 |          |   | X        | X |
| Testicular cancer               | Male   | Sociodemographic Status                             |          |   |          | X |
| Kidney cancer                   | Male   | Cumulative Cigarettes (10 Years)                    | X        |   | X        |   |
| Kidney cancer                   | Male   | Cumulative Cigarettes (15 Years)                    | X        |   | X        |   |
| Kidney cancer                   | Male   | Cumulative Cigarettes (5 Years)                     | X        |   | X        |   |
| Kidney cancer                   | Male   | Log-transformed SEV scalar: Kidney C                |          |   | X        |   |
| Kidney cancer                   | Male   | Mean BMI                                            | X        |   | X        |   |
| Kidney cancer                   | Male   | Alcohol (litres per capita)                         |          | X |          | X |
| Kidney cancer                   | Male   | Diabetes Age-Standardised Prevalence (proportion)   |          | X |          | X |
| Kidney cancer                   | Male   | Health System Access 2 (unitless)                   |          | X |          | X |
| Kidney cancer                   | Male   | Smoking Prevalence                                  | X        |   |          | X |
| Kidney cancer                   | Male   | Systolic Blood Pressure (mmHg)                      |          | X |          | X |
| Kidney cancer                   | Male   | Total Calories (kcal per capita)                    | X        |   |          | X |
| Kidney cancer                   | Male   | Education (years per capita)                        |          |   | X        | X |
| Kidney cancer                   | Male   | LDI (IS per capita)                                 |          |   | X        | X |
| Kidney cancer                   | Male   | Sociodemographic Status                             |          |   |          | X |
| Kidney cancer                   | Male   | Total Fertility Rate                                |          |   | X        | X |
| Kidney cancer                   | Female | Cumulative Cigarettes (10 Years)                    | X        |   | X        |   |
| Kidney cancer                   | Female | Cumulative Cigarettes (15 Years)                    | X        |   | X        |   |
| Kidney cancer                   | Female | Cumulative Cigarettes (5 Years)                     | X        |   | X        |   |
| Kidney cancer                   | Female | Log-transformed SEV scalar: Kidney C                |          |   | X        |   |
| Kidney cancer                   | Female | Mean BMI                                            | X        |   | X        |   |
| Kidney cancer                   | Female | Alcohol (litres per capita)                         |          | X |          | X |
| Kidney cancer                   | Female | Diabetes Age-Standardised Prevalence (proportion)   |          | X |          | X |
| Kidney cancer                   | Female | Health System Access 2 (unitless)                   |          | X |          | X |
| Kidney cancer                   | Female | Smoking Prevalence                                  | X        |   |          | X |
| Kidney cancer                   | Female | Systolic Blood Pressure (mmHg)                      |          | X |          | X |
| Kidney cancer                   | Female | Total Calories (kcal per capita)                    | X        |   |          | X |
| Kidney cancer                   | Female | Education (years per capita)                        |          |   | X        | X |
| Kidney cancer                   | Female | LDI (IS per capita)                                 |          |   | X        | X |
| Kidney cancer                   | Female | Sociodemographic Status                             |          |   |          | X |
| Kidney cancer                   | Female | Total Fertility Rate                                |          |   | X        | X |
| Bladder cancer                  | Male   | Cumulative Cigarettes (10 Years)                    | X        |   | X        |   |
| Bladder cancer                  | Male   | Cumulative Cigarettes (15 Years)                    | X        |   | X        |   |
| Bladder cancer                  | Male   | Cumulative Cigarettes (5 Years)                     | X        |   | X        |   |
| Bladder cancer                  | Male   | Log-transformed SEV scalar: Bladder C               |          |   | X        |   |
| Bladder cancer                  | Male   | Smoking Prevalence                                  | X        |   | X        |   |
| Bladder cancer                  | Male   | Alcohol (litres per capita)                         |          | X |          | X |
| Bladder cancer                  | Male   | Fruits (kcal per capita)                            |          | X |          | X |
| Bladder cancer                  | Male   | Health System Access 2 (unitless)                   |          | X |          | X |
| Bladder cancer                  | Male   | Population Density (over 1000 ppl/sqkm, proportion) |          | X |          | X |
| Bladder cancer                  | Male   | Population Density (under 150 ppl/sqkm, proportion) |          | X |          | X |
| Bladder cancer                  | Male   | Vegetables (kcal per capita)                        |          | X |          | X |
| Bladder cancer                  | Male   | Education (years per capita)                        |          |   | X        | X |
| Bladder cancer                  | Male   | LDI (IS per capita)                                 |          |   | X        | X |
| Bladder cancer                  | Male   | Sociodemographic Status                             |          |   |          | X |
| Bladder cancer                  | Female | Cumulative Cigarettes (10 Years)                    | X        |   | X        |   |
| Bladder cancer                  | Female | Cumulative Cigarettes (15 Years)                    | X        |   | X        |   |
| Bladder cancer                  | Female | Cumulative Cigarettes (5 Years)                     | X        |   | X        |   |
| Bladder cancer                  | Female | Log-transformed SEV scalar: Bladder C               |          |   | X        |   |
| Bladder cancer                  | Female | Smoking Prevalence                                  | X        |   | X        |   |
| Bladder cancer                  | Female | Alcohol (litres per capita)                         |          | X |          | X |
| Bladder cancer                  | Female | Fruits (kcal per capita)                            |          | X |          | X |
| Bladder cancer                  | Female | Health System Access 2 (unitless)                   |          | X |          | X |
| Bladder cancer                  | Female | Population Density (over 1000 ppl/sqkm, proportion) |          | X |          | X |
| Bladder cancer                  | Female | Population Density (under 150 ppl/sqkm, proportion) |          | X |          | X |
| Bladder cancer                  | Female | Vegetables (kcal per capita)                        |          | X |          | X |
| Bladder cancer                  | Female | Education (years per capita)                        |          |   | X        | X |
| Bladder cancer                  | Female | LDI (IS per capita)                                 |          |   | X        | X |
| Bladder cancer                  | Female | Sociodemographic Status                             |          |   |          | X |
| Brain and nervous system cancer | Male   | Alcohol (litres per capita)                         | X        |   | X        |   |
| Brain and nervous system cancer | Male   | Cumulative Cigarettes (10 Years)                    | X        |   | X        |   |

Appendix Table 12: Comparison of GBD 2013 and GBD 2015 covariates and level of covariates in cause of death modeling

|                                 |        |                                                     | GBD 2013 |   | GBD 2015 |   |
|---------------------------------|--------|-----------------------------------------------------|----------|---|----------|---|
|                                 |        |                                                     |          |   |          |   |
| Brain and nervous system cancer | Male   | Cumulative Cigarettes (15 Years)                    | X        |   | X        |   |
| Brain and nervous system cancer | Male   | Smoking Prevalence                                  | X        |   | X        |   |
| Brain and nervous system cancer | Male   | Animal Fats (kcal per capita)                       |          | X |          | X |
| Brain and nervous system cancer | Male   | Cholesterol (total, mean per capita)                |          | X |          | X |
| Brain and nervous system cancer | Male   | Fruits (kcal per capita)                            |          | X |          | X |
| Brain and nervous system cancer | Male   | Health System Access 2 (unitless)                   |          | X |          | X |
| Brain and nervous system cancer | Male   | Red Meat (kcal per capita)                          |          | X |          | X |
| Brain and nervous system cancer | Male   | Systolic Blood Pressure (mmHg)                      |          | X |          | X |
| Brain and nervous system cancer | Male   | Vegetables (kcal per capita)                        |          | X |          | X |
| Brain and nervous system cancer | Male   | Education (years per capita)                        |          |   | X        | X |
| Brain and nervous system cancer | Male   | LDI (IS per capita)                                 |          |   | X        | X |
| Brain and nervous system cancer | Male   | Sociodemographic Status                             |          |   |          | X |
| Brain and nervous system cancer | Female | Alcohol (litres per capita)                         | X        |   | X        |   |
| Brain and nervous system cancer | Female | Cumulative Cigarettes (10 Years)                    | X        |   | X        |   |
| Brain and nervous system cancer | Female | Cumulative Cigarettes (15 Years)                    | X        |   | X        |   |
| Brain and nervous system cancer | Female | Smoking Prevalence                                  | X        |   | X        |   |
| Brain and nervous system cancer | Female | Animal Fats (kcal per capita)                       |          | X |          | X |
| Brain and nervous system cancer | Female | Cholesterol (total, mean per capita)                |          | X |          | X |
| Brain and nervous system cancer | Female | Fruits (kcal per capita)                            |          | X |          | X |
| Brain and nervous system cancer | Female | Health System Access 2 (unitless)                   |          | X |          | X |
| Brain and nervous system cancer | Female | Red Meat (kcal per capita)                          |          | X |          | X |
| Brain and nervous system cancer | Female | Systolic Blood Pressure (mmHg)                      |          | X |          | X |
| Brain and nervous system cancer | Female | Vegetables (kcal per capita)                        |          | X |          | X |
| Brain and nervous system cancer | Female | Education (years per capita)                        |          |   | X        | X |
| Brain and nervous system cancer | Female | LDI (IS per capita)                                 |          |   | X        | X |
| Brain and nervous system cancer | Female | Sociodemographic Status                             |          |   |          | X |
| Thyroid cancer                  | Male   | Alcohol (litres per capita)                         | X        |   | X        |   |
| Thyroid cancer                  | Male   | Log-transformed SEV scalar: Thyroid C               |          |   | X        |   |
| Thyroid cancer                  | Male   | Smoking Prevalence                                  | X        |   | X        |   |
| Thyroid cancer                  | Male   | Tobacco (cigarettes per capita)                     | X        |   | X        |   |
| Thyroid cancer                  | Male   | Fruits (kcal per capita)                            |          | X |          | X |
| Thyroid cancer                  | Male   | Improved Water Source (proportion with access)      |          | X |          | X |
| Thyroid cancer                  | Male   | Mean BMI                                            |          | X |          | X |
| Thyroid cancer                  | Male   | Red Meat (kcal per capita)                          |          | X |          | X |
| Thyroid cancer                  | Male   | Sanitation (proportion with access)                 |          | X |          | X |
| Thyroid cancer                  | Male   | Vegetables (kcal per capita)                        |          | X |          | X |
| Thyroid cancer                  | Male   | Education (years per capita)                        |          |   | X        | X |
| Thyroid cancer                  | Male   | LDI (IS per capita)                                 |          |   | X        | X |
| Thyroid cancer                  | Male   | Sociodemographic Status                             |          |   |          | X |
| Thyroid cancer                  | Female | Alcohol (litres per capita)                         | X        |   | X        |   |
| Thyroid cancer                  | Female | Log-transformed SEV scalar: Thyroid C               |          |   | X        |   |
| Thyroid cancer                  | Female | Smoking Prevalence                                  | X        |   | X        |   |
| Thyroid cancer                  | Female | Tobacco (cigarettes per capita)                     | X        |   | X        |   |
| Thyroid cancer                  | Female | Fruits (kcal per capita)                            |          | X |          | X |
| Thyroid cancer                  | Female | Improved Water Source (proportion with access)      |          | X |          | X |
| Thyroid cancer                  | Female | Mean BMI                                            |          | X |          | X |
| Thyroid cancer                  | Female | Red Meat (kcal per capita)                          |          | X |          | X |
| Thyroid cancer                  | Female | Sanitation (proportion with access)                 |          | X |          | X |
| Thyroid cancer                  | Female | Vegetables (kcal per capita)                        |          | X |          | X |
| Thyroid cancer                  | Female | Education (years per capita)                        |          |   | X        | X |
| Thyroid cancer                  | Female | LDI (IS per capita)                                 |          |   | X        | X |
| Thyroid cancer                  | Female | Sociodemographic Status                             |          |   |          | X |
| Mesothelioma                    | Male   | Asbestos production (binary)                        | X        |   | X        |   |
| Mesothelioma                    | Male   | Cumulative Cigarettes (5 Years)                     | X        |   | X        |   |
| Mesothelioma                    | Male   | Health System Access 2 (unitless)                   | X        |   | X        |   |
| Mesothelioma                    | Male   | Indoor Air Pollution (Coal Cooking)                 | X        |   | X        |   |
| Mesothelioma                    | Male   | Log-transformed SEV scalar: Mesothel                |          |   | X        |   |
| Mesothelioma                    | Male   | Smoking Prevalence                                  | X        |   | X        |   |
| Mesothelioma                    | Male   | Asbestos production (kg) per capita                 |          | X |          | X |
| Mesothelioma                    | Male   | Elevation 500 to 1500m (proportion)                 |          | X |          | X |
| Mesothelioma                    | Male   | Elevation Over 1500m (proportion)                   |          | X |          | X |
| Mesothelioma                    | Male   | Gold production (binary)                            |          | X |          | X |
| Mesothelioma                    | Male   | Gold production (kg) per capita                     |          | X |          | X |
| Mesothelioma                    | Male   | Population Density (over 1000 ppl/sqkm, proportion) |          | X |          | X |
| Mesothelioma                    | Male   | Population Over 65 (proportion)                     |          | X |          | X |
| Mesothelioma                    | Male   | Education (years per capita)                        |          |   | X        | X |
| Mesothelioma                    | Male   | LDI (IS per capita)                                 |          |   | X        | X |
| Mesothelioma                    | Male   | Sociodemographic Status                             |          |   |          | X |
| Mesothelioma                    | Female | Asbestos production (binary)                        | X        |   | X        |   |
| Mesothelioma                    | Female | Cumulative Cigarettes (5 Years)                     | X        |   | X        |   |
| Mesothelioma                    | Female | Health System Access 2 (unitless)                   | X        |   | X        |   |
| Mesothelioma                    | Female | Indoor Air Pollution (Coal Cooking)                 | X        |   | X        |   |
| Mesothelioma                    | Female | Log-transformed SEV scalar: Mesothel                |          |   | X        |   |
| Mesothelioma                    | Female | Smoking Prevalence                                  | X        |   | X        |   |
| Mesothelioma                    | Female | Asbestos production (kg) per capita                 |          | X |          | X |
| Mesothelioma                    | Female | Elevation 500 to 1500m (proportion)                 |          | X |          | X |
| Mesothelioma                    | Female | Elevation Over 1500m (proportion)                   |          | X |          | X |
| Mesothelioma                    | Female | Gold production (binary)                            |          | X |          | X |
| Mesothelioma                    | Female | Gold production (kg) per capita                     |          | X |          | X |
| Mesothelioma                    | Female | Population Density (over 1000 ppl/sqkm, proportion) |          | X |          | X |
| Mesothelioma                    | Female | Population Over 65 (proportion)                     |          | X |          | X |
| Mesothelioma                    | Female | Education (years per capita)                        |          |   | X        | X |
| Mesothelioma                    | Female | LDI (IS per capita)                                 |          |   | X        | X |
| Mesothelioma                    | Female | Sociodemographic Status                             |          |   |          | X |
| Hodgkin lymphoma                | Male   | Health System Access 2 (unitless)                   | X        |   | X        |   |

Appendix Table 12: Comparison of GBD 2013 and GBD 2015 covariates and level of covariates in cause of death modeling

|                         |        |                                                | GBD 2013 |   | GBD 2015 |   |
|-------------------------|--------|------------------------------------------------|----------|---|----------|---|
|                         |        |                                                |          |   |          |   |
| Hodgkin lymphoma        | Male   | Latitude 15 to 30 (proportion)                 |          | X |          | X |
| Hodgkin lymphoma        | Male   | Latitude 30 to 45 (proportion)                 |          | X |          | X |
| Hodgkin lymphoma        | Male   | Latitude Over 45 (proportion)                  |          | X |          | X |
| Hodgkin lymphoma        | Male   | Latitude Under 15 (proportion)                 |          | X |          | X |
| Hodgkin lymphoma        | Male   | Education (years per capita)                   | X        |   |          | X |
| Hodgkin lymphoma        | Male   | LDI (IS per capita)                            | X        |   |          | X |
| Hodgkin lymphoma        | Male   | Sociodemographic Status                        |          |   |          | X |
| Hodgkin lymphoma        | Female | Health System Access 2 (unitless)              | X        |   | X        |   |
| Hodgkin lymphoma        | Female | Latitude 15 to 30 (proportion)                 |          | X |          | X |
| Hodgkin lymphoma        | Female | Latitude 30 to 45 (proportion)                 |          | X |          | X |
| Hodgkin lymphoma        | Female | Latitude Over 45 (proportion)                  |          | X |          | X |
| Hodgkin lymphoma        | Female | Latitude Under 15 (proportion)                 |          | X |          | X |
| Hodgkin lymphoma        | Female | Education (years per capita)                   | X        |   |          | X |
| Hodgkin lymphoma        | Female | LDI (IS per capita)                            | X        |   |          | X |
| Hodgkin lymphoma        | Female | Sociodemographic Status                        |          |   |          | X |
| Non-Hodgkin lymphoma    | Male   | Health System Access 2 (unitless)              | X        |   | X        |   |
| Non-Hodgkin lymphoma    | Male   | Alcohol (litres per capita)                    | X        |   | X        |   |
| Non-Hodgkin lymphoma    | Male   | Cumulative Cigarettes (10 Years)               | X        |   | X        |   |
| Non-Hodgkin lymphoma    | Male   | Smoking Prevalence                             | X        |   | X        |   |
| Non-Hodgkin lymphoma    | Male   | LDI (IS per capita)                            |          | X |          | X |
| Non-Hodgkin lymphoma    | Male   | Sociodemographic Status                        |          |   |          | X |
| Non-Hodgkin lymphoma    | Male   | Total Fertility Rate                           |          | X |          | X |
| Non-Hodgkin lymphoma    | Female | Health System Access 2 (unitless)              | X        |   | X        |   |
| Non-Hodgkin lymphoma    | Female | Alcohol (litres per capita)                    | X        |   | X        |   |
| Non-Hodgkin lymphoma    | Female | Cumulative Cigarettes (10 Years)               | X        |   | X        |   |
| Non-Hodgkin lymphoma    | Female | Smoking Prevalence                             | X        |   | X        |   |
| Non-Hodgkin lymphoma    | Female | LDI (IS per capita)                            |          | X |          | X |
| Non-Hodgkin lymphoma    | Female | Sociodemographic Status                        |          |   |          | X |
| Non-Hodgkin lymphoma    | Female | Total Fertility Rate                           |          | X |          | X |
| Multiple myeloma        | Male   | Alcohol (litres per capita)                    | X        |   | X        |   |
| Multiple myeloma        | Male   | Red Meat (kcal per capita)                     | X        |   | X        |   |
| Multiple myeloma        | Male   | Smoking Prevalence                             | X        |   | X        |   |
| Multiple myeloma        | Male   | Tobacco (cigarettes per capita)                | X        |   | X        |   |
| Multiple myeloma        | Male   | Fruits (kcal per capita)                       |          | X |          | X |
| Multiple myeloma        | Male   | Improved Water Source (proportion with access) |          | X |          | X |
| Multiple myeloma        | Male   | Mean BMI                                       |          | X |          | X |
| Multiple myeloma        | Male   | Sanitation (proportion with access)            |          | X |          | X |
| Multiple myeloma        | Male   | Vegetables (kcal per capita)                   |          | X |          | X |
| Multiple myeloma        | Male   | Education (years per capita)                   |          | X |          | X |
| Multiple myeloma        | Male   | LDI (IS per capita)                            |          | X |          | X |
| Multiple myeloma        | Male   | Sociodemographic Status                        |          |   |          | X |
| Multiple myeloma        | Female | Alcohol (litres per capita)                    | X        |   | X        |   |
| Multiple myeloma        | Female | Red Meat (kcal per capita)                     | X        |   | X        |   |
| Multiple myeloma        | Female | Smoking Prevalence                             | X        |   | X        |   |
| Multiple myeloma        | Female | Tobacco (cigarettes per capita)                | X        |   | X        |   |
| Multiple myeloma        | Female | Fruits (kcal per capita)                       |          | X |          | X |
| Multiple myeloma        | Female | Improved Water Source (proportion with access) |          | X |          | X |
| Multiple myeloma        | Female | Mean BMI                                       |          | X |          | X |
| Multiple myeloma        | Female | Sanitation (proportion with access)            |          | X |          | X |
| Multiple myeloma        | Female | Vegetables (kcal per capita)                   |          | X |          | X |
| Multiple myeloma        | Female | Education (years per capita)                   |          | X |          | X |
| Multiple myeloma        | Female | LDI (IS per capita)                            |          | X |          | X |
| Multiple myeloma        | Female | Sociodemographic Status                        |          |   |          | X |
| Leukemia                | Male   | Cumulative Cigarettes (10 Years)               | X        |   | X        |   |
| Leukemia                | Male   | Cumulative Cigarettes (15 Years)               | X        |   | X        |   |
| Leukemia                | Male   | Cumulative Cigarettes (5 Years)                | X        |   | X        |   |
| Leukemia                | Male   | Health System Access 2 (unitless)              | X        |   | X        |   |
| Leukemia                | Male   | Log-transformed SEV scalar: Leukemia           |          |   | X        |   |
| Leukemia                | Male   | Smoking Prevalence                             | X        |   | X        |   |
| Leukemia                | Male   | Alcohol (litres per capita)                    | X        |   | X        |   |
| Leukemia                | Male   | Education (years per capita)                   |          | X |          | X |
| Leukemia                | Male   | LDI (IS per capita)                            |          | X |          | X |
| Leukemia                | Male   | Sociodemographic Status                        |          |   |          | X |
| Leukemia                | Male   | Total Fertility Rate                           |          | X |          |   |
| Leukemia                | Female | Cumulative Cigarettes (10 Years)               | X        |   | X        |   |
| Leukemia                | Female | Cumulative Cigarettes (15 Years)               | X        |   | X        |   |
| Leukemia                | Female | Health System Access 2 (unitless)              | X        |   | X        |   |
| Leukemia                | Female | Log-transformed SEV scalar: Leukemia           |          |   | X        |   |
| Leukemia                | Female | Smoking Prevalence                             | X        |   | X        |   |
| Leukemia                | Female | Alcohol (litres per capita)                    | X        |   | X        |   |
| Leukemia                | Female | Total Fertility Rate                           | X        |   | X        |   |
| Leukemia                | Female | Education (years per capita)                   |          | X |          | X |
| Leukemia                | Female | LDI (IS per capita)                            |          | X |          | X |
| Leukemia                | Female | Sociodemographic Status                        |          |   |          | X |
| Leukemia                | Female | Cumulative Cigarettes (5 Years)                | X        |   |          |   |
| Acute lymphoid leukemia | Male   | Cumulative Cigarettes (10 Years)               |          |   | X        |   |
| Acute lymphoid leukemia | Male   | Cumulative Cigarettes (5 Years)                |          |   | X        |   |
| Acute lymphoid leukemia | Male   | Health System Access 2 (unitless)              |          |   | X        |   |
| Acute lymphoid leukemia | Male   | Log-transformed SEV scalar: Leukemia           |          |   | X        |   |
| Acute lymphoid leukemia | Male   | Smoking Prevalence                             |          |   | X        |   |
| Acute lymphoid leukemia | Male   | Alcohol (litres per capita)                    |          |   | X        |   |
| Acute lymphoid leukemia | Male   | Education (years per capita)                   |          |   |          | X |
| Acute lymphoid leukemia | Male   | LDI (IS per capita)                            |          |   |          | X |
| Acute lymphoid leukemia | Male   | Sociodemographic Status                        |          |   |          | X |
| Acute lymphoid leukemia | Female | Cumulative Cigarettes (10 Years)               |          |   | X        |   |

Appendix Table 12: Comparison of GBD 2013 and GBD 2015 covariates and level of covariates in cause of death modeling

|                           |        |                                          | GBD 2013 |   | GBD 2015 |   |   |
|---------------------------|--------|------------------------------------------|----------|---|----------|---|---|
|                           |        |                                          |          |   |          |   |   |
| Acute lymphoid leukemia   | Female | Cumulative Cigarettes (5 Years)          |          |   | X        |   |   |
| Acute lymphoid leukemia   | Female | Health System Access 2 (unitless)        |          |   | X        |   |   |
| Acute lymphoid leukemia   | Female | Log-transformed SEV scalar: Leukemia     |          |   | X        |   |   |
| Acute lymphoid leukemia   | Female | Smoking Prevalence                       |          |   | X        |   |   |
| Acute lymphoid leukemia   | Female | Alcohol (litres per capita)              |          |   |          | X |   |
| Acute lymphoid leukemia   | Female | Education (years per capita)             |          |   |          | X |   |
| Acute lymphoid leukemia   | Female | LDI (IS per capita)                      |          |   |          | X |   |
| Acute lymphoid leukemia   | Female | Sociodemographic Status                  |          |   |          | X |   |
| Chronic lymphoid leukemia | Male   | Cumulative Cigarettes (10 Years)         |          |   | X        |   |   |
| Chronic lymphoid leukemia | Male   | Cumulative Cigarettes (5 Years)          |          |   | X        |   |   |
| Chronic lymphoid leukemia | Male   | Health System Access 2 (unitless)        |          |   | X        |   |   |
| Chronic lymphoid leukemia | Male   | Log-transformed SEV scalar: Leukemia     |          |   | X        |   |   |
| Chronic lymphoid leukemia | Male   | Smoking Prevalence                       |          |   | X        |   |   |
| Chronic lymphoid leukemia | Male   | Alcohol (litres per capita)              |          |   |          | X |   |
| Chronic lymphoid leukemia | Male   | Education (years per capita)             |          |   |          | X |   |
| Chronic lymphoid leukemia | Male   | LDI (IS per capita)                      |          |   |          | X |   |
| Chronic lymphoid leukemia | Male   | Sociodemographic Status                  |          |   |          | X |   |
| Chronic lymphoid leukemia | Female | Cumulative Cigarettes (10 Years)         |          |   | X        |   |   |
| Chronic lymphoid leukemia | Female | Cumulative Cigarettes (5 Years)          |          |   | X        |   |   |
| Chronic lymphoid leukemia | Female | Health System Access 2 (unitless)        |          |   | X        |   |   |
| Chronic lymphoid leukemia | Female | Log-transformed SEV scalar: Leukemia     |          |   | X        |   |   |
| Chronic lymphoid leukemia | Female | Smoking Prevalence                       |          |   | X        |   |   |
| Chronic lymphoid leukemia | Female | Alcohol (litres per capita)              |          |   |          | X |   |
| Chronic lymphoid leukemia | Female | Education (years per capita)             |          |   |          | X |   |
| Chronic lymphoid leukemia | Female | LDI (IS per capita)                      |          |   |          | X |   |
| Chronic lymphoid leukemia | Female | Sociodemographic Status                  |          |   |          | X |   |
| Acute myeloid leukemia    | Male   | Cumulative Cigarettes (10 Years)         |          |   | X        |   |   |
| Acute myeloid leukemia    | Male   | Cumulative Cigarettes (5 Years)          |          |   | X        |   |   |
| Acute myeloid leukemia    | Male   | Health System Access 2 (unitless)        |          |   | X        |   |   |
| Acute myeloid leukemia    | Male   | Log-transformed SEV scalar: Leukemia     |          |   | X        |   |   |
| Acute myeloid leukemia    | Male   | Smoking Prevalence                       |          |   | X        |   |   |
| Acute myeloid leukemia    | Male   | Tobacco (cigarettes per capita)          |          |   | X        |   |   |
| Acute myeloid leukemia    | Male   | Alcohol (litres per capita)              |          |   |          | X |   |
| Acute myeloid leukemia    | Male   | Education (years per capita)             |          |   |          | X |   |
| Acute myeloid leukemia    | Male   | LDI (IS per capita)                      |          |   |          | X |   |
| Acute myeloid leukemia    | Male   | Sociodemographic Status                  |          |   |          | X |   |
| Acute myeloid leukemia    | Female | Cumulative Cigarettes (10 Years)         |          |   | X        |   |   |
| Acute myeloid leukemia    | Female | Cumulative Cigarettes (5 Years)          |          |   | X        |   |   |
| Acute myeloid leukemia    | Female | Health System Access 2 (unitless)        |          |   | X        |   |   |
| Acute myeloid leukemia    | Female | Log-transformed SEV scalar: Leukemia     |          |   | X        |   |   |
| Acute myeloid leukemia    | Female | Smoking Prevalence                       |          |   | X        |   |   |
| Acute myeloid leukemia    | Female | Tobacco (cigarettes per capita)          |          |   | X        |   |   |
| Acute myeloid leukemia    | Female | Alcohol (litres per capita)              |          |   |          | X |   |
| Acute myeloid leukemia    | Female | Education (years per capita)             |          |   |          | X |   |
| Acute myeloid leukemia    | Female | LDI (IS per capita)                      |          |   |          | X |   |
| Acute myeloid leukemia    | Female | Sociodemographic Status                  |          |   |          | X |   |
| Chronic myeloid leukemia  | Male   | Cumulative Cigarettes (10 Years)         |          |   | X        |   |   |
| Chronic myeloid leukemia  | Male   | Cumulative Cigarettes (5 Years)          |          |   | X        |   |   |
| Chronic myeloid leukemia  | Male   | Health System Access 2 (unitless)        |          |   | X        |   |   |
| Chronic myeloid leukemia  | Male   | Log-transformed SEV scalar: Leukemia     |          |   | X        |   |   |
| Chronic myeloid leukemia  | Male   | Smoking Prevalence                       |          |   | X        |   |   |
| Chronic myeloid leukemia  | Male   | Alcohol (litres per capita)              |          |   |          | X |   |
| Chronic myeloid leukemia  | Male   | Education (years per capita)             |          |   |          | X |   |
| Chronic myeloid leukemia  | Male   | LDI (IS per capita)                      |          |   |          | X |   |
| Chronic myeloid leukemia  | Male   | Sociodemographic Status                  |          |   |          | X |   |
| Chronic myeloid leukemia  | Female | Cumulative Cigarettes (10 Years)         |          |   | X        |   |   |
| Chronic myeloid leukemia  | Female | Cumulative Cigarettes (5 Years)          |          |   | X        |   |   |
| Chronic myeloid leukemia  | Female | Health System Access 2 (unitless)        |          |   | X        |   |   |
| Chronic myeloid leukemia  | Female | Log-transformed SEV scalar: Leukemia     |          |   | X        |   |   |
| Chronic myeloid leukemia  | Female | Smoking Prevalence                       |          |   | X        |   |   |
| Chronic myeloid leukemia  | Female | Alcohol (litres per capita)              |          |   |          | X |   |
| Chronic myeloid leukemia  | Female | Education (years per capita)             |          |   |          | X |   |
| Chronic myeloid leukemia  | Female | LDI (IS per capita)                      |          |   |          | X |   |
| Chronic myeloid leukemia  | Female | Sociodemographic Status                  |          |   |          | X |   |
| Other neoplasms           | Male   | Smoking Prevalence                       | X        |   | X        |   |   |
| Other neoplasms           | Male   | Tobacco (cigarettes per capita)          | X        |   | X        |   |   |
| Other neoplasms           | Male   | Fruits (kcal per capita)                 |          | X |          | X |   |
| Other neoplasms           | Male   | Health System Access 2 (unitless)        |          | X |          | X |   |
| Other neoplasms           | Male   | Nuts & Seeds (kcal per capita)           |          | X |          | X |   |
| Other neoplasms           | Male   | PUFA Omega 3 - Seafood (kcal per capita) |          | X |          | X |   |
| Other neoplasms           | Male   | Vegetables (kcal per capita)             |          | X |          | X |   |
| Other neoplasms           | Male   | Education (years per capita)             |          |   | X        |   | X |
| Other neoplasms           | Male   | LDI (IS per capita)                      |          |   | X        |   | X |
| Other neoplasms           | Male   | Sociodemographic Status                  |          |   |          |   | X |
| Other neoplasms           | Female | Smoking Prevalence                       | X        |   | X        |   |   |
| Other neoplasms           | Female | Tobacco (cigarettes per capita)          | X        |   | X        |   |   |
| Other neoplasms           | Female | Fruits (kcal per capita)                 |          | X |          | X |   |
| Other neoplasms           | Female | Health System Access 2 (unitless)        |          | X |          | X |   |
| Other neoplasms           | Female | Nuts & Seeds (kcal per capita)           |          | X |          | X |   |
| Other neoplasms           | Female | PUFA Omega 3 - Seafood (kcal per capita) |          | X |          | X |   |
| Other neoplasms           | Female | Vegetables (kcal per capita)             |          | X |          | X |   |
| Other neoplasms           | Female | Education (years per capita)             |          |   | X        |   | X |
| Other neoplasms           | Female | LDI (IS per capita)                      |          |   | X        |   | X |
| Other neoplasms           | Female | Sociodemographic Status                  |          |   |          |   | X |
| Cardiovascular diseases   | Male   | Cholesterol (total, mean per capita)     | X        |   | X        |   |   |

Appendix Table 12: Comparison of GBD 2013 and GBD 2015 covariates and level of covariates in cause of death modeling

|                         |        |                                                   | GBD 2013 |   |   | GBD 2015 |   |   |
|-------------------------|--------|---------------------------------------------------|----------|---|---|----------|---|---|
|                         |        |                                                   |          |   |   |          |   |   |
| Cardiovascular diseases | Male   | Elevation Under 100m (proportion)                 | X        |   |   | X        |   |   |
| Cardiovascular diseases | Male   | Smoking Prevalence                                | X        |   |   | X        |   |   |
| Cardiovascular diseases | Male   | Alcohol (litres per capita)                       |          | X |   |          | X |   |
| Cardiovascular diseases | Male   | Animal Fats (kcal per capita)                     |          | X |   |          | X |   |
| Cardiovascular diseases | Male   | omega 3 adjusted(g)                               |          |   |   |          | X |   |
| Cardiovascular diseases | Male   | red meats adjusted(g)                             |          |   |   |          | X |   |
| Cardiovascular diseases | Male   | vegetables adjusted(g)                            |          |   |   |          | X |   |
| Cardiovascular diseases | Male   | LDI (IS per capita)                               |          |   | X |          |   | X |
| Cardiovascular diseases | Male   | Sociodemographic Status                           |          |   |   |          |   | X |
| Cardiovascular diseases | Male   | PUFA Omega 3 - Seafood (kcal per capita)          |          | X |   |          |   |   |
| Cardiovascular diseases | Male   | Red Meat (kcal per capita)                        |          | X |   |          |   |   |
| Cardiovascular diseases | Male   | Vegetables (kcal per capita)                      |          | X |   |          |   |   |
| Cardiovascular diseases | Female | Cholesterol (total, mean per capita)              | X        |   |   | X        |   |   |
| Cardiovascular diseases | Female | Elevation Under 100m (proportion)                 | X        |   |   | X        |   |   |
| Cardiovascular diseases | Female | Smoking Prevalence                                | X        |   |   | X        |   |   |
| Cardiovascular diseases | Female | Alcohol (litres per capita)                       |          | X |   |          | X |   |
| Cardiovascular diseases | Female | Animal Fats (kcal per capita)                     |          | X |   |          | X |   |
| Cardiovascular diseases | Female | omega 3 adjusted(g)                               |          |   |   |          | X |   |
| Cardiovascular diseases | Female | red meats adjusted(g)                             |          |   |   |          | X |   |
| Cardiovascular diseases | Female | vegetables adjusted(g)                            |          |   |   |          | X |   |
| Cardiovascular diseases | Female | LDI (IS per capita)                               |          |   | X |          |   | X |
| Cardiovascular diseases | Female | Sociodemographic Status                           |          |   |   |          |   | X |
| Cardiovascular diseases | Female | PUFA Omega 3 - Seafood (kcal per capita)          |          | X |   |          |   |   |
| Cardiovascular diseases | Female | Red Meat (kcal per capita)                        |          | X |   |          |   |   |
| Cardiovascular diseases | Female | Vegetables (kcal per capita)                      |          | X |   |          |   |   |
| Rheumatic heart disease | Male   | Improved Water Source (proportion with access)    | X        |   |   | X        |   |   |
| Rheumatic heart disease | Male   | Log-transformed SEV scalar: RHD                   |          |   |   | X        |   |   |
| Rheumatic heart disease | Male   | Malnutrition (proportion <2SD weight for age)     | X        |   |   | X        |   |   |
| Rheumatic heart disease | Male   | Population Under 30 (proportion)                  | X        |   |   | X        |   |   |
| Rheumatic heart disease | Male   | Sanitation (proportion with access)               | X        |   |   | X        |   |   |
| Rheumatic heart disease | Male   | Education (years per capita)                      |          |   | X |          |   | X |
| Rheumatic heart disease | Male   | Health System Access 2 (unitless)                 |          |   | X |          |   | X |
| Rheumatic heart disease | Male   | LDI (IS per capita)                               |          |   | X |          |   | X |
| Rheumatic heart disease | Male   | Sociodemographic Status                           |          |   |   |          |   | X |
| Rheumatic heart disease | Female | Improved Water Source (proportion with access)    | X        |   |   | X        |   |   |
| Rheumatic heart disease | Female | Log-transformed SEV scalar: RHD                   |          |   |   | X        |   |   |
| Rheumatic heart disease | Female | Malnutrition (proportion <2SD weight for age)     | X        |   |   | X        |   |   |
| Rheumatic heart disease | Female | Population Under 30 (proportion)                  | X        |   |   | X        |   |   |
| Rheumatic heart disease | Female | Sanitation (proportion with access)               | X        |   |   | X        |   |   |
| Rheumatic heart disease | Female | Education (years per capita)                      |          |   | X |          |   | X |
| Rheumatic heart disease | Female | Health System Access 2 (unitless)                 |          |   | X |          |   | X |
| Rheumatic heart disease | Female | LDI (IS per capita)                               |          |   | X |          |   | X |
| Rheumatic heart disease | Female | Sociodemographic Status                           |          |   |   |          |   | X |
| Ischemic heart disease  | Male   | Cholesterol (total, mean per capita)              | X        |   |   | X        |   |   |
| Ischemic heart disease  | Male   | Elevation Under 100m (proportion)                 | X        |   |   | X        |   |   |
| Ischemic heart disease  | Male   | Log-transformed SEV scalar: IHD                   |          |   |   | X        |   |   |
| Ischemic heart disease  | Male   | Smoking Prevalence                                | X        |   |   | X        |   |   |
| Ischemic heart disease  | Male   | Alcohol (litres per capita)                       |          | X |   |          | X |   |
| Ischemic heart disease  | Male   | Animal Fats (kcal per capita)                     |          | X |   |          | X |   |
| Ischemic heart disease  | Male   | omega 3 adjusted(g)                               |          |   |   |          | X |   |
| Ischemic heart disease  | Male   | vegetables adjusted(g)                            |          |   |   |          | X |   |
| Ischemic heart disease  | Male   | LDI (IS per capita)                               |          |   | X |          |   | X |
| Ischemic heart disease  | Male   | Sociodemographic Status                           |          |   |   |          |   | X |
| Ischemic heart disease  | Male   | pulses legumes adjusted(g)                        |          |   |   |          |   | X |
| Ischemic heart disease  | Male   | red meats adjusted(g)                             |          |   |   |          |   | X |
| Ischemic heart disease  | Male   | PUFA Omega 3 - Seafood (kcal per capita)          |          | X |   |          |   |   |
| Ischemic heart disease  | Male   | Pulses & Legumes (kcal per capita)                |          |   | X |          |   |   |
| Ischemic heart disease  | Male   | Red Meat (kcal per capita)                        |          |   | X |          |   |   |
| Ischemic heart disease  | Male   | Vegetables (kcal per capita)                      |          | X |   |          |   |   |
| Ischemic heart disease  | Female | Cholesterol (total, mean per capita)              | X        |   |   | X        |   |   |
| Ischemic heart disease  | Female | Elevation Under 100m (proportion)                 | X        |   |   | X        |   |   |
| Ischemic heart disease  | Female | Log-transformed SEV scalar: IHD                   |          |   |   | X        |   |   |
| Ischemic heart disease  | Female | Smoking Prevalence                                | X        |   |   | X        |   |   |
| Ischemic heart disease  | Female | Alcohol (litres per capita)                       |          | X |   |          | X |   |
| Ischemic heart disease  | Female | Animal Fats (kcal per capita)                     |          | X |   |          | X |   |
| Ischemic heart disease  | Female | omega 3 adjusted(g)                               |          |   |   |          | X |   |
| Ischemic heart disease  | Female | vegetables adjusted(g)                            |          |   |   |          | X |   |
| Ischemic heart disease  | Female | LDI (IS per capita)                               |          |   | X |          |   | X |
| Ischemic heart disease  | Female | Sociodemographic Status                           |          |   |   |          |   | X |
| Ischemic heart disease  | Female | pulses legumes adjusted(g)                        |          |   |   |          |   | X |
| Ischemic heart disease  | Female | red meats adjusted(g)                             |          |   |   |          |   | X |
| Ischemic heart disease  | Female | PUFA Omega 3 - Seafood (kcal per capita)          |          | X |   |          |   |   |
| Ischemic heart disease  | Female | Pulses & Legumes (kcal per capita)                |          |   | X |          |   |   |
| Ischemic heart disease  | Female | Red Meat (kcal per capita)                        |          |   | X |          |   |   |
| Ischemic heart disease  | Female | Vegetables (kcal per capita)                      |          | X |   |          |   |   |
| Cerebrovascular disease | Male   | Cholesterol (total, mean per capita)              | X        |   |   | X        |   |   |
| Cerebrovascular disease | Male   | Cumulative Cigarettes (5 Years)                   | X        |   |   | X        |   |   |
| Cerebrovascular disease | Male   | Log-transformed SEV scalar: Stroke                |          |   |   | X        |   |   |
| Cerebrovascular disease | Male   | Mean BMI                                          | X        |   |   | X        |   |   |
| Cerebrovascular disease | Male   | Systolic Blood Pressure (mmHg)                    | X        |   |   | X        |   |   |
| Cerebrovascular disease | Male   | Alcohol (litres per capita)                       |          | X |   |          | X |   |
| Cerebrovascular disease | Male   | fruits adjusted(g)                                |          |   |   |          | X |   |
| Cerebrovascular disease | Male   | vegetables adjusted(g)                            |          |   |   |          | X |   |
| Cerebrovascular disease | Male   | Diabetes Age-Standardised Prevalence (proportion) |          |   | X |          |   | X |
| Cerebrovascular disease | Male   | Education (years per capita)                      |          |   | X |          |   | X |

Appendix Table 12: Comparison of GBD 2013 and GBD 2015 covariates and level of covariates in cause of death modeling

|                         |        |                                                   | GBD 2013 |   | GBD 2015 |   |
|-------------------------|--------|---------------------------------------------------|----------|---|----------|---|
| Cerebrovascular disease | Male   | LDI (IS per capita)                               |          | X |          | X |
| Cerebrovascular disease | Male   | Sociodemographic Status                           |          |   |          | X |
| Cerebrovascular disease | Male   | red meats adjusted(g)                             |          |   |          | X |
| Cerebrovascular disease | Male   | whole grains adjusted(g)                          |          |   |          | X |
| Cerebrovascular disease | Male   | Animal Fats (kcal per capita)                     |          | X |          |   |
| Cerebrovascular disease | Male   | Fruits (kcal per capita)                          | X        |   |          |   |
| Cerebrovascular disease | Male   | Health System Access 2 (unitless)                 |          | X |          |   |
| Cerebrovascular disease | Male   | Nuts & Seeds (kcal per capita)                    | X        |   |          |   |
| Cerebrovascular disease | Male   | PUFA Omega 3 - Seafood (kcal per capita)          | X        |   |          |   |
| Cerebrovascular disease | Male   | PUFA Omega 6 - Vegetable Oils (kcal per capita)   | X        |   |          |   |
| Cerebrovascular disease | Male   | Pulses & Legumes (kcal per capita)                |          | X |          |   |
| Cerebrovascular disease | Male   | Red Meat (kcal per capita)                        |          | X |          |   |
| Cerebrovascular disease | Male   | Smoking Prevalence                                | X        |   |          |   |
| Cerebrovascular disease | Male   | Vegetables (kcal per capita)                      |          | X |          |   |
| Cerebrovascular disease | Male   | Whole Grains (kcal per capita)                    |          | X |          |   |
| Cerebrovascular disease | Male   | In-Milk (kcal per capita)                         |          | X |          |   |
| Cerebrovascular disease | Female | Cholesterol (total, mean per capita)              | X        |   | X        |   |
| Cerebrovascular disease | Female | Cumulative Cigarettes (5 Years)                   | X        |   | X        |   |
| Cerebrovascular disease | Female | Log-transformed SEV scalar: Stroke                |          |   | X        |   |
| Cerebrovascular disease | Female | Mean BMI                                          | X        |   | X        |   |
| Cerebrovascular disease | Female | Systolic Blood Pressure (mmHg)                    | X        |   | X        |   |
| Cerebrovascular disease | Female | Alcohol (litres per capita)                       |          | X |          | X |
| Cerebrovascular disease | Female | fruits adjusted(g)                                |          |   |          | X |
| Cerebrovascular disease | Female | vegetables adjusted(g)                            |          |   |          | X |
| Cerebrovascular disease | Female | Diabetes Age-Standardised Prevalence (proportion) |          | X |          | X |
| Cerebrovascular disease | Female | Education (years per capita)                      |          | X |          | X |
| Cerebrovascular disease | Female | LDI (IS per capita)                               |          | X |          | X |
| Cerebrovascular disease | Female | Sociodemographic Status                           |          |   |          | X |
| Cerebrovascular disease | Female | red meats adjusted(g)                             |          |   |          | X |
| Cerebrovascular disease | Female | whole grains adjusted(g)                          |          |   |          | X |
| Cerebrovascular disease | Female | Animal Fats (kcal per capita)                     |          | X |          |   |
| Cerebrovascular disease | Female | Fruits (kcal per capita)                          | X        |   |          |   |
| Cerebrovascular disease | Female | Health System Access 2 (unitless)                 |          | X |          |   |
| Cerebrovascular disease | Female | Nuts & Seeds (kcal per capita)                    | X        |   |          |   |
| Cerebrovascular disease | Female | PUFA Omega 3 - Seafood (kcal per capita)          | X        |   |          |   |
| Cerebrovascular disease | Female | PUFA Omega 6 - Vegetable Oils (kcal per capita)   | X        |   |          |   |
| Cerebrovascular disease | Female | Pulses & Legumes (kcal per capita)                |          | X |          |   |
| Cerebrovascular disease | Female | Red Meat (kcal per capita)                        |          | X |          |   |
| Cerebrovascular disease | Female | Smoking Prevalence                                | X        |   |          |   |
| Cerebrovascular disease | Female | Vegetables (kcal per capita)                      |          | X |          |   |
| Cerebrovascular disease | Female | Whole Grains (kcal per capita)                    |          | X |          |   |
| Cerebrovascular disease | Female | In-Milk (kcal per capita)                         |          | X |          |   |
| Ischemic stroke         | Male   | Cholesterol (total, mean per capita)              | X        |   | X        |   |
| Ischemic stroke         | Male   | Log-transformed SEV scalar: Isch Stroke           |          |   | X        |   |
| Ischemic stroke         | Male   | Smoking Prevalence                                | X        |   | X        |   |
| Ischemic stroke         | Male   | Alcohol (litres per capita)                       |          | X |          | X |
| Ischemic stroke         | Male   | Health System Access 2 (unitless)                 |          | X |          | X |
| Ischemic stroke         | Male   | Nuts & Seeds (kcal per capita)                    |          | X |          | X |
| Ischemic stroke         | Male   | fruits adjusted(g)                                |          |   |          | X |
| Ischemic stroke         | Male   | milk adjusted(g)                                  |          |   |          | X |
| Ischemic stroke         | Male   | nuts seeds adjusted(g)                            |          |   |          | X |
| Ischemic stroke         | Male   | pulses legumes adjusted(g)                        |          |   |          | X |
| Ischemic stroke         | Male   | vegetables adjusted(g)                            |          |   |          | X |
| Ischemic stroke         | Male   | Animal Fats (kcal per capita)                     |          | X |          | X |
| Ischemic stroke         | Male   | Education (years per capita)                      |          | X |          | X |
| Ischemic stroke         | Male   | LDI (IS per capita)                               |          | X |          | X |
| Ischemic stroke         | Male   | PUFA Omega 3 - Seafood (kcal per capita)          |          | X |          | X |
| Ischemic stroke         | Male   | Sociodemographic Status                           |          |   |          | X |
| Ischemic stroke         | Male   | omega 3 adjusted(g)                               |          |   |          | X |
| Ischemic stroke         | Male   | Fruits (kcal per capita)                          | X        |   |          |   |
| Ischemic stroke         | Male   | Pulses & Legumes (kcal per capita)                | X        |   |          |   |
| Ischemic stroke         | Male   | Vegetables (kcal per capita)                      | X        |   |          |   |
| Ischemic stroke         | Male   | In-Milk (kcal per capita)                         | X        |   |          |   |
| Ischemic stroke         | Female | Cholesterol (total, mean per capita)              | X        |   | X        |   |
| Ischemic stroke         | Female | Log-transformed SEV scalar: Isch Stroke           |          |   | X        |   |
| Ischemic stroke         | Female | Smoking Prevalence                                | X        |   | X        |   |
| Ischemic stroke         | Female | Alcohol (litres per capita)                       |          | X |          | X |
| Ischemic stroke         | Female | Health System Access 2 (unitless)                 | X        |   |          | X |
| Ischemic stroke         | Female | Nuts & Seeds (kcal per capita)                    | X        |   |          | X |
| Ischemic stroke         | Female | fruits adjusted(g)                                |          |   |          | X |
| Ischemic stroke         | Female | milk adjusted(g)                                  |          |   |          | X |
| Ischemic stroke         | Female | nuts seeds adjusted(g)                            |          |   |          | X |
| Ischemic stroke         | Female | pulses legumes adjusted(g)                        |          |   |          | X |
| Ischemic stroke         | Female | vegetables adjusted(g)                            |          |   |          | X |
| Ischemic stroke         | Female | Animal Fats (kcal per capita)                     |          | X |          | X |
| Ischemic stroke         | Female | Education (years per capita)                      |          | X |          | X |
| Ischemic stroke         | Female | LDI (IS per capita)                               |          | X |          | X |
| Ischemic stroke         | Female | PUFA Omega 3 - Seafood (kcal per capita)          |          | X |          | X |
| Ischemic stroke         | Female | Sociodemographic Status                           |          |   |          | X |
| Ischemic stroke         | Female | omega 3 adjusted(g)                               |          |   |          | X |
| Ischemic stroke         | Female | Fruits (kcal per capita)                          | X        |   |          |   |
| Ischemic stroke         | Female | Pulses & Legumes (kcal per capita)                | X        |   |          |   |
| Ischemic stroke         | Female | Vegetables (kcal per capita)                      | X        |   |          |   |
| Ischemic stroke         | Female | In-Milk (kcal per capita)                         | X        |   |          |   |
| Hemorrhagic stroke      | Male   | Log-transformed SEV scalar: Hem Stroke            |          |   | X        |   |



Appendix Table 12: Comparison of GBD 2013 and GBD 2015 covariates and level of covariates in cause of death modeling

|                                |        |                                                   | GBD 2013 |   |   | GBD 2015 |   |   |
|--------------------------------|--------|---------------------------------------------------|----------|---|---|----------|---|---|
|                                |        |                                                   |          |   |   |          |   |   |
| Hemorrhagic stroke             | Male   | Smoking Prevalence                                | X        |   |   | X        |   |   |
| Hemorrhagic stroke             | Male   | Alcohol (litres per capita)                       |          | X |   |          | X |   |
| Hemorrhagic stroke             | Male   | milk adjusted(g)                                  |          |   |   |          | X |   |
| Hemorrhagic stroke             | Male   | nuts seeds adjusted(g)                            |          |   |   |          | X |   |
| Hemorrhagic stroke             | Male   | omega 3 adjusted(g)                               |          |   |   |          | X |   |
| Hemorrhagic stroke             | Male   | pufa adjusted(percent)                            |          |   |   |          | X |   |
| Hemorrhagic stroke             | Male   | pulses legumes adjusted(g)                        |          |   |   |          | X |   |
| Hemorrhagic stroke             | Male   | vegetables adjusted(g)                            |          |   |   |          | X |   |
| Hemorrhagic stroke             | Male   | Education (years per capita)                      |          |   | X |          |   | X |
| Hemorrhagic stroke             | Male   | LDI (IS per capita)                               |          |   | X |          |   | X |
| Hemorrhagic stroke             | Male   | Sociodemographic Status                           |          |   |   |          |   | X |
| Hemorrhagic stroke             | Male   | Nuts & Seeds (kcal per capita)                    |          | X |   |          |   |   |
| Hemorrhagic stroke             | Male   | PUFA Omega 3 - Seafood (kcal per capita)          |          | X |   |          |   |   |
| Hemorrhagic stroke             | Male   | PUFA Omega 6 - Vegetable Oils (kcal per capita)   |          | X |   |          |   |   |
| Hemorrhagic stroke             | Male   | Pulses & Legumes (kcal per capita)                |          | X |   |          |   |   |
| Hemorrhagic stroke             | Male   | Vegetables (kcal per capita)                      |          | X |   |          |   |   |
| Hemorrhagic stroke             | Male   | In-Milk (kcal per capita)                         |          | X |   |          |   |   |
| Hemorrhagic stroke             | Female | Log-transformed SEV scalar: Hem Stroke            |          |   |   | X        |   |   |
| Hemorrhagic stroke             | Female | Smoking Prevalence                                | X        |   |   | X        |   |   |
| Hemorrhagic stroke             | Female | Alcohol (litres per capita)                       |          | X |   |          | X |   |
| Hemorrhagic stroke             | Female | milk adjusted(g)                                  |          |   |   |          | X |   |
| Hemorrhagic stroke             | Female | nuts seeds adjusted(g)                            |          |   |   |          | X |   |
| Hemorrhagic stroke             | Female | omega 3 adjusted(g)                               |          |   |   |          | X |   |
| Hemorrhagic stroke             | Female | pufa adjusted(percent)                            |          |   |   |          | X |   |
| Hemorrhagic stroke             | Female | pulses legumes adjusted(g)                        |          |   |   |          | X |   |
| Hemorrhagic stroke             | Female | vegetables adjusted(g)                            |          |   |   |          | X |   |
| Hemorrhagic stroke             | Female | Education (years per capita)                      |          |   | X |          |   | X |
| Hemorrhagic stroke             | Female | LDI (IS per capita)                               |          |   | X |          |   | X |
| Hemorrhagic stroke             | Female | Sociodemographic Status                           |          |   |   |          |   | X |
| Hemorrhagic stroke             | Female | Nuts & Seeds (kcal per capita)                    |          | X |   |          |   |   |
| Hemorrhagic stroke             | Female | PUFA Omega 3 - Seafood (kcal per capita)          |          | X |   |          |   |   |
| Hemorrhagic stroke             | Female | PUFA Omega 6 - Vegetable Oils (kcal per capita)   |          | X |   |          |   |   |
| Hemorrhagic stroke             | Female | Pulses & Legumes (kcal per capita)                |          | X |   |          |   |   |
| Hemorrhagic stroke             | Female | Vegetables (kcal per capita)                      |          | X |   |          |   |   |
| Hemorrhagic stroke             | Female | In-Milk (kcal per capita)                         |          | X |   |          |   |   |
| Hypertensive heart disease     | Male   | Systolic Blood Pressure (mmHg)                    | X        |   |   | X        |   |   |
| Hypertensive heart disease     | Male   | Alcohol (litres per capita)                       |          | X |   |          | X |   |
| Hypertensive heart disease     | Male   | Cumulative Cigarettes (10 Years)                  |          | X |   |          | X |   |
| Hypertensive heart disease     | Male   | Indoor Air Pollution (All Cooking Fuels)          |          | X |   |          | X |   |
| Hypertensive heart disease     | Male   | Outdoor Air Pollution (PM2.5)                     |          | X |   |          | X |   |
| Hypertensive heart disease     | Male   | energy unadjusted(kcal)                           |          |   |   |          | X |   |
| Hypertensive heart disease     | Male   | milk adjusted(g)                                  |          |   |   |          | X |   |
| Hypertensive heart disease     | Male   | nuts seeds adjusted(g)                            |          |   |   |          | X |   |
| Hypertensive heart disease     | Male   | omega 3 adjusted(g)                               |          |   |   |          | X |   |
| Hypertensive heart disease     | Male   | pulses legumes adjusted(g)                        |          |   |   |          | X |   |
| Hypertensive heart disease     | Male   | vegetables adjusted(g)                            |          |   |   |          | X |   |
| Hypertensive heart disease     | Male   | Education (years per capita)                      |          |   | X |          |   | X |
| Hypertensive heart disease     | Male   | Elevation Under 100m (proportion)                 |          |   | X |          |   | X |
| Hypertensive heart disease     | Male   | LDI (IS per capita)                               |          |   | X |          |   | X |
| Hypertensive heart disease     | Male   | Sociodemographic Status                           |          |   |   |          |   | X |
| Hypertensive heart disease     | Male   | Nuts & Seeds (kcal per capita)                    |          | X |   |          |   |   |
| Hypertensive heart disease     | Male   | PUFA Omega 3 - Seafood (kcal per capita)          |          | X |   |          |   |   |
| Hypertensive heart disease     | Male   | Pulses & Legumes (kcal per capita)                |          | X |   |          |   |   |
| Hypertensive heart disease     | Male   | Total Calories (kcal per capita)                  |          | X |   |          |   |   |
| Hypertensive heart disease     | Male   | Vegetables (kcal per capita)                      |          | X |   |          |   |   |
| Hypertensive heart disease     | Male   | In-Milk (kcal per capita)                         |          | X |   |          |   |   |
| Hypertensive heart disease     | Female | Systolic Blood Pressure (mmHg)                    | X        |   |   | X        |   |   |
| Hypertensive heart disease     | Female | Alcohol (litres per capita)                       |          | X |   |          | X |   |
| Hypertensive heart disease     | Female | Cumulative Cigarettes (10 Years)                  |          | X |   |          | X |   |
| Hypertensive heart disease     | Female | Indoor Air Pollution (All Cooking Fuels)          |          | X |   |          | X |   |
| Hypertensive heart disease     | Female | Outdoor Air Pollution (PM2.5)                     |          | X |   |          | X |   |
| Hypertensive heart disease     | Female | energy unadjusted(kcal)                           |          |   |   |          | X |   |
| Hypertensive heart disease     | Female | milk adjusted(g)                                  |          |   |   |          | X |   |
| Hypertensive heart disease     | Female | nuts seeds adjusted(g)                            |          |   |   |          | X |   |
| Hypertensive heart disease     | Female | omega 3 adjusted(g)                               |          |   |   |          | X |   |
| Hypertensive heart disease     | Female | pulses legumes adjusted(g)                        |          |   |   |          | X |   |
| Hypertensive heart disease     | Female | vegetables adjusted(g)                            |          |   |   |          | X |   |
| Hypertensive heart disease     | Female | Education (years per capita)                      |          |   | X |          |   | X |
| Hypertensive heart disease     | Female | Elevation Under 100m (proportion)                 |          |   | X |          |   | X |
| Hypertensive heart disease     | Female | LDI (IS per capita)                               |          |   | X |          |   | X |
| Hypertensive heart disease     | Female | Sociodemographic Status                           |          |   |   |          |   | X |
| Hypertensive heart disease     | Female | Nuts & Seeds (kcal per capita)                    |          | X |   |          |   |   |
| Hypertensive heart disease     | Female | PUFA Omega 3 - Seafood (kcal per capita)          |          | X |   |          |   |   |
| Hypertensive heart disease     | Female | Pulses & Legumes (kcal per capita)                |          | X |   |          |   |   |
| Hypertensive heart disease     | Female | Total Calories (kcal per capita)                  |          | X |   |          |   |   |
| Hypertensive heart disease     | Female | Vegetables (kcal per capita)                      |          | X |   |          |   |   |
| Hypertensive heart disease     | Female | In-Milk (kcal per capita)                         |          | X |   |          |   |   |
| Cardiomyopathy and myocarditis | Male   | Diabetes Age-Standardised Prevalence (proportion) | X        |   |   | X        |   |   |
| Cardiomyopathy and myocarditis | Male   | Log-transformed SEV scalar: CMP                   |          |   |   | X        |   |   |
| Cardiomyopathy and myocarditis | Male   | Systolic Blood Pressure (mmHg)                    | X        |   |   | X        |   |   |
| Cardiomyopathy and myocarditis | Male   | Alcohol (litres per capita)                       |          | X |   |          | X |   |
| Cardiomyopathy and myocarditis | Male   | Education (years per capita)                      |          |   | X |          |   | X |
| Cardiomyopathy and myocarditis | Male   | Health System Access 2 (unitless)                 |          |   | X |          |   | X |
| Cardiomyopathy and myocarditis | Male   | LDI (IS per capita)                               |          |   | X |          |   | X |
| Cardiomyopathy and myocarditis | Male   | Sociodemographic Status                           |          |   |   |          |   | X |

Appendix Table 12: Comparison of GBD 2013 and GBD 2015 covariates and level of covariates in cause of death modeling

|                                |        |                                                   | GBD 2013 |   |   | GBD 2015 |   |   |
|--------------------------------|--------|---------------------------------------------------|----------|---|---|----------|---|---|
|                                |        |                                                   |          |   |   |          |   |   |
| Cardiomyopathy and myocarditis | Female | Diabetes Age-Standardised Prevalence (proportion) | X        |   |   | X        |   |   |
| Cardiomyopathy and myocarditis | Female | Log-transformed SEV scalar: CMP                   |          |   |   | X        |   |   |
| Cardiomyopathy and myocarditis | Female | Systolic Blood Pressure (mmHg)                    | X        |   |   | X        |   |   |
| Cardiomyopathy and myocarditis | Female | Alcohol (litres per capita)                       |          | X |   |          | X |   |
| Cardiomyopathy and myocarditis | Female | Education (years per capita)                      |          |   | X |          |   | X |
| Cardiomyopathy and myocarditis | Female | Health System Access 2 (unitless)                 |          |   | X |          |   | X |
| Cardiomyopathy and myocarditis | Female | LDI (IS per capita)                               |          |   | X |          |   | X |
| Cardiomyopathy and myocarditis | Female | Sociodemographic Status                           |          |   |   |          |   | X |
| Aortic aneurysm                | Male   | Cholesterol (total, mean per capita)              | X        |   |   | X        |   |   |
| Aortic aneurysm                | Male   | Cumulative Cigarettes (5 Years)                   |          |   |   | X        |   |   |
| Aortic aneurysm                | Male   | Diabetes Age-Standardised Prevalence (proportion) | X        |   |   | X        |   |   |
| Aortic aneurysm                | Male   | Health System Access 2 (unitless)                 | X        |   |   | X        |   |   |
| Aortic aneurysm                | Male   | Log-transformed SEV scalar: Aort An               |          |   |   | X        |   |   |
| Aortic aneurysm                | Male   | Mean BMI                                          | X        |   |   | X        |   |   |
| Aortic aneurysm                | Male   | Systolic Blood Pressure (mmHg)                    | X        |   |   | X        |   |   |
| Aortic aneurysm                | Male   | Alcohol (litres per capita)                       |          | X |   |          | X |   |
| Aortic aneurysm                | Male   | Indoor Air Pollution (All Cooking Fuels)          |          | X |   |          | X |   |
| Aortic aneurysm                | Male   | Outdoor Air Pollution (PM2.5)                     |          | X |   |          | X |   |
| Aortic aneurysm                | Male   | fruits adjusted(g)                                |          |   |   |          | X |   |
| Aortic aneurysm                | Male   | red meats adjusted(g)                             |          |   |   |          | X |   |
| Aortic aneurysm                | Male   | vegetables adjusted(g)                            |          |   |   |          | X |   |
| Aortic aneurysm                | Male   | whole grains adjusted(g)                          |          |   |   |          | X |   |
| Aortic aneurysm                | Male   | Education (years per capita)                      |          |   | X |          |   | X |
| Aortic aneurysm                | Male   | LDI (IS per capita)                               |          |   | X |          |   | X |
| Aortic aneurysm                | Male   | Sociodemographic Status                           |          |   |   |          |   | X |
| Aortic aneurysm                | Male   | Animal Fats (kcal per capita)                     |          | X |   |          |   |   |
| Aortic aneurysm                | Male   | Cumulative Cigarettes (10 Years)                  |          | X |   |          |   |   |
| Aortic aneurysm                | Male   | Elevation 100 to 500m (proportion)                |          |   | X |          |   |   |
| Aortic aneurysm                | Male   | Elevation 500 to 1500m (proportion)               |          |   | X |          |   |   |
| Aortic aneurysm                | Male   | Elevation Over 1500m (proportion)                 |          |   | X |          |   |   |
| Aortic aneurysm                | Male   | Elevation Under 100m (proportion)                 |          |   | X |          |   |   |
| Aortic aneurysm                | Male   | Fruits (kcal per capita)                          |          | X |   |          |   |   |
| Aortic aneurysm                | Male   | Nuts & Seeds (kcal per capita)                    |          | X |   |          |   |   |
| Aortic aneurysm                | Male   | PUFA Omega 3 - Seafood (kcal per capita)          |          | X |   |          |   |   |
| Aortic aneurysm                | Male   | PUFA Omega 6 - Vegetable Oils (kcal per capita)   |          | X |   |          |   |   |
| Aortic aneurysm                | Male   | Pulses & Legumes (kcal per capita)                |          | X |   |          |   |   |
| Aortic aneurysm                | Male   | Red Meat (kcal per capita)                        |          | X |   |          |   |   |
| Aortic aneurysm                | Male   | Smoking Prevalence                                |          | X |   |          |   |   |
| Aortic aneurysm                | Male   | Tobacco (cigarettes per capita)                   | X        |   |   |          |   |   |
| Aortic aneurysm                | Male   | Total Calories (kcal per capita)                  |          | X |   |          |   |   |
| Aortic aneurysm                | Male   | Vegetables (kcal per capita)                      |          | X |   |          |   |   |
| Aortic aneurysm                | Male   | Whole Grains (kcal per capita)                    |          | X |   |          |   |   |
| Aortic aneurysm                | Male   | In-Milk (kcal per capita)                         |          | X |   |          |   |   |
| Aortic aneurysm                | Female | Cholesterol (total, mean per capita)              | X        |   |   | X        |   |   |
| Aortic aneurysm                | Female | Cumulative Cigarettes (5 Years)                   |          |   |   | X        |   |   |
| Aortic aneurysm                | Female | Diabetes Age-Standardised Prevalence (proportion) | X        |   |   | X        |   |   |
| Aortic aneurysm                | Female | Health System Access 2 (unitless)                 | X        |   |   | X        |   |   |
| Aortic aneurysm                | Female | Log-transformed SEV scalar: Aort An               |          |   |   | X        |   |   |
| Aortic aneurysm                | Female | Mean BMI                                          | X        |   |   | X        |   |   |
| Aortic aneurysm                | Female | Systolic Blood Pressure (mmHg)                    | X        |   |   | X        |   |   |
| Aortic aneurysm                | Female | Alcohol (litres per capita)                       |          | X |   |          | X |   |
| Aortic aneurysm                | Female | Indoor Air Pollution (All Cooking Fuels)          |          | X |   |          | X |   |
| Aortic aneurysm                | Female | Outdoor Air Pollution (PM2.5)                     |          | X |   |          | X |   |
| Aortic aneurysm                | Female | fruits adjusted(g)                                |          |   |   |          | X |   |
| Aortic aneurysm                | Female | red meats adjusted(g)                             |          |   |   |          | X |   |
| Aortic aneurysm                | Female | vegetables adjusted(g)                            |          |   |   |          | X |   |
| Aortic aneurysm                | Female | whole grains adjusted(g)                          |          |   |   |          | X |   |
| Aortic aneurysm                | Female | Education (years per capita)                      |          |   | X |          |   | X |
| Aortic aneurysm                | Female | LDI (IS per capita)                               |          |   | X |          |   | X |
| Aortic aneurysm                | Female | Sociodemographic Status                           |          |   |   |          |   | X |
| Aortic aneurysm                | Female | Animal Fats (kcal per capita)                     |          | X |   |          |   |   |
| Aortic aneurysm                | Female | Cumulative Cigarettes (10 Years)                  |          | X |   |          |   |   |
| Aortic aneurysm                | Female | Elevation 100 to 500m (proportion)                |          |   | X |          |   |   |
| Aortic aneurysm                | Female | Elevation 500 to 1500m (proportion)               |          |   | X |          |   |   |
| Aortic aneurysm                | Female | Elevation Over 1500m (proportion)                 |          |   | X |          |   |   |
| Aortic aneurysm                | Female | Elevation Under 100m (proportion)                 |          |   | X |          |   |   |
| Aortic aneurysm                | Female | Fruits (kcal per capita)                          |          | X |   |          |   |   |
| Aortic aneurysm                | Female | Nuts & Seeds (kcal per capita)                    |          | X |   |          |   |   |
| Aortic aneurysm                | Female | PUFA Omega 3 - Seafood (kcal per capita)          |          | X |   |          |   |   |
| Aortic aneurysm                | Female | PUFA Omega 6 - Vegetable Oils (kcal per capita)   |          | X |   |          |   |   |
| Aortic aneurysm                | Female | Pulses & Legumes (kcal per capita)                |          | X |   |          |   |   |
| Aortic aneurysm                | Female | Red Meat (kcal per capita)                        |          | X |   |          |   |   |
| Aortic aneurysm                | Female | Smoking Prevalence                                |          | X |   |          |   |   |
| Aortic aneurysm                | Female | Tobacco (cigarettes per capita)                   | X        |   |   |          |   |   |
| Aortic aneurysm                | Female | Total Calories (kcal per capita)                  |          | X |   |          |   |   |
| Aortic aneurysm                | Female | Vegetables (kcal per capita)                      |          | X |   |          |   |   |
| Aortic aneurysm                | Female | Whole Grains (kcal per capita)                    |          | X |   |          |   |   |
| Aortic aneurysm                | Female | In-Milk (kcal per capita)                         |          | X |   |          |   |   |
| Peripheral vascular disease    | Male   | Cholesterol (total, mean per capita)              | X        |   |   | X        |   |   |
| Peripheral vascular disease    | Male   | Diabetes Age-Standardised Prevalence (proportion) | X        |   |   | X        |   |   |
| Peripheral vascular disease    | Male   | Log-transformed SEV scalar: PVD                   |          |   |   | X        |   |   |
| Peripheral vascular disease    | Male   | Mean BMI                                          | X        |   |   | X        |   |   |
| Peripheral vascular disease    | Male   | Systolic Blood Pressure (mmHg)                    | X        |   |   | X        |   |   |
| Peripheral vascular disease    | Male   | Tobacco (cigarettes per capita)                   | X        |   |   | X        |   |   |
| Peripheral vascular disease    | Male   | Alcohol (litres per capita)                       |          | X |   |          | X |   |

Appendix Table 12: Comparison of GBD 2013 and GBD 2015 covariates and level of covariates in cause of death modeling

|                                               |        |                                                   | GBD 2013 |   | GBD 2015 |   |
|-----------------------------------------------|--------|---------------------------------------------------|----------|---|----------|---|
|                                               |        |                                                   |          |   |          |   |
| Peripheral vascular disease                   | Male   | Cumulative Cigarettes (10 Years)                  |          | X |          | X |
| Peripheral vascular disease                   | Male   | Indoor Air Pollution (All Cooking Fuels)          |          | X |          | X |
| Peripheral vascular disease                   | Male   | Outdoor Air Pollution (PM2.5)                     |          | X |          | X |
| Peripheral vascular disease                   | Male   | Smoking Prevalence                                |          | X |          | X |
| Peripheral vascular disease                   | Male   | energy unadjusted(kcal)                           |          |   |          | X |
| Peripheral vascular disease                   | Male   | fruits adjusted(g)                                |          |   |          | X |
| Peripheral vascular disease                   | Male   | nuts seeds adjusted(g)                            |          |   |          | X |
| Peripheral vascular disease                   | Male   | omega 3 adjusted(g)                               |          |   |          | X |
| Peripheral vascular disease                   | Male   | pufa adjusted(percent)                            |          |   |          | X |
| Peripheral vascular disease                   | Male   | pulses legumes adjusted(g)                        |          |   |          | X |
| Peripheral vascular disease                   | Male   | red meats adjusted(g)                             |          |   |          | X |
| Peripheral vascular disease                   | Male   | vegetables adjusted(g)                            |          |   |          | X |
| Peripheral vascular disease                   | Male   | whole grains adjusted(g)                          |          |   |          | X |
| Peripheral vascular disease                   | Male   | Education (years per capita)                      |          | X |          | X |
| Peripheral vascular disease                   | Male   | Health System Access 2 (unitless)                 |          | X |          | X |
| Peripheral vascular disease                   | Male   | LDI (IS per capita)                               |          | X |          | X |
| Peripheral vascular disease                   | Male   | Sociodemographic Status                           |          |   |          | X |
| Peripheral vascular disease                   | Male   | Fruits (kcal per capita)                          |          | X |          |   |
| Peripheral vascular disease                   | Male   | Nuts & Seeds (kcal per capita)                    |          | X |          |   |
| Peripheral vascular disease                   | Male   | PUFA Omega 3 - Seafood (kcal per capita)          |          | X |          |   |
| Peripheral vascular disease                   | Male   | PUFA Omega 6 - Vegetable Oils (kcal per capita)   |          | X |          |   |
| Peripheral vascular disease                   | Male   | Pulses & Legumes (kcal per capita)                |          | X |          |   |
| Peripheral vascular disease                   | Male   | Red Meat (kcal per capita)                        |          | X |          |   |
| Peripheral vascular disease                   | Male   | Total Calories (kcal per capita)                  |          | X |          |   |
| Peripheral vascular disease                   | Male   | Vegetables (kcal per capita)                      |          | X |          |   |
| Peripheral vascular disease                   | Male   | Whole Grains (kcal per capita)                    |          | X |          |   |
| Peripheral vascular disease                   | Female | Cholesterol (total, mean per capita)              | X        |   | X        |   |
| Peripheral vascular disease                   | Female | Diabetes Age-Standardised Prevalence (proportion) | X        |   | X        |   |
| Peripheral vascular disease                   | Female | Log-transformed SEV scalar: PVD                   |          |   | X        |   |
| Peripheral vascular disease                   | Female | Mean BMI                                          | X        |   | X        |   |
| Peripheral vascular disease                   | Female | Systolic Blood Pressure (mmHg)                    | X        |   | X        |   |
| Peripheral vascular disease                   | Female | Tobacco (cigarettes per capita)                   | X        |   | X        |   |
| Peripheral vascular disease                   | Female | Alcohol (litres per capita)                       |          | X |          | X |
| Peripheral vascular disease                   | Female | Cumulative Cigarettes (10 Years)                  |          | X |          | X |
| Peripheral vascular disease                   | Female | Indoor Air Pollution (All Cooking Fuels)          |          | X |          | X |
| Peripheral vascular disease                   | Female | Outdoor Air Pollution (PM2.5)                     |          | X |          | X |
| Peripheral vascular disease                   | Female | Smoking Prevalence                                |          | X |          | X |
| Peripheral vascular disease                   | Female | energy unadjusted(kcal)                           |          |   |          | X |
| Peripheral vascular disease                   | Female | fruits adjusted(g)                                |          |   |          | X |
| Peripheral vascular disease                   | Female | nuts seeds adjusted(g)                            |          |   |          | X |
| Peripheral vascular disease                   | Female | omega 3 adjusted(g)                               |          |   |          | X |
| Peripheral vascular disease                   | Female | pufa adjusted(percent)                            |          |   |          | X |
| Peripheral vascular disease                   | Female | pulses legumes adjusted(g)                        |          |   |          | X |
| Peripheral vascular disease                   | Female | red meats adjusted(g)                             |          |   |          | X |
| Peripheral vascular disease                   | Female | vegetables adjusted(g)                            |          |   |          | X |
| Peripheral vascular disease                   | Female | whole grains adjusted(g)                          |          |   |          | X |
| Peripheral vascular disease                   | Female | Education (years per capita)                      |          | X |          | X |
| Peripheral vascular disease                   | Female | Health System Access 2 (unitless)                 |          | X |          | X |
| Peripheral vascular disease                   | Female | LDI (IS per capita)                               |          | X |          | X |
| Peripheral vascular disease                   | Female | Sociodemographic Status                           |          |   |          | X |
| Peripheral vascular disease                   | Female | Fruits (kcal per capita)                          |          | X |          |   |
| Peripheral vascular disease                   | Female | Nuts & Seeds (kcal per capita)                    |          | X |          |   |
| Peripheral vascular disease                   | Female | PUFA Omega 3 - Seafood (kcal per capita)          |          | X |          |   |
| Peripheral vascular disease                   | Female | PUFA Omega 6 - Vegetable Oils (kcal per capita)   |          | X |          |   |
| Peripheral vascular disease                   | Female | Pulses & Legumes (kcal per capita)                |          | X |          |   |
| Peripheral vascular disease                   | Female | Red Meat (kcal per capita)                        |          | X |          |   |
| Peripheral vascular disease                   | Female | Total Calories (kcal per capita)                  |          | X |          |   |
| Peripheral vascular disease                   | Female | Vegetables (kcal per capita)                      |          | X |          |   |
| Peripheral vascular disease                   | Female | Whole Grains (kcal per capita)                    |          | X |          |   |
| Endocarditis                                  | Male   | Improved Water Source (proportion with access)    | X        |   | X        |   |
| Endocarditis                                  | Male   | Log-transformed SEV scalar: Endocar               |          |   | X        |   |
| Endocarditis                                  | Male   | Sanitation (proportion with access)               | X        |   | X        |   |
| Endocarditis                                  | Male   | Education (years per capita)                      |          | X |          | X |
| Endocarditis                                  | Male   | Health System Access 2 (unitless)                 |          |   |          | X |
| Endocarditis                                  | Male   | LDI (IS per capita)                               |          | X |          | X |
| Endocarditis                                  | Male   | Sociodemographic Status                           |          |   |          | X |
| Endocarditis                                  | Male   | Health System Access (capped)                     |          | X |          |   |
| Endocarditis                                  | Female | Improved Water Source (proportion with access)    | X        |   | X        |   |
| Endocarditis                                  | Female | Log-transformed SEV scalar: Endocar               |          |   | X        |   |
| Endocarditis                                  | Female | Sanitation (proportion with access)               | X        |   | X        |   |
| Endocarditis                                  | Female | Education (years per capita)                      |          | X |          | X |
| Endocarditis                                  | Female | Health System Access 2 (unitless)                 |          |   |          | X |
| Endocarditis                                  | Female | LDI (IS per capita)                               |          | X |          | X |
| Endocarditis                                  | Female | Sociodemographic Status                           |          |   |          | X |
| Endocarditis                                  | Female | Health System Access (capped)                     |          | X |          |   |
| Other cardiovascular and circulatory diseases | Male   | Cholesterol (total, mean per capita)              | X        |   | X        |   |
| Other cardiovascular and circulatory diseases | Male   | Diabetes Age-Standardised Prevalence (proportion) | X        |   | X        |   |
| Other cardiovascular and circulatory diseases | Male   | Log-transformed SEV scalar: Oth Cardio            |          |   | X        |   |
| Other cardiovascular and circulatory diseases | Male   | Mean BMI                                          | X        |   | X        |   |
| Other cardiovascular and circulatory diseases | Male   | Systolic Blood Pressure (mmHg)                    | X        |   | X        |   |
| Other cardiovascular and circulatory diseases | Male   | Tobacco (cigarettes per capita)                   | X        |   | X        |   |
| Other cardiovascular and circulatory diseases | Male   | Alcohol (litres per capita)                       |          | X |          | X |
| Other cardiovascular and circulatory diseases | Male   | Animal Fats (kcal per capita)                     |          | X |          | X |
| Other cardiovascular and circulatory diseases | Male   | Cumulative Cigarettes (10 Years)                  |          | X |          | X |
| Other cardiovascular and circulatory diseases | Male   | Indoor Air Pollution (All Cooking Fuels)          |          | X |          | X |

Appendix Table 12: Comparison of GBD 2013 and GBD 2015 covariates and level of covariates in cause of death modeling

|                                               |        |                                                     | GBD 2013 |   | GBD 2015 |   |
|-----------------------------------------------|--------|-----------------------------------------------------|----------|---|----------|---|
| Other cardiovascular and circulatory diseases | Male   | Outdoor Air Pollution (PM2.5)                       |          | X |          | X |
| Other cardiovascular and circulatory diseases | Male   | Smoking Prevalence                                  |          | X |          | X |
| Other cardiovascular and circulatory diseases | Male   | Vegetables (kcal per capita)                        |          | X |          | X |
| Other cardiovascular and circulatory diseases | Male   | energy unadjusted(kcal)                             |          |   |          | X |
| Other cardiovascular and circulatory diseases | Male   | fruits adjusted(g)                                  |          |   |          | X |
| Other cardiovascular and circulatory diseases | Male   | milk adjusted(g)                                    |          |   |          | X |
| Other cardiovascular and circulatory diseases | Male   | nuts seeds adjusted(g)                              |          |   |          | X |
| Other cardiovascular and circulatory diseases | Male   | omega 3 adjusted(g)                                 |          |   |          | X |
| Other cardiovascular and circulatory diseases | Male   | pufa adjusted(percent)                              |          |   |          | X |
| Other cardiovascular and circulatory diseases | Male   | pulses legumes adjusted(g)                          |          |   |          | X |
| Other cardiovascular and circulatory diseases | Male   | red meats adjusted(g)                               |          |   |          | X |
| Other cardiovascular and circulatory diseases | Male   | vegetables adjusted(g)                              |          |   |          | X |
| Other cardiovascular and circulatory diseases | Male   | whole grains adjusted(g)                            |          |   |          | X |
| Other cardiovascular and circulatory diseases | Male   | Education (years per capita)                        |          | X |          | X |
| Other cardiovascular and circulatory diseases | Male   | Elevation 100 to 500m (proportion)                  |          | X |          | X |
| Other cardiovascular and circulatory diseases | Male   | Health System Access 2 (unitless)                   |          | X |          | X |
| Other cardiovascular and circulatory diseases | Male   | LDI (IS per capita)                                 |          | X |          | X |
| Other cardiovascular and circulatory diseases | Male   | Sociodemographic Status                             |          |   |          | X |
| Other cardiovascular and circulatory diseases | Male   | Fruits (kcal per capita)                            |          | X |          |   |
| Other cardiovascular and circulatory diseases | Male   | Nuts & Seeds (kcal per capita)                      |          | X |          |   |
| Other cardiovascular and circulatory diseases | Male   | PUFA Omega 3 - Seafood (kcal per capita)            |          | X |          |   |
| Other cardiovascular and circulatory diseases | Male   | PUFA Omega 6 - Vegetable Oils (kcal per capita)     |          | X |          |   |
| Other cardiovascular and circulatory diseases | Male   | Pulses & Legumes (kcal per capita)                  |          | X |          |   |
| Other cardiovascular and circulatory diseases | Male   | Red Meat (kcal per capita)                          |          | X |          |   |
| Other cardiovascular and circulatory diseases | Male   | Total Calories (kcal per capita)                    |          | X |          |   |
| Other cardiovascular and circulatory diseases | Male   | Whole Grains (kcal per capita)                      |          | X |          |   |
| Other cardiovascular and circulatory diseases | Male   | tn-Milk (kcal per capita)                           |          | X |          |   |
| Other cardiovascular and circulatory diseases | Female | Cholesterol (total, mean per capita)                | X        |   | X        |   |
| Other cardiovascular and circulatory diseases | Female | Diabetes Age-Standardised Prevalence (proportion)   | X        |   | X        |   |
| Other cardiovascular and circulatory diseases | Female | Log-transformed SEV scalar: Oth Cardio              |          |   | X        |   |
| Other cardiovascular and circulatory diseases | Female | Mean BMI                                            | X        |   | X        |   |
| Other cardiovascular and circulatory diseases | Female | Systolic Blood Pressure (mmHg)                      | X        |   | X        |   |
| Other cardiovascular and circulatory diseases | Female | Tobacco (cigarettes per capita)                     | X        |   | X        |   |
| Other cardiovascular and circulatory diseases | Female | Alcohol (litres per capita)                         |          | X |          | X |
| Other cardiovascular and circulatory diseases | Female | Animal Fats (kcal per capita)                       |          | X |          | X |
| Other cardiovascular and circulatory diseases | Female | Cumulative Cigarettes (10 Years)                    |          | X |          | X |
| Other cardiovascular and circulatory diseases | Female | Indoor Air Pollution (All Cooking Fuels)            |          | X |          | X |
| Other cardiovascular and circulatory diseases | Female | Outdoor Air Pollution (PM2.5)                       |          | X |          | X |
| Other cardiovascular and circulatory diseases | Female | Smoking Prevalence                                  |          | X |          | X |
| Other cardiovascular and circulatory diseases | Female | Vegetables (kcal per capita)                        |          | X |          | X |
| Other cardiovascular and circulatory diseases | Female | energy unadjusted(kcal)                             |          |   |          | X |
| Other cardiovascular and circulatory diseases | Female | fruits adjusted(g)                                  |          |   |          | X |
| Other cardiovascular and circulatory diseases | Female | milk adjusted(g)                                    |          |   |          | X |
| Other cardiovascular and circulatory diseases | Female | nuts seeds adjusted(g)                              |          |   |          | X |
| Other cardiovascular and circulatory diseases | Female | omega 3 adjusted(g)                                 |          |   |          | X |
| Other cardiovascular and circulatory diseases | Female | pufa adjusted(percent)                              |          |   |          | X |
| Other cardiovascular and circulatory diseases | Female | pulses legumes adjusted(g)                          |          |   |          | X |
| Other cardiovascular and circulatory diseases | Female | red meats adjusted(g)                               |          |   |          | X |
| Other cardiovascular and circulatory diseases | Female | vegetables adjusted(g)                              |          |   |          | X |
| Other cardiovascular and circulatory diseases | Female | whole grains adjusted(g)                            |          |   |          | X |
| Other cardiovascular and circulatory diseases | Female | Education (years per capita)                        |          | X |          | X |
| Other cardiovascular and circulatory diseases | Female | Elevation 100 to 500m (proportion)                  |          | X |          | X |
| Other cardiovascular and circulatory diseases | Female | Health System Access 2 (unitless)                   |          | X |          | X |
| Other cardiovascular and circulatory diseases | Female | LDI (IS per capita)                                 |          | X |          | X |
| Other cardiovascular and circulatory diseases | Female | Sociodemographic Status                             |          |   |          | X |
| Other cardiovascular and circulatory diseases | Female | Fruits (kcal per capita)                            |          | X |          |   |
| Other cardiovascular and circulatory diseases | Female | Nuts & Seeds (kcal per capita)                      |          | X |          |   |
| Other cardiovascular and circulatory diseases | Female | PUFA Omega 3 - Seafood (kcal per capita)            |          | X |          |   |
| Other cardiovascular and circulatory diseases | Female | PUFA Omega 6 - Vegetable Oils (kcal per capita)     |          | X |          |   |
| Other cardiovascular and circulatory diseases | Female | Pulses & Legumes (kcal per capita)                  |          | X |          |   |
| Other cardiovascular and circulatory diseases | Female | Red Meat (kcal per capita)                          |          | X |          |   |
| Other cardiovascular and circulatory diseases | Female | Total Calories (kcal per capita)                    |          | X |          |   |
| Other cardiovascular and circulatory diseases | Female | Whole Grains (kcal per capita)                      |          | X |          |   |
| Other cardiovascular and circulatory diseases | Female | tn-Milk (kcal per capita)                           |          | X |          |   |
| Chronic respiratory diseases                  | Male   | Cumulative Cigarettes (10 Years)                    |          |   | X        |   |
| Chronic respiratory diseases                  | Male   | Cumulative Cigarettes (5 Years)                     | X        |   | X        |   |
| Chronic respiratory diseases                  | Male   | Health System Access 2 (unitless)                   | X        |   | X        |   |
| Chronic respiratory diseases                  | Male   | Indoor Air Pollution (Biomass Cooking)              | X        |   | X        |   |
| Chronic respiratory diseases                  | Male   | Indoor Air Pollution (Coal Cooking)                 | X        |   | X        |   |
| Chronic respiratory diseases                  | Male   | Log-transformed SEV scalar: Chr Resp                |          |   | X        |   |
| Chronic respiratory diseases                  | Male   | Smoking Prevalence                                  | X        |   | X        |   |
| Chronic respiratory diseases                  | Male   | Cumulative Cigarettes (5 Years)                     | X        |   |          | X |
| Chronic respiratory diseases                  | Male   | Elevation Over 1500m (proportion)                   |          | X |          | X |
| Chronic respiratory diseases                  | Male   | Indoor Air Pollution (Biomass Cooking)              | X        |   |          | X |
| Chronic respiratory diseases                  | Male   | Indoor Air Pollution (Coal Cooking)                 | X        |   |          | X |
| Chronic respiratory diseases                  | Male   | Outdoor Air Pollution (PM2.5)                       | X        |   |          | X |
| Chronic respiratory diseases                  | Male   | Smoking Prevalence                                  | X        |   |          | X |
| Chronic respiratory diseases                  | Male   | Education (years per capita)                        |          | X |          | X |
| Chronic respiratory diseases                  | Male   | Elevation 500 to 1500m (proportion)                 | X        |   |          | X |
| Chronic respiratory diseases                  | Male   | LDI (IS per capita)                                 |          | X |          | X |
| Chronic respiratory diseases                  | Male   | Population Density (over 1000 ppl/sqkm, proportion) |          | X |          | X |
| Chronic respiratory diseases                  | Male   | Sociodemographic Status                             |          |   |          | X |
| Chronic respiratory diseases                  | Female | Cumulative Cigarettes (10 Years)                    |          |   | X        |   |
| Chronic respiratory diseases                  | Female | Cumulative Cigarettes (5 Years)                     | X        |   | X        |   |
| Chronic respiratory diseases                  | Female | Health System Access 2 (unitless)                   | X        |   | X        |   |

Appendix Table 12: Comparison of GBD 2013 and GBD 2015 covariates and level of covariates in cause of death modeling

|                                       |        |                                                     | GBD 2013 |   | GBD 2015 |   |
|---------------------------------------|--------|-----------------------------------------------------|----------|---|----------|---|
|                                       |        |                                                     |          |   |          |   |
| Chronic respiratory diseases          | Female | Log-transformed SEV scalar: Chr Resp                |          |   | X        |   |
| Chronic respiratory diseases          | Female | Elevation Over 1500m (proportion)                   |          | X |          | X |
| Chronic respiratory diseases          | Female | Indoor Air Pollution (Biomass Cooking)              | X        |   |          | X |
| Chronic respiratory diseases          | Female | Indoor Air Pollution (Coal Cooking)                 | X        |   |          | X |
| Chronic respiratory diseases          | Female | Outdoor Air Pollution (PM2.5)                       | X        |   |          | X |
| Chronic respiratory diseases          | Female | Smoking Prevalence                                  | X        |   |          | X |
| Chronic respiratory diseases          | Female | Education (years per capita)                        |          | X |          | X |
| Chronic respiratory diseases          | Female | Elevation 500 to 1500m (proportion)                 |          | X |          | X |
| Chronic respiratory diseases          | Female | LDI (IS per capita)                                 |          | X |          | X |
| Chronic respiratory diseases          | Female | Population Density (over 1000 ppl/sqkm, proportion) |          | X |          | X |
| Chronic respiratory diseases          | Female | Sociodemographic Status                             |          |   |          | X |
| Chronic obstructive pulmonary disease | Male   | Cumulative Cigarettes (10 Years)                    |          |   | X        |   |
| Chronic obstructive pulmonary disease | Male   | Cumulative Cigarettes (5 Years)                     | X        |   | X        |   |
| Chronic obstructive pulmonary disease | Male   | Elevation Over 1500m (proportion)                   |          | X |          | X |
| Chronic obstructive pulmonary disease | Male   | Health System Access 2 (unitless)                   | X        |   |          | X |
| Chronic obstructive pulmonary disease | Male   | Indoor Air Pollution (Biomass Cooking)              | X        |   |          | X |
| Chronic obstructive pulmonary disease | Male   | Indoor Air Pollution (Coal Cooking)                 | X        |   |          | X |
| Chronic obstructive pulmonary disease | Male   | Outdoor Air Pollution (PM2.5)                       | X        |   |          | X |
| Chronic obstructive pulmonary disease | Male   | Smoking Prevalence                                  | X        |   |          | X |
| Chronic obstructive pulmonary disease | Male   | Education (years per capita)                        |          | X |          | X |
| Chronic obstructive pulmonary disease | Male   | LDI (IS per capita)                                 |          | X |          | X |
| Chronic obstructive pulmonary disease | Male   | Sociodemographic Status                             |          |   |          | X |
| Chronic obstructive pulmonary disease | Male   | Elevation 500 to 1500m (proportion)                 |          | X |          |   |
| Chronic obstructive pulmonary disease | Male   | Population Density (over 1000 ppl/sqkm, proportion) |          | X |          |   |
| Chronic obstructive pulmonary disease | Female | Cumulative Cigarettes (10 Years)                    |          |   | X        |   |
| Chronic obstructive pulmonary disease | Female | Cumulative Cigarettes (5 Years)                     | X        |   | X        |   |
| Chronic obstructive pulmonary disease | Female | Elevation Over 1500m (proportion)                   |          | X |          | X |
| Chronic obstructive pulmonary disease | Female | Health System Access 2 (unitless)                   | X        |   |          | X |
| Chronic obstructive pulmonary disease | Female | Indoor Air Pollution (Biomass Cooking)              | X        |   |          | X |
| Chronic obstructive pulmonary disease | Female | Indoor Air Pollution (Coal Cooking)                 | X        |   |          | X |
| Chronic obstructive pulmonary disease | Female | Outdoor Air Pollution (PM2.5)                       | X        |   |          | X |
| Chronic obstructive pulmonary disease | Female | Smoking Prevalence                                  | X        |   |          | X |
| Chronic obstructive pulmonary disease | Female | Education (years per capita)                        |          | X |          | X |
| Chronic obstructive pulmonary disease | Female | LDI (IS per capita)                                 |          | X |          | X |
| Chronic obstructive pulmonary disease | Female | Sociodemographic Status                             |          |   |          | X |
| Chronic obstructive pulmonary disease | Female | Elevation 500 to 1500m (proportion)                 |          | X |          |   |
| Chronic obstructive pulmonary disease | Female | Population Density (over 1000 ppl/sqkm, proportion) |          | X |          |   |
| Pneumoconiosis                        | Male   | Asbestos production (kg) per capita                 | X        |   | X        |   |
| Pneumoconiosis                        | Male   | Coal Production (per capita)                        | X        |   | X        |   |
| Pneumoconiosis                        | Male   | Gold production (kg) per capita                     | X        |   | X        |   |
| Pneumoconiosis                        | Male   | Log-transformed SEV scalar: Pneumocon               |          |   | X        |   |
| Pneumoconiosis                        | Male   | Coal Reserves (teragrams per capita)                |          | X |          | X |
| Pneumoconiosis                        | Male   | Cumulative Cigarettes (5 Years)                     |          | X |          | X |
| Pneumoconiosis                        | Male   | Elevation 500 to 1500m (proportion)                 |          | X |          | X |
| Pneumoconiosis                        | Male   | Elevation Over 1500m (proportion)                   |          | X |          | X |
| Pneumoconiosis                        | Male   | Smoking Prevalence                                  |          | X |          | X |
| Pneumoconiosis                        | Male   | Education (years per capita)                        |          | X |          | X |
| Pneumoconiosis                        | Male   | Health System Access 2 (unitless)                   |          | X |          | X |
| Pneumoconiosis                        | Male   | LDI (IS per capita)                                 |          | X |          | X |
| Pneumoconiosis                        | Male   | Sociodemographic Status                             |          |   |          | X |
| Pneumoconiosis                        | Female | Asbestos production (kg) per capita                 | X        |   | X        |   |
| Pneumoconiosis                        | Female | Coal Production (per capita)                        | X        |   | X        |   |
| Pneumoconiosis                        | Female | Gold production (kg) per capita                     | X        |   | X        |   |
| Pneumoconiosis                        | Female | Log-transformed SEV scalar: Pneumocon               |          |   | X        |   |
| Pneumoconiosis                        | Female | Coal Reserves (teragrams per capita)                |          | X |          | X |
| Pneumoconiosis                        | Female | Cumulative Cigarettes (5 Years)                     |          | X |          | X |
| Pneumoconiosis                        | Female | Elevation 500 to 1500m (proportion)                 |          | X |          | X |
| Pneumoconiosis                        | Female | Elevation Over 1500m (proportion)                   |          | X |          | X |
| Pneumoconiosis                        | Female | Smoking Prevalence                                  |          | X |          | X |
| Pneumoconiosis                        | Female | Education (years per capita)                        |          | X |          | X |
| Pneumoconiosis                        | Female | Health System Access 2 (unitless)                   |          | X |          | X |
| Pneumoconiosis                        | Female | LDI (IS per capita)                                 |          | X |          | X |
| Pneumoconiosis                        | Female | Sociodemographic Status                             |          |   |          | X |
| Silicosis                             | Male   | Asbestos production (binary)                        | X        |   | X        |   |
| Silicosis                             | Male   | Cumulative Cigarettes (5 Years)                     | X        |   | X        |   |
| Silicosis                             | Male   | Health System Access 2 (unitless)                   | X        |   | X        |   |
| Silicosis                             | Male   | Indoor Air Pollution (Coal Cooking)                 | X        |   | X        |   |
| Silicosis                             | Male   | Log-transformed SEV scalar: Silicosis               |          |   | X        |   |
| Silicosis                             | Male   | Population Density (over 1000 ppl/sqkm, proportion) | X        |   | X        |   |
| Silicosis                             | Male   | Smoking Prevalence                                  | X        |   | X        |   |
| Silicosis                             | Male   | Asbestos production (kg) per capita                 |          | X |          | X |
| Silicosis                             | Male   | Elevation 500 to 1500m (proportion)                 |          | X |          | X |
| Silicosis                             | Male   | Elevation Over 1500m (proportion)                   |          | X |          | X |
| Silicosis                             | Male   | Gold production (binary)                            |          | X |          | X |
| Silicosis                             | Male   | Gold production (kg) per capita                     |          | X |          | X |
| Silicosis                             | Male   | Education (years per capita)                        |          | X |          | X |
| Silicosis                             | Male   | LDI (IS per capita)                                 |          | X |          | X |
| Silicosis                             | Male   | Sociodemographic Status                             |          |   |          | X |
| Silicosis                             | Female | Asbestos production (binary)                        | X        |   | X        |   |
| Silicosis                             | Female | Cumulative Cigarettes (5 Years)                     | X        |   | X        |   |
| Silicosis                             | Female | Health System Access 2 (unitless)                   | X        |   | X        |   |
| Silicosis                             | Female | Indoor Air Pollution (Coal Cooking)                 | X        |   | X        |   |
| Silicosis                             | Female | Log-transformed SEV scalar: Silicosis               |          |   | X        |   |
| Silicosis                             | Female | Population Density (over 1000 ppl/sqkm, proportion) | X        |   | X        |   |
| Silicosis                             | Female | Smoking Prevalence                                  | X        |   | X        |   |

Appendix Table 12: Comparison of GBD 2013 and GBD 2015 covariates and level of covariates in cause of death modeling

|                             |        |                                                     | GBD 2013 |   | GBD 2015 |   |
|-----------------------------|--------|-----------------------------------------------------|----------|---|----------|---|
|                             |        |                                                     |          |   |          |   |
| Silicosis                   | Female | Asbestos production (kg) per capita                 |          | X |          | X |
| Silicosis                   | Female | Elevation 500 to 1500m (proportion)                 |          | X |          | X |
| Silicosis                   | Female | Elevation Over 1500m (proportion)                   |          | X |          | X |
| Silicosis                   | Female | Gold production (binary)                            |          | X |          | X |
| Silicosis                   | Female | Gold production (kg) per capita                     |          | X |          | X |
| Silicosis                   | Female | Education (years per capita)                        |          |   | X        | X |
| Silicosis                   | Female | LDI (IS per capita)                                 |          |   | X        | X |
| Silicosis                   | Female | Sociodemographic Status                             |          |   |          | X |
| Asbestosis                  | Male   | Asbestos production (binary)                        | X        |   | X        |   |
| Asbestosis                  | Male   | Cumulative Cigarettes (5 Years)                     | X        |   | X        |   |
| Asbestosis                  | Male   | Health System Access 2 (unitless)                   | X        |   | X        |   |
| Asbestosis                  | Male   | Indoor Air Pollution (Coal Cooking)                 | X        |   | X        |   |
| Asbestosis                  | Male   | Log-transformed SEV scalar: Asbestosis              |          |   | X        |   |
| Asbestosis                  | Male   | Smoking Prevalence                                  | X        |   | X        |   |
| Asbestosis                  | Male   | Asbestos production (kg) per capita                 |          | X |          | X |
| Asbestosis                  | Male   | Elevation 500 to 1500m (proportion)                 |          | X |          | X |
| Asbestosis                  | Male   | Elevation Over 1500m (proportion)                   |          | X |          | X |
| Asbestosis                  | Male   | Gold production (binary)                            |          | X |          | X |
| Asbestosis                  | Male   | Gold production (kg) per capita                     |          | X |          | X |
| Asbestosis                  | Male   | Population Density (over 1000 ppl/sqkm, proportion) |          | X |          | X |
| Asbestosis                  | Male   | Education (years per capita)                        |          |   | X        | X |
| Asbestosis                  | Male   | LDI (IS per capita)                                 |          |   | X        | X |
| Asbestosis                  | Male   | Sociodemographic Status                             |          |   |          | X |
| Asbestosis                  | Female | Asbestos production (binary)                        | X        |   | X        |   |
| Asbestosis                  | Female | Cumulative Cigarettes (5 Years)                     | X        |   | X        |   |
| Asbestosis                  | Female | Health System Access 2 (unitless)                   | X        |   | X        |   |
| Asbestosis                  | Female | Indoor Air Pollution (Coal Cooking)                 | X        |   | X        |   |
| Asbestosis                  | Female | Log-transformed SEV scalar: Asbestosis              |          |   | X        |   |
| Asbestosis                  | Female | Smoking Prevalence                                  | X        |   | X        |   |
| Asbestosis                  | Female | Asbestos production (kg) per capita                 |          | X |          | X |
| Asbestosis                  | Female | Elevation 500 to 1500m (proportion)                 |          | X |          | X |
| Asbestosis                  | Female | Elevation Over 1500m (proportion)                   |          | X |          | X |
| Asbestosis                  | Female | Gold production (binary)                            |          | X |          | X |
| Asbestosis                  | Female | Gold production (kg) per capita                     |          | X |          | X |
| Asbestosis                  | Female | Population Density (over 1000 ppl/sqkm, proportion) |          | X |          | X |
| Asbestosis                  | Female | Education (years per capita)                        |          |   | X        | X |
| Asbestosis                  | Female | LDI (IS per capita)                                 |          |   | X        | X |
| Asbestosis                  | Female | Sociodemographic Status                             |          |   |          | X |
| Coal workers pneumoconiosis | Male   | Asbestos production (binary)                        | X        |   | X        |   |
| Coal workers pneumoconiosis | Male   | Cumulative Cigarettes (5 Years)                     | X        |   | X        |   |
| Coal workers pneumoconiosis | Male   | Health System Access 2 (unitless)                   | X        |   | X        |   |
| Coal workers pneumoconiosis | Male   | Indoor Air Pollution (Coal Cooking)                 | X        |   | X        |   |
| Coal workers pneumoconiosis | Male   | Log-transformed SEV scalar: Coal W                  |          |   | X        |   |
| Coal workers pneumoconiosis | Male   | Smoking Prevalence                                  | X        |   | X        |   |
| Coal workers pneumoconiosis | Male   | Asbestos production (kg) per capita                 |          | X |          | X |
| Coal workers pneumoconiosis | Male   | Elevation 500 to 1500m (proportion)                 |          | X |          | X |
| Coal workers pneumoconiosis | Male   | Elevation Over 1500m (proportion)                   |          | X |          | X |
| Coal workers pneumoconiosis | Male   | Gold production (binary)                            |          | X |          | X |
| Coal workers pneumoconiosis | Male   | Gold production (kg) per capita                     |          | X |          | X |
| Coal workers pneumoconiosis | Male   | Population Density (over 1000 ppl/sqkm, proportion) |          | X |          | X |
| Coal workers pneumoconiosis | Male   | Education (years per capita)                        |          |   | X        | X |
| Coal workers pneumoconiosis | Male   | LDI (IS per capita)                                 |          |   | X        | X |
| Coal workers pneumoconiosis | Male   | Sociodemographic Status                             |          |   |          | X |
| Coal workers pneumoconiosis | Female | Asbestos production (binary)                        | X        |   | X        |   |
| Coal workers pneumoconiosis | Female | Cumulative Cigarettes (5 Years)                     | X        |   | X        |   |
| Coal workers pneumoconiosis | Female | Health System Access 2 (unitless)                   | X        |   | X        |   |
| Coal workers pneumoconiosis | Female | Indoor Air Pollution (Coal Cooking)                 | X        |   | X        |   |
| Coal workers pneumoconiosis | Female | Log-transformed SEV scalar: Coal W                  |          |   | X        |   |
| Coal workers pneumoconiosis | Female | Smoking Prevalence                                  | X        |   | X        |   |
| Coal workers pneumoconiosis | Female | Asbestos production (kg) per capita                 |          | X |          | X |
| Coal workers pneumoconiosis | Female | Elevation 500 to 1500m (proportion)                 |          | X |          | X |
| Coal workers pneumoconiosis | Female | Elevation Over 1500m (proportion)                   |          | X |          | X |
| Coal workers pneumoconiosis | Female | Gold production (binary)                            |          | X |          | X |
| Coal workers pneumoconiosis | Female | Gold production (kg) per capita                     |          | X |          | X |
| Coal workers pneumoconiosis | Female | Population Density (over 1000 ppl/sqkm, proportion) |          | X |          | X |
| Coal workers pneumoconiosis | Female | Education (years per capita)                        |          |   | X        | X |
| Coal workers pneumoconiosis | Female | LDI (IS per capita)                                 |          |   | X        | X |
| Coal workers pneumoconiosis | Female | Sociodemographic Status                             |          |   |          | X |
| Other pneumoconiosis        | Male   | Asbestos production (binary)                        | X        |   | X        |   |
| Other pneumoconiosis        | Male   | Cumulative Cigarettes (5 Years)                     | X        |   | X        |   |
| Other pneumoconiosis        | Male   | Health System Access 2 (unitless)                   | X        |   | X        |   |
| Other pneumoconiosis        | Male   | Indoor Air Pollution (Coal Cooking)                 | X        |   | X        |   |
| Other pneumoconiosis        | Male   | Log-transformed SEV scalar: Oth Pneum               |          |   | X        |   |
| Other pneumoconiosis        | Male   | Smoking Prevalence                                  | X        |   | X        |   |
| Other pneumoconiosis        | Male   | Asbestos production (kg) per capita                 |          | X |          | X |
| Other pneumoconiosis        | Male   | Elevation 500 to 1500m (proportion)                 |          | X |          | X |
| Other pneumoconiosis        | Male   | Elevation Over 1500m (proportion)                   |          | X |          | X |
| Other pneumoconiosis        | Male   | Gold production (binary)                            |          | X |          | X |
| Other pneumoconiosis        | Male   | Gold production (kg) per capita                     |          | X |          | X |
| Other pneumoconiosis        | Male   | Population Density (over 1000 ppl/sqkm, proportion) |          | X |          | X |
| Other pneumoconiosis        | Male   | Education (years per capita)                        |          |   | X        | X |
| Other pneumoconiosis        | Male   | LDI (IS per capita)                                 |          |   | X        | X |
| Other pneumoconiosis        | Male   | Sociodemographic Status                             |          |   |          | X |
| Other pneumoconiosis        | Female | Asbestos production (binary)                        | X        |   | X        |   |
| Other pneumoconiosis        | Female | Cumulative Cigarettes (5 Years)                     | X        |   | X        |   |

Appendix Table 12: Comparison of GBD 2013 and GBD 2015 covariates and level of covariates in cause of death modeling

|                                                     |        |                                                     | GBD 2013 |   |   | GBD 2015 |   |   |
|-----------------------------------------------------|--------|-----------------------------------------------------|----------|---|---|----------|---|---|
|                                                     |        |                                                     |          |   |   |          |   |   |
| Other pneumoconiosis                                | Female | Health System Access 2 (unitless)                   | X        |   |   | X        |   |   |
| Other pneumoconiosis                                | Female | Indoor Air Pollution (Coal Cooking)                 | X        |   |   | X        |   |   |
| Other pneumoconiosis                                | Female | Log-transformed SEV scalar: Oth Pneum               |          |   |   | X        |   |   |
| Other pneumoconiosis                                | Female | Smoking Prevalence                                  | X        |   |   | X        |   |   |
| Other pneumoconiosis                                | Female | Asbestos production (kg) per capita                 |          | X |   |          | X |   |
| Other pneumoconiosis                                | Female | Elevation 500 to 1500m (proportion)                 |          | X |   |          | X |   |
| Other pneumoconiosis                                | Female | Elevation Over 1500m (proportion)                   |          | X |   |          | X |   |
| Other pneumoconiosis                                | Female | Gold production (binary)                            |          | X |   |          | X |   |
| Other pneumoconiosis                                | Female | Gold production (kg) per capita                     |          | X |   |          | X |   |
| Other pneumoconiosis                                | Female | Population Density (over 1000 ppl/sqkm, proportion) |          | X |   |          | X |   |
| Other pneumoconiosis                                | Female | Education (years per capita)                        |          |   | X |          |   | X |
| Other pneumoconiosis                                | Female | LDI (IS per capita)                                 |          |   | X |          |   | X |
| Other pneumoconiosis                                | Female | Sociodemographic Status                             |          |   |   |          |   | X |
| Asthma                                              | Male   | Cumulative Cigarettes (10 Years)                    |          |   |   | X        |   |   |
| Asthma                                              | Male   | Cumulative Cigarettes (5 Years)                     | X        |   |   | X        |   |   |
| Asthma                                              | Male   | Health System Access 2 (unitless)                   | X        |   |   | X        |   |   |
| Asthma                                              | Male   | Log-transformed SEV scalar: Asthma                  |          |   |   | X        |   |   |
| Asthma                                              | Male   | Indoor Air Pollution (Biomass Cooking)              | X        |   |   |          | X |   |
| Asthma                                              | Male   | Indoor Air Pollution (Coal Cooking)                 | X        |   |   |          | X |   |
| Asthma                                              | Male   | Outdoor Air Pollution (PM2.5)                       | X        |   |   |          | X |   |
| Asthma                                              | Male   | Smoking Prevalence                                  | X        |   |   |          | X |   |
| Asthma                                              | Male   | Education (years per capita)                        |          |   | X |          |   | X |
| Asthma                                              | Male   | LDI (IS per capita)                                 |          |   | X |          |   | X |
| Asthma                                              | Male   | Sociodemographic Status                             |          |   |   |          |   | X |
| Asthma                                              | Male   | Elevation 500 to 1500m (proportion)                 |          | X |   |          |   |   |
| Asthma                                              | Male   | Elevation Over 1500m (proportion)                   |          | X |   |          |   |   |
| Asthma                                              | Male   | Population Density (over 1000 ppl/sqkm, proportion) |          | X |   |          |   |   |
| Asthma                                              | Female | Cumulative Cigarettes (10 Years)                    |          |   |   | X        |   |   |
| Asthma                                              | Female | Cumulative Cigarettes (5 Years)                     | X        |   |   | X        |   |   |
| Asthma                                              | Female | Health System Access 2 (unitless)                   | X        |   |   | X        |   |   |
| Asthma                                              | Female | Log-transformed SEV scalar: Asthma                  |          |   |   | X        |   |   |
| Asthma                                              | Female | Indoor Air Pollution (Biomass Cooking)              | X        |   |   |          | X |   |
| Asthma                                              | Female | Indoor Air Pollution (Coal Cooking)                 | X        |   |   |          | X |   |
| Asthma                                              | Female | Outdoor Air Pollution (PM2.5)                       | X        |   |   |          | X |   |
| Asthma                                              | Female | Smoking Prevalence                                  | X        |   |   |          | X |   |
| Asthma                                              | Female | Education (years per capita)                        |          |   | X |          |   | X |
| Asthma                                              | Female | LDI (IS per capita)                                 |          |   | X |          |   | X |
| Asthma                                              | Female | Sociodemographic Status                             |          |   |   |          |   | X |
| Asthma                                              | Female | Elevation 500 to 1500m (proportion)                 |          | X |   |          |   |   |
| Asthma                                              | Female | Elevation Over 1500m (proportion)                   |          | X |   |          |   |   |
| Asthma                                              | Female | Population Density (over 1000 ppl/sqkm, proportion) |          | X |   |          |   |   |
| Interstitial lung disease and pulmonary sarcoidosis | Male   | Cumulative Cigarettes (5 Years)                     | X        |   |   | X        |   |   |
| Interstitial lung disease and pulmonary sarcoidosis | Male   | Health System Access 2 (unitless)                   | X        |   |   | X        |   |   |
| Interstitial lung disease and pulmonary sarcoidosis | Male   | Log-transformed SEV scalar: ILD                     |          |   |   | X        |   |   |
| Interstitial lung disease and pulmonary sarcoidosis | Male   | Smoking Prevalence                                  | X        |   |   | X        |   |   |
| Interstitial lung disease and pulmonary sarcoidosis | Male   | Elevation 500 to 1500m (proportion)                 |          | X |   |          | X |   |
| Interstitial lung disease and pulmonary sarcoidosis | Male   | Elevation Over 1500m (proportion)                   |          | X |   |          | X |   |
| Interstitial lung disease and pulmonary sarcoidosis | Male   | Indoor Air Pollution (Biomass Cooking)              | X        |   |   |          | X |   |
| Interstitial lung disease and pulmonary sarcoidosis | Male   | Indoor Air Pollution (Coal Cooking)                 | X        |   |   |          | X |   |
| Interstitial lung disease and pulmonary sarcoidosis | Male   | Outdoor Air Pollution (PM2.5)                       | X        |   |   |          | X |   |
| Interstitial lung disease and pulmonary sarcoidosis | Male   | Population Density (over 1000 ppl/sqkm, proportion) |          | X |   |          | X |   |
| Interstitial lung disease and pulmonary sarcoidosis | Male   | Education (years per capita)                        |          |   | X |          |   | X |
| Interstitial lung disease and pulmonary sarcoidosis | Male   | LDI (IS per capita)                                 |          |   | X |          |   | X |
| Interstitial lung disease and pulmonary sarcoidosis | Male   | Sociodemographic Status                             |          |   |   |          |   | X |
| Interstitial lung disease and pulmonary sarcoidosis | Female | Cumulative Cigarettes (5 Years)                     | X        |   |   | X        |   |   |
| Interstitial lung disease and pulmonary sarcoidosis | Female | Health System Access 2 (unitless)                   | X        |   |   | X        |   |   |
| Interstitial lung disease and pulmonary sarcoidosis | Female | Indoor Air Pollution (Biomass Cooking)              | X        |   |   | X        |   |   |
| Interstitial lung disease and pulmonary sarcoidosis | Female | Indoor Air Pollution (Coal Cooking)                 | X        |   |   | X        |   |   |
| Interstitial lung disease and pulmonary sarcoidosis | Female | Log-transformed SEV scalar: ILD                     |          |   |   | X        |   |   |
| Interstitial lung disease and pulmonary sarcoidosis | Female | Outdoor Air Pollution (PM2.5)                       | X        |   |   |          | X |   |
| Interstitial lung disease and pulmonary sarcoidosis | Female | Smoking Prevalence                                  | X        |   |   |          | X |   |
| Interstitial lung disease and pulmonary sarcoidosis | Female | Elevation 500 to 1500m (proportion)                 |          | X |   |          | X |   |
| Interstitial lung disease and pulmonary sarcoidosis | Female | Elevation Over 1500m (proportion)                   |          | X |   |          | X |   |
| Interstitial lung disease and pulmonary sarcoidosis | Female | Indoor Air Pollution (Biomass Cooking)              | X        |   |   |          | X |   |
| Interstitial lung disease and pulmonary sarcoidosis | Female | Indoor Air Pollution (Coal Cooking)                 | X        |   |   |          | X |   |
| Interstitial lung disease and pulmonary sarcoidosis | Female | Outdoor Air Pollution (PM2.5)                       | X        |   |   |          | X |   |
| Interstitial lung disease and pulmonary sarcoidosis | Female | Population Density (over 1000 ppl/sqkm, proportion) |          | X |   |          | X |   |
| Interstitial lung disease and pulmonary sarcoidosis | Female | Education (years per capita)                        |          |   | X |          |   | X |
| Interstitial lung disease and pulmonary sarcoidosis | Female | LDI (IS per capita)                                 |          |   | X |          |   | X |
| Interstitial lung disease and pulmonary sarcoidosis | Female | Sociodemographic Status                             |          |   |   |          |   | X |
| Other chronic respiratory diseases                  | Male   | Cumulative Cigarettes (5 Years)                     | X        |   |   | X        |   |   |
| Other chronic respiratory diseases                  | Male   | Health System Access 2 (unitless)                   | X        |   |   | X        |   |   |
| Other chronic respiratory diseases                  | Male   | Indoor Air Pollution (Biomass Cooking)              | X        |   |   | X        |   |   |
| Other chronic respiratory diseases                  | Male   | Indoor Air Pollution (Coal Cooking)                 | X        |   |   | X        |   |   |
| Other chronic respiratory diseases                  | Male   | Log-transformed SEV scalar: Oth Resp                |          |   |   | X        |   |   |
| Other chronic respiratory diseases                  | Male   | Outdoor Air Pollution (PM2.5)                       | X        |   |   |          | X |   |
| Other chronic respiratory diseases                  | Male   | Smoking Prevalence                                  | X        |   |   |          | X |   |
| Other chronic respiratory diseases                  | Male   | Elevation 500 to 1500m (proportion)                 |          | X |   |          | X |   |
| Other chronic respiratory diseases                  | Male   | Elevation Over 1500m (proportion)                   |          | X |   |          | X |   |
| Other chronic respiratory diseases                  | Male   | Population Density (over 1000 ppl/sqkm, proportion) |          | X |   |          | X |   |
| Other chronic respiratory diseases                  | Male   | Education (years per capita)                        |          |   | X |          |   | X |
| Other chronic respiratory diseases                  | Male   | LDI (IS per capita)                                 |          |   | X |          |   | X |
| Other chronic respiratory diseases                  | Male   | Sociodemographic Status                             |          |   |   |          |   | X |
| Other chronic respiratory diseases                  | Female | Cumulative Cigarettes (5 Years)                     | X        |   |   | X        |   |   |
| Other chronic respiratory diseases                  | Female | Health System Access 2 (unitless)                   | X        |   |   | X        |   |   |

Appendix Table 12: Comparison of GBD 2013 and GBD 2015 covariates and level of covariates in cause of death modeling

|                                            |        |                                                     | GBD 2013 |   | GBD 2015 |   |
|--------------------------------------------|--------|-----------------------------------------------------|----------|---|----------|---|
|                                            |        |                                                     |          |   |          |   |
| Other chronic respiratory diseases         | Female | Indoor Air Pollution (Biomass Cooking)              | X        |   | X        |   |
| Other chronic respiratory diseases         | Female | Indoor Air Pollution (Coal Cooking)                 | X        |   | X        |   |
| Other chronic respiratory diseases         | Female | Log-transformed SEV scalar: Oth Resp                |          |   | X        |   |
| Other chronic respiratory diseases         | Female | Outdoor Air Pollution (PM2.5)                       | X        |   | X        |   |
| Other chronic respiratory diseases         | Female | Smoking Prevalence                                  | X        |   | X        |   |
| Other chronic respiratory diseases         | Female | Elevation 500 to 1500m (proportion)                 |          | X |          | X |
| Other chronic respiratory diseases         | Female | Elevation Over 1500m (proportion)                   |          | X |          | X |
| Other chronic respiratory diseases         | Female | Population Density (over 1000 ppl/sqkm, proportion) |          | X |          | X |
| Other chronic respiratory diseases         | Female | Education (years per capita)                        |          | X |          | X |
| Other chronic respiratory diseases         | Female | LDI (IS per capita)                                 |          | X |          | X |
| Other chronic respiratory diseases         | Female | Sociodemographic Status                             |          |   |          | X |
| Cirrhosis and other chronic liver diseases | Male   | Alcohol (litres per capita)                         | X        |   | X        |   |
| Cirrhosis and other chronic liver diseases | Male   | Health System Access 2 (unitless)                   | X        |   | X        |   |
| Cirrhosis and other chronic liver diseases | Male   | Hepatitis B (HBsAg) Seroprevalence (GBD 2015)       |          |   | X        |   |
| Cirrhosis and other chronic liver diseases | Male   | Hepatitis C (IgG) Seroprevalence (GBD 2015)         |          |   | X        |   |
| Cirrhosis and other chronic liver diseases | Male   | Schistosomiasis Prevalence (proportion)             | X        |   | X        |   |
| Cirrhosis and other chronic liver diseases | Male   | Diabetes Age-Standardised Prevalence (proportion)   |          | X |          | X |
| Cirrhosis and other chronic liver diseases | Male   | Mean BMI                                            |          | X |          | X |
| Cirrhosis and other chronic liver diseases | Male   | Education (years per capita)                        |          | X |          | X |
| Cirrhosis and other chronic liver diseases | Male   | LDI (IS per capita)                                 |          | X |          | X |
| Cirrhosis and other chronic liver diseases | Male   | Sociodemographic Status                             |          |   |          | X |
| Cirrhosis and other chronic liver diseases | Male   | Hepatitis B Prevalence (proportion)                 | X        |   |          |   |
| Cirrhosis and other chronic liver diseases | Male   | Hepatitis C Prevalence (proportion)                 | X        |   |          |   |
| Cirrhosis and other chronic liver diseases | Female | Alcohol (litres per capita)                         | X        |   | X        |   |
| Cirrhosis and other chronic liver diseases | Female | Health System Access 2 (unitless)                   | X        |   | X        |   |
| Cirrhosis and other chronic liver diseases | Female | Hepatitis B (HBsAg) Seroprevalence (GBD 2015)       |          |   | X        |   |
| Cirrhosis and other chronic liver diseases | Female | Hepatitis C (IgG) Seroprevalence (GBD 2015)         |          |   | X        |   |
| Cirrhosis and other chronic liver diseases | Female | Schistosomiasis Prevalence (proportion)             | X        |   | X        |   |
| Cirrhosis and other chronic liver diseases | Female | Diabetes Age-Standardised Prevalence (proportion)   |          | X |          | X |
| Cirrhosis and other chronic liver diseases | Female | Mean BMI                                            |          | X |          | X |
| Cirrhosis and other chronic liver diseases | Female | Education (years per capita)                        |          | X |          | X |
| Cirrhosis and other chronic liver diseases | Female | LDI (IS per capita)                                 |          | X |          | X |
| Cirrhosis and other chronic liver diseases | Female | Sociodemographic Status                             |          |   |          | X |
| Cirrhosis and other chronic liver diseases | Female | Hepatitis B Prevalence (proportion)                 | X        |   |          |   |
| Cirrhosis and other chronic liver diseases | Female | Hepatitis C Prevalence (proportion)                 | X        |   |          |   |
| Digestive diseases                         | Male   | Alcohol (litres per capita)                         | X        |   | X        |   |
| Digestive diseases                         | Male   | Cumulative Cigarettes (5 Years)                     | X        |   | X        |   |
| Digestive diseases                         | Male   | Health System Access (capped)                       | X        |   | X        |   |
| Digestive diseases                         | Male   | Sanitation (proportion with access)                 | X        |   | X        |   |
| Digestive diseases                         | Male   | Malnutrition (proportion <2SD weight for age)       |          | X |          | X |
| Digestive diseases                         | Male   | fruits adjusted(g)                                  |          |   |          | X |
| Digestive diseases                         | Male   | red meats adjusted(g)                               |          |   |          | X |
| Digestive diseases                         | Male   | Education (years per capita)                        |          | X |          | X |
| Digestive diseases                         | Male   | LDI (IS per capita)                                 |          |   |          | X |
| Digestive diseases                         | Male   | Sociodemographic Status                             |          |   |          | X |
| Digestive diseases                         | Male   | Fruits (kcal per capita)                            |          | X |          |   |
| Digestive diseases                         | Male   | Red Meat (kcal per capita)                          |          | X |          |   |
| Digestive diseases                         | Female | Alcohol (litres per capita)                         | X        |   | X        |   |
| Digestive diseases                         | Female | Cumulative Cigarettes (5 Years)                     | X        |   | X        |   |
| Digestive diseases                         | Female | Health System Access (capped)                       | X        |   | X        |   |
| Digestive diseases                         | Female | Sanitation (proportion with access)                 | X        |   | X        |   |
| Digestive diseases                         | Female | Malnutrition (proportion <2SD weight for age)       |          | X |          | X |
| Digestive diseases                         | Female | fruits adjusted(g)                                  |          |   |          | X |
| Digestive diseases                         | Female | red meats adjusted(g)                               |          |   |          | X |
| Digestive diseases                         | Female | Education (years per capita)                        |          | X |          | X |
| Digestive diseases                         | Female | LDI (IS per capita)                                 |          |   |          | X |
| Digestive diseases                         | Female | Sociodemographic Status                             |          |   |          | X |
| Digestive diseases                         | Female | Fruits (kcal per capita)                            |          | X |          |   |
| Digestive diseases                         | Female | Red Meat (kcal per capita)                          |          | X |          |   |
| Peptic ulcer disease                       | Male   | Alcohol (litres per capita)                         | X        |   | X        |   |
| Peptic ulcer disease                       | Male   | Cumulative Cigarettes (10 Years)                    | X        |   | X        |   |
| Peptic ulcer disease                       | Male   | Cumulative Cigarettes (5 Years)                     | X        |   | X        |   |
| Peptic ulcer disease                       | Male   | Smoking Prevalence                                  | X        |   | X        |   |
| Peptic ulcer disease                       | Male   | Health System Access (capped)                       |          | X |          | X |
| Peptic ulcer disease                       | Male   | Sanitation (proportion with access)                 |          | X |          | X |
| Peptic ulcer disease                       | Male   | vegetables adjusted(g)                              |          |   |          | X |
| Peptic ulcer disease                       | Male   | LDI (IS per capita)                                 |          | X |          | X |
| Peptic ulcer disease                       | Male   | Maternal education (years per capita)               |          |   |          | X |
| Peptic ulcer disease                       | Male   | Sociodemographic Status                             |          |   |          | X |
| Peptic ulcer disease                       | Male   | Education (years per capita)                        |          | X |          |   |
| Peptic ulcer disease                       | Male   | Vegetables (kcal per capita)                        |          | X |          |   |
| Peptic ulcer disease                       | Female | Alcohol (litres per capita)                         | X        |   | X        |   |
| Peptic ulcer disease                       | Female | Cumulative Cigarettes (10 Years)                    | X        |   | X        |   |
| Peptic ulcer disease                       | Female | Cumulative Cigarettes (5 Years)                     | X        |   | X        |   |
| Peptic ulcer disease                       | Female | Smoking Prevalence                                  | X        |   | X        |   |
| Peptic ulcer disease                       | Female | Health System Access (capped)                       |          | X |          | X |
| Peptic ulcer disease                       | Female | Sanitation (proportion with access)                 |          | X |          | X |
| Peptic ulcer disease                       | Female | vegetables adjusted(g)                              |          |   |          | X |
| Peptic ulcer disease                       | Female | LDI (IS per capita)                                 |          | X |          | X |
| Peptic ulcer disease                       | Female | Maternal education (years per capita)               |          |   |          | X |
| Peptic ulcer disease                       | Female | Sociodemographic Status                             |          |   |          | X |
| Peptic ulcer disease                       | Female | Education (years per capita)                        |          | X |          |   |
| Peptic ulcer disease                       | Female | Vegetables (kcal per capita)                        |          | X |          |   |
| Gastritis and duodenitis                   | Male   | Alcohol (litres per capita)                         | X        |   | X        |   |
| Gastritis and duodenitis                   | Male   | Cumulative Cigarettes (10 Years)                    | X        |   | X        |   |



Appendix Table 12: Comparison of GBD 2013 and GBD 2015 covariates and level of covariates in cause of death modeling

|                                            |        |                                                | GBD 2013 |   |   | GBD 2015 |   |   |
|--------------------------------------------|--------|------------------------------------------------|----------|---|---|----------|---|---|
|                                            |        |                                                |          |   |   |          |   |   |
| Gastritis and duodenitis                   | Male   | Cumulative Cigarettes (5 Years)                | X        |   |   | X        |   |   |
| Gastritis and duodenitis                   | Male   | Smoking Prevalence                             | X        |   |   | X        |   |   |
| Gastritis and duodenitis                   | Male   | Health System Access (capped)                  |          | X |   |          | X |   |
| Gastritis and duodenitis                   | Male   | Improved Water Source (proportion with access) |          | X |   |          | X |   |
| Gastritis and duodenitis                   | Male   | Sanitation (proportion with access)            |          | X |   |          | X |   |
| Gastritis and duodenitis                   | Male   | vegetables adjusted(g)                         |          |   |   |          | X |   |
| Gastritis and duodenitis                   | Male   | Education (years per capita)                   |          |   | X |          |   | X |
| Gastritis and duodenitis                   | Male   | LDI (IS per capita)                            |          |   | X |          |   | X |
| Gastritis and duodenitis                   | Male   | Sociodemographic Status                        |          |   |   |          |   | X |
| Gastritis and duodenitis                   | Male   | Vegetables (kcal per capita)                   |          | X |   |          |   |   |
| Gastritis and duodenitis                   | Female | Alcohol (litres per capita)                    | X        |   |   | X        |   |   |
| Gastritis and duodenitis                   | Female | Cumulative Cigarettes (10 Years)               | X        |   |   | X        |   |   |
| Gastritis and duodenitis                   | Female | Cumulative Cigarettes (5 Years)                | X        |   |   | X        |   |   |
| Gastritis and duodenitis                   | Female | Smoking Prevalence                             | X        |   |   | X        |   |   |
| Gastritis and duodenitis                   | Female | Health System Access (capped)                  |          | X |   |          | X |   |
| Gastritis and duodenitis                   | Female | Improved Water Source (proportion with access) |          | X |   |          | X |   |
| Gastritis and duodenitis                   | Female | Sanitation (proportion with access)            |          | X |   |          | X |   |
| Gastritis and duodenitis                   | Female | vegetables adjusted(g)                         |          |   |   |          | X |   |
| Gastritis and duodenitis                   | Female | Education (years per capita)                   |          |   | X |          |   | X |
| Gastritis and duodenitis                   | Female | LDI (IS per capita)                            |          |   | X |          |   | X |
| Gastritis and duodenitis                   | Female | Sociodemographic Status                        |          |   |   |          |   | X |
| Gastritis and duodenitis                   | Female | Vegetables (kcal per capita)                   |          | X |   |          |   |   |
| Appendicitis                               | Male   | Health System Access (capped)                  |          | X |   |          | X |   |
| Appendicitis                               | Male   | fruits adjusted(g)                             |          |   |   |          | X |   |
| Appendicitis                               | Male   | vegetables adjusted(g)                         |          |   |   |          | X |   |
| Appendicitis                               | Male   | Education (years per capita)                   |          |   | X |          |   | X |
| Appendicitis                               | Male   | LDI (IS per capita)                            |          |   | X |          |   | X |
| Appendicitis                               | Male   | Sociodemographic Status                        |          |   |   |          |   | X |
| Appendicitis                               | Male   | Fruits (kcal per capita)                       |          | X |   |          |   |   |
| Appendicitis                               | Male   | Vegetables (kcal per capita)                   |          | X |   |          |   |   |
| Appendicitis                               | Female | Health System Access (capped)                  |          | X |   |          | X |   |
| Appendicitis                               | Female | fruits adjusted(g)                             |          |   |   |          | X |   |
| Appendicitis                               | Female | vegetables adjusted(g)                         |          |   |   |          | X |   |
| Appendicitis                               | Female | Education (years per capita)                   |          |   | X |          |   | X |
| Appendicitis                               | Female | LDI (IS per capita)                            |          |   | X |          |   | X |
| Appendicitis                               | Female | Sociodemographic Status                        |          |   |   |          |   | X |
| Appendicitis                               | Female | Fruits (kcal per capita)                       |          | X |   |          |   |   |
| Appendicitis                               | Female | Vegetables (kcal per capita)                   |          | X |   |          |   |   |
| Paralytic ileus and intestinal obstruction | Male   | Health System Access (capped)                  | X        |   |   | X        |   |   |
| Paralytic ileus and intestinal obstruction | Male   | fruits adjusted(g)                             |          |   |   |          | X |   |
| Paralytic ileus and intestinal obstruction | Male   | vegetables adjusted(g)                         |          |   |   |          | X |   |
| Paralytic ileus and intestinal obstruction | Male   | Education (years per capita)                   |          |   | X |          |   | X |
| Paralytic ileus and intestinal obstruction | Male   | LDI (IS per capita)                            |          |   | X |          |   | X |
| Paralytic ileus and intestinal obstruction | Male   | Sociodemographic Status                        |          |   |   |          |   | X |
| Paralytic ileus and intestinal obstruction | Male   | Fruits (kcal per capita)                       |          | X |   |          |   |   |
| Paralytic ileus and intestinal obstruction | Male   | Vegetables (kcal per capita)                   |          | X |   |          |   |   |
| Paralytic ileus and intestinal obstruction | Female | Health System Access (capped)                  | X        |   |   | X        |   |   |
| Paralytic ileus and intestinal obstruction | Female | fruits adjusted(g)                             |          |   |   |          | X |   |
| Paralytic ileus and intestinal obstruction | Female | vegetables adjusted(g)                         |          |   |   |          | X |   |
| Paralytic ileus and intestinal obstruction | Female | Education (years per capita)                   |          |   | X |          |   | X |
| Paralytic ileus and intestinal obstruction | Female | LDI (IS per capita)                            |          |   | X |          |   | X |
| Paralytic ileus and intestinal obstruction | Female | Sociodemographic Status                        |          |   |   |          |   | X |
| Paralytic ileus and intestinal obstruction | Female | Fruits (kcal per capita)                       |          | X |   |          |   |   |
| Paralytic ileus and intestinal obstruction | Female | Vegetables (kcal per capita)                   |          | X |   |          |   |   |
| Inguinal, femoral, and abdominal hernia    | Male   | Health System Access (capped)                  |          | X |   |          | X |   |
| Inguinal, femoral, and abdominal hernia    | Male   | Education (years per capita)                   |          |   | X |          |   | X |
| Inguinal, femoral, and abdominal hernia    | Male   | LDI (IS per capita)                            |          |   | X |          |   | X |
| Inguinal, femoral, and abdominal hernia    | Male   | Sociodemographic Status                        |          |   |   |          |   | X |
| Inguinal, femoral, and abdominal hernia    | Female | Health System Access (capped)                  |          | X |   |          | X |   |
| Inguinal, femoral, and abdominal hernia    | Female | Education (years per capita)                   |          |   | X |          |   | X |
| Inguinal, femoral, and abdominal hernia    | Female | LDI (IS per capita)                            |          |   | X |          |   | X |
| Inguinal, femoral, and abdominal hernia    | Female | Sociodemographic Status                        |          |   |   |          |   | X |
| Inflammatory bowel disease                 | Male   | Animal Fats (kcal per capita)                  | X        |   |   | X        |   |   |
| Inflammatory bowel disease                 | Male   | fruits adjusted(g)                             |          |   |   |          | X |   |
| Inflammatory bowel disease                 | Male   | red meats adjusted(g)                          |          |   |   |          | X |   |
| Inflammatory bowel disease                 | Male   | vegetables adjusted(g)                         |          |   |   |          | X |   |
| Inflammatory bowel disease                 | Male   | Health System Access (capped)                  |          | X |   |          |   | X |
| Inflammatory bowel disease                 | Male   | Latitude 15 to 30 (proportion)                 |          |   | X |          |   | X |
| Inflammatory bowel disease                 | Male   | Latitude 30 to 45 (proportion)                 |          |   | X |          |   | X |
| Inflammatory bowel disease                 | Male   | Latitude Over 45 (proportion)                  |          |   | X |          |   | X |
| Inflammatory bowel disease                 | Male   | Education (years per capita)                   |          |   | X |          |   | X |
| Inflammatory bowel disease                 | Male   | LDI (IS per capita)                            |          |   | X |          |   | X |
| Inflammatory bowel disease                 | Male   | Sociodemographic Status                        |          |   |   |          |   | X |
| Inflammatory bowel disease                 | Male   | Fruits (kcal per capita)                       | X        |   |   |          |   |   |
| Inflammatory bowel disease                 | Male   | Red Meat (kcal per capita)                     | X        |   |   |          |   |   |
| Inflammatory bowel disease                 | Male   | Vegetables (kcal per capita)                   | X        |   |   |          |   |   |
| Inflammatory bowel disease                 | Female | Animal Fats (kcal per capita)                  | X        |   |   | X        |   |   |
| Inflammatory bowel disease                 | Female | fruits adjusted(g)                             |          |   |   |          | X |   |
| Inflammatory bowel disease                 | Female | red meats adjusted(g)                          |          |   |   |          | X |   |
| Inflammatory bowel disease                 | Female | vegetables adjusted(g)                         |          |   |   |          | X |   |
| Inflammatory bowel disease                 | Female | Health System Access (capped)                  |          | X |   |          |   | X |
| Inflammatory bowel disease                 | Female | Latitude 15 to 30 (proportion)                 |          |   | X |          |   | X |
| Inflammatory bowel disease                 | Female | Latitude 30 to 45 (proportion)                 |          |   | X |          |   | X |
| Inflammatory bowel disease                 | Female | Latitude Over 45 (proportion)                  |          |   | X |          |   | X |
| Inflammatory bowel disease                 | Female | Education (years per capita)                   |          |   | X |          |   | X |

Appendix Table 12: Comparison of GBD 2013 and GBD 2015 covariates and level of covariates in cause of death modeling

|                                  |        |                                                   | GBD 2013 |   | GBD 2015 |   |
|----------------------------------|--------|---------------------------------------------------|----------|---|----------|---|
|                                  |        |                                                   |          |   |          |   |
| Inflammatory bowel disease       | Female | LDI (IS per capita)                               |          | X |          | X |
| Inflammatory bowel disease       | Female | Sociodemographic Status                           |          |   |          | X |
| Inflammatory bowel disease       | Female | Fruits (kcal per capita)                          | X        |   |          |   |
| Inflammatory bowel disease       | Female | Red Meat (kcal per capita)                        | X        |   |          |   |
| Inflammatory bowel disease       | Female | Vegetables (kcal per capita)                      | X        |   |          |   |
| Vascular intestinal disorders    | Male   | Cholesterol (total, mean per capita)              | X        |   | X        |   |
| Vascular intestinal disorders    | Male   | Diabetes Age-Standardised Prevalence (proportion) | X        |   | X        |   |
| Vascular intestinal disorders    | Male   | Diabetes Fasting Plasma Glucose (mmol/L)          | X        |   | X        |   |
| Vascular intestinal disorders    | Male   | Systolic Blood Pressure (mmHg)                    | X        |   | X        |   |
| Vascular intestinal disorders    | Male   | Alcohol (litres per capita)                       |          | X |          | X |
| Vascular intestinal disorders    | Male   | Animal Fats (kcal per capita)                     |          | X |          | X |
| Vascular intestinal disorders    | Male   | Health System Access (capped)                     |          | X |          | X |
| Vascular intestinal disorders    | Male   | fruits adjusted(g)                                |          |   |          | X |
| Vascular intestinal disorders    | Male   | vegetables adjusted(g)                            |          |   |          | X |
| Vascular intestinal disorders    | Male   | Education (years per capita)                      |          | X |          | X |
| Vascular intestinal disorders    | Male   | LDI (IS per capita)                               |          | X |          | X |
| Vascular intestinal disorders    | Male   | Latitude Over 45 (proportion)                     |          | X |          | X |
| Vascular intestinal disorders    | Male   | Sociodemographic Status                           |          |   |          | X |
| Vascular intestinal disorders    | Male   | Diabetes Age-Specific Prevalence (proportion)     | X        |   |          |   |
| Vascular intestinal disorders    | Male   | Fruits (kcal per capita)                          |          | X |          |   |
| Vascular intestinal disorders    | Male   | Vegetables (kcal per capita)                      |          | X |          |   |
| Vascular intestinal disorders    | Female | Cholesterol (total, mean per capita)              | X        |   | X        |   |
| Vascular intestinal disorders    | Female | Diabetes Age-Standardised Prevalence (proportion) | X        |   | X        |   |
| Vascular intestinal disorders    | Female | Diabetes Fasting Plasma Glucose (mmol/L)          | X        |   | X        |   |
| Vascular intestinal disorders    | Female | Systolic Blood Pressure (mmHg)                    | X        |   | X        |   |
| Vascular intestinal disorders    | Female | Alcohol (litres per capita)                       |          | X |          | X |
| Vascular intestinal disorders    | Female | Animal Fats (kcal per capita)                     |          | X |          | X |
| Vascular intestinal disorders    | Female | Health System Access (capped)                     |          | X |          | X |
| Vascular intestinal disorders    | Female | fruits adjusted(g)                                |          |   |          | X |
| Vascular intestinal disorders    | Female | vegetables adjusted(g)                            |          |   |          | X |
| Vascular intestinal disorders    | Female | Education (years per capita)                      |          | X |          | X |
| Vascular intestinal disorders    | Female | LDI (IS per capita)                               |          | X |          | X |
| Vascular intestinal disorders    | Female | Latitude Over 45 (proportion)                     |          | X |          | X |
| Vascular intestinal disorders    | Female | Sociodemographic Status                           |          |   |          | X |
| Vascular intestinal disorders    | Female | Diabetes Age-Specific Prevalence (proportion)     | X        |   |          |   |
| Vascular intestinal disorders    | Female | Fruits (kcal per capita)                          |          | X |          |   |
| Vascular intestinal disorders    | Female | Vegetables (kcal per capita)                      |          | X |          |   |
| Gallbladder and biliary diseases | Male   | Animal Fats (kcal per capita)                     | X        |   | X        |   |
| Gallbladder and biliary diseases | Male   | Health System Access (capped)                     | X        |   | X        |   |
| Gallbladder and biliary diseases | Male   | Mean BMI                                          | X        |   | X        |   |
| Gallbladder and biliary diseases | Male   | Alcohol (litres per capita)                       |          | X |          | X |
| Gallbladder and biliary diseases | Male   | Population Over 65 (proportion)                   |          | X |          | X |
| Gallbladder and biliary diseases | Male   | red meats adjusted(g)                             |          |   |          | X |
| Gallbladder and biliary diseases | Male   | Education (years per capita)                      |          | X |          | X |
| Gallbladder and biliary diseases | Male   | LDI (IS per capita)                               |          | X |          | X |
| Gallbladder and biliary diseases | Male   | Sociodemographic Status                           |          |   |          | X |
| Gallbladder and biliary diseases | Male   | Red Meat (kcal per capita)                        |          | X |          |   |
| Gallbladder and biliary diseases | Female | Animal Fats (kcal per capita)                     | X        |   | X        |   |
| Gallbladder and biliary diseases | Female | Health System Access (capped)                     | X        |   | X        |   |
| Gallbladder and biliary diseases | Female | Mean BMI                                          | X        |   | X        |   |
| Gallbladder and biliary diseases | Female | Alcohol (litres per capita)                       |          | X |          | X |
| Gallbladder and biliary diseases | Female | Population Over 65 (proportion)                   |          | X |          | X |
| Gallbladder and biliary diseases | Female | red meats adjusted(g)                             |          |   |          | X |
| Gallbladder and biliary diseases | Female | Education (years per capita)                      |          | X |          | X |
| Gallbladder and biliary diseases | Female | LDI (IS per capita)                               |          | X |          | X |
| Gallbladder and biliary diseases | Female | Sociodemographic Status                           |          |   |          | X |
| Gallbladder and biliary diseases | Female | Red Meat (kcal per capita)                        |          | X |          |   |
| Pancreatitis                     | Male   | Alcohol (litres per capita)                       | X        |   | X        |   |
| Pancreatitis                     | Male   | Log-transformed SEV scalar: Pancreatit            |          |   | X        |   |
| Pancreatitis                     | Male   | Health System Access (capped)                     |          | X |          | X |
| Pancreatitis                     | Male   | Mean BMI                                          |          | X |          | X |
| Pancreatitis                     | Male   | Education (years per capita)                      |          | X |          | X |
| Pancreatitis                     | Male   | LDI (IS per capita)                               |          | X |          | X |
| Pancreatitis                     | Male   | Sociodemographic Status                           |          |   |          | X |
| Pancreatitis                     | Female | Alcohol (litres per capita)                       | X        |   | X        |   |
| Pancreatitis                     | Female | Log-transformed SEV scalar: Pancreatit            |          |   | X        |   |
| Pancreatitis                     | Female | Health System Access (capped)                     |          | X |          | X |
| Pancreatitis                     | Female | Mean BMI                                          |          | X |          | X |
| Pancreatitis                     | Female | Education (years per capita)                      |          | X |          | X |
| Pancreatitis                     | Female | LDI (IS per capita)                               |          | X |          | X |
| Pancreatitis                     | Female | Sociodemographic Status                           |          |   |          | X |
| Other digestive diseases         | Male   | Alcohol (litres per capita)                       | X        |   | X        |   |
| Other digestive diseases         | Male   | Cumulative Cigarettes (10 Years)                  | X        |   | X        |   |
| Other digestive diseases         | Male   | Cumulative Cigarettes (5 Years)                   | X        |   | X        |   |
| Other digestive diseases         | Male   | Smoking Prevalence                                | X        |   | X        |   |
| Other digestive diseases         | Male   | Animal Fats (kcal per capita)                     |          | X |          | X |
| Other digestive diseases         | Male   | Diabetes Age-Standardised Prevalence (proportion) |          | X |          | X |
| Other digestive diseases         | Male   | Health System Access 2 (unitless)                 |          | X |          | X |
| Other digestive diseases         | Male   | Improved Water Source (proportion with access)    |          | X |          | X |
| Other digestive diseases         | Male   | Malnutrition (proportion <2SD weight for age)     |          | X |          | X |
| Other digestive diseases         | Male   | Mean BMI                                          |          | X |          | X |
| Other digestive diseases         | Male   | Sanitation (proportion with access)               |          | X |          | X |
| Other digestive diseases         | Male   | fruits adjusted(g)                                |          |   |          | X |
| Other digestive diseases         | Male   | red meats adjusted(g)                             |          |   |          | X |
| Other digestive diseases         | Male   | vegetables adjusted(g)                            |          |   |          | X |

Appendix Table 12: Comparison of GBD 2013 and GBD 2015 covariates and level of covariates in cause of death modeling

|                          |        |                                                   | GBD 2013 |   | GBD 2015 |   |
|--------------------------|--------|---------------------------------------------------|----------|---|----------|---|
|                          |        |                                                   |          |   |          |   |
| Other digestive diseases | Male   | Education (years per capita)                      |          | X |          | X |
| Other digestive diseases | Male   | LDI (IS per capita)                               |          | X |          | X |
| Other digestive diseases | Male   | Sociodemographic Status                           |          |   |          | X |
| Other digestive diseases | Male   | Fruits (kcal per capita)                          | X        |   |          |   |
| Other digestive diseases | Male   | Red Meat (kcal per capita)                        | X        |   |          |   |
| Other digestive diseases | Male   | Vegetables (kcal per capita)                      | X        |   |          |   |
| Other digestive diseases | Female | Alcohol (litres per capita)                       | X        |   | X        |   |
| Other digestive diseases | Female | Cumulative Cigarettes (10 Years)                  | X        |   | X        |   |
| Other digestive diseases | Female | Cumulative Cigarettes (5 Years)                   | X        |   | X        |   |
| Other digestive diseases | Female | Smoking Prevalence                                | X        |   | X        |   |
| Other digestive diseases | Female | Animal Fats (kcal per capita)                     |          | X |          | X |
| Other digestive diseases | Female | Diabetes Age-Standardised Prevalence (proportion) |          | X |          | X |
| Other digestive diseases | Female | Health System Access 2 (unitless)                 |          | X |          | X |
| Other digestive diseases | Female | Improved Water Source (proportion with access)    |          | X |          | X |
| Other digestive diseases | Female | Malnutrition (proportion <2SD weight for age)     |          | X |          | X |
| Other digestive diseases | Female | Mean BMI                                          |          | X |          | X |
| Other digestive diseases | Female | Sanitation (proportion with access)               |          | X |          | X |
| Other digestive diseases | Female | fruits adjusted(g)                                |          |   |          | X |
| Other digestive diseases | Female | red meats adjusted(g)                             |          |   |          | X |
| Other digestive diseases | Female | vegetables adjusted(g)                            |          |   |          | X |
| Other digestive diseases | Female | Education (years per capita)                      |          | X |          | X |
| Other digestive diseases | Female | LDI (IS per capita)                               |          | X |          | X |
| Other digestive diseases | Female | Sociodemographic Status                           |          |   |          | X |
| Other digestive diseases | Female | Fruits (kcal per capita)                          |          | X |          |   |
| Other digestive diseases | Female | Red Meat (kcal per capita)                        |          | X |          |   |
| Other digestive diseases | Female | Vegetables (kcal per capita)                      |          | X |          |   |
| Parkinson disease        | Male   | Cumulative Cigarettes (10 Years)                  | X        |   | X        |   |
| Parkinson disease        | Male   | Cumulative Cigarettes (5 Years)                   | X        |   | X        |   |
| Parkinson disease        | Male   | Health System Access (capped)                     | X        |   | X        |   |
| Parkinson disease        | Male   | Absolute value of average latitude                |          | X |          | X |
| Parkinson disease        | Male   | Cholesterol (total, mean per capita)              |          | X |          | X |
| Parkinson disease        | Male   | Fruits (kcal per capita)                          |          | X |          | X |
| Parkinson disease        | Male   | Improved Water Source (proportion with access)    |          | X |          | X |
| Parkinson disease        | Male   | Sanitation (proportion with access)               |          | X |          | X |
| Parkinson disease        | Male   | Education (years per capita)                      |          | X |          | X |
| Parkinson disease        | Male   | LDI (IS per capita)                               |          | X |          | X |
| Parkinson disease        | Male   | Sociodemographic Status                           |          |   |          | X |
| Parkinson disease        | Female | Cumulative Cigarettes (10 Years)                  | X        |   | X        |   |
| Parkinson disease        | Female | Cumulative Cigarettes (5 Years)                   | X        |   | X        |   |
| Parkinson disease        | Female | Health System Access (capped)                     | X        |   | X        |   |
| Parkinson disease        | Female | Absolute value of average latitude                |          | X |          | X |
| Parkinson disease        | Female | Cholesterol (total, mean per capita)              |          | X |          | X |
| Parkinson disease        | Female | Fruits (kcal per capita)                          |          | X |          | X |
| Parkinson disease        | Female | Improved Water Source (proportion with access)    |          | X |          | X |
| Parkinson disease        | Female | Sanitation (proportion with access)               |          | X |          | X |
| Parkinson disease        | Female | Education (years per capita)                      |          | X |          | X |
| Parkinson disease        | Female | LDI (IS per capita)                               |          | X |          | X |
| Parkinson disease        | Female | Sociodemographic Status                           |          |   |          | X |
| Epilepsy                 | Male   | Health System Access (capped)                     | X        |   | X        |   |
| Epilepsy                 | Male   | Log-transformed SEV scalar: Epilepsy              |          |   | X        |   |
| Epilepsy                 | Male   | Pig Meat (kg per capita)                          | X        |   | X        |   |
| Epilepsy                 | Male   | Pigs (per capita)                                 | X        |   | X        |   |
| Epilepsy                 | Male   | Systolic Blood Pressure (mmHg)                    | X        |   | X        |   |
| Epilepsy                 | Male   | Cholesterol (total, mean per capita)              |          | X |          | X |
| Epilepsy                 | Male   | Mean BMI                                          |          | X |          | X |
| Epilepsy                 | Male   | Cumulative Cigarettes (10 Years)                  |          | X |          | X |
| Epilepsy                 | Male   | Cumulative Cigarettes (5 Years)                   |          | X |          | X |
| Epilepsy                 | Male   | Education (years per capita)                      |          | X |          | X |
| Epilepsy                 | Male   | LDI (IS per capita)                               |          | X |          | X |
| Epilepsy                 | Male   | Sociodemographic Status                           |          |   |          | X |
| Epilepsy                 | Female | Health System Access (capped)                     | X        |   | X        |   |
| Epilepsy                 | Female | Log-transformed SEV scalar: Epilepsy              |          |   | X        |   |
| Epilepsy                 | Female | Pig Meat (kg per capita)                          | X        |   | X        |   |
| Epilepsy                 | Female | Pigs (per capita)                                 | X        |   | X        |   |
| Epilepsy                 | Female | Systolic Blood Pressure (mmHg)                    | X        |   | X        |   |
| Epilepsy                 | Female | Cholesterol (total, mean per capita)              |          | X |          | X |
| Epilepsy                 | Female | Mean BMI                                          |          | X |          | X |
| Epilepsy                 | Female | Cumulative Cigarettes (10 Years)                  |          | X |          | X |
| Epilepsy                 | Female | Cumulative Cigarettes (5 Years)                   |          | X |          | X |
| Epilepsy                 | Female | Education (years per capita)                      |          | X |          | X |
| Epilepsy                 | Female | LDI (IS per capita)                               |          | X |          | X |
| Epilepsy                 | Female | Sociodemographic Status                           |          |   |          | X |
| Multiple sclerosis       | Male   | Absolute value of average latitude                | X        |   | X        |   |
| Multiple sclerosis       | Male   | Health System Access (capped)                     | X        |   | X        |   |
| Multiple sclerosis       | Male   | Animal Fats (kcal per capita)                     |          | X |          | X |
| Multiple sclerosis       | Male   | Cholesterol (total, mean per capita)              |          | X |          | X |
| Multiple sclerosis       | Male   | Cumulative Cigarettes (10 Years)                  |          | X |          | X |
| Multiple sclerosis       | Male   | Cumulative Cigarettes (5 Years)                   |          | X |          | X |
| Multiple sclerosis       | Male   | Education (years per capita)                      |          | X |          | X |
| Multiple sclerosis       | Male   | LDI (IS per capita)                               |          | X |          | X |
| Multiple sclerosis       | Male   | Smoking Prevalence                                |          | X |          | X |
| Multiple sclerosis       | Male   | Sociodemographic Status                           |          |   |          | X |
| Multiple sclerosis       | Female | Absolute value of average latitude                | X        |   | X        |   |
| Multiple sclerosis       | Female | Health System Access (capped)                     | X        |   | X        |   |
| Multiple sclerosis       | Female | Animal Fats (kcal per capita)                     |          | X |          | X |

Appendix Table 12: Comparison of GBD 2013 and GBD 2015 covariates and level of covariates in cause of death modeling

|                              |        |                                                     | GBD 2013 |   | GBD 2015 |   |
|------------------------------|--------|-----------------------------------------------------|----------|---|----------|---|
|                              |        |                                                     |          |   |          |   |
| Multiple sclerosis           | Female | Cholesterol (total, mean per capita)                |          | X |          | X |
| Multiple sclerosis           | Female | Cumulative Cigarettes (10 Years)                    |          | X |          | X |
| Multiple sclerosis           | Female | Cumulative Cigarettes (5 Years)                     |          | X |          | X |
| Multiple sclerosis           | Female | Education (years per capita)                        |          | X |          | X |
| Multiple sclerosis           | Female | LDI (IS per capita)                                 |          | X |          | X |
| Multiple sclerosis           | Female | Smoking Prevalence                                  |          | X |          | X |
| Multiple sclerosis           | Female | Sociodemographic Status                             |          |   |          | X |
| Motor neuron disease         | Male   | Asbestos production (kg) per capita                 |          |   | X        |   |
| Motor neuron disease         | Male   | Cholesterol (total, mean per capita)                |          |   | X        |   |
| Motor neuron disease         | Male   | Fruits (kcal per capita)                            |          |   | X        |   |
| Motor neuron disease         | Male   | Health System Access (capped)                       |          |   | X        |   |
| Motor neuron disease         | Male   | Absolute value of average latitude                  |          |   |          | X |
| Motor neuron disease         | Male   | Improved Water Source (proportion with access)      |          |   |          | X |
| Motor neuron disease         | Male   | Sanitation (proportion with access)                 |          |   |          | X |
| Motor neuron disease         | Male   | Education (years per capita)                        |          |   |          | X |
| Motor neuron disease         | Male   | LDI (IS per capita)                                 |          |   |          | X |
| Motor neuron disease         | Male   | Sociodemographic Status                             |          |   |          | X |
| Motor neuron disease         | Female | Asbestos production (kg) per capita                 |          |   | X        |   |
| Motor neuron disease         | Female | Cholesterol (total, mean per capita)                |          |   | X        |   |
| Motor neuron disease         | Female | Fruits (kcal per capita)                            |          |   | X        |   |
| Motor neuron disease         | Female | Health System Access (capped)                       |          |   | X        |   |
| Motor neuron disease         | Female | Absolute value of average latitude                  |          |   |          | X |
| Motor neuron disease         | Female | Improved Water Source (proportion with access)      |          |   |          | X |
| Motor neuron disease         | Female | Sanitation (proportion with access)                 |          |   |          | X |
| Motor neuron disease         | Female | Education (years per capita)                        |          |   |          | X |
| Motor neuron disease         | Female | LDI (IS per capita)                                 |          |   |          | X |
| Motor neuron disease         | Female | Sociodemographic Status                             |          |   |          | X |
| Other neurological disorders | Male   | Cholesterol (total, mean per capita)                | X        |   | X        |   |
| Other neurological disorders | Male   | Health System Access 2 (unifless)                   | X        |   | X        |   |
| Other neurological disorders | Male   | Malnutrition (proportion <2SD weight for age)       | X        |   | X        |   |
| Other neurological disorders | Male   | Mean BMI                                            | X        |   | X        |   |
| Other neurological disorders | Male   | Pig Meat (kg per capita)                            | X        |   | X        |   |
| Other neurological disorders | Male   | Systolic Blood Pressure (mmHg)                      | X        |   | X        |   |
| Other neurological disorders | Male   | Alcohol (litres per capita)                         |          | X |          | X |
| Other neurological disorders | Male   | Animal Fats (kcal per capita)                       |          | X |          | X |
| Other neurological disorders | Male   | Fruits (kcal per capita)                            |          | X |          | X |
| Other neurological disorders | Male   | Population Density (over 1000 ppl/sqkm, proportion) |          | X |          | X |
| Other neurological disorders | Male   | Red Meat (kcal per capita)                          |          | X |          | X |
| Other neurological disorders | Male   | Cumulative Cigarettes (10 Years)                    |          | X |          | X |
| Other neurological disorders | Male   | Cumulative Cigarettes (5 Years)                     |          | X |          | X |
| Other neurological disorders | Male   | Education (years per capita)                        |          | X |          | X |
| Other neurological disorders | Male   | LDI (IS per capita)                                 |          | X |          | X |
| Other neurological disorders | Male   | Smoking Prevalence                                  |          | X |          | X |
| Other neurological disorders | Male   | Sociodemographic Status                             |          |   |          | X |
| Other neurological disorders | Female | Cholesterol (total, mean per capita)                | X        |   | X        |   |
| Other neurological disorders | Female | Health System Access 2 (unifless)                   | X        |   | X        |   |
| Other neurological disorders | Female | Malnutrition (proportion <2SD weight for age)       | X        |   | X        |   |
| Other neurological disorders | Female | Mean BMI                                            | X        |   | X        |   |
| Other neurological disorders | Female | Pig Meat (kg per capita)                            | X        |   | X        |   |
| Other neurological disorders | Female | Systolic Blood Pressure (mmHg)                      | X        |   | X        |   |
| Other neurological disorders | Female | Alcohol (litres per capita)                         |          | X |          | X |
| Other neurological disorders | Female | Animal Fats (kcal per capita)                       |          | X |          | X |
| Other neurological disorders | Female | Fruits (kcal per capita)                            |          | X |          | X |
| Other neurological disorders | Female | Population Density (over 1000 ppl/sqkm, proportion) |          | X |          | X |
| Other neurological disorders | Female | Red Meat (kcal per capita)                          |          | X |          | X |
| Other neurological disorders | Female | Cumulative Cigarettes (10 Years)                    |          | X |          | X |
| Other neurological disorders | Female | Cumulative Cigarettes (5 Years)                     |          | X |          | X |
| Other neurological disorders | Female | Education (years per capita)                        |          | X |          | X |
| Other neurological disorders | Female | LDI (IS per capita)                                 |          | X |          | X |
| Other neurological disorders | Female | Smoking Prevalence                                  |          | X |          | X |
| Other neurological disorders | Female | Sociodemographic Status                             |          |   |          | X |
| Schizophrenia                | Male   | Health System Access 2 (unifless)                   | X        |   | X        |   |
| Schizophrenia                | Male   | Malnutrition (proportion <2SD weight for age)       | X        |   | X        |   |
| Schizophrenia                | Male   | Alcohol (litres per capita)                         |          | X |          | X |
| Schizophrenia                | Male   | Cumulative Cigarettes (20 Years)                    |          | X |          | X |
| Schizophrenia                | Male   | Smoking Prevalence                                  |          | X |          | X |
| Schizophrenia                | Male   | Education (years per capita)                        |          | X |          | X |
| Schizophrenia                | Male   | LDI (IS per capita)                                 |          | X |          | X |
| Schizophrenia                | Male   | Sociodemographic Status                             |          |   |          | X |
| Schizophrenia                | Female | Health System Access 2 (unifless)                   | X        |   | X        |   |
| Schizophrenia                | Female | Malnutrition (proportion <2SD weight for age)       | X        |   | X        |   |
| Schizophrenia                | Female | Alcohol (litres per capita)                         |          | X |          | X |
| Schizophrenia                | Female | Cumulative Cigarettes (20 Years)                    |          | X |          | X |
| Schizophrenia                | Female | Smoking Prevalence                                  |          | X |          | X |
| Schizophrenia                | Female | Education (years per capita)                        |          | X |          | X |
| Schizophrenia                | Female | LDI (IS per capita)                                 |          | X |          | X |
| Schizophrenia                | Female | Sociodemographic Status                             |          |   |          | X |
| Alcohol use disorders        | Male   | Alcohol (litres per capita)                         | X        |   | X        |   |
| Alcohol use disorders        | Male   | Prevalence of binge drinking                        |          |   | X        |   |
| Alcohol use disorders        | Male   | Cumulative Cigarettes (10 Years)                    |          | X |          | X |
| Alcohol use disorders        | Male   | Health System Access 2 (unifless)                   |          | X |          | X |
| Alcohol use disorders        | Male   | Religion (binary, >50% Muslim)                      |          | X |          | X |
| Alcohol use disorders        | Male   | Smoking Prevalence                                  |          | X |          | X |
| Alcohol use disorders        | Male   | Education (years per capita)                        |          | X |          | X |
| Alcohol use disorders        | Male   | LDI (IS per capita)                                 |          | X |          | X |

Appendix Table 12: Comparison of GBD 2013 and GBD 2015 covariates and level of covariates in cause of death modeling

|                           |        |                                      | GBD 2013 |   |   | GBD 2015 |   |   |
|---------------------------|--------|--------------------------------------|----------|---|---|----------|---|---|
|                           |        |                                      |          |   |   |          |   |   |
| Alcohol use disorders     | Male   | Sociodemographic Status              |          |   |   |          |   | X |
| Alcohol use disorders     | Male   | Cholesterol (total, mean per capita) |          | X |   |          |   |   |
| Alcohol use disorders     | Male   | Mean BMI                             |          | X |   |          |   |   |
| Alcohol use disorders     | Male   | Red Meat (kcal per capita)           |          | X |   |          |   |   |
| Alcohol use disorders     | Male   | Systolic Blood Pressure (mmHg)       |          | X |   |          |   |   |
| Alcohol use disorders     | Female | Alcohol (litres per capita)          | X        |   |   | X        |   |   |
| Alcohol use disorders     | Female | Prevalence of binge drinking         |          |   |   | X        |   |   |
| Alcohol use disorders     | Female | Cumulative Cigarettes (10 Years)     |          | X |   |          | X |   |
| Alcohol use disorders     | Female | Health System Access 2 (unitless)    |          | X |   |          | X |   |
| Alcohol use disorders     | Female | Religion (binary, >50% Muslim)       |          | X |   |          | X |   |
| Alcohol use disorders     | Female | Smoking Prevalence                   |          | X |   |          | X |   |
| Alcohol use disorders     | Female | Education (years per capita)         |          |   | X |          |   | X |
| Alcohol use disorders     | Female | LDI (IS per capita)                  |          |   | X |          |   | X |
| Alcohol use disorders     | Female | Sociodemographic Status              |          |   |   |          |   | X |
| Alcohol use disorders     | Female | Cholesterol (total, mean per capita) |          | X |   |          |   |   |
| Alcohol use disorders     | Female | Mean BMI                             |          | X |   |          |   |   |
| Alcohol use disorders     | Female | Red Meat (kcal per capita)           |          | X |   |          |   |   |
| Alcohol use disorders     | Female | Systolic Blood Pressure (mmHg)       |          | X |   |          |   |   |
| Drug use disorders        | Male   | Alcohol (litres per capita)          | X        |   |   | X        |   |   |
| Drug use disorders        | Male   | Cumulative Cigarettes (10 Years)     | X        |   |   | X        |   |   |
| Drug use disorders        | Male   | Cumulative Cigarettes (5 Years)      | X        |   |   | X        |   |   |
| Drug use disorders        | Male   | Health System Access 2 (unitless)    | X        |   |   | X        |   |   |
| Drug use disorders        | Male   | Opium Cultivation (binary)           | X        |   |   | X        |   |   |
| Drug use disorders        | Male   | Smoking Prevalence                   | X        |   |   | X        |   |   |
| Drug use disorders        | Male   | Education (years per capita)         |          |   | X |          |   | X |
| Drug use disorders        | Male   | LDI (IS per capita)                  |          |   | X |          |   | X |
| Drug use disorders        | Male   | Sociodemographic Status              |          |   |   |          |   | X |
| Drug use disorders        | Female | Alcohol (litres per capita)          | X        |   |   | X        |   |   |
| Drug use disorders        | Female | Cumulative Cigarettes (10 Years)     | X        |   |   | X        |   |   |
| Drug use disorders        | Female | Cumulative Cigarettes (5 Years)      | X        |   |   | X        |   |   |
| Drug use disorders        | Female | Health System Access 2 (unitless)    | X        |   |   | X        |   |   |
| Drug use disorders        | Female | Opium Cultivation (binary)           | X        |   |   | X        |   |   |
| Drug use disorders        | Female | Smoking Prevalence                   | X        |   |   | X        |   |   |
| Drug use disorders        | Female | Education (years per capita)         |          |   | X |          |   | X |
| Drug use disorders        | Female | LDI (IS per capita)                  |          |   | X |          |   | X |
| Drug use disorders        | Female | Sociodemographic Status              |          |   |   |          |   | X |
| Opioid use disorders      | Male   | Alcohol (litres per capita)          |          |   |   | X        |   |   |
| Opioid use disorders      | Male   | Cumulative Cigarettes (10 Years)     |          |   |   | X        |   |   |
| Opioid use disorders      | Male   | Cumulative Cigarettes (5 Years)      |          |   |   | X        |   |   |
| Opioid use disorders      | Male   | Health System Access 2 (unitless)    |          |   |   | X        |   |   |
| Opioid use disorders      | Male   | Opium Cultivation (binary)           |          |   |   | X        |   |   |
| Opioid use disorders      | Male   | Smoking Prevalence                   |          |   |   | X        |   |   |
| Opioid use disorders      | Male   | Education (years per capita)         |          |   |   |          |   | X |
| Opioid use disorders      | Male   | LDI (IS per capita)                  |          |   |   |          |   | X |
| Opioid use disorders      | Male   | Sociodemographic Status              |          |   |   |          |   | X |
| Opioid use disorders      | Female | Alcohol (litres per capita)          |          |   |   | X        |   |   |
| Opioid use disorders      | Female | Cumulative Cigarettes (10 Years)     |          |   |   | X        |   |   |
| Opioid use disorders      | Female | Cumulative Cigarettes (5 Years)      |          |   |   | X        |   |   |
| Opioid use disorders      | Female | Health System Access 2 (unitless)    |          |   |   | X        |   |   |
| Opioid use disorders      | Female | Opium Cultivation (binary)           |          |   |   | X        |   |   |
| Opioid use disorders      | Female | Smoking Prevalence                   |          |   |   | X        |   |   |
| Opioid use disorders      | Female | Education (years per capita)         |          |   |   |          |   | X |
| Opioid use disorders      | Female | LDI (IS per capita)                  |          |   |   |          |   | X |
| Opioid use disorders      | Female | Sociodemographic Status              |          |   |   |          |   | X |
| Cocaine use disorders     | Male   | Alcohol (litres per capita)          |          |   |   | X        |   |   |
| Cocaine use disorders     | Male   | Cumulative Cigarettes (10 Years)     |          |   |   | X        |   |   |
| Cocaine use disorders     | Male   | Cumulative Cigarettes (5 Years)      |          |   |   | X        |   |   |
| Cocaine use disorders     | Male   | Health System Access 2 (unitless)    |          |   |   | X        |   |   |
| Cocaine use disorders     | Male   | Smoking Prevalence                   |          |   |   | X        |   |   |
| Cocaine use disorders     | Male   | Education (years per capita)         |          |   |   |          |   | X |
| Cocaine use disorders     | Male   | LDI (IS per capita)                  |          |   |   |          |   | X |
| Cocaine use disorders     | Male   | Sociodemographic Status              |          |   |   |          |   | X |
| Cocaine use disorders     | Female | Alcohol (litres per capita)          |          |   |   | X        |   |   |
| Cocaine use disorders     | Female | Cumulative Cigarettes (10 Years)     |          |   |   | X        |   |   |
| Cocaine use disorders     | Female | Cumulative Cigarettes (5 Years)      |          |   |   | X        |   |   |
| Cocaine use disorders     | Female | Health System Access 2 (unitless)    |          |   |   | X        |   |   |
| Cocaine use disorders     | Female | Smoking Prevalence                   |          |   |   | X        |   |   |
| Cocaine use disorders     | Female | Education (years per capita)         |          |   |   |          |   | X |
| Cocaine use disorders     | Female | LDI (IS per capita)                  |          |   |   |          |   | X |
| Cocaine use disorders     | Female | Sociodemographic Status              |          |   |   |          |   | X |
| Amphetamine use disorders | Male   | Alcohol (litres per capita)          |          |   |   | X        |   |   |
| Amphetamine use disorders | Male   | Cumulative Cigarettes (10 Years)     |          |   |   | X        |   |   |
| Amphetamine use disorders | Male   | Cumulative Cigarettes (5 Years)      |          |   |   | X        |   |   |
| Amphetamine use disorders | Male   | Health System Access 2 (unitless)    |          |   |   | X        |   |   |
| Amphetamine use disorders | Male   | Smoking Prevalence                   |          |   |   | X        |   |   |
| Amphetamine use disorders | Male   | Education (years per capita)         |          |   |   |          |   | X |
| Amphetamine use disorders | Male   | LDI (IS per capita)                  |          |   |   |          |   | X |
| Amphetamine use disorders | Male   | Sociodemographic Status              |          |   |   |          |   | X |
| Amphetamine use disorders | Female | Alcohol (litres per capita)          |          |   |   | X        |   |   |
| Amphetamine use disorders | Female | Cumulative Cigarettes (10 Years)     |          |   |   | X        |   |   |
| Amphetamine use disorders | Female | Cumulative Cigarettes (5 Years)      |          |   |   | X        |   |   |
| Amphetamine use disorders | Female | Health System Access 2 (unitless)    |          |   |   | X        |   |   |
| Amphetamine use disorders | Female | Smoking Prevalence                   |          |   |   | X        |   |   |
| Amphetamine use disorders | Female | Education (years per capita)         |          |   |   |          |   | X |
| Amphetamine use disorders | Female | LDI (IS per capita)                  |          |   |   |          |   | X |

Appendix Table 12: Comparison of GBD 2013 and GBD 2015 covariates and level of covariates in cause of death modeling

|                           |        |                                                   | GBD 2013 |   | GBD 2015 |   |
|---------------------------|--------|---------------------------------------------------|----------|---|----------|---|
|                           |        |                                                   |          |   |          |   |
| Amphetamine use disorders | Female | Sociodemographic Status                           |          |   |          | X |
| Other drug use disorders  | Male   | Alcohol (litres per capita)                       |          |   | X        |   |
| Other drug use disorders  | Male   | Cumulative Cigarettes (10 Years)                  |          |   | X        |   |
| Other drug use disorders  | Male   | Cumulative Cigarettes (5 Years)                   |          |   | X        |   |
| Other drug use disorders  | Male   | Health System Access 2 (unitless)                 |          |   | X        |   |
| Other drug use disorders  | Male   | Smoking Prevalence                                |          |   | X        |   |
| Other drug use disorders  | Male   | Education (years per capita)                      |          |   |          | X |
| Other drug use disorders  | Male   | LDI (IS per capita)                               |          |   |          | X |
| Other drug use disorders  | Male   | Sociodemographic Status                           |          |   |          | X |
| Other drug use disorders  | Female | Alcohol (litres per capita)                       |          |   | X        |   |
| Other drug use disorders  | Female | Cumulative Cigarettes (10 Years)                  |          |   | X        |   |
| Other drug use disorders  | Female | Cumulative Cigarettes (5 Years)                   |          |   | X        |   |
| Other drug use disorders  | Female | Health System Access 2 (unitless)                 |          |   | X        |   |
| Other drug use disorders  | Female | Smoking Prevalence                                |          |   | X        |   |
| Other drug use disorders  | Female | Education (years per capita)                      |          |   |          | X |
| Other drug use disorders  | Female | LDI (IS per capita)                               |          |   |          | X |
| Other drug use disorders  | Female | Sociodemographic Status                           |          |   |          | X |
| Eating disorders          | Male   | Sociodemographic Status                           |          |   |          | X |
| Eating disorders          | Female | Sociodemographic Status                           |          |   |          | X |
| Anorexia nervosa          | Male   | Sociodemographic Status                           |          |   |          | X |
| Anorexia nervosa          | Female | Sociodemographic Status                           |          |   |          | X |
| Bulimia nervosa           | Male   | Sociodemographic Status                           |          |   |          | X |
| Bulimia nervosa           | Female | Sociodemographic Status                           |          |   |          | X |
| Diabetes mellitus         | Male   | Cholesterol (total, mean per capita)              | X        |   | X        |   |
| Diabetes mellitus         | Male   | Diabetes Age-Standardised Prevalence (proportion) | X        |   | X        |   |
| Diabetes mellitus         | Male   | Diabetes Fasting Plasma Glucose (mmol/L)          | X        |   | X        |   |
| Diabetes mellitus         | Male   | Education (years per capita)                      |          | X | X        |   |
| Diabetes mellitus         | Male   | Health System Access 2 (unitless)                 |          |   | X        |   |
| Diabetes mellitus         | Male   | LDI (IS per capita)                               |          | X | X        |   |
| Diabetes mellitus         | Male   | Malnutrition (proportion <2SD weight for age)     |          |   | X        |   |
| Diabetes mellitus         | Male   | Mean BMI                                          | X        |   | X        |   |
| Diabetes mellitus         | Male   | Sociodemographic Status                           |          |   | X        |   |
| Diabetes mellitus         | Male   | Systolic Blood Pressure (mmHg)                    | X        |   | X        |   |
| Diabetes mellitus         | Male   | Animal Fats (kcal per capita)                     |          | X |          | X |
| Diabetes mellitus         | Male   | Health System Access 2 (unitless)                 |          |   |          | X |
| Diabetes mellitus         | Male   | energy unadjusted(kcal)                           |          |   |          | X |
| Diabetes mellitus         | Male   | fruits adjusted(g)                                |          |   |          | X |
| Diabetes mellitus         | Male   | vegetables adjusted(g)                            |          |   |          | X |
| Diabetes mellitus         | Male   | whole grains adjusted(g)                          |          |   |          | X |
| Diabetes mellitus         | Male   | Education (years per capita)                      |          | X |          | X |
| Diabetes mellitus         | Male   | LDI (IS per capita)                               |          | X |          | X |
| Diabetes mellitus         | Male   | Sociodemographic Status                           |          |   |          | X |
| Diabetes mellitus         | Male   | Fruits (kcal per capita)                          | X        |   |          |   |
| Diabetes mellitus         | Male   | Health System Access (unitless)                   | X        |   |          |   |
| Diabetes mellitus         | Male   | Total Calories (kcal per capita)                  | X        |   |          |   |
| Diabetes mellitus         | Male   | Vegetables (kcal per capita)                      | X        |   |          |   |
| Diabetes mellitus         | Male   | Whole Grains (kcal per capita)                    | X        | X |          |   |
| Diabetes mellitus         | Female | Cholesterol (total, mean per capita)              | X        |   | X        |   |
| Diabetes mellitus         | Female | Diabetes Age-Standardised Prevalence (proportion) | X        |   | X        |   |
| Diabetes mellitus         | Female | Diabetes Fasting Plasma Glucose (mmol/L)          | X        |   | X        |   |
| Diabetes mellitus         | Female | Education (years per capita)                      |          | X | X        |   |
| Diabetes mellitus         | Female | Health System Access 2 (unitless)                 |          |   | X        |   |
| Diabetes mellitus         | Female | LDI (IS per capita)                               |          | X | X        |   |
| Diabetes mellitus         | Female | Malnutrition (proportion <2SD weight for age)     |          |   | X        |   |
| Diabetes mellitus         | Female | Mean BMI                                          | X        |   | X        |   |
| Diabetes mellitus         | Female | Sociodemographic Status                           |          |   | X        |   |
| Diabetes mellitus         | Female | Systolic Blood Pressure (mmHg)                    | X        |   | X        |   |
| Diabetes mellitus         | Female | Animal Fats (kcal per capita)                     |          | X |          | X |
| Diabetes mellitus         | Female | Health System Access 2 (unitless)                 |          |   |          | X |
| Diabetes mellitus         | Female | energy unadjusted(kcal)                           |          |   |          | X |
| Diabetes mellitus         | Female | fruits adjusted(g)                                |          |   |          | X |
| Diabetes mellitus         | Female | vegetables adjusted(g)                            |          |   |          | X |
| Diabetes mellitus         | Female | whole grains adjusted(g)                          |          |   |          | X |
| Diabetes mellitus         | Female | Education (years per capita)                      |          | X |          | X |
| Diabetes mellitus         | Female | LDI (IS per capita)                               |          | X |          | X |
| Diabetes mellitus         | Female | Sociodemographic Status                           |          |   |          | X |
| Diabetes mellitus         | Female | Fruits (kcal per capita)                          | X        |   |          |   |
| Diabetes mellitus         | Female | Health System Access (unitless)                   | X        |   |          |   |
| Diabetes mellitus         | Female | Total Calories (kcal per capita)                  | X        |   |          |   |
| Diabetes mellitus         | Female | Vegetables (kcal per capita)                      | X        |   |          |   |
| Diabetes mellitus         | Female | Whole Grains (kcal per capita)                    | X        | X |          |   |
| Acute glomerulonephritis  | Male   | Health System Access (unitless)                   | X        |   | X        |   |
| Acute glomerulonephritis  | Male   | Diabetes Age-Standardised Prevalence (proportion) | X        |   | X        |   |
| Acute glomerulonephritis  | Male   | Improved Water Source (proportion with access)    | X        |   | X        |   |
| Acute glomerulonephritis  | Male   | Sanitation (proportion with access)               | X        |   | X        |   |
| Acute glomerulonephritis  | Male   | Systolic Blood Pressure (mmHg)                    | X        |   | X        |   |
| Acute glomerulonephritis  | Male   | Education (years per capita)                      |          | X |          | X |
| Acute glomerulonephritis  | Male   | LDI (IS per capita)                               |          | X |          | X |
| Acute glomerulonephritis  | Male   | Sociodemographic Status                           |          |   |          | X |
| Acute glomerulonephritis  | Female | Health System Access (unitless)                   | X        |   | X        |   |
| Acute glomerulonephritis  | Female | Diabetes Age-Standardised Prevalence (proportion) | X        |   | X        |   |
| Acute glomerulonephritis  | Female | Improved Water Source (proportion with access)    | X        |   | X        |   |
| Acute glomerulonephritis  | Female | Sanitation (proportion with access)               | X        |   | X        |   |
| Acute glomerulonephritis  | Female | Systolic Blood Pressure (mmHg)                    | X        |   | X        |   |
| Acute glomerulonephritis  | Female | Education (years per capita)                      |          | X |          | X |

Appendix Table 12: Comparison of GBD 2013 and GBD 2015 covariates and level of covariates in cause of death modeling

|                                                     |        |                                                                | GBD 2013 |   | GBD 2015 |   |
|-----------------------------------------------------|--------|----------------------------------------------------------------|----------|---|----------|---|
|                                                     |        |                                                                |          |   |          |   |
| Acute glomerulonephritis                            | Female | LDI (IS per capita)                                            |          | X |          | X |
| Acute glomerulonephritis                            | Female | Sociodemographic Status                                        |          |   |          | X |
| Chronic kidney disease                              | Male   | Diabetes Age-Standardised Prevalence (proportion)              | X        |   | X        |   |
| Chronic kidney disease                              | Male   | Diabetes Fasting Plasma Glucose (mmol/L)                       | X        |   | X        |   |
| Chronic kidney disease                              | Male   | Health System Access (unitless)                                | X        |   | X        |   |
| Chronic kidney disease                              | Male   | Mean BMI                                                       | X        |   | X        |   |
| Chronic kidney disease                              | Male   | Systolic Blood Pressure (mmHg)                                 | X        |   | X        |   |
| Chronic kidney disease                              | Male   | Animal Fats (kcal per capita)                                  |          | X |          | X |
| Chronic kidney disease                              | Male   | Cholesterol (total, mean per capita)                           |          | X |          | X |
| Chronic kidney disease                              | Male   | Red Meat (kcal per capita)                                     |          | X |          | X |
| Chronic kidney disease                              | Male   | Total Calories (kcal per capita)                               |          | X |          | X |
| Chronic kidney disease                              | Male   | Whole Grains (kcal per capita)                                 |          | X |          | X |
| Chronic kidney disease                              | Male   | Education (years per capita)                                   |          | X |          | X |
| Chronic kidney disease                              | Male   | LDI (IS per capita)                                            |          | X |          | X |
| Chronic kidney disease                              | Male   | Sociodemographic Status                                        |          |   |          | X |
| Chronic kidney disease                              | Female | Diabetes Age-Standardised Prevalence (proportion)              | X        |   | X        |   |
| Chronic kidney disease                              | Female | Diabetes Fasting Plasma Glucose (mmol/L)                       | X        |   | X        |   |
| Chronic kidney disease                              | Female | Health System Access (unitless)                                | X        |   | X        |   |
| Chronic kidney disease                              | Female | Mean BMI                                                       | X        |   | X        |   |
| Chronic kidney disease                              | Female | Systolic Blood Pressure (mmHg)                                 | X        |   | X        |   |
| Chronic kidney disease                              | Female | Animal Fats (kcal per capita)                                  |          | X |          | X |
| Chronic kidney disease                              | Female | Cholesterol (total, mean per capita)                           |          | X |          | X |
| Chronic kidney disease                              | Female | Red Meat (kcal per capita)                                     |          | X |          | X |
| Chronic kidney disease                              | Female | Total Calories (kcal per capita)                               |          | X |          | X |
| Chronic kidney disease                              | Female | Whole Grains (kcal per capita)                                 |          | X |          | X |
| Chronic kidney disease                              | Female | Education (years per capita)                                   |          | X |          | X |
| Chronic kidney disease                              | Female | LDI (IS per capita)                                            |          | X |          | X |
| Chronic kidney disease                              | Female | Sociodemographic Status                                        |          |   |          | X |
| Urinary diseases and male infertility               | Male   | Health System Access 2 (unitless)                              | X        |   | X        |   |
| Urinary diseases and male infertility               | Male   | Latitude 15 to 30 (proportion)                                 |          | X |          | X |
| Urinary diseases and male infertility               | Male   | Latitude 30 to 45 (proportion)                                 |          | X |          | X |
| Urinary diseases and male infertility               | Male   | Latitude Over 45 (proportion)                                  |          | X |          | X |
| Urinary diseases and male infertility               | Male   | Latitude Under 15 (proportion)                                 |          | X |          | X |
| Urinary diseases and male infertility               | Male   | Mean BMI                                                       |          | X |          | X |
| Urinary diseases and male infertility               | Male   | Education (years per capita)                                   |          | X |          | X |
| Urinary diseases and male infertility               | Male   | LDI (IS per capita)                                            |          | X |          | X |
| Urinary diseases and male infertility               | Male   | Sociodemographic Status                                        |          |   |          | X |
| Urinary diseases and male infertility               | Female | Health System Access 2 (unitless)                              | X        |   | X        |   |
| Urinary diseases and male infertility               | Female | Latitude 15 to 30 (proportion)                                 |          | X |          | X |
| Urinary diseases and male infertility               | Female | Latitude 30 to 45 (proportion)                                 |          | X |          | X |
| Urinary diseases and male infertility               | Female | Latitude Over 45 (proportion)                                  |          | X |          | X |
| Urinary diseases and male infertility               | Female | Latitude Under 15 (proportion)                                 |          | X |          | X |
| Urinary diseases and male infertility               | Female | Mean BMI                                                       |          | X |          | X |
| Urinary diseases and male infertility               | Female | Education (years per capita)                                   |          | X |          | X |
| Urinary diseases and male infertility               | Female | LDI (IS per capita)                                            |          | X |          | X |
| Urinary diseases and male infertility               | Female | Sociodemographic Status                                        |          |   |          | X |
| Interstitial nephritis and urinary tract infections | Male   | Health System Access 2 (unitless)                              | X        |   | X        |   |
| Interstitial nephritis and urinary tract infections | Male   | Sanitation (proportion with access)                            |          |   | X        |   |
| Interstitial nephritis and urinary tract infections | Male   | Education (years per capita)                                   |          | X |          | X |
| Interstitial nephritis and urinary tract infections | Male   | LDI (IS per capita)                                            |          | X |          | X |
| Interstitial nephritis and urinary tract infections | Male   | Sociodemographic Status                                        |          |   |          | X |
| Interstitial nephritis and urinary tract infections | Male   | Hospital Beds (per 1000)                                       |          | X |          |   |
| Interstitial nephritis and urinary tract infections | Female | Health System Access 2 (unitless)                              | X        |   | X        |   |
| Interstitial nephritis and urinary tract infections | Female | Sanitation (proportion with access)                            |          |   | X        |   |
| Interstitial nephritis and urinary tract infections | Female | Education (years per capita)                                   |          | X |          | X |
| Interstitial nephritis and urinary tract infections | Female | LDI (IS per capita)                                            |          | X |          | X |
| Interstitial nephritis and urinary tract infections | Female | Sociodemographic Status                                        |          |   |          | X |
| Interstitial nephritis and urinary tract infections | Female | Hospital Beds (per 1000)                                       |          | X |          |   |
| Urolithiasis                                        | Male   | 90th percentile climatic temperature in the given country-year | X        |   | X        |   |
| Urolithiasis                                        | Male   | Health System Access (unitless)                                | X        |   | X        |   |
| Urolithiasis                                        | Male   | Animal Fats (kcal per capita)                                  |          | X |          | X |
| Urolithiasis                                        | Male   | Fruits (kcal per capita)                                       |          | X |          | X |
| Urolithiasis                                        | Male   | Red Meat (kcal per capita)                                     |          | X |          | X |
| Urolithiasis                                        | Male   | Vegetables (kcal per capita)                                   |          | X |          | X |
| Urolithiasis                                        | Male   | Education (years per capita)                                   |          | X |          | X |
| Urolithiasis                                        | Male   | LDI (IS per capita)                                            |          | X |          | X |
| Urolithiasis                                        | Male   | Sociodemographic Status                                        |          |   |          | X |
| Urolithiasis                                        | Female | 90th percentile climatic temperature in the given country-year | X        |   | X        |   |
| Urolithiasis                                        | Female | Health System Access (unitless)                                | X        |   | X        |   |
| Urolithiasis                                        | Female | Animal Fats (kcal per capita)                                  |          | X |          | X |
| Urolithiasis                                        | Female | Fruits (kcal per capita)                                       |          | X |          | X |
| Urolithiasis                                        | Female | Red Meat (kcal per capita)                                     |          | X |          | X |
| Urolithiasis                                        | Female | Vegetables (kcal per capita)                                   |          | X |          | X |
| Urolithiasis                                        | Female | Education (years per capita)                                   |          | X |          | X |
| Urolithiasis                                        | Female | LDI (IS per capita)                                            |          | X |          | X |
| Urolithiasis                                        | Female | Sociodemographic Status                                        |          |   |          | X |
| Other urinary diseases                              | Male   | Health System Access 2 (unitless)                              | X        |   | X        |   |
| Other urinary diseases                              | Male   | Mean BMI                                                       | X        |   | X        |   |
| Other urinary diseases                              | Male   | Education (years per capita)                                   | X        |   | X        |   |
| Other urinary diseases                              | Male   | LDI (IS per capita)                                            | X        |   | X        |   |
| Other urinary diseases                              | Male   | Sociodemographic Status                                        |          |   |          | X |
| Other urinary diseases                              | Female | Education (years per capita)                                   | X        |   | X        |   |
| Other urinary diseases                              | Female | Health System Access 2 (unitless)                              | X        |   | X        |   |
| Other urinary diseases                              | Female | LDI (IS per capita)                                            | X        |   | X        |   |
| Other urinary diseases                              | Female | Mean BMI                                                       | X        |   | X        |   |

Appendix Table 12: Comparison of GBD 2013 and GBD 2015 covariates and level of covariates in cause of death modeling

|                                                   |        |                                                                              | GBD 2013 |   | GBD 2015 |   |
|---------------------------------------------------|--------|------------------------------------------------------------------------------|----------|---|----------|---|
|                                                   |        |                                                                              |          |   |          |   |
| Other urinary diseases                            | Female | Sociodemographic Status                                                      |          |   |          | X |
| Gynecological diseases                            | Female | Health System Access (unitless)                                              | X        |   | X        |   |
| Gynecological diseases                            | Female | Smoking Prevalence                                                           | X        |   | X        |   |
| Gynecological diseases                            | Female | Live Births 35+ (proportion)                                                 |          | X |          | X |
| Gynecological diseases                            | Female | Skilled Birth Attendance (proportion)                                        |          | X |          | X |
| Gynecological diseases                            | Female | Total Fertility Rate                                                         |          | X |          | X |
| Gynecological diseases                            | Female | Education (years per capita)                                                 |          | X |          | X |
| Gynecological diseases                            | Female | LDI (IS per capita)                                                          |          | X |          | X |
| Gynecological diseases                            | Female | Sociodemographic Status                                                      |          |   |          | X |
| Gynecological diseases                            | Female | Fruits (kcal per capita)                                                     |          | X |          |   |
| Gynecological diseases                            | Female | Indoor Air Pollution (All Cooking Fuels)                                     | X        |   |          |   |
| Gynecological diseases                            | Female | Mean BMI                                                                     |          | X |          |   |
| Gynecological diseases                            | Female | Vegetables (kcal per capita)                                                 |          | X |          |   |
| Uterine fibroids                                  | Female | Health System Access (unitless)                                              |          |   | X        |   |
| Uterine fibroids                                  | Female | Smoking Prevalence                                                           |          |   | X        |   |
| Uterine fibroids                                  | Female | Live Births 35+ (proportion)                                                 |          |   |          | X |
| Uterine fibroids                                  | Female | Skilled Birth Attendance (proportion)                                        |          |   |          | X |
| Uterine fibroids                                  | Female | Total Fertility Rate                                                         |          |   |          | X |
| Uterine fibroids                                  | Female | Education (years per capita)                                                 |          |   |          | X |
| Uterine fibroids                                  | Female | LDI (IS per capita)                                                          |          |   |          | X |
| Uterine fibroids                                  | Female | Sociodemographic Status                                                      |          |   |          | X |
| Polycystic ovarian syndrome                       | Female | Health System Access (unitless)                                              |          |   | X        |   |
| Polycystic ovarian syndrome                       | Female | Smoking Prevalence                                                           |          |   | X        |   |
| Polycystic ovarian syndrome                       | Female | Live Births 35+ (proportion)                                                 |          |   |          | X |
| Polycystic ovarian syndrome                       | Female | Skilled Birth Attendance (proportion)                                        |          |   |          | X |
| Polycystic ovarian syndrome                       | Female | Total Fertility Rate                                                         |          |   |          | X |
| Polycystic ovarian syndrome                       | Female | Education (years per capita)                                                 |          |   |          | X |
| Polycystic ovarian syndrome                       | Female | LDI (IS per capita)                                                          |          |   |          | X |
| Polycystic ovarian syndrome                       | Female | Sociodemographic Status                                                      |          |   |          | X |
| Endometriosis                                     | Female | Health System Access (unitless)                                              |          |   | X        |   |
| Endometriosis                                     | Female | Smoking Prevalence                                                           |          |   | X        |   |
| Endometriosis                                     | Female | Live Births 35+ (proportion)                                                 |          |   |          | X |
| Endometriosis                                     | Female | Skilled Birth Attendance (proportion)                                        |          |   |          | X |
| Endometriosis                                     | Female | Total Fertility Rate                                                         |          |   |          | X |
| Endometriosis                                     | Female | Education (years per capita)                                                 |          |   |          | X |
| Endometriosis                                     | Female | LDI (IS per capita)                                                          |          |   |          | X |
| Endometriosis                                     | Female | Sociodemographic Status                                                      |          |   |          | X |
| Genital prolapse                                  | Female | Health System Access (unitless)                                              |          |   | X        |   |
| Genital prolapse                                  | Female | Smoking Prevalence                                                           |          |   | X        |   |
| Genital prolapse                                  | Female | Live Births 35+ (proportion)                                                 |          |   |          | X |
| Genital prolapse                                  | Female | Skilled Birth Attendance (proportion)                                        |          |   |          | X |
| Genital prolapse                                  | Female | Total Fertility Rate                                                         |          |   |          | X |
| Genital prolapse                                  | Female | Education (years per capita)                                                 |          |   |          | X |
| Genital prolapse                                  | Female | LDI (IS per capita)                                                          |          |   |          | X |
| Genital prolapse                                  | Female | Sociodemographic Status                                                      |          |   |          | X |
| Other gynecological diseases                      | Female | Health System Access (unitless)                                              |          |   | X        |   |
| Other gynecological diseases                      | Female | Smoking Prevalence                                                           |          |   | X        |   |
| Other gynecological diseases                      | Female | Live Births 35+ (proportion)                                                 |          |   |          | X |
| Other gynecological diseases                      | Female | Skilled Birth Attendance (proportion)                                        |          |   |          | X |
| Other gynecological diseases                      | Female | Total Fertility Rate                                                         |          |   |          | X |
| Other gynecological diseases                      | Female | Education (years per capita)                                                 |          |   |          | X |
| Other gynecological diseases                      | Female | LDI (IS per capita)                                                          |          |   |          | X |
| Other gynecological diseases                      | Female | Sociodemographic Status                                                      |          |   |          | X |
| Hemoglobinopathies and hemolytic anemias          | Male   | Hemoglobinopathies Prevalence x Excess Mortality                             |          |   | X        |   |
| Hemoglobinopathies and hemolytic anemias          | Male   | Hemoglobinopathies Prevalence x Excess Mortality (excluding G6PD deficiency) | X        |   | X        |   |
| Hemoglobinopathies and hemolytic anemias          | Male   | Health System Access (capped)                                                |          | X |          | X |
| Hemoglobinopathies and hemolytic anemias          | Male   | Latitude 15 to 30 (proportion)                                               |          | X |          | X |
| Hemoglobinopathies and hemolytic anemias          | Male   | Latitude 30 to 45 (proportion)                                               |          | X |          | X |
| Hemoglobinopathies and hemolytic anemias          | Male   | Latitude Over 45 (proportion)                                                |          | X |          | X |
| Hemoglobinopathies and hemolytic anemias          | Male   | Latitude Under 15 (proportion)                                               |          | X |          | X |
| Hemoglobinopathies and hemolytic anemias          | Male   | Education (years per capita)                                                 |          | X |          | X |
| Hemoglobinopathies and hemolytic anemias          | Male   | LDI (IS per capita)                                                          |          | X |          | X |
| Hemoglobinopathies and hemolytic anemias          | Male   | Latitude 15 to 30 (proportion)                                               |          | X |          | X |
| Hemoglobinopathies and hemolytic anemias          | Male   | Latitude 30 to 45 (proportion)                                               |          | X |          | X |
| Hemoglobinopathies and hemolytic anemias          | Male   | Latitude Over 45 (proportion)                                                |          | X |          | X |
| Hemoglobinopathies and hemolytic anemias          | Male   | Latitude Under 15 (proportion)                                               |          | X |          | X |
| Hemoglobinopathies and hemolytic anemias          | Male   | Sociodemographic Status                                                      |          |   |          | X |
| Hemoglobinopathies and hemolytic anemias          | Female | Hemoglobinopathies Prevalence x Excess Mortality                             |          |   | X        |   |
| Hemoglobinopathies and hemolytic anemias          | Female | Hemoglobinopathies Prevalence x Excess Mortality (excluding G6PD deficiency) | X        |   | X        |   |
| Hemoglobinopathies and hemolytic anemias          | Female | Health System Access (capped)                                                |          | X |          | X |
| Hemoglobinopathies and hemolytic anemias          | Female | Latitude 15 to 30 (proportion)                                               |          | X |          | X |
| Hemoglobinopathies and hemolytic anemias          | Female | Latitude 30 to 45 (proportion)                                               |          | X |          | X |
| Hemoglobinopathies and hemolytic anemias          | Female | Latitude Over 45 (proportion)                                                |          | X |          | X |
| Hemoglobinopathies and hemolytic anemias          | Female | Latitude Under 15 (proportion)                                               |          | X |          | X |
| Hemoglobinopathies and hemolytic anemias          | Female | Education (years per capita)                                                 |          | X |          | X |
| Hemoglobinopathies and hemolytic anemias          | Female | LDI (IS per capita)                                                          |          | X |          | X |
| Hemoglobinopathies and hemolytic anemias          | Female | Latitude 15 to 30 (proportion)                                               |          | X |          | X |
| Hemoglobinopathies and hemolytic anemias          | Female | Latitude 30 to 45 (proportion)                                               |          | X |          | X |
| Hemoglobinopathies and hemolytic anemias          | Female | Latitude Over 45 (proportion)                                                |          | X |          | X |
| Hemoglobinopathies and hemolytic anemias          | Female | Latitude Under 15 (proportion)                                               |          | X |          | X |
| Hemoglobinopathies and hemolytic anemias          | Female | Sociodemographic Status                                                      |          |   |          | X |
| Endocrine, metabolic, blood, and immune disorders | Male   | Health System Access 2 (unitless)                                            | X        |   | X        |   |
| Endocrine, metabolic, blood, and immune disorders | Male   | Mean BMI                                                                     | X        |   | X        |   |
| Endocrine, metabolic, blood, and immune disorders | Male   | Alcohol (litres per capita)                                                  |          | X |          | X |
| Endocrine, metabolic, blood, and immune disorders | Male   | Animal Fats (kcal per capita)                                                |          | X |          | X |



Appendix Table 12: Comparison of GBD 2013 and GBD 2015 covariates and level of covariates in cause of death modeling

|                                                   |        |                                      | GBD 2013 |   | GBD 2015 |   |
|---------------------------------------------------|--------|--------------------------------------|----------|---|----------|---|
|                                                   |        |                                      |          |   |          |   |
| Endocrine, metabolic, blood, and immune disorders | Male   | Cholesterol (total, mean per capita) |          | X |          | X |
| Endocrine, metabolic, blood, and immune disorders | Male   | Total Calories (kcal per capita)     |          | X |          | X |
| Endocrine, metabolic, blood, and immune disorders | Male   | Education (years per capita)         |          |   | X        | X |
| Endocrine, metabolic, blood, and immune disorders | Male   | LDI (IS per capita)                  |          | X |          | X |
| Endocrine, metabolic, blood, and immune disorders | Male   | Sociodemographic Status              |          |   |          | X |
| Endocrine, metabolic, blood, and immune disorders | Female | Health System Access 2 (unitless)    | X        |   | X        |   |
| Endocrine, metabolic, blood, and immune disorders | Female | Mean BMI                             | X        |   | X        |   |
| Endocrine, metabolic, blood, and immune disorders | Female | Alcohol (litres per capita)          |          | X |          | X |
| Endocrine, metabolic, blood, and immune disorders | Female | Animal Fats (kcal per capita)        |          | X |          | X |
| Endocrine, metabolic, blood, and immune disorders | Female | Cholesterol (total, mean per capita) |          | X |          | X |
| Endocrine, metabolic, blood, and immune disorders | Female | Total Calories (kcal per capita)     |          | X |          | X |
| Endocrine, metabolic, blood, and immune disorders | Female | Education (years per capita)         |          | X |          | X |
| Endocrine, metabolic, blood, and immune disorders | Female | LDI (IS per capita)                  |          | X |          | X |
| Endocrine, metabolic, blood, and immune disorders | Female | Sociodemographic Status              |          |   |          | X |
| Musculoskeletal disorders                         | Male   | Mean BMI                             | X        |   | X        |   |
| Musculoskeletal disorders                         | Male   | Alcohol (litres per capita)          |          | X |          | X |
| Musculoskeletal disorders                         | Male   | Cholesterol (total, mean per capita) |          | X |          | X |
| Musculoskeletal disorders                         | Male   | Cumulative Cigarettes (10 Years)     |          | X |          | X |
| Musculoskeletal disorders                         | Male   | Cumulative Cigarettes (5 Years)      |          | X |          | X |
| Musculoskeletal disorders                         | Male   | Education (years per capita)         |          | X |          | X |
| Musculoskeletal disorders                         | Male   | Health System Access 2 (unitless)    |          | X |          | X |
| Musculoskeletal disorders                         | Male   | LDI (IS per capita)                  |          | X |          | X |
| Musculoskeletal disorders                         | Male   | Smoking Prevalence                   |          | X |          | X |
| Musculoskeletal disorders                         | Male   | Vegetables (kcal per capita)         |          | X |          | X |
| Musculoskeletal disorders                         | Male   | Sociodemographic Status              |          |   |          | X |
| Musculoskeletal disorders                         | Male   | Latitude 15 to 30 (proportion)       |          | X |          |   |
| Musculoskeletal disorders                         | Male   | Latitude 30 to 45 (proportion)       |          | X |          |   |
| Musculoskeletal disorders                         | Male   | Latitude Over 45 (proportion)        |          | X |          |   |
| Musculoskeletal disorders                         | Male   | Latitude Under 15 (proportion)       |          | X |          |   |
| Musculoskeletal disorders                         | Female | Mean BMI                             | X        |   | X        |   |
| Musculoskeletal disorders                         | Female | Alcohol (litres per capita)          |          | X |          | X |
| Musculoskeletal disorders                         | Female | Cholesterol (total, mean per capita) |          | X |          | X |
| Musculoskeletal disorders                         | Female | Cumulative Cigarettes (10 Years)     |          | X |          | X |
| Musculoskeletal disorders                         | Female | Cumulative Cigarettes (5 Years)      |          | X |          | X |
| Musculoskeletal disorders                         | Female | Education (years per capita)         |          | X |          | X |
| Musculoskeletal disorders                         | Female | Health System Access 2 (unitless)    |          | X |          | X |
| Musculoskeletal disorders                         | Female | LDI (IS per capita)                  |          | X |          | X |
| Musculoskeletal disorders                         | Female | Smoking Prevalence                   |          | X |          | X |
| Musculoskeletal disorders                         | Female | Vegetables (kcal per capita)         |          | X |          | X |
| Musculoskeletal disorders                         | Female | Sociodemographic Status              |          |   |          | X |
| Musculoskeletal disorders                         | Female | Latitude 15 to 30 (proportion)       |          | X |          |   |
| Musculoskeletal disorders                         | Female | Latitude 30 to 45 (proportion)       |          | X |          |   |
| Musculoskeletal disorders                         | Female | Latitude Over 45 (proportion)        |          | X |          |   |
| Musculoskeletal disorders                         | Female | Latitude Under 15 (proportion)       |          | X |          |   |
| Rheumatoid arthritis                              | Male   | Alcohol (litres per capita)          | X        |   | X        |   |
| Rheumatoid arthritis                              | Male   | Cumulative Cigarettes (10 Years)     | X        |   | X        |   |
| Rheumatoid arthritis                              | Male   | Cumulative Cigarettes (5 Years)      | X        |   | X        |   |
| Rheumatoid arthritis                              | Male   | Health System Access 2 (unitless)    | X        |   | X        |   |
| Rheumatoid arthritis                              | Male   | Smoking Prevalence                   | X        |   | X        |   |
| Rheumatoid arthritis                              | Male   | Cholesterol (total, mean per capita) |          | X |          | X |
| Rheumatoid arthritis                              | Male   | Vegetables (kcal per capita)         |          | X |          | X |
| Rheumatoid arthritis                              | Male   | Education (years per capita)         |          | X |          | X |
| Rheumatoid arthritis                              | Male   | LDI (IS per capita)                  |          | X |          | X |
| Rheumatoid arthritis                              | Male   | Mean BMI                             |          | X |          | X |
| Rheumatoid arthritis                              | Male   | Sociodemographic Status              |          |   |          | X |
| Rheumatoid arthritis                              | Male   | Latitude 15 to 30 (proportion)       |          | X |          |   |
| Rheumatoid arthritis                              | Male   | Latitude 30 to 45 (proportion)       |          | X |          |   |
| Rheumatoid arthritis                              | Male   | Latitude Over 45 (proportion)        |          | X |          |   |
| Rheumatoid arthritis                              | Male   | Latitude Under 15 (proportion)       |          | X |          |   |
| Rheumatoid arthritis                              | Female | Alcohol (litres per capita)          | X        |   | X        |   |
| Rheumatoid arthritis                              | Female | Cumulative Cigarettes (10 Years)     | X        |   | X        |   |
| Rheumatoid arthritis                              | Female | Cumulative Cigarettes (5 Years)      | X        |   | X        |   |
| Rheumatoid arthritis                              | Female | Health System Access 2 (unitless)    | X        |   | X        |   |
| Rheumatoid arthritis                              | Female | Smoking Prevalence                   | X        |   | X        |   |
| Rheumatoid arthritis                              | Female | Cholesterol (total, mean per capita) |          | X |          | X |
| Rheumatoid arthritis                              | Female | Vegetables (kcal per capita)         |          | X |          | X |
| Rheumatoid arthritis                              | Female | Education (years per capita)         |          | X |          | X |
| Rheumatoid arthritis                              | Female | LDI (IS per capita)                  |          | X |          | X |
| Rheumatoid arthritis                              | Female | Mean BMI                             |          | X |          | X |
| Rheumatoid arthritis                              | Female | Sociodemographic Status              |          |   |          | X |
| Rheumatoid arthritis                              | Female | Latitude 15 to 30 (proportion)       |          | X |          |   |
| Rheumatoid arthritis                              | Female | Latitude 30 to 45 (proportion)       |          | X |          |   |
| Rheumatoid arthritis                              | Female | Latitude Over 45 (proportion)        |          | X |          |   |
| Rheumatoid arthritis                              | Female | Latitude Under 15 (proportion)       |          | X |          |   |
| Other musculoskeletal disorders                   | Male   | Mean BMI                             | X        |   | X        |   |
| Other musculoskeletal disorders                   | Male   | Alcohol (litres per capita)          |          | X |          | X |
| Other musculoskeletal disorders                   | Male   | Cholesterol (total, mean per capita) |          | X |          | X |
| Other musculoskeletal disorders                   | Male   | Cumulative Cigarettes (10 Years)     |          | X |          | X |
| Other musculoskeletal disorders                   | Male   | Cumulative Cigarettes (5 Years)      |          | X |          | X |
| Other musculoskeletal disorders                   | Male   | Education (years per capita)         |          | X |          | X |
| Other musculoskeletal disorders                   | Male   | Health System Access 2 (unitless)    |          | X |          | X |
| Other musculoskeletal disorders                   | Male   | LDI (IS per capita)                  |          | X |          | X |
| Other musculoskeletal disorders                   | Male   | Smoking Prevalence                   |          | X |          | X |
| Other musculoskeletal disorders                   | Male   | Vegetables (kcal per capita)         |          | X |          | X |
| Other musculoskeletal disorders                   | Male   | Sociodemographic Status              |          |   |          | X |

Appendix Table 12: Comparison of GBD 2013 and GBD 2015 covariates and level of covariates in cause of death modeling

|                                 |        |                                                                     | GBD 2013 |   | GBD 2015 |   |
|---------------------------------|--------|---------------------------------------------------------------------|----------|---|----------|---|
|                                 |        |                                                                     |          |   |          |   |
| Other musculoskeletal disorders | Male   | Latitude 15 to 30 (proportion)                                      |          | X |          |   |
| Other musculoskeletal disorders | Male   | Latitude 30 to 45 (proportion)                                      |          | X |          |   |
| Other musculoskeletal disorders | Male   | Latitude Over 45 (proportion)                                       |          | X |          |   |
| Other musculoskeletal disorders | Male   | Latitude Under 15 (proportion)                                      |          | X |          |   |
| Other musculoskeletal disorders | Female | Mean BMI                                                            | X        |   | X        |   |
| Other musculoskeletal disorders | Female | Alcohol (litres per capita)                                         |          | X |          | X |
| Other musculoskeletal disorders | Female | Cholesterol (total, mean per capita)                                |          | X |          | X |
| Other musculoskeletal disorders | Female | Cumulative Cigarettes (10 Years)                                    |          | X |          | X |
| Other musculoskeletal disorders | Female | Cumulative Cigarettes (5 Years)                                     |          | X |          | X |
| Other musculoskeletal disorders | Female | Education (years per capita)                                        |          | X |          | X |
| Other musculoskeletal disorders | Female | Health System Access 2 (unitless)                                   |          | X |          | X |
| Other musculoskeletal disorders | Female | LDI (IS per capita)                                                 |          | X |          | X |
| Other musculoskeletal disorders | Female | Smoking Prevalence                                                  |          | X |          | X |
| Other musculoskeletal disorders | Female | Vegetables (kcal per capita)                                        |          | X |          | X |
| Other musculoskeletal disorders | Female | Sociodemographic Status                                             |          |   |          | X |
| Other musculoskeletal disorders | Female | Latitude 15 to 30 (proportion)                                      |          | X |          |   |
| Other musculoskeletal disorders | Female | Latitude 30 to 45 (proportion)                                      |          | X |          |   |
| Other musculoskeletal disorders | Female | Latitude Over 45 (proportion)                                       |          | X |          |   |
| Other musculoskeletal disorders | Female | Latitude Under 15 (proportion)                                      |          | X |          |   |
| Congenital anomalies            | Male   | Alcohol (litres per capita)                                         | X        |   | X        |   |
| Congenital anomalies            | Male   | Live Births 35+ (proportion)                                        | X        |   | X        |   |
| Congenital anomalies            | Male   | Education (years per capita)                                        |          | X |          | X |
| Congenital anomalies            | Male   | Health System Access (capped)                                       |          | X |          | X |
| Congenital anomalies            | Male   | Legality of Abortion                                                |          | X |          | X |
| Congenital anomalies            | Male   | Fruits (kcal per capita)                                            |          | X |          | X |
| Congenital anomalies            | Male   | Indoor Air Pollution (All Cooking Fuels)                            |          | X |          | X |
| Congenital anomalies            | Male   | LDI (IS per capita)                                                 |          | X |          | X |
| Congenital anomalies            | Male   | Smoking Prevalence (Reproductive Age Standardised)                  |          | X |          | X |
| Congenital anomalies            | Male   | Sociodemographic Status                                             |          |   |          | X |
| Congenital anomalies            | Male   | Vegetables (kcal per capita)                                        |          | X |          | X |
| Congenital anomalies            | Male   | Rate of congenital chromosomal abnormalities (per 1000 live births) | X        |   |          |   |
| Congenital anomalies            | Male   | Rate of congenital heart disease (per 1000 live births)             | X        |   |          |   |
| Congenital anomalies            | Female | Alcohol (litres per capita)                                         | X        |   | X        |   |
| Congenital anomalies            | Female | Live Births 35+ (proportion)                                        | X        |   | X        |   |
| Congenital anomalies            | Female | Education (years per capita)                                        |          | X |          | X |
| Congenital anomalies            | Female | Health System Access (capped)                                       |          | X |          | X |
| Congenital anomalies            | Female | Legality of Abortion                                                |          | X |          | X |
| Congenital anomalies            | Female | Fruits (kcal per capita)                                            |          | X |          | X |
| Congenital anomalies            | Female | Indoor Air Pollution (All Cooking Fuels)                            |          | X |          | X |
| Congenital anomalies            | Female | LDI (IS per capita)                                                 |          | X |          | X |
| Congenital anomalies            | Female | Smoking Prevalence (Reproductive Age Standardised)                  |          | X |          | X |
| Congenital anomalies            | Female | Sociodemographic Status                                             |          |   |          | X |
| Congenital anomalies            | Female | Vegetables (kcal per capita)                                        |          | X |          | X |
| Congenital anomalies            | Female | Rate of congenital chromosomal abnormalities (per 1000 live births) | X        |   |          |   |
| Congenital anomalies            | Female | Rate of congenital heart disease (per 1000 live births)             | X        |   |          |   |
| Neural tube defects             | Male   | Diabetes Age-Standardised Prevalence (proportion)                   | X        |   | X        |   |
| Neural tube defects             | Male   | Indoor Air Pollution (All Cooking Fuels)                            | X        |   | X        |   |
| Neural tube defects             | Male   | Smoking Prevalence (Reproductive Age Standardised)                  | X        |   | X        |   |
| Neural tube defects             | Male   | Alcohol (litres per capita)                                         |          | X |          | X |
| Neural tube defects             | Male   | Fruits (kcal per capita)                                            |          | X |          | X |
| Neural tube defects             | Male   | LDI (IS per capita)                                                 |          | X |          | X |
| Neural tube defects             | Male   | Vegetables (kcal per capita)                                        |          | X |          | X |
| Neural tube defects             | Male   | Education (years per capita)                                        |          | X |          | X |
| Neural tube defects             | Male   | Health System Access 2 (unitless)                                   |          | X |          | X |
| Neural tube defects             | Male   | Sociodemographic Status                                             |          |   |          | X |
| Neural tube defects             | Female | Diabetes Age-Standardised Prevalence (proportion)                   | X        |   | X        |   |
| Neural tube defects             | Female | Indoor Air Pollution (All Cooking Fuels)                            | X        |   | X        |   |
| Neural tube defects             | Female | Smoking Prevalence (Reproductive Age Standardised)                  | X        |   | X        |   |
| Neural tube defects             | Female | Alcohol (litres per capita)                                         |          | X |          | X |
| Neural tube defects             | Female | Fruits (kcal per capita)                                            |          | X |          | X |
| Neural tube defects             | Female | LDI (IS per capita)                                                 |          | X |          | X |
| Neural tube defects             | Female | Vegetables (kcal per capita)                                        |          | X |          | X |
| Neural tube defects             | Female | Education (years per capita)                                        |          | X |          | X |
| Neural tube defects             | Female | Health System Access 2 (unitless)                                   |          | X |          | X |
| Neural tube defects             | Female | Sociodemographic Status                                             |          |   |          | X |
| Congenital heart anomalies      | Male   | Alcohol (litres per capita)                                         | X        |   | X        |   |
| Congenital heart anomalies      | Male   | Live Births 35+ (proportion)                                        | X        |   | X        |   |
| Congenital heart anomalies      | Male   | Measles Vaccine Coverage (proportion)                               | X        |   | X        |   |
| Congenital heart anomalies      | Male   | Diabetes Age-Standardised Prevalence (proportion)                   |          | X |          | X |
| Congenital heart anomalies      | Male   | Education (years per capita)                                        |          | X |          | X |
| Congenital heart anomalies      | Male   | LDI (IS per capita)                                                 |          | X |          | X |
| Congenital heart anomalies      | Male   | Legality of Abortion                                                |          | X |          | X |
| Congenital heart anomalies      | Male   | Indoor Air Pollution (All Cooking Fuels)                            |          | X |          | X |
| Congenital heart anomalies      | Male   | Smoking Prevalence (Reproductive Age Standardised)                  |          | X |          | X |
| Congenital heart anomalies      | Male   | Sociodemographic Status                                             |          |   |          | X |
| Congenital heart anomalies      | Male   | Rate of congenital heart disease (per 1000 live births)             | X        |   |          |   |
| Congenital heart anomalies      | Female | Alcohol (litres per capita)                                         | X        |   | X        |   |
| Congenital heart anomalies      | Female | Live Births 35+ (proportion)                                        | X        |   | X        |   |
| Congenital heart anomalies      | Female | Measles Vaccine Coverage (proportion)                               | X        |   | X        |   |
| Congenital heart anomalies      | Female | Diabetes Age-Standardised Prevalence (proportion)                   |          | X |          | X |
| Congenital heart anomalies      | Female | Education (years per capita)                                        |          | X |          | X |
| Congenital heart anomalies      | Female | LDI (IS per capita)                                                 |          | X |          | X |
| Congenital heart anomalies      | Female | Legality of Abortion                                                |          | X |          | X |
| Congenital heart anomalies      | Female | Indoor Air Pollution (All Cooking Fuels)                            |          | X |          | X |
| Congenital heart anomalies      | Female | Smoking Prevalence (Reproductive Age Standardised)                  |          | X |          | X |

Appendix Table 12: Comparison of GBD 2013 and GBD 2015 covariates and level of covariates in cause of death modeling

|                                 |        |                                                                     | GBD 2013 |   | GBD 2015 |   |
|---------------------------------|--------|---------------------------------------------------------------------|----------|---|----------|---|
|                                 |        |                                                                     |          |   |          |   |
| Congenital heart anomalies      | Female | Sociodemographic Status                                             |          |   |          | X |
| Congenital heart anomalies      | Female | Rate of congenital heart disease (per 1000 live births)             | X        |   |          |   |
| Cleft lip and cleft palate      | Male   | Alcohol (litres per capita)                                         | X        |   | X        |   |
| Cleft lip and cleft palate      | Male   | Indoor Air Pollution (All Cooking Fuels)                            | X        |   | X        |   |
| Cleft lip and cleft palate      | Male   | Legality of Abortion                                                | X        |   | X        |   |
| Cleft lip and cleft palate      | Male   | Smoking Prevalence (Reproductive Age Standardised)                  | X        |   | X        |   |
| Cleft lip and cleft palate      | Male   | Diabetes Age-Standardised Prevalence (proportion)                   |          | X |          | X |
| Cleft lip and cleft palate      | Male   | Education (years per capita)                                        |          | X |          | X |
| Cleft lip and cleft palate      | Male   | Fruits (kcal per capita)                                            |          | X |          | X |
| Cleft lip and cleft palate      | Male   | Vegetables (kcal per capita)                                        |          | X |          | X |
| Cleft lip and cleft palate      | Male   | Health System Access (capped)                                       |          | X |          | X |
| Cleft lip and cleft palate      | Male   | LDI (IS per capita)                                                 |          | X |          | X |
| Cleft lip and cleft palate      | Male   | Sociodemographic Status                                             |          |   |          | X |
| Cleft lip and cleft palate      | Male   | Measles Vaccine Coverage (proportion)                               |          | X |          |   |
| Cleft lip and cleft palate      | Female | Alcohol (litres per capita)                                         | X        |   | X        |   |
| Cleft lip and cleft palate      | Female | Indoor Air Pollution (All Cooking Fuels)                            | X        |   | X        |   |
| Cleft lip and cleft palate      | Female | Legality of Abortion                                                | X        |   | X        |   |
| Cleft lip and cleft palate      | Female | Smoking Prevalence (Reproductive Age Standardised)                  | X        |   | X        |   |
| Cleft lip and cleft palate      | Female | Diabetes Age-Standardised Prevalence (proportion)                   |          | X |          | X |
| Cleft lip and cleft palate      | Female | Education (years per capita)                                        |          | X |          | X |
| Cleft lip and cleft palate      | Female | Fruits (kcal per capita)                                            |          | X |          | X |
| Cleft lip and cleft palate      | Female | Vegetables (kcal per capita)                                        |          | X |          | X |
| Cleft lip and cleft palate      | Female | Health System Access (capped)                                       |          | X |          | X |
| Cleft lip and cleft palate      | Female | LDI (IS per capita)                                                 |          | X |          | X |
| Cleft lip and cleft palate      | Female | Sociodemographic Status                                             |          |   |          | X |
| Cleft lip and cleft palate      | Female | Measles Vaccine Coverage (proportion)                               |          | X |          |   |
| Down syndrome                   | Male   | Legality of Abortion                                                | X        |   | X        |   |
| Down syndrome                   | Male   | Live Births 35+ (proportion)                                        | X        |   | X        |   |
| Down syndrome                   | Male   | Live Births 40+ (proportion)                                        | X        |   | X        |   |
| Down syndrome                   | Male   | Health System Access 2 (unitless)                                   |          | X |          | X |
| Down syndrome                   | Male   | LDI (IS per capita)                                                 |          | X |          | X |
| Down syndrome                   | Male   | Measles Vaccine Coverage (proportion)                               |          | X |          | X |
| Down syndrome                   | Male   | Alcohol (litres per capita)                                         |          | X |          | X |
| Down syndrome                   | Male   | Education (years per capita)                                        |          | X |          | X |
| Down syndrome                   | Male   | Indoor Air Pollution (All Cooking Fuels)                            |          | X |          | X |
| Down syndrome                   | Male   | Smoking Prevalence (Reproductive Age Standardised)                  |          | X |          | X |
| Down syndrome                   | Male   | Sociodemographic Status                                             |          |   |          | X |
| Down syndrome                   | Female | Legality of Abortion                                                | X        |   | X        |   |
| Down syndrome                   | Female | Live Births 35+ (proportion)                                        | X        |   | X        |   |
| Down syndrome                   | Female | Live Births 40+ (proportion)                                        | X        |   | X        |   |
| Down syndrome                   | Female | Health System Access 2 (unitless)                                   |          | X |          | X |
| Down syndrome                   | Female | LDI (IS per capita)                                                 |          | X |          | X |
| Down syndrome                   | Female | Measles Vaccine Coverage (proportion)                               |          | X |          | X |
| Down syndrome                   | Female | Alcohol (litres per capita)                                         |          | X |          | X |
| Down syndrome                   | Female | Education (years per capita)                                        |          | X |          | X |
| Down syndrome                   | Female | Indoor Air Pollution (All Cooking Fuels)                            |          | X |          | X |
| Down syndrome                   | Female | Smoking Prevalence (Reproductive Age Standardised)                  |          | X |          | X |
| Down syndrome                   | Female | Sociodemographic Status                                             |          |   |          | X |
| Other chromosomal abnormalities | Male   | Legality of Abortion                                                | X        |   | X        |   |
| Other chromosomal abnormalities | Male   | Live Births 35+ (proportion)                                        | X        |   | X        |   |
| Other chromosomal abnormalities | Male   | Live Births 40+ (proportion)                                        | X        |   | X        |   |
| Other chromosomal abnormalities | Male   | Health System Access 2 (unitless)                                   |          | X |          | X |
| Other chromosomal abnormalities | Male   | LDI (IS per capita)                                                 |          | X |          | X |
| Other chromosomal abnormalities | Male   | Measles Vaccine Coverage (proportion)                               |          | X |          | X |
| Other chromosomal abnormalities | Male   | Alcohol (litres per capita)                                         |          | X |          | X |
| Other chromosomal abnormalities | Male   | Education (years per capita)                                        |          | X |          | X |
| Other chromosomal abnormalities | Male   | Indoor Air Pollution (All Cooking Fuels)                            |          | X |          | X |
| Other chromosomal abnormalities | Male   | Smoking Prevalence (Reproductive Age Standardised)                  |          | X |          | X |
| Other chromosomal abnormalities | Male   | Sociodemographic Status                                             |          |   |          | X |
| Other chromosomal abnormalities | Male   | Rate of congenital chromosomal abnormalities (per 1000 live births) | X        |   |          |   |
| Other chromosomal abnormalities | Female | Legality of Abortion                                                | X        |   | X        |   |
| Other chromosomal abnormalities | Female | Live Births 35+ (proportion)                                        | X        |   | X        |   |
| Other chromosomal abnormalities | Female | Live Births 40+ (proportion)                                        | X        |   | X        |   |
| Other chromosomal abnormalities | Female | Health System Access 2 (unitless)                                   |          | X |          | X |
| Other chromosomal abnormalities | Female | LDI (IS per capita)                                                 |          | X |          | X |
| Other chromosomal abnormalities | Female | Measles Vaccine Coverage (proportion)                               |          | X |          | X |
| Other chromosomal abnormalities | Female | Alcohol (litres per capita)                                         |          | X |          | X |
| Other chromosomal abnormalities | Female | Education (years per capita)                                        |          | X |          | X |
| Other chromosomal abnormalities | Female | Indoor Air Pollution (All Cooking Fuels)                            |          | X |          | X |
| Other chromosomal abnormalities | Female | Smoking Prevalence (Reproductive Age Standardised)                  |          | X |          | X |
| Other chromosomal abnormalities | Female | Sociodemographic Status                                             |          |   |          | X |
| Other chromosomal abnormalities | Female | Rate of congenital chromosomal abnormalities (per 1000 live births) | X        |   |          |   |
| Other congenital anomalies      | Male   | Alcohol (litres per capita)                                         |          | X |          | X |
| Other congenital anomalies      | Male   | Diabetes Age-Standardised Prevalence (proportion)                   |          | X |          | X |
| Other congenital anomalies      | Male   | Health System Access 2 (unitless)                                   |          | X |          | X |
| Other congenital anomalies      | Male   | Live Births 35+ (proportion)                                        | X        |   | X        |   |
| Other congenital anomalies      | Male   | Education (years per capita)                                        |          | X |          | X |
| Other congenital anomalies      | Male   | Indoor Air Pollution (All Cooking Fuels)                            |          | X |          | X |
| Other congenital anomalies      | Male   | Legality of Abortion                                                |          | X |          | X |
| Other congenital anomalies      | Male   | Measles Vaccine Coverage (proportion)                               |          | X |          | X |
| Other congenital anomalies      | Male   | Smoking Prevalence (Reproductive Age Standardised)                  |          | X |          | X |
| Other congenital anomalies      | Male   | LDI (IS per capita)                                                 |          | X |          | X |
| Other congenital anomalies      | Male   | Sociodemographic Status                                             |          |   |          | X |
| Other congenital anomalies      | Male   | Rate of congenital chromosomal abnormalities (per 1000 live births) | X        |   |          |   |
| Other congenital anomalies      | Male   | Rate of congenital heart disease (per 1000 live births)             | X        |   |          |   |

Appendix Table 12: Comparison of GBD 2013 and GBD 2015 covariates and level of covariates in cause of death modeling

|                                |        |                                                                     | GBD 2013 |   | GBD 2015 |   |
|--------------------------------|--------|---------------------------------------------------------------------|----------|---|----------|---|
|                                |        |                                                                     |          |   |          |   |
| Other congenital anomalies     | Female | Alcohol (litres per capita)                                         | X        |   | X        |   |
| Other congenital anomalies     | Female | Diabetes Age-Standardised Prevalence (proportion)                   | X        |   | X        |   |
| Other congenital anomalies     | Female | Health System Access 2 (unitless)                                   | X        |   | X        |   |
| Other congenital anomalies     | Female | Live Births 35+ (proportion)                                        | X        |   | X        |   |
| Other congenital anomalies     | Female | Education (years per capita)                                        |          | X |          | X |
| Other congenital anomalies     | Female | Indoor Air Pollution (All Cooking Fuels)                            |          | X |          | X |
| Other congenital anomalies     | Female | Legality of Abortion                                                |          | X |          | X |
| Other congenital anomalies     | Female | Measles Vaccine Coverage (proportion)                               |          | X |          | X |
| Other congenital anomalies     | Female | Smoking Prevalence (Reproductive Age Standardised)                  |          | X |          | X |
| Other congenital anomalies     | Female | LDI (IS per capita)                                                 |          |   | X        |   |
| Other congenital anomalies     | Female | Sociodemographic Status                                             |          |   |          | X |
| Other congenital anomalies     | Female | Rate of congenital chromosomal abnormalities (per 1000 live births) |          | X |          |   |
| Other congenital anomalies     | Female | Rate of congenital heart disease (per 1000 live births)             |          | X |          |   |
| Skin and subcutaneous diseases | Male   | Health System Access 2 (unitless)                                   | X        |   | X        |   |
| Skin and subcutaneous diseases | Male   | Improved Water Source (proportion with access)                      | X        |   | X        |   |
| Skin and subcutaneous diseases | Male   | Malnutrition (proportion <2SD weight for age)                       | X        |   | X        |   |
| Skin and subcutaneous diseases | Male   | SEV unsafe sanitation                                               |          |   | X        |   |
| Skin and subcutaneous diseases | Male   | Alcohol (litres per capita)                                         |          | X |          | X |
| Skin and subcutaneous diseases | Male   | Cumulative Cigarettes (10 Years)                                    |          | X |          | X |
| Skin and subcutaneous diseases | Male   | Cumulative Cigarettes (5 Years)                                     |          | X |          | X |
| Skin and subcutaneous diseases | Male   | Smoking Prevalence                                                  |          | X |          | X |
| Skin and subcutaneous diseases | Male   | Education (years per capita)                                        |          |   | X        |   |
| Skin and subcutaneous diseases | Male   | LDI (IS per capita)                                                 |          |   | X        |   |
| Skin and subcutaneous diseases | Male   | Sociodemographic Status                                             |          |   |          | X |
| Skin and subcutaneous diseases | Male   | Latitude 15 to 30 (proportion)                                      |          |   | X        |   |
| Skin and subcutaneous diseases | Male   | Latitude 30 to 45 (proportion)                                      |          |   | X        |   |
| Skin and subcutaneous diseases | Male   | Latitude Over 45 (proportion)                                       |          |   | X        |   |
| Skin and subcutaneous diseases | Male   | Latitude Under 15 (proportion)                                      |          |   | X        |   |
| Skin and subcutaneous diseases | Male   | Sanitation (proportion with access)                                 | X        |   |          |   |
| Skin and subcutaneous diseases | Female | Health System Access 2 (unitless)                                   | X        |   | X        |   |
| Skin and subcutaneous diseases | Female | Improved Water Source (proportion with access)                      | X        |   | X        |   |
| Skin and subcutaneous diseases | Female | Malnutrition (proportion <2SD weight for age)                       | X        |   | X        |   |
| Skin and subcutaneous diseases | Female | SEV unsafe sanitation                                               |          |   | X        |   |
| Skin and subcutaneous diseases | Female | Alcohol (litres per capita)                                         |          | X |          | X |
| Skin and subcutaneous diseases | Female | Cumulative Cigarettes (10 Years)                                    |          | X |          | X |
| Skin and subcutaneous diseases | Female | Cumulative Cigarettes (5 Years)                                     |          | X |          | X |
| Skin and subcutaneous diseases | Female | Smoking Prevalence                                                  |          | X |          | X |
| Skin and subcutaneous diseases | Female | Education (years per capita)                                        |          |   | X        |   |
| Skin and subcutaneous diseases | Female | LDI (IS per capita)                                                 |          |   | X        |   |
| Skin and subcutaneous diseases | Female | Sociodemographic Status                                             |          |   |          | X |
| Skin and subcutaneous diseases | Female | Latitude 15 to 30 (proportion)                                      |          |   | X        |   |
| Skin and subcutaneous diseases | Female | Latitude 30 to 45 (proportion)                                      |          |   | X        |   |
| Skin and subcutaneous diseases | Female | Latitude Over 45 (proportion)                                       |          |   | X        |   |
| Skin and subcutaneous diseases | Female | Latitude Under 15 (proportion)                                      |          |   | X        |   |
| Skin and subcutaneous diseases | Female | Sanitation (proportion with access)                                 | X        |   |          |   |
| Cellulitis                     | Male   | Health System Access 2 (unitless)                                   | X        |   | X        |   |
| Cellulitis                     | Male   | Improved Water Source (proportion with access)                      | X        |   | X        |   |
| Cellulitis                     | Male   | Malnutrition (proportion <2SD weight for age)                       | X        |   | X        |   |
| Cellulitis                     | Male   | SEV unsafe sanitation                                               |          |   | X        |   |
| Cellulitis                     | Male   | Alcohol (litres per capita)                                         |          | X |          | X |
| Cellulitis                     | Male   | Cumulative Cigarettes (10 Years)                                    |          | X |          | X |
| Cellulitis                     | Male   | Cumulative Cigarettes (5 Years)                                     |          | X |          | X |
| Cellulitis                     | Male   | Smoking Prevalence                                                  |          | X |          | X |
| Cellulitis                     | Male   | Education (years per capita)                                        |          |   | X        |   |
| Cellulitis                     | Male   | LDI (IS per capita)                                                 |          |   | X        |   |
| Cellulitis                     | Male   | Sociodemographic Status                                             |          |   |          | X |
| Cellulitis                     | Male   | Latitude 30 to 45 (proportion)                                      |          |   | X        |   |
| Cellulitis                     | Male   | Latitude Over 45 (proportion)                                       |          |   | X        |   |
| Cellulitis                     | Male   | Latitude Under 15 (proportion)                                      |          |   | X        |   |
| Cellulitis                     | Male   | Population 15 to 30 (proportion)                                    |          |   | X        |   |
| Cellulitis                     | Male   | Sanitation (proportion with access)                                 | X        |   |          |   |
| Cellulitis                     | Female | Health System Access 2 (unitless)                                   | X        |   | X        |   |
| Cellulitis                     | Female | Improved Water Source (proportion with access)                      | X        |   | X        |   |
| Cellulitis                     | Female | Malnutrition (proportion <2SD weight for age)                       | X        |   | X        |   |
| Cellulitis                     | Female | SEV unsafe sanitation                                               |          |   | X        |   |
| Cellulitis                     | Female | Alcohol (litres per capita)                                         |          | X |          | X |
| Cellulitis                     | Female | Cumulative Cigarettes (10 Years)                                    |          | X |          | X |
| Cellulitis                     | Female | Cumulative Cigarettes (5 Years)                                     |          | X |          | X |
| Cellulitis                     | Female | Smoking Prevalence                                                  |          | X |          | X |
| Cellulitis                     | Female | Education (years per capita)                                        |          |   | X        |   |
| Cellulitis                     | Female | LDI (IS per capita)                                                 |          |   | X        |   |
| Cellulitis                     | Female | Sociodemographic Status                                             |          |   |          | X |
| Cellulitis                     | Female | Latitude 30 to 45 (proportion)                                      |          |   | X        |   |
| Cellulitis                     | Female | Latitude Over 45 (proportion)                                       |          |   | X        |   |
| Cellulitis                     | Female | Latitude Under 15 (proportion)                                      |          |   | X        |   |
| Cellulitis                     | Female | Population 15 to 30 (proportion)                                    |          |   | X        |   |
| Cellulitis                     | Female | Sanitation (proportion with access)                                 | X        |   |          |   |
| Pyoderma                       | Male   | Health System Access 2 (unitless)                                   | X        |   | X        |   |
| Pyoderma                       | Male   | Improved Water Source (proportion with access)                      | X        |   | X        |   |
| Pyoderma                       | Male   | Malnutrition (proportion <2SD weight for age)                       | X        |   | X        |   |
| Pyoderma                       | Male   | SEV unsafe sanitation                                               |          |   | X        |   |
| Pyoderma                       | Male   | Alcohol (litres per capita)                                         |          | X |          | X |
| Pyoderma                       | Male   | Cumulative Cigarettes (10 Years)                                    |          | X |          | X |
| Pyoderma                       | Male   | Cumulative Cigarettes (5 Years)                                     |          | X |          | X |
| Pyoderma                       | Male   | Smoking Prevalence                                                  |          | X |          | X |

Appendix Table 12: Comparison of GBD 2013 and GBD 2015 covariates and level of covariates in cause of death modeling

|                                      |        |                                                | GBD 2013 |   | GBD 2015 |   |
|--------------------------------------|--------|------------------------------------------------|----------|---|----------|---|
|                                      |        |                                                |          |   |          |   |
| Pyoderma                             | Male   | Education (years per capita)                   |          | X |          | X |
| Pyoderma                             | Male   | LDI (IS per capita)                            |          | X |          | X |
| Pyoderma                             | Male   | Sociodemographic Status                        |          |   |          | X |
| Pyoderma                             | Male   | Latitude 15 to 30 (proportion)                 |          | X |          |   |
| Pyoderma                             | Male   | Latitude 30 to 45 (proportion)                 |          | X |          |   |
| Pyoderma                             | Male   | Latitude Over 45 (proportion)                  |          | X |          |   |
| Pyoderma                             | Male   | Latitude Under 15 (proportion)                 |          | X |          |   |
| Pyoderma                             | Male   | Sanitation (proportion with access)            | X        |   |          |   |
| Pyoderma                             | Female | Health System Access 2 (unitless)              | X        |   | X        |   |
| Pyoderma                             | Female | Improved Water Source (proportion with access) | X        |   | X        |   |
| Pyoderma                             | Female | Malnutrition (proportion <2SD weight for age)  | X        |   | X        |   |
| Pyoderma                             | Female | SEV unsafe sanitation                          |          |   | X        |   |
| Pyoderma                             | Female | Alcohol (litres per capita)                    | X        |   |          | X |
| Pyoderma                             | Female | Cumulative Cigarettes (10 Years)               | X        |   |          | X |
| Pyoderma                             | Female | Cumulative Cigarettes (5 Years)                | X        |   |          | X |
| Pyoderma                             | Female | Smoking Prevalence                             | X        |   |          | X |
| Pyoderma                             | Female | Education (years per capita)                   |          | X |          | X |
| Pyoderma                             | Female | LDI (IS per capita)                            |          | X |          | X |
| Pyoderma                             | Female | Sociodemographic Status                        |          |   |          | X |
| Pyoderma                             | Female | Latitude 15 to 30 (proportion)                 |          | X |          |   |
| Pyoderma                             | Female | Latitude 30 to 45 (proportion)                 |          | X |          |   |
| Pyoderma                             | Female | Latitude Over 45 (proportion)                  |          | X |          |   |
| Pyoderma                             | Female | Latitude Under 15 (proportion)                 |          | X |          |   |
| Pyoderma                             | Female | Sanitation (proportion with access)            | X        |   |          |   |
| Decubitus ulcer                      | Male   | Improved Water Source (proportion with access) | X        |   | X        |   |
| Decubitus ulcer                      | Male   | Malnutrition (proportion <2SD weight for age)  | X        |   | X        |   |
| Decubitus ulcer                      | Male   | SEV unsafe sanitation                          |          |   | X        |   |
| Decubitus ulcer                      | Male   | Alcohol (litres per capita)                    | X        |   |          | X |
| Decubitus ulcer                      | Male   | Cumulative Cigarettes (10 Years)               | X        |   |          | X |
| Decubitus ulcer                      | Male   | Cumulative Cigarettes (5 Years)                | X        |   |          | X |
| Decubitus ulcer                      | Male   | Health System Access 2 (unitless)              | X        |   |          | X |
| Decubitus ulcer                      | Male   | Smoking Prevalence                             | X        |   |          | X |
| Decubitus ulcer                      | Male   | Education (years per capita)                   |          | X |          | X |
| Decubitus ulcer                      | Male   | LDI (IS per capita)                            |          | X |          | X |
| Decubitus ulcer                      | Male   | Sociodemographic Status                        |          |   |          | X |
| Decubitus ulcer                      | Male   | Latitude 15 to 30 (proportion)                 |          | X |          |   |
| Decubitus ulcer                      | Male   | Latitude 30 to 45 (proportion)                 |          | X |          |   |
| Decubitus ulcer                      | Male   | Latitude Over 45 (proportion)                  |          | X |          |   |
| Decubitus ulcer                      | Male   | Latitude Under 15 (proportion)                 |          | X |          |   |
| Decubitus ulcer                      | Male   | Sanitation (proportion with access)            | X        |   |          |   |
| Decubitus ulcer                      | Female | Improved Water Source (proportion with access) | X        |   | X        |   |
| Decubitus ulcer                      | Female | Malnutrition (proportion <2SD weight for age)  | X        |   | X        |   |
| Decubitus ulcer                      | Female | SEV unsafe sanitation                          |          |   | X        |   |
| Decubitus ulcer                      | Female | Alcohol (litres per capita)                    | X        |   |          | X |
| Decubitus ulcer                      | Female | Cumulative Cigarettes (10 Years)               | X        |   |          | X |
| Decubitus ulcer                      | Female | Cumulative Cigarettes (5 Years)                | X        |   |          | X |
| Decubitus ulcer                      | Female | Health System Access 2 (unitless)              | X        |   |          | X |
| Decubitus ulcer                      | Female | Smoking Prevalence                             | X        |   |          | X |
| Decubitus ulcer                      | Female | Education (years per capita)                   |          | X |          | X |
| Decubitus ulcer                      | Female | LDI (IS per capita)                            |          | X |          | X |
| Decubitus ulcer                      | Female | Sociodemographic Status                        |          |   |          | X |
| Decubitus ulcer                      | Female | Latitude 15 to 30 (proportion)                 |          | X |          |   |
| Decubitus ulcer                      | Female | Latitude 30 to 45 (proportion)                 |          | X |          |   |
| Decubitus ulcer                      | Female | Latitude Over 45 (proportion)                  |          | X |          |   |
| Decubitus ulcer                      | Female | Latitude Under 15 (proportion)                 |          | X |          |   |
| Decubitus ulcer                      | Female | Sanitation (proportion with access)            | X        |   |          |   |
| Other skin and subcutaneous diseases | Male   | Improved Water Source (proportion with access) | X        |   | X        |   |
| Other skin and subcutaneous diseases | Male   | Malnutrition (proportion <2SD weight for age)  | X        |   | X        |   |
| Other skin and subcutaneous diseases | Male   | SEV unsafe sanitation                          |          |   | X        |   |
| Other skin and subcutaneous diseases | Male   | Alcohol (litres per capita)                    | X        |   |          | X |
| Other skin and subcutaneous diseases | Male   | Cumulative Cigarettes (10 Years)               | X        |   |          | X |
| Other skin and subcutaneous diseases | Male   | Cumulative Cigarettes (5 Years)                | X        |   |          | X |
| Other skin and subcutaneous diseases | Male   | Health System Access 2 (unitless)              | X        |   |          | X |
| Other skin and subcutaneous diseases | Male   | Smoking Prevalence                             | X        |   |          | X |
| Other skin and subcutaneous diseases | Male   | Education (years per capita)                   |          | X |          | X |
| Other skin and subcutaneous diseases | Male   | LDI (IS per capita)                            |          | X |          | X |
| Other skin and subcutaneous diseases | Male   | Sociodemographic Status                        |          |   |          | X |
| Other skin and subcutaneous diseases | Male   | Latitude 15 to 30 (proportion)                 |          | X |          |   |
| Other skin and subcutaneous diseases | Male   | Latitude 30 to 45 (proportion)                 |          | X |          |   |
| Other skin and subcutaneous diseases | Male   | Latitude Over 45 (proportion)                  |          | X |          |   |
| Other skin and subcutaneous diseases | Male   | Latitude Under 15 (proportion)                 |          | X |          |   |
| Other skin and subcutaneous diseases | Male   | Sanitation (proportion with access)            | X        |   |          |   |
| Other skin and subcutaneous diseases | Female | Improved Water Source (proportion with access) | X        |   | X        |   |
| Other skin and subcutaneous diseases | Female | Malnutrition (proportion <2SD weight for age)  | X        |   | X        |   |
| Other skin and subcutaneous diseases | Female | SEV unsafe sanitation                          |          |   | X        |   |
| Other skin and subcutaneous diseases | Female | Alcohol (litres per capita)                    | X        |   |          | X |
| Other skin and subcutaneous diseases | Female | Cumulative Cigarettes (10 Years)               | X        |   |          | X |
| Other skin and subcutaneous diseases | Female | Cumulative Cigarettes (5 Years)                | X        |   |          | X |
| Other skin and subcutaneous diseases | Female | Health System Access 2 (unitless)              | X        |   |          | X |
| Other skin and subcutaneous diseases | Female | Smoking Prevalence                             | X        |   |          | X |
| Other skin and subcutaneous diseases | Female | Education (years per capita)                   |          | X |          | X |
| Other skin and subcutaneous diseases | Female | LDI (IS per capita)                            |          | X |          | X |
| Other skin and subcutaneous diseases | Female | Sociodemographic Status                        |          |   |          | X |
| Other skin and subcutaneous diseases | Female | Latitude 15 to 30 (proportion)                 |          | X |          |   |
| Other skin and subcutaneous diseases | Female | Latitude 30 to 45 (proportion)                 |          | X |          |   |

Appendix Table 12: Comparison of GBD 2013 and GBD 2015 covariates and level of covariates in cause of death modeling

|                                      |        |                                                    | GBD 2013 |   | GBD 2015 |   |
|--------------------------------------|--------|----------------------------------------------------|----------|---|----------|---|
|                                      |        |                                                    |          |   |          |   |
| Other skin and subcutaneous diseases | Female | Latitude Over 45 (proportion)                      |          | X |          |   |
| Other skin and subcutaneous diseases | Female | Latitude Under 15 (proportion)                     |          | X |          |   |
| Other skin and subcutaneous diseases | Female | Sanitation (proportion with access)                | X        |   |          |   |
| Sudden infant death syndrome         | Male   | Health System Access 2 (unitless)                  | X        |   | X        |   |
| Sudden infant death syndrome         | Male   | In-Facility Delivery (proportion)                  | X        |   | X        |   |
| Sudden infant death syndrome         | Male   | Indoor Air Pollution (All Cooking Fuels)           | X        |   | X        |   |
| Sudden infant death syndrome         | Male   | Smoking Prevalence (Reproductive Age Standardised) | X        |   | X        |   |
| Sudden infant death syndrome         | Male   | Malnutrition (proportion <2SD weight for age)      |          | X |          | X |
| Sudden infant death syndrome         | Male   | Skilled Birth Attendance (proportion)              |          | X |          | X |
| Sudden infant death syndrome         | Male   | Education (years per capita)                       |          | X |          | X |
| Sudden infant death syndrome         | Male   | LDI (IS per capita)                                |          | X |          | X |
| Sudden infant death syndrome         | Male   | Sociodemographic Status                            |          |   |          | X |
| Sudden infant death syndrome         | Male   | Total Fertility Rate                               |          | X |          | X |
| Sudden infant death syndrome         | Male   | HIV Prevalence, ARV-Adjusted (Custom Lag, %)       |          | X |          |   |
| Sudden infant death syndrome         | Female | Health System Access 2 (unitless)                  | X        |   | X        |   |
| Sudden infant death syndrome         | Female | In-Facility Delivery (proportion)                  | X        |   | X        |   |
| Sudden infant death syndrome         | Female | Indoor Air Pollution (All Cooking Fuels)           | X        |   | X        |   |
| Sudden infant death syndrome         | Female | Smoking Prevalence (Reproductive Age Standardised) | X        |   | X        |   |
| Sudden infant death syndrome         | Female | Malnutrition (proportion <2SD weight for age)      |          | X |          | X |
| Sudden infant death syndrome         | Female | Skilled Birth Attendance (proportion)              |          | X |          | X |
| Sudden infant death syndrome         | Female | Education (years per capita)                       |          | X |          | X |
| Sudden infant death syndrome         | Female | LDI (IS per capita)                                |          | X |          | X |
| Sudden infant death syndrome         | Female | Sociodemographic Status                            |          |   |          | X |
| Sudden infant death syndrome         | Female | Total Fertility Rate                               |          | X |          | X |
| Sudden infant death syndrome         | Female | HIV Prevalence, ARV-Adjusted (Custom Lag, %)       |          | X |          |   |
| Transport injuries                   | Male   | Alcohol (litres per capita)                        | X        |   | X        |   |
| Transport injuries                   | Male   | Health System Access 2 (unitless)                  | X        |   | X        |   |
| Transport injuries                   | Male   | Vehicles - 2 wheels fraction (proportion)          | X        |   | X        |   |
| Transport injuries                   | Male   | Vehicles - 2+4 wheels (per capita)                 | X        |   | X        |   |
| Transport injuries                   | Male   | LDI (IS per capita)                                |          | X |          | X |
| Transport injuries                   | Male   | Population Density (300-500 ppl/sqkm, proportion)  |          | X |          | X |
| Transport injuries                   | Male   | Population Density (500-1000 ppl/sqkm, proportion) |          | X |          | X |
| Transport injuries                   | Male   | Education (years per capita)                       |          | X |          | X |
| Transport injuries                   | Male   | Rainfall Quintile 5 (proportion)                   |          | X |          | X |
| Transport injuries                   | Male   | Sociodemographic Status                            |          |   |          | X |
| Transport injuries                   | Female | Alcohol (litres per capita)                        | X        |   | X        |   |
| Transport injuries                   | Female | Health System Access 2 (unitless)                  | X        |   | X        |   |
| Transport injuries                   | Female | Vehicles - 2 wheels fraction (proportion)          | X        |   | X        |   |
| Transport injuries                   | Female | Vehicles - 2+4 wheels (per capita)                 | X        |   | X        |   |
| Transport injuries                   | Female | LDI (IS per capita)                                |          | X |          | X |
| Transport injuries                   | Female | Population Density (300-500 ppl/sqkm, proportion)  |          | X |          | X |
| Transport injuries                   | Female | Population Density (500-1000 ppl/sqkm, proportion) |          | X |          | X |
| Transport injuries                   | Female | Education (years per capita)                       |          | X |          | X |
| Transport injuries                   | Female | Rainfall Quintile 5 (proportion)                   |          | X |          | X |
| Transport injuries                   | Female | Sociodemographic Status                            |          |   |          | X |
| Road injuries                        | Male   | Alcohol (litres per capita)                        | X        |   | X        |   |
| Road injuries                        | Male   | Health System Access 2 (unitless)                  | X        |   | X        |   |
| Road injuries                        | Male   | Log-transformed SEV scalar: Road Inj               |          |   | X        |   |
| Road injuries                        | Male   | Vehicles - 2 wheels (per capita)                   | X        |   | X        |   |
| Road injuries                        | Male   | Vehicles - 2 wheels fraction (proportion)          | X        |   | X        |   |
| Road injuries                        | Male   | Vehicles - 2+4 wheels (per capita)                 | X        |   | X        |   |
| Road injuries                        | Male   | Vehicles - 4 wheels (per capita)                   | X        |   | X        |   |
| Road injuries                        | Male   | LDI (IS per capita)                                |          | X |          | X |
| Road injuries                        | Male   | Population 15 to 30 (proportion)                   |          | X |          | X |
| Road injuries                        | Male   | Population Density (300-500 ppl/sqkm, proportion)  |          | X |          | X |
| Road injuries                        | Male   | Population Density (500-1000 ppl/sqkm, proportion) |          | X |          | X |
| Road injuries                        | Male   | Education (years per capita)                       |          | X |          | X |
| Road injuries                        | Male   | Sociodemographic Status                            |          |   |          | X |
| Road injuries                        | Female | Alcohol (litres per capita)                        | X        |   | X        |   |
| Road injuries                        | Female | Health System Access 2 (unitless)                  | X        |   | X        |   |
| Road injuries                        | Female | Log-transformed SEV scalar: Road Inj               |          |   | X        |   |
| Road injuries                        | Female | Vehicles - 2 wheels (per capita)                   | X        |   | X        |   |
| Road injuries                        | Female | Vehicles - 2 wheels fraction (proportion)          | X        |   | X        |   |
| Road injuries                        | Female | Vehicles - 2+4 wheels (per capita)                 | X        |   | X        |   |
| Road injuries                        | Female | Vehicles - 4 wheels (per capita)                   | X        |   | X        |   |
| Road injuries                        | Female | LDI (IS per capita)                                |          | X |          | X |
| Road injuries                        | Female | Population 15 to 30 (proportion)                   |          | X |          | X |
| Road injuries                        | Female | Population Density (300-500 ppl/sqkm, proportion)  |          | X |          | X |
| Road injuries                        | Female | Population Density (500-1000 ppl/sqkm, proportion) |          | X |          | X |
| Road injuries                        | Female | Education (years per capita)                       |          | X |          | X |
| Road injuries                        | Female | Sociodemographic Status                            |          |   |          | X |
| Pedestrian road injuries             | Male   | Alcohol (litres per capita)                        | X        |   | X        |   |
| Pedestrian road injuries             | Male   | Health System Access 2 (unitless)                  | X        |   | X        |   |
| Pedestrian road injuries             | Male   | Log-transformed SEV scalar: Pedest                 |          |   | X        |   |
| Pedestrian road injuries             | Male   | Vehicles - 2 wheels fraction (proportion)          | X        |   | X        |   |
| Pedestrian road injuries             | Male   | Vehicles - 2+4 wheels (per capita)                 | X        |   | X        |   |
| Pedestrian road injuries             | Male   | LDI (IS per capita)                                |          | X |          | X |
| Pedestrian road injuries             | Male   | Population Density (300-500 ppl/sqkm, proportion)  |          | X |          | X |
| Pedestrian road injuries             | Male   | Population Density (500-1000 ppl/sqkm, proportion) |          | X |          | X |
| Pedestrian road injuries             | Male   | Education (years per capita)                       |          | X |          | X |
| Pedestrian road injuries             | Male   | Rainfall Quintile 5 (proportion)                   |          | X |          | X |
| Pedestrian road injuries             | Male   | Sociodemographic Status                            |          |   |          | X |
| Pedestrian road injuries             | Female | Alcohol (litres per capita)                        | X        |   | X        |   |
| Pedestrian road injuries             | Female | Health System Access 2 (unitless)                  | X        |   | X        |   |
| Pedestrian road injuries             | Female | Log-transformed SEV scalar: Pedest                 |          |   | X        |   |

Appendix Table 12: Comparison of GBD 2013 and GBD 2015 covariates and level of covariates in cause of death modeling

|                             |        |                                                    | GBD 2013 |   |   | GBD 2015 |   |   |
|-----------------------------|--------|----------------------------------------------------|----------|---|---|----------|---|---|
|                             |        |                                                    |          |   |   |          |   |   |
| Pedestrian road injuries    | Female | Vehicles - 2 wheels fraction (proportion)          | X        |   |   | X        |   |   |
| Pedestrian road injuries    | Female | Vehicles - 2+4 wheels (per capita)                 | X        |   |   | X        |   |   |
| Pedestrian road injuries    | Female | LDI (IS per capita)                                |          | X |   |          | X |   |
| Pedestrian road injuries    | Female | Population Density (300-500 ppl/sqkm, proportion)  |          | X |   |          | X |   |
| Pedestrian road injuries    | Female | Population Density (500-1000 ppl/sqkm, proportion) |          | X |   |          | X |   |
| Pedestrian road injuries    | Female | Education (years per capita)                       |          |   | X |          |   | X |
| Pedestrian road injuries    | Female | Rainfall Quintile 5 (proportion)                   |          |   | X |          |   | X |
| Pedestrian road injuries    | Female | Sociodemographic Status                            |          |   |   |          |   | X |
| Cyclist road injuries       | Male   | Alcohol (litres per capita)                        | X        |   |   | X        |   |   |
| Cyclist road injuries       | Male   | Health System Access 2 (unitless)                  | X        |   |   | X        |   |   |
| Cyclist road injuries       | Male   | Log-transformed SEV scalar: Cyclist                |          |   |   | X        |   |   |
| Cyclist road injuries       | Male   | Vehicles - 2 wheels fraction (proportion)          | X        |   |   | X        |   |   |
| Cyclist road injuries       | Male   | Vehicles - 2+4 wheels (per capita)                 | X        |   |   | X        |   |   |
| Cyclist road injuries       | Male   | LDI (IS per capita)                                |          | X |   |          | X |   |
| Cyclist road injuries       | Male   | Population Density (300-500 ppl/sqkm, proportion)  |          | X |   |          | X |   |
| Cyclist road injuries       | Male   | Population Density (500-1000 ppl/sqkm, proportion) |          | X |   |          | X |   |
| Cyclist road injuries       | Male   | Education (years per capita)                       |          |   | X |          |   | X |
| Cyclist road injuries       | Male   | Sociodemographic Status                            |          |   |   |          |   | X |
| Cyclist road injuries       | Female | Alcohol (litres per capita)                        | X        |   |   | X        |   |   |
| Cyclist road injuries       | Female | Health System Access 2 (unitless)                  | X        |   |   | X        |   |   |
| Cyclist road injuries       | Female | Log-transformed SEV scalar: Cyclist                |          |   |   | X        |   |   |
| Cyclist road injuries       | Female | Vehicles - 2 wheels fraction (proportion)          | X        |   |   | X        |   |   |
| Cyclist road injuries       | Female | Vehicles - 2+4 wheels (per capita)                 | X        |   |   | X        |   |   |
| Cyclist road injuries       | Female | LDI (IS per capita)                                |          | X |   |          | X |   |
| Cyclist road injuries       | Female | Population Density (300-500 ppl/sqkm, proportion)  |          | X |   |          | X |   |
| Cyclist road injuries       | Female | Population Density (500-1000 ppl/sqkm, proportion) |          | X |   |          | X |   |
| Cyclist road injuries       | Female | Education (years per capita)                       |          |   | X |          |   | X |
| Cyclist road injuries       | Female | Sociodemographic Status                            |          |   |   |          |   | X |
| Motorcyclist road injuries  | Male   | Alcohol (litres per capita)                        | X        |   |   | X        |   |   |
| Motorcyclist road injuries  | Male   | Health System Access 2 (unitless)                  | X        |   |   | X        |   |   |
| Motorcyclist road injuries  | Male   | Log-transformed SEV scalar: Mot Cyc                |          |   |   | X        |   |   |
| Motorcyclist road injuries  | Male   | Vehicles - 2 wheels (per capita)                   | X        |   |   | X        |   |   |
| Motorcyclist road injuries  | Male   | LDI (IS per capita)                                |          | X |   |          | X |   |
| Motorcyclist road injuries  | Male   | Population Density (300-500 ppl/sqkm, proportion)  |          | X |   |          | X |   |
| Motorcyclist road injuries  | Male   | Population Density (500-1000 ppl/sqkm, proportion) |          | X |   |          | X |   |
| Motorcyclist road injuries  | Male   | Education (years per capita)                       |          |   | X |          |   | X |
| Motorcyclist road injuries  | Male   | Rainfall Quintile 5 (proportion)                   |          |   | X |          |   | X |
| Motorcyclist road injuries  | Male   | Sociodemographic Status                            |          |   |   |          |   | X |
| Motorcyclist road injuries  | Female | Alcohol (litres per capita)                        | X        |   |   | X        |   |   |
| Motorcyclist road injuries  | Female | Health System Access 2 (unitless)                  | X        |   |   | X        |   |   |
| Motorcyclist road injuries  | Female | Log-transformed SEV scalar: Mot Cyc                |          |   |   | X        |   |   |
| Motorcyclist road injuries  | Female | Vehicles - 2 wheels (per capita)                   | X        |   |   | X        |   |   |
| Motorcyclist road injuries  | Female | LDI (IS per capita)                                |          | X |   |          | X |   |
| Motorcyclist road injuries  | Female | Population Density (300-500 ppl/sqkm, proportion)  |          | X |   |          | X |   |
| Motorcyclist road injuries  | Female | Population Density (500-1000 ppl/sqkm, proportion) |          | X |   |          | X |   |
| Motorcyclist road injuries  | Female | Education (years per capita)                       |          |   | X |          |   | X |
| Motorcyclist road injuries  | Female | Rainfall Quintile 5 (proportion)                   |          |   | X |          |   | X |
| Motorcyclist road injuries  | Female | Sociodemographic Status                            |          |   |   |          |   | X |
| Motor vehicle road injuries | Male   | Alcohol (litres per capita)                        | X        |   |   | X        |   |   |
| Motor vehicle road injuries | Male   | Health System Access 2 (unitless)                  | X        |   |   | X        |   |   |
| Motor vehicle road injuries | Male   | Log-transformed SEV scalar: Mot Veh                |          |   |   | X        |   |   |
| Motor vehicle road injuries | Male   | Vehicles - 4 wheels (per capita)                   | X        |   |   | X        |   |   |
| Motor vehicle road injuries | Male   | LDI (IS per capita)                                |          | X |   |          | X |   |
| Motor vehicle road injuries | Male   | Population Density (300-500 ppl/sqkm, proportion)  |          | X |   |          | X |   |
| Motor vehicle road injuries | Male   | Population Density (500-1000 ppl/sqkm, proportion) |          | X |   |          | X |   |
| Motor vehicle road injuries | Male   | Education (years per capita)                       |          |   | X |          |   | X |
| Motor vehicle road injuries | Male   | Rainfall Quintile 5 (proportion)                   |          |   | X |          |   | X |
| Motor vehicle road injuries | Male   | Sociodemographic Status                            |          |   |   |          |   | X |
| Motor vehicle road injuries | Female | Alcohol (litres per capita)                        | X        |   |   | X        |   |   |
| Motor vehicle road injuries | Female | Health System Access 2 (unitless)                  | X        |   |   | X        |   |   |
| Motor vehicle road injuries | Female | Log-transformed SEV scalar: Mot Veh                |          |   |   | X        |   |   |
| Motor vehicle road injuries | Female | Vehicles - 4 wheels (per capita)                   | X        |   |   | X        |   |   |
| Motor vehicle road injuries | Female | LDI (IS per capita)                                |          | X |   |          | X |   |
| Motor vehicle road injuries | Female | Population Density (300-500 ppl/sqkm, proportion)  |          | X |   |          | X |   |
| Motor vehicle road injuries | Female | Population Density (500-1000 ppl/sqkm, proportion) |          | X |   |          | X |   |
| Motor vehicle road injuries | Female | Education (years per capita)                       |          |   | X |          |   | X |
| Motor vehicle road injuries | Female | Rainfall Quintile 5 (proportion)                   |          |   | X |          |   | X |
| Motor vehicle road injuries | Female | Sociodemographic Status                            |          |   |   |          |   | X |
| Other road injuries         | Male   | Alcohol (litres per capita)                        | X        |   |   | X        |   |   |
| Other road injuries         | Male   | Health System Access 2 (unitless)                  | X        |   |   | X        |   |   |
| Other road injuries         | Male   | Log-transformed SEV scalar: Oth Road               |          |   |   | X        |   |   |
| Other road injuries         | Male   | Vehicles - 2 wheels fraction (proportion)          | X        |   |   | X        |   |   |
| Other road injuries         | Male   | Vehicles - 2+4 wheels (per capita)                 | X        |   |   | X        |   |   |
| Other road injuries         | Male   | LDI (IS per capita)                                |          | X |   |          | X |   |
| Other road injuries         | Male   | Rainfall Quintile 5 (proportion)                   |          |   | X |          |   | X |
| Other road injuries         | Male   | Sociodemographic Status                            |          |   |   |          |   | X |
| Other road injuries         | Female | Alcohol (litres per capita)                        | X        |   |   | X        |   |   |
| Other road injuries         | Female | Health System Access 2 (unitless)                  | X        |   |   | X        |   |   |
| Other road injuries         | Female | Log-transformed SEV scalar: Oth Road               |          |   |   | X        |   |   |
| Other road injuries         | Female | Vehicles - 2 wheels fraction (proportion)          | X        |   |   | X        |   |   |
| Other road injuries         | Female | Vehicles - 2+4 wheels (per capita)                 | X        |   |   | X        |   |   |
| Other road injuries         | Female | LDI (IS per capita)                                |          | X |   |          | X |   |
| Other road injuries         | Female | Rainfall Quintile 5 (proportion)                   |          |   | X |          |   | X |
| Other road injuries         | Female | Sociodemographic Status                            |          |   |   |          |   | X |
| Other transport injuries    | Male   | Alcohol (litres per capita)                        | X        |   |   | X        |   |   |

Appendix Table 12: Comparison of GBD 2013 and GBD 2015 covariates and level of covariates in cause of death modeling

|                                |        |                                                     | GBD 2013 |   |   | GBD 2015 |   |   |
|--------------------------------|--------|-----------------------------------------------------|----------|---|---|----------|---|---|
|                                |        |                                                     |          |   |   |          |   |   |
| Other transport injuries       | Male   | Health System Access 2 (unitless)                   | X        |   |   | X        |   |   |
| Other transport injuries       | Male   | Log-transformed SEV scalar: Oth Trans               |          |   |   | X        |   |   |
| Other transport injuries       | Male   | Vehicles - 2 wheels fraction (proportion)           | X        |   |   | X        |   |   |
| Other transport injuries       | Male   | Vehicles - 2+4 wheels (per capita)                  | X        |   |   | X        |   |   |
| Other transport injuries       | Male   | Population Density (300-500 ppl/sqkm, proportion)   |          | X |   |          | X |   |
| Other transport injuries       | Male   | Population Density (500-1000 ppl/sqkm, proportion)  |          | X |   |          | X |   |
| Other transport injuries       | Male   | Education (years per capita)                        |          |   | X |          |   | X |
| Other transport injuries       | Male   | LDI (IS per capita)                                 |          |   | X |          |   | X |
| Other transport injuries       | Male   | Rainfall Quintile 5 (proportion)                    |          |   | X |          |   | X |
| Other transport injuries       | Male   | Sociodemographic Status                             |          |   |   |          |   | X |
| Other transport injuries       | Female | Alcohol (litres per capita)                         | X        |   |   | X        |   |   |
| Other transport injuries       | Female | Health System Access 2 (unitless)                   | X        |   |   | X        |   |   |
| Other transport injuries       | Female | Log-transformed SEV scalar: Oth Trans               |          |   |   | X        |   |   |
| Other transport injuries       | Female | Vehicles - 2 wheels fraction (proportion)           | X        |   |   | X        |   |   |
| Other transport injuries       | Female | Vehicles - 2+4 wheels (per capita)                  | X        |   |   | X        |   |   |
| Other transport injuries       | Female | Population Density (300-500 ppl/sqkm, proportion)   |          | X |   |          | X |   |
| Other transport injuries       | Female | Population Density (500-1000 ppl/sqkm, proportion)  |          | X |   |          | X |   |
| Other transport injuries       | Female | Education (years per capita)                        |          |   | X |          |   | X |
| Other transport injuries       | Female | LDI (IS per capita)                                 |          |   | X |          |   | X |
| Other transport injuries       | Female | Rainfall Quintile 5 (proportion)                    |          |   | X |          |   | X |
| Other transport injuries       | Female | Sociodemographic Status                             |          |   |   |          |   | X |
| Falls                          | Male   | Alcohol (litres per capita)                         | X        |   |   | X        |   |   |
| Falls                          | Male   | Health System Access 2 (unitless)                   | X        |   |   | X        |   |   |
| Falls                          | Male   | Log-transformed SEV scalar: Falls                   |          |   |   | X        |   |   |
| Falls                          | Male   | In-Milk (kcal per capita)                           |          | X |   |          | X |   |
| Falls                          | Male   | Elevation Over 1500m (proportion)                   |          |   | X |          |   | X |
| Falls                          | Male   | LDI (IS per capita)                                 |          |   | X |          |   | X |
| Falls                          | Male   | Sociodemographic Status                             |          |   |   |          |   | X |
| Falls                          | Female | Alcohol (litres per capita)                         | X        |   |   | X        |   |   |
| Falls                          | Female | Health System Access 2 (unitless)                   | X        |   |   | X        |   |   |
| Falls                          | Female | Log-transformed SEV scalar: Falls                   |          |   |   | X        |   |   |
| Falls                          | Female | In-Milk (kcal per capita)                           |          | X |   |          | X |   |
| Falls                          | Female | Elevation Over 1500m (proportion)                   |          |   | X |          |   | X |
| Falls                          | Female | LDI (IS per capita)                                 |          |   | X |          |   | X |
| Falls                          | Female | Sociodemographic Status                             |          |   |   |          |   | X |
| Drowning                       | Male   | Alcohol (litres per capita)                         | X        |   |   | X        |   |   |
| Drowning                       | Male   | Coastal Population within 10km (proportion)         | X        |   |   | X        |   |   |
| Drowning                       | Male   | Landlocked Nation (binary)                          | X        |   |   | X        |   |   |
| Drowning                       | Male   | Log-transformed SEV scalar: Drown                   |          |   |   | X        |   |   |
| Drowning                       | Male   | Rainfall Quintile 1 (proportion)                    | X        |   |   | X        |   |   |
| Drowning                       | Male   | Rainfall Quintile 5 (proportion)                    | X        |   |   | X        |   |   |
| Drowning                       | Male   | Elevation Under 100m (proportion)                   |          | X |   |          | X |   |
| Drowning                       | Male   | Education (years per capita)                        |          |   | X |          |   | X |
| Drowning                       | Male   | LDI (IS per capita)                                 |          |   | X |          |   | X |
| Drowning                       | Male   | Sociodemographic Status                             |          |   |   |          |   | X |
| Drowning                       | Female | Alcohol (litres per capita)                         | X        |   |   | X        |   |   |
| Drowning                       | Female | Coastal Population within 10km (proportion)         | X        |   |   | X        |   |   |
| Drowning                       | Female | Landlocked Nation (binary)                          | X        |   |   | X        |   |   |
| Drowning                       | Female | Log-transformed SEV scalar: Drown                   |          |   |   | X        |   |   |
| Drowning                       | Female | Rainfall Quintile 1 (proportion)                    | X        |   |   | X        |   |   |
| Drowning                       | Female | Rainfall Quintile 5 (proportion)                    | X        |   |   | X        |   |   |
| Drowning                       | Female | Elevation Under 100m (proportion)                   |          | X |   |          | X |   |
| Drowning                       | Female | Education (years per capita)                        |          |   | X |          |   | X |
| Drowning                       | Female | LDI (IS per capita)                                 |          |   | X |          |   | X |
| Drowning                       | Female | Sociodemographic Status                             |          |   |   |          |   | X |
| Fire, heat, and hot substances | Male   | Health System Access 2 (unitless)                   | X        |   |   | X        |   |   |
| Fire, heat, and hot substances | Male   | Log-transformed SEV scalar: Fire                    |          |   |   | X        |   |   |
| Fire, heat, and hot substances | Male   | Alcohol (litres per capita)                         |          | X |   |          | X |   |
| Fire, heat, and hot substances | Male   | Indoor Air Pollution (Biomass Cooking)              |          | X |   |          | X |   |
| Fire, heat, and hot substances | Male   | Population Density (over 1000 ppl/sqkm, proportion) |          | X |   |          | X |   |
| Fire, heat, and hot substances | Male   | Tobacco (cigarettes per capita)                     |          | X |   |          | X |   |
| Fire, heat, and hot substances | Male   | Education (years per capita)                        |          |   | X |          |   | X |
| Fire, heat, and hot substances | Male   | LDI (IS per capita)                                 |          |   | X |          |   | X |
| Fire, heat, and hot substances | Male   | Sociodemographic Status                             |          |   |   |          |   | X |
| Fire, heat, and hot substances | Female | Health System Access 2 (unitless)                   | X        |   |   | X        |   |   |
| Fire, heat, and hot substances | Female | Log-transformed SEV scalar: Fire                    |          |   |   | X        |   |   |
| Fire, heat, and hot substances | Female | Alcohol (litres per capita)                         |          | X |   |          | X |   |
| Fire, heat, and hot substances | Female | Indoor Air Pollution (Biomass Cooking)              |          | X |   |          | X |   |
| Fire, heat, and hot substances | Female | Population Density (over 1000 ppl/sqkm, proportion) |          | X |   |          | X |   |
| Fire, heat, and hot substances | Female | Tobacco (cigarettes per capita)                     |          | X |   |          | X |   |
| Fire, heat, and hot substances | Female | Education (years per capita)                        |          |   | X |          |   | X |
| Fire, heat, and hot substances | Female | LDI (IS per capita)                                 |          |   | X |          |   | X |
| Fire, heat, and hot substances | Female | Sociodemographic Status                             |          |   |   |          |   | X |
| Poisonings                     | Male   | Health System Access 2 (unitless)                   | X        |   |   | X        |   |   |
| Poisonings                     | Male   | Log-transformed SEV scalar: Poison                  |          |   |   | X        |   |   |
| Poisonings                     | Male   | Opium Cultivation (binary)                          | X        |   |   | X        |   |   |
| Poisonings                     | Male   | Population Density (over 1000 ppl/sqkm, proportion) |          | X |   |          | X |   |
| Poisonings                     | Male   | Population Density (under 150 ppl/sqkm, proportion) |          | X |   |          | X |   |
| Poisonings                     | Male   | Education (years per capita)                        |          |   | X |          |   | X |
| Poisonings                     | Male   | LDI (IS per capita)                                 |          |   | X |          |   | X |
| Poisonings                     | Male   | Sociodemographic Status                             |          |   |   |          |   | X |
| Poisonings                     | Female | Health System Access 2 (unitless)                   | X        |   |   | X        |   |   |
| Poisonings                     | Female | Log-transformed SEV scalar: Poison                  |          |   |   | X        |   |   |
| Poisonings                     | Female | Opium Cultivation (binary)                          | X        |   |   | X        |   |   |
| Poisonings                     | Female | Population Density (over 1000 ppl/sqkm, proportion) |          | X |   |          | X |   |



Appendix Table 12: Comparison of GBD 2013 and GBD 2015 covariates and level of covariates in cause of death modeling

|                                      |        |                                                     | GBD 2013 |   | GBD 2015 |   |
|--------------------------------------|--------|-----------------------------------------------------|----------|---|----------|---|
|                                      |        |                                                     |          |   |          |   |
| Poisonings                           | Female | Population Density (under 150 ppl/sqkm, proportion) |          | X |          | X |
| Poisonings                           | Female | Education (years per capita)                        |          | X |          | X |
| Poisonings                           | Female | LDI (IS per capita)                                 |          |   | X        | X |
| Poisonings                           | Female | Sociodemographic Status                             |          |   |          | X |
| Unintentional firearm injuries       | Male   | Log-transformed SEV scalar: Mech Gun                |          |   | X        |   |
| Unintentional firearm injuries       | Male   | Alcohol (litres per capita)                         |          | X |          | X |
| Unintentional firearm injuries       | Male   | Health System Access (unitless)                     |          | X |          | X |
| Unintentional firearm injuries       | Male   | Education (years per capita)                        |          |   | X        | X |
| Unintentional firearm injuries       | Male   | LDI (IS per capita)                                 |          | X |          | X |
| Unintentional firearm injuries       | Male   | Population Density (over 1000 ppl/sqkm, proportion) |          | X |          | X |
| Unintentional firearm injuries       | Male   | Population Density (under 150 ppl/sqkm, proportion) |          | X |          | X |
| Unintentional firearm injuries       | Male   | Sociodemographic Status                             |          |   |          | X |
| Unintentional firearm injuries       | Female | Log-transformed SEV scalar: Mech Gun                |          |   | X        |   |
| Unintentional firearm injuries       | Female | Alcohol (litres per capita)                         |          | X |          | X |
| Unintentional firearm injuries       | Female | Health System Access (unitless)                     |          | X |          | X |
| Unintentional firearm injuries       | Female | Education (years per capita)                        |          |   | X        | X |
| Unintentional firearm injuries       | Female | LDI (IS per capita)                                 |          | X |          | X |
| Unintentional firearm injuries       | Female | Population Density (over 1000 ppl/sqkm, proportion) |          | X |          | X |
| Unintentional firearm injuries       | Female | Population Density (under 150 ppl/sqkm, proportion) |          | X |          | X |
| Unintentional firearm injuries       | Female | Sociodemographic Status                             |          |   |          | X |
| Unintentional suffocation            | Male   | Log-transformed SEV scalar: Mech Suff               |          |   | X        |   |
| Unintentional suffocation            | Male   | Alcohol (litres per capita)                         |          | X |          | X |
| Unintentional suffocation            | Male   | Health System Access 2 (unitless)                   |          | X |          | X |
| Unintentional suffocation            | Male   | Population Density (over 1000 ppl/sqkm, proportion) |          | X |          | X |
| Unintentional suffocation            | Male   | Population Density (under 150 ppl/sqkm, proportion) |          | X |          | X |
| Unintentional suffocation            | Male   | Education (years per capita)                        |          |   | X        | X |
| Unintentional suffocation            | Male   | LDI (IS per capita)                                 |          | X |          | X |
| Unintentional suffocation            | Male   | Sociodemographic Status                             |          |   |          | X |
| Unintentional suffocation            | Female | Log-transformed SEV scalar: Mech Suff               |          |   | X        |   |
| Unintentional suffocation            | Female | Alcohol (litres per capita)                         |          | X |          | X |
| Unintentional suffocation            | Female | Health System Access 2 (unitless)                   |          | X |          | X |
| Unintentional suffocation            | Female | Population Density (over 1000 ppl/sqkm, proportion) |          | X |          | X |
| Unintentional suffocation            | Female | Population Density (under 150 ppl/sqkm, proportion) |          | X |          | X |
| Unintentional suffocation            | Female | Education (years per capita)                        |          |   | X        | X |
| Unintentional suffocation            | Female | LDI (IS per capita)                                 |          | X |          | X |
| Unintentional suffocation            | Female | Sociodemographic Status                             |          |   |          | X |
| Other exposure to mechanical forces  | Male   | Log-transformed SEV scalar: Oth Mech                |          |   | X        |   |
| Other exposure to mechanical forces  | Male   | Alcohol (litres per capita)                         |          | X |          | X |
| Other exposure to mechanical forces  | Male   | Health System Access (unitless)                     |          | X |          | X |
| Other exposure to mechanical forces  | Male   | Population Density (over 1000 ppl/sqkm, proportion) |          | X |          | X |
| Other exposure to mechanical forces  | Male   | Population Density (under 150 ppl/sqkm, proportion) |          | X |          | X |
| Other exposure to mechanical forces  | Male   | Education (years per capita)                        |          |   | X        | X |
| Other exposure to mechanical forces  | Male   | LDI (IS per capita)                                 |          | X |          | X |
| Other exposure to mechanical forces  | Male   | Sociodemographic Status                             |          |   |          | X |
| Other exposure to mechanical forces  | Female | Log-transformed SEV scalar: Oth Mech                |          |   | X        |   |
| Other exposure to mechanical forces  | Female | Alcohol (litres per capita)                         |          | X |          | X |
| Other exposure to mechanical forces  | Female | Health System Access (unitless)                     |          | X |          | X |
| Other exposure to mechanical forces  | Female | Population Density (over 1000 ppl/sqkm, proportion) |          | X |          | X |
| Other exposure to mechanical forces  | Female | Population Density (under 150 ppl/sqkm, proportion) |          | X |          | X |
| Other exposure to mechanical forces  | Female | Education (years per capita)                        |          |   | X        | X |
| Other exposure to mechanical forces  | Female | LDI (IS per capita)                                 |          | X |          | X |
| Other exposure to mechanical forces  | Female | Sociodemographic Status                             |          |   |          | X |
| Adverse effects of medical treatment | Male   | Health System Access 2 (unitless)                   |          | X |          | X |
| Adverse effects of medical treatment | Male   | LDI (IS per capita)                                 |          | X |          | X |
| Adverse effects of medical treatment | Male   | Sociodemographic Status                             |          |   |          | X |
| Adverse effects of medical treatment | Female | Health System Access 2 (unitless)                   |          | X |          | X |
| Adverse effects of medical treatment | Female | LDI (IS per capita)                                 |          | X |          | X |
| Adverse effects of medical treatment | Female | Sociodemographic Status                             |          |   |          | X |
| Animal contact                       | Male   | Alcohol (litres per capita)                         |          | X |          | X |
| Animal contact                       | Male   | Log-transformed SEV scalar: Animal                  |          |   | X        |   |
| Animal contact                       | Male   | Vehicles - 2 wheels (per capita)                    |          | X |          | X |
| Animal contact                       | Male   | Vehicles - 4 wheels (per capita)                    |          | X |          | X |
| Animal contact                       | Male   | Health System Access 2 (unitless)                   |          | X |          | X |
| Animal contact                       | Male   | Population 15 to 30 (proportion)                    |          | X |          | X |
| Animal contact                       | Male   | Education (years per capita)                        |          |   | X        | X |
| Animal contact                       | Male   | Elevation Over 1500m (proportion)                   |          | X |          | X |
| Animal contact                       | Male   | Elevation Under 100m (proportion)                   |          | X |          | X |
| Animal contact                       | Male   | LDI (IS per capita)                                 |          | X |          | X |
| Animal contact                       | Male   | Population Density (over 1000 ppl/sqkm, proportion) |          | X |          | X |
| Animal contact                       | Male   | Population Density (under 150 ppl/sqkm, proportion) |          | X |          | X |
| Animal contact                       | Male   | Sociodemographic Status                             |          |   |          | X |
| Animal contact                       | Female | Alcohol (litres per capita)                         |          | X |          | X |
| Animal contact                       | Female | Log-transformed SEV scalar: Animal                  |          |   | X        |   |
| Animal contact                       | Female | Vehicles - 2 wheels (per capita)                    |          | X |          | X |
| Animal contact                       | Female | Vehicles - 4 wheels (per capita)                    |          | X |          | X |
| Animal contact                       | Female | Health System Access 2 (unitless)                   |          | X |          | X |
| Animal contact                       | Female | Population 15 to 30 (proportion)                    |          | X |          | X |
| Animal contact                       | Female | Education (years per capita)                        |          |   | X        | X |
| Animal contact                       | Female | Elevation Over 1500m (proportion)                   |          | X |          | X |
| Animal contact                       | Female | Elevation Under 100m (proportion)                   |          | X |          | X |
| Animal contact                       | Female | LDI (IS per capita)                                 |          | X |          | X |
| Animal contact                       | Female | Population Density (over 1000 ppl/sqkm, proportion) |          | X |          | X |
| Animal contact                       | Female | Population Density (under 150 ppl/sqkm, proportion) |          | X |          | X |
| Animal contact                       | Female | Sociodemographic Status                             |          |   |          | X |
| Venomous animal contact              | Male   | Alcohol (litres per capita)                         |          | X |          | X |

Appendix Table 12: Comparison of GBD 2013 and GBD 2015 covariates and level of covariates in cause of death modeling

|                                                 |        |                                                                | GBD 2013 |   | GBD 2015 |   |
|-------------------------------------------------|--------|----------------------------------------------------------------|----------|---|----------|---|
|                                                 |        |                                                                |          |   |          |   |
| Venomous animal contact                         | Male   | Log-transformed SEV scalar: Venom                              |          |   | X        |   |
| Venomous animal contact                         | Male   | Vehicles - 2 wheels (per capita)                               | X        |   | X        |   |
| Venomous animal contact                         | Male   | Vehicles - 4 wheels (per capita)                               | X        |   | X        |   |
| Venomous animal contact                         | Male   | Health System Access 2 (unitless)                              |          | X |          | X |
| Venomous animal contact                         | Male   | Education (years per capita)                                   |          | X |          | X |
| Venomous animal contact                         | Male   | Elevation Over 1500m (proportion)                              |          | X |          | X |
| Venomous animal contact                         | Male   | Elevation Under 100m (proportion)                              |          | X |          | X |
| Venomous animal contact                         | Male   | LDI (IS per capita)                                            |          | X |          | X |
| Venomous animal contact                         | Male   | Population Density (over 1000 ppl/sqkm, proportion)            |          | X |          | X |
| Venomous animal contact                         | Male   | Population Density (under 150 ppl/sqkm, proportion)            |          | X |          | X |
| Venomous animal contact                         | Male   | Sociodemographic Status                                        |          |   |          | X |
| Venomous animal contact                         | Female | Alcohol (litres per capita)                                    | X        |   | X        |   |
| Venomous animal contact                         | Female | Log-transformed SEV scalar: Venom                              |          |   | X        |   |
| Venomous animal contact                         | Female | Vehicles - 2 wheels (per capita)                               | X        |   | X        |   |
| Venomous animal contact                         | Female | Vehicles - 4 wheels (per capita)                               | X        |   | X        |   |
| Venomous animal contact                         | Female | Health System Access 2 (unitless)                              |          | X |          | X |
| Venomous animal contact                         | Female | Education (years per capita)                                   |          | X |          | X |
| Venomous animal contact                         | Female | Elevation Over 1500m (proportion)                              |          | X |          | X |
| Venomous animal contact                         | Female | Elevation Under 100m (proportion)                              |          | X |          | X |
| Venomous animal contact                         | Female | LDI (IS per capita)                                            |          | X |          | X |
| Venomous animal contact                         | Female | Population Density (over 1000 ppl/sqkm, proportion)            |          | X |          | X |
| Venomous animal contact                         | Female | Population Density (under 150 ppl/sqkm, proportion)            |          | X |          | X |
| Venomous animal contact                         | Female | Sociodemographic Status                                        |          |   |          | X |
| Non-venomous animal contact                     | Male   | Alcohol (litres per capita)                                    | X        |   | X        |   |
| Non-venomous animal contact                     | Male   | Log-transformed SEV scalar: Non Ven                            |          |   | X        |   |
| Non-venomous animal contact                     | Male   | Vehicles - 2 wheels (per capita)                               | X        |   | X        |   |
| Non-venomous animal contact                     | Male   | Vehicles - 4 wheels (per capita)                               | X        |   | X        |   |
| Non-venomous animal contact                     | Male   | Health System Access 2 (unitless)                              |          | X |          | X |
| Non-venomous animal contact                     | Male   | Education (years per capita)                                   |          | X |          | X |
| Non-venomous animal contact                     | Male   | Elevation Over 1500m (proportion)                              |          | X |          | X |
| Non-venomous animal contact                     | Male   | Elevation Under 100m (proportion)                              |          | X |          | X |
| Non-venomous animal contact                     | Male   | LDI (IS per capita)                                            |          | X |          | X |
| Non-venomous animal contact                     | Male   | Population Density (over 1000 ppl/sqkm, proportion)            |          | X |          | X |
| Non-venomous animal contact                     | Male   | Population Density (under 150 ppl/sqkm, proportion)            |          | X |          | X |
| Non-venomous animal contact                     | Male   | Sociodemographic Status                                        |          |   |          | X |
| Non-venomous animal contact                     | Female | Alcohol (litres per capita)                                    | X        |   | X        |   |
| Non-venomous animal contact                     | Female | Log-transformed SEV scalar: Non Ven                            |          |   | X        |   |
| Non-venomous animal contact                     | Female | Vehicles - 2 wheels (per capita)                               | X        |   | X        |   |
| Non-venomous animal contact                     | Female | Vehicles - 4 wheels (per capita)                               | X        |   | X        |   |
| Non-venomous animal contact                     | Female | Health System Access 2 (unitless)                              |          | X |          | X |
| Non-venomous animal contact                     | Female | Education (years per capita)                                   |          | X |          | X |
| Non-venomous animal contact                     | Female | Elevation Over 1500m (proportion)                              |          | X |          | X |
| Non-venomous animal contact                     | Female | Elevation Under 100m (proportion)                              |          | X |          | X |
| Non-venomous animal contact                     | Female | LDI (IS per capita)                                            |          | X |          | X |
| Non-venomous animal contact                     | Female | Population Density (over 1000 ppl/sqkm, proportion)            |          | X |          | X |
| Non-venomous animal contact                     | Female | Population Density (under 150 ppl/sqkm, proportion)            |          | X |          | X |
| Non-venomous animal contact                     | Female | Sociodemographic Status                                        |          |   |          | X |
| Pulmonary aspiration and foreign body in airway | Male   | Log-transformed SEV scalar: F Body Asp                         |          |   | X        |   |
| Pulmonary aspiration and foreign body in airway | Male   | Alcohol (litres per capita)                                    | X        |   | X        |   |
| Pulmonary aspiration and foreign body in airway | Male   | Health System Access 2 (unitless)                              |          |   | X        |   |
| Pulmonary aspiration and foreign body in airway | Male   | Mean BMI                                                       | X        |   | X        |   |
| Pulmonary aspiration and foreign body in airway | Male   | LDI (IS per capita)                                            |          | X |          | X |
| Pulmonary aspiration and foreign body in airway | Male   | Sociodemographic Status                                        |          |   |          | X |
| Pulmonary aspiration and foreign body in airway | Male   | Health System Access (capped)                                  | X        |   |          |   |
| Pulmonary aspiration and foreign body in airway | Female | Log-transformed SEV scalar: F Body Asp                         |          |   | X        |   |
| Pulmonary aspiration and foreign body in airway | Female | Alcohol (litres per capita)                                    | X        |   | X        |   |
| Pulmonary aspiration and foreign body in airway | Female | Health System Access 2 (unitless)                              |          |   | X        |   |
| Pulmonary aspiration and foreign body in airway | Female | Mean BMI                                                       | X        |   | X        |   |
| Pulmonary aspiration and foreign body in airway | Female | LDI (IS per capita)                                            |          | X |          | X |
| Pulmonary aspiration and foreign body in airway | Female | Sociodemographic Status                                        |          |   |          | X |
| Pulmonary aspiration and foreign body in airway | Female | Health System Access (capped)                                  | X        |   |          |   |
| Foreign body in other body part                 | Male   | Alcohol (litres per capita)                                    | X        |   | X        |   |
| Foreign body in other body part                 | Male   | Log-transformed SEV scalar: Oth F Body                         |          |   | X        |   |
| Foreign body in other body part                 | Male   | Health System Access 2 (unitless)                              |          | X |          | X |
| Foreign body in other body part                 | Male   | Education (years per capita)                                   |          | X |          | X |
| Foreign body in other body part                 | Male   | Elevation Over 1500m (proportion)                              |          | X |          | X |
| Foreign body in other body part                 | Male   | Elevation Under 100m (proportion)                              |          | X |          | X |
| Foreign body in other body part                 | Male   | LDI (IS per capita)                                            |          | X |          | X |
| Foreign body in other body part                 | Male   | Population Density (over 1000 ppl/sqkm, proportion)            |          | X |          | X |
| Foreign body in other body part                 | Male   | Population Density (under 150 ppl/sqkm, proportion)            |          | X |          | X |
| Foreign body in other body part                 | Male   | Sociodemographic Status                                        |          |   |          | X |
| Foreign body in other body part                 | Female | Alcohol (litres per capita)                                    | X        |   | X        |   |
| Foreign body in other body part                 | Female | Log-transformed SEV scalar: Oth F Body                         |          |   | X        |   |
| Foreign body in other body part                 | Female | Health System Access 2 (unitless)                              |          | X |          | X |
| Foreign body in other body part                 | Female | Education (years per capita)                                   |          | X |          | X |
| Foreign body in other body part                 | Female | Elevation Over 1500m (proportion)                              |          | X |          | X |
| Foreign body in other body part                 | Female | Elevation Under 100m (proportion)                              |          | X |          | X |
| Foreign body in other body part                 | Female | LDI (IS per capita)                                            |          | X |          | X |
| Foreign body in other body part                 | Female | Population Density (over 1000 ppl/sqkm, proportion)            |          | X |          | X |
| Foreign body in other body part                 | Female | Population Density (under 150 ppl/sqkm, proportion)            |          | X |          | X |
| Foreign body in other body part                 | Female | Sociodemographic Status                                        |          |   |          | X |
| Environmental heat and cold exposure            | Male   | Health System Access 2 (unitless)                              |          |   |          | X |
| Environmental heat and cold exposure            | Male   | 90th percentile climatic temperature in the given country-year |          |   |          | X |
| Environmental heat and cold exposure            | Male   | Education (years per capita)                                   |          |   |          | X |
| Environmental heat and cold exposure            | Male   | Elevation 500 to 1500m (proportion)                            |          |   |          | X |

Appendix Table 12: Comparison of GBD 2013 and GBD 2015 covariates and level of covariates in cause of death modeling

|                                      |        |                                                                 | GBD 2013 |   | GBD 2015 |   |
|--------------------------------------|--------|-----------------------------------------------------------------|----------|---|----------|---|
|                                      |        |                                                                 |          |   |          |   |
| Environmental heat and cold exposure | Male   | Elevation Over 1500m (proportion)                               |          |   |          | X |
| Environmental heat and cold exposure | Male   | LDI (IS per capita)                                             |          |   |          | X |
| Environmental heat and cold exposure | Male   | Population Density (150-300 ppl/sqkm, proportion)               |          |   |          | X |
| Environmental heat and cold exposure | Male   | Population-weighted mean temperature                            |          |   |          | X |
| Environmental heat and cold exposure | Male   | Rainfall (Quintiles 4-5)                                        |          |   |          | X |
| Environmental heat and cold exposure | Male   | Sanitation (proportion with access)                             |          |   |          | X |
| Environmental heat and cold exposure | Male   | Sociodemographic Status                                         |          |   |          | X |
| Environmental heat and cold exposure | Female | Health System Access 2 (unitless)                               |          |   | X        |   |
| Environmental heat and cold exposure | Female | 90th percentile climatic temperature in the given country-year  |          |   |          | X |
| Environmental heat and cold exposure | Female | Education (years per capita)                                    |          |   |          | X |
| Environmental heat and cold exposure | Female | Elevation 500 to 1500m (proportion)                             |          |   |          | X |
| Environmental heat and cold exposure | Female | Elevation Over 1500m (proportion)                               |          |   |          | X |
| Environmental heat and cold exposure | Female | LDI (IS per capita)                                             |          |   |          | X |
| Environmental heat and cold exposure | Female | Population Density (150-300 ppl/sqkm, proportion)               |          |   |          | X |
| Environmental heat and cold exposure | Female | Population-weighted mean temperature                            |          |   |          | X |
| Environmental heat and cold exposure | Female | Rainfall (Quintiles 4-5)                                        |          |   |          | X |
| Environmental heat and cold exposure | Female | Sanitation (proportion with access)                             |          |   |          | X |
| Environmental heat and cold exposure | Female | Sociodemographic Status                                         |          |   |          | X |
| Other unintentional injuries         | Male   | Alcohol (litres per capita)                                     | X        |   | X        |   |
| Other unintentional injuries         | Male   | Log-transformed SEV scalar: Oth Unint                           |          |   | X        |   |
| Other unintentional injuries         | Male   | Vehicles - 2 wheels (per capita)                                | X        |   | X        |   |
| Other unintentional injuries         | Male   | Vehicles - 4 wheels (per capita)                                | X        |   | X        |   |
| Other unintentional injuries         | Male   | Health System Access 2 (unitless)                               |          | X |          | X |
| Other unintentional injuries         | Male   | Education (years per capita)                                    |          | X |          | X |
| Other unintentional injuries         | Male   | Elevation Over 1500m (proportion)                               |          | X |          | X |
| Other unintentional injuries         | Male   | Elevation Under 100m (proportion)                               |          | X |          | X |
| Other unintentional injuries         | Male   | LDI (IS per capita)                                             |          | X |          | X |
| Other unintentional injuries         | Male   | Population Density (over 1000 ppl/sqkm, proportion)             |          | X |          | X |
| Other unintentional injuries         | Male   | Population Density (under 150 ppl/sqkm, proportion)             |          | X |          | X |
| Other unintentional injuries         | Male   | Sociodemographic Status                                         |          |   |          | X |
| Other unintentional injuries         | Female | Alcohol (litres per capita)                                     | X        |   | X        |   |
| Other unintentional injuries         | Female | Log-transformed SEV scalar: Oth Unint                           |          |   | X        |   |
| Other unintentional injuries         | Female | Vehicles - 2 wheels (per capita)                                | X        |   | X        |   |
| Other unintentional injuries         | Female | Vehicles - 4 wheels (per capita)                                | X        |   | X        |   |
| Other unintentional injuries         | Female | Health System Access 2 (unitless)                               |          | X |          | X |
| Other unintentional injuries         | Female | Education (years per capita)                                    |          | X |          | X |
| Other unintentional injuries         | Female | Elevation Over 1500m (proportion)                               |          | X |          | X |
| Other unintentional injuries         | Female | Elevation Under 100m (proportion)                               |          | X |          | X |
| Other unintentional injuries         | Female | LDI (IS per capita)                                             |          | X |          | X |
| Other unintentional injuries         | Female | Population Density (over 1000 ppl/sqkm, proportion)             |          | X |          | X |
| Other unintentional injuries         | Female | Population Density (under 150 ppl/sqkm, proportion)             |          | X |          | X |
| Other unintentional injuries         | Female | Sociodemographic Status                                         |          |   |          | X |
| Self-harm                            | Male   | Alcohol (litres per capita)                                     | X        |   | X        |   |
| Self-harm                            | Male   | Log-transformed SEV scalar: Self Harm                           |          |   | X        |   |
| Self-harm                            | Male   | Major disorder from dismod interpolated to be used as covariate |          |   | X        |   |
| Self-harm                            | Male   | Opium Cultivation (binary)                                      |          | X |          | X |
| Self-harm                            | Male   | Population Density (150-300 ppl/sqkm, proportion)               |          | X |          | X |
| Self-harm                            | Male   | Population Density (300-500 ppl/sqkm, proportion)               |          | X |          | X |
| Self-harm                            | Male   | Population Density (500-1000 ppl/sqkm, proportion)              |          | X |          | X |
| Self-harm                            | Male   | Population Density (over 1000 ppl/sqkm, proportion)             |          | X |          | X |
| Self-harm                            | Male   | Population Density (under 150 ppl/sqkm, proportion)             |          | X |          | X |
| Self-harm                            | Male   | Religion (binary, >50% Muslim)                                  |          | X |          | X |
| Self-harm                            | Male   | Education (years per capita)                                    |          | X |          | X |
| Self-harm                            | Male   | LDI (IS per capita)                                             |          | X |          | X |
| Self-harm                            | Male   | Sociodemographic Status                                         |          |   |          | X |
| Self-harm                            | Female | Alcohol (litres per capita)                                     | X        |   | X        |   |
| Self-harm                            | Female | Log-transformed SEV scalar: Self Harm                           |          |   | X        |   |
| Self-harm                            | Female | Major disorder from dismod interpolated to be used as covariate |          |   | X        |   |
| Self-harm                            | Female | Opium Cultivation (binary)                                      |          | X |          | X |
| Self-harm                            | Female | Population Density (150-300 ppl/sqkm, proportion)               |          | X |          | X |
| Self-harm                            | Female | Population Density (300-500 ppl/sqkm, proportion)               |          | X |          | X |
| Self-harm                            | Female | Population Density (500-1000 ppl/sqkm, proportion)              |          | X |          | X |
| Self-harm                            | Female | Population Density (over 1000 ppl/sqkm, proportion)             |          | X |          | X |
| Self-harm                            | Female | Population Density (under 150 ppl/sqkm, proportion)             |          | X |          | X |
| Self-harm                            | Female | Religion (binary, >50% Muslim)                                  |          | X |          | X |
| Self-harm                            | Female | Education (years per capita)                                    |          | X |          | X |
| Self-harm                            | Female | LDI (IS per capita)                                             |          | X |          | X |
| Self-harm                            | Female | Sociodemographic Status                                         |          |   |          | X |
| Interpersonal violence               | Male   | Alcohol (litres per capita)                                     | X        |   | X        |   |
| Interpersonal violence               | Male   | Health System Access 2 (unitless)                               | X        |   | X        |   |
| Interpersonal violence               | Male   | Log-transformed SEV scalar: Violence                            |          |   | X        |   |
| Interpersonal violence               | Male   | Opium Cultivation (binary)                                      |          | X |          | X |
| Interpersonal violence               | Male   | Population Density (over 1000 ppl/sqkm, proportion)             |          | X |          | X |
| Interpersonal violence               | Male   | Education (years per capita)                                    |          | X |          | X |
| Interpersonal violence               | Male   | LDI (IS per capita)                                             |          | X |          | X |
| Interpersonal violence               | Male   | Sociodemographic Status                                         |          |   |          | X |
| Interpersonal violence               | Female | Alcohol (litres per capita)                                     | X        |   | X        |   |
| Interpersonal violence               | Female | Health System Access 2 (unitless)                               | X        |   | X        |   |
| Interpersonal violence               | Female | Log-transformed SEV scalar: Violence                            |          |   | X        |   |
| Interpersonal violence               | Female | Opium Cultivation (binary)                                      |          | X |          | X |
| Interpersonal violence               | Female | Population Density (over 1000 ppl/sqkm, proportion)             |          | X |          | X |
| Interpersonal violence               | Female | Education (years per capita)                                    |          | X |          | X |
| Interpersonal violence               | Female | LDI (IS per capita)                                             |          | X |          | X |
| Interpersonal violence               | Female | Sociodemographic Status                                         |          |   |          | X |
| Assault by firearm                   | Male   | Alcohol (litres per capita)                                     | X        |   | X        |   |

Appendix Table 12: Comparison of GBD 2013 and GBD 2015 covariates and level of covariates in cause of death modeling

|                         |        |                                                     | GBD 2013 |   |   | GBD 2015 |   |   |
|-------------------------|--------|-----------------------------------------------------|----------|---|---|----------|---|---|
|                         |        |                                                     |          |   |   |          |   |   |
| Assault by firearm      | Male   | Health System Access 2 (unitless)                   | X        |   |   | X        |   |   |
| Assault by firearm      | Male   | Log-transformed SEV scalar: Viol Gun                |          |   |   | X        |   |   |
| Assault by firearm      | Male   | Opium Cultivation (binary)                          |          | X |   |          | X |   |
| Assault by firearm      | Male   | Population Density (over 1000 ppl/sqkm, proportion) |          | X |   |          | X |   |
| Assault by firearm      | Male   | Education (years per capita)                        |          |   | X |          |   | X |
| Assault by firearm      | Male   | LDI (IS per capita)                                 |          |   | X |          |   | X |
| Assault by firearm      | Male   | Sociodemographic Status                             |          |   |   |          |   | X |
| Assault by firearm      | Female | Alcohol (litres per capita)                         | X        |   |   | X        |   |   |
| Assault by firearm      | Female | Health System Access 2 (unitless)                   | X        |   |   | X        |   |   |
| Assault by firearm      | Female | Log-transformed SEV scalar: Viol Gun                |          |   |   | X        |   |   |
| Assault by firearm      | Female | Opium Cultivation (binary)                          |          | X |   |          | X |   |
| Assault by firearm      | Female | Population Density (over 1000 ppl/sqkm, proportion) |          | X |   |          | X |   |
| Assault by firearm      | Female | Education (years per capita)                        |          |   | X |          |   | X |
| Assault by firearm      | Female | LDI (IS per capita)                                 |          |   | X |          |   | X |
| Assault by firearm      | Female | Sociodemographic Status                             |          |   |   |          |   | X |
| Assault by sharp object | Male   | Alcohol (litres per capita)                         | X        |   |   | X        |   |   |
| Assault by sharp object | Male   | Health System Access 2 (unitless)                   | X        |   |   | X        |   |   |
| Assault by sharp object | Male   | Log-transformed SEV scalar: Viol Knife              |          |   |   | X        |   |   |
| Assault by sharp object | Male   | Opium Cultivation (binary)                          |          | X |   |          | X |   |
| Assault by sharp object | Male   | Population Density (over 1000 ppl/sqkm, proportion) |          | X |   |          | X |   |
| Assault by sharp object | Male   | Education (years per capita)                        |          |   | X |          |   | X |
| Assault by sharp object | Male   | LDI (IS per capita)                                 |          |   | X |          |   | X |
| Assault by sharp object | Male   | Sociodemographic Status                             |          |   |   |          |   | X |
| Assault by sharp object | Female | Alcohol (litres per capita)                         | X        |   |   | X        |   |   |
| Assault by sharp object | Female | Health System Access 2 (unitless)                   | X        |   |   | X        |   |   |
| Assault by sharp object | Female | Log-transformed SEV scalar: Viol Knife              |          |   |   | X        |   |   |
| Assault by sharp object | Female | Opium Cultivation (binary)                          |          | X |   |          | X |   |
| Assault by sharp object | Female | Population Density (over 1000 ppl/sqkm, proportion) |          | X |   |          | X |   |
| Assault by sharp object | Female | Education (years per capita)                        |          |   | X |          |   | X |
| Assault by sharp object | Female | LDI (IS per capita)                                 |          |   | X |          |   | X |
| Assault by sharp object | Female | Sociodemographic Status                             |          |   |   |          |   | X |
| Assault by other means  | Male   | Alcohol (litres per capita)                         | X        |   |   | X        |   |   |
| Assault by other means  | Male   | Health System Access 2 (unitless)                   | X        |   |   | X        |   |   |
| Assault by other means  | Male   | Log-transformed SEV scalar: Oth Viol                |          |   |   | X        |   |   |
| Assault by other means  | Male   | Opium Cultivation (binary)                          |          | X |   |          | X |   |
| Assault by other means  | Male   | Population Density (over 1000 ppl/sqkm, proportion) |          | X |   |          | X |   |
| Assault by other means  | Male   | Education (years per capita)                        |          |   | X |          |   | X |
| Assault by other means  | Male   | LDI (IS per capita)                                 |          |   | X |          |   | X |
| Assault by other means  | Male   | Sociodemographic Status                             |          |   |   |          |   | X |
| Assault by other means  | Female | Alcohol (litres per capita)                         | X        |   |   | X        |   |   |
| Assault by other means  | Female | Health System Access 2 (unitless)                   | X        |   |   | X        |   |   |
| Assault by other means  | Female | Log-transformed SEV scalar: Oth Viol                |          |   |   | X        |   |   |
| Assault by other means  | Female | Opium Cultivation (binary)                          |          | X |   |          | X |   |
| Assault by other means  | Female | Population Density (over 1000 ppl/sqkm, proportion) |          | X |   |          | X |   |
| Assault by other means  | Female | Education (years per capita)                        |          |   | X |          |   | X |
| Assault by other means  | Female | LDI (IS per capita)                                 |          |   | X |          |   | X |
| Assault by other means  | Female | Sociodemographic Status                             |          |   |   |          |   | X |

**Appendix Table 13: Modelling strategy for individual cause of death models in GBD 2015**

| Cause                                                             | Level     | Model type                                                                                                                            |
|-------------------------------------------------------------------|-----------|---------------------------------------------------------------------------------------------------------------------------------------|
| Communicable, maternal, neonatal, and nutritional diseases        | Aggregate |                                                                                                                                       |
| HIV/AIDS and tuberculosis                                         | Aggregate |                                                                                                                                       |
| Tuberculosis                                                      | 1         | CODEm                                                                                                                                 |
| HIV/AIDS                                                          | 1         | Spectrum                                                                                                                              |
| HIV/AIDS resulting in mycobacterial infection                     | 2         | Spectrum                                                                                                                              |
| HIV/AIDS resulting in other diseases                              | 2         | Spectrum                                                                                                                              |
| Diarrhea, lower respiratory, and other common infectious diseases | Aggregate |                                                                                                                                       |
| Diarrheal diseases                                                | 1         | CODEm                                                                                                                                 |
| Intestinal infectious diseases                                    | Aggregate |                                                                                                                                       |
| Typhoid fever                                                     | 1         | Natural history model                                                                                                                 |
| Paratyphoid fever                                                 | 1         | Natural history model                                                                                                                 |
| Other intestinal infectious diseases                              | 1         | Negative binomial regression                                                                                                          |
| Lower respiratory infections                                      | 1         | CODEm                                                                                                                                 |
| Upper respiratory infections                                      | 1         | Negative binomial regression                                                                                                          |
| Otitis media                                                      | 1         | CODEm                                                                                                                                 |
| Meningitis                                                        | 1         | CODEm                                                                                                                                 |
| Pneumococcal meningitis                                           | 2         | DisMod MR-2.1 proportion (location/year/age/sex-specific)                                                                             |
| H influenzae type B meningitis                                    | 2         | DisMod MR-2.1 proportion (location/year/age/sex-specific)                                                                             |
| Meningococcal meningitis                                          | 2         | DisMod MR-2.1 proportion (location/year/age/sex-specific)                                                                             |
| Other meningitis                                                  | 2         | DisMod MR-2.1 proportion (location/year/age/sex-specific)                                                                             |
| Encephalitis                                                      | 1         | CODEm                                                                                                                                 |
| Diphtheria                                                        | 1         | Negative binomial regression                                                                                                          |
| Whooping cough                                                    | 1         | CODEm (VR countries); natural history model (non-VR countries)                                                                        |
| Tetanus                                                           | 1         | CODEm                                                                                                                                 |
| Measles                                                           | 1         | Natural history model                                                                                                                 |
| Varicella and herpes zoster                                       | 1         | Negative binomial regression                                                                                                          |
| Neglected tropical diseases and malaria                           | Aggregate |                                                                                                                                       |
| Malaria                                                           | 1         | CODEm (P. falciparum outside of Africa); natural history model (P. falciparum within Africa); negative binomial regression (P. vivax) |
| Chagas disease                                                    | 1         | CODEm                                                                                                                                 |
| Leishmaniasis                                                     | Aggregate |                                                                                                                                       |
| Visceral leishmaniasis                                            | 1         | Natural history model                                                                                                                 |
| African trypanosomiasis                                           | 1         | Natural history model                                                                                                                 |
| Schistosomiasis                                                   | 1         | Negative binomial regression                                                                                                          |
| Cysticercosis                                                     | 1         | Negative binomial regression                                                                                                          |
| Cystic echinococcosis                                             | 1         | Negative binomial regression                                                                                                          |
| Dengue                                                            | 1         | CODEm                                                                                                                                 |
| Yellow fever                                                      | 1         | Natural history model                                                                                                                 |
| Rabies                                                            | 1         | CODEm                                                                                                                                 |
| Intestinal nematode infections                                    | Aggregate |                                                                                                                                       |
| Ascariasis                                                        | 1         | Negative binomial regression                                                                                                          |
| Ebola                                                             | 1         | Shock                                                                                                                                 |
| Other neglected tropical diseases                                 | 1         | CODEm                                                                                                                                 |
| Maternal disorders                                                | 1         | CODEm                                                                                                                                 |
| Maternal hemorrhage                                               | 2         | DisMod MR-2.1 proportion (location/year/age/sex-specific)                                                                             |
| Maternal sepsis and other maternal infections                     | 2         | DisMod MR-2.1 proportion (location/year/age/sex-specific)                                                                             |
| Maternal hypertensive disorders                                   | 2         | DisMod MR-2.1 proportion (location/year/age/sex-specific)                                                                             |
| Maternal obstructed labor and uterine rupture                     | 2         | DisMod MR-2.1 proportion (location/year/age/sex-specific)                                                                             |
| Maternal abortion, miscarriage, and ectopic pregnancy             | 2         | DisMod MR-2.1 proportion (location/year/age/sex-specific)                                                                             |
| Indirect maternal deaths                                          | 2         | DisMod MR-2.1 proportion (location/year/age/sex-specific)                                                                             |
| Late maternal deaths                                              | 2         | DisMod MR-2.1 proportion (location/year/age/sex-specific)                                                                             |
| Maternal deaths aggravated by HIV/AIDS                            | 2         | Spectrum, DisMod MR-2.1 proportion (location/year/age/sex-specific)                                                                   |
| Other maternal disorders                                          | 2         | DisMod MR-2.1 proportion (location/year/age/sex-specific)                                                                             |
| Neonatal disorders                                                | 1         | CODEm                                                                                                                                 |
| Neonatal preterm birth complications                              | 2         | CODEm                                                                                                                                 |
| Neonatal encephalopathy due to birth asphyxia and trauma          | 2         | CODEm                                                                                                                                 |
| Neonatal sepsis and other neonatal infections                     | 2         | CODEm                                                                                                                                 |
| Hemolytic disease and other neonatal jaundice                     | 2         | CODEm                                                                                                                                 |
| Other neonatal disorders                                          | 2         | CODEm                                                                                                                                 |
| Nutritional deficiencies                                          | 1         | CODEm                                                                                                                                 |
| Protein-energy malnutrition                                       | 2         | CODEm; mortality shock regression for famine (appended post-CodCorrect)                                                               |
| Iodine deficiency                                                 | 2         | Negative binomial regression                                                                                                          |
| Iron-deficiency anemia                                            | 2         | CODEm                                                                                                                                 |
| Other nutritional deficiencies                                    | 2         | CODEm                                                                                                                                 |
| Other communicable, maternal, neonatal, and nutritional diseases  | Aggregate |                                                                                                                                       |
| Sexually transmitted diseases excluding HIV                       | 1         | CODEm; natural history model (congenital syphilis)                                                                                    |

**Appendix Table 13: Modelling strategy for individual cause of death models in GBD 2015**

| Cause                                            | Level     | Model type                                                                         |
|--------------------------------------------------|-----------|------------------------------------------------------------------------------------|
| Syphilis                                         | 2         | Data proportion (age/sex-specific VR); natural history model (congenital syphilis) |
| Chlamydial infection                             | 2         | Data proportion (age/sex-specific VR)                                              |
| Gonococcal infection                             | 2         | Data proportion (age/sex-specific VR)                                              |
| Other sexually transmitted diseases              | 2         | Data proportion (age/sex-specific VR)                                              |
| Hepatitis                                        | 1         | CODEm                                                                              |
| Acute hepatitis A                                | 2         | Natural history model                                                              |
| Acute hepatitis B                                | 2         | Natural history model                                                              |
| Acute hepatitis C                                | 2         | Natural history model                                                              |
| Acute hepatitis E                                | 2         | Natural history model                                                              |
| Other infectious diseases                        | 1         | CODEm                                                                              |
| Non-communicable diseases                        | Aggregate |                                                                                    |
| Neoplasms                                        | Aggregate |                                                                                    |
| Lip and oral cavity cancer                       | 1         | CODEm                                                                              |
| Nasopharynx cancer                               | 1         | CODEm                                                                              |
| Other pharynx cancer                             | 1         | CODEm                                                                              |
| Esophageal cancer                                | 1         | CODEm                                                                              |
| Stomach cancer                                   | 1         | CODEm                                                                              |
| Colon and rectum cancer                          | 1         | CODEm                                                                              |
| Liver cancer                                     | 1         | CODEm                                                                              |
| Liver cancer due to hepatitis B                  | 2         | DisMod MR-2.1 proportion (location/year/age/sex-specific)                          |
| Liver cancer due to hepatitis C                  | 2         | DisMod MR-2.1 proportion (location/year/age/sex-specific)                          |
| Liver cancer due to alcohol use                  | 2         | DisMod MR-2.1 proportion (location/year/age/sex-specific)                          |
| Liver cancer due to other causes                 | 2         | DisMod MR-2.1 proportion (location/year/age/sex-specific)                          |
| Gallbladder and biliary tract cancer             | 1         | CODEm                                                                              |
| Pancreatic cancer                                | 1         | CODEm                                                                              |
| Larynx cancer                                    | 1         | CODEm                                                                              |
| Tracheal, bronchus, and lung cancer              | 1         | CODEm                                                                              |
| Malignant skin melanoma                          | 1         | CODEm                                                                              |
| Non-melanoma skin cancer                         | Aggregate |                                                                                    |
| Non-melanoma skin cancer squamous-cell carcinoma | 1         | CODEm                                                                              |
| Breast cancer                                    | 1         | CODEm                                                                              |
| Cervical cancer                                  | 1         | CODEm                                                                              |
| Uterine cancer                                   | 1         | CODEm                                                                              |
| Ovarian cancer                                   | 1         | CODEm                                                                              |
| Prostate cancer                                  | 1         | CODEm                                                                              |
| Testicular cancer                                | 1         | CODEm                                                                              |
| Kidney cancer                                    | 1         | CODEm                                                                              |
| Bladder cancer                                   | 1         | CODEm                                                                              |
| Brain and nervous system cancer                  | 1         | CODEm                                                                              |
| Thyroid cancer                                   | 1         | CODEm                                                                              |
| Mesothelioma                                     | 1         | CODEm                                                                              |
| Hodgkin lymphoma                                 | 1         | CODEm                                                                              |
| Non-Hodgkin lymphoma                             | 1         | CODEm                                                                              |
| Multiple myeloma                                 | 1         | CODEm                                                                              |
| Leukemia                                         | 1         | CODEm                                                                              |
| Acute lymphoid leukemia                          | 2         | CODEm                                                                              |
| Chronic lymphoid leukemia                        | 2         | CODEm                                                                              |
| Acute myeloid leukemia                           | 2         | CODEm                                                                              |
| Chronic myeloid leukemia                         | 2         | CODEm                                                                              |
| Other neoplasms                                  | 1         | CODEm                                                                              |
| Cardiovascular diseases                          | 1         | CODEm                                                                              |
| Rheumatic heart disease                          | 2         | CODEm                                                                              |
| Ischemic heart disease                           | 2         | CODEm                                                                              |
| Cerebrovascular disease                          | 2         | CODEm                                                                              |
| Ischemic stroke                                  | 3         | CODEm                                                                              |
| Hemorrhagic stroke                               | 3         | CODEm                                                                              |
| Hypertensive heart disease                       | 2         | CODEm                                                                              |
| Cardiomyopathy and myocarditis                   | 2         | CODEm                                                                              |
| Atrial fibrillation and flutter                  | 2         | Natural history model                                                              |
| Aortic aneurysm                                  | 2         | CODEm                                                                              |
| Peripheral vascular disease                      | 2         | CODEm                                                                              |
| Endocarditis                                     | 2         | CODEm                                                                              |
| Other cardiovascular and circulatory diseases    | 2         | CODEm                                                                              |
| Chronic respiratory diseases                     | 1         | CODEm                                                                              |
| Chronic obstructive pulmonary disease            | 2         | CODEm                                                                              |

**Appendix Table 13: Modelling strategy for individual cause of death models in GBD 2015**

| Cause                                               | Level     | Model type                                                              |
|-----------------------------------------------------|-----------|-------------------------------------------------------------------------|
| Pneumoconiosis                                      | 2         | CODEm                                                                   |
| Silicosis                                           | 3         | CODEm                                                                   |
| Asbestosis                                          | 3         | CODEm                                                                   |
| Coal workers pneumoconiosis                         | 3         | CODEm                                                                   |
| Other pneumoconiosis                                | 3         | CODEm                                                                   |
| Asthma                                              | 2         | CODEm                                                                   |
| Interstitial lung disease and pulmonary sarcoidosis | 2         | CODEm                                                                   |
| Other chronic respiratory diseases                  | 2         | CODEm                                                                   |
| Cirrhosis                                           | 1         | CODEm                                                                   |
| Cirrhosis due to hepatitis B                        | 2         | DisMod MR-2.1 proportion (location/year/age/sex-specific)               |
| Cirrhosis due to hepatitis C                        | 2         | DisMod MR-2.1 proportion (location/year/age/sex-specific)               |
| Cirrhosis due to alcohol use                        | 2         | DisMod MR-2.1 proportion (location/year/age/sex-specific)               |
| Cirrhosis due to other causes                       | 2         | DisMod MR-2.1 proportion (location/year/age/sex-specific)               |
| Digestive diseases                                  | 1         | CODEm                                                                   |
| Peptic ulcer disease                                | 2         | CODEm                                                                   |
| Gastritis and duodenitis                            | 2         | CODEm                                                                   |
| Appendicitis                                        | 2         | CODEm                                                                   |
| Paralytic ileus and intestinal obstruction          | 2         | CODEm                                                                   |
| Inguinal, femoral, and abdominal hernia             | 2         | CODEm                                                                   |
| Inflammatory bowel disease                          | 2         | CODEm                                                                   |
| Vascular intestinal disorders                       | 2         | CODEm                                                                   |
| Gallbladder and biliary diseases                    | 2         | CODEm                                                                   |
| Pancreatitis                                        | 2         | CODEm                                                                   |
| Other digestive diseases                            | 2         | CODEm                                                                   |
| Neurological disorders                              | Aggregate |                                                                         |
| Alzheimer disease and other dementias               | 1         | Natural history model                                                   |
| Parkinson disease                                   | 1         | CODEm                                                                   |
| Epilepsy                                            | 1         | CODEm                                                                   |
| Multiple sclerosis                                  | 1         | CODEm                                                                   |
| Motor neuron disease                                | 1         | CODEm                                                                   |
| Other neurological disorders                        | 1         | CODEm                                                                   |
| Mental and substance use disorders                  | Aggregate |                                                                         |
| Schizophrenia                                       | 1         | CODEm                                                                   |
| Alcohol use disorders                               | 1         | CODEm                                                                   |
| Drug use disorders                                  | 1         | CODEm                                                                   |
| Opioid use disorders                                | 2         | CODEm                                                                   |
| Cocaine use disorders                               | 2         | CODEm                                                                   |
| Amphetamine use disorders                           | 2         | CODEm                                                                   |
| Other drug use disorders                            | 2         | CODEm                                                                   |
| Eating disorders                                    | Aggregate |                                                                         |
| Anorexia nervosa                                    | 1         | CODEm                                                                   |
| Bulimia nervosa                                     | 1         | CODEm                                                                   |
| Diabetes, urogenital, blood, and endocrine diseases | Aggregate |                                                                         |
| Diabetes mellitus                                   | 1         | CODEm                                                                   |
| Acute glomerulonephritis                            | 1         | CODEm                                                                   |
| Chronic kidney disease                              | 1         | CODEm                                                                   |
| Chronic kidney disease due to diabetes mellitus     | 2         | DisMod MR-2.1 proportion (location/year/age/sex-specific)               |
| Chronic kidney disease due to hypertension          | 2         | DisMod MR-2.1 proportion (location/year/age/sex-specific)               |
| Chronic kidney disease due to glomerulonephritis    | 2         | DisMod MR-2.1 proportion (location/year/age/sex-specific)               |
| Chronic kidney disease due to other causes          | 2         | DisMod MR-2.1 proportion (location/year/age/sex-specific)               |
| Urinary diseases and male infertility               | 1         | CODEm                                                                   |
| Interstitial nephritis and urinary tract infections | 2         | CODEm                                                                   |
| Urolithiasis                                        | 2         | CODEm                                                                   |
| Other urinary diseases                              | 2         | CODEm                                                                   |
| Gynecological diseases                              | 1         | CODEm                                                                   |
| Uterine fibroids                                    | 2         | CODEm                                                                   |
| Polycystic ovarian syndrome                         | 2         | CODEm                                                                   |
| Endometriosis                                       | 2         | CODEm                                                                   |
| Genital prolapse                                    | 2         | CODEm                                                                   |
| Other gynecological diseases                        | 2         | CODEm                                                                   |
| Hemoglobinopathies and hemolytic anemias            | 1         | CODEm                                                                   |
| Thalassemias                                        | 2         | DisMod MR-2.1 cause-specific mortality (location/year/age/sex-specific) |
| Sickle cell disorders                               | 2         | DisMod MR-2.1 cause-specific mortality (location/year/age/sex-specific) |
| G6PD deficiency                                     | 2         | DisMod MR-2.1 cause-specific mortality (location/year/age/sex-specific) |
| Other hemoglobinopathies and hemolytic anemias      | 2         | Data proportion (age-specific high-income VR)                           |

**Appendix Table 13: Modelling strategy for individual cause of death models in GBD 2015**

| Cause                                             | Level     | Model type                                                         |
|---------------------------------------------------|-----------|--------------------------------------------------------------------|
| Endocrine, metabolic, blood, and immune disorders | 1         | CODEm                                                              |
| Musculoskeletal disorders                         | 1         | CODEm                                                              |
| Rheumatoid arthritis                              | 2         | CODEm                                                              |
| Other musculoskeletal disorders                   | 2         | CODEm                                                              |
| Other non-communicable diseases                   | Aggregate |                                                                    |
| Congenital anomalies                              | 1         | CODEm                                                              |
| Neural tube defects                               | 2         | CODEm                                                              |
| Congenital heart anomalies                        | 2         | CODEm                                                              |
| Cleft lip and cleft palate                        | 2         | CODEm                                                              |
| Down syndrome                                     | 2         | CODEm                                                              |
| Other chromosomal abnormalities                   | 2         | CODEm                                                              |
| Other congenital anomalies                        | 2         | CODEm                                                              |
| Skin and subcutaneous diseases                    | 1         | CODEm                                                              |
| Cellulitis                                        | 2         | CODEm                                                              |
| Pyoderma                                          | 2         | CODEm                                                              |
| Decubitus ulcer                                   | 2         | CODEm                                                              |
| Other skin and subcutaneous diseases              | 2         | CODEm                                                              |
| Sudden infant death syndrome                      | 1         | CODEm                                                              |
| Injuries                                          | Aggregate |                                                                    |
| Transport injuries                                | 1         | CODEm                                                              |
| Road injuries                                     | 2         | CODEm                                                              |
| Pedestrian road injuries                          | 3         | CODEm                                                              |
| Cyclist road injuries                             | 3         | CODEm                                                              |
| Motorcyclist road injuries                        | 3         | CODEm                                                              |
| Motor vehicle road injuries                       | 3         | CODEm                                                              |
| Other road injuries                               | 3         | CODEm                                                              |
| Other transport injuries                          | 2         | CODEm                                                              |
| Unintentional injuries                            | Aggregate |                                                                    |
| Falls                                             | 1         | CODEm                                                              |
| Drowning                                          | 1         | CODEm                                                              |
| Fire, heat, and hot substances                    | 1         | CODEm                                                              |
| Poisonings                                        | 1         | CODEm                                                              |
| Exposure to mechanical forces                     | Aggregate |                                                                    |
| Unintentional firearm injuries                    | 1         | CODEm                                                              |
| Unintentional suffocation                         | 1         | CODEm                                                              |
| Other exposure to mechanical forces               | 1         | CODEm                                                              |
| Adverse effects of medical treatment              | 1         | CODEm                                                              |
| Animal contact                                    | 1         | CODEm                                                              |
| Venomous animal contact                           | 2         | CODEm                                                              |
| Non-venomous animal contact                       | 2         | CODEm                                                              |
| Foreign body                                      | Aggregate |                                                                    |
| Pulmonary aspiration and foreign body in airway   | 1         | CODEm                                                              |
| Foreign body in other body part                   | 1         | CODEm                                                              |
| Exposure to forces of nature, non-disaster        | 1         | CODEm                                                              |
| Other unintentional injuries                      | 1         | CODEm                                                              |
| Self-harm and interpersonal violence              | Aggregate |                                                                    |
| Self-harm                                         | 1         | CODEm                                                              |
| Interpersonal violence                            | 1         | CODEm                                                              |
| Assault by firearm                                | 2         | CODEm                                                              |
| Assault by sharp object                           | 2         | CODEm                                                              |
| Assault by other means                            | 2         | CODEm                                                              |
| Forces of nature, war, and legal intervention     | Aggregate |                                                                    |
| Exposure to forces of nature                      | 1         | Mortality shock regression for disaster (appended post-CodCorrect) |
| Collective violence and legal intervention        | 1         | Mortality shock regression for war (appended post-CodCorrect)      |



**Appendix Table 14: CoDCorrect cause hierarchy with levels**

| Cause name                                               | CoDCorrect level |
|----------------------------------------------------------|------------------|
| All causes                                               | 0                |
| Tuberculosis                                             | 1                |
| Diarrheal diseases                                       | 1                |
| Typhoid fever                                            | 1                |
| Paratyphoid fever                                        | 1                |
| Other intestinal infectious diseases                     | 1                |
| Lower respiratory infections                             | 1                |
| Upper respiratory infections                             | 1                |
| Otitis media                                             | 1                |
| Meningitis                                               | 1                |
| Pneumococcal meningitis                                  | 2                |
| H influenzae type B meningitis                           | 2                |
| Meningococcal meningitis                                 | 2                |
| Other meningitis                                         | 2                |
| Encephalitis                                             | 1                |
| Diphtheria                                               | 1                |
| Whooping cough                                           | 1                |
| Tetanus                                                  | 1                |
| Measles                                                  | 1                |
| Varicella and herpes zoster                              | 1                |
| Malaria                                                  | 1                |
| Chagas disease                                           | 1                |
| Visceral leishmaniasis                                   | 1                |
| African trypanosomiasis                                  | 1                |
| Schistosomiasis                                          | 1                |
| Cysticercosis                                            | 1                |
| Cystic echinococcosis                                    | 1                |
| Dengue                                                   | 1                |
| Yellow fever                                             | 1                |
| Rabies                                                   | 1                |
| Intestinal nematode infections                           | 1                |
| Ascariasis                                               | 2                |
| Other neglected tropical diseases                        | 1                |
| Maternal disorders                                       | 1                |
| Maternal hemorrhage                                      | 2                |
| Maternal sepsis and other maternal infections            | 2                |
| Maternal hypertensive disorders                          | 2                |
| Maternal obstructed labor and uterine rupture            | 2                |
| Maternal abortion, miscarriage, and ectopic pregnancy    | 2                |
| Indirect maternal deaths                                 | 2                |
| Late maternal deaths                                     | 2                |
| Maternal deaths aggravated by HIV/AIDS                   | 2                |
| Other maternal disorders                                 | 2                |
| Neonatal disorders                                       | 1                |
| Neonatal preterm birth complications                     | 2                |
| Neonatal encephalopathy due to birth asphyxia and trauma | 2                |

**Appendix Table 14: CoDCorrect cause hierarchy with levels**

| Cause name                                         | CoDCorrect level |
|----------------------------------------------------|------------------|
| Neonatal sepsis and other neonatal infections      | 2                |
| Hemolytic disease and other neonatal jaundice      | 2                |
| Other neonatal disorders                           | 2                |
| Nutritional deficiencies                           | 1                |
| Protein-energy malnutrition                        | 2                |
| Iodine deficiency                                  | 2                |
| Iron-deficiency anemia                             | 2                |
| Other nutritional deficiencies                     | 2                |
| Sexually transmitted diseases excluding HIV        | 1                |
| Syphilis                                           | 2                |
| Chlamydial infection                               | 2                |
| Gonococcal infection                               | 2                |
| Other sexually transmitted diseases                | 2                |
| Hepatitis                                          | 1                |
| Acute hepatitis A                                  | 2                |
| Acute hepatitis B                                  | 2                |
| Acute hepatitis C                                  | 2                |
| Acute hepatitis E                                  | 2                |
| Other infectious diseases                          | 1                |
| Lip and oral cavity cancer                         | 1                |
| Nasopharynx cancer                                 | 1                |
| Other pharynx cancer                               | 1                |
| Esophageal cancer                                  | 1                |
| Stomach cancer                                     | 1                |
| Colon and rectum cancer                            | 1                |
| Liver cancer                                       | 1                |
| Liver cancer due to hepatitis B                    | 2                |
| Liver cancer due to hepatitis C                    | 2                |
| Liver cancer due to alcohol use                    | 2                |
| Liver cancer due to other causes                   | 2                |
| Gallbladder and biliary tract cancer               | 1                |
| Pancreatic cancer                                  | 1                |
| Larynx cancer                                      | 1                |
| Tracheal, bronchus, and lung cancer                | 1                |
| Malignant skin melanoma                            | 1                |
| Non-melanoma skin cancer                           | 1                |
| Non-melanoma skin cancer (squamous-cell carcinoma) | 2                |
| Breast cancer                                      | 1                |
| Cervical cancer                                    | 1                |
| Uterine cancer                                     | 1                |
| Ovarian cancer                                     | 1                |
| Prostate cancer                                    | 1                |
| Testicular cancer                                  | 1                |
| Kidney cancer                                      | 1                |
| Bladder cancer                                     | 1                |
| Brain and nervous system cancer                    | 1                |

**Appendix Table 14: CoDCorrect cause hierarchy with levels**

| Cause name                                                     | CoDCorrect level |
|----------------------------------------------------------------|------------------|
| Thyroid cancer                                                 | 1                |
| Mesothelioma                                                   | 1                |
| Hodgkin lymphoma                                               | 1                |
| Non-Hodgkin lymphoma                                           | 1                |
| Multiple myeloma                                               | 1                |
| Leukemia                                                       | 1                |
| Acute lymphoid leukemia                                        | 2                |
| Chronic lymphoid leukemia                                      | 2                |
| Acute myeloid leukemia                                         | 2                |
| Chronic myeloid leukemia                                       | 2                |
| Other neoplasms                                                | 1                |
| Cardiovascular diseases                                        | 1                |
| Rheumatic heart disease                                        | 2                |
| Ischemic heart disease                                         | 2                |
| Cerebrovascular disease                                        | 2                |
| Ischemic stroke                                                | 3                |
| Hemorrhagic stroke                                             | 3                |
| Hypertensive heart disease                                     | 2                |
| Cardiomyopathy and myocarditis                                 | 2                |
| Atrial fibrillation and flutter                                | 2                |
| Aortic aneurysm                                                | 2                |
| Peripheral vascular disease                                    | 2                |
| Endocarditis                                                   | 2                |
| Other cardiovascular and circulatory diseases                  | 2                |
| Chronic respiratory diseases                                   | 1                |
| Chronic obstructive pulmonary disease                          | 2                |
| Pneumoconiosis                                                 | 2                |
| Silicosis                                                      | 3                |
| Asbestosis                                                     | 3                |
| Coal workers pneumoconiosis                                    | 3                |
| Other pneumoconiosis                                           | 3                |
| Asthma                                                         | 2                |
| Interstitial lung disease and pulmonary sarcoidosis            | 2                |
| Other chronic respiratory diseases                             | 2                |
| Cirrhosis and other chronic liver diseases                     | 1                |
| Cirrhosis and other chronic liver diseases due to hepatitis B  | 2                |
| Cirrhosis and other chronic liver diseases due to hepatitis C  | 2                |
| Cirrhosis and other chronic liver diseases due to alcohol use  | 2                |
| Cirrhosis and other chronic liver diseases due to other causes | 2                |
| Digestive diseases                                             | 1                |
| Peptic ulcer disease                                           | 2                |
| Gastritis and duodenitis                                       | 2                |
| Appendicitis                                                   | 2                |
| Paralytic ileus and intestinal obstruction                     | 2                |
| Inguinal, femoral, and abdominal hernia                        | 2                |
| Inflammatory bowel disease                                     | 2                |

**Appendix Table 14: CoDCorrect cause hierarchy with levels**

| Cause name                                          | CoDCorrect level |
|-----------------------------------------------------|------------------|
| Vascular intestinal disorders                       | 2                |
| Gallbladder and biliary diseases                    | 2                |
| Pancreatitis                                        | 2                |
| Other digestive diseases                            | 2                |
| Alzheimer disease and other dementias               | 1                |
| Parkinson disease                                   | 1                |
| Epilepsy                                            | 1                |
| Multiple sclerosis                                  | 1                |
| Motor neuron disease                                | 1                |
| Other neurological disorders                        | 1                |
| Schizophrenia                                       | 1                |
| Alcohol use disorders                               | 1                |
| Drug use disorders                                  | 1                |
| Opioid use disorders                                | 2                |
| Cocaine use disorders                               | 2                |
| Amphetamine use disorders                           | 2                |
| Other drug use disorders                            | 2                |
| Eating disorders                                    | 1                |
| Anorexia nervosa                                    | 2                |
| Bulimia nervosa                                     | 2                |
| Diabetes mellitus                                   | 1                |
| Acute glomerulonephritis                            | 1                |
| Chronic kidney disease                              | 1                |
| Chronic kidney disease due to diabetes mellitus     | 2                |
| Chronic kidney disease due to hypertension          | 2                |
| Chronic kidney disease due to glomerulonephritis    | 2                |
| Chronic kidney disease due to other causes          | 2                |
| Urinary diseases and male infertility               | 1                |
| Interstitial nephritis and urinary tract infections | 2                |
| Urolithiasis                                        | 2                |
| Other urinary diseases                              | 2                |
| Gynecological diseases                              | 1                |
| Uterine fibroids                                    | 2                |
| Polycystic ovarian syndrome                         | 2                |
| Endometriosis                                       | 2                |
| Genital prolapse                                    | 2                |
| Other gynecological diseases                        | 2                |
| Hemoglobinopathies and hemolytic anemias            | 1                |
| Thalassemias                                        | 2                |
| Sickle cell disorders                               | 2                |
| G6PD deficiency                                     | 2                |
| Other hemoglobinopathies and hemolytic anemias      | 2                |
| Endocrine, metabolic, blood, and immune disorders   | 1                |
| Musculoskeletal disorders                           | 1                |
| Rheumatoid arthritis                                | 2                |
| Other musculoskeletal disorders                     | 2                |

**Appendix Table 14: CoDCorrect cause hierarchy with levels**

| Cause name                                      | CoDCorrect level |
|-------------------------------------------------|------------------|
| Congenital anomalies                            | 1                |
| Neural tube defects                             | 2                |
| Congenital heart anomalies                      | 2                |
| Cleft lip and cleft palate                      | 2                |
| Down syndrome                                   | 2                |
| Other chromosomal abnormalities                 | 2                |
| Other congenital anomalies                      | 2                |
| Skin and subcutaneous diseases                  | 1                |
| Cellulitis                                      | 2                |
| Pyoderma                                        | 2                |
| Decubitus ulcer                                 | 2                |
| Other skin and subcutaneous diseases            | 2                |
| Sudden infant death syndrome                    | 1                |
| Transport injuries                              | 1                |
| Road injuries                                   | 2                |
| Pedestrian road injuries                        | 3                |
| Cyclist road injuries                           | 3                |
| Motorcyclist road injuries                      | 3                |
| Motor vehicle road injuries                     | 3                |
| Other road injuries                             | 3                |
| Other transport injuries                        | 2                |
| Falls                                           | 1                |
| Drowning                                        | 1                |
| Fire, heat, and hot substances                  | 1                |
| Poisonings                                      | 1                |
| Unintentional firearm injuries                  | 1                |
| Unintentional suffocation                       | 1                |
| Other exposure to mechanical forces             | 1                |
| Adverse effects of medical treatment            | 1                |
| Animal contact                                  | 1                |
| Venomous animal contact                         | 2                |
| Non-venomous animal contact                     | 2                |
| Pulmonary aspiration and foreign body in airway | 1                |
| Foreign body in other body part                 | 1                |
| Environmental heat and cold exposure            | 1                |
| Other unintentional injuries                    | 1                |
| Self-harm                                       | 1                |
| Interpersonal violence                          | 1                |
| Assault by firearm                              | 2                |
| Assault by sharp object                         | 2                |
| Assault by other means                          | 2                |

**Appendix Table 15: Percent change after CoDCorrect by cause for all ages, both sexes combined, 2015**

| Cause                                | CoDCorrect level | Percent change            |
|--------------------------------------|------------------|---------------------------|
| All causes                           | 0                | 1.9%<br>(0.5% to 3.9%)    |
| Tuberculosis                         | 1                | 11.7%<br>(8.8% to 15.3%)  |
| Diarrheal diseases                   | 1                | 8.2%<br>(4.1% to 13.0%)   |
| Typhoid fever                        | 1                | 2.0%<br>(-8.1% to 12.3%)  |
| Paratyphoid fever                    | 1                | 1.0%<br>(-8.8% to 11.6%)  |
| Other intestinal infectious diseases | 1                | 7.8%<br>(1.3% to 14.7%)   |
| Lower respiratory infections         | 1                | 3.8%<br>(1.4% to 6.9%)    |
| Upper respiratory infections         | 1                | 8.8%<br>(5.2% to 13.0%)   |
| Otitis media                         | 1                | 8.8%<br>(4.6% to 14.2%)   |
| Meningitis                           | 1                | 7.9%<br>(-0.0% to 15.8%)  |
| Pneumococcal meningitis              | 2                | 23.8%<br>(5.1% to 43.9%)  |
| H influenzae type B meningitis       | 2                | 18.1%<br>(-2.5% to 38.6%) |
| Meningococcal meningitis             | 2                | 18.6%<br>(-1.3% to 40.6%) |
| Other meningitis                     | 2                | 15.6%<br>(-1.5% to 33.4%) |
| Encephalitis                         | 1                | 6.0%<br>(1.2% to 12.6%)   |
| Diphtheria                           | 1                | 6.4%<br>(-9.0% to 20.1%)  |
| Whooping cough                       | 1                | 1.1%<br>(-11.9% to 14.0%) |
| Tetanus                              | 1                | 4.8%<br>(-4.1% to 12.2%)  |
| Measles                              | 1                | -3.4%<br>(-31.2% to 8.9%) |
| Varicella and herpes zoster          | 1                | 5.1%<br>(0.6% to 10.6%)   |
| Malaria                              | 1                | 6.2%<br>(-5.0% to 16.9%)  |
| Chagas disease                       | 1                | -3.3%<br>(-4.6% to -1.4%) |
| Visceral leishmaniasis               | 1                | 7.5%<br>(2.2% to 13.0%)   |
| African trypanosomiasis              | 1                | 14.2%<br>(2.3% to 24.8%)  |
| Schistosomiasis                      | 1                | 13.3%<br>(10.1% to 17.2%) |
| Cysticercosis                        | 1                | 13.5%<br>(10.2% to 17.6%) |
| Cystic echinococcosis                | 1                | 7.4%<br>(5.2% to 10.5%)   |
| Dengue                               | 1                | 4.1%<br>(-7.4% to 13.3%)  |
| Yellow fever                         | 1                | 20.8%<br>(13.1% to 29.0%) |

**Appendix Table 15: Percent change after CoDCorrect by cause for all ages, both sexes combined, 2015**

| Cause                                                    | CoDCorrect level | Percent change              |
|----------------------------------------------------------|------------------|-----------------------------|
| Rabies                                                   | 1                | 10.4%<br>(5.1% to 16.7%)    |
| Intestinal nematode infections                           | 1                | 5.6%<br>(-2.3% to 14.3%)    |
| Ascariasis                                               | 2                | 5.6%<br>(-2.3% to 14.3%)    |
| Other neglected tropical diseases                        | 1                | 7.2%<br>(0.9% to 14.7%)     |
| Maternal disorders                                       | 1                | 7.2%<br>(1.9% to 12.8%)     |
| Maternal hemorrhage                                      | 2                | 5.2%<br>(0.4% to 9.9%)      |
| Maternal sepsis and other maternal infections            | 2                | 5.6%<br>(-0.6% to 11.4%)    |
| Maternal hypertensive disorders                          | 2                | 7.8%<br>(1.8% to 14.7%)     |
| Maternal obstructed labor and uterine rupture            | 2                | 13.6%<br>(6.2% to 22.2%)    |
| Maternal abortion, miscarriage, and ectopic pregnancy    | 2                | 10.9%<br>(5.9% to 17.2%)    |
| Indirect maternal deaths                                 | 2                | 3.1%<br>(-3.1% to 9.2%)     |
| Late maternal deaths                                     | 2                | 5.1%<br>(0.2% to 10.5%)     |
| Maternal deaths aggravated by HIV/AIDS                   | 2                | 1.4%<br>(-5.7% to 7.4%)     |
| Other maternal disorders                                 | 2                | 9.7%<br>(5.2% to 15.6%)     |
| Neonatal disorders                                       | 1                | 1.4%<br>(-1.4% to 5.1%)     |
| Neonatal preterm birth complications                     | 2                | -0.7%<br>(-9.0% to 12.3%)   |
| Neonatal encephalopathy due to birth asphyxia and trauma | 2                | -3.0%<br>(-11.9% to 6.9%)   |
| Neonatal sepsis and other neonatal infections            | 2                | -25.1%<br>(-45.8% to 3.4%)  |
| Hemolytic disease and other neonatal jaundice            | 2                | -3.0%<br>(-17.7% to 15.2%)  |
| Other neonatal disorders                                 | 2                | -26.3%<br>(-44.6% to -4.6%) |
| Nutritional deficiencies                                 | 1                | 3.4%<br>(-8.1% to 12.7%)    |
| Protein-energy malnutrition                              | 2                | 14.7%<br>(-11.9% to 37.6%)  |
| Iodine deficiency                                        | 2                | 19.3%<br>(-6.1% to 53.5%)   |
| Iron-deficiency anemia                                   | 2                | 88.1%<br>(46.4% to 153.7%)  |
| Other nutritional deficiencies                           | 2                | 11.5%<br>(-6.2% to 36.4%)   |
| Sexually transmitted diseases excluding HIV              | 1                | 6.0%<br>(-1.0% to 13.3%)    |
| Syphilis                                                 | 2                | 6.0%<br>(-1.1% to 13.3%)    |
| Chlamydial infection                                     | 2                | 8.7%<br>(4.4% to 12.5%)     |
| Gonococcal infection                                     | 2                | 11.4%<br>(7.8% to 14.6%)    |

**Appendix Table 15: Percent change after CoDCorrect by cause for all ages, both sexes combined, 2015**

| Cause                                             | CoDCorrect level | Percent change               |
|---------------------------------------------------|------------------|------------------------------|
| Other sexually transmitted diseases               | 2                | 11.7%<br>(7.5% to 15.1%)     |
| Hepatitis                                         | 1                | 7.6%<br>(4.9% to 11.8%)      |
| Acute hepatitis A                                 | 2                | -47.9%<br>(-75.6% to 16.9%)  |
| Hepatitis B                                       | 2                | -39.0%<br>(-50.4% to -26.9%) |
| Hepatitis C                                       | 2                | -34.1%<br>(-46.1% to -20.2%) |
| Acute hepatitis E                                 | 2                | -59.1%<br>(-69.6% to -46.8%) |
| Other infectious diseases                         | 1                | 2.5%<br>(-2.5% to 9.1%)      |
| Lip and oral cavity cancer                        | 1                | 2.5%<br>(1.4% to 4.6%)       |
| Nasopharynx cancer                                | 1                | 1.8%<br>(-0.2% to 4.7%)      |
| Other pharynx cancer                              | 1                | 2.8%<br>(1.7% to 4.7%)       |
| Esophageal cancer                                 | 1                | 1.2%<br>(-0.4% to 3.2%)      |
| Stomach cancer                                    | 1                | 0.0%<br>(-1.4% to 1.7%)      |
| Colon and rectum cancer                           | 1                | -0.6%<br>(-1.9% to 1.1%)     |
| Liver cancer                                      | 1                | 0.8%<br>(-1.2% to 3.0%)      |
| Liver cancer due to hepatitis B                   | 2                | 1.3%<br>(-1.2% to 4.2%)      |
| Liver cancer due to hepatitis C                   | 2                | -0.3%<br>(-1.8% to 1.4%)     |
| Liver cancer due to alcohol use                   | 2                | 0.8%<br>(-1.1% to 3.1%)      |
| Liver cancer due to other causes                  | 2                | 0.9%<br>(-1.3% to 3.0%)      |
| Gallbladder and biliary tract cancer              | 1                | -0.6%<br>(-2.2% to 1.1%)     |
| Pancreatic cancer                                 | 1                | -0.5%<br>(-1.7% to 1.0%)     |
| Larynx cancer                                     | 1                | 2.1%<br>(1.0% to 4.1%)       |
| Tracheal, bronchus, and lung cancer               | 1                | -1.3%<br>(-2.6% to 0.4%)     |
| Malignant skin melanoma                           | 1                | -0.9%<br>(-2.1% to 0.8%)     |
| Non-melanoma skin cancer                          | 1                | -0.7%<br>(-1.9% to 1.0%)     |
| Non-melanoma skin cancer(squamous-cell carcinoma) | 2                | inf%<br>(inf% to inf%)       |
| Breast cancer                                     | 1                | 1.6%<br>(-0.1% to 3.3%)      |
| Cervical cancer                                   | 1                | 6.1%<br>(2.7% to 9.0%)       |
| Uterine cancer                                    | 1                | 2.2%<br>(0.3% to 4.3%)       |
| Ovarian cancer                                    | 1                | 1.3%<br>(-0.3% to 3.2%)      |



**Appendix Table 15: Percent change after CoDCorrect by cause for all ages, both sexes combined, 2015**

| Cause                                         | CoDCorrect level | Percent change               |
|-----------------------------------------------|------------------|------------------------------|
| Prostate cancer                               | 1                | -0.6%<br>(-2.0% to 1.1%)     |
| Testicular cancer                             | 1                | 5.4%<br>(3.4% to 9.8%)       |
| Kidney cancer                                 | 1                | -0.4%<br>(-1.7% to 1.3%)     |
| Bladder cancer                                | 1                | -0.4%<br>(-1.6% to 1.0%)     |
| Brain and nervous system cancer               | 1                | 1.0%<br>(-0.8% to 3.5%)      |
| Thyroid cancer                                | 1                | 0.8%<br>(-0.5% to 2.8%)      |
| Mesothelioma                                  | 1                | -0.9%<br>(-2.2% to 0.7%)     |
| Hodgkin lymphoma                              | 1                | 3.4%<br>(1.3% to 6.0%)       |
| Non-Hodgkin lymphoma                          | 1                | 1.0%<br>(-0.5% to 3.5%)      |
| Multiple myeloma                              | 1                | 0.4%<br>(-0.8% to 2.0%)      |
| Leukemia                                      | 1                | 1.2%<br>(-0.9% to 4.1%)      |
| Acute lymphoid leukemia                       | 2                | 132.1%<br>(118.6% to 151.5%) |
| Chronic lymphoid leukemia                     | 2                | 66.8%<br>(59.8% to 77.1%)    |
| Acute myeloid leukemia                        | 2                | 81.9%<br>(75.5% to 95.8%)    |
| Chronic myeloid leukemia                      | 2                | 95.4%<br>(86.8% to 108.9%)   |
| Other neoplasms                               | 1                | 2.9%<br>(0.9% to 5.5%)       |
| Cardiovascular diseases                       | 1                | 0.2%<br>(-0.9% to 1.7%)      |
| Rheumatic heart disease                       | 2                | 6.3%<br>(2.9% to 10.6%)      |
| Ischemic heart disease                        | 2                | 2.0%<br>(0.2% to 4.2%)       |
| Cerebrovascular disease                       | 2                | 1.8%<br>(-0.4% to 4.1%)      |
| Ischemic stroke                               | 3                | -4.3%<br>(-8.4% to -1.0%)    |
| Hemorrhagic stroke                            | 3                | -0.8%<br>(-3.7% to 3.7%)     |
| Hypertensive heart disease                    | 2                | 4.2%<br>(1.6% to 7.2%)       |
| Cardiomyopathy and myocarditis                | 2                | 0.6%<br>(-1.9% to 3.4%)      |
| Atrial fibrillation and flutter               | 2                | -0.7%<br>(-3.1% to 1.9%)     |
| Aortic aneurysm                               | 2                | 1.7%<br>(-0.4% to 4.0%)      |
| Peripheral vascular disease                   | 2                | -0.9%<br>(-3.2% to 1.5%)     |
| Endocarditis                                  | 2                | -0.4%<br>(-2.9% to 2.2%)     |
| Other cardiovascular and circulatory diseases | 2                | 3.1%<br>(0.4% to 6.0%)       |

**Appendix Table 15: Percent change after CoDCorrect by cause for all ages, both sexes combined, 2015**

| Cause                                                          | CoDCorrect level | Percent change            |
|----------------------------------------------------------------|------------------|---------------------------|
| Chronic respiratory diseases                                   | 1                | 2.7%<br>(1.4% to 4.6%)    |
| Chronic obstructive pulmonary disease                          | 2                | 28.6%<br>(21.3% to 37.6%) |
| Pneumoconiosis                                                 | 2                | 16.6%<br>(8.3% to 24.2%)  |
| Silicosis                                                      | 3                | 21.1%<br>(7.1% to 37.1%)  |
| Asbestosis                                                     | 3                | 5.6%<br>(-8.4% to 20.4%)  |
| Coal workers pneumoconiosis                                    | 3                | 26.4%<br>(12.3% to 44.5%) |
| Other pneumoconiosis                                           | 3                | 23.3%<br>(-2.5% to 44.6%) |
| Asthma                                                         | 2                | 24.1%<br>(3.4% to 36.7%)  |
| Interstitial lung disease and pulmonary sarcoidosis            | 2                | 13.7%<br>(9.0% to 25.2%)  |
| Other chronic respiratory diseases                             | 2                | 23.3%<br>(11.8% to 36.2%) |
| Cirrhosis and other chronic liver diseases                     | 1                | 4.5%<br>(2.6% to 7.6%)    |
| Cirrhosis and other chronic liver diseases due to hepatitis B  | 2                | 5.0%<br>(3.1% to 8.1%)    |
| Cirrhosis and other chronic liver diseases due to hepatitis C  | 2                | 2.8%<br>(1.5% to 5.6%)    |
| Cirrhosis and other chronic liver diseases due to alcohol use  | 2                | 5.8%<br>(3.7% to 9.1%)    |
| Cirrhosis and other chronic liver diseases due to other causes | 2                | 4.0%<br>(1.7% to 7.2%)    |
| Digestive diseases                                             | 1                | 4.8%<br>(3.5% to 6.9%)    |
| Peptic ulcer disease                                           | 2                | 36.9%<br>(30.0% to 46.4%) |
| Gastritis and duodenitis                                       | 2                | 26.8%<br>(18.0% to 40.4%) |
| Appendicitis                                                   | 2                | 65.4%<br>(52.0% to 82.7%) |
| Paralytic ileus and intestinal obstruction                     | 2                | 33.6%<br>(26.6% to 49.2%) |
| Inguinal, femoral, and abdominal hernia                        | 2                | 57.2%<br>(35.2% to 75.1%) |
| Inflammatory bowel disease                                     | 2                | 25.4%<br>(19.4% to 36.1%) |
| Vascular intestinal disorders                                  | 2                | 14.0%<br>(9.2% to 21.8%)  |
| Gallbladder and biliary diseases                               | 2                | 22.8%<br>(17.8% to 31.1%) |
| Pancreatitis                                                   | 2                | 37.6%<br>(28.9% to 47.4%) |
| Other digestive diseases                                       | 2                | 19.1%<br>(14.5% to 27.4%) |
| Alzheimer disease and other dementias                          | 1                | -2.9%<br>(-5.0% to -0.8%) |
| Parkinson disease                                              | 1                | -2.1%<br>(-3.9% to -0.3%) |
| Epilepsy                                                       | 1                | 7.5%<br>(2.8% to 12.7%)   |

**Appendix Table 15: Percent change after CoDCorrect by cause for all ages, both sexes combined, 2015**

| Cause                                               | CoDCorrect level | Percent change               |
|-----------------------------------------------------|------------------|------------------------------|
| Multiple sclerosis                                  | 1                | 0.9%<br>(-0.4% to 3.1%)      |
| Motor neuron disease                                | 1                | -0.5%<br>(-1.5% to 1.1%)     |
| Other neurological disorders                        | 1                | 2.0%<br>(0.1% to 4.9%)       |
| Schizophrenia                                       | 1                | -0.1%<br>(-2.6% to 2.3%)     |
| Alcohol use disorders                               | 1                | 2.8%<br>(1.1% to 5.6%)       |
| Drug use disorders                                  | 1                | 1.4%<br>(-0.7% to 5.2%)      |
| Opioid use disorders                                | 2                | 13.2%<br>(5.0% to 22.0%)     |
| Cocaine use disorders                               | 2                | 5.0%<br>(-1.8% to 19.8%)     |
| Amphetamine use disorders                           | 2                | 7.9%<br>(-5.8% to 17.7%)     |
| Other drug use disorders                            | 2                | 24.2%<br>(16.8% to 38.8%)    |
| Eating disorders                                    | 1                | 3.0%<br>(-0.4% to 7.4%)      |
| Anorexia nervosa                                    | 2                | -0.2%<br>(-37.1% to 57.4%)   |
| Bulimia nervosa                                     | 2                | -10.9%<br>(-44.1% to 30.1%)  |
| Diabetes mellitus                                   | 1                | 1.9%<br>(0.8% to 3.7%)       |
| Acute glomerulonephritis                            | 1                | 1.6%<br>(-1.4% to 4.7%)      |
| Chronic kidney disease                              | 1                | 2.3%<br>(1.1% to 4.0%)       |
| Chronic kidney disease due to diabetes mellitus     | 2                | 1.0%<br>(-0.0% to 2.3%)      |
| Chronic kidney disease due to hypertension          | 2                | 2.8%<br>(1.4% to 4.5%)       |
| Chronic kidney disease due to glomerulonephritis    | 2                | 3.1%<br>(1.6% to 5.7%)       |
| Chronic kidney disease due to other causes          | 2                | 4.6%<br>(2.3% to 7.3%)       |
| Urinary diseases and male infertility               | 1                | 2.3%<br>(0.6% to 4.6%)       |
| Interstitial nephritis and urinary tract infections | 2                | 15.8%<br>(7.6% to 41.2%)     |
| Urolithiasis                                        | 2                | 22.9%<br>(11.2% to 50.7%)    |
| Other urinary diseases                              | 2                | 25.6%<br>(14.7% to 53.2%)    |
| Gynecological diseases                              | 1                | 7.7%<br>(4.3% to 11.8%)      |
| Uterine fibroids                                    | 2                | 80.5%<br>(43.8% to 150.5%)   |
| Polycystic ovarian syndrome                         | 2                | 217.2%<br>(113.2% to 445.7%) |
| Endometriosis                                       | 2                | 29.5%<br>(-0.8% to 101.3%)   |
| Genital prolapse                                    | 2                | 256.6%<br>(159.9% to 458.8%) |

**Appendix Table 15: Percent change after CoDCorrect by cause for all ages, both sexes combined, 2015**

| Cause                                             | CoDCorrect level | Percent change               |
|---------------------------------------------------|------------------|------------------------------|
| Other gynecological diseases                      | 2                | 166.2%<br>(120.1% to 266.0%) |
| Hemoglobinopathies and hemolytic anemias          | 1                | 5.6%<br>(-6.2% to 13.1%)     |
| Thalassemias                                      | 2                | 3.0%<br>(-3.3% to 11.0%)     |
| Sickle cell disorders                             | 2                | 4.7%<br>(-13.3% to 16.6%)    |
| G6PD deficiency                                   | 2                | 13.8%<br>(9.6% to 19.6%)     |
| Other hemoglobinopathies and hemolytic anemias    | 2                | 5.0%<br>(3.4% to 7.6%)       |
| Endocrine, metabolic, blood, and immune disorders | 1                | 0.6%<br>(-1.1% to 2.8%)      |
| Musculoskeletal disorders                         | 1                | -0.6%<br>(-2.2% to 1.4%)     |
| Rheumatoid arthritis                              | 2                | -2.7%<br>(-12.9% to 11.5%)   |
| Other musculoskeletal disorders                   | 2                | -4.7%<br>(-16.3% to 8.9%)    |
| Congenital anomalies                              | 1                | 3.8%<br>(0.2% to 7.8%)       |
| Neural tube defects                               | 2                | -31.7%<br>(-55.4% to -8.0%)  |
| Congenital heart anomalies                        | 2                | -5.8%<br>(-20.2% to 9.3%)    |
| Cleft lip and cleft palate                        | 2                | 23.5%<br>(7.3% to 43.5%)     |
| Down syndrome                                     | 2                | 3.4%<br>(-31.9% to 36.2%)    |
| Other chromosomal abnormalities                   | 2                | 4.4%<br>(-20.8% to 22.2%)    |
| Other congenital anomalies                        | 2                | -7.1%<br>(-27.5% to 9.4%)    |
| Skin and subcutaneous diseases                    | 1                | 3.2%<br>(1.0% to 6.9%)       |
| Cellulitis                                        | 2                | 19.2%<br>(-16.7% to 74.7%)   |
| Pyoderma                                          | 2                | 15.8%<br>(-22.7% to 61.4%)   |
| Decubitus ulcer                                   | 2                | -0.0%<br>(-35.1% to 32.8%)   |
| Other skin and subcutaneous diseases              | 2                | 16.9%<br>(-14.9% to 60.2%)   |
| Sudden infant death syndrome                      | 1                | 6.8%<br>(-0.3% to 14.6%)     |
| Transport injuries                                | 1                | 5.2%<br>(2.3% to 9.4%)       |
| Road injuries                                     | 2                | 22.9%<br>(14.9% to 33.4%)    |
| Pedestrian road injuries                          | 3                | 5.5%<br>(-0.0% to 15.1%)     |
| Cyclist road injuries                             | 3                | 0.0%<br>(-5.2% to 7.5%)      |
| Motorcyclist road injuries                        | 3                | 3.2%<br>(-16.2% to 13.2%)    |
| Motor vehicle road injuries                       | 3                | 4.6%<br>(-4.6% to 13.0%)     |

**Appendix Table 15: Percent change after CoDCorrect by cause for all ages, both sexes combined, 2015**

| Cause                                           | CoDCorrect level | Percent change              |
|-------------------------------------------------|------------------|-----------------------------|
| Other road injuries                             | 3                | 17.4%<br>(3.3% to 27.9%)    |
| Other transport injuries                        | 2                | 50.0%<br>(30.9% to 87.3%)   |
| Falls                                           | 1                | 2.4%<br>(0.5% to 5.7%)      |
| Drowning                                        | 1                | 3.7%<br>(-1.4% to 8.8%)     |
| Fire, heat, and hot substances                  | 1                | 7.6%<br>(2.9% to 13.0%)     |
| Poisonings                                      | 1                | 4.1%<br>(-2.5% to 9.1%)     |
| Unintentional firearm injuries                  | 1                | 7.9%<br>(5.5% to 10.7%)     |
| Unintentional suffocation                       | 1                | 3.8%<br>(-1.2% to 11.3%)    |
| Other exposure to mechanical forces             | 1                | 7.0%<br>(3.6% to 12.3%)     |
| Adverse effects of medical treatment            | 1                | 5.6%<br>(3.2% to 8.7%)      |
| Animal contact                                  | 1                | 10.2%<br>(5.0% to 16.7%)    |
| Venomous animal contact                         | 2                | 20.3%<br>(-30.5% to 65.0%)  |
| Non-venomous animal contact                     | 2                | 8.3%<br>(-16.5% to 23.9%)   |
| Pulmonary aspiration and foreign body in airway | 1                | 3.3%<br>(-0.1% to 7.4%)     |
| Foreign body in other body part                 | 1                | 10.9%<br>(6.4% to 15.0%)    |
| Environmental heat and cold exposure            | 1                | 3.5%<br>(1.0% to 5.3%)      |
| Other unintentional injuries                    | 1                | 3.7%<br>(0.4% to 9.2%)      |
| Self-harm                                       | 1                | 4.1%<br>(1.7% to 7.2%)      |
| Interpersonal violence                          | 1                | 5.3%<br>(3.2% to 8.8%)      |
| Assault by firearm                              | 2                | -6.6%<br>(-14.2% to 0.7%)   |
| Assault by sharp object                         | 2                | 0.4%<br>(-5.0% to 8.3%)     |
| Assault by other means                          | 2                | -14.8%<br>(-23.0% to -5.5%) |

**Appendix Table 16: Socio-demographic Index R-squared values with lags up to 10 years**

| Lag | Dependent variable |             |             |             |
|-----|--------------------|-------------|-------------|-------------|
|     | e(0)               | ln(5q0)     | ln(35q15)   | ln(20q50)   |
| 0   | 0.681994619        | 0.835376171 | 0.519579323 | 0.470820415 |
| 2   | 0.67991699         | 0.835048597 | 0.520681003 | 0.473563281 |
| 3   | 0.67791076         | 0.834639505 | 0.522034759 | 0.476302175 |
| 4   | 0.675989602        | 0.834141334 | 0.523504615 | 0.479087639 |
| 5   | 0.67426007         | 0.833518294 | 0.525187012 | 0.48214452  |
| 6   | 0.672623022        | 0.832851608 | 0.527000772 | 0.485216989 |
| 7   | 0.671019072        | 0.832170023 | 0.528934908 | 0.488198411 |
| 8   | 0.669486465        | 0.831486249 | 0.5310748   | 0.491090142 |
| 9   | 0.667847247        | 0.830665055 | 0.533024474 | 0.494156402 |
| 10  | 0.666130136        | 0.829796867 | 0.534926801 | 0.497156619 |

**Appendix Table 17: SDI coefficients with and without year covariate**

|                                                                              | Dependent variable |              |              |              |
|------------------------------------------------------------------------------|--------------------|--------------|--------------|--------------|
|                                                                              | e(0)               | ln(5q0)      | ln(35q15)    | ln(20q50)    |
| $y = \beta + \beta \cdot \text{SDI} + \varepsilon$                           | 33.82272364        | -4.780312011 | -2.331768871 | -1.356952682 |
| $y = \beta + \beta \cdot \text{SDI} + \beta \cdot \text{year} + \varepsilon$ | 33.96954892        | -4.709489588 | -2.429613707 | -1.345386666 |

**Appendix Table 18: SDI groupings based on 2015 values**

| Location             | SDI level |
|----------------------|-----------|
| Aichi                | High SDI  |
| Akita                | High SDI  |
| Alabama              | High SDI  |
| Alaska               | High SDI  |
| Andorra              | High SDI  |
| Antigua and Barbuda  | High SDI  |
| Aomori               | High SDI  |
| Arizona              | High SDI  |
| Arkansas             | High SDI  |
| Australia            | High SDI  |
| Austria              | High SDI  |
| Beijing              | High SDI  |
| Belarus              | High SDI  |
| Belgium              | High SDI  |
| Bermuda              | High SDI  |
| Brunei               | High SDI  |
| California           | High SDI  |
| Canada               | High SDI  |
| Chiba                | High SDI  |
| Colorado             | High SDI  |
| Connecticut          | High SDI  |
| Cyprus               | High SDI  |
| Czech Republic       | High SDI  |
| Delaware             | High SDI  |
| Denmark              | High SDI  |
| District of Columbia | High SDI  |
| Distrito Federal     | High SDI  |
| Distrito Federal     | High SDI  |
| East Midlands        | High SDI  |
| East of England      | High SDI  |
| Ehime                | High SDI  |
| Estonia              | High SDI  |
| Finland              | High SDI  |
| Florida              | High SDI  |
| France               | High SDI  |
| Fukui                | High SDI  |
| Fukuoka              | High SDI  |
| Fukushima            | High SDI  |
| Georgia              | High SDI  |
| Germany              | High SDI  |
| Gifu                 | High SDI  |
| Greater London       | High SDI  |
| Guam                 | High SDI  |
| Gunma                | High SDI  |
| Hawaii               | High SDI  |



**Appendix Table 18: SDI groupings based on 2015 values**

| Location                                         | SDI level |
|--------------------------------------------------|-----------|
| Hiroshima                                        | High SDI  |
| Hokkaidō                                         | High SDI  |
| Hong Kong Special Administrative Region of China | High SDI  |
| Hungary                                          | High SDI  |
| Hyōgo                                            | High SDI  |
| Ibaraki                                          | High SDI  |
| Iceland                                          | High SDI  |
| Idaho                                            | High SDI  |
| Illinois                                         | High SDI  |
| Indiana                                          | High SDI  |
| Iowa                                             | High SDI  |
| Ireland                                          | High SDI  |
| Ishikawa                                         | High SDI  |
| Israel                                           | High SDI  |
| Italy                                            | High SDI  |
| Iwate                                            | High SDI  |
| Kagawa                                           | High SDI  |
| Kagoshima                                        | High SDI  |
| Kanagawa                                         | High SDI  |
| Kansas                                           | High SDI  |
| Kentucky                                         | High SDI  |
| Kōchi                                            | High SDI  |
| Kumamoto                                         | High SDI  |
| Kuwait                                           | High SDI  |
| Kyōto                                            | High SDI  |
| Latvia                                           | High SDI  |
| Lithuania                                        | High SDI  |
| Louisiana                                        | High SDI  |
| Luxembourg                                       | High SDI  |
| Macao Special Administrative Region of China     | High SDI  |
| Maine                                            | High SDI  |
| Maryland                                         | High SDI  |
| Massachusetts                                    | High SDI  |
| Michigan                                         | High SDI  |
| Mie                                              | High SDI  |
| Minnesota                                        | High SDI  |
| Mississippi                                      | High SDI  |
| Missouri                                         | High SDI  |
| Miyagi                                           | High SDI  |
| Miyazaki                                         | High SDI  |
| Montana                                          | High SDI  |
| Nagano                                           | High SDI  |
| Nagasaki                                         | High SDI  |
| Nara                                             | High SDI  |

**Appendix Table 18: SDI groupings based on 2015 values**

| Location                 | SDI level |
|--------------------------|-----------|
| Nebraska                 | High SDI  |
| Netherlands              | High SDI  |
| Nevada                   | High SDI  |
| New Hampshire            | High SDI  |
| New Jersey               | High SDI  |
| New Mexico               | High SDI  |
| New York                 | High SDI  |
| New Zealand              | High SDI  |
| Niigata                  | High SDI  |
| North Carolina           | High SDI  |
| North Dakota             | High SDI  |
| North West England       | High SDI  |
| Northern Mariana Islands | High SDI  |
| Norway                   | High SDI  |
| Ohio                     | High SDI  |
| Årta                     | High SDI  |
| Okayama                  | High SDI  |
| Okinawa                  | High SDI  |
| Oklahoma                 | High SDI  |
| Oregon                   | High SDI  |
| Åsaka                    | High SDI  |
| Pennsylvania             | High SDI  |
| Poland                   | High SDI  |
| Puerto Rico              | High SDI  |
| Rhode Island             | High SDI  |
| Russia                   | High SDI  |
| Saga                     | High SDI  |
| Saitama                  | High SDI  |
| Scotland                 | High SDI  |
| Shanghai                 | High SDI  |
| Shiga                    | High SDI  |
| Shimane                  | High SDI  |
| Shizuoka                 | High SDI  |
| Singapore                | High SDI  |
| Slovakia                 | High SDI  |
| Slovenia                 | High SDI  |
| South Carolina           | High SDI  |
| South Dakota             | High SDI  |
| South East England       | High SDI  |
| South Korea              | High SDI  |
| South West England       | High SDI  |
| Stockholm                | High SDI  |
| Sweden except Stockholm  | High SDI  |
| Switzerland              | High SDI  |
| Taiwan                   | High SDI  |

**Appendix Table 18: SDI groupings based on 2015 values**

| Location                 | SDI level       |
|--------------------------|-----------------|
| Tennessee                | High SDI        |
| Texas                    | High SDI        |
| The Bahamas              | High SDI        |
| Tianjin                  | High SDI        |
| Tochigi                  | High SDI        |
| Tokushima                | High SDI        |
| TÅkyÅ                    | High SDI        |
| Tottori                  | High SDI        |
| Toyama                   | High SDI        |
| Trinidad and Tobago      | High SDI        |
| United Arab Emirates     | High SDI        |
| Utah                     | High SDI        |
| Vermont                  | High SDI        |
| Virgin Islands, U.S.     | High SDI        |
| Virginia                 | High SDI        |
| Wakayama                 | High SDI        |
| Wales                    | High SDI        |
| Washington               | High SDI        |
| West Midlands            | High SDI        |
| West Virginia            | High SDI        |
| Wisconsin                | High SDI        |
| Wyoming                  | High SDI        |
| Yamagata                 | High SDI        |
| Yamaguchi                | High SDI        |
| Yamanashi                | High SDI        |
| Yorkshire and the Humber | High SDI        |
| 'Asir                    | High-middle SDI |
| Aguascalientes           | High-middle SDI |
| Albania                  | High-middle SDI |
| American Samoa           | High-middle SDI |
| Andhra Pradesh, Urban    | High-middle SDI |
| Argentina                | High-middle SDI |
| Armenia                  | High-middle SDI |
| Azerbaijan               | High-middle SDI |
| Bahah                    | High-middle SDI |
| Bahrain                  | High-middle SDI |
| Baja California          | High-middle SDI |
| Baja California Sur      | High-middle SDI |
| Barbados                 | High-middle SDI |
| Bosnia and Herzegovina   | High-middle SDI |
| Bulgaria                 | High-middle SDI |
| Campeche                 | High-middle SDI |
| Chihuahua                | High-middle SDI |
| Chile                    | High-middle SDI |
| Coahuila                 | High-middle SDI |

**Appendix Table 18: SDI groupings based on 2015 values**

| Location                | SDI level       |
|-------------------------|-----------------|
| Colima                  | High-middle SDI |
| Colombia                | High-middle SDI |
| Costa Rica              | High-middle SDI |
| Croatia                 | High-middle SDI |
| Cuba                    | High-middle SDI |
| Delhi, Rural            | High-middle SDI |
| Delhi, Urban            | High-middle SDI |
| Dominica                | High-middle SDI |
| Dominican Republic      | High-middle SDI |
| Durango                 | High-middle SDI |
| Eastern Cape            | High-middle SDI |
| Eastern Province        | High-middle SDI |
| Ecuador                 | High-middle SDI |
| Esp rito Santo          | High-middle SDI |
| Fiji                    | High-middle SDI |
| Free State              | High-middle SDI |
| Gauteng                 | High-middle SDI |
| Georgia                 | High-middle SDI |
| Goa, Rural              | High-middle SDI |
| Goa, Urban              | High-middle SDI |
| Greece                  | High-middle SDI |
| Greenland               | High-middle SDI |
| Grenada                 | High-middle SDI |
| Guangdong               | High-middle SDI |
| Ha'il                   | High-middle SDI |
| Hary na, Urban          | High-middle SDI |
| Heilongjiang            | High-middle SDI |
| Himachal Pradesh, Urban | High-middle SDI |
| Inner Mongolia          | High-middle SDI |
| Iran                    | High-middle SDI |
| Jalisco                 | High-middle SDI |
| Jamaica                 | High-middle SDI |
| Jawf                    | High-middle SDI |
| Jiangsu                 | High-middle SDI |
| Jilin                   | High-middle SDI |
| Jordan                  | High-middle SDI |
| Karn taka, Urban        | High-middle SDI |
| Kazakhstan              | High-middle SDI |
| KwaZulu-Natal           | High-middle SDI |
| Lebanon                 | High-middle SDI |
| Liaoning                | High-middle SDI |
| Macedonia               | High-middle SDI |
| Madinah                 | High-middle SDI |
| Mah r shtra, Urban      | High-middle SDI |
| Makkah                  | High-middle SDI |

**Appendix Table 18: SDI groupings based on 2015 values**

| Location                         | SDI level       |
|----------------------------------|-----------------|
| Malaysia                         | High-middle SDI |
| Malta                            | High-middle SDI |
| Mauritius                        | High-middle SDI |
| México                           | High-middle SDI |
| Moldova                          | High-middle SDI |
| Mongolia                         | High-middle SDI |
| Montenegro                       | High-middle SDI |
| Morelos                          | High-middle SDI |
| Mpumalanga                       | High-middle SDI |
| Nairobi                          | High-middle SDI |
| Nayarit                          | High-middle SDI |
| North East England               | High-middle SDI |
| North-West                       | High-middle SDI |
| Northern Borders                 | High-middle SDI |
| Northern Cape                    | High-middle SDI |
| Northern Ireland                 | High-middle SDI |
| Nuevo León                       | High-middle SDI |
| Oman                             | High-middle SDI |
| Panama                           | High-middle SDI |
| Peru                             | High-middle SDI |
| Portugal                         | High-middle SDI |
| Punjab, Urban                    | High-middle SDI |
| Qassim                           | High-middle SDI |
| Qatar                            | High-middle SDI |
| Querétaro                        | High-middle SDI |
| Quintana Roo                     | High-middle SDI |
| Rio de Janeiro                   | High-middle SDI |
| Rio Grande do Sul                | High-middle SDI |
| Riyadh                           | High-middle SDI |
| Romania                          | High-middle SDI |
| Saint Lucia                      | High-middle SDI |
| Saint Vincent and the Grenadines | High-middle SDI |
| San Luis Potosí                  | High-middle SDI |
| Santa Catarina                   | High-middle SDI |
| São Paulo                        | High-middle SDI |
| Serbia                           | High-middle SDI |
| Seychelles                       | High-middle SDI |
| Shandong                         | High-middle SDI |
| Shanxi                           | High-middle SDI |
| Sikkim, Urban                    | High-middle SDI |
| Sinaloa                          | High-middle SDI |
| Sonora                           | High-middle SDI |
| Spain                            | High-middle SDI |
| Sri Lanka                        | High-middle SDI |
| Suriname                         | High-middle SDI |

**Appendix Table 18: SDI groupings based on 2015 values**

| Location                         | SDI level       |
|----------------------------------|-----------------|
| Tabasco                          | High-middle SDI |
| Tabuk                            | High-middle SDI |
| Tamaulipas                       | High-middle SDI |
| Tamil NĀdu, Urban                | High-middle SDI |
| Thailand                         | High-middle SDI |
| The Six Minor Territories, Urban | High-middle SDI |
| Tlaxcala                         | High-middle SDI |
| Turkey                           | High-middle SDI |
| Turkmenistan                     | High-middle SDI |
| Ukraine                          | High-middle SDI |
| Uruguay                          | High-middle SDI |
| Uttarakhand, Urban               | High-middle SDI |
| Uzbekistan                       | High-middle SDI |
| Venezuela                        | High-middle SDI |
| Western Cape                     | High-middle SDI |
| YucatĀjn                         | High-middle SDI |
| Zhejiang                         | High-middle SDI |
| Acre                             | Middle SDI      |
| Algeria                          | Middle SDI      |
| AmapĀj                           | Middle SDI      |
| Amazonas                         | Middle SDI      |
| Andhra Pradesh, Rural            | Middle SDI      |
| Anhui                            | Middle SDI      |
| ArunĀchal Pradesh, Urban         | Middle SDI      |
| Assam, Urban                     | Middle SDI      |
| Bahia                            | Middle SDI      |
| Belize                           | Middle SDI      |
| BihĀr, Urban                     | Middle SDI      |
| Bolivia                          | Middle SDI      |
| Botswana                         | Middle SDI      |
| ChhattĀsgarh, Urban              | Middle SDI      |
| Chiapas                          | Middle SDI      |
| Chongqing                        | Middle SDI      |
| Egypt                            | Middle SDI      |
| El Salvador                      | Middle SDI      |
| Equatorial Guinea                | Middle SDI      |
| Federated States of Micronesia   | Middle SDI      |
| Fujian                           | Middle SDI      |
| Gabon                            | Middle SDI      |
| Gansu                            | Middle SDI      |
| GoiĀs                            | Middle SDI      |
| Guanajuato                       | Middle SDI      |
| Guangxi                          | Middle SDI      |
| Guerrero                         | Middle SDI      |
| GujarĀt, Urban                   | Middle SDI      |

**Appendix Table 18: SDI groupings based on 2015 values**

| Location                 | SDI level  |
|--------------------------|------------|
| Guyana                   | Middle SDI |
| Hainan                   | Middle SDI |
| Haryana, Rural           | Middle SDI |
| Hebei                    | Middle SDI |
| Henan                    | Middle SDI |
| Hidalgo                  | Middle SDI |
| Himachal Pradesh, Rural  | Middle SDI |
| Honduras                 | Middle SDI |
| Hubei                    | Middle SDI |
| Hunan                    | Middle SDI |
| Indonesia                | Middle SDI |
| Iraq                     | Middle SDI |
| Jammu and Kashmir, Urban | Middle SDI |
| Jharkhand, Urban         | Middle SDI |
| Jiangxi                  | Middle SDI |
| Jizan                    | Middle SDI |
| Kerala, Rural            | Middle SDI |
| Kerala, Urban            | Middle SDI |
| Kiambu                   | Middle SDI |
| Kyrgyzstan               | Middle SDI |
| Laikipia                 | Middle SDI |
| Libya                    | Middle SDI |
| Limpopo                  | Middle SDI |
| Madhya Pradesh, Urban    | Middle SDI |
| Maharashtra, Rural       | Middle SDI |
| Maldives                 | Middle SDI |
| Manipur, Urban           | Middle SDI |
| Marshall Islands         | Middle SDI |
| Mato Grosso              | Middle SDI |
| Mato Grosso do Sul       | Middle SDI |
| Meghalaya, Urban         | Middle SDI |
| Michoacán de Ocampo      | Middle SDI |
| Minas Gerais             | Middle SDI |
| Mizoram, Urban           | Middle SDI |
| Mombasa                  | Middle SDI |
| Nagaland, Rural          | Middle SDI |
| Nagaland, Urban          | Middle SDI |
| Najran                   | Middle SDI |
| Namibia                  | Middle SDI |
| Nicaragua                | Middle SDI |
| Ningxia                  | Middle SDI |
| North Korea              | Middle SDI |
| Nyeri                    | Middle SDI |
| Oaxaca                   | Middle SDI |
| Orissa, Urban            | Middle SDI |

**Appendix Table 18: SDI groupings based on 2015 values**

| Location                         | SDI level      |
|----------------------------------|----------------|
| Palestine                        | Middle SDI     |
| Paraguay                         | Middle SDI     |
| Paraguay                         | Middle SDI     |
| Paraná                           | Middle SDI     |
| Pernambuco                       | Middle SDI     |
| Philippines                      | Middle SDI     |
| Puebla                           | Middle SDI     |
| Punjab, Rural                    | Middle SDI     |
| Qinghai                          | Middle SDI     |
| Rajasthan, Urban                 | Middle SDI     |
| Rio Grande do Norte              | Middle SDI     |
| Rondonia                         | Middle SDI     |
| Roraima                          | Middle SDI     |
| Samoa                            | Middle SDI     |
| Sergipe                          | Middle SDI     |
| Shaanxi                          | Middle SDI     |
| Sichuan                          | Middle SDI     |
| Sikkim, Rural                    | Middle SDI     |
| Swaziland                        | Middle SDI     |
| Syria                            | Middle SDI     |
| Tajikistan                       | Middle SDI     |
| Tamil Nadu, Rural                | Middle SDI     |
| Telangana, Urban                 | Middle SDI     |
| The Six Minor Territories, Rural | Middle SDI     |
| Tocantins                        | Middle SDI     |
| Tonga                            | Middle SDI     |
| Tripura, Urban                   | Middle SDI     |
| Tunisia                          | Middle SDI     |
| Uttar Pradesh, Urban             | Middle SDI     |
| Uttarakhand, Rural               | Middle SDI     |
| Veracruz de Ignacio de la Llave  | Middle SDI     |
| Vietnam                          | Middle SDI     |
| West Bengal, Urban               | Middle SDI     |
| Xinjiang                         | Middle SDI     |
| Yunnan                           | Middle SDI     |
| Zacatecas                        | Middle SDI     |
| Alagoas                          | Low-middle SDI |
| Angola                           | Low-middle SDI |
| Arunachal Pradesh, Rural         | Low-middle SDI |
| Assam, Rural                     | Low-middle SDI |
| Bangladesh                       | Low-middle SDI |
| Bhutan                           | Low-middle SDI |
| Bihar, Rural                     | Low-middle SDI |
| Bomet                            | Low-middle SDI |
| Bungoma                          | Low-middle SDI |



**Appendix Table 18: SDI groupings based on 2015 values**

| Location                 | SDI level      |
|--------------------------|----------------|
| Cambodia                 | Low-middle SDI |
| Cameroon                 | Low-middle SDI |
| Cape Verde               | Low-middle SDI |
| Cear                     | Low-middle SDI |
| Chhatt garh, Rural       | Low-middle SDI |
| Congo                    | Low-middle SDI |
| Djibouti                 | Low-middle SDI |
| Elgeyo-Marakwet          | Low-middle SDI |
| Embu                     | Low-middle SDI |
| Ghana                    | Low-middle SDI |
| Guatemala                | Low-middle SDI |
| Guizhou                  | Low-middle SDI |
| Gujar t, Rural           | Low-middle SDI |
| Haiti                    | Low-middle SDI |
| HomaBay                  | Low-middle SDI |
| Jammu and Kashm r, Rural | Low-middle SDI |
| Jharkhand, Rural         | Low-middle SDI |
| Kajiado                  | Low-middle SDI |
| Kakamega                 | Low-middle SDI |
| Karn taka, Rural         | Low-middle SDI |
| Kericho                  | Low-middle SDI |
| Kiribati                 | Low-middle SDI |
| Kirinyaga                | Low-middle SDI |
| Kisii                    | Low-middle SDI |
| Kisumu                   | Low-middle SDI |
| Kwale                    | Low-middle SDI |
| Lamu                     | Low-middle SDI |
| Laos                     | Low-middle SDI |
| Lesotho                  | Low-middle SDI |
| Machakos                 | Low-middle SDI |
| Madhya Pradesh, Rural    | Low-middle SDI |
| Makueni                  | Low-middle SDI |
| Manipur, Rural           | Low-middle SDI |
| Maranh o                 | Low-middle SDI |
| Megh laya, Rural         | Low-middle SDI |
| Meru                     | Low-middle SDI |
| Migori                   | Low-middle SDI |
| Mizoram, Rural           | Low-middle SDI |
| Morocco                  | Low-middle SDI |
| Murang Ma                | Low-middle SDI |
| Myanmar                  | Low-middle SDI |
| Nakuru                   | Low-middle SDI |
| Nandi                    | Low-middle SDI |
| Nepal                    | Low-middle SDI |
| Nigeria                  | Low-middle SDI |

**Appendix Table 18: SDI groupings based on 2015 values**

| Location                         | SDI level      |
|----------------------------------|----------------|
| Nyamira                          | Low-middle SDI |
| Nyandarua                        | Low-middle SDI |
| Orissa, Rural                    | Low-middle SDI |
| Pakistan                         | Low-middle SDI |
| Papua New Guinea                 | Low-middle SDI |
| ParaÃ-ba                         | Low-middle SDI |
| Piaui                            | Low-middle SDI |
| RÃjasthÃn, Rural                 | Low-middle SDI |
| Sao Tome and Principe            | Low-middle SDI |
| Siaya                            | Low-middle SDI |
| Solomon Islands                  | Low-middle SDI |
| Sudan                            | Low-middle SDI |
| Taita Taveta                     | Low-middle SDI |
| Tanzania                         | Low-middle SDI |
| Telangana, Rural                 | Low-middle SDI |
| TharakaNithi                     | Low-middle SDI |
| Tibet                            | Low-middle SDI |
| Timor-Leste                      | Low-middle SDI |
| TransNzoia                       | Low-middle SDI |
| Tripura, Rural                   | Low-middle SDI |
| UasinGishu                       | Low-middle SDI |
| Uttar Pradesh, Rural             | Low-middle SDI |
| Vanuatu                          | Low-middle SDI |
| Vihiga                           | Low-middle SDI |
| West Bengal, Rural               | Low-middle SDI |
| Yemen                            | Low-middle SDI |
| Zambia                           | Low-middle SDI |
| Zimbabwe                         | Low-middle SDI |
| Afghanistan                      | Low SDI        |
| Baringo                          | Low SDI        |
| Benin                            | Low SDI        |
| Burkina Faso                     | Low SDI        |
| Burundi                          | Low SDI        |
| Busia                            | Low SDI        |
| Central African Republic         | Low SDI        |
| Chad                             | Low SDI        |
| Comoros                          | Low SDI        |
| Cote d'Ivoire                    | Low SDI        |
| Democratic Republic of the Congo | Low SDI        |
| Eritrea                          | Low SDI        |
| Ethiopia                         | Low SDI        |
| Garissa                          | Low SDI        |
| Guinea                           | Low SDI        |
| Guinea-Bissau                    | Low SDI        |
| Isiolo                           | Low SDI        |

**Appendix Table 18: SDI groupings based on 2015 values**

| Location     | SDI level |
|--------------|-----------|
| Kilifi       | Low SDI   |
| Kitui        | Low SDI   |
| Liberia      | Low SDI   |
| Madagascar   | Low SDI   |
| Malawi       | Low SDI   |
| Mali         | Low SDI   |
| Mandera      | Low SDI   |
| Marsabit     | Low SDI   |
| Mauritania   | Low SDI   |
| Mozambique   | Low SDI   |
| Narok        | Low SDI   |
| Niger        | Low SDI   |
| Rwanda       | Low SDI   |
| Samburu      | Low SDI   |
| Senegal      | Low SDI   |
| Sierra Leone | Low SDI   |
| Somalia      | Low SDI   |
| South Sudan  | Low SDI   |
| TanaRiver    | Low SDI   |
| The Gambia   | Low SDI   |
| Togo         | Low SDI   |
| Turkana      | Low SDI   |
| Uganda       | Low SDI   |
| Wajir        | Low SDI   |
| WestPokot    | Low SDI   |

Appendix Table 19: Socio-Demographic Index values for all estimated GBD 155 locations, 1980-2015

| Location                                         | 1980   | 1981   | 1982   | 1983   | 1984   | 1985   | 1986   | 1987   | 1988   | 1989   | 1990   | 1991   | 1992   | 1993   | 1994   | 1995   | 1996   | 1997   | 1998   | 1999   | 2000   | 2001   | 2002   | 2003   | 2004   | 2005   | 2006   | 2007   | 2008   | 2009   | 2010   | 2011   | 2012   | 2013   | 2014   | 2015   |        |
|--------------------------------------------------|--------|--------|--------|--------|--------|--------|--------|--------|--------|--------|--------|--------|--------|--------|--------|--------|--------|--------|--------|--------|--------|--------|--------|--------|--------|--------|--------|--------|--------|--------|--------|--------|--------|--------|--------|--------|--------|
| Global                                           | 0.4199 | 0.4256 | 0.4311 | 0.4365 | 0.4424 | 0.4489 | 0.4551 | 0.4617 | 0.4681 | 0.4745 | 0.4811 | 0.4877 | 0.4944 | 0.5011 | 0.5078 | 0.5146 | 0.5214 | 0.5279 | 0.5340 | 0.5398 | 0.5460 | 0.5512 | 0.5568 | 0.5625 | 0.5683 | 0.5748 | 0.5815 | 0.5886 | 0.5953 | 0.6015 | 0.6079 | 0.6143 | 0.6204 | 0.6265 | 0.6324 | 0.6381 |        |
| South East Asia, East Asia, and Oceania          | 0.3345 | 0.3444 | 0.3544 | 0.3636 | 0.3744 | 0.3865 | 0.3973 | 0.4081 | 0.4187 | 0.4284 | 0.4380 | 0.4483 | 0.4596 | 0.4715 | 0.4836 | 0.4957 | 0.5074 | 0.5185 | 0.5281 | 0.5370 | 0.5464 | 0.5555 | 0.5641 | 0.5698 | 0.5782 | 0.5869 | 0.5958 | 0.6052 | 0.6138 | 0.6219 | 0.6301 | 0.6380 | 0.6458 | 0.6533 | 0.6605 | 0.6672 |        |
| East Asia                                        | 0.3249 | 0.3344 | 0.3438 | 0.3538 | 0.3650 | 0.3783 | 0.3901 | 0.4019 | 0.4134 | 0.4237 | 0.4338 | 0.4449 | 0.4572 | 0.4703 | 0.4835 | 0.4967 | 0.5092 | 0.5211 | 0.5316 | 0.5413 | 0.5504 | 0.5592 | 0.5681 | 0.5768 | 0.5858 | 0.5951 | 0.6047 | 0.6149 | 0.6248 | 0.6327 | 0.6410 | 0.6495 | 0.6576 | 0.6653 | 0.6725 | 0.6792 |        |
| China                                            | 0.3160 | 0.3258 | 0.3361 | 0.3452 | 0.3565 | 0.3700 | 0.3819 | 0.3939 | 0.4057 | 0.4161 | 0.4265 | 0.4374 | 0.4502 | 0.4636 | 0.4773 | 0.4909 | 0.5038 | 0.5161 | 0.5298 | 0.5368 | 0.5463 | 0.5553 | 0.5644 | 0.5733 | 0.5826 | 0.5921 | 0.6019 | 0.6124 | 0.6216 | 0.6305 | 0.6395 | 0.6477 | 0.6561 | 0.6639 | 0.6712 | 0.6780 |        |
| Anhui                                            | 0.2770 | 0.2948 | 0.3045 | 0.3140 | 0.3279 | 0.3402 | 0.3532 | 0.3665 | 0.3721 | 0.3790 | 0.3881 | 0.3974 | 0.4102 | 0.4258 | 0.4423 | 0.4598 | 0.4769 | 0.4928 | 0.5098 | 0.4888 | 0.4983 | 0.5075 | 0.5177 | 0.5250 | 0.5318 | 0.5395 | 0.5472 | 0.5558 | 0.5627 | 0.5700 | 0.5793 | 0.5888 | 0.5966 | 0.6051 | 0.5983 | 0.6047 | 0.6110 |
| Beijing                                          | 0.5316 | 0.5177 | 0.5194 | 0.5281 | 0.5258 | 0.5416 | 0.5259 | 0.5609 | 0.5813 | 0.5979 | 0.6038 | 0.6231 | 0.6428 | 0.6529 | 0.6623 | 0.6723 | 0.6828 | 0.6917 | 0.7063 | 0.7099 | 0.7183 | 0.7280 | 0.7388 | 0.7482 | 0.7587 | 0.7697 | 0.7800 | 0.7912 | 0.8025 | 0.8132 | 0.8235 | 0.8325 | 0.8423 | 0.8516 | 0.8605 |        |        |
| Chongqing                                        | 0.2739 | 0.2996 | 0.3065 | 0.3211 | 0.2987 | 0.3053 | 0.3173 | 0.3633 | 0.3735 | 0.3864 | 0.4016 | 0.4089 | 0.4194 | 0.4378 | 0.4490 | 0.4630 | 0.4773 | 0.4894 | 0.5020 | 0.5151 | 0.5288 | 0.5359 | 0.5440 | 0.5492 | 0.5513 | 0.5688 | 0.5753 | 0.5837 | 0.5914 | 0.5994 | 0.6089 | 0.6116 | 0.6144 | 0.6203 | 0.6257 | 0.6309 |        |
| Fujian                                           | 0.3017 | 0.3122 | 0.3218 | 0.3311 | 0.3412 | 0.3577 | 0.3780 | 0.3979 | 0.4094 | 0.4139 | 0.4251 | 0.4411 | 0.4563 | 0.4734 | 0.4892 | 0.5050 | 0.5236 | 0.5367 | 0.5464 | 0.5571 | 0.5781 | 0.5880 | 0.5969 | 0.6063 | 0.6158 | 0.6247 | 0.6341 | 0.6432 | 0.6528 | 0.6623 | 0.6712 | 0.6797 | 0.6887 | 0.6978 | 0.7078 | 0.7179 |        |
| Gansu                                            | 0.2973 | 0.3077 | 0.3142 | 0.3208 | 0.3279 | 0.3406 | 0.3522 | 0.3642 | 0.3728 | 0.3795 | 0.3927 | 0.3988 | 0.4061 | 0.4140 | 0.4231 | 0.4325 | 0.4429 | 0.4572 | 0.4666 | 0.4751 | 0.4832 | 0.4907 | 0.4978 | 0.5055 | 0.5131 | 0.5200 | 0.5284 | 0.5355 | 0.5402 | 0.5454 | 0.5507 | 0.5540 | 0.5607 | 0.5711 | 0.5841 | 0.5908 |        |
| Guangdong                                        | 0.2644 | 0.2774 | 0.2982 | 0.2651 | 0.2380 | 0.3139 | 0.3240 | 0.3388 | 0.3700 | 0.3936 | 0.4041 | 0.4200 | 0.4411 | 0.4702 | 0.4917 | 0.5086 | 0.5264 | 0.5458 | 0.5609 | 0.5765 | 0.5877 | 0.5956 | 0.6066 | 0.6133 | 0.6244 | 0.6359 | 0.6454 | 0.6556 | 0.6647 | 0.6722 | 0.6822 | 0.6996 | 0.7074 | 0.7165 | 0.7284 | 0.7402 |        |
| Guangxi                                          | 0.2408 | 0.2522 | 0.2642 | 0.2819 | 0.2830 | 0.2995 | 0.3177 | 0.3364 | 0.3511 | 0.3688 | 0.3816 | 0.3823 | 0.3958 | 0.4095 | 0.4244 | 0.4398 | 0.4541 | 0.4663 | 0.4763 | 0.4870 | 0.4960 | 0.5066 | 0.5162 | 0.5211 | 0.5327 | 0.5416 | 0.5503 | 0.5615 | 0.5702 | 0.5798 | 0.5917 | 0.6011 | 0.6098 | 0.6195 | 0.6291 | 0.6385 |        |
| Guizhou                                          | 0.1644 | 0.1827 | 0.1954 | 0.2076 | 0.2265 | 0.2523 | 0.2667 | 0.2805 | 0.2909 | 0.3098 | 0.3175 | 0.3234 | 0.3253 | 0.3439 | 0.3561 | 0.3701 | 0.3821 | 0.3915 | 0.4010 | 0.4090 | 0.4191 | 0.4277 | 0.4350 | 0.4468 | 0.4569 | 0.4679 | 0.4773 | 0.4882 | 0.4909 | 0.5012 | 0.5108 | 0.5187 | 0.5262 | 0.5339 | 0.5415 | 0.5489 |        |
| Hainan                                           | 0.3372 | 0.3483 | 0.3562 | 0.3515 | 0.3557 | 0.3606 | 0.3839 | 0.4058 | 0.4126 | 0.4153 | 0.4243 | 0.4325 | 0.4456 | 0.4585 | 0.4715 | 0.4845 | 0.4970 | 0.5090 | 0.5205 | 0.5320 | 0.5416 | 0.5511 | 0.5594 | 0.5689 | 0.5778 | 0.5865 | 0.5953 | 0.6050 | 0.6137 | 0.6224 | 0.6311 | 0.6399 | 0.6492 | 0.6588 | 0.6683 | 0.6774 |        |
| Hebei                                            | 0.3012 | 0.3080 | 0.3102 | 0.3194 | 0.3271 | 0.3358 | 0.3375 | 0.3404 | 0.4054 | 0.4212 | 0.4335 | 0.4505 | 0.4715 | 0.4876 | 0.4910 | 0.5060 | 0.5205 | 0.5128 | 0.5236 | 0.5346 | 0.5490 | 0.5481 | 0.5550 | 0.5568 | 0.5649 | 0.5715 | 0.5827 | 0.5923 | 0.5993 | 0.6056 | 0.6139 | 0.6238 | 0.6338 | 0.6438 | 0.6545 | 0.6651 |        |
| Henan                                            | 0.4107 | 0.4211 | 0.4243 | 0.4322 | 0.4416 | 0.4501 | 0.4553 | 0.4604 | 0.4713 | 0.4766 | 0.4804 | 0.4964 | 0.5026 | 0.5125 | 0.5239 | 0.5369 | 0.5479 | 0.5567 | 0.5652 | 0.5746 | 0.5823 | 0.5898 | 0.5974 | 0.6046 | 0.6116 | 0.6186 | 0.6261 | 0.6340 | 0.6412 | 0.6486 | 0.6557 | 0.6627 | 0.6693 | 0.6756 | 0.6816 | 0.6870 |        |
| Hong Kong Special Administrative Region of China | 0.2599 | 0.2737 | 0.2863 | 0.3021 | 0.3261 | 0.3410 | 0.3521 | 0.3619 | 0.3732 | 0.3806 | 0.3907 | 0.4066 | 0.4202 | 0.4378 | 0.4525 | 0.4675 | 0.4809 | 0.4928 | 0.5032 | 0.5126 | 0.5218 | 0.5308 | 0.5471 | 0.5516 | 0.5630 | 0.5746 | 0.5849 | 0.5976 | 0.6073 | 0.6169 | 0.6265 | 0.6349 | 0.6438 | 0.6530 | 0.6630 | 0.6738 |        |
| Hubei                                            | 0.6812 | 0.6920 | 0.7014 | 0.7095 | 0.7179 | 0.7255 | 0.7341 | 0.7432 | 0.7521 | 0.7599 | 0.7669 | 0.7746 | 0.7823 | 0.7901 | 0.7980 | 0.8055 | 0.8115 | 0.8161 | 0.8194 | 0.8224 | 0.8257 | 0.8294 | 0.8340 | 0.8404 | 0.8449 | 0.8495 | 0.8545 | 0.8589 | 0.8622 | 0.8654 | 0.8686 | 0.8702 | 0.8723 | 0.8743 | 0.8762 | 0.8782 |        |
| Hubei                                            | 0.3301 | 0.3433 | 0.3583 | 0.3660 | 0.3777 | 0.3887 | 0.3979 | 0.4074 | 0.4212 | 0.4283 | 0.4388 | 0.4478 | 0.4582 | 0.4688 | 0.4782 | 0.4888 | 0.5107 | 0.5228 | 0.5367 | 0.5471 | 0.5583 | 0.5688 | 0.5752 | 0.5864 | 0.5929 | 0.6019 | 0.6099 | 0.6173 | 0.6246 | 0.6394 | 0.6459 | 0.6519 | 0.6592 | 0.6662 | 0.6730 | 0.6802 |        |
| Hunan                                            | 0.3095 | 0.3186 | 0.3209 | 0.3331 | 0.3484 | 0.3595 | 0.3692 | 0.3792 | 0.3883 | 0.4020 | 0.4120 | 0.4233 | 0.4406 | 0.4574 | 0.4695 | 0.4825 | 0.4944 | 0.5045 | 0.5142 | 0.5235 | 0.5308 | 0.5375 | 0.5456 | 0.5525 | 0.5611 | 0.5718 | 0.5806 | 0.5900 | 0.5970 | 0.6040 | 0.6108 | 0.6169 | 0.6251 | 0.6340 | 0.6426 | 0.6510 |        |
| Inner Mongolia                                   | 0.3320 | 0.3421 | 0.3502 | 0.3633 | 0.3758 | 0.3954 | 0.4090 | 0.4226 | 0.4305 | 0.4430 | 0.4580 | 0.4648 | 0.4788 | 0.4834 | 0.4965 | 0.5122 | 0.5276 | 0.5410 | 0.5537 | 0.5660 | 0.5779 | 0.5894 | 0.6015 | 0.6104 | 0.6217 | 0.6237 | 0.6326 | 0.6403 | 0.6506 | 0.6598 | 0.6688 | 0.6772 | 0.6852 | 0.6945 | 0.7035 | 0.7115 |        |
| Jiangsu                                          | 0.3724 | 0.3806 | 0.3916 | 0.4044 | 0.4194 | 0.4297 | 0.4429 | 0.4563 | 0.4640 | 0.4682 | 0.4762 | 0.4849 | 0.5012 | 0.5168 | 0.5296 | 0.5446 | 0.5569 | 0.5683 | 0.5787 | 0.5881 | 0.5974 | 0.6069 | 0.6157 | 0.6252 | 0.6342 | 0.6447 | 0.6548 | 0.6655 | 0.6764 | 0.6844 | 0.6925 | 0.7013 | 0.7117 | 0.7207 | 0.7295 | 0.7375 |        |
| Jiangxi                                          | 0.3010 | 0.3100 | 0.3222 | 0.3338 | 0.3432 | 0.3554 | 0.3685 | 0.3821 | 0.3922 | 0.3962 | 0.4046 | 0.4160 | 0.4287 | 0.4382 | 0.4502 | 0.4652 | 0.4801 | 0.4900 | 0.5007 | 0.5096 | 0.5184 | 0.5265 | 0.5353 | 0.5440 | 0.5529 | 0.5615 | 0.5700 | 0.5785 | 0.5871 | 0.6020 | 0.6295 | 0.6588 | 0.6896 | 0.7266 | 0.7676 |        |        |
| Jilin                                            | 0.3815 | 0.3907 | 0.4007 | 0.4116 | 0.4225 | 0.4323 | 0.4410 | 0.4538 | 0.4615 | 0.4699 | 0.4803 | 0.4902 | 0.5021 | 0.5143 | 0.5265 | 0.5427 | 0.5550 | 0.5658 | 0.5763 | 0.5871 | 0.5964 | 0.6065 | 0.6147 | 0.6237 | 0.6326 | 0.6417 | 0.6513 | 0.6615 | 0.6709 | 0.6802 | 0.6894 | 0.7008 | 0.7150 | 0.7228 | 0.7300 |        |        |
| Liaoning                                         | 0.4291 | 0.4406 | 0.4443 | 0.4539 | 0.4686 | 0.4730 | 0.4822 | 0.4910 | 0.5010 | 0.5128 | 0.5194 | 0.5332 | 0.5498 | 0.5498 | 0.5604 | 0.5703 | 0.5804 | 0.5896 | 0.5987 | 0.6083 | 0.6172 | 0.6265 | 0.6340 | 0.6423 | 0.6507 | 0.6591 | 0.6680 | 0.6772 | 0.6860 | 0.6945 | 0.7030 | 0.7113 | 0.7194 | 0.7277 | 0.7346 | 0.7415 |        |
| Macao Special Administrative Region of China     | 0.6366 | 0.6438 | 0.6507 | 0.6549 | 0.6640 | 0.6715 | 0.6798 | 0.6862 | 0.7014 | 0.7122 | 0.7228 | 0.7317 | 0.7412 | 0.7505 | 0.7595 | 0.7687 | 0.7787 | 0.7888 | 0.7943 | 0.7966 | 0.8027 | 0.8129 | 0.8211 | 0.8294 | 0.8384 | 0.8483 | 0.8589 | 0.8683 | 0.8799 | 0.8925 | 0.9064 | 0.9216 | 0.9384 | 0.9568 | 0.9761 |        |        |
| Ningxia                                          | 0.3169 | 0.3372 | 0.3447 | 0.3577 | 0.3627 | 0.3754 | 0.3860 | 0.3976 | 0.4056 | 0.4217 | 0.4325 | 0.4415 | 0.4545 | 0.4671 | 0.4784 | 0.4900 | 0.5019 | 0.5111 | 0.5214 | 0.5296 | 0.5377 | 0.5449 | 0.5519 | 0.5610 | 0.5699 | 0.5772 | 0.5865 | 0.5979 | 0.6075 | 0.6149 | 0.6229 | 0.6310 | 0.6407 | 0.6482 | 0.6556 | 0.6640 |        |
| Qinghai                                          | 0.3005 | 0.3151 | 0.3245 | 0.3308 | 0.3373 | 0.3501 | 0.3575 | 0.3657 | 0.3808 | 0.3903 | 0.3924 | 0.3970 | 0.4055 | 0.4185 | 0.4253 | 0.4341 | 0.4456 | 0.4505 | 0.4583 | 0.4649 | 0.4711 | 0.4764 | 0.4834 | 0.4914 | 0.5000 | 0.5083 | 0.5162 | 0.5246 | 0.5326 | 0.5388 | 0.5411 | 0.5495 | 0.5567 | 0.5644 | 0.5719 | 0.5804 |        |
| Shaanxi                                          | 0.3076 | 0.3161 | 0.3242 | 0.3336 | 0.3413 | 0.3534 | 0.3679 | 0.3827 | 0.3923 | 0.4008 | 0.4093 | 0.4216 | 0.4327 | 0.4473 | 0.4601 | 0.4755 | 0.4897 | 0.5023 | 0.5129 | 0.5240 | 0.5343 | 0.5450 | 0.5541 | 0.5625 | 0.5724 | 0.5834 | 0.5927 | 0.6034 | 0.6131 | 0.6227 | 0.6339 | 0.6442 | 0.6508 | 0.6560 | 0.6604 | 0.6641 |        |
| Shandong                                         | 0.3279 | 0.3385 | 0.3532 | 0.3634 | 0.3777 | 0.3940 | 0.4014 | 0.4073 | 0.4303 | 0.4439 | 0.4523 | 0.4640 | 0.4828 | 0.4969 | 0.5113 | 0.5235 | 0.5346 | 0.5440 | 0.5539 | 0.5632 | 0.5711 | 0.5789 | 0.5874 | 0.5958 | 0.6027 | 0.6136 | 0.6254 | 0.6382 | 0.6479 | 0.6559 | 0.6631 | 0.6740 | 0.6828 | 0.6926 | 0.7020 | 0.7110 |        |
| Shanghai                                         | 0.5528 | 0.5550 | 0.5590 | 0.5615 | 0.5661 | 0.5713 |        |        |        |        |        |        |        |        |        |        |        |        |        |        |        |        |        |        |        |        |        |        |        |        |        |        |        |        |        |        |        |

Appendix Table 19: Socio-Demographic Index values for all estimated GBD 2015 locations, 1980-2015

| Location                 | 1980   | 1981   | 1982   | 1983   | 1984   | 1985   | 1986   | 1987   | 1988   | 1989   | 1990   | 1991   | 1992   | 1993   | 1994   | 1995   | 1996   | 1997   | 1998   | 1999   | 2000   | 2001   | 2002   | 2003   | 2004   | 2005   | 2006   | 2007   | 2008   | 2009   | 2010   | 2011   | 2012   | 2013   | 2014   | 2015   |        |
|--------------------------|--------|--------|--------|--------|--------|--------|--------|--------|--------|--------|--------|--------|--------|--------|--------|--------|--------|--------|--------|--------|--------|--------|--------|--------|--------|--------|--------|--------|--------|--------|--------|--------|--------|--------|--------|--------|--------|
| Romania                  | 0.6376 | 0.6639 | 0.6497 | 0.6552 | 0.6604 | 0.6654 | 0.6710 | 0.6762 | 0.6825 | 0.6879 | 0.6931 | 0.6984 | 0.6994 | 0.7001 | 0.7018 | 0.7037 | 0.7065 | 0.7086 | 0.7104 | 0.7128 | 0.7158 | 0.7199 | 0.7247 | 0.7298 | 0.7349 | 0.7407 | 0.7470 | 0.7530 | 0.7631 | 0.7691 | 0.7744 | 0.7800 | 0.7851 | 0.7901 | 0.7947 | 0.7991 |        |
| Serbia                   | 0.6039 | 0.6091 | 0.6140 | 0.6187 | 0.6233 | 0.6279 | 0.6326 | 0.6375 | 0.6426 | 0.6478 | 0.6531 | 0.6579 | 0.6601 | 0.6596 | 0.6589 | 0.6585 | 0.6602 | 0.6632 | 0.6670 | 0.6697 | 0.6741 | 0.6807 | 0.6885 | 0.6966 | 0.7051 | 0.7136 | 0.7218 | 0.7300 | 0.7381 | 0.7468 | 0.7553 | 0.7638 | 0.7726 | 0.7810 | 0.7894 | 0.7978 |        |
| Slovakia                 | 0.6493 | 0.6664 | 0.6632 | 0.6702 | 0.6823 | 0.6883 | 0.6997 | 0.7060 | 0.7123 | 0.7186 | 0.7247 | 0.7311 | 0.7378 | 0.7447 | 0.7526 | 0.7598 | 0.7665 | 0.7729 | 0.7793 | 0.7855 | 0.7915 | 0.7974 | 0.8032 | 0.8096 | 0.8168 | 0.8241 | 0.8327 | 0.8415 | 0.8505 | 0.8611 | 0.8745 | 0.8905 | 0.9105 | 0.9346 | 0.9618 | 0.9865 |        |
| Eastern Europe           | 0.6788 | 0.6874 | 0.6977 | 0.7017 | 0.7115 | 0.7191 | 0.7266 | 0.7338 | 0.7406 | 0.7472 | 0.7529 | 0.7570 | 0.7604 | 0.7641 | 0.7682 | 0.7725 | 0.7774 | 0.7827 | 0.7882 | 0.7941 | 0.8004 | 0.8064 | 0.8123 | 0.8176 | 0.8227 | 0.8273 | 0.8320 | 0.8367 | 0.8416 | 0.8466 | 0.8517 | 0.8568 | 0.8617 | 0.8668 | 0.8719 | 0.8770 |        |
| Latvia                   | 0.6892 | 0.6963 | 0.6972 | 0.7012 | 0.7051 | 0.7092 | 0.7143 | 0.7197 | 0.7254 | 0.7314 | 0.7370 | 0.7431 | 0.7493 | 0.7552 | 0.7609 | 0.7670 | 0.7734 | 0.7798 | 0.7862 | 0.7926 | 0.7991 | 0.8056 | 0.8121 | 0.8176 | 0.8227 | 0.8273 | 0.8320 | 0.8367 | 0.8416 | 0.8466 | 0.8517 | 0.8568 | 0.8617 | 0.8668 | 0.8719 | 0.8770 |        |
| Estonia                  | 0.6495 | 0.6510 | 0.6557 | 0.6605 | 0.6654 | 0.6704 | 0.6754 | 0.6804 | 0.6854 | 0.6904 | 0.6954 | 0.7004 | 0.7054 | 0.7104 | 0.7154 | 0.7204 | 0.7254 | 0.7304 | 0.7354 | 0.7404 | 0.7454 | 0.7504 | 0.7554 | 0.7604 | 0.7654 | 0.7704 | 0.7754 | 0.7804 | 0.7854 | 0.7904 | 0.7954 | 0.8004 | 0.8054 | 0.8104 | 0.8154 | 0.8204 |        |
| Lithuania                | 0.6867 | 0.6904 | 0.6938 | 0.6972 | 0.7004 | 0.7038 | 0.7072 | 0.7106 | 0.7140 | 0.7174 | 0.7208 | 0.7242 | 0.7276 | 0.7310 | 0.7344 | 0.7378 | 0.7412 | 0.7446 | 0.7480 | 0.7514 | 0.7548 | 0.7582 | 0.7616 | 0.7650 | 0.7684 | 0.7718 | 0.7752 | 0.7786 | 0.7820 | 0.7854 | 0.7888 | 0.7922 | 0.7956 | 0.7990 | 0.8024 | 0.8058 |        |
| Moldova                  | 0.6683 | 0.6734 | 0.6783 | 0.6832 | 0.6878 | 0.6922 | 0.6970 | 0.7019 | 0.7071 | 0.7125 | 0.7175 | 0.7220 | 0.7243 | 0.7251 | 0.7253 | 0.7260 | 0.7274 | 0.7301 | 0.7344 | 0.7392 | 0.7449 | 0.7518 | 0.7597 | 0.7682 | 0.7764 | 0.7843 | 0.7922 | 0.8008 | 0.8088 | 0.8173 | 0.8213 | 0.8256 | 0.8296 | 0.8334 | 0.8369 | 0.8403 |        |
| Russia                   | 0.5747 | 0.5781 | 0.5813 | 0.5844 | 0.5875 | 0.5907 | 0.5949 | 0.5995 | 0.6046 | 0.6101 | 0.6156 | 0.6210 | 0.6210 | 0.6214 | 0.6214 | 0.6214 | 0.6214 | 0.6214 | 0.6214 | 0.6214 | 0.6214 | 0.6214 | 0.6214 | 0.6214 | 0.6214 | 0.6214 | 0.6214 | 0.6214 | 0.6214 | 0.6214 | 0.6214 | 0.6214 | 0.6214 | 0.6214 | 0.6214 | 0.6214 |        |
| Ukraine                  | 0.7150 | 0.7185 | 0.7217 | 0.7250 | 0.7281 | 0.7315 | 0.7360 | 0.7414 | 0.7475 | 0.7544 | 0.7613 | 0.7683 | 0.7738 | 0.7769 | 0.7792 | 0.7805 | 0.7819 | 0.7832 | 0.7845 | 0.7858 | 0.7871 | 0.7884 | 0.7897 | 0.7910 | 0.7923 | 0.7936 | 0.7949 | 0.7962 | 0.7975 | 0.7988 | 0.7999 | 0.8011 | 0.8024 | 0.8037 | 0.8050 | 0.8063 | 0.8076 |
| High-income              | 0.6403 | 0.6661 | 0.6518 | 0.6653 | 0.6692 | 0.6731 | 0.6770 | 0.6809 | 0.6848 | 0.6887 | 0.6926 | 0.6965 | 0.6994 | 0.7023 | 0.7052 | 0.7081 | 0.7110 | 0.7139 | 0.7168 | 0.7197 | 0.7226 | 0.7255 | 0.7284 | 0.7313 | 0.7342 | 0.7371 | 0.7400 | 0.7429 | 0.7458 | 0.7487 | 0.7516 | 0.7545 | 0.7574 | 0.7603 | 0.7632 | 0.7661 |        |
| High-income Asia Pacific | 0.7386 | 0.7442 | 0.7490 | 0.7537 | 0.7585 | 0.7634 | 0.7684 | 0.7733 | 0.7784 | 0.7835 | 0.7887 | 0.7938 | 0.7988 | 0.8034 | 0.8082 | 0.8128 | 0.8177 | 0.8226 | 0.8272 | 0.8317 | 0.8361 | 0.8402 | 0.8440 | 0.8474 | 0.8509 | 0.8543 | 0.8579 | 0.8618 | 0.8655 | 0.8686 | 0.8720 | 0.8755 | 0.8789 | 0.8822 | 0.8853 | 0.8884 | 0.8914 |
| Brazil                   | 0.7119 | 0.7188 | 0.7251 | 0.7312 | 0.7376 | 0.7442 | 0.7510 | 0.7579 | 0.7651 | 0.7727 | 0.7802 | 0.7877 | 0.7946 | 0.8012 | 0.8078 | 0.8148 | 0.8217 | 0.8284 | 0.8351 | 0.8416 | 0.8480 | 0.8543 | 0.8599 | 0.8658 | 0.8716 | 0.8774 | 0.8832 | 0.8890 | 0.8949 | 0.9007 | 0.9065 | 0.9123 | 0.9181 | 0.9239 | 0.9297 | 0.9355 | 0.9413 |
| Japan                    | 0.7178 | 0.7254 | 0.7320 | 0.7384 | 0.7433 | 0.7469 | 0.7542 | 0.7613 | 0.7687 | 0.7762 | 0.7839 | 0.7900 | 0.7973 | 0.8050 | 0.8137 | 0.8233 | 0.8325 | 0.8424 | 0.8527 | 0.8625 | 0.8714 | 0.8767 | 0.8815 | 0.8858 | 0.8898 | 0.8934 | 0.8963 | 0.8991 | 0.9021 | 0.9053 | 0.9089 | 0.9121 | 0.9150 | 0.9179 | 0.9206 | 0.9232 | 0.9258 |
| Aichi                    | 0.7495 | 0.7553 | 0.7603 | 0.7648 | 0.7695 | 0.7746 | 0.7798 | 0.7853 | 0.7916 | 0.7964 | 0.8014 | 0.8064 | 0.8114 | 0.8164 | 0.8214 | 0.8264 | 0.8314 | 0.8364 | 0.8414 | 0.8464 | 0.8514 | 0.8564 | 0.8614 | 0.8664 | 0.8714 | 0.8764 | 0.8814 | 0.8864 | 0.8914 | 0.8964 | 0.9014 | 0.9064 | 0.9114 | 0.9164 | 0.9214 | 0.9264 |        |
| Chiba                    | 0.7613 | 0.7674 | 0.7736 | 0.7764 | 0.7808 | 0.7857 | 0.7918 | 0.7960 | 0.8034 | 0.8107 | 0.8177 | 0.8252 | 0.8312 | 0.8374 | 0.8431 | 0.8482 | 0.8534 | 0.8583 | 0.8637 | 0.8692 | 0.8741 | 0.8786 | 0.8834 | 0.8881 | 0.8924 | 0.8972 | 0.9019 | 0.9065 | 0.9111 | 0.9157 | 0.9203 | 0.9249 | 0.9295 | 0.9341 | 0.9387 | 0.9433 |        |
| Osaka                    | 0.7333 | 0.7401 | 0.7444 | 0.7493 | 0.7529 | 0.7604 | 0.7637 | 0.7682 | 0.7747 | 0.7791 | 0.7869 | 0.7936 | 0.7982 | 0.8040 | 0.8083 | 0.8138 | 0.8197 | 0.8248 | 0.8305 | 0.8357 | 0.8410 | 0.8466 | 0.8514 | 0.8561 | 0.8608 | 0.8655 | 0.8702 | 0.8749 | 0.8796 | 0.8843 | 0.8890 | 0.8937 | 0.8984 | 0.9031 | 0.9078 | 0.9125 | 0.9172 |
| Yamanashi                | 0.7357 | 0.7421 | 0.7474 | 0.7512 | 0.7562 | 0.7618 | 0.7659 | 0.7719 | 0.7788 | 0.7843 | 0.7923 | 0.7967 | 0.8038 | 0.8085 | 0.8148 | 0.8188 | 0.8245 | 0.8296 | 0.8352 | 0.8407 | 0.8461 | 0.8514 | 0.8567 | 0.8620 | 0.8673 | 0.8726 | 0.8779 | 0.8832 | 0.8885 | 0.8938 | 0.8991 | 0.9044 | 0.9097 | 0.9150 | 0.9203 | 0.9256 | 0.9309 |
| Chiba                    | 0.7415 | 0.7448 | 0.7507 | 0.7562 | 0.7607 | 0.7664 | 0.7733 | 0.7787 | 0.7853 | 0.7923 | 0.7997 | 0.8066 | 0.8142 | 0.8197 | 0.8258 | 0.8318 | 0.8375 | 0.8432 | 0.8489 | 0.8546 | 0.8603 | 0.8660 | 0.8717 | 0.8774 | 0.8831 | 0.8888 | 0.8945 | 0.9002 | 0.9059 | 0.9116 | 0.9173 | 0.9230 | 0.9287 | 0.9344 | 0.9401 | 0.9458 |        |
| Ihime                    | 0.7971 | 0.8042 | 0.8128 | 0.8175 | 0.8267 | 0.8375 | 0.8492 | 0.8619 | 0.8754 | 0.8900 | 0.9047 | 0.9194 | 0.9341 | 0.9488 | 0.9635 | 0.9782 | 0.9929 | 1.0076 | 1.0223 | 1.0370 | 1.0517 | 1.0664 | 1.0811 | 1.0958 | 1.1105 | 1.1252 | 1.1399 | 1.1546 | 1.1693 | 1.1840 | 1.1987 | 1.2134 | 1.2281 | 1.2428 | 1.2575 | 1.2722 |        |
| Fuku                     | 0.7448 | 0.7522 | 0.7567 | 0.7611 | 0.7663 | 0.7719 | 0.7782 | 0.7850 | 0.7924 | 0.7999 | 0.8077 | 0.8159 | 0.8245 | 0.8331 | 0.8417 | 0.8503 | 0.8589 | 0.8675 | 0.8761 | 0.8847 | 0.8933 | 0.9019 | 0.9105 | 0.9191 | 0.9277 | 0.9363 | 0.9449 | 0.9535 | 0.9621 | 0.9707 | 0.9793 | 0.9879 | 0.9965 | 1.0051 | 1.0137 | 1.0223 |        |
| Fukushima                | 0.7455 | 0.7510 | 0.7557 | 0.7605 | 0.7654 | 0.7704 | 0.7752 | 0.7804 | 0.7854 | 0.7904 | 0.7954 | 0.8004 | 0.8054 | 0.8104 | 0.8154 | 0.8204 | 0.8254 | 0.8304 | 0.8354 | 0.8404 | 0.8454 | 0.8504 | 0.8554 | 0.8604 | 0.8654 | 0.8704 | 0.8754 | 0.8804 | 0.8854 | 0.8904 | 0.8954 | 0.9004 | 0.9054 | 0.9104 | 0.9154 | 0.9204 |        |
| Gifu                     | 0.7312 | 0.7378 | 0.7419 | 0.7463 | 0.7506 | 0.7547 | 0.7604 | 0.7670 | 0.7739 | 0.7811 | 0.7887 | 0.7966 | 0.8047 | 0.8129 | 0.8211 | 0.8293 | 0.8375 | 0.8457 | 0.8539 | 0.8621 | 0.8703 | 0.8785 | 0.8867 | 0.8949 | 0.9031 | 0.9113 | 0.9195 | 0.9277 | 0.9359 | 0.9441 | 0.9523 | 0.9605 | 0.9687 | 0.9769 | 0.9851 | 0.9933 |        |
| Gifu                     | 0.7408 | 0.7469 | 0.7527 | 0.7580 | 0.7632 | 0.7682 | 0.7730 | 0.7776 | 0.7821 | 0.7866 | 0.7911 | 0.7956 | 0.8001 | 0.8046 | 0.8091 | 0.8136 | 0.8181 | 0.8226 | 0.8271 | 0.8316 | 0.8361 | 0.8406 | 0.8451 | 0.8496 | 0.8541 | 0.8586 | 0.8631 | 0.8676 | 0.8721 | 0.8766 | 0.8811 | 0.8856 | 0.8901 | 0.8946 | 0.8991 | 0.9036 |        |
| Gunma                    | 0.7454 | 0.7512 | 0.7560 | 0.7604 | 0.7655 | 0.7699 | 0.7766 | 0.7806 | 0.7870 | 0.7932 | 0.8011 | 0.8072 | 0.8139 | 0.8204 | 0.8263 | 0.8319 | 0.8376 | 0.8435 | 0.8494 | 0.8553 | 0.8612 | 0.8671 | 0.8730 | 0.8789 | 0.8848 | 0.8907 | 0.8966 | 0.9025 | 0.9084 | 0.9143 | 0.9202 | 0.9261 | 0.9320 | 0.9379 | 0.9438 | 0.9497 |        |
| Hiroshima                | 0.7456 | 0.7525 | 0.7563 | 0.7613 | 0.7661 | 0.7710 | 0.7753 | 0.7819 | 0.7887 | 0.7949 | 0.8012 | 0.8074 | 0.8136 | 0.8207 | 0.8278 | 0.8348 | 0.8417 | 0.8486 | 0.8555 | 0.8624 | 0.8693 | 0.8762 | 0.8831 | 0.8900 | 0.8969 | 0.9038 | 0.9107 | 0.9176 | 0.9245 | 0.9314 | 0.9383 | 0.9452 | 0.9521 | 0.9590 | 0.9659 | 0.9728 |        |
| Hokkaido                 | 0.7460 | 0.7521 | 0.7561 | 0.7606 | 0.7656 | 0.7714 | 0.7759 | 0.7817 | 0.7877 | 0.7946 | 0.8005 | 0.8074 | 0.8136 | 0.8203 | 0.8277 | 0.8348 | 0.8417 | 0.8485 | 0.8554 | 0.8623 | 0.8692 | 0.8761 | 0.8830 | 0.8900 | 0.8969 | 0.9038 | 0.9107 | 0.9176 | 0.9245 | 0.9314 | 0.9383 | 0.9452 | 0.9521 | 0.9590 | 0.9659 | 0.9728 |        |
| Hyogo                    | 0.7410 | 0.7471 | 0.7518 | 0.7566 | 0.7613 | 0.7665 | 0.7716 | 0.7780 | 0.7844 | 0.7914 | 0.7975 | 0.8051 | 0.8134 | 0.8217 | 0.8295 | 0.8368 | 0.8441 | 0.8514 | 0.8587 | 0.8660 | 0.8733 | 0.8806 | 0.8879 | 0.8952 | 0.9025 | 0.9098 | 0.9171 | 0.9244 | 0.9317 | 0.9390 | 0.9463 | 0.9536 | 0.9609 | 0.9682 | 0.9755 | 0.9828 |        |
| Ibaraki                  | 0.7456 | 0.7511 | 0.7559 | 0.7611 | 0.7657 | 0.7721 | 0.7770 | 0.7825 | 0.7899 | 0.7962 | 0.8032 | 0.8101 | 0.8164 | 0.8232 | 0.8292 | 0.8348 | 0.8400 | 0.8453 | 0.8506 | 0.8559 | 0.8612 | 0.8665 | 0.8718 | 0.8771 | 0.8824 | 0.8877 | 0.8930 | 0.8983 | 0.9036 | 0.9089 | 0.9142 | 0.9195 | 0.9248 | 0.9301 | 0.9354 | 0.9407 |        |

Appendix Table 19: Socio-Demographic Index values for all estimated GBD 2015 locations, 1980-2015

| Location                  | 1980   | 1981   | 1982   | 1983   | 1984   | 1985   | 1986   | 1987   | 1988   | 1989   | 1990   | 1991   | 1992   | 1993   | 1994   | 1995   | 1996   | 1997   | 1998   | 1999   | 2000     | 2001   | 2002   | 2003   | 2004   | 2005   | 2006   | 2007   | 2008   | 2009   | 2010   | 2011   | 2012   | 2013   | 2014   | 2015   |        |        |
|---------------------------|--------|--------|--------|--------|--------|--------|--------|--------|--------|--------|--------|--------|--------|--------|--------|--------|--------|--------|--------|--------|----------|--------|--------|--------|--------|--------|--------|--------|--------|--------|--------|--------|--------|--------|--------|--------|--------|--------|
| Spain                     | 0.5816 | 0.5902 | 0.5987 | 0.6067 | 0.6146 | 0.6222 | 0.6299 | 0.6377 | 0.6455 | 0.6533 | 0.6610 | 0.6687 | 0.6764 | 0.6840 | 0.6916 | 0.7000 | 0.7074 | 0.7141 | 0.7206 | 0.7271 | 0.7338   | 0.7404 | 0.7469 | 0.7532 | 0.7592 | 0.7653 | 0.7717 | 0.7783 | 0.7848 | 0.7899 | 0.7950 | 0.8001 | 0.8050 | 0.8096 | 0.8143 | 0.8192 |        |        |
| Sweden                    | 0.7422 | 0.7473 | 0.7518 | 0.7557 | 0.7596 | 0.7632 | 0.7669 | 0.7706 | 0.7744 | 0.7785 | 0.7823 | 0.7861 | 0.7894 | 0.7930 | 0.7966 | 0.8007 | 0.8047 | 0.8088 | 0.8126 | 0.8163 | 0.8200   | 0.8245 | 0.8288 | 0.8334 | 0.8378 | 0.8421 | 0.8464 | 0.8507 | 0.8549 | 0.8591 | 0.8633 | 0.8675 | 0.8717 | 0.8758 | 0.8800 | 0.8841 | 0.8881 | 0.8921 |
| Stockholm                 | 0.7792 | 0.7871 | 0.7910 | 0.7957 | 0.7990 | 0.8034 | 0.8089 | 0.8149 | 0.8212 | 0.8277 | 0.8341 | 0.8405 | 0.8471 | 0.8538 | 0.8607 | 0.8678 | 0.8748 | 0.8817 | 0.8886 | 0.8955 | 0.9024   | 0.9093 | 0.9162 | 0.9231 | 0.9300 | 0.9369 | 0.9438 | 0.9507 | 0.9576 | 0.9645 | 0.9714 | 0.9783 | 0.9852 | 0.9921 | 0.9990 | 1.0059 | 1.0128 |        |
| Sweden except Stockholm   | 0.7339 | 0.7385 | 0.7428 | 0.7465 | 0.7505 | 0.7539 | 0.7577 | 0.7615 | 0.7653 | 0.7695 | 0.7740 | 0.7786 | 0.7844 | 0.7902 | 0.7973 | 0.8043 | 0.8114 | 0.8181 | 0.8246 | 0.8305 | 0.8361   | 0.8418 | 0.8488 | 0.8554 | 0.8624 | 0.8694 | 0.8764 | 0.8834 | 0.8904 | 0.8974 | 0.9044 | 0.9114 | 0.9184 | 0.9254 | 0.9324 | 0.9394 | 0.9464 |        |
| Switzerland               | 0.7779 | 0.7835 | 0.7886 | 0.7935 | 0.7985 | 0.8037 | 0.8090 | 0.8144 | 0.8198 | 0.8255 | 0.8314 | 0.8376 | 0.8440 | 0.8507 | 0.8573 | 0.8643 | 0.8714 | 0.8784 | 0.8854 | 0.8924 | 0.8994   | 0.9064 | 0.9134 | 0.9204 | 0.9274 | 0.9344 | 0.9414 | 0.9484 | 0.9554 | 0.9624 | 0.9694 | 0.9764 | 0.9834 | 0.9904 | 0.9974 | 1.0044 | 1.0114 |        |
| United Kingdom            | 0.7264 | 0.7314 | 0.7360 | 0.7407 | 0.7456 | 0.7509 | 0.7563 | 0.7617 | 0.7672 | 0.7727 | 0.7783 | 0.7840 | 0.7896 | 0.7953 | 0.8010 | 0.8067 | 0.8124 | 0.8181 | 0.8238 | 0.8295 | 0.8352   | 0.8409 | 0.8466 | 0.8523 | 0.8580 | 0.8637 | 0.8694 | 0.8751 | 0.8808 | 0.8865 | 0.8922 | 0.8979 | 0.9036 | 0.9093 | 0.9150 | 0.9207 | 0.9264 |        |
| England                   | 0.7408 | 0.7458 | 0.7498 | 0.7544 | 0.7592 | 0.7644 | 0.7698 | 0.7753 | 0.7814 | 0.7874 | 0.7934 | 0.7994 | 0.8054 | 0.8114 | 0.8174 | 0.8234 | 0.8294 | 0.8354 | 0.8414 | 0.8474 | 0.8534   | 0.8594 | 0.8654 | 0.8714 | 0.8774 | 0.8834 | 0.8894 | 0.8954 | 0.9014 | 0.9074 | 0.9134 | 0.9194 | 0.9254 | 0.9314 | 0.9374 | 0.9434 | 0.9494 |        |
| East Midlands             | 0.7468 | 0.7418 | 0.7461 | 0.7509 | 0.7558 | 0.7613 | 0.7668 | 0.7718 | 0.7782 | 0.7835 | 0.7897 | 0.7955 | 0.8008 | 0.8064 | 0.8119 | 0.8172 | 0.8232 | 0.8294 | 0.8348 | 0.8404 | 0.8460   | 0.8521 | 0.8566 | 0.8610 | 0.8653 | 0.8701 | 0.8744 | 0.8792 | 0.8840 | 0.8888 | 0.8936 | 0.8984 | 0.9032 | 0.9080 | 0.9128 | 0.9176 | 0.9224 |        |
| East of England           | 0.6853 | 0.6901 | 0.6957 | 0.7001 | 0.7047 | 0.7097 | 0.7147 | 0.7197 | 0.7249 | 0.7299 | 0.7352 | 0.7407 | 0.7461 | 0.7511 | 0.7559 | 0.7615 | 0.7663 | 0.7719 | 0.7768 | 0.7817 | 0.7865   | 0.7913 | 0.7961 | 0.8009 | 0.8057 | 0.8105 | 0.8153 | 0.8201 | 0.8249 | 0.8297 | 0.8345 | 0.8393 | 0.8441 | 0.8489 | 0.8537 | 0.8585 | 0.8633 |        |
| Greater London            | 0.6159 | 0.6208 | 0.6237 | 0.6281 | 0.6323 | 0.6373 | 0.6425 | 0.6473 | 0.6527 | 0.6587 | 0.6645 | 0.6708 | 0.6764 | 0.6819 | 0.6873 | 0.6926 | 0.6979 | 0.7032 | 0.7084 | 0.7134 | 0.7184   | 0.7234 | 0.7284 | 0.7334 | 0.7384 | 0.7434 | 0.7484 | 0.7534 | 0.7584 | 0.7634 | 0.7684 | 0.7734 | 0.7784 | 0.7834 | 0.7884 | 0.7934 | 0.7984 |        |
| North East England        | 0.6542 | 0.6591 | 0.6635 | 0.6688 | 0.6742 | 0.6788 | 0.6851 | 0.6928 | 0.7008 | 0.7085 | 0.7147 | 0.7197 | 0.7263 | 0.7325 | 0.7395 | 0.7450 | 0.7520 | 0.7587 | 0.7653 | 0.7722 | 0.7795   | 0.7858 | 0.7924 | 0.7987 | 0.8050 | 0.8113 | 0.8176 | 0.8239 | 0.8302 | 0.8365 | 0.8428 | 0.8491 | 0.8554 | 0.8617 | 0.8680 | 0.8743 | 0.8806 | 0.8869 |
| North West England        | 0.7298 | 0.7346 | 0.7382 | 0.7424 | 0.7476 | 0.7525 | 0.7583 | 0.7648 | 0.7709 | 0.7774 | 0.7829 | 0.7885 | 0.7941 | 0.7997 | 0.8053 | 0.8109 | 0.8165 | 0.8221 | 0.8277 | 0.8333 | 0.8389   | 0.8445 | 0.8501 | 0.8557 | 0.8613 | 0.8669 | 0.8725 | 0.8781 | 0.8837 | 0.8893 | 0.8949 | 0.9005 | 0.9061 | 0.9117 | 0.9173 | 0.9229 | 0.9285 |        |
| South East England        | 0.7633 | 0.7682 | 0.7736 | 0.7780 | 0.7830 | 0.7878 | 0.7922 | 0.7975 | 0.8031 | 0.8086 | 0.8146 | 0.8204 | 0.8249 | 0.8294 | 0.8342 | 0.8399 | 0.8457 | 0.8512 | 0.8561 | 0.8620 | 0.8682   | 0.8740 | 0.8788 | 0.8826 | 0.8868 | 0.8905 | 0.8925 | 0.8951 | 0.8979 | 0.8999 | 0.9020 | 0.9040 | 0.9060 | 0.9080 | 0.9100 | 0.9120 | 0.9140 |        |
| South West England        | 0.7435 | 0.7487 | 0.7528 | 0.7578 | 0.7628 | 0.7681 | 0.7732 | 0.7787 | 0.7846 | 0.7909 | 0.7966 | 0.8020 | 0.8080 | 0.8126 | 0.8172 | 0.8240 | 0.8408 | 0.8457 | 0.8512 | 0.8561 | 0.8620   | 0.8682 | 0.8740 | 0.8788 | 0.8826 | 0.8868 | 0.8905 | 0.8925 | 0.8951 | 0.8979 | 0.8999 | 0.9020 | 0.9040 | 0.9060 | 0.9080 | 0.9100 | 0.9120 | 0.9140 |
| West Midlands             | 0.7326 | 0.7374 | 0.7401 | 0.7446 | 0.7494 | 0.7547 | 0.7601 | 0.7659 | 0.7729 | 0.7788 | 0.7843 | 0.7896 | 0.7953 | 0.8005 | 0.8057 | 0.8110 | 0.8157 | 0.8211 | 0.8276 | 0.8333 | 0.8392   | 0.8446 | 0.8495 | 0.8537 | 0.8589 | 0.8606 | 0.8643 | 0.8680 | 0.8717 | 0.8754 | 0.8791 | 0.8828 | 0.8865 | 0.8902 | 0.8939 | 0.8976 | 0.9013 |        |
| Yorkshire and the Humber  | 0.7297 | 0.7347 | 0.7392 | 0.7432 | 0.7485 | 0.7538 | 0.7587 | 0.7651 | 0.7719 | 0.7784 | 0.7841 | 0.7896 | 0.7953 | 0.8000 | 0.8050 | 0.8102 | 0.8164 | 0.8226 | 0.8286 | 0.8340 | 0.8406   | 0.8461 | 0.8516 | 0.8561 | 0.8597 | 0.8633 | 0.8663 | 0.8697 | 0.8715 | 0.8721 | 0.8745 | 0.8768 | 0.8783 | 0.8797 | 0.8814 | 0.8833 | 0.8853 |        |
| Wales                     | 0.6186 | 0.6278 | 0.6354 | 0.6409 | 0.6461 | 0.6511 | 0.6604 | 0.6706 | 0.6796 | 0.6916 | 0.6995 | 0.7069 | 0.7149 | 0.7220 | 0.7297 | 0.7357 | 0.7412 | 0.7488 | 0.7565 | 0.7639 | 0.7731   | 0.7773 | 0.7846 | 0.7912 | 0.7955 | 0.7997 | 0.8029 | 0.8053 | 0.8070 | 0.8086 | 0.8113 | 0.8125 | 0.8144 | 0.8165 | 0.8190 | 0.8216 | 0.8241 |        |
| Scotland                  | 0.7442 | 0.7488 | 0.7572 | 0.7629 | 0.7683 | 0.7735 | 0.7794 | 0.7858 | 0.7922 | 0.7996 | 0.8051 | 0.8090 | 0.8142 | 0.8201 | 0.8261 | 0.8311 | 0.8371 | 0.8417 | 0.8483 | 0.8546 | 0.8606   | 0.8656 | 0.8710 | 0.8757 | 0.8792 | 0.8821 | 0.8855 | 0.8877 | 0.8890 | 0.8911 | 0.8947 | 0.8983 | 0.9015 | 0.9047 | 0.9082 | 0.9118 | 0.9154 |        |
| Latin America             | 0.7128 | 0.7179 | 0.7215 | 0.7271 | 0.7322 | 0.7376 | 0.7433 | 0.7500 | 0.7567 | 0.7641 | 0.7707 | 0.7772 | 0.7825 | 0.7878 | 0.7946 | 0.8000 | 0.8052 | 0.8113 | 0.8187 | 0.8261 | 0.8329   | 0.8394 | 0.8458 | 0.8504 | 0.8548 | 0.8582 | 0.8623 | 0.8655 | 0.8686 | 0.8700 | 0.8708 | 0.8731 | 0.8763 | 0.8796 | 0.8831 | 0.8869 |        |        |
| Argentina                 | 0.5788 | 0.5846 | 0.5894 | 0.5941 | 0.5986 | 0.6023 | 0.6074 | 0.6124 | 0.6171 | 0.6216 | 0.6261 | 0.6318 | 0.6369 | 0.6444 | 0.6543 | 0.6619 | 0.6703 | 0.6786 | 0.6862 | 0.6924 | 0.6979   | 0.7025 | 0.7075 | 0.7128 | 0.7184 | 0.7241 | 0.7298 | 0.7355 | 0.7412 | 0.7470 | 0.7527 | 0.7584 | 0.7641 | 0.7700 | 0.7757 | 0.7814 |        |        |
| Chile                     | 0.5872 | 0.5939 | 0.5996 | 0.6023 | 0.6062 | 0.6100 | 0.6141 | 0.6187 | 0.6241 | 0.6306 | 0.6371 | 0.6444 | 0.6528 | 0.6617 | 0.6707 | 0.6800 | 0.6890 | 0.6980 | 0.7070 | 0.7161 | 0.7254   | 0.7348 | 0.7443 | 0.7539 | 0.7636 | 0.7734 | 0.7831 | 0.7929 | 0.8026 | 0.8124 | 0.8222 | 0.8320 | 0.8418 | 0.8516 | 0.8614 | 0.8712 |        |        |
| Uruguay                   | 0.5662 | 0.5734 | 0.5797 | 0.5826 | 0.5859 | 0.5887 | 0.5925 | 0.5968 | 0.6007 | 0.6047 | 0.6086 | 0.6128 | 0.6183 | 0.6239 | 0.6301 | 0.6355 | 0.6411 | 0.6476 | 0.6538 | 0.6591 | 0.6656   | 0.6717 | 0.6784 | 0.6849 | 0.6918 | 0.6986 | 0.7054 | 0.7122 | 0.7190 | 0.7258 | 0.7326 | 0.7394 | 0.7462 | 0.7530 | 0.7598 | 0.7666 | 0.7734 |        |
| High-income North America | 0.8377 | 0.8401 | 0.8431 | 0.8432 | 0.8432 | 0.8432 | 0.8432 | 0.8432 | 0.8432 | 0.8432 | 0.8432 | 0.8432 | 0.8432 | 0.8432 | 0.8432 | 0.8432 | 0.8432 | 0.8432 | 0.8432 | 0.8432 | 0.8432   | 0.8432 | 0.8432 | 0.8432 | 0.8432 | 0.8432 | 0.8432 | 0.8432 | 0.8432 | 0.8432 | 0.8432 | 0.8432 | 0.8432 | 0.8432 | 0.8432 | 0.8432 | 0.8432 |        |
| Canada                    | 0.8144 | 0.8201 | 0.8247 | 0.8300 | 0.8334 | 0.8379 | 0.8421 | 0.8461 | 0.8504 | 0.8546 | 0.8581 | 0.8607 | 0.8633 | 0.8660 | 0.8694 | 0.8733 | 0.8763 | 0.8815 | 0.8857 | 0.8902 | 0.8949   | 0.8996 | 0.9025 | 0.9065 | 0.9097 | 0.9127 | 0.9151 | 0.9166 | 0.9182 | 0.9202 | 0.9226 | 0.9254 | 0.9284 | 0.9314 | 0.9344 | 0.9374 | 0.9404 |        |
| Greenland                 | 0.5788 | 0.5883 | 0.5985 | 0.6149 | 0.6158 | 0.6079 | 0.6281 | 0.6275 | 0.6094 | 0.6155 | 0.6059 | 0.6154 | 0.5999 | 0.6086 | 0.6148 | 0.6207 | 0.6275 | 0.6089 | 0.6006 | 0.6481 | 0.6420   | 0.6459 | 0.6420 | 0.6688 | 0.6648 | 0.6729 | 0.6606 | 0.6907 | 0.7003 | 0.6993 | 0.7030 | 0.7252 | 0.7439 | 0.7412 | 0.7506 | 0.7575 |        |        |
| United States             | 0.8403 | 0.8433 | 0.8451 | 0.8470 | 0.8496 | 0.8522 | 0.8547 | 0.8568 | 0.8588 | 0.8608 | 0.8628 | 0.8646 | 0.8666 | 0.8686 | 0.8708 | 0.8732 | 0.8759 | 0.8788 | 0.8816 | 0.8845 | 0.8874   | 0.8898 | 0.8921 | 0.8943 | 0.8967 | 0.8994 | 0.9025 | 0.9059 | 0.9093 | 0.9123 | 0.9155 | 0.9188 | 0.9221 | 0.9252 | 0.9282 | 0.9311 |        |        |
| Alabama                   | 0.8073 | 0.8121 | 0.8154 | 0.8175 | 0.8202 | 0.8240 | 0.8268 | 0.8299 | 0.8323 | 0.8346 | 0.8364 | 0.8414 | 0.8447 | 0.8476 | 0.8509 | 0.8537 | 0.8566 | 0.8588 | 0.8618 | 0.8646 | 0.8674   | 0.8723 | 0.8780 | 0.8790 | 0.8824 | 0.8851 | 0.8877 | 0.8904 | 0.8930 | 0.8956 | 0.9004 | 0.9031 | 0.9056 | 0.9124 | 0.9153 | 0.9182 | 0.9213 |        |
| Alaska                    | 0.8805 | 0.8768 | 0.8723 | 0.8714 | 0.8702 | 0.8701 | 0.8738 | 0.8740 | 0.8784 | 0.8770 | 0.8747 | 0.8724 | 0.8724 | 0.8757 | 0.8799 | 0.8801 | 0.8819 | 0.8827 | 0.8849 | 0.8866 | 0.8901   | 0.8899 | 0.8923 | 0.8951 | 0.8984 | 0.8984 | 0.9017 | 0.9002 | 0.9055 | 0.9095 | 0.9123 | 0.9162 | 0.9203 | 0.9243 | 0.9285 | 0.9324 |        |        |
| Arizona                   | 0.8369 | 0.8392 | 0.8412 | 0.8412 | 0.8412 | 0.8440 | 0.8443 | 0.8466 | 0.8481 | 0.8498 | 0.8524 | 0.8527 | 0.8548 | 0.8556 | 0.8569 | 0.8604 | 0.8646 | 0.8671 | 0.8684 | 0.8698 | 0.8721</ |        |        |        |        |        |        |        |        |        |        |        |        |        |        |        |        |        |

Appendix Table 19: Socio-Demographic Index values for all estimated GBD 155 locations, 1980-2015

| Location                         | 1980   | 1981   | 1982   | 1983   | 1984   | 1985   | 1986   | 1987   | 1988   | 1989   | 1990   | 1991   | 1992   | 1993   | 1994   | 1995   | 1996   | 1997   | 1998   | 1999   | 2000   | 2001   | 2002   | 2003   | 2004   | 2005   | 2006   | 2007   | 2008   | 2009   | 2010   | 2011   | 2012   | 2013   | 2014   | 2015   |        |
|----------------------------------|--------|--------|--------|--------|--------|--------|--------|--------|--------|--------|--------|--------|--------|--------|--------|--------|--------|--------|--------|--------|--------|--------|--------|--------|--------|--------|--------|--------|--------|--------|--------|--------|--------|--------|--------|--------|--------|
| Dominican Republic               | 0.4344 | 0.4437 | 0.4523 | 0.4607 | 0.4685 | 0.4756 | 0.4826 | 0.4897 | 0.4971 | 0.5039 | 0.5096 | 0.5151 | 0.5213 | 0.5281 | 0.5348 | 0.5418 | 0.5491 | 0.5568 | 0.5647 | 0.5726 | 0.5803 | 0.5875 | 0.5946 | 0.6007 | 0.6065 | 0.6130 | 0.6202 | 0.6280 | 0.6353 | 0.6422 | 0.6495 | 0.6565 | 0.6632 | 0.6699 | 0.6768 | 0.6837 |        |
| Guatemala                        | 0.4761 | 0.4858 | 0.4958 | 0.5055 | 0.5149 | 0.5242 | 0.5279 | 0.5322 | 0.5362 | 0.5411 | 0.5468 | 0.5514 | 0.5562 | 0.5606 | 0.5654 | 0.5702 | 0.5750 | 0.5802 | 0.5852 | 0.5902 | 0.5952 | 0.6002 | 0.6052 | 0.6102 | 0.6152 | 0.6202 | 0.6252 | 0.6302 | 0.6352 | 0.6402 | 0.6452 | 0.6502 | 0.6552 | 0.6602 | 0.6652 | 0.6702 | 0.6752 |
| Guyana                           | 0.4605 | 0.4664 | 0.4696 | 0.4715 | 0.4735 | 0.4762 | 0.4795 | 0.4832 | 0.4866 | 0.4892 | 0.4917 | 0.4946 | 0.4966 | 0.4986 | 0.5014 | 0.5039 | 0.5064 | 0.5092 | 0.5123 | 0.5152 | 0.5181 | 0.5210 | 0.5239 | 0.5268 | 0.5297 | 0.5326 | 0.5355 | 0.5384 | 0.5413 | 0.5442 | 0.5471 | 0.5500 | 0.5529 | 0.5558 | 0.5587 | 0.5616 | 0.5645 |
| Haiti                            | 0.2545 | 0.2580 | 0.2617 | 0.2661 | 0.2710 | 0.2766 | 0.2820 | 0.2876 | 0.2933 | 0.2986 | 0.3035 | 0.3085 | 0.3137 | 0.3163 | 0.3185 | 0.3218 | 0.3254 | 0.3295 | 0.3341 | 0.3392 | 0.3444 | 0.3494 | 0.3542 | 0.3590 | 0.3629 | 0.3666 | 0.3703 | 0.3740 | 0.3778 | 0.3816 | 0.3854 | 0.3891 | 0.3928 | 0.3965 | 0.4002 | 0.4039 | 0.4076 |
| Honduras                         | 0.5301 | 0.5345 | 0.5393 | 0.5447 | 0.5507 | 0.5565 | 0.5622 | 0.5699 | 0.5755 | 0.5821 | 0.5888 | 0.5953 | 0.6017 | 0.6082 | 0.6145 | 0.6207 | 0.6269 | 0.6330 | 0.6391 | 0.6451 | 0.6511 | 0.6570 | 0.6629 | 0.6688 | 0.6746 | 0.6805 | 0.6863 | 0.6921 | 0.6979 | 0.7037 | 0.7095 | 0.7153 | 0.7211 | 0.7269 | 0.7327 | 0.7385 | 0.7443 |
| Paraguay                         | 0.7052 | 0.7130 | 0.7197 | 0.7250 | 0.7300 | 0.7350 | 0.7400 | 0.7450 | 0.7500 | 0.7550 | 0.7600 | 0.7650 | 0.7700 | 0.7750 | 0.7800 | 0.7850 | 0.7900 | 0.7950 | 0.8000 | 0.8050 | 0.8100 | 0.8150 | 0.8200 | 0.8250 | 0.8300 | 0.8350 | 0.8400 | 0.8450 | 0.8500 | 0.8550 | 0.8600 | 0.8650 | 0.8700 | 0.8750 | 0.8800 | 0.8850 |        |
| Saint Lucia                      | 0.4802 | 0.4929 | 0.5042 | 0.5139 | 0.5219 | 0.5284 | 0.5378 | 0.5466 | 0.5556 | 0.5645 | 0.5734 | 0.5827 | 0.5918 | 0.5998 | 0.6078 | 0.6158 | 0.6238 | 0.6318 | 0.6398 | 0.6478 | 0.6558 | 0.6638 | 0.6718 | 0.6798 | 0.6878 | 0.6958 | 0.7038 | 0.7118 | 0.7198 | 0.7278 | 0.7358 | 0.7438 | 0.7518 | 0.7598 | 0.7678 | 0.7758 |        |
| Saint Vincent and the Grenadines | 0.4918 | 0.5023 | 0.5125 | 0.5226 | 0.5329 | 0.5430 | 0.5528 | 0.5609 | 0.5702 | 0.5782 | 0.5855 | 0.5940 | 0.6013 | 0.6113 | 0.6186 | 0.6264 | 0.6340 | 0.6415 | 0.6488 | 0.6561 | 0.6642 | 0.6704 | 0.6776 | 0.6846 | 0.6916 | 0.6979 | 0.7049 | 0.7114 | 0.7176 | 0.7231 | 0.7279 | 0.7321 | 0.7361 | 0.7401 | 0.7437 | 0.7473 |        |
| Sri Lanka                        | 0.4876 | 0.4958 | 0.5025 | 0.5082 | 0.5132 | 0.5186 | 0.5242 | 0.5292 | 0.5353 | 0.5416 | 0.5476 | 0.5529 | 0.5581 | 0.5625 | 0.5667 | 0.5710 | 0.5762 | 0.5829 | 0.5893 | 0.5943 | 0.5998 | 0.6058 | 0.6112 | 0.6169 | 0.6228 | 0.6285 | 0.6343 | 0.6402 | 0.6463 | 0.6524 | 0.6584 | 0.6644 | 0.6704 | 0.6764 | 0.6824 | 0.6884 |        |
| Trinidad and Tobago              | 0.6293 | 0.6364 | 0.6430 | 0.6495 | 0.6559 | 0.6624 | 0.6688 | 0.6751 | 0.6770 | 0.6813 | 0.6863 | 0.6909 | 0.6953 | 0.7002 | 0.7053 | 0.7111 | 0.7173 | 0.7237 | 0.7308 | 0.7386 | 0.7465 | 0.7545 | 0.7624 | 0.7702 | 0.7780 | 0.7858 | 0.7936 | 0.8014 | 0.8092 | 0.8170 | 0.8248 | 0.8326 | 0.8404 | 0.8482 | 0.8560 | 0.8638 |        |
| Virgin Islands, U.S.             | 0.6970 | 0.7072 | 0.7156 | 0.7225 | 0.7282 | 0.7328 | 0.7376 | 0.7434 | 0.7476 | 0.7559 | 0.7625 | 0.7716 | 0.7780 | 0.7903 | 0.7996 | 0.8088 | 0.8173 | 0.8256 | 0.8331 | 0.8393 | 0.8441 | 0.8490 | 0.8537 | 0.8584 | 0.8637 | 0.8682 | 0.8733 | 0.8780 | 0.8827 | 0.8876 | 0.8924 | 0.8973 | 0.9021 | 0.9070 | 0.9118 | 0.9167 |        |
| Aruba                            | 0.4513 | 0.4600 | 0.4683 | 0.4758 | 0.4830 | 0.4899 | 0.4967 | 0.5036 | 0.5099 | 0.5148 | 0.5197 | 0.5247 | 0.5298 | 0.5352 | 0.5411 | 0.5468 | 0.5522 | 0.5580 | 0.5638 | 0.5696 | 0.5754 | 0.5812 | 0.5870 | 0.5928 | 0.5986 | 0.6044 | 0.6102 | 0.6160 | 0.6218 | 0.6276 | 0.6334 | 0.6392 | 0.6450 | 0.6508 | 0.6566 | 0.6624 | 0.6682 |
| Bolivia                          | 0.3764 | 0.3825 | 0.3884 | 0.3939 | 0.3995 | 0.4050 | 0.4098 | 0.4146 | 0.4193 | 0.4244 | 0.4300 | 0.4363 | 0.4426 | 0.4494 | 0.4565 | 0.4641 | 0.4719 | 0.4798 | 0.4879 | 0.4955 | 0.5028 | 0.5100 | 0.5169 | 0.5237 | 0.5306 | 0.5377 | 0.5451 | 0.5524 | 0.5600 | 0.5673 | 0.5746 | 0.5822 | 0.5898 | 0.5975 | 0.6049 | 0.6120 |        |
| Ecuador                          | 0.4027 | 0.4274 | 0.4341 | 0.4488 | 0.4462 | 0.5034 | 0.5101 | 0.5188 | 0.5222 | 0.5283 | 0.5347 | 0.5411 | 0.5476 | 0.5539 | 0.5602 | 0.5672 | 0.5738 | 0.5802 | 0.5875 | 0.5942 | 0.6007 | 0.6066 | 0.6126 | 0.6185 | 0.6246 | 0.6311 | 0.6384 | 0.6464 | 0.6544 | 0.6624 | 0.6704 | 0.6784 | 0.6864 | 0.6944 | 0.7024 | 0.7104 |        |
| Peru                             | 0.4702 | 0.4792 | 0.4880 | 0.4959 | 0.5035 | 0.5106 | 0.5181 | 0.5260 | 0.5328 | 0.5371 | 0.5410 | 0.5449 | 0.5488 | 0.5534 | 0.5584 | 0.5633 | 0.5683 | 0.5732 | 0.5781 | 0.5830 | 0.5879 | 0.5928 | 0.5976 | 0.6026 | 0.6074 | 0.6122 | 0.6170 | 0.6218 | 0.6266 | 0.6314 | 0.6362 | 0.6410 | 0.6458 | 0.6506 | 0.6554 | 0.6602 | 0.6650 |
| Central Latin America            | 0.4575 | 0.4682 | 0.4778 | 0.4865 | 0.4949 | 0.5029 | 0.5106 | 0.5180 | 0.5250 | 0.5318 | 0.5387 | 0.5457 | 0.5530 | 0.5601 | 0.5673 | 0.5745 | 0.5817 | 0.5889 | 0.5960 | 0.6030 | 0.6100 | 0.6170 | 0.6240 | 0.6310 | 0.6380 | 0.6450 | 0.6520 | 0.6590 | 0.6660 | 0.6730 | 0.6800 | 0.6870 | 0.6940 | 0.7010 | 0.7080 | 0.7150 |        |
| Colombia                         | 0.4681 | 0.4766 | 0.4849 | 0.4929 | 0.5007 | 0.5083 | 0.5160 | 0.5234 | 0.5305 | 0.5374 | 0.5442 | 0.5510 | 0.5578 | 0.5647 | 0.5715 | 0.5783 | 0.5851 | 0.5920 | 0.5988 | 0.6059 | 0.6088 | 0.6136 | 0.6183 | 0.6231 | 0.6282 | 0.6339 | 0.6402 | 0.6471 | 0.6542 | 0.6608 | 0.6673 | 0.6742 | 0.6807 | 0.6868 | 0.6930 | 0.6992 |        |
| Costa Rica                       | 0.5156 | 0.5205 | 0.5246 | 0.5284 | 0.5325 | 0.5364 | 0.5406 | 0.5447 | 0.5490 | 0.5538 | 0.5587 | 0.5641 | 0.5704 | 0.5760 | 0.5817 | 0.5873 | 0.5924 | 0.5980 | 0.6047 | 0.6126 | 0.6210 | 0.6299 | 0.6387 | 0.6472 | 0.6564 | 0.6657 | 0.6748 | 0.6847 | 0.6942 | 0.7036 | 0.7129 | 0.7221 | 0.7313 | 0.7404 | 0.7496 | 0.7588 |        |
| El Salvador                      | 0.3758 | 0.3824 | 0.3882 | 0.3939 | 0.3995 | 0.4050 | 0.4109 | 0.4168 | 0.4228 | 0.4288 | 0.4353 | 0.4424 | 0.4502 | 0.4585 | 0.4671 | 0.4759 | 0.4843 | 0.4929 | 0.5016 | 0.5102 | 0.5186 | 0.5269 | 0.5349 | 0.5425 | 0.5499 | 0.5572 | 0.5646 | 0.5721 | 0.5795 | 0.5870 | 0.5944 | 0.6019 | 0.6092 | 0.6166 | 0.6240 | 0.6314 |        |
| Guatemala                        | 0.3117 | 0.3167 | 0.3218 | 0.3274 | 0.3333 | 0.3394 | 0.3452 | 0.3510 | 0.3568 | 0.3625 | 0.3680 | 0.3739 | 0.3798 | 0.3859 | 0.3924 | 0.4003 | 0.4083 | 0.4166 | 0.4250 | 0.4336 | 0.4429 | 0.4516 | 0.4607 | 0.4692 | 0.4781 | 0.4874 | 0.4969 | 0.5066 | 0.5164 | 0.5264 | 0.5364 | 0.5464 | 0.5564 | 0.5664 | 0.5764 | 0.5864 |        |
| Honduras                         | 0.3092 | 0.3170 | 0.3247 | 0.3321 | 0.3395 | 0.3468 | 0.3535 | 0.3602 | 0.3669 | 0.3736 | 0.3800 | 0.3863 | 0.3930 | 0.4001 | 0.4068 | 0.4140 | 0.4215 | 0.4285 | 0.4362 | 0.4443 | 0.4531 | 0.4590 | 0.4670 | 0.4751 | 0.4834 | 0.4921 | 0.5012 | 0.5104 | 0.5195 | 0.5275 | 0.5350 | 0.5424 | 0.5498 | 0.5565 | 0.5625 | 0.5684 |        |
| Mexico                           | 0.4661 | 0.4800 | 0.4921 | 0.5027 | 0.5127 | 0.5223 | 0.5318 | 0.5411 | 0.5504 | 0.5595 | 0.5684 | 0.5773 | 0.5862 | 0.5950 | 0.6038 | 0.6126 | 0.6213 | 0.6300 | 0.6386 | 0.6472 | 0.6558 | 0.6643 | 0.6728 | 0.6812 | 0.6896 | 0.6979 | 0.7062 | 0.7145 | 0.7227 | 0.7309 | 0.7391 | 0.7472 | 0.7553 | 0.7634 | 0.7714 | 0.7795 |        |
| Agua Dulce                       | 0.4828 | 0.4985 | 0.5112 | 0.5222 | 0.5286 | 0.5296 | 0.5298 | 0.5291 | 0.5287 | 0.5276 | 0.5261 | 0.5243 | 0.5223 | 0.5202 | 0.5181 | 0.5160 | 0.5140 | 0.5120 | 0.5100 | 0.5080 | 0.5060 | 0.5040 | 0.5020 | 0.5000 | 0.4980 | 0.4960 | 0.4940 | 0.4920 | 0.4900 | 0.4880 | 0.4860 | 0.4840 | 0.4820 | 0.4800 | 0.4780 | 0.4760 |        |
| Baja California                  | 0.5383 | 0.5522 | 0.5643 | 0.5742 | 0.5846 | 0.5929 | 0.5992 | 0.6051 | 0.6105 | 0.6160 | 0.6217 | 0.6280 | 0.6343 | 0.6406 | 0.6469 | 0.6539 | 0.6609 | 0.6679 | 0.6749 | 0.6821 | 0.6893 | 0.6964 | 0.7034 | 0.7104 | 0.7174 | 0.7244 | 0.7314 | 0.7384 | 0.7454 | 0.7524 | 0.7594 | 0.7664 | 0.7734 | 0.7804 | 0.7874 | 0.7944 |        |
| Idaho                            | 0.5165 | 0.5229 | 0.5273 | 0.5319 | 0.5367 | 0.5417 | 0.5469 | 0.5523 | 0.5579 | 0.5636 | 0.5694 | 0.5753 | 0.5813 | 0.5874 | 0.5936 | 0.5999 | 0.6063 | 0.6128 | 0.6194 | 0.6260 | 0.6327 | 0.6394 | 0.6461 | 0.6528 | 0.6595 | 0.6662 | 0.6729 | 0.6796 | 0.6863 | 0.6930 | 0.6997 | 0.7064 | 0.7131 | 0.7198 | 0.7265 | 0.7332 |        |
| Campeche                         | 0.4470 | 0.4607 | 0.4726 | 0.4829 | 0.4926 | 0.5029 | 0.5133 | 0.5239 | 0.5321 | 0.5410 | 0.5492 | 0.5568 | 0.5645 | 0.5720 | 0.5794 | 0.5855 | 0.5913 | 0.5970 | 0.6029 | 0.6085 | 0.6150 | 0.6222 | 0.6295 | 0.6363 | 0.6432 | 0.6499 | 0.6571 | 0.6639 | 0.6702 | 0.6765 | 0.6828 | 0.6891 | 0.6954 | 0.7017 | 0.7080 | 0.7143 |        |
| Chiapas                          | 0.3174 | 0.3315 | 0.3437 | 0.3543 | 0.3643 | 0.3747 | 0.3852 | 0.3962 | 0.4048 | 0.4141 | 0.4231 | 0.4320 | 0.4407 | 0.4492 | 0.4576 | 0.4661 | 0.4741 | 0.4816 | 0.4891 | 0.4964 | 0.5035 | 0.5104 | 0.5172 | 0.5240 | 0.5308 | 0.5376 | 0.5444 | 0.5512 | 0.5580 | 0.5648 | 0.5716 | 0.5784 | 0.5852 | 0.5920 | 0.5988 | 0.6056 |        |
| Chihuahua                        | 0.5067 | 0.5201 | 0.5319 | 0.5421 | 0.5517 | 0.5603 | 0.5676 | 0.5744 | 0.5807 | 0.5870 | 0.5931 | 0.5992 | 0.6054 | 0.6115 | 0.6176 | 0.6235 | 0.6293 | 0.6353 | 0.6410 | 0.6469 | 0.6523 | 0.6580 | 0.6639 | 0.6697 | 0.6756 | 0.6814 | 0.6872 | 0.6930 | 0.6988 | 0.7046 | 0.7104 | 0.7162 | 0.7220 | 0.7278 | 0.7336 | 0.7394 | 0.7452 |
| Cuba                             | 0.5324 | 0.5474 | 0.5606 | 0.5720 | 0.5827 | 0.5928 | 0.6024 | 0.6108 | 0.6191 | 0.6273 | 0.6347 | 0.6418 | 0.6488 | 0.6553 | 0.6621 | 0.6677 | 0.6732 | 0.6791 | 0.6850 | 0.6909 | 0.6973 | 0.7038 | 0.7100 | 0.7161 | 0.7224 | 0.7289 | 0.7350 | 0.7410 | 0.7470 | 0.7530 | 0.7590 | 0.7650 | 0.7710 | 0.     |        |        |        |

Appendix Table 19: Socio-Demographic Index values for all estimated GBD 2015 locations, 1980-2015

| Location                     | 1980   | 1981   | 1982   | 1983   | 1984   | 1985   | 1986   | 1987   | 1988   | 1989   | 1990   | 1991   | 1992   | 1993   | 1994   | 1995   | 1996   | 1997   | 1998   | 1999   | 2000   | 2001   | 2002   | 2003   | 2004   | 2005   | 2006   | 2007   | 2008   | 2009   | 2010   | 2011   | 2012   | 2013   | 2014   | 2015   |        |
|------------------------------|--------|--------|--------|--------|--------|--------|--------|--------|--------|--------|--------|--------|--------|--------|--------|--------|--------|--------|--------|--------|--------|--------|--------|--------|--------|--------|--------|--------|--------|--------|--------|--------|--------|--------|--------|--------|--------|
| North Africa and Middle East | 0.3300 | 0.3378 | 0.3462 | 0.3550 | 0.3641 | 0.3737 | 0.3829 | 0.3924 | 0.4025 | 0.4124 | 0.4225 | 0.4325 | 0.4421 | 0.4514 | 0.4602 | 0.4689 | 0.4779 | 0.4868 | 0.4956 | 0.5040 | 0.5121 | 0.5195 | 0.5268 | 0.5337 | 0.5408 | 0.5479 | 0.5550 | 0.5620 | 0.5685 | 0.5745 | 0.5803 | 0.5858 | 0.5908 | 0.5956 | 0.6001 | 0.6045 |        |
| North Africa and Middle East | 0.3300 | 0.3378 | 0.3462 | 0.3550 | 0.3641 | 0.3737 | 0.3829 | 0.3924 | 0.4025 | 0.4124 | 0.4225 | 0.4325 | 0.4421 | 0.4514 | 0.4602 | 0.4689 | 0.4779 | 0.4868 | 0.4956 | 0.5040 | 0.5121 | 0.5195 | 0.5268 | 0.5337 | 0.5408 | 0.5479 | 0.5550 | 0.5620 | 0.5685 | 0.5745 | 0.5803 | 0.5858 | 0.5908 | 0.5956 | 0.6001 | 0.6045 |        |
| Afghanistan                  | 0.1291 | 0.1314 | 0.1336 | 0.1355 | 0.1373 | 0.1392 | 0.1417 | 0.1443 | 0.1478 | 0.1514 | 0.1556 | 0.1602 | 0.1650 | 0.1700 | 0.1752 | 0.1805 | 0.1859 | 0.1914 | 0.1969 | 0.2024 | 0.2079 | 0.2134 | 0.2189 | 0.2244 | 0.2299 | 0.2354 | 0.2409 | 0.2464 | 0.2519 | 0.2574 | 0.2629 | 0.2684 | 0.2739 | 0.2794 | 0.2849 | 0.2904 |        |
| Algeria                      | 0.3173 | 0.3301 | 0.3435 | 0.3560 | 0.3694 | 0.3823 | 0.3947 | 0.4067 | 0.4188 | 0.4311 | 0.4434 | 0.4558 | 0.4682 | 0.4805 | 0.4924 | 0.5042 | 0.5162 | 0.5282 | 0.5402 | 0.5524 | 0.5644 | 0.5764 | 0.5884 | 0.6004 | 0.6124 | 0.6244 | 0.6364 | 0.6484 | 0.6604 | 0.6724 | 0.6844 | 0.6964 | 0.7084 | 0.7204 | 0.7324 | 0.7444 |        |
| Bahrain                      | 0.5059 | 0.5172 | 0.5287 | 0.5390 | 0.5489 | 0.5588 | 0.5687 | 0.5785 | 0.5883 | 0.5981 | 0.6079 | 0.6177 | 0.6275 | 0.6373 | 0.6471 | 0.6569 | 0.6667 | 0.6765 | 0.6863 | 0.6961 | 0.7059 | 0.7157 | 0.7255 | 0.7353 | 0.7451 | 0.7549 | 0.7647 | 0.7745 | 0.7843 | 0.7941 | 0.8039 | 0.8137 | 0.8235 | 0.8333 | 0.8431 | 0.8529 |        |
| Egypt                        | 0.4270 | 0.4346 | 0.4416 | 0.4486 | 0.4556 | 0.4626 | 0.4696 | 0.4766 | 0.4836 | 0.4906 | 0.4976 | 0.5046 | 0.5116 | 0.5186 | 0.5256 | 0.5326 | 0.5396 | 0.5466 | 0.5536 | 0.5606 | 0.5676 | 0.5746 | 0.5816 | 0.5886 | 0.5956 | 0.6026 | 0.6096 | 0.6166 | 0.6236 | 0.6306 | 0.6376 | 0.6446 | 0.6516 | 0.6586 | 0.6656 | 0.6726 |        |
| Iran                         | 0.3456 | 0.3485 | 0.3515 | 0.3546 | 0.3576 | 0.3606 | 0.3636 | 0.3666 | 0.3696 | 0.3726 | 0.3756 | 0.3786 | 0.3816 | 0.3846 | 0.3876 | 0.3906 | 0.3936 | 0.3966 | 0.3996 | 0.4026 | 0.4056 | 0.4086 | 0.4116 | 0.4146 | 0.4176 | 0.4206 | 0.4236 | 0.4266 | 0.4296 | 0.4326 | 0.4356 | 0.4386 | 0.4416 | 0.4446 | 0.4476 | 0.4506 |        |
| Iraq                         | 0.3234 | 0.3327 | 0.3420 | 0.3509 | 0.3598 | 0.3684 | 0.3776 | 0.3867 | 0.3952 | 0.4041 | 0.4134 | 0.4227 | 0.4322 | 0.4419 | 0.4518 | 0.4617 | 0.4717 | 0.4818 | 0.4919 | 0.5020 | 0.5121 | 0.5222 | 0.5323 | 0.5424 | 0.5525 | 0.5626 | 0.5727 | 0.5828 | 0.5929 | 0.6030 | 0.6131 | 0.6232 | 0.6333 | 0.6434 | 0.6535 | 0.6636 |        |
| Jordan                       | 0.3625 | 0.3818 | 0.4007 | 0.4194 | 0.4374 | 0.4551 | 0.4731 | 0.4914 | 0.5099 | 0.5286 | 0.5474 | 0.5663 | 0.5853 | 0.6044 | 0.6235 | 0.6427 | 0.6619 | 0.6812 | 0.7005 | 0.7198 | 0.7391 | 0.7584 | 0.7777 | 0.7970 | 0.8163 | 0.8356 | 0.8549 | 0.8742 | 0.8935 | 0.9128 | 0.9321 | 0.9514 | 0.9707 | 0.9900 | 1.0093 | 1.0286 |        |
| Kuwait                       | 0.5254 | 0.5424 | 0.5599 | 0.5785 | 0.5979 | 0.6181 | 0.6384 | 0.6588 | 0.6802 | 0.6911 | 0.7022 | 0.7088 | 0.7121 | 0.7216 | 0.7260 | 0.7313 | 0.7428 | 0.7548 | 0.7662 | 0.7770 | 0.7871 | 0.7973 | 0.8078 | 0.8182 | 0.8286 | 0.8389 | 0.8493 | 0.8596 | 0.8699 | 0.8802 | 0.8905 | 0.9008 | 0.9111 | 0.9214 | 0.9317 | 0.9420 |        |
| Lebanon                      | 0.5012 | 0.5084 | 0.5126 | 0.5184 | 0.5278 | 0.5394 | 0.5544 | 0.5694 | 0.5844 | 0.5994 | 0.6144 | 0.6294 | 0.6444 | 0.6594 | 0.6744 | 0.6894 | 0.7044 | 0.7194 | 0.7344 | 0.7494 | 0.7644 | 0.7794 | 0.7944 | 0.8094 | 0.8244 | 0.8394 | 0.8544 | 0.8694 | 0.8844 | 0.8994 | 0.9144 | 0.9294 | 0.9444 | 0.9594 | 0.9744 | 0.9894 |        |
| Libya                        | 0.3584 | 0.3715 | 0.3843 | 0.3958 | 0.4069 | 0.4173 | 0.4274 | 0.4374 | 0.4474 | 0.4574 | 0.4674 | 0.4774 | 0.4874 | 0.4974 | 0.5074 | 0.5174 | 0.5274 | 0.5374 | 0.5474 | 0.5574 | 0.5674 | 0.5774 | 0.5874 | 0.5974 | 0.6074 | 0.6174 | 0.6274 | 0.6374 | 0.6474 | 0.6574 | 0.6674 | 0.6774 | 0.6874 | 0.6974 | 0.7074 | 0.7174 |        |
| Monaco                       | 0.2522 | 0.2591 | 0.2669 | 0.2749 | 0.2831 | 0.2916 | 0.3005 | 0.3088 | 0.3180 | 0.3265 | 0.3347 | 0.3434 | 0.3512 | 0.3587 | 0.3669 | 0.3743 | 0.3830 | 0.3908 | 0.3986 | 0.4058 | 0.4123 | 0.4188 | 0.4248 | 0.4307 | 0.4362 | 0.4411 | 0.4468 | 0.4521 | 0.4574 | 0.4626 | 0.4677 | 0.4734 | 0.4789 | 0.4846 | 0.4902 | 0.4959 |        |
| Palestine                    | 0.3528 | 0.3610 | 0.3696 | 0.3795 | 0.3884 | 0.3959 | 0.4023 | 0.4075 | 0.4123 | 0.4173 | 0.4229 | 0.4288 | 0.4341 | 0.4389 | 0.4436 | 0.4483 | 0.4530 | 0.4576 | 0.4623 | 0.4669 | 0.4715 | 0.4761 | 0.4807 | 0.4853 | 0.4899 | 0.4945 | 0.4991 | 0.5037 | 0.5083 | 0.5129 | 0.5175 | 0.5221 | 0.5267 | 0.5313 | 0.5359 | 0.5405 |        |
| Oman                         | 0.2905 | 0.2932 | 0.2995 | 0.3084 | 0.3186 | 0.3306 | 0.3421 | 0.3555 | 0.3716 | 0.3893 | 0.4089 | 0.4306 | 0.4578 | 0.4798 | 0.5005 | 0.5201 | 0.5386 | 0.5576 | 0.5757 | 0.5930 | 0.6098 | 0.6219 | 0.6332 | 0.6430 | 0.6514 | 0.6583 | 0.6663 | 0.6720 | 0.6771 | 0.6812 | 0.6863 | 0.6913 | 0.6964 | 0.7014 | 0.7064 | 0.7114 |        |
| Qatar                        | 0.4963 | 0.5107 | 0.5244 | 0.5375 | 0.5503 | 0.5630 | 0.5742 | 0.5862 | 0.5977 | 0.6078 | 0.6162 | 0.6238 | 0.6305 | 0.6365 | 0.6421 | 0.6473 | 0.6521 | 0.6566 | 0.6608 | 0.6648 | 0.6685 | 0.6719 | 0.6753 | 0.6787 | 0.6820 | 0.6853 | 0.6886 | 0.6919 | 0.6952 | 0.6985 | 0.7018 | 0.7051 | 0.7084 | 0.7117 | 0.7150 | 0.7183 | 0.7216 |
| Saudi Arabia                 | 0.4005 | 0.4179 | 0.4355 | 0.4532 | 0.4844 | 0.4832 | 0.4909 | 0.4985 | 0.5065 | 0.5149 | 0.5243 | 0.5333 | 0.5426 | 0.5524 | 0.5624 | 0.5726 | 0.5831 | 0.6034 | 0.6176 | 0.6308 | 0.6433 | 0.6530 | 0.6623 | 0.6716 | 0.6809 | 0.6901 | 0.6991 | 0.7075 | 0.7158 | 0.7227 | 0.7299 | 0.7369 | 0.7437 | 0.7505 | 0.7573 | 0.7641 |        |
| 'Astr                        | 0.3632 | 0.3824 | 0.4015 | 0.4189 | 0.4355 | 0.4507 | 0.4588 | 0.4670 | 0.4750 | 0.4833 | 0.4929 | 0.5017 | 0.5112 | 0.5208 | 0.5304 | 0.5413 | 0.5581 | 0.5740 | 0.5885 | 0.6017 | 0.6139 | 0.6259 | 0.6373 | 0.6482 | 0.6591 | 0.6695 | 0.6799 | 0.6892 | 0.6985 | 0.7078 | 0.7171 | 0.7264 | 0.7357 | 0.7450 | 0.7543 | 0.7636 |        |
| Bahau                        | 0.3956 | 0.4101 | 0.4240 | 0.4366 | 0.4486 | 0.4595 | 0.4654 | 0.4714 | 0.4770 | 0.4828 | 0.4889 | 0.4948 | 0.5007 | 0.5067 | 0.5127 | 0.5211 | 0.5298 | 0.5435 | 0.5566 | 0.5683 | 0.5790 | 0.5891 | 0.5977 | 0.6068 | 0.6142 | 0.6227 | 0.6310 | 0.6397 | 0.6480 | 0.6567 | 0.6644 | 0.6729 | 0.6828 | 0.6923 | 0.7011 | 0.7061 |        |
| Eastern Province             | 0.4236 | 0.4407 | 0.4579 | 0.4743 | 0.4901 | 0.5045 | 0.5124 | 0.5207 | 0.5293 | 0.5383 | 0.5486 | 0.5607 | 0.5722 | 0.5841 | 0.5966 | 0.6117 | 0.6264 | 0.6404 | 0.6535 | 0.6699 | 0.6856 | 0.7008 | 0.7154 | 0.7293 | 0.7436 | 0.7574 | 0.7711 | 0.7849 | 0.7986 | 0.8124 | 0.8261 | 0.8398 | 0.8535 | 0.8672 | 0.8809 | 0.8946 |        |
| Har'f                        | 0.4064 | 0.4227 | 0.4388 | 0.4555 | 0.4676 | 0.4806 | 0.4788 | 0.4950 | 0.5022 | 0.5096 | 0.5182 | 0.5266 | 0.5356 | 0.5447 | 0.5541 | 0.5639 | 0.5731 | 0.5938 | 0.6071 | 0.6191 | 0.6304 | 0.6399 | 0.6488 | 0.6577 | 0.6666 | 0.6755 | 0.6844 | 0.6924 | 0.7014 | 0.7103 | 0.7192 | 0.7281 | 0.7370 | 0.7459 | 0.7548 | 0.7637 |        |
| Jawf                         | 0.2993 | 0.3299 | 0.3592 | 0.3855 | 0.4098 | 0.4316 | 0.4526 | 0.4634 | 0.4764 | 0.4893 | 0.5019 | 0.5135 | 0.5248 | 0.5354 | 0.5455 | 0.5572 | 0.5914 | 0.6079 | 0.6248 | 0.6391 | 0.6507 | 0.6607 | 0.6692 | 0.6767 | 0.6842 | 0.6917 | 0.7011 | 0.7135 | 0.7278 | 0.7331 | 0.7409 | 0.7509 | 0.7633 | 0.7769 | 0.7929 |        |        |
| Iran                         | 0.3172 | 0.3220 | 0.3264 | 0.3300 | 0.3339 | 0.3376 | 0.3410 | 0.3443 | 0.3474 | 0.3504 | 0.3533 | 0.3561 | 0.3589 | 0.3617 | 0.3645 | 0.3673 | 0.3701 | 0.3729 | 0.3757 | 0.3785 | 0.3813 | 0.3841 | 0.3869 | 0.3897 | 0.3925 | 0.3953 | 0.3981 | 0.4009 | 0.4037 | 0.4065 | 0.4093 | 0.4121 | 0.4149 | 0.4177 | 0.4205 |        |        |
| Madinah                      | 0.3047 | 0.3317 | 0.3586 | 0.3832 | 0.4062 | 0.4269 | 0.4434 | 0.4637 | 0.4874 | 0.5141 | 0.5427 | 0.5730 | 0.6060 | 0.6419 | 0.6809 | 0.7219 | 0.7669 | 0.8159 | 0.8689 | 0.9259 | 0.9869 | 1.0519 | 1.1209 | 1.1939 | 1.2709 | 1.3519 | 1.4369 | 1.5259 | 1.6189 | 1.7169 | 1.8189 | 1.9259 | 2.0389 | 2.1569 | 2.2809 | 2.4109 |        |
| Makkah                       | 0.4182 | 0.4241 | 0.4300 | 0.4359 | 0.4418 | 0.4477 | 0.4536 | 0.4595 | 0.4654 | 0.4713 | 0.4772 | 0.4831 | 0.4890 | 0.4949 | 0.5008 | 0.5067 | 0.5126 | 0.5185 | 0.5244 | 0.5303 | 0.5362 | 0.5421 | 0.5480 | 0.5539 | 0.5598 | 0.5657 | 0.5716 | 0.5775 | 0.5834 | 0.5893 | 0.5952 | 0.6011 | 0.6070 | 0.6129 | 0.6188 | 0.6247 |        |
| Najran                       | 0.2531 | 0.2835 | 0.3118 | 0.3462 | 0.3581 | 0.3770 | 0.3868 | 0.3968 | 0.4065 | 0.4162 | 0.4271 | 0.4388 | 0.4542 | 0.4547 | 0.4648 | 0.4753 | 0.4938 | 0.5114 | 0.5276 | 0.5422 | 0.5556 | 0.5687 | 0.5844 | 0.5933 | 0.6019 | 0.6106 | 0.6196 | 0.6286 | 0.6376 | 0.6466 | 0.6556 | 0.6646 | 0.6736 | 0.6826 | 0.6916 | 0.7006 |        |
| Northern Borders             | 0.4254 | 0.4270 | 0.4491 | 0.4602 | 0.4724 | 0.4828 | 0.4888 | 0.4968 | 0.4958 | 0.5014 | 0.5083 | 0.5144 | 0.5212 | 0.5301 | 0.5399 | 0.5498 | 0.5588 | 0.5688 | 0.5788 | 0.5888 | 0.5988 | 0.6088 | 0.6188 | 0.6288 | 0.6388 | 0.6488 | 0.6588 | 0.6688 | 0.6788 | 0.6888 | 0.6988 | 0.7088 | 0.7188 | 0.7288 | 0.7388 | 0.7488 |        |
| Qassim                       | 0.3603 | 0.3804 | 0.4016 | 0.4221 | 0.4422 | 0.4613 | 0.4727 | 0.4846 | 0.4963 | 0.5084 | 0.5212 | 0.5320 | 0.5433 | 0.5543 | 0.5656 | 0.5772 | 0.5951 | 0.6121 | 0.6278 | 0.6423 | 0.6558 | 0.6684 | 0.6795 | 0.6883 | 0.6960 | 0.7051 | 0.7130 | 0.7203 | 0.7274 | 0.7349 | 0.7429 | 0.7511 | 0.7601 | 0.7679 | 0.7727 |        |        |
| Riyadh                       | 0.5005 | 0.5099 | 0.5209 | 0.5331 | 0.5457 | 0.5578 | 0.5632 | 0.5723 | 0.5781 | 0.5854 | 0.5938 | 0.5983 | 0.6081 | 0.6162 | 0.6278 | 0.6395 | 0.6521 | 0.6642 | 0.6768 | 0.6895 | 0.7051 | 0.7143 | 0.7235 | 0.7327 | 0.7418 | 0.7509 | 0.7594 | 0.7674 | 0.7744 | 0.7814 | 0.7884 | 0.7954 | 0.8024 | 0.8094 | 0.8164 |        |        |
| Tabuk                        | 0.3509 | 0.3679 | 0.3870 | 0.4065 | 0.4252 | 0.4420 | 0.4479 | 0.4552 | 0.4631 | 0.4717 | 0.4819 |        |        |        |        |        |        |        |        |        |        |        |        |        |        |        |        |        |        |        |        |        |        |        |        |        |        |



Appendix Table 19: Socio-Demographic Index values for all estimated GBD 2015 locations, 1980-2015

| Location            | 1980   | 1981   | 1982   | 1983   | 1984   | 1985   | 1986   | 1987   | 1988   | 1989   | 1990   | 1991   | 1992   | 1993   | 1994   | 1995   | 1996   | 1997   | 1998   | 1999   | 2000   | 2001   | 2002   | 2003   | 2004   | 2005   | 2006   | 2007   | 2008   | 2009   | 2010   | 2011   | 2012   | 2013   | 2014   | 2015   |
|---------------------|--------|--------|--------|--------|--------|--------|--------|--------|--------|--------|--------|--------|--------|--------|--------|--------|--------|--------|--------|--------|--------|--------|--------|--------|--------|--------|--------|--------|--------|--------|--------|--------|--------|--------|--------|--------|
| Mali's Urban, Rural | 0.2509 | 0.2557 | 0.2605 | 0.2657 | 0.2710 | 0.2770 | 0.2833 | 0.2905 | 0.2987 | 0.3088 | 0.3184 | 0.3273 | 0.3376 | 0.3483 | 0.3586 | 0.3699 | 0.3809 | 0.3911 | 0.4008 | 0.4113 | 0.4209 | 0.4306 | 0.4405 | 0.4504 | 0.4607 | 0.4715 | 0.4825 | 0.4938 | 0.5038 | 0.5134 | 0.5233 | 0.5323 | 0.5401 | 0.5472 | 0.5540 | 0.5605 |
| Mali's Urban, Urban | 0.4320 | 0.4367 | 0.4411 | 0.4459 | 0.4505 | 0.4559 | 0.4611 | 0.4674 | 0.4746 | 0.4833 | 0.4919 | 0.4990 | 0.5072 | 0.5157 | 0.5235 | 0.5323 | 0.5406 | 0.5479 | 0.5546 | 0.5622 | 0.5688 | 0.5755 | 0.5823 | 0.5893 | 0.5965 | 0.6035 | 0.6117 | 0.6207 | 0.6319 | 0.6434 | 0.6538 | 0.6640 | 0.6735 | 0.6829 | 0.6928 | 0.7027 |
| Manipur             | 0.2974 | 0.3036 | 0.3091 | 0.3157 | 0.3229 | 0.3307 | 0.3394 | 0.3484 | 0.3586 | 0.3694 | 0.3811 | 0.3938 | 0.4076 | 0.4223 | 0.4380 | 0.4547 | 0.4726 | 0.4918 | 0.5115 | 0.5319 | 0.5530 | 0.5748 | 0.5975 | 0.6209 | 0.6450 | 0.6699 | 0.6955 | 0.7218 | 0.7488 | 0.7764 | 0.8045 | 0.8329 | 0.8608 | 0.8887 | 0.9161 | 0.9429 |
| Manipur, Rural      | 0.2835 | 0.2892 | 0.2942 | 0.3002 | 0.3068 | 0.3130 | 0.3205 | 0.3305 | 0.3401 | 0.3484 | 0.3564 | 0.3643 | 0.3719 | 0.3800 | 0.3872 | 0.3947 | 0.4025 | 0.4105 | 0.4191 | 0.4305 | 0.4399 | 0.4494 | 0.4573 | 0.4646 | 0.4729 | 0.4820 | 0.4930 | 0.5051 | 0.5080 | 0.5156 | 0.5208 | 0.5275 | 0.5341 | 0.5411 | 0.5481 | 0.5545 |
| Manipur, Urban      | 0.3634 | 0.3692 | 0.3742 | 0.3802 | 0.3868 | 0.3925 | 0.3996 | 0.4095 | 0.4182 | 0.4284 | 0.4364 | 0.4444 | 0.4474 | 0.4549 | 0.4627 | 0.4708 | 0.4785 | 0.4853 | 0.4914 | 0.5023 | 0.5119 | 0.5200 | 0.5273 | 0.5343 | 0.5429 | 0.5514 | 0.5587 | 0.5656 | 0.5780 | 0.5850 | 0.5960 | 0.6088 | 0.6174 | 0.6274 | 0.6364 | 0.6456 |
| Mauritius           | 0.2707 | 0.2744 | 0.2776 | 0.2811 | 0.2849 | 0.2890 | 0.2936 | 0.2987 | 0.3043 | 0.3103 | 0.3167 | 0.3234 | 0.3304 | 0.3377 | 0.3452 | 0.3531 | 0.3613 | 0.3698 | 0.3785 | 0.3874 | 0.3965 | 0.4058 | 0.4153 | 0.4250 | 0.4349 | 0.4450 | 0.4553 | 0.4658 | 0.4764 | 0.4871 | 0.4979 | 0.5088 | 0.5197 | 0.5307 | 0.5417 | 0.5527 |
| Mauritius, Rural    | 0.2008 | 0.2036 | 0.2066 | 0.2100 | 0.2142 | 0.2189 | 0.2244 | 0.2309 | 0.2371 | 0.2456 | 0.2542 | 0.2627 | 0.2688 | 0.2766 | 0.2850 | 0.2918 | 0.2994 | 0.3077 | 0.3162 | 0.3253 | 0.3341 | 0.3428 | 0.3533 | 0.3612 | 0.3691 | 0.3771 | 0.3861 | 0.3940 | 0.4005 | 0.4084 | 0.4154 | 0.4224 | 0.4276 | 0.4327 | 0.4387 | 0.4444 |
| Mauritius, Urban    | 0.3849 | 0.3932 | 0.3955 | 0.4003 | 0.4078 | 0.4167 | 0.4242 | 0.4312 | 0.4411 | 0.4507 | 0.4588 | 0.4662 | 0.4742 | 0.4810 | 0.4891 | 0.4966 | 0.5048 | 0.5133 | 0.5223 | 0.5311 | 0.5418 | 0.5495 | 0.5571 | 0.5651 | 0.5736 | 0.5823 | 0.5911 | 0.6000 | 0.6096 | 0.6189 | 0.6289 | 0.6374 | 0.6466 | 0.6566 | 0.6670 | 0.6770 |
| Mexico              | 0.2869 | 0.2902 | 0.2938 | 0.2989 | 0.3072 | 0.3195 | 0.3325 | 0.3479 | 0.3585 | 0.3674 | 0.3746 | 0.3835 | 0.3918 | 0.4007 | 0.4071 | 0.4154 | 0.4258 | 0.4328 | 0.4392 | 0.4466 | 0.4556 | 0.4641 | 0.4723 | 0.4793 | 0.4856 | 0.4914 | 0.4968 | 0.5027 | 0.5088 | 0.5144 | 0.5245 | 0.5316 | 0.5395 | 0.5472 | 0.5557 | 0.5642 |
| Mexico, Rural       | 0.2380 | 0.2405 | 0.2433 | 0.2477 | 0.2553 | 0.2670 | 0.2792 | 0.2939 | 0.3122 | 0.3196 | 0.3274 | 0.3353 | 0.3437 | 0.3498 | 0.3578 | 0.3678 | 0.3746 | 0.3802 | 0.3880 | 0.3967 | 0.4048 | 0.4127 | 0.4192 | 0.4256 | 0.4312 | 0.4360 | 0.4402 | 0.4450 | 0.4503 | 0.4562 | 0.4619 | 0.4650 | 0.4714 | 0.4775 | 0.4846 | 0.4916 |
| Mexico, Urban       | 0.3512 | 0.3548 | 0.3587 | 0.3640 | 0.3724 | 0.3849 | 0.3980 | 0.4137 | 0.4244 | 0.4331 | 0.4401 | 0.4488 | 0.4568 | 0.4653 | 0.4732 | 0.4791 | 0.4891 | 0.4954 | 0.5011 | 0.5080 | 0.5165 | 0.5245 | 0.5325 | 0.5392 | 0.5453 | 0.5511 | 0.5564 | 0.5625 | 0.5686 | 0.5766 | 0.5851 | 0.5927 | 0.6012 | 0.6097 | 0.6193 | 0.6290 |
| Moldova             | 0.3069 | 0.3125 | 0.3196 | 0.3267 | 0.3344 | 0.3416 | 0.3489 | 0.3585 | 0.3687 | 0.3783 | 0.3879 | 0.3965 | 0.4048 | 0.4159 | 0.4257 | 0.4351 | 0.4439 | 0.4527 | 0.4581 | 0.4643 | 0.4714 | 0.4823 | 0.4916 | 0.4994 | 0.5074 | 0.5151 | 0.5222 | 0.5315 | 0.5405 | 0.5493 | 0.5575 | 0.5667 | 0.5750 | 0.5829 | 0.5907 | 0.5987 |
| Moldova, Rural      | 0.2973 | 0.3024 | 0.3092 | 0.3158 | 0.3230 | 0.3298 | 0.3367 | 0.3459 | 0.3556 | 0.3648 | 0.3741 | 0.3824 | 0.3906 | 0.4015 | 0.4113 | 0.4207 | 0.4295 | 0.4383 | 0.4443 | 0.4499 | 0.4588 | 0.4673 | 0.4760 | 0.4830 | 0.4900 | 0.4965 | 0.5022 | 0.5098 | 0.5174 | 0.5244 | 0.5308 | 0.5382 | 0.5466 | 0.5507 | 0.5574 | 0.5644 |
| N.A.gland, Rural    | 0.3805 | 0.3865 | 0.3941 | 0.4014 | 0.4091 | 0.4162 | 0.4234 | 0.4327 | 0.4413 | 0.4491 | 0.4569 | 0.4640 | 0.4708 | 0.4873 | 0.4963 | 0.5054 | 0.5127 | 0.5217 | 0.5303 | 0.5387 | 0.5480 | 0.5570 | 0.5660 | 0.5750 | 0.5830 | 0.5906 | 0.6004 | 0.6104 | 0.6201 | 0.6296 | 0.6396 | 0.6490 | 0.6583 | 0.6682 | 0.6786 | 0.6890 |
| N.A.gland, Urban    | 0.2042 | 0.2086 | 0.2127 | 0.2192 | 0.2242 | 0.2308 | 0.2377 | 0.2453 | 0.2516 | 0.2604 | 0.2668 | 0.2747 | 0.2820 | 0.2899 | 0.2988 | 0.3093 | 0.3170 | 0.3263 | 0.3367 | 0.3480 | 0.3579 | 0.3676 | 0.3763 | 0.3872 | 0.3989 | 0.4095 | 0.4224 | 0.4368 | 0.4493 | 0.4603 | 0.4720 | 0.4819 | 0.4916 | 0.5003 | 0.5088 | 0.5167 |
| Orissa              | 0.1857 | 0.1897 | 0.1934 | 0.1994 | 0.2039 | 0.2100 | 0.2164 | 0.2217 | 0.2292 | 0.2375 | 0.2434 | 0.2509 | 0.2578 | 0.2653 | 0.2738 | 0.2840 | 0.2916 | 0.3007 | 0.3111 | 0.3223 | 0.3329 | 0.3423 | 0.3512 | 0.3623 | 0.3742 | 0.3849 | 0.3978 | 0.4120 | 0.4242 | 0.4348 | 0.4449 | 0.4533 | 0.4646 | 0.4731 | 0.4813 | 0.4889 |
| Orissa, Rural       | 0.3645 | 0.3690 | 0.3731 | 0.3797 | 0.3884 | 0.3908 | 0.3973 | 0.4023 | 0.4098 | 0.4179 | 0.4233 | 0.4302 | 0.4364 | 0.4432 | 0.4510 | 0.4604 | 0.4682 | 0.4748 | 0.4840 | 0.4940 | 0.5027 | 0.5110 | 0.5183 | 0.5279 | 0.5384 | 0.5477 | 0.5595 | 0.5729 | 0.5845 | 0.5947 | 0.6059 | 0.6156 | 0.6255 | 0.6350 | 0.6447 | 0.6542 |
| Orissa, Urban       | 0.3218 | 0.3285 | 0.3355 | 0.3425 | 0.3502 | 0.3584 | 0.3668 | 0.3763 | 0.3861 | 0.3970 | 0.4073 | 0.4175 | 0.4279 | 0.4382 | 0.4481 | 0.4581 | 0.4682 | 0.4779 | 0.4873 | 0.4973 | 0.5075 | 0.5172 | 0.5257 | 0.5341 | 0.5420 | 0.5505 | 0.5592 | 0.5691 | 0.5788 | 0.5886 | 0.5981 | 0.6074 | 0.6160 | 0.6241 | 0.6319 | 0.6397 |
| Punjab              | 0.2883 | 0.2947 | 0.3015 | 0.3083 | 0.3158 | 0.3239 | 0.3322 | 0.3416 | 0.3512 | 0.3621 | 0.3732 | 0.3823 | 0.3926 | 0.4025 | 0.4123 | 0.4221 | 0.4321 | 0.4419 | 0.4515 | 0.4617 | 0.4724 | 0.4826 | 0.4918 | 0.5010 | 0.5096 | 0.5188 | 0.5278 | 0.5379 | 0.5475 | 0.5570 | 0.5660 | 0.5747 | 0.5826 | 0.5909 | 0.5971 | 0.6039 |
| Punjab, Rural       | 0.4152 | 0.4215 | 0.4281 | 0.4345 | 0.4415 | 0.4490 | 0.4566 | 0.4641 | 0.4739 | 0.4830 | 0.4930 | 0.5019 | 0.5109 | 0.5196 | 0.5278 | 0.5361 | 0.5444 | 0.5523 | 0.5599 | 0.5682 | 0.5762 | 0.5846 | 0.5914 | 0.5981 | 0.6044 | 0.6114 | 0.6185 | 0.6271 | 0.6357 | 0.6445 | 0.6533 | 0.6625 | 0.6714 | 0.6804 | 0.6898 | 0.6994 |
| Punjab, Urban       | 0.1817 | 0.1862 | 0.1912 | 0.1981 | 0.2055 | 0.2092 | 0.2156 | 0.2219 | 0.2312 | 0.2400 | 0.2511 | 0.2604 | 0.2703 | 0.2795 | 0.2906 | 0.3014 | 0.3131 | 0.3237 | 0.3337 | 0.3454 | 0.3558 | 0.3669 | 0.3760 | 0.3876 | 0.3995 | 0.4091 | 0.4211 | 0.4333 | 0.4453 | 0.4580 | 0.4693 | 0.4827 | 0.4943 | 0.5046 | 0.5140 | 0.5220 |
| R.A.gland, Rural    | 0.4152 | 0.4188 | 0.4239 | 0.4309 | 0.4386 | 0.4468 | 0.4554 | 0.4644 | 0.4739 | 0.4838 | 0.4941 | 0.5047 | 0.5157 | 0.5269 | 0.5383 | 0.5499 | 0.5617 | 0.5736 | 0.5858 | 0.5983 | 0.6111 | 0.6242 | 0.6376 | 0.6513 | 0.6650 | 0.6790 | 0.6933 | 0.7079 | 0.7228 | 0.7379 | 0.7532 | 0.7688 | 0.7847 | 0.8008 | 0.8170 | 0.8334 |
| R.A.gland, Urban    | 0.3233 | 0.3336 | 0.3395 | 0.3474 | 0.3537 | 0.3620 | 0.3721 | 0.3841 | 0.3984 | 0.4061 | 0.4190 | 0.4252 | 0.4348 | 0.4463 | 0.4575 | 0.4695 | 0.4806 | 0.4928 | 0.5028 | 0.5122 | 0.5237 | 0.5370 | 0.5419 | 0.5511 | 0.5599 | 0.5706 | 0.5804 | 0.5905 | 0.6000 | 0.6124 | 0.6249 | 0.6363 | 0.6469 | 0.6572 | 0.6671 |        |
| Sikkim              | 0.2633 | 0.2674 | 0.2727 | 0.2784 | 0.2866 | 0.2959 | 0.3065 | 0.3169 | 0.3264 | 0.3354 | 0.3440 | 0.3511 | 0.3587 | 0.3654 | 0.3734 | 0.3818 | 0.3908 | 0.4001 | 0.4094 | 0.4184 | 0.4284 | 0.4384 | 0.4487 | 0.4589 | 0.4691 | 0.4792 | 0.4890 | 0.4988 | 0.5091 | 0.5111 | 0.5244 | 0.5367 | 0.5478 | 0.5577 | 0.5673 | 0.5767 |
| Sikkim, Rural       | 0.2537 | 0.2577 | 0.2627 | 0.2681 | 0.2760 | 0.2850 | 0.2953 | 0.3054 | 0.3164 | 0.3273 | 0.3337 | 0.3418 | 0.3488 | 0.3562 | 0.3640 | 0.3699 | 0.3785 | 0.3855 | 0.3944 | 0.4030 | 0.4124 | 0.4218 | 0.4313 | 0.4406 | 0.4499 | 0.4597 | 0.4692 | 0.4786 | 0.4881 | 0.4944 | 0.5045 | 0.5150 | 0.5255 | 0.5349 | 0.5479 | 0.5590 |
| Sikkim, Urban       | 0.3666 | 0.3713 | 0.3771 | 0.3832 | 0.3920 | 0.4020 | 0.4134 | 0.4245 | 0.4345 | 0.4437 | 0.4525 | 0.4596 | 0.4648 | 0.4734 | 0.4813 | 0.4893 | 0.4981 | 0.5072 | 0.5162 | 0.5249 | 0.5346 | 0.5442 | 0.5540 | 0.5636 | 0.5733 | 0.5829 | 0.5921 | 0.6015 | 0.6116 | 0.6248 | 0.6343 | 0.6422 | 0.6504 | 0.6581 | 0.6654 |        |
| Tamil N.A.du        | 0.2800 | 0.2857 | 0.2903 | 0.2957 | 0.3026 | 0.3102 | 0.3187 | 0.3283 | 0.3378 | 0.3483 | 0.3587 | 0.3688 | 0.3794 | 0.3915 | 0.4037 | 0.4172 | 0.4296 | 0.4395 | 0.4525 | 0.4647 | 0      |        |        |        |        |        |        |        |        |        |        |        |        |        |        |        |

Appendix Table 19: Socio-Demographic Index values for all estimated GBD 2015 locations, 1980-2015

| Location     | 1980   | 1981   | 1982   | 1983   | 1984   | 1985   | 1986   | 1987   | 1988   | 1989   | 1990   | 1991   | 1992   | 1993   | 1994   | 1995   | 1996   | 1997   | 1998   | 1999   | 2000   | 2001   | 2002   | 2003   | 2004   | 2005   | 2006   | 2007   | 2008   | 2009   | 2010   | 2011   | 2012   | 2013   | 2014   | 2015   |        |
|--------------|--------|--------|--------|--------|--------|--------|--------|--------|--------|--------|--------|--------|--------|--------|--------|--------|--------|--------|--------|--------|--------|--------|--------|--------|--------|--------|--------|--------|--------|--------|--------|--------|--------|--------|--------|--------|--------|
| Mandera      | 0.1477 | 0.1511 | 0.1543 | 0.1572 | 0.1600 | 0.1628 | 0.1660 | 0.1694 | 0.1732 | 0.1773 | 0.1817 | 0.1857 | 0.1888 | 0.1913 | 0.1936 | 0.1951 | 0.1966 | 0.1978 | 0.1986 | 0.1992 | 0.1998 | 0.2001 | 0.2003 | 0.2005 | 0.2006 | 0.2007 | 0.2008 | 0.2009 | 0.2010 | 0.2011 | 0.2012 | 0.2013 | 0.2014 | 0.2015 |        |        |        |
| Marabot      | 0.1771 | 0.1805 | 0.1839 | 0.1870 | 0.1901 | 0.1932 | 0.1967 | 0.2003 | 0.2041 | 0.2076 | 0.2123 | 0.2166 | 0.2202 | 0.2232 | 0.2261 | 0.2285 | 0.2300 | 0.2309 | 0.2317 | 0.2322 | 0.2328 | 0.2332 | 0.2336 | 0.2339 | 0.2342 | 0.2345 | 0.2347 | 0.2349 | 0.2351 | 0.2352 | 0.2353 | 0.2354 | 0.2355 | 0.2356 | 0.2357 |        |        |
| Meru         | 0.2487 | 0.2574 | 0.2661 | 0.2746 | 0.2834 | 0.2922 | 0.3015 | 0.3111 | 0.3213 | 0.3320 | 0.3430 | 0.3542 | 0.3656 | 0.3772 | 0.3891 | 0.4012 | 0.4133 | 0.4254 | 0.4375 | 0.4496 | 0.4617 | 0.4738 | 0.4859 | 0.4979 | 0.5099 | 0.5219 | 0.5339 | 0.5459 | 0.5579 | 0.5699 | 0.5819 | 0.5939 | 0.6059 | 0.6179 | 0.6299 |        |        |
| Migori       | 0.0898 | 0.0919 | 0.0940 | 0.0961 | 0.0982 | 0.1003 | 0.1024 | 0.1045 | 0.1066 | 0.1087 | 0.1108 | 0.1129 | 0.1150 | 0.1171 | 0.1192 | 0.1213 | 0.1234 | 0.1255 | 0.1276 | 0.1297 | 0.1318 | 0.1339 | 0.1360 | 0.1381 | 0.1402 | 0.1423 | 0.1444 | 0.1465 | 0.1486 | 0.1507 | 0.1528 | 0.1549 | 0.1570 | 0.1591 | 0.1612 | 0.1633 |        |
| Mombasa      | 0.3801 | 0.3875 | 0.3947 | 0.4017 | 0.4086 | 0.4158 | 0.4234 | 0.4314 | 0.4400 | 0.4490 | 0.4589 | 0.4693 | 0.4802 | 0.4916 | 0.5034 | 0.5156 | 0.5281 | 0.5409 | 0.5540 | 0.5674 | 0.5811 | 0.5951 | 0.6093 | 0.6238 | 0.6385 | 0.6534 | 0.6684 | 0.6835 | 0.6987 | 0.7140 | 0.7294 | 0.7448 | 0.7603 | 0.7758 | 0.7913 | 0.8068 |        |
| Morogoro/PTW | 0.6224 | 0.7700 | 0.7783 | 0.7862 | 0.7942 | 0.8026 | 0.8115 | 0.8209 | 0.8302 | 0.8401 | 0.8503 | 0.8608 | 0.8716 | 0.8827 | 0.8941 | 0.9057 | 0.9174 | 0.9293 | 0.9413 | 0.9534 | 0.9655 | 0.9776 | 0.9897 | 1.0018 | 1.0139 | 1.0260 | 1.0381 | 1.0502 | 1.0623 | 1.0744 | 1.0865 | 1.0986 | 1.1107 | 1.1228 | 1.1349 | 1.1470 |        |
| Nairobi      | 0.3902 | 0.4039 | 0.4185 | 0.4229 | 0.4472 | 0.4615 | 0.4759 | 0.4905 | 0.5050 | 0.5193 | 0.5332 | 0.5473 | 0.5618 | 0.5765 | 0.5913 | 0.6063 | 0.6214 | 0.6366 | 0.6519 | 0.6673 | 0.6828 | 0.6983 | 0.7139 | 0.7295 | 0.7451 | 0.7607 | 0.7763 | 0.7919 | 0.8075 | 0.8231 | 0.8387 | 0.8543 | 0.8700 | 0.8856 | 0.9012 | 0.9168 |        |
| Nakuru       | 0.2941 | 0.3035 | 0.3129 | 0.3223 | 0.3319 | 0.3418 | 0.3521 | 0.3629 | 0.3741 | 0.3851 | 0.3964 | 0.4072 | 0.4171 | 0.4261 | 0.4344 | 0.4421 | 0.4494 | 0.4562 | 0.4625 | 0.4683 | 0.4736 | 0.4784 | 0.4827 | 0.4870 | 0.4908 | 0.4941 | 0.4969 | 0.5000 | 0.5034 | 0.5071 | 0.5110 | 0.5150 | 0.5191 | 0.5232 | 0.5273 | 0.5314 |        |
| Nandi        | 0.1991 | 0.2076 | 0.2159 | 0.2242 | 0.2326 | 0.2415 | 0.2509 | 0.2609 | 0.2716 | 0.2825 | 0.2938 | 0.3047 | 0.3159 | 0.3271 | 0.3384 | 0.3498 | 0.3614 | 0.3731 | 0.3848 | 0.3966 | 0.4084 | 0.4202 | 0.4320 | 0.4438 | 0.4556 | 0.4674 | 0.4792 | 0.4910 | 0.5028 | 0.5146 | 0.5264 | 0.5382 | 0.5500 | 0.5618 | 0.5736 | 0.5854 |        |
| Nasik        | 0.1503 | 0.1587 | 0.1671 | 0.1753 | 0.1834 | 0.1919 | 0.2007 | 0.2100 | 0.2197 | 0.2294 | 0.2394 | 0.2494 | 0.2594 | 0.2694 | 0.2794 | 0.2894 | 0.2994 | 0.3094 | 0.3194 | 0.3294 | 0.3394 | 0.3494 | 0.3594 | 0.3694 | 0.3794 | 0.3894 | 0.3994 | 0.4094 | 0.4194 | 0.4294 | 0.4394 | 0.4494 | 0.4594 | 0.4694 | 0.4794 | 0.4894 |        |
| Nyamira      | 0.2612 | 0.2695 | 0.2773 | 0.2852 | 0.2930 | 0.3012 | 0.3099 | 0.3191 | 0.3284 | 0.3377 | 0.3476 | 0.3581 | 0.3683 | 0.3785 | 0.3887 | 0.3989 | 0.4091 | 0.4193 | 0.4295 | 0.4397 | 0.4499 | 0.4601 | 0.4703 | 0.4805 | 0.4907 | 0.5009 | 0.5111 | 0.5213 | 0.5315 | 0.5417 | 0.5519 | 0.5621 | 0.5723 | 0.5825 | 0.5927 | 0.6029 |        |
| Nyandarua    | 0.2608 | 0.2693 | 0.2782 | 0.2868 | 0.2955 | 0.3046 | 0.3141 | 0.3241 | 0.3340 | 0.3439 | 0.3538 | 0.3637 | 0.3736 | 0.3835 | 0.3934 | 0.4033 | 0.4132 | 0.4231 | 0.4330 | 0.4429 | 0.4528 | 0.4627 | 0.4726 | 0.4825 | 0.4924 | 0.5023 | 0.5122 | 0.5221 | 0.5320 | 0.5419 | 0.5518 | 0.5617 | 0.5716 | 0.5815 | 0.5914 | 0.6013 |        |
| Nyeri        | 0.2890 | 0.3000 | 0.3110 | 0.3219 | 0.3327 | 0.3437 | 0.3551 | 0.3668 | 0.3794 | 0.3930 | 0.4065 | 0.4191 | 0.4303 | 0.4401 | 0.4493 | 0.4573 | 0.4655 | 0.4730 | 0.4770 | 0.4805 | 0.4839 | 0.4873 | 0.4910 | 0.4951 | 0.4992 | 0.5033 | 0.5074 | 0.5115 | 0.5156 | 0.5197 | 0.5238 | 0.5279 | 0.5320 | 0.5361 | 0.5402 | 0.5443 | 0.5484 |
| Samburu      | 0.1781 | 0.1842 | 0.1902 | 0.1961 | 0.2020 | 0.2081 | 0.2146 | 0.2213 | 0.2281 | 0.2341 | 0.2400 | 0.2455 | 0.2503 | 0.2544 | 0.2584 | 0.2626 | 0.2672 | 0.2722 | 0.2772 | 0.2822 | 0.2872 | 0.2922 | 0.2972 | 0.3022 | 0.3072 | 0.3122 | 0.3172 | 0.3222 | 0.3272 | 0.3322 | 0.3372 | 0.3422 | 0.3472 | 0.3522 | 0.3572 | 0.3622 |        |
| Siaya        | 0.2090 | 0.2156 | 0.2223 | 0.2288 | 0.2353 | 0.2424 | 0.2499 | 0.2580 | 0.2669 | 0.2761 | 0.2861 | 0.2954 | 0.3036 | 0.3110 | 0.3177 | 0.3233 | 0.3279 | 0.3320 | 0.3358 | 0.3391 | 0.3424 | 0.3456 | 0.3488 | 0.3516 | 0.3545 | 0.3573 | 0.3601 | 0.3629 | 0.3657 | 0.3685 | 0.3713 | 0.3741 | 0.3769 | 0.3797 | 0.3825 | 0.3853 |        |
| TaitaTaveta  | 0.2894 | 0.2979 | 0.3064 | 0.3148 | 0.3232 | 0.3320 | 0.3413 | 0.3510 | 0.3615 | 0.3722 | 0.3834 | 0.3939 | 0.4035 | 0.4123 | 0.4207 | 0.4280 | 0.4343 | 0.4375 | 0.4412 | 0.4448 | 0.4483 | 0.4518 | 0.4559 | 0.4607 | 0.4662 | 0.4725 | 0.4789 | 0.4852 | 0.4915 | 0.4978 | 0.5041 | 0.5104 | 0.5167 | 0.5230 | 0.5293 | 0.5356 |        |
| TanaRiver    | 0.1967 | 0.2025 | 0.2085 | 0.2143 | 0.2202 | 0.2265 | 0.2332 | 0.2403 | 0.2478 | 0.2551 | 0.2631 | 0.2705 | 0.2771 | 0.2830 | 0.2883 | 0.2926 | 0.2962 | 0.2991 | 0.2984 | 0.2970 | 0.2945 | 0.2927 | 0.2926 | 0.2933 | 0.2945 | 0.2961 | 0.2984 | 0.3009 | 0.3044 | 0.3087 | 0.3135 | 0.3184 | 0.3235 | 0.3287 | 0.3348 | 0.3409 |        |
| TharakaNithi | 0.3002 | 0.3063 | 0.3123 | 0.3182 | 0.3242 | 0.3304 | 0.3371 | 0.3442 | 0.3518 | 0.3592 | 0.3676 | 0.3760 | 0.3852 | 0.3951 | 0.4044 | 0.4073 | 0.4104 | 0.4121 | 0.4135 | 0.4148 | 0.4168 | 0.4202 | 0.4248 | 0.4301 | 0.4361 | 0.4431 | 0.4494 | 0.4548 | 0.4606 | 0.4669 | 0.4732 | 0.4797 | 0.4862 | 0.4930 | 0.4999 | 0.5070 |        |
| TransNzoia   | 0.2135 | 0.2225 | 0.2314 | 0.2401 | 0.2490 | 0.2584 | 0.2681 | 0.2786 | 0.2900 | 0.3022 | 0.3149 | 0.3266 | 0.3369 | 0.3459 | 0.3540 | 0.3608 | 0.3653 | 0.3685 | 0.3711 | 0.3737 | 0.3760 | 0.3779 | 0.3799 | 0.3822 | 0.3853 | 0.3894 | 0.3945 | 0.3997 | 0.4051 | 0.4115 | 0.4181 | 0.4248 | 0.4318 | 0.4387 | 0.4459 | 0.4534 |        |
| Turkana      | 0.0625 | 0.0644 | 0.0663 | 0.0678 | 0.0691 | 0.0703 | 0.0715 | 0.0726 | 0.0735 | 0.0743 | 0.0750 | 0.0756 | 0.0761 | 0.0765 | 0.0769 | 0.0772 | 0.0774 | 0.0775 | 0.0775 | 0.0775 | 0.0774 | 0.0772 | 0.0769 | 0.0765 | 0.0761 | 0.0756 | 0.0751 | 0.0746 | 0.0741 | 0.0736 | 0.0731 | 0.0726 | 0.0721 | 0.0716 | 0.0711 | 0.0706 |        |
| UasinGishu   | 0.2419 | 0.2510 | 0.2603 | 0.2695 | 0.2787 | 0.2884 | 0.2984 | 0.3089 | 0.3200 | 0.3311 | 0.3424 | 0.3530 | 0.3626 | 0.3711 | 0.3788 | 0.3852 | 0.3894 | 0.3931 | 0.3974 | 0.4021 | 0.4074 | 0.4127 | 0.4189 | 0.4251 | 0.4313 | 0.4375 | 0.4437 | 0.4500 | 0.4562 | 0.4624 | 0.4686 | 0.4748 | 0.4810 | 0.4872 | 0.4934 | 0.4996 |        |
| Vihiga       | 0.2198 | 0.2281 | 0.2363 | 0.2444 | 0.2525 | 0.2610 | 0.2698 | 0.2792 | 0.2889 | 0.2989 | 0.3093 | 0.3171 | 0.3233 | 0.3278 | 0.3318 | 0.3352 | 0.3381 | 0.3405 | 0.3424 | 0.3439 | 0.3450 | 0.3458 | 0.3464 | 0.3468 | 0.3471 | 0.3473 | 0.3474 | 0.3474 | 0.3473 | 0.3471 | 0.3468 | 0.3464 | 0.3459 | 0.3454 | 0.3449 | 0.3444 |        |
| Wajira       | 0.1239 | 0.1256 | 0.1280 | 0.1302 | 0.1322 | 0.1343 | 0.1368 | 0.1393 | 0.1423 | 0.1456 | 0.1494 | 0.1535 | 0.1581 | 0.1631 | 0.1685 | 0.1743 | 0.1804 | 0.1868 | 0.1934 | 0.2002 | 0.2071 | 0.2141 | 0.2211 | 0.2281 | 0.2351 | 0.2421 | 0.2491 | 0.2561 | 0.2631 | 0.2701 | 0.2771 | 0.2841 | 0.2911 | 0.2981 | 0.3051 | 0.3121 |        |
| WestKot      | 0.1638 | 0.1694 | 0.1750 | 0.1806 | 0.1861 | 0.1920 | 0.1981 | 0.2047 | 0.2118 | 0.2191 | 0.2269 | 0.2342 | 0.2400 | 0.2450 | 0.2492 | 0.2523 | 0.2549 | 0.2569 | 0.2584 | 0.2596 | 0.2604 | 0.2610 | 0.2615 | 0.2619 | 0.2623 | 0.2626 | 0.2628 | 0.2629 | 0.2630 | 0.2630 | 0.2629 | 0.2628 | 0.2627 | 0.2626 | 0.2625 | 0.2624 |        |
| Madagascar   | 0.2353 | 0.2402 | 0.2451 | 0.2501 | 0.2552 | 0.2604 | 0.2656 | 0.2708 | 0.2761 | 0.2814 | 0.2867 | 0.2920 | 0.2973 | 0.3026 | 0.3079 | 0.3132 | 0.3185 | 0.3238 | 0.3291 | 0.3344 | 0.3397 | 0.3450 | 0.3503 | 0.3556 | 0.3609 | 0.3662 | 0.3715 | 0.3768 | 0.3821 | 0.3874 | 0.3927 | 0.3980 | 0.4033 | 0.4086 | 0.4139 | 0.4192 | 0.4245 |
| Malawi       | 0.1568 | 0.1564 | 0.1554 | 0.1547 | 0.1537 | 0.1524 | 0.1509 | 0.1494 | 0.1473 | 0.1459 | 0.1435 | 0.1415 | 0.1398 | 0.1384 | 0.1371 | 0.1358 | 0.1346 | 0.1334 | 0.1322 | 0.1310 | 0.1300 | 0.1292 | 0.1285 | 0.1278 | 0.1271 | 0.1264 | 0.1257 | 0.1250 | 0.1243 | 0.1236 | 0.1229 | 0.1222 | 0.1215 | 0.1208 | 0.1201 | 0.1194 |        |
| Mozambique   | 0.0886 | 0.0901 | 0.0901 | 0.0904 | 0.0909 | 0.0917 | 0.0927 | 0.0941 | 0.0961 | 0.0984 | 0.1014 | 0.1052 | 0.1098 | 0.1143 | 0.1187 | 0.1230 | 0.1271 | 0.1311 | 0.1350 | 0.1388 | 0.1425 | 0.1462 | 0.1500 | 0.1537 | 0.1574 | 0.1611 | 0.1648 | 0.1685 | 0.1722 | 0.1759 | 0.1796 | 0.1833 | 0.1870 | 0.1907 | 0.1944 | 0.1981 | 0.2018 |
| Rwanda       | 0.1339 | 0.1359 | 0.1368 | 0.1378 | 0.1425 | 0.1489 | 0.1600 | 0.1731 | 0.1858 | 0.1964 | 0.2058 | 0.2083 | 0.2110 | 0.2127 | 0.2093 | 0.2112 | 0.2144 | 0.2210 | 0.2273 | 0.2337 | 0.2391 | 0.2451 | 0.2509 | 0.2563 | 0.2614 | 0.2662 | 0.2709 | 0.2756 | 0.2803 | 0.2850 | 0.2897 | 0.2944 | 0.2991 | 0.3038 | 0.3085 | 0.3132 | 0.3179 |
| Somalia      | 0.1098 | 0.1101 | 0.1094 | 0.1090 | 0.1082 | 0.1050 | 0.1056 | 0.1080 | 0.1108 | 0.1137 | 0.1158 | 0.1177 | 0.1195 | 0.1208 | 0.1216 | 0.1223 | 0.1231 | 0.1237 | 0.1244 | 0.1251 | 0.1258 | 0.1265 | 0.1272 | 0.1279 | 0.1286 | 0.1293 | 0.1300 | 0.1307 | 0.1314 | 0.1321 | 0.1328 | 0.1335 | 0.1342 | 0.1349 | 0.1356 | 0.1363 |        |
| Tanzania     | 0.1117 | 0.1119 | 0.1123 |        |        |        |        |        |        |        |        |        |        |        |        |        |        |        |        |        |        |        |        |        |        |        |        |        |        |        |        |        |        |        |        |        |        |

**Appendix Table 20: GBD 2015 geography hierarchy with levels**

|                                                  | Level |
|--------------------------------------------------|-------|
| Global                                           | 0     |
| Southeast Asia, East Asia, and Oceania           | 1     |
| East Asia                                        | 2     |
| China                                            | 3     |
| North Korea                                      | 3     |
| Taiwan                                           | 3     |
| Southeast Asia                                   | 2     |
| Cambodia                                         | 3     |
| Indonesia                                        | 3     |
| Laos                                             | 3     |
| Malaysia                                         | 3     |
| Maldives                                         | 3     |
| Myanmar                                          | 3     |
| Philippines                                      | 3     |
| Sri Lanka                                        | 3     |
| Thailand                                         | 3     |
| Timor-Leste                                      | 3     |
| Vietnam                                          | 3     |
| Oceania                                          | 2     |
| Fiji                                             | 3     |
| Kiribati                                         | 3     |
| Marshall Islands                                 | 3     |
| Federated States of Micronesia                   | 3     |
| Papua New Guinea                                 | 3     |
| Samoa                                            | 3     |
| Solomon Islands                                  | 3     |
| Tonga                                            | 3     |
| Vanuatu                                          | 3     |
| Central Europe, Eastern Europe, and Central Asia | 1     |
| Central Asia                                     | 2     |
| Armenia                                          | 3     |
| Azerbaijan                                       | 3     |
| Georgia                                          | 3     |
| Kazakhstan                                       | 3     |
| Kyrgyzstan                                       | 3     |
| Mongolia                                         | 3     |
| Tajikistan                                       | 3     |
| Turkmenistan                                     | 3     |
| Uzbekistan                                       | 3     |
| Central Europe                                   | 2     |
| Albania                                          | 3     |
| Bosnia and Herzegovina                           | 3     |
| Bulgaria                                         | 3     |
| Croatia                                          | 3     |
| Czech Republic                                   | 3     |

**Appendix Table 20: GBD 2015 geography hierarchy with levels**

|                          | Level |
|--------------------------|-------|
| Hungary                  | 3     |
| Macedonia                | 3     |
| Montenegro               | 3     |
| Poland                   | 3     |
| Romania                  | 3     |
| Serbia                   | 3     |
| Slovakia                 | 3     |
| Slovenia                 | 3     |
| Eastern Europe           | 2     |
| Belarus                  | 3     |
| Estonia                  | 3     |
| Latvia                   | 3     |
| Lithuania                | 3     |
| Moldova                  | 3     |
| Russia                   | 3     |
| Ukraine                  | 3     |
| High-income              | 1     |
| High-income Asia Pacific | 2     |
| Brunei                   | 3     |
| Japan                    | 3     |
| South Korea              | 3     |
| Singapore                | 3     |
| Australasia              | 2     |
| Australia                | 3     |
| New Zealand              | 3     |
| Western Europe           | 2     |
| Andorra                  | 3     |
| Austria                  | 3     |
| Belgium                  | 3     |
| Cyprus                   | 3     |
| Denmark                  | 3     |
| Finland                  | 3     |
| France                   | 3     |
| Germany                  | 3     |
| Greece                   | 3     |
| Iceland                  | 3     |
| Ireland                  | 3     |
| Israel                   | 3     |
| Italy                    | 3     |
| Luxembourg               | 3     |
| Malta                    | 3     |
| Netherlands              | 3     |
| Norway                   | 3     |
| Portugal                 | 3     |
| Spain                    | 3     |

**Appendix Table 20: GBD 2015 geography hierarchy with levels**

|                                  | Level |
|----------------------------------|-------|
| Sweden                           | 3     |
| Switzerland                      | 3     |
| United Kingdom                   | 3     |
| Southern Latin America           | 2     |
| Argentina                        | 3     |
| Chile                            | 3     |
| Uruguay                          | 3     |
| High-income North America        | 2     |
| Canada                           | 3     |
| United States                    | 3     |
| Latin America and Caribbean      | 1     |
| Caribbean                        | 2     |
| Antigua and Barbuda              | 3     |
| The Bahamas                      | 3     |
| Barbados                         | 3     |
| Belize                           | 3     |
| Cuba                             | 3     |
| Dominica                         | 3     |
| Dominican Republic               | 3     |
| Grenada                          | 3     |
| Guyana                           | 3     |
| Haiti                            | 3     |
| Jamaica                          | 3     |
| Saint Lucia                      | 3     |
| Saint Vincent and the Grenadines | 3     |
| Suriname                         | 3     |
| Trinidad and Tobago              | 3     |
| Andean Latin America             | 2     |
| Bolivia                          | 3     |
| Ecuador                          | 3     |
| Peru                             | 3     |
| Central Latin America            | 2     |
| Colombia                         | 3     |
| Costa Rica                       | 3     |
| El Salvador                      | 3     |
| Guatemala                        | 3     |
| Honduras                         | 3     |
| Mexico                           | 3     |
| Nicaragua                        | 3     |
| Panama                           | 3     |
| Venezuela                        | 3     |
| Tropical Latin America           | 2     |
| Brazil                           | 3     |
| Paraguay                         | 3     |
| North Africa and Middle East     | 1     |

**Appendix Table 20: GBD 2015 geography hierarchy with levels**

|                                  | Level |
|----------------------------------|-------|
| North Africa and Middle East     | 2     |
| Algeria                          | 3     |
| Bahrain                          | 3     |
| Egypt                            | 3     |
| Iran                             | 3     |
| Iraq                             | 3     |
| Jordan                           | 3     |
| Kuwait                           | 3     |
| Lebanon                          | 3     |
| Libya                            | 3     |
| Morocco                          | 3     |
| Palestine                        | 3     |
| Oman                             | 3     |
| Qatar                            | 3     |
| Saudi Arabia                     | 3     |
| Syria                            | 3     |
| Tunisia                          | 3     |
| Turkey                           | 3     |
| United Arab Emirates             | 3     |
| Yemen                            | 3     |
| South Asia                       | 1     |
| South Asia                       | 2     |
| Afghanistan                      | 3     |
| Bangladesh                       | 3     |
| Bhutan                           | 3     |
| India                            | 3     |
| Nepal                            | 3     |
| Pakistan                         | 3     |
| Sub-Saharan Africa               | 1     |
| Central Sub-Saharan Africa       | 2     |
| Angola                           | 3     |
| Central African Republic         | 3     |
| Congo                            | 3     |
| Democratic Republic of the Congo | 3     |
| Equatorial Guinea                | 3     |
| Gabon                            | 3     |
| Eastern Sub-Saharan Africa       | 2     |
| Burundi                          | 3     |
| Comoros                          | 3     |
| Djibouti                         | 3     |
| Eritrea                          | 3     |
| Ethiopia                         | 3     |
| Kenya                            | 3     |
| Madagascar                       | 3     |
| Malawi                           | 3     |

**Appendix Table 20: GBD 2015 geography hierarchy with levels**

|                                                  | Level |
|--------------------------------------------------|-------|
| Mauritius                                        | 3     |
| Mozambique                                       | 3     |
| Rwanda                                           | 3     |
| Seychelles                                       | 3     |
| Somalia                                          | 3     |
| Tanzania                                         | 3     |
| Uganda                                           | 3     |
| Zambia                                           | 3     |
| Southern Sub-Saharan Africa                      | 2     |
| Botswana                                         | 3     |
| Lesotho                                          | 3     |
| Namibia                                          | 3     |
| South Africa                                     | 3     |
| Swaziland                                        | 3     |
| Zimbabwe                                         | 3     |
| Western Sub-Saharan Africa                       | 2     |
| Benin                                            | 3     |
| Burkina Faso                                     | 3     |
| Cameroon                                         | 3     |
| Cape Verde                                       | 3     |
| Chad                                             | 3     |
| Cote d'Ivoire                                    | 3     |
| The Gambia                                       | 3     |
| Ghana                                            | 3     |
| Guinea                                           | 3     |
| Guinea-Bissau                                    | 3     |
| Liberia                                          | 3     |
| Mali                                             | 3     |
| Mauritania                                       | 3     |
| Niger                                            | 3     |
| Nigeria                                          | 3     |
| Sao Tome and Principe                            | 3     |
| Senegal                                          | 3     |
| Sierra Leone                                     | 3     |
| Togo                                             | 3     |
| American Samoa                                   | 3     |
| Bermuda                                          | 3     |
| Greenland                                        | 3     |
| Guam                                             | 3     |
| Hong Kong Special Administrative Region of China | 4     |
| Macao Special Administrative Region of China     | 4     |
| Northern Mariana Islands                         | 3     |
| Puerto Rico                                      | 3     |
| Virgin Islands, U.S.                             | 3     |
| Northern Ireland                                 | 4     |

**Appendix Table 20: GBD 2015 geography hierarchy with levels**

|                | Level |
|----------------|-------|
| Scotland       | 4     |
| South Sudan    | 3     |
| Eastern Cape   | 4     |
| Free State     | 4     |
| Gauteng        | 4     |
| KwaZulu-Natal  | 4     |
| Limpopo        | 4     |
| Mpumalanga     | 4     |
| North-West     | 4     |
| Northern Cape  | 4     |
| Western Cape   | 4     |
| Anhui          | 5     |
| Beijing        | 5     |
| Chongqing      | 5     |
| Fujian         | 5     |
| Gansu          | 5     |
| Guangdong      | 5     |
| Guangxi        | 5     |
| Guizhou        | 5     |
| Hainan         | 5     |
| Hebei          | 5     |
| Heilongjiang   | 5     |
| Henan          | 5     |
| Hubei          | 5     |
| Hunan          | 5     |
| Inner Mongolia | 5     |
| Jiangsu        | 5     |
| Jiangxi        | 5     |
| Jilin          | 5     |
| Liaoning       | 5     |
| Ningxia        | 5     |
| Qinghai        | 5     |
| Shaanxi        | 5     |
| Shandong       | 5     |
| Shanghai       | 5     |
| Shanxi         | 5     |
| Sichuan        | 5     |
| Tianjin        | 5     |
| Tibet          | 5     |
| Xinjiang       | 5     |
| Yunnan         | 5     |
| Zhejiang       | 5     |
| Sudan          | 3     |
| Alabama        | 4     |
| Alaska         | 4     |



**Appendix Table 20: GBD 2015 geography hierarchy with levels**

|                      | Level |
|----------------------|-------|
| Arizona              | 4     |
| Arkansas             | 4     |
| California           | 4     |
| Colorado             | 4     |
| Connecticut          | 4     |
| Delaware             | 4     |
| District of Columbia | 4     |
| Florida              | 4     |
| Georgia              | 4     |
| Hawaii               | 4     |
| Idaho                | 4     |
| Illinois             | 4     |
| Indiana              | 4     |
| Iowa                 | 4     |
| Kansas               | 4     |
| Kentucky             | 4     |
| Louisiana            | 4     |
| Maine                | 4     |
| Maryland             | 4     |
| Massachusetts        | 4     |
| Michigan             | 4     |
| Minnesota            | 4     |
| Mississippi          | 4     |
| Missouri             | 4     |
| Montana              | 4     |
| Nebraska             | 4     |
| Nevada               | 4     |
| New Hampshire        | 4     |
| New Jersey           | 4     |
| New Mexico           | 4     |
| New York             | 4     |
| North Carolina       | 4     |
| North Dakota         | 4     |
| Ohio                 | 4     |
| Oklahoma             | 4     |
| Oregon               | 4     |
| Pennsylvania         | 4     |
| Rhode Island         | 4     |
| South Carolina       | 4     |
| South Dakota         | 4     |
| Tennessee            | 4     |
| Texas                | 4     |
| Utah                 | 4     |
| Vermont              | 4     |
| Virginia             | 4     |

**Appendix Table 20: GBD 2015 geography hierarchy with levels**

|                                 | Level |
|---------------------------------|-------|
| Washington                      | 4     |
| West Virginia                   | 4     |
| Wisconsin                       | 4     |
| Wyoming                         | 4     |
| North East England              | 5     |
| North West England              | 5     |
| Yorkshire and the Humber        | 5     |
| East Midlands                   | 5     |
| West Midlands                   | 5     |
| East of England                 | 5     |
| Greater London                  | 5     |
| South East England              | 5     |
| South West England              | 5     |
| Wales                           | 4     |
| Aguascalientes                  | 4     |
| Baja California                 | 4     |
| Baja California Sur             | 4     |
| Campeche                        | 4     |
| Coahuila                        | 4     |
| Colima                          | 4     |
| Chiapas                         | 4     |
| Chihuahua                       | 4     |
| Distrito Federal                | 4     |
| Durango                         | 4     |
| Guanajuato                      | 4     |
| Guerrero                        | 4     |
| Hidalgo                         | 4     |
| Jalisco                         | 4     |
| Mexico                          | 4     |
| Michoacan de Ocampo             | 4     |
| Morelos                         | 4     |
| Nayarit                         | 4     |
| Nuevo Leon                      | 4     |
| Oaxaca                          | 4     |
| Puebla                          | 4     |
| Queretaro                       | 4     |
| Quintana Roo                    | 4     |
| San Luis Potosi                 | 4     |
| Sinaloa                         | 4     |
| Sonora                          | 4     |
| Tabasco                         | 4     |
| Tamaulipas                      | 4     |
| Tlaxcala                        | 4     |
| Veracruz de Ignacio de la Llave | 4     |
| Yucatan                         | 4     |

**Appendix Table 20: GBD 2015 geography hierarchy with levels**

|                     | Level |
|---------------------|-------|
| Zacatecas           | 4     |
| England             | 4     |
| Acre                | 4     |
| Alagoas             | 4     |
| Amazonas            | 4     |
| Amapa               | 4     |
| Bahia               | 4     |
| Ceara               | 4     |
| Distrito Federal    | 4     |
| Espirito Santo      | 4     |
| Goiias              | 4     |
| Maranhao            | 4     |
| Minas Gerais        | 4     |
| Mato Grosso do Sul  | 4     |
| Mato Grosso         | 4     |
| Para                | 4     |
| Paraiba             | 4     |
| Parana              | 4     |
| Pernambuco          | 4     |
| Piaui               | 4     |
| Rio de Janeiro      | 4     |
| Rio Grande do Norte | 4     |
| Rondonia            | 4     |
| Roraima             | 4     |
| Rio Grande do Sul   | 4     |
| Santa Catarina      | 4     |
| Sergipe             | 4     |
| Sao Paulo           | 4     |
| Tocantins           | 4     |
| Andhra Pradesh      | 4     |
| Arunachal Pradesh   | 4     |
| Assam               | 4     |
| Bihar               | 4     |
| Chhattisgarh        | 4     |
| Delhi               | 4     |
| Goa                 | 4     |
| Gujarat             | 4     |
| Haryana             | 4     |
| Himachal Pradesh    | 4     |
| Jammu and Kashmir   | 4     |
| Jharkhand           | 4     |
| Karnataka           | 4     |
| Kerala              | 4     |
| Madhya Pradesh      | 4     |
| Maharashtra         | 4     |

**Appendix Table 20: GBD 2015 geography hierarchy with levels**

|                         | Level |
|-------------------------|-------|
| Manipur                 | 4     |
| Meghalaya               | 4     |
| Mizoram                 | 4     |
| Nagaland                | 4     |
| Orissa                  | 4     |
| Punjab                  | 4     |
| Rajasthan               | 4     |
| Sikkim                  | 4     |
| Tamil Nadu              | 4     |
| Telangana               | 4     |
| Tripura                 | 4     |
| Uttar Pradesh           | 4     |
| Uttarakhand             | 4     |
| West Bengal             | 4     |
| Sweden except Stockholm | 4     |
| Stockholm               | 4     |
| Hokkaido                | 4     |
| Aomori                  | 4     |
| Iwate                   | 4     |
| Miyagi                  | 4     |
| Akita                   | 4     |
| Yamagata                | 4     |
| Fukushima               | 4     |
| Ibaraki                 | 4     |
| Tochigi                 | 4     |
| Gunma                   | 4     |
| Saitama                 | 4     |
| Chiba                   | 4     |
| Tokyo                   | 4     |
| Kanagawa                | 4     |
| Niigata                 | 4     |
| Toyama                  | 4     |
| Ishikawa                | 4     |
| Fukui                   | 4     |
| Yamanashi               | 4     |
| Nagano                  | 4     |
| Gifu                    | 4     |
| Shizuoka                | 4     |
| Aichi                   | 4     |
| Mie                     | 4     |
| Shiga                   | 4     |
| Kyoto                   | 4     |
| Osaka                   | 4     |
| Hyogo                   | 4     |
| Nara                    | 4     |

**Appendix Table 20: GBD 2015 geography hierarchy with levels**

|                 | Level |
|-----------------|-------|
| Wakayama        | 4     |
| Tottori         | 4     |
| Shimane         | 4     |
| Okayama         | 4     |
| Hiroshima       | 4     |
| Yamaguchi       | 4     |
| Tokushima       | 4     |
| Kagawa          | 4     |
| Ehime           | 4     |
| Kochi           | 4     |
| Fukuoka         | 4     |
| Saga            | 4     |
| Nagasaki        | 4     |
| Kumamoto        | 4     |
| Oita            | 4     |
| Miyazaki        | 4     |
| Kagoshima       | 4     |
| Okinawa         | 4     |
| Baringo         | 4     |
| Bomet           | 4     |
| Bungoma         | 4     |
| Busia           | 4     |
| Elgeyo-Marakwet | 4     |
| Embu            | 4     |
| Garissa         | 4     |
| HomaBay         | 4     |
| Isiolo          | 4     |
| Kajiado         | 4     |
| Kakamega        | 4     |
| Kericho         | 4     |
| Kiambu          | 4     |
| Kilifi          | 4     |
| Kirinyaga       | 4     |
| Kisii           | 4     |
| Kisumu          | 4     |
| Kitui           | 4     |
| Kwale           | 4     |
| Laikipia        | 4     |
| Lamu            | 4     |
| Machakos        | 4     |
| Makueni         | 4     |
| Mandera         | 4     |
| Marsabit        | 4     |
| Meru            | 4     |
| Migori          | 4     |

**Appendix Table 20: GBD 2015 geography hierarchy with levels**

|                          | Level |
|--------------------------|-------|
| Mombasa                  | 4     |
| Murang'a                 | 4     |
| Nairobi                  | 4     |
| Nakuru                   | 4     |
| Nandi                    | 4     |
| Narok                    | 4     |
| Nyamira                  | 4     |
| Nyandarua                | 4     |
| Nyeri                    | 4     |
| Samburu                  | 4     |
| Siaya                    | 4     |
| TaitaTaveta              | 4     |
| TanaRiver                | 4     |
| TharakaNithi             | 4     |
| TransNzoia               | 4     |
| Turkana                  | 4     |
| UasinGishu               | 4     |
| Vihiga                   | 4     |
| Wajir                    | 4     |
| WestPokot                | 4     |
| Andhra Pradesh, Urban    | 5     |
| Arunachal Pradesh, Urban | 5     |
| Assam, Urban             | 5     |
| Bihar, Urban             | 5     |
| Chhattisgarh, Urban      | 5     |
| Delhi, Urban             | 5     |
| Goa, Urban               | 5     |
| Gujarat, Urban           | 5     |
| Haryana, Urban           | 5     |
| Himachal Pradesh, Urban  | 5     |
| Jammu and Kashmir, Urban | 5     |
| Jharkhand, Urban         | 5     |
| Karnataka, Urban         | 5     |
| Kerala, Urban            | 5     |
| Madhya Pradesh, Urban    | 5     |
| Maharashtra, Urban       | 5     |
| Manipur, Urban           | 5     |
| Meghalaya, Urban         | 5     |
| Mizoram, Urban           | 5     |
| Nagaland, Urban          | 5     |
| Orissa, Urban            | 5     |
| Punjab, Urban            | 5     |
| Rajasthan, Urban         | 5     |
| Sikkim, Urban            | 5     |
| Tamil Nadu, Urban        | 5     |

**Appendix Table 20: GBD 2015 geography hierarchy with levels**

|                                  | Level |
|----------------------------------|-------|
| Telangana, Urban                 | 5     |
| Tripura, Urban                   | 5     |
| Uttar Pradesh, Urban             | 5     |
| Uttarakhand, Urban               | 5     |
| West Bengal, Urban               | 5     |
| Andhra Pradesh, Rural            | 5     |
| Arunachal Pradesh, Rural         | 5     |
| Assam, Rural                     | 5     |
| Bihar, Rural                     | 5     |
| Chhattisgarh, Rural              | 5     |
| Delhi, Rural                     | 5     |
| Goa, Rural                       | 5     |
| Gujarat, Rural                   | 5     |
| Haryana, Rural                   | 5     |
| Himachal Pradesh, Rural          | 5     |
| Jammu and Kashmir, Rural         | 5     |
| Jharkhand, Rural                 | 5     |
| Karnataka, Rural                 | 5     |
| Kerala, Rural                    | 5     |
| Madhya Pradesh, Rural            | 5     |
| Maharashtra, Rural               | 5     |
| Manipur, Rural                   | 5     |
| Meghalaya, Rural                 | 5     |
| Mizoram, Rural                   | 5     |
| Nagaland, Rural                  | 5     |
| Orissa, Rural                    | 5     |
| Punjab, Rural                    | 5     |
| Rajasthan, Rural                 | 5     |
| Sikkim, Rural                    | 5     |
| Tamil Nadu, Rural                | 5     |
| Telangana, Rural                 | 5     |
| Tripura, Rural                   | 5     |
| Uttar Pradesh, Rural             | 5     |
| Uttarakhand, Rural               | 5     |
| West Bengal, Rural               | 5     |
| The Six Minor Territories        | 4     |
| The Six Minor Territories, Rural | 5     |
| The Six Minor Territories, Urban | 5     |
| Ha'il                            | 4     |
| Qassim                           | 4     |
| Riyadh                           | 4     |
| Tabuk                            | 4     |
| Madinah                          | 4     |
| Makkah                           | 4     |
| Bahah                            | 4     |

**Appendix Table 20: GBD 2015 geography hierarchy with levels**

|                  | Level |
|------------------|-------|
| Northern Borders | 4     |
| Jawf             | 4     |
| Jizan            | 4     |
| 'Asir            | 4     |
| Najran           | 4     |
| Eastern Province | 4     |



**Appendix Table 21: Causes included in the 2015 Global Burden of Disease Study**

| Cause level | Cause                                                                    | Cause of death | Cause of burden |
|-------------|--------------------------------------------------------------------------|----------------|-----------------|
| 0           | <b>All causes</b>                                                        | X              | X               |
| 1           | <b>Communicable, maternal, neonatal, and nutritional diseases</b>        | X              | X               |
| 2           | <b>HIV/AIDS and tuberculosis</b>                                         | X              | X               |
| 3           | Tuberculosis                                                             | X              | X               |
| 3           | HIV/AIDS                                                                 | X              | X               |
| 4           | HIV/AIDS - Tuberculosis                                                  | X              | X               |
| 4           | HIV/AIDS resulting in other diseases                                     | X              | X               |
| 2           | <b>Diarrhea, lower respiratory, and other common infectious diseases</b> | X              | X               |
| 3           | Diarrheal diseases                                                       | X              | X               |
| 3           | Intestinal infectious diseases                                           | X              | X               |
| 4           | Typhoid fever                                                            | X              | X               |
| 4           | Paratyphoid fever                                                        | X              | X               |
| 4           | Other intestinal infectious diseases                                     | X              | X               |
| 3           | Lower respiratory infections                                             | X              | X               |
| 3           | Upper respiratory infections                                             | X              | X               |
| 3           | Otitis media                                                             | X              | X               |
| 3           | Meningitis                                                               | X              | X               |
| 4           | Pneumococcal meningitis                                                  | X              | X               |
| 4           | H influenzae type B meningitis                                           | X              | X               |
| 4           | Meningococcal meningitis                                                 | X              | X               |
| 4           | Other meningitis                                                         | X              | X               |
| 3           | Encephalitis                                                             | X              | X               |
| 3           | Diphtheria                                                               | X              | X               |
| 3           | Whooping cough                                                           | X              | X               |
| 3           | Tetanus                                                                  | X              | X               |
| 3           | Measles                                                                  | X              | X               |
| 3           | Varicella and herpes zoster                                              | X              | X               |
| 2           | <b>Neglected tropical diseases and malaria</b>                           | X              | X               |
| 3           | Malaria                                                                  | X              | X               |
| 3           | Chagas disease                                                           | X              | X               |
| 3           | Leishmaniasis                                                            | X              | X               |
| 4           | Visceral leishmaniasis                                                   | X              | X               |
| 4           | Cutaneous and mucocutaneous leishmaniasis                                |                | X               |
| 3           | African trypanosomiasis                                                  | X              | X               |
| 3           | Schistosomiasis                                                          | X              | X               |
| 3           | Cysticercosis                                                            | X              | X               |
| 3           | Cystic echinococcosis                                                    | X              | X               |
| 3           | Lymphatic filariasis                                                     |                | X               |
| 3           | Onchocerciasis                                                           |                | X               |
| 3           | Trachoma                                                                 |                | X               |
| 3           | Dengue                                                                   | X              | X               |
| 3           | Yellow fever                                                             | X              | X               |
| 3           | Rabies                                                                   | X              | X               |
| 3           | Intestinal nematode infections                                           | X              | X               |
| 4           | Ascariasis                                                               | X              | X               |
| 4           | Trichuriasis                                                             |                | X               |
| 4           | Hookworm disease                                                         |                | X               |
| 3           | Food-borne trematodiasis                                                 |                | X               |
| 3           | Leprosy                                                                  |                | X               |

**Appendix Table 21: Causes included in the 2015 Global Burden of Disease Study**

| Cause level | Cause                                                                   | Cause of death | Cause of burden |
|-------------|-------------------------------------------------------------------------|----------------|-----------------|
| 3           | Ebola                                                                   | X              | X               |
| 3           | Other neglected tropical diseases                                       | X              | X               |
| 2           | <b>Maternal disorders</b>                                               | X              | X               |
| 3           | Maternal hemorrhage                                                     | X              | X               |
| 3           | Maternal sepsis and other maternal infections                           | X              | X               |
| 3           | Maternal hypertensive disorders                                         | X              | X               |
| 3           | Maternal obstructed labor and uterine rupture                           | X              | X               |
| 3           | Maternal abortion, miscarriage, and ectopic pregnancy                   | X              | X               |
| 3           | Indirect maternal deaths                                                | X              |                 |
| 3           | Late maternal deaths                                                    | X              |                 |
| 3           | Maternal deaths aggravated by HIV/AIDS                                  | X              |                 |
| 3           | Other maternal disorders                                                | X              | X               |
| 2           | <b>Neonatal disorders</b>                                               | X              | X               |
| 3           | Neonatal preterm birth complications                                    | X              | X               |
| 3           | Neonatal encephalopathy due to birth asphyxia and trauma                | X              | X               |
| 3           | Neonatal sepsis and other neonatal infections                           | X              | X               |
| 3           | Hemolytic disease and other neonatal jaundice                           | X              | X               |
| 3           | Other neonatal disorders                                                | X              | X               |
| 2           | <b>Nutritional deficiencies</b>                                         | X              | X               |
| 3           | Protein-energy malnutrition                                             | X              | X               |
| 3           | Iodine deficiency                                                       | X              | X               |
| 3           | Vitamin A deficiency                                                    |                | X               |
| 3           | Iron-deficiency anemia                                                  | X              | X               |
| 3           | Other nutritional deficiencies                                          | X              | X               |
| 2           | <b>Other communicable, maternal, neonatal, and nutritional diseases</b> | X              | X               |
| 3           | Sexually transmitted diseases excluding HIV                             | X              | X               |
| 4           | Syphilis                                                                | X              | X               |
| 4           | Chlamydial infection                                                    | X              | X               |
| 4           | Gonococcal infection                                                    | X              | X               |
| 4           | Trichomoniasis                                                          |                | X               |
| 4           | Genital herpes                                                          |                | X               |
| 4           | Other sexually transmitted diseases                                     | X              | X               |
| 3           | Hepatitis                                                               | X              | X               |
| 4           | Acute hepatitis A                                                       | X              | X               |
| 4           | Hepatitis B                                                             | X              | X               |
| 4           | Hepatitis C                                                             | X              | X               |
| 4           | Acute hepatitis E                                                       | X              | X               |
| 3           | Other infectious diseases                                               | X              | X               |
| 1           | <b>Non-communicable diseases</b>                                        | X              | X               |
| 2           | <b>Neoplasms</b>                                                        | X              | X               |
| 3           | Lip and oral cavity cancer                                              | X              | X               |
| 3           | Nasopharynx cancer                                                      | X              | X               |
| 3           | Other pharynx cancer                                                    | X              | X               |
| 3           | Esophageal cancer                                                       | X              | X               |
| 3           | Stomach cancer                                                          | X              | X               |
| 3           | Colon and rectum cancer                                                 | X              | X               |
| 3           | Liver cancer                                                            | X              | X               |
| 4           | Liver cancer due to hepatitis B                                         | X              | X               |
| 4           | Liver cancer due to hepatitis C                                         | X              | X               |

**Appendix Table 21: Causes included in the 2015 Global Burden of Disease Study**

| Cause level | Cause                                              | Cause of death | Cause of burden |
|-------------|----------------------------------------------------|----------------|-----------------|
| 4           | Liver cancer due to alcohol use                    | X              | X               |
| 4           | Liver cancer due to other causes                   | X              | X               |
| 3           | Gallbladder and biliary tract cancer               | X              | X               |
| 3           | Pancreatic cancer                                  | X              | X               |
| 3           | Larynx cancer                                      | X              | X               |
| 3           | Tracheal, bronchus, and lung cancer                | X              | X               |
| 3           | Malignant skin melanoma                            | X              | X               |
| 3           | Non-melanoma skin cancer                           | X              | X               |
| 4           | Non-melanoma skin cancer (squamous-cell carcinoma) | X              | X               |
| 4           | Non-melanoma skin cancer (basal-cell carcinoma)    |                | X               |
| 3           | Breast cancer                                      | X              | X               |
| 3           | Cervical cancer                                    | X              | X               |
| 3           | Uterine cancer                                     | X              | X               |
| 3           | Ovarian cancer                                     | X              | X               |
| 3           | Prostate cancer                                    | X              | X               |
| 3           | Testicular cancer                                  | X              | X               |
| 3           | Kidney cancer                                      | X              | X               |
| 3           | Bladder cancer                                     | X              | X               |
| 3           | Brain and nervous system cancer                    | X              | X               |
| 3           | Thyroid cancer                                     | X              | X               |
| 3           | Mesothelioma                                       | X              | X               |
| 3           | Hodgkin lymphoma                                   | X              | X               |
| 3           | Non-Hodgkin lymphoma                               | X              | X               |
| 3           | Multiple myeloma                                   | X              | X               |
| 3           | Leukemia                                           | X              | X               |
| 4           | Acute lymphoid leukemia                            | X              | X               |
| 4           | Chronic lymphoid leukemia                          | X              | X               |
| 4           | Acute myeloid leukemia                             | X              | X               |
| 4           | Chronic myeloid leukemia                           | X              | X               |
| 3           | Other neoplasms                                    | X              | X               |
| 2           | <b>Cardiovascular diseases</b>                     | X              | X               |
| 3           | Rheumatic heart disease                            | X              | X               |
| 3           | Ischemic heart disease                             | X              | X               |
| 3           | Cerebrovascular disease                            | X              | X               |
| 4           | Ischemic stroke                                    | X              | X               |
| 4           | Hemorrhagic stroke                                 | X              | X               |
| 3           | Hypertensive heart disease                         | X              | X               |
| 3           | Cardiomyopathy and myocarditis                     | X              | X               |
| 3           | Atrial fibrillation and flutter                    | X              | X               |
| 3           | Aortic aneurysm                                    | X              |                 |
| 3           | Peripheral vascular disease                        | X              | X               |
| 3           | Endocarditis                                       | X              | X               |
| 3           | Other cardiovascular and circulatory diseases      | X              | X               |
| 2           | <b>Chronic respiratory diseases</b>                | X              | X               |
| 3           | Chronic obstructive pulmonary disease              | X              | X               |
| 3           | Pneumoconiosis                                     | X              | X               |
| 4           | Silicosis                                          | X              | X               |
| 4           | Asbestosis                                         | X              | X               |
| 4           | Coal workers pneumoconiosis                        | X              | X               |

**Appendix Table 21: Causes included in the 2015 Global Burden of Disease Study**

| Cause level | Cause                                                          | Cause of death | Cause of burden |
|-------------|----------------------------------------------------------------|----------------|-----------------|
| 4           | Other pneumoconiosis                                           | X              | X               |
| 3           | Asthma                                                         | X              | X               |
| 3           | Interstitial lung disease and pulmonary sarcoidosis            | X              | X               |
| 3           | Other chronic respiratory diseases                             | X              | X               |
| 2           | <b>Cirrhosis and other chronic liver diseases</b>              | X              | X               |
| 3           | Cirrhosis and other chronic liver diseases due to hepatitis B  | X              | X               |
| 3           | Cirrhosis and other chronic liver diseases due to hepatitis C  | X              | X               |
| 3           | Cirrhosis and other chronic liver diseases due to alcohol use  | X              | X               |
| 3           | Cirrhosis and other chronic liver diseases due to other causes | X              | X               |
| 2           | <b>Digestive diseases</b>                                      | X              | X               |
| 3           | Peptic ulcer disease                                           | X              | X               |
| 3           | Gastritis and duodenitis                                       | X              | X               |
| 3           | Appendicitis                                                   | X              | X               |
| 3           | Paralytic ileus and intestinal obstruction                     | X              | X               |
| 3           | Inguinal, femoral, and abdominal hernia                        | X              | X               |
| 3           | Inflammatory bowel disease                                     | X              | X               |
| 3           | Vascular intestinal disorders                                  | X              | X               |
| 3           | Gallbladder and biliary diseases                               | X              | X               |
| 3           | Pancreatitis                                                   | X              | X               |
| 3           | Other digestive diseases                                       | X              | X               |
| 2           | <b>Neurological disorders</b>                                  | X              | X               |
| 3           | Alzheimer disease and other dementias                          | X              | X               |
| 3           | Parkinson disease                                              | X              | X               |
| 3           | Epilepsy                                                       | X              | X               |
| 3           | Multiple sclerosis                                             | X              | X               |
| 3           | Motor neuron disease                                           | X              | X               |
| 3           | Migraine                                                       |                | X               |
| 3           | Tension-type headache                                          |                | X               |
| 3           | Medication overuse headache                                    |                | X               |
| 3           | Other neurological disorders                                   | X              | X               |
| 2           | <b>Mental and substance use disorders</b>                      | X              | X               |
| 3           | Schizophrenia                                                  | X              | X               |
| 3           | Alcohol use disorders                                          | X              | X               |
| 3           | Drug use disorders                                             | X              | X               |
| 4           | Opioid use disorders                                           | X              | X               |
| 4           | Cocaine use disorders                                          | X              | X               |
| 4           | Amphetamine use disorders                                      | X              | X               |
| 4           | Cannabis use disorders                                         |                | X               |
| 4           | Other drug use disorders                                       | X              | X               |
| 3           | Depressive disorders                                           |                | X               |
| 4           | Major depressive disorder                                      |                | X               |
| 4           | Dysthymia                                                      |                | X               |
| 3           | Bipolar disorder                                               |                | X               |
| 3           | Anxiety disorders                                              |                | X               |
| 3           | Eating disorders                                               | X              | X               |
| 4           | Anorexia nervosa                                               | X              | X               |
| 4           | Bulimia nervosa                                                | X              | X               |
| 3           | Autistic spectrum disorders                                    |                | X               |
| 4           | Autism                                                         |                | X               |

**Appendix Table 21: Causes included in the 2015 Global Burden of Disease Study**

| Cause level | Cause                                                      | Cause of death | Cause of burden |
|-------------|------------------------------------------------------------|----------------|-----------------|
| 4           | Asperger syndrome and other autistic spectrum disorders    |                | X               |
| 3           | Attention-deficit/hyperactivity disorder                   |                | X               |
| 3           | Conduct disorder                                           |                | X               |
| 3           | Idiopathic developmental intellectual disability           |                | X               |
| 3           | Other mental and substance use disorders                   |                | X               |
| 2           | <b>Diabetes, urogenital, blood, and endocrine diseases</b> | X              | X               |
| 3           | Diabetes mellitus                                          | X              | X               |
| 3           | Acute glomerulonephritis                                   | X              | X               |
| 3           | Chronic kidney disease                                     | X              | X               |
| 4           | Chronic kidney disease due to diabetes mellitus            | X              | X               |
| 4           | Chronic kidney disease due to hypertension                 | X              | X               |
| 4           | Chronic kidney disease due to glomerulonephritis           | X              | X               |
| 4           | Chronic kidney disease due to other causes                 | X              | X               |
| 3           | Urinary diseases and male infertility                      | X              | X               |
| 4           | Interstitial nephritis and urinary tract infections        | X              | X               |
| 4           | Urolithiasis                                               | X              | X               |
| 4           | Benign prostatic hyperplasia                               |                | X               |
| 4           | Male infertility                                           |                | X               |
| 4           | Other urinary diseases                                     | X              | X               |
| 3           | Gynecological diseases                                     | X              | X               |
| 4           | Uterine fibroids                                           | X              | X               |
| 4           | Polycystic ovarian syndrome                                | X              | X               |
| 4           | Female infertility                                         |                | X               |
| 4           | Endometriosis                                              | X              | X               |
| 4           | Genital prolapse                                           | X              | X               |
| 4           | Premenstrual syndrome                                      |                | X               |
| 4           | Other gynecological diseases                               | X              | X               |
| 3           | Hemoglobinopathies and hemolytic anemias                   | X              | X               |
| 4           | Thalassemias                                               | X              | X               |
| 4           | Thalassemias trait                                         |                | X               |
| 4           | Sickle cell disorders                                      | X              | X               |
| 4           | Sickle cell trait                                          |                | X               |
| 4           | G6PD deficiency                                            | X              | X               |
| 4           | G6PD trait                                                 |                | X               |
| 4           | Other hemoglobinopathies and hemolytic anemias             | X              | X               |
| 3           | Endocrine, metabolic, blood, and immune disorders          | X              | X               |
| 2           | <b>Musculoskeletal disorders</b>                           | X              | X               |
| 3           | Rheumatoid arthritis                                       | X              | X               |
| 3           | Osteoarthritis                                             |                | X               |
| 3           | Low back and neck pain                                     |                | X               |
| 4           | Low back pain                                              |                | X               |
| 4           | Neck pain                                                  |                | X               |
| 3           | Gout                                                       |                | X               |
| 3           | Other musculoskeletal disorders                            | X              | X               |
| 2           | <b>Other non-communicable diseases</b>                     | X              | X               |
| 3           | Congenital anomalies                                       | X              | X               |
| 4           | Neural tube defects                                        | X              | X               |
| 4           | Congenital heart anomalies                                 | X              | X               |
| 4           | Cleft lip and cleft palate                                 | X              | X               |

**Appendix Table 21: Causes included in the 2015 Global Burden of Disease Study**

| Cause level | Cause                                  | Cause of death | Cause of burden |
|-------------|----------------------------------------|----------------|-----------------|
| 4           | Down syndrome                          | X              | X               |
| 4           | Turner syndrome                        |                | X               |
| 4           | Klinefelter syndrome                   |                | X               |
| 4           | Other chromosomal abnormalities        | X              | X               |
| 4           | Other congenital anomalies             | X              | X               |
| 3           | Skin and subcutaneous diseases         | X              | X               |
| 4           | Dermatitis                             |                | X               |
| 4           | Psoriasis                              |                | X               |
| 4           | Cellulitis                             | X              | X               |
| 4           | Pyoderma                               | X              | X               |
| 4           | Scabies                                |                | X               |
| 4           | Fungal skin diseases                   |                | X               |
| 4           | Viral skin diseases                    |                | X               |
| 4           | Acne vulgaris                          |                | X               |
| 4           | Alopecia areata                        |                | X               |
| 4           | Pruritus                               |                | X               |
| 4           | Urticaria                              |                | X               |
| 4           | Decubitus ulcer                        | X              | X               |
| 4           | Other skin and subcutaneous diseases   | X              | X               |
| 3           | Sense organ diseases                   |                | X               |
| 4           | Glaucoma                               |                | X               |
| 4           | Cataract                               |                | X               |
| 4           | Macular degeneration                   |                | X               |
| 4           | Refraction and accommodation disorders |                | X               |
| 4           | Age-related and other hearing loss     |                | X               |
| 4           | Other vision loss                      |                | X               |
| 4           | Other sense organ diseases             |                | X               |
| 3           | Oral disorders                         |                | X               |
| 4           | Deciduous caries                       |                | X               |
| 4           | Permanent caries                       |                | X               |
| 4           | Periodontal diseases                   |                | X               |
| 4           | Edentulism and severe tooth loss       |                | X               |
| 4           | Other oral disorders                   |                | X               |
| 3           | Sudden infant death syndrome           | X              |                 |
| 1           | <b>Injuries</b>                        | X              | X               |
| 2           | <b>Transport injuries</b>              | X              | X               |
| 3           | Road injuries                          | X              | X               |
| 4           | Pedestrian road injuries               | X              | X               |
| 4           | Cyclist road injuries                  | X              | X               |
| 4           | Motorcyclist road injuries             | X              | X               |
| 4           | Motor vehicle road injuries            | X              | X               |
| 4           | Other road injuries                    | X              | X               |
| 3           | Other transport injuries               | X              | X               |
| 2           | <b>Unintentional injuries</b>          | X              | X               |
| 3           | Falls                                  | X              | X               |
| 3           | Drowning                               | X              | X               |
| 3           | Fire, heat, and hot substances         | X              | X               |
| 3           | Poisonings                             | X              | X               |
| 3           | Exposure to mechanical forces          | X              | X               |

**Appendix Table 21: Causes included in the 2015 Global Burden of Disease Study**

| Cause level | Cause                                                | Cause of death | Cause of burden |
|-------------|------------------------------------------------------|----------------|-----------------|
| 4           | Unintentional firearm injuries                       | X              | X               |
| 4           | Unintentional suffocation                            | X              | X               |
| 4           | Other exposure to mechanical forces                  | X              | X               |
| 3           | Adverse effects of medical treatment                 | X              | X               |
| 3           | Animal contact                                       | X              | X               |
| 4           | Venomous animal contact                              | X              | X               |
| 4           | Non-venomous animal contact                          | X              | X               |
| 3           | Foreign body                                         | X              | X               |
| 4           | Pulmonary aspiration and foreign body in airway      | X              | X               |
| 4           | Foreign body in eyes                                 |                | X               |
| 4           | Foreign body in other body part                      | X              | X               |
| 3           | Environmental heat and cold exposure                 | X              | X               |
| 3           | Other unintentional injuries                         | X              | X               |
| 2           | <b>Self-harm and interpersonal violence</b>          | X              | X               |
| 3           | Self-harm                                            | X              | X               |
| 3           | Interpersonal violence                               | X              | X               |
| 4           | Assault by firearm                                   | X              | X               |
| 4           | Assault by sharp object                              | X              | X               |
| 4           | Assault by other means                               | X              | X               |
| 2           | <b>Forces of nature, war, and legal intervention</b> | X              | X               |
| 3           | Exposure to forces of nature                         | X              | X               |
| 3           | Collective violence and legal intervention           | X              | X               |

**Appendix Table 22: Classification of each geography into six data availability categories**

| Location                                         | Completeness Group                                  |
|--------------------------------------------------|-----------------------------------------------------|
| China                                            | 1 or more years of +70% complete vital registration |
| Anhui                                            | 5-24 years of +95% complete vital registration      |
| Beijing                                          | 5-24 years of +95% complete vital registration      |
| Chongqing                                        | 5-24 years of +95% complete vital registration      |
| Fujian                                           | 5-24 years of +95% complete vital registration      |
| Gansu                                            | 5-24 years of +95% complete vital registration      |
| Guangdong                                        | 5-24 years of +95% complete vital registration      |
| Guangxi                                          | 5-24 years of +95% complete vital registration      |
| Guizhou                                          | 1 or more years of +70% complete vital registration |
| Hainan                                           | 1 or more years of +70% complete vital registration |
| Hebei                                            | 1 or more years of +70% complete vital registration |
| Heilongjiang                                     | 1 or more years of +70% complete vital registration |
| Henan                                            | 5-24 years of +95% complete vital registration      |
| Hong Kong Special Administrative Region of China | 25+ years of +95% complete vital registration       |
| Hubei                                            | 1 or more years of +70% complete vital registration |
| Hunan                                            | 5-24 years of +95% complete vital registration      |
| Inner Mongolia                                   | 1 or more years of +70% complete vital registration |
| Jiangsu                                          | 5-24 years of +95% complete vital registration      |
| Jiangxi                                          | 5-24 years of +95% complete vital registration      |
| Jilin                                            | 5-24 years of +95% complete vital registration      |
| Liaoning                                         | 5-24 years of +95% complete vital registration      |
| Macao Special Administrative Region of China     | 1 or more years of +70% complete vital registration |
| Ningxia                                          | 5-24 years of +95% complete vital registration      |
| Qinghai                                          | 5-24 years of +95% complete vital registration      |
| Shaanxi                                          | 5-24 years of +95% complete vital registration      |
| Shandong                                         | 5-24 years of +95% complete vital registration      |
| Shanghai                                         | 5-24 years of +95% complete vital registration      |
| Shanxi                                           | 5-24 years of +95% complete vital registration      |
| Sichuan                                          | 5-24 years of +95% complete vital registration      |



**Appendix Table 22: Classification of each geography into six data availability categories**

| Location                       | Completeness Group                                                       |
|--------------------------------|--------------------------------------------------------------------------|
| Tianjin                        | 5-24 years of +95% complete vital registration                           |
| Tibet                          | 1 or more years of +70% complete vital registration                      |
| Xinjiang                       | 1 or more years of +70% complete vital registration                      |
| Yunnan                         | 1 or more years of +70% complete vital registration                      |
| Zhejiang                       | 5-24 years of +95% complete vital registration                           |
| North Korea                    | Less than 200 cause-years of verbal autopsy, or other data               |
| Taiwan                         | 5-24 years of +95% complete vital registration                           |
| Cambodia                       | Less than 200 cause-years of verbal autopsy, or other data               |
| Indonesia                      | Less than 200 cause-years of verbal autopsy, or other data               |
| Laos                           | Less than 200 cause-years of verbal autopsy, or other data               |
| Malaysia                       | 5-24 years of +95% complete vital registration                           |
| Maldives                       | 5-24 years of +95% complete vital registration                           |
| Mauritius                      | 25+ years of +95% complete vital registration                            |
| Myanmar                        | Less than 200 cause-years of verbal autopsy, or other data               |
| Philippines                    | 25+ years of +95% complete vital registration                            |
| Sri Lanka                      | 25+ years of +95% complete vital registration                            |
| Seychelles                     | 5-24 years of +95% complete vital registration                           |
| Thailand                       | 1 or more years of +70% complete vital registration                      |
| Timor-Leste                    | Less than 200 cause-years of verbal autopsy, or other data               |
| Vietnam                        | Less than 200 cause-years of verbal autopsy, or other data               |
| American Samoa                 | 1 or more years of +70% complete vital registration                      |
| Federated States of Micronesia | Less than 200 cause-years of verbal autopsy, or other data               |
| Fiji                           | 1 or more years of +70% complete vital registration                      |
| Guam                           | 1 or more years of +70% complete vital registration                      |
| Kiribati                       | 1 or more year of +50% complete VR, or 200 cause-years of verbal autopsy |
| Marshall Islands               | Less than 200 cause-years of verbal autopsy, or other data               |
| Northern Mariana Islands       | 1 or more years of +70% complete vital registration                      |
| Papua New Guinea               | Less than 200 cause-years of verbal autopsy, or other data               |
| Samoa                          | Less than 200 cause-years of verbal autopsy, or other data               |

**Appendix Table 22: Classification of each geography into six data availability categories**

| Location               | Completeness Group                                         |
|------------------------|------------------------------------------------------------|
| Solomon Islands        | Less than 200 cause-years of verbal autopsy, or other data |
| Tonga                  | 1 or more years of +70% complete vital registration        |
| Vanuatu                | Less than 200 cause-years of verbal autopsy, or other data |
| Armenia                | 5-24 years of +95% complete vital registration             |
| Azerbaijan             | 1 or more years of +70% complete vital registration        |
| Georgia                | 1 or more years of +70% complete vital registration        |
| Kazakhstan             | 25+ years of +95% complete vital registration              |
| Kyrgyzstan             | 1 or more years of +70% complete vital registration        |
| Mongolia               | 1 or more years of +70% complete vital registration        |
| Tajikistan             | 1 or more years of +70% complete vital registration        |
| Turkmenistan           | 5-24 years of +95% complete vital registration             |
| Uzbekistan             | 1 or more years of +70% complete vital registration        |
| Albania                | 1 or more years of +70% complete vital registration        |
| Bosnia and Herzegovina | 5-24 years of +95% complete vital registration             |
| Bulgaria               | 25+ years of +95% complete vital registration              |
| Croatia                | 25+ years of +95% complete vital registration              |
| Czech Republic         | 25+ years of +95% complete vital registration              |
| Hungary                | 25+ years of +95% complete vital registration              |
| Macedonia              | 5-24 years of +95% complete vital registration             |
| Montenegro             | 5-24 years of +95% complete vital registration             |
| Poland                 | 25+ years of +95% complete vital registration              |
| Romania                | 25+ years of +95% complete vital registration              |
| Serbia                 | 5-24 years of +95% complete vital registration             |
| Slovakia               | 5-24 years of +95% complete vital registration             |
| Slovenia               | 25+ years of +95% complete vital registration              |
| Belarus                | 5-24 years of +95% complete vital registration             |
| Estonia                | 25+ years of +95% complete vital registration              |
| Latvia                 | 25+ years of +95% complete vital registration              |
| Lithuania              | 25+ years of +95% complete vital registration              |

**Appendix Table 22: Classification of each geography into six data availability categories**

| Location  | Completeness Group                                  |
|-----------|-----------------------------------------------------|
| Moldova   | 25+ years of +95% complete vital registration       |
| Russia    | 25+ years of +95% complete vital registration       |
| Ukraine   | 25+ years of +95% complete vital registration       |
| Brunei    | 1 or more years of +70% complete vital registration |
| Japan     | 25+ years of +95% complete vital registration       |
| Aichi     | 25+ years of +95% complete vital registration       |
| Akita     | 25+ years of +95% complete vital registration       |
| Aomori    | 25+ years of +95% complete vital registration       |
| Chiba     | 25+ years of +95% complete vital registration       |
| Ehime     | 25+ years of +95% complete vital registration       |
| Fukui     | 25+ years of +95% complete vital registration       |
| Fukuoka   | 25+ years of +95% complete vital registration       |
| Fukushima | 25+ years of +95% complete vital registration       |
| Gifu      | 25+ years of +95% complete vital registration       |
| Gunma     | 25+ years of +95% complete vital registration       |
| Hiroshima | 25+ years of +95% complete vital registration       |
| Hokkaidō  | 25+ years of +95% complete vital registration       |
| Hyōgo     | 25+ years of +95% complete vital registration       |
| Ibaraki   | 25+ years of +95% complete vital registration       |
| Ishikawa  | 25+ years of +95% complete vital registration       |
| Iwate     | 25+ years of +95% complete vital registration       |
| Kagawa    | 25+ years of +95% complete vital registration       |
| Kagoshima | 25+ years of +95% complete vital registration       |
| Kanagawa  | 25+ years of +95% complete vital registration       |
| Kōchi     | 25+ years of +95% complete vital registration       |
| Kumamoto  | 25+ years of +95% complete vital registration       |
| Kyōto     | 25+ years of +95% complete vital registration       |
| Mie       | 25+ years of +95% complete vital registration       |
| Miyagi    | 25+ years of +95% complete vital registration       |

**Appendix Table 22: Classification of each geography into six data availability categories**

| Location    | Completeness Group                            |
|-------------|-----------------------------------------------|
| Miyazaki    | 25+ years of +95% complete vital registration |
| Nagano      | 25+ years of +95% complete vital registration |
| Nagasaki    | 25+ years of +95% complete vital registration |
| Nara        | 25+ years of +95% complete vital registration |
| Niigata     | 25+ years of +95% complete vital registration |
| Ôita        | 25+ years of +95% complete vital registration |
| Okayama     | 25+ years of +95% complete vital registration |
| Okinawa     | 25+ years of +95% complete vital registration |
| Ôsaka       | 25+ years of +95% complete vital registration |
| Saga        | 25+ years of +95% complete vital registration |
| Saitama     | 25+ years of +95% complete vital registration |
| Shiga       | 25+ years of +95% complete vital registration |
| Shimane     | 25+ years of +95% complete vital registration |
| Shizuoka    | 25+ years of +95% complete vital registration |
| Tochigi     | 25+ years of +95% complete vital registration |
| Tokushima   | 25+ years of +95% complete vital registration |
| Tôkyô       | 25+ years of +95% complete vital registration |
| Tottori     | 25+ years of +95% complete vital registration |
| Toyama      | 25+ years of +95% complete vital registration |
| Wakayama    | 25+ years of +95% complete vital registration |
| Yamagata    | 25+ years of +95% complete vital registration |
| Yamaguchi   | 25+ years of +95% complete vital registration |
| Yamanashi   | 25+ years of +95% complete vital registration |
| South Korea | 25+ years of +95% complete vital registration |
| Singapore   | 25+ years of +95% complete vital registration |
| Australia   | 25+ years of +95% complete vital registration |
| New Zealand | 25+ years of +95% complete vital registration |
| Andorra     | No data                                       |
| Austria     | 25+ years of +95% complete vital registration |

**Appendix Table 22: Classification of each geography into six data availability categories**

| Location                | Completeness Group                             |
|-------------------------|------------------------------------------------|
| Belgium                 | 25+ years of +95% complete vital registration  |
| Cyprus                  | 5-24 years of +95% complete vital registration |
| Denmark                 | 25+ years of +95% complete vital registration  |
| Finland                 | 25+ years of +95% complete vital registration  |
| France                  | 25+ years of +95% complete vital registration  |
| Germany                 | 25+ years of +95% complete vital registration  |
| Greece                  | 25+ years of +95% complete vital registration  |
| Iceland                 | 25+ years of +95% complete vital registration  |
| Ireland                 | 25+ years of +95% complete vital registration  |
| Israel                  | 25+ years of +95% complete vital registration  |
| Italy                   | 25+ years of +95% complete vital registration  |
| Luxembourg              | 25+ years of +95% complete vital registration  |
| Malta                   | 25+ years of +95% complete vital registration  |
| Netherlands             | 25+ years of +95% complete vital registration  |
| Norway                  | 25+ years of +95% complete vital registration  |
| Portugal                | 25+ years of +95% complete vital registration  |
| Spain                   | 25+ years of +95% complete vital registration  |
| Sweden                  | 25+ years of +95% complete vital registration  |
| Stockholm               | 25+ years of +95% complete vital registration  |
| Sweden except Stockholm | 25+ years of +95% complete vital registration  |
| Switzerland             | 25+ years of +95% complete vital registration  |
| United Kingdom          | 25+ years of +95% complete vital registration  |
| England                 | No data                                        |
| East Midlands           | 25+ years of +95% complete vital registration  |
| East of England         | 25+ years of +95% complete vital registration  |
| Greater London          | 25+ years of +95% complete vital registration  |
| North East England      | 25+ years of +95% complete vital registration  |
| North West England      | 25+ years of +95% complete vital registration  |
| South East England      | 25+ years of +95% complete vital registration  |

**Appendix Table 22: Classification of each geography into six data availability categories**

| Location                 | Completeness Group                             |
|--------------------------|------------------------------------------------|
| South West England       | 25+ years of +95% complete vital registration  |
| West Midlands            | 25+ years of +95% complete vital registration  |
| Yorkshire and the Humber | 25+ years of +95% complete vital registration  |
| Northern Ireland         | 25+ years of +95% complete vital registration  |
| Scotland                 | 25+ years of +95% complete vital registration  |
| Wales                    | 25+ years of +95% complete vital registration  |
| Argentina                | 25+ years of +95% complete vital registration  |
| Chile                    | 25+ years of +95% complete vital registration  |
| Uruguay                  | 25+ years of +95% complete vital registration  |
| Canada                   | 25+ years of +95% complete vital registration  |
| Greenland                | 5-24 years of +95% complete vital registration |
| United States            | 25+ years of +95% complete vital registration  |
| Alabama                  | 25+ years of +95% complete vital registration  |
| Alaska                   | 25+ years of +95% complete vital registration  |
| Arizona                  | 25+ years of +95% complete vital registration  |
| Arkansas                 | 25+ years of +95% complete vital registration  |
| California               | 25+ years of +95% complete vital registration  |
| Colorado                 | 25+ years of +95% complete vital registration  |
| Connecticut              | 25+ years of +95% complete vital registration  |
| Delaware                 | 25+ years of +95% complete vital registration  |
| District of Columbia     | 25+ years of +95% complete vital registration  |
| Florida                  | 25+ years of +95% complete vital registration  |
| Georgia                  | 25+ years of +95% complete vital registration  |
| Hawaii                   | 25+ years of +95% complete vital registration  |
| Idaho                    | 25+ years of +95% complete vital registration  |
| Illinois                 | 25+ years of +95% complete vital registration  |
| Indiana                  | 25+ years of +95% complete vital registration  |
| Iowa                     | 25+ years of +95% complete vital registration  |
| Kansas                   | 25+ years of +95% complete vital registration  |

**Appendix Table 22: Classification of each geography into six data availability categories**

| Location       | Completeness Group                            |
|----------------|-----------------------------------------------|
| Kentucky       | 25+ years of +95% complete vital registration |
| Louisiana      | 25+ years of +95% complete vital registration |
| Maine          | 25+ years of +95% complete vital registration |
| Maryland       | 25+ years of +95% complete vital registration |
| Massachusetts  | 25+ years of +95% complete vital registration |
| Michigan       | 25+ years of +95% complete vital registration |
| Minnesota      | 25+ years of +95% complete vital registration |
| Mississippi    | 25+ years of +95% complete vital registration |
| Missouri       | 25+ years of +95% complete vital registration |
| Montana        | 25+ years of +95% complete vital registration |
| Nebraska       | 25+ years of +95% complete vital registration |
| Nevada         | 25+ years of +95% complete vital registration |
| New Hampshire  | 25+ years of +95% complete vital registration |
| New Jersey     | 25+ years of +95% complete vital registration |
| New Mexico     | 25+ years of +95% complete vital registration |
| New York       | 25+ years of +95% complete vital registration |
| North Carolina | 25+ years of +95% complete vital registration |
| North Dakota   | 25+ years of +95% complete vital registration |
| Ohio           | 25+ years of +95% complete vital registration |
| Oklahoma       | 25+ years of +95% complete vital registration |
| Oregon         | 25+ years of +95% complete vital registration |
| Pennsylvania   | 25+ years of +95% complete vital registration |
| Rhode Island   | 25+ years of +95% complete vital registration |
| South Carolina | 25+ years of +95% complete vital registration |
| South Dakota   | 25+ years of +95% complete vital registration |
| Tennessee      | 25+ years of +95% complete vital registration |
| Texas          | 25+ years of +95% complete vital registration |
| Utah           | 25+ years of +95% complete vital registration |
| Vermont        | 25+ years of +95% complete vital registration |

**Appendix Table 22: Classification of each geography into six data availability categories**

| Location                         | Completeness Group                                                       |
|----------------------------------|--------------------------------------------------------------------------|
| Virginia                         | 25+ years of +95% complete vital registration                            |
| Washington                       | 25+ years of +95% complete vital registration                            |
| West Virginia                    | 25+ years of +95% complete vital registration                            |
| Wisconsin                        | 25+ years of +95% complete vital registration                            |
| Wyoming                          | 25+ years of +95% complete vital registration                            |
| Antigua and Barbuda              | 25+ years of +95% complete vital registration                            |
| The Bahamas                      | 1 or more years of +70% complete vital registration                      |
| Barbados                         | 25+ years of +95% complete vital registration                            |
| Belize                           | 5-24 years of +95% complete vital registration                           |
| Bermuda                          | 25+ years of +95% complete vital registration                            |
| Cuba                             | 25+ years of +95% complete vital registration                            |
| Dominica                         | 5-24 years of +95% complete vital registration                           |
| Dominican Republic               | 1 or more years of +70% complete vital registration                      |
| Grenada                          | 5-24 years of +95% complete vital registration                           |
| Guyana                           | 1 or more years of +70% complete vital registration                      |
| Haiti                            | Less than 200 cause-years of verbal autopsy, or other data               |
| Jamaica                          | 5-24 years of +95% complete vital registration                           |
| Puerto Rico                      | 25+ years of +95% complete vital registration                            |
| Saint Lucia                      | 25+ years of +95% complete vital registration                            |
| Saint Vincent and the Grenadines | 25+ years of +95% complete vital registration                            |
| Suriname                         | 1 or more years of +70% complete vital registration                      |
| Trinidad and Tobago              | 25+ years of +95% complete vital registration                            |
| Virgin Islands, U.S.             | 1 or more years of +70% complete vital registration                      |
| Bolivia                          | 1 or more year of +50% complete VR, or 200 cause-years of verbal autopsy |
| Ecuador                          | 5-24 years of +95% complete vital registration                           |
| Peru                             | 1 or more years of +70% complete vital registration                      |
| Colombia                         | 25+ years of +95% complete vital registration                            |
| Costa Rica                       | 25+ years of +95% complete vital registration                            |
| El Salvador                      | 1 or more years of +70% complete vital registration                      |



**Appendix Table 22: Classification of each geography into six data availability categories**

| Location            | Completeness Group                             |
|---------------------|------------------------------------------------|
| Guatemala           | 25+ years of +95% complete vital registration  |
| Honduras            | 5-24 years of +95% complete vital registration |
| Mexico              | 25+ years of +95% complete vital registration  |
| Aguascalientes      | 25+ years of +95% complete vital registration  |
| Baja California     | 25+ years of +95% complete vital registration  |
| Baja California Sur | 25+ years of +95% complete vital registration  |
| Campeche            | 25+ years of +95% complete vital registration  |
| Chiapas             | 25+ years of +95% complete vital registration  |
| Chihuahua           | 25+ years of +95% complete vital registration  |
| Coahuila            | 25+ years of +95% complete vital registration  |
| Colima              | 25+ years of +95% complete vital registration  |
| Distrito Federal    | 25+ years of +95% complete vital registration  |
| Durango             | 25+ years of +95% complete vital registration  |
| Guanajuato          | 25+ years of +95% complete vital registration  |
| Guerrero            | 25+ years of +95% complete vital registration  |
| Hidalgo             | 25+ years of +95% complete vital registration  |
| Jalisco             | 25+ years of +95% complete vital registration  |
| México              | 25+ years of +95% complete vital registration  |
| Michoacán de Ocampo | 25+ years of +95% complete vital registration  |
| Morelos             | 25+ years of +95% complete vital registration  |
| Nayarit             | 25+ years of +95% complete vital registration  |
| Nuevo León          | 25+ years of +95% complete vital registration  |
| Oaxaca              | 25+ years of +95% complete vital registration  |
| Puebla              | 25+ years of +95% complete vital registration  |
| Querétaro           | 25+ years of +95% complete vital registration  |
| Quintana Roo        | 25+ years of +95% complete vital registration  |
| San Luis Potosí     | 25+ years of +95% complete vital registration  |
| Sinaloa             | 25+ years of +95% complete vital registration  |
| Sonora              | 25+ years of +95% complete vital registration  |

**Appendix Table 22: Classification of each geography into six data availability categories**

| Location                        | Completeness Group                                  |
|---------------------------------|-----------------------------------------------------|
| Tabasco                         | 25+ years of +95% complete vital registration       |
| Tamaulipas                      | 25+ years of +95% complete vital registration       |
| Tlaxcala                        | 25+ years of +95% complete vital registration       |
| Veracruz de Ignacio de la Llave | 25+ years of +95% complete vital registration       |
| Yucatán                         | 25+ years of +95% complete vital registration       |
| Zacatecas                       | 25+ years of +95% complete vital registration       |
| Nicaragua                       | 5-24 years of +95% complete vital registration      |
| Panama                          | 5-24 years of +95% complete vital registration      |
| Venezuela                       | 25+ years of +95% complete vital registration       |
| Brazil                          | 5-24 years of +95% complete vital registration      |
| Acre                            | 1 or more years of +70% complete vital registration |
| Alagoas                         | 1 or more years of +70% complete vital registration |
| Amapá                           | 1 or more years of +70% complete vital registration |
| Amazonas                        | 1 or more years of +70% complete vital registration |
| Bahia                           | 1 or more years of +70% complete vital registration |
| Ceará                           | 1 or more years of +70% complete vital registration |
| Distrito Federal                | 25+ years of +95% complete vital registration       |
| Espírito Santo                  | 1 or more years of +70% complete vital registration |
| Goiás                           | 5-24 years of +95% complete vital registration      |
| Maranhão                        | 1 or more years of +70% complete vital registration |
| Mato Grosso                     | 1 or more years of +70% complete vital registration |
| Mato Grosso do Sul              | 5-24 years of +95% complete vital registration      |
| Minas Gerais                    | 5-24 years of +95% complete vital registration      |
| Pará                            | 1 or more years of +70% complete vital registration |
| Paraíba                         | 1 or more years of +70% complete vital registration |
| Paraná                          | 5-24 years of +95% complete vital registration      |
| Pernambuco                      | 1 or more years of +70% complete vital registration |
| Piauí                           | 1 or more years of +70% complete vital registration |
| Rio de Janeiro                  | 25+ years of +95% complete vital registration       |

**Appendix Table 22: Classification of each geography into six data availability categories**

| Location            | Completeness Group                                                       |
|---------------------|--------------------------------------------------------------------------|
| Rio Grande do Norte | 1 or more years of +70% complete vital registration                      |
| Rio Grande do Sul   | 1 or more years of +70% complete vital registration                      |
| Rondônia            | 1 or more years of +70% complete vital registration                      |
| Roraima             | 1 or more years of +70% complete vital registration                      |
| Santa Catarina      | 5-24 years of +95% complete vital registration                           |
| São Paulo           | 25+ years of +95% complete vital registration                            |
| Sergipe             | 1 or more years of +70% complete vital registration                      |
| Tocantins           | 1 or more years of +70% complete vital registration                      |
| Paraguay            | 1 or more years of +70% complete vital registration                      |
| Afghanistan         | Less than 200 cause-years of verbal autopsy, or other data               |
| Algeria             | Less than 200 cause-years of verbal autopsy, or other data               |
| Bahrain             | 1 or more years of +70% complete vital registration                      |
| Egypt               | 5-24 years of +95% complete vital registration                           |
| Iran                | 1 or more years of +70% complete vital registration                      |
| Iraq                | 1 or more year of +50% complete VR, or 200 cause-years of verbal autopsy |
| Jordan              | 1 or more years of +70% complete vital registration                      |
| Kuwait              | 25+ years of +95% complete vital registration                            |
| Lebanon             | Less than 200 cause-years of verbal autopsy, or other data               |
| Libya               | 1 or more years of +70% complete vital registration                      |
| Morocco             | 1 or more years of +70% complete vital registration                      |
| Palestine           | 1 or more year of +50% complete VR, or 200 cause-years of verbal autopsy |
| Oman                | 1 or more years of +70% complete vital registration                      |
| Qatar               | 1 or more years of +70% complete vital registration                      |
| Saudi Arabia        | 1 or more years of +70% complete vital registration                      |
| 'Asir               | No data                                                                  |
| Bahah               | No data                                                                  |
| Eastern Province    | 1 or more years of +70% complete vital registration                      |
| Ha'il               | No data                                                                  |
| Jawf                | 1 or more year of +50% complete VR, or 200 cause-years of verbal autopsy |
| Jizan               | No data                                                                  |

**Appendix Table 22: Classification of each geography into six data availability categories**

| Location                 | Completeness Group                                                       |
|--------------------------|--------------------------------------------------------------------------|
| Madinah                  | 1 or more years of +70% complete vital registration                      |
| Makkah                   | 1 or more year of +50% complete VR, or 200 cause-years of verbal autopsy |
| Najran                   | No data                                                                  |
| Northern Borders         | 1 or more years of +70% complete vital registration                      |
| Qassim                   | 1 or more year of +50% complete VR, or 200 cause-years of verbal autopsy |
| Riyadh                   | 1 or more year of +50% complete VR, or 200 cause-years of verbal autopsy |
| Tabuk                    | 1 or more year of +50% complete VR, or 200 cause-years of verbal autopsy |
| Sudan                    | Less than 200 cause-years of verbal autopsy, or other data               |
| Syria                    | 5-24 years of +95% complete vital registration                           |
| Tunisia                  | Less than 200 cause-years of verbal autopsy, or other data               |
| Turkey                   | 5-24 years of +95% complete vital registration                           |
| United Arab Emirates     | 1 or more year of +50% complete VR, or 200 cause-years of verbal autopsy |
| Yemen                    | Less than 200 cause-years of verbal autopsy, or other data               |
| Bangladesh               | 1 or more year of +50% complete VR, or 200 cause-years of verbal autopsy |
| Bhutan                   | Less than 200 cause-years of verbal autopsy, or other data               |
| India                    | 1 or more year of +50% complete VR, or 200 cause-years of verbal autopsy |
| Andhra Pradesh           | 1 or more year of +50% complete VR, or 200 cause-years of verbal autopsy |
| Andhra Pradesh, Rural    | 1 or more year of +50% complete VR, or 200 cause-years of verbal autopsy |
| Andhra Pradesh, Urban    | 1 or more year of +50% complete VR, or 200 cause-years of verbal autopsy |
| Arunāchal Pradesh        | Less than 200 cause-years of verbal autopsy, or other data               |
| Arunāchal Pradesh, Rural | Less than 200 cause-years of verbal autopsy, or other data               |
| Arunāchal Pradesh, Urban | 5-24 years of +95% complete vital registration                           |
| Assam                    | 1 or more year of +50% complete VR, or 200 cause-years of verbal autopsy |
| Assam, Rural             | 1 or more year of +50% complete VR, or 200 cause-years of verbal autopsy |
| Assam, Urban             | 1 or more years of +70% complete vital registration                      |
| Bihār                    | 1 or more year of +50% complete VR, or 200 cause-years of verbal autopsy |
| Bihār, Rural             | 1 or more year of +50% complete VR, or 200 cause-years of verbal autopsy |
| Bihār, Urban             | Less than 200 cause-years of verbal autopsy, or other data               |
| Chhattīsgarh             | Less than 200 cause-years of verbal autopsy, or other data               |

**Appendix Table 22: Classification of each geography into six data availability categories**

| Location                 | Completeness Group                                                       |
|--------------------------|--------------------------------------------------------------------------|
| Chhattīsgarh, Rural      | Less than 200 cause-years of verbal autopsy, or other data               |
| Chhattīsgarh, Urban      | Less than 200 cause-years of verbal autopsy, or other data               |
| Delhi                    | 1 or more year of +50% complete VR, or 200 cause-years of verbal autopsy |
| Delhi, Rural             | 1 or more year of +50% complete VR, or 200 cause-years of verbal autopsy |
| Delhi, Urban             | 1 or more years of +70% complete vital registration                      |
| Goa                      | 1 or more year of +50% complete VR, or 200 cause-years of verbal autopsy |
| Goa, Rural               | 1 or more year of +50% complete VR, or 200 cause-years of verbal autopsy |
| Goa, Urban               | 25+ years of +95% complete vital registration                            |
| Gujarāt                  | 1 or more year of +50% complete VR, or 200 cause-years of verbal autopsy |
| Gujarāt, Rural           | 1 or more year of +50% complete VR, or 200 cause-years of verbal autopsy |
| Gujarāt, Urban           | Less than 200 cause-years of verbal autopsy, or other data               |
| Haryāna                  | 1 or more year of +50% complete VR, or 200 cause-years of verbal autopsy |
| Haryāna, Rural           | 1 or more year of +50% complete VR, or 200 cause-years of verbal autopsy |
| Haryāna, Urban           | Less than 200 cause-years of verbal autopsy, or other data               |
| Himachal Pradesh         | 1 or more year of +50% complete VR, or 200 cause-years of verbal autopsy |
| Himachal Pradesh, Rural  | 1 or more year of +50% complete VR, or 200 cause-years of verbal autopsy |
| Himachal Pradesh, Urban  | 1 or more years of +70% complete vital registration                      |
| Jammu and Kashmīr        | 1 or more year of +50% complete VR, or 200 cause-years of verbal autopsy |
| Jammu and Kashmīr, Rural | 1 or more year of +50% complete VR, or 200 cause-years of verbal autopsy |
| Jammu and Kashmīr, Urban | Less than 200 cause-years of verbal autopsy, or other data               |
| Jharkhand                | Less than 200 cause-years of verbal autopsy, or other data               |
| Jharkhand, Rural         | Less than 200 cause-years of verbal autopsy, or other data               |
| Jharkhand, Urban         | Less than 200 cause-years of verbal autopsy, or other data               |
| Karnātaka                | 1 or more year of +50% complete VR, or 200 cause-years of verbal autopsy |
| Karnātaka, Rural         | 1 or more year of +50% complete VR, or 200 cause-years of verbal autopsy |
| Karnātaka, Urban         | 1 or more years of +70% complete vital registration                      |
| Kerala                   | 1 or more year of +50% complete VR, or 200 cause-years of verbal autopsy |
| Kerala, Rural            | 1 or more year of +50% complete VR, or 200 cause-years of verbal autopsy |
| Kerala, Urban            | Less than 200 cause-years of verbal autopsy, or other data               |

**Appendix Table 22: Classification of each geography into six data availability categories**

| Location              | Completeness Group                                                       |
|-----------------------|--------------------------------------------------------------------------|
| Madhya Pradesh        | 1 or more year of +50% complete VR, or 200 cause-years of verbal autopsy |
| Madhya Pradesh, Rural | 1 or more year of +50% complete VR, or 200 cause-years of verbal autopsy |
| Madhya Pradesh, Urban | Less than 200 cause-years of verbal autopsy, or other data               |
| Mahārāshtra           | 1 or more year of +50% complete VR, or 200 cause-years of verbal autopsy |
| Mahārāshtra, Rural    | 1 or more year of +50% complete VR, or 200 cause-years of verbal autopsy |
| Mahārāshtra, Urban    | 1 or more year of +50% complete VR, or 200 cause-years of verbal autopsy |
| Manipur               | 1 or more year of +50% complete VR, or 200 cause-years of verbal autopsy |
| Manipur, Rural        | 1 or more year of +50% complete VR, or 200 cause-years of verbal autopsy |
| Manipur, Urban        | 1 or more year of +50% complete VR, or 200 cause-years of verbal autopsy |
| Meghālaya             | 1 or more year of +50% complete VR, or 200 cause-years of verbal autopsy |
| Meghālaya, Rural      | 1 or more year of +50% complete VR, or 200 cause-years of verbal autopsy |
| Meghālaya, Urban      | 5-24 years of +95% complete vital registration                           |
| Mizoram               | Less than 200 cause-years of verbal autopsy, or other data               |
| Mizoram, Rural        | Less than 200 cause-years of verbal autopsy, or other data               |
| Mizoram, Urban        | 1 or more years of +70% complete vital registration                      |
| Nāgāland              | Less than 200 cause-years of verbal autopsy, or other data               |
| Nāgāland, Rural       | Less than 200 cause-years of verbal autopsy, or other data               |
| Nāgāland, Urban       | Less than 200 cause-years of verbal autopsy, or other data               |
| Orissa                | 1 or more year of +50% complete VR, or 200 cause-years of verbal autopsy |
| Orissa, Rural         | 1 or more year of +50% complete VR, or 200 cause-years of verbal autopsy |
| Orissa, Urban         | 1 or more year of +50% complete VR, or 200 cause-years of verbal autopsy |
| Punjab                | 1 or more year of +50% complete VR, or 200 cause-years of verbal autopsy |
| Punjab, Rural         | 1 or more year of +50% complete VR, or 200 cause-years of verbal autopsy |
| Punjab, Urban         | Less than 200 cause-years of verbal autopsy, or other data               |
| Rājasthān             | 1 or more year of +50% complete VR, or 200 cause-years of verbal autopsy |
| Rājasthān, Rural      | 1 or more year of +50% complete VR, or 200 cause-years of verbal autopsy |
| Rājasthān, Urban      | Less than 200 cause-years of verbal autopsy, or other data               |
| Sikkim                | Less than 200 cause-years of verbal autopsy, or other data               |
| Sikkim, Rural         | Less than 200 cause-years of verbal autopsy, or other data               |

**Appendix Table 22: Classification of each geography into six data availability categories**

| Location                         | Completeness Group                                                       |
|----------------------------------|--------------------------------------------------------------------------|
| Sikkim, Urban                    | 25+ years of +95% complete vital registration                            |
| Tamil Nādu                       | 1 or more year of +50% complete VR, or 200 cause-years of verbal autopsy |
| Tamil Nādu, Rural                | 1 or more year of +50% complete VR, or 200 cause-years of verbal autopsy |
| Tamil Nādu, Urban                | 1 or more year of +50% complete VR, or 200 cause-years of verbal autopsy |
| Telangana                        | 1 or more year of +50% complete VR, or 200 cause-years of verbal autopsy |
| Telangana, Rural                 | 1 or more year of +50% complete VR, or 200 cause-years of verbal autopsy |
| Telangana, Urban                 | No data                                                                  |
| Tripura                          | 1 or more year of +50% complete VR, or 200 cause-years of verbal autopsy |
| Tripura, Rural                   | 1 or more year of +50% complete VR, or 200 cause-years of verbal autopsy |
| Tripura, Urban                   | 5-24 years of +95% complete vital registration                           |
| Uttar Pradesh                    | 1 or more year of +50% complete VR, or 200 cause-years of verbal autopsy |
| Uttar Pradesh, Rural             | 1 or more year of +50% complete VR, or 200 cause-years of verbal autopsy |
| Uttar Pradesh, Urban             | Less than 200 cause-years of verbal autopsy, or other data               |
| Uttarakhand                      | Less than 200 cause-years of verbal autopsy, or other data               |
| Uttarakhand, Rural               | Less than 200 cause-years of verbal autopsy, or other data               |
| Uttarakhand, Urban               | Less than 200 cause-years of verbal autopsy, or other data               |
| West Bengal                      | 1 or more year of +50% complete VR, or 200 cause-years of verbal autopsy |
| West Bengal, Rural               | 1 or more year of +50% complete VR, or 200 cause-years of verbal autopsy |
| West Bengal, Urban               | Less than 200 cause-years of verbal autopsy, or other data               |
| The Six Minor Territories        | 1 or more year of +50% complete VR, or 200 cause-years of verbal autopsy |
| The Six Minor Territories, Rural | 1 or more year of +50% complete VR, or 200 cause-years of verbal autopsy |
| The Six Minor Territories, Urban | 1 or more years of +70% complete vital registration                      |
| Nepal                            | Less than 200 cause-years of verbal autopsy, or other data               |
| Pakistan                         | Less than 200 cause-years of verbal autopsy, or other data               |
| Angola                           | Less than 200 cause-years of verbal autopsy, or other data               |
| Central African Republic         | Less than 200 cause-years of verbal autopsy, or other data               |
| Congo                            | Less than 200 cause-years of verbal autopsy, or other data               |
| Democratic Republic of the Congo | Less than 200 cause-years of verbal autopsy, or other data               |
| Equatorial Guinea                | No data                                                                  |
| Gabon                            | Less than 200 cause-years of verbal autopsy, or other data               |

**Appendix Table 22: Classification of each geography into six data availability categories**

| Location        | Completeness Group                                                       |
|-----------------|--------------------------------------------------------------------------|
| Burundi         | Less than 200 cause-years of verbal autopsy, or other data               |
| Comoros         | Less than 200 cause-years of verbal autopsy, or other data               |
| Djibouti        | Less than 200 cause-years of verbal autopsy, or other data               |
| Eritrea         | Less than 200 cause-years of verbal autopsy, or other data               |
| Ethiopia        | 1 or more year of +50% complete VR, or 200 cause-years of verbal autopsy |
| Kenya           | Less than 200 cause-years of verbal autopsy, or other data               |
| Baringo         | Less than 200 cause-years of verbal autopsy, or other data               |
| Bomet           | Less than 200 cause-years of verbal autopsy, or other data               |
| Bungoma         | Less than 200 cause-years of verbal autopsy, or other data               |
| Busia           | Less than 200 cause-years of verbal autopsy, or other data               |
| Elgeyo-Marakwet | Less than 200 cause-years of verbal autopsy, or other data               |
| Embu            | Less than 200 cause-years of verbal autopsy, or other data               |
| Garissa         | Less than 200 cause-years of verbal autopsy, or other data               |
| HomaBay         | Less than 200 cause-years of verbal autopsy, or other data               |
| Isiolo          | Less than 200 cause-years of verbal autopsy, or other data               |
| Kajiado         | Less than 200 cause-years of verbal autopsy, or other data               |
| Kakamega        | Less than 200 cause-years of verbal autopsy, or other data               |
| Kericho         | Less than 200 cause-years of verbal autopsy, or other data               |
| Kiambu          | Less than 200 cause-years of verbal autopsy, or other data               |
| Kilifi          | Less than 200 cause-years of verbal autopsy, or other data               |
| Kirinyaga       | Less than 200 cause-years of verbal autopsy, or other data               |
| Kisii           | Less than 200 cause-years of verbal autopsy, or other data               |
| Kisumu          | Less than 200 cause-years of verbal autopsy, or other data               |
| Kitui           | Less than 200 cause-years of verbal autopsy, or other data               |
| Kwale           | Less than 200 cause-years of verbal autopsy, or other data               |
| Laikipia        | Less than 200 cause-years of verbal autopsy, or other data               |
| Lamu            | Less than 200 cause-years of verbal autopsy, or other data               |
| Machakos        | Less than 200 cause-years of verbal autopsy, or other data               |
| Makueni         | Less than 200 cause-years of verbal autopsy, or other data               |



**Appendix Table 22: Classification of each geography into six data availability categories**

| Location     | Completeness Group                                                       |
|--------------|--------------------------------------------------------------------------|
| Mandera      | Less than 200 cause-years of verbal autopsy, or other data               |
| Marsabit     | Less than 200 cause-years of verbal autopsy, or other data               |
| Meru         | Less than 200 cause-years of verbal autopsy, or other data               |
| Migori       | Less than 200 cause-years of verbal autopsy, or other data               |
| Mombasa      | Less than 200 cause-years of verbal autopsy, or other data               |
| Murang'a     | Less than 200 cause-years of verbal autopsy, or other data               |
| Nairobi      | 1 or more year of +50% complete VR, or 200 cause-years of verbal autopsy |
| Nakuru       | Less than 200 cause-years of verbal autopsy, or other data               |
| Nandi        | Less than 200 cause-years of verbal autopsy, or other data               |
| Narok        | Less than 200 cause-years of verbal autopsy, or other data               |
| Nyamira      | Less than 200 cause-years of verbal autopsy, or other data               |
| Nyandarua    | Less than 200 cause-years of verbal autopsy, or other data               |
| Nyeri        | Less than 200 cause-years of verbal autopsy, or other data               |
| Samburu      | Less than 200 cause-years of verbal autopsy, or other data               |
| Siaya        | Less than 200 cause-years of verbal autopsy, or other data               |
| TaitaTaveta  | Less than 200 cause-years of verbal autopsy, or other data               |
| TanaRiver    | Less than 200 cause-years of verbal autopsy, or other data               |
| TharakaNithi | Less than 200 cause-years of verbal autopsy, or other data               |
| TransNzoia   | Less than 200 cause-years of verbal autopsy, or other data               |
| Turkana      | Less than 200 cause-years of verbal autopsy, or other data               |
| UasinGishu   | Less than 200 cause-years of verbal autopsy, or other data               |
| Vihiga       | Less than 200 cause-years of verbal autopsy, or other data               |
| Wajir        | Less than 200 cause-years of verbal autopsy, or other data               |
| WestPokot    | Less than 200 cause-years of verbal autopsy, or other data               |
| Madagascar   | Less than 200 cause-years of verbal autopsy, or other data               |
| Malawi       | Less than 200 cause-years of verbal autopsy, or other data               |
| Mozambique   | Less than 200 cause-years of verbal autopsy, or other data               |
| Rwanda       | Less than 200 cause-years of verbal autopsy, or other data               |
| Somalia      | No data                                                                  |

**Appendix Table 22: Classification of each geography into six data availability categories**

| Location      | Completeness Group                                                       |
|---------------|--------------------------------------------------------------------------|
| South Sudan   | Less than 200 cause-years of verbal autopsy, or other data               |
| Tanzania      | 1 or more year of +50% complete VR, or 200 cause-years of verbal autopsy |
| Uganda        | Less than 200 cause-years of verbal autopsy, or other data               |
| Zambia        | Less than 200 cause-years of verbal autopsy, or other data               |
| Botswana      | Less than 200 cause-years of verbal autopsy, or other data               |
| Lesotho       | Less than 200 cause-years of verbal autopsy, or other data               |
| Namibia       | Less than 200 cause-years of verbal autopsy, or other data               |
| South Africa  | 5-24 years of +95% complete vital registration                           |
| Eastern Cape  | 1 or more years of +70% complete vital registration                      |
| Free State    | 5-24 years of +95% complete vital registration                           |
| Gauteng       | 5-24 years of +95% complete vital registration                           |
| KwaZulu-Natal | 1 or more years of +70% complete vital registration                      |
| Limpopo       | 5-24 years of +95% complete vital registration                           |
| Mpumalanga    | 5-24 years of +95% complete vital registration                           |
| North-West    | 5-24 years of +95% complete vital registration                           |
| Northern Cape | 5-24 years of +95% complete vital registration                           |
| Western Cape  | 5-24 years of +95% complete vital registration                           |
| Swaziland     | Less than 200 cause-years of verbal autopsy, or other data               |
| Zimbabwe      | 1 or more year of +50% complete VR, or 200 cause-years of verbal autopsy |
| Benin         | Less than 200 cause-years of verbal autopsy, or other data               |
| Burkina Faso  | Less than 200 cause-years of verbal autopsy, or other data               |
| Cameroon      | Less than 200 cause-years of verbal autopsy, or other data               |
| Cape Verde    | 1 or more years of +70% complete vital registration                      |
| Chad          | Less than 200 cause-years of verbal autopsy, or other data               |
| Cote d'Ivoire | Less than 200 cause-years of verbal autopsy, or other data               |
| The Gambia    | Less than 200 cause-years of verbal autopsy, or other data               |
| Ghana         | 1 or more year of +50% complete VR, or 200 cause-years of verbal autopsy |
| Guinea        | Less than 200 cause-years of verbal autopsy, or other data               |
| Guinea-Bissau | Less than 200 cause-years of verbal autopsy, or other data               |

**Appendix Table 22: Classification of each geography into six data availability categories**

| Location              | Completeness Group                                         |
|-----------------------|------------------------------------------------------------|
| Liberia               | Less than 200 cause-years of verbal autopsy, or other data |
| Mali                  | Less than 200 cause-years of verbal autopsy, or other data |
| Mauritania            | Less than 200 cause-years of verbal autopsy, or other data |
| Niger                 | Less than 200 cause-years of verbal autopsy, or other data |
| Nigeria               | Less than 200 cause-years of verbal autopsy, or other data |
| Sao Tome and Principe | 1 or more years of +70% complete vital registration        |
| Senegal               | Less than 200 cause-years of verbal autopsy, or other data |
| Sierra Leone          | Less than 200 cause-years of verbal autopsy, or other data |
| Togo                  | Less than 200 cause-years of verbal autopsy, or other data |

**Appendix Table 23: Under-5 and adult mortality data sources used in GBD 2015**

| Location       | Years     | Source                                            | VR/SRS/DSP | HH | CBH | SBH | SIBS |
|----------------|-----------|---------------------------------------------------|------------|----|-----|-----|------|
| Canada         | 1950-2012 | Vital Registration                                | x          |    |     |     |      |
| Canada         | 2012      | Vital Registration                                | x          |    |     |     |      |
| Greenland      | 1952-2013 | Vital Registration                                | x          |    |     |     |      |
| United States  | 1979      | WHO Mortality Database                            | x          |    |     |     |      |
| United States  | 1950-2013 | Vital Registration                                | x          |    |     |     |      |
| Australia      | 1950-2014 | Vital Registration                                | x          |    |     |     |      |
| Australia      | 2006      | Human Mortality Database                          | x          |    |     |     |      |
| New Zealand    | 2013      | Human Mortality Database                          | x          |    |     |     |      |
| New Zealand    | 1950-2013 | Vital Registration                                | x          |    |     |     |      |
| Brunei         | 1960      | Census                                            |            |    |     |     | x    |
| Brunei         | 1950-2013 | Vital Registration                                | x          |    |     |     |      |
| Brunei         | 1995      | Country Mortality Data 1980-1999                  | x          |    |     |     |      |
| Japan          | 1950      | WHO Mortality Database                            | x          |    |     |     |      |
| Japan          | 1950-2013 | Vital Registration                                | x          |    |     |     |      |
| Singapore      | 1955-2003 | WHO Mortality Database                            | x          |    |     |     |      |
| Singapore      | 1950-2014 | Vital Registration                                | x          |    |     |     |      |
| South Korea    | 1977-2013 | Vital Registration                                | x          |    |     |     |      |
| South Korea    | 1980      | Census                                            |            |    |     |     | x    |
| South Korea    | 1990      | Census                                            |            |    |     |     | x    |
| South Korea    | 1970      | Census                                            |            |    |     |     | x    |
| South Korea    | 1985      | Census                                            |            |    |     |     | x    |
| South Korea    | 1975      | Census                                            |            |    |     |     | x    |
| South Korea    | 1974      | World Fertility Survey (WFS)                      |            |    | x   |     | x    |
| Andorra        | 1950-2010 | Vital Registration                                | x          |    |     |     |      |
| Austria        | 1950-1954 | Human Mortality Database                          | x          |    |     |     |      |
| Austria        | 1950-2014 | Vital Registration                                | x          |    |     |     |      |
| Belgium        | 1950-1987 | Human Mortality Database                          | x          |    |     |     |      |
| Belgium        | 1970      | Census                                            |            |    |     |     | x    |
| Belgium        | 1950-2012 | Vital Registration                                | x          |    |     |     |      |
| Belgium        | 1961      | Census                                            |            |    |     |     | x    |
| Cyprus         | 1960      | Census                                            |            |    |     |     | x    |
| Cyprus         | 1974-2012 | Vital Registration                                | x          |    |     |     |      |
| Cyprus         | 1992      | Census                                            |            |    |     |     | x    |
| Cyprus         | 1973      | Cyprus Microcensus 1973                           |            |    |     |     | x    |
| Denmark        | 1950      | Human Mortality Database                          | x          |    |     |     |      |
| Denmark        | 1950-2012 | Vital Registration                                | x          |    |     |     |      |
| Finland        | 1951      | Human Mortality Database                          | x          |    |     |     |      |
| Finland        | 1950      | Human Mortality Database                          | x          |    |     |     |      |
| Finland        | 1950-2013 | Vital Registration                                | x          |    |     |     |      |
| France         | 1950-2011 | Vital Registration                                | x          |    |     |     |      |
| France         | 1951      | Human Mortality Database                          | x          |    |     |     |      |
| Germany        | 1956-2010 | Human Mortality Database                          | x          |    |     |     |      |
| Germany        | 1956-2013 | Vital Registration                                | x          |    |     |     |      |
| Greece         | 2013      | Human Mortality Database                          | x          |    |     |     |      |
| Greece         | 1956-1960 | WHO Mortality Database                            | x          |    |     |     |      |
| Greece         | 1951-2013 | Vital Registration                                | x          |    |     |     |      |
| Iceland        | 1950-2013 | Human Mortality Database                          | x          |    |     |     |      |
| Iceland        | 1950-2013 | Vital Registration                                | x          |    |     |     |      |
| Ireland        | 2014      | Human Mortality Database                          | x          |    |     |     |      |
| Ireland        | 2005      | WHO Mortality Database                            | x          |    |     |     |      |
| Ireland        | 1950-2014 | Vital Registration                                | x          |    |     |     |      |
| Ireland        | 2013      | Human Mortality Database                          | x          |    |     |     |      |
| Ireland        | 1950-2014 | Vital Registration                                | x          |    | x   |     |      |
| Ireland        | 2004      | WHO Mortality Database                            | x          |    |     |     |      |
| Israel         | 2014      | Human Mortality Database                          | x          |    |     |     |      |
| Israel         | 1950-2014 | Vital Registration                                | x          |    |     |     |      |
| Italy          | 1950-2012 | Vital Registration                                | x          |    |     |     |      |
| Italy          | 1950-2005 | Human Mortality Database                          | x          |    |     |     |      |
| Luxembourg     | 1955-1966 | WHO Mortality Database                            | x          |    |     |     |      |
| Luxembourg     | 1963-2014 | Human Mortality Database                          | x          |    |     |     |      |
| Luxembourg     | 1950-2014 | Vital Registration                                | x          |    |     |     |      |
| Malta          | 1950-2014 | Vital Registration                                | x          |    |     |     |      |
| Malta          | 1955-1966 | WHO Mortality Database                            | x          |    |     |     |      |
| Netherlands    | 1950-2013 | Vital Registration                                | x          |    |     |     |      |
| Norway         | 1950      | Human Mortality Database                          | x          |    |     |     |      |
| Norway         | 2014      | Human Mortality Database                          | x          |    |     |     |      |
| Norway         | 1950-2014 | Vital Registration                                | x          |    |     |     |      |
| Portugal       | 1950-2006 | Human Mortality Database                          | x          |    |     |     |      |
| Portugal       | 1980      | World Fertility Survey (WFS)                      |            |    | x   |     | x    |
| Portugal       | 1950-2013 | Vital Registration                                | x          |    |     |     |      |
| Spain          | 1950-2009 | Human Mortality Database                          | x          |    |     |     |      |
| Spain          | 1950-2013 | Vital Registration                                | x          |    |     |     |      |
| Sweden         | 1950-2014 | Vital Registration                                | x          |    |     |     |      |
| Sweden         | 1987-2013 | WHO Mortality Database                            | x          |    |     |     |      |
| Sweden         | 2014      | Human Mortality Database                          | x          |    |     |     |      |
| Sweden         | 1950      | Human Mortality Database                          | x          |    |     |     |      |
| Switzerland    | 1950      | Human Mortality Database                          | x          |    |     |     |      |
| Switzerland    | 1960      | Census                                            |            |    |     |     | x    |
| Switzerland    | 1950-2013 | Vital Registration                                | x          |    |     |     |      |
| United Kingdom | 1950-2010 | WHO Mortality Database                            | x          |    |     |     |      |
| United Kingdom | 2011      | United Kingdom All-Cause Mortality Data 1950-2012 | x          |    |     |     |      |
| United Kingdom | 1950-2012 | Vital Registration                                | x          |    |     |     |      |
| United Kingdom | 2012      | United Kingdom All-Cause Mortality Data 1950-2012 | x          |    |     |     |      |
| United Kingdom | 2000      | Human Mortality Database                          | x          |    |     |     |      |
| East Midlands  | 1981-2013 | Vital Registration                                | x          |    |     |     |      |

**Appendix Table 23: Under-5 and adult mortality data sources used in GBD 2015**

| Location                 | Years     | Source                                                               | VR/SRS/DSP | HH | CBH | SBH | SIBS |
|--------------------------|-----------|----------------------------------------------------------------------|------------|----|-----|-----|------|
| East Midlands            | 1981-2012 | United Kingdom All-Cause Mortality Data 1950-2012                    | x          |    |     |     |      |
| East of England          | 1981-2013 | Vital Registration                                                   | x          |    |     |     |      |
| East of England          | 1981-2012 | United Kingdom All-Cause Mortality Data 1950-2012                    | x          |    |     |     |      |
| Greater London           | 1981-2012 | United Kingdom All-Cause Mortality Data 1950-2012                    | x          |    |     |     |      |
| Greater London           | 1981-2013 | Vital Registration                                                   | x          |    |     |     |      |
| North East England       | 1981-2012 | United Kingdom All-Cause Mortality Data 1950-2012                    | x          |    |     |     |      |
| North East England       | 1981-2013 | Vital Registration                                                   | x          |    |     |     |      |
| North West England       | 1981-2012 | United Kingdom All-Cause Mortality Data 1950-2012                    | x          |    |     |     |      |
| North West England       | 1981-2013 | Vital Registration                                                   | x          |    |     |     |      |
| South East England       | 1981-2013 | Vital Registration                                                   | x          |    |     |     |      |
| South East England       | 1981-2012 | United Kingdom All-Cause Mortality Data 1950-2012                    | x          |    |     |     |      |
| South West England       | 1981-2012 | United Kingdom All-Cause Mortality Data 1950-2012                    | x          |    |     |     |      |
| South West England       | 1981-2013 | Vital Registration                                                   | x          |    |     |     |      |
| West Midlands            | 1981-2013 | Vital Registration                                                   | x          |    |     |     |      |
| West Midlands            | 1981-2012 | United Kingdom All-Cause Mortality Data 1950-2012                    | x          |    |     |     |      |
| Yorkshire and the Humber | 1981-2013 | Vital Registration                                                   | x          |    |     |     |      |
| Yorkshire and the Humber | 1981-2012 | United Kingdom All-Cause Mortality Data 1950-2012                    | x          |    |     |     |      |
| Northern Ireland         | 1950-2012 | United Kingdom All-Cause Mortality Data 1950-2012                    | x          |    |     |     |      |
| Northern Ireland         | 1950-2013 | Vital Registration                                                   | x          |    |     |     |      |
| Scotland                 | 1950-2012 | United Kingdom All-Cause Mortality Data 1950-2012                    | x          |    |     |     |      |
| Scotland                 | 1950-2013 | Vital Registration                                                   | x          |    |     |     |      |
| Wales                    | 1981-2013 | Vital Registration                                                   | x          |    |     |     |      |
| Wales                    | 1981-2012 | United Kingdom All-Cause Mortality Data 1950-2012                    | x          |    |     |     |      |
| Argentina                | 1991      | Census, International Integrated Public Use Microdata Series (IPUMS) |            |    |     |     | x    |
| Argentina                | 1980      | Census, International Integrated Public Use Microdata Series (IPUMS) |            |    |     |     | x    |
| Argentina                | 1950-2013 | Vital Registration                                                   | x          |    |     |     |      |
| Argentina                | 1970      | Census, International Integrated Public Use Microdata Series (IPUMS) |            |    |     |     | x    |
| Chile                    | 2002      | Census, International Integrated Public Use Microdata Series (IPUMS) |            |    |     |     | x    |
| Chile                    | 1970      | Census, International Integrated Public Use Microdata Series (IPUMS) |            |    |     |     | x    |
| Chile                    | 1992      | Census, International Integrated Public Use Microdata Series (IPUMS) |            |    |     |     | x    |
| Chile                    | 1950-2013 | Vital Registration                                                   | x          |    |     |     |      |
| Chile                    | 1954      | WHO Mortality Database                                               | x          |    |     |     |      |
| Chile                    | 1982      | Census, International Integrated Public Use Microdata Series (IPUMS) |            |    |     |     | x    |
| Uruguay                  | 1996      | Census, International Integrated Public Use Microdata Series (IPUMS) |            |    |     |     | x    |
| Uruguay                  | 1985      | Census, International Integrated Public Use Microdata Series (IPUMS) |            |    |     |     | x    |
| Uruguay                  | 1950-2013 | Vital Registration                                                   | x          |    |     |     |      |
| Uruguay                  | 2006      | Census, International Integrated Public Use Microdata Series (IPUMS) |            |    |     |     | x    |
| Uruguay                  | 1975      | Census, International Integrated Public Use Microdata Series (IPUMS) |            |    |     |     | x    |
| Uruguay                  | 2011      | Census                                                               |            |    |     |     | x    |
| Belarus                  | 1989      | Census                                                               |            |    |     |     | x    |
| Belarus                  | 2005      | Multiple Indicator Cluster Survey (MICS)                             |            |    |     |     | x    |
| Belarus                  | 1959-2014 | Human Mortality Database                                             | x          |    |     |     |      |
| Belarus                  | 1959-2014 | Vital Registration                                                   | x          |    |     |     |      |
| Estonia                  | 1989      | Census                                                               |            |    |     |     | x    |
| Estonia                  | 1959-2013 | Human Mortality Database                                             | x          |    |     |     |      |
| Estonia                  | 1959-2013 | Vital Registration                                                   | x          |    |     |     |      |
| Estonia                  | 1989-1993 | WHO Mortality Database                                               | x          |    |     |     |      |
| Latvia                   | 1989      | Census                                                               |            |    |     |     | x    |
| Latvia                   | 1991-1995 | WHO Mortality Database                                               | x          |    |     |     |      |
| Latvia                   | 1959-2013 | Human Mortality Database                                             | x          |    |     |     |      |
| Latvia                   | 1959-2013 | Vital Registration                                                   | x          |    |     |     |      |
| Lithuania                | 1959-2013 | Vital Registration                                                   | x          |    |     |     |      |
| Lithuania                | 1991      | WHO Mortality Database                                               | x          |    |     |     |      |
| Lithuania                | 1992      | WHO Mortality Database                                               | x          |    |     |     |      |
| Lithuania                | 1959-1984 | Human Mortality Database                                             | x          |    |     |     |      |
| Moldova                  | 2012      | Multiple Indicator Cluster Survey (MICS)                             |            |    |     | x   | x    |
| Moldova                  | 1997      | Reproductive Health Survey (RHS)                                     |            |    |     |     | x    |
| Moldova                  | 1981-2013 | Vital Registration                                                   | x          |    |     |     |      |
| Moldova                  | 2005      | Demographic and Health Survey (DHS)                                  |            |    |     | x   | x    |
| Moldova                  | 1989      | Census                                                               |            |    |     |     | x    |
| Russia                   | 1989-1998 | WHO Mortality Database                                               | x          |    |     |     |      |
| Russia                   | 1959-1979 | Human Mortality Database                                             | x          |    |     |     |      |
| Russia                   | 1989      | Census                                                               |            |    |     |     | x    |
| Russia                   | 1959-2014 | Vital Registration                                                   | x          |    |     |     |      |
| Ukraine                  | 2007      | Demographic and Health Survey (DHS)                                  |            |    |     | x   | x    |
| Ukraine                  | 2001      | Census                                                               |            |    |     |     | x    |
| Ukraine                  | 2005      | Multiple Indicator Cluster Survey (MICS)                             |            |    |     |     | x    |
| Ukraine                  | 1959-2013 | Human Mortality Database                                             | x          |    |     |     |      |
| Ukraine                  | 2012      | Multiple Indicator Cluster Survey (MICS)                             |            |    |     |     | x    |
| Ukraine                  | 1959-2013 | Vital Registration                                                   | x          |    |     |     |      |
| Ukraine                  | 1989      | Census                                                               |            |    |     |     | x    |
| Ukraine                  | 1999      | Reproductive Health Survey (RHS)                                     |            |    |     | x   |      |
| Albania                  | 2009      | Demographic and Health Survey (DHS)                                  |            |    |     | x   | x    |
| Albania                  | 2011      | Census                                                               |            |    |     |     | x    |
| Albania                  | 2005-2009 | WHO Mortality Database                                               | x          |    |     |     |      |
| Albania                  | 1950-2010 | Vital Registration                                                   | x          |    |     |     |      |
| Albania                  | 2005      | Multiple Indicator Cluster Survey (MICS)                             |            |    |     |     | x    |
| Albania                  | 2002      | Reproductive Health Survey (RHS)                                     |            |    |     | x   | x    |
| Albania                  | 2000      | Multiple Indicator Cluster Survey (MICS)                             |            |    |     |     | x    |
| Bosnia and Herzegovina   | 1985-2012 | Vital Registration                                                   | x          |    |     |     |      |
| Bosnia and Herzegovina   | 1985-1991 | WHO Mortality Database                                               | x          |    |     |     |      |
| Bulgaria                 | 1965      | Census                                                               |            |    |     |     | x    |
| Bulgaria                 | 1975      | Census                                                               |            |    |     |     | x    |
| Bulgaria                 | 1997      | Living Standards Measurement Study (LSMS)                            |            |    |     |     | x    |
| Bulgaria                 | 1950-2012 | Vital Registration                                                   | x          |    |     |     |      |

**Appendix Table 23: Under-5 and adult mortality data sources used in GBD 2015**

| Location       | Years     | Source                                                               | VR/SRS/DSP | HH | CBH | SBH | SIBS |
|----------------|-----------|----------------------------------------------------------------------|------------|----|-----|-----|------|
| Bulgaria       | 1950-1963 | Human Mortality Database                                             | x          |    |     |     |      |
| Bulgaria       | 1995      | Living Standards Measurement Study (LSMS)                            |            |    |     | x   |      |
| Croatia        | 1985-2013 | Vital Registration                                                   | x          |    |     |     |      |
| Czech Republic | 1950-2014 | Vital Registration                                                   | x          |    |     |     |      |
| Czech Republic | 1950-2014 | Human Mortality Database                                             | x          |    |     |     |      |
| Hungary        | 1960      | Census                                                               |            |    |     | x   |      |
| Hungary        | 1950-2013 | Vital Registration                                                   | x          |    |     |     |      |
| Hungary        | 1950-1954 | Human Mortality Database                                             | x          |    |     |     |      |
| Macedonia      | 1982-2012 | Vital Registration                                                   | x          |    |     |     |      |
| Macedonia      | 2005      | Multiple Indicator Cluster Survey (MICS)                             |            |    |     | x   |      |
| Macedonia      | 2011      | Multiple Indicator Cluster Survey (MICS)                             |            |    |     | x   |      |
| Macedonia      | 1982      | Country Mortality Data 1980-1999                                     | x          |    |     |     |      |
| Montenegro     | 1995-1999 | Country Mortality Data 1980-1999                                     | x          |    |     |     |      |
| Montenegro     | 1980      | Vital Registration                                                   |            | x  |     |     |      |
| Montenegro     | 1970      | Vital Registration                                                   |            | x  |     |     |      |
| Montenegro     | 1960-2012 | Vital Registration                                                   | x          |    |     |     |      |
| Montenegro     | 1960      | Vital Registration                                                   |            | x  |     |     |      |
| Montenegro     | 1990      | Vital Registration                                                   |            | x  |     |     |      |
| Montenegro     | 2013      | Multiple Indicator Cluster Survey (MICS)                             |            |    |     | x   |      |
| Montenegro     | 2005-2008 | WHO Mortality Database                                               | x          |    |     |     |      |
| Poland         | 1970      | World Fertility Survey (WFS)                                         |            |    |     | x   |      |
| Poland         | 1950-2013 | Vital Registration                                                   | x          |    |     |     |      |
| Poland         | 1958-1998 | Human Mortality Database                                             | x          |    |     |     |      |
| Romania        | 1959-1968 | WHO Mortality Database                                               | x          |    |     |     |      |
| Romania        | 1999      | Reproductive Health Survey (RHS)                                     |            |    | x   |     |      |
| Romania        | 1994      | Living Standards Measurement Study (LSMS)                            |            |    | x   | x   |      |
| Romania        | 1966      | Census                                                               |            |    |     | x   |      |
| Romania        | 1956-2012 | Vital Registration                                                   | x          |    |     |     |      |
| Romania        | 1977      | Census                                                               |            |    |     | x   |      |
| Romania        | 1992      | Census                                                               |            |    |     | x   |      |
| Serbia         | 1971      | Vital Registration                                                   |            | x  |     |     |      |
| Serbia         | 1991      | Vital Registration                                                   |            | x  |     |     |      |
| Serbia         | 2010      | Multiple Indicator Cluster Survey (MICS)                             |            |    |     | x   |      |
| Serbia         | 1953-2013 | Vital Registration                                                   | x          |    |     |     |      |
| Serbia         | 1961      | Vital Registration                                                   |            | x  |     |     |      |
| Serbia         | 1953      | Vital Registration                                                   |            | x  |     |     |      |
| Serbia         | 2014      | Multiple Indicator Cluster Survey (MICS)                             |            |    |     | x   |      |
| Serbia         | 1995      | Country Mortality Data 1980-1999                                     | x          |    |     |     |      |
| Serbia         | 1996      | Country Mortality Data 1980-1999                                     | x          |    |     |     |      |
| Slovakia       | 1950-2014 | Vital Registration                                                   | x          |    |     |     |      |
| Slovakia       | 1950-2011 | Human Mortality Database                                             | x          |    |     |     |      |
| Slovenia       | 1983-2014 | Human Mortality Database                                             | x          |    |     |     |      |
| Slovenia       | 1982      | Country Mortality Data 1980-1999                                     | x          |    |     |     |      |
| Slovenia       | 1982-2014 | Vital Registration                                                   | x          |    |     |     |      |
| Armenia        | 2010      | Demographic and Health Survey (DHS)                                  |            |    | x   | x   |      |
| Armenia        | 2005      | Demographic and Health Survey (DHS)                                  |            |    | x   | x   |      |
| Armenia        | 2001      | Census, International Integrated Public Use Microdata Series (IPUMS) |            |    |     | x   |      |
| Armenia        | 2000      | Demographic and Health Survey (DHS)                                  |            |    | x   | x   |      |
| Armenia        | 2011      | Census                                                               |            |    |     | x   |      |
| Armenia        | 1981-2012 | Vital Registration                                                   | x          |    |     |     |      |
| Azerbaijan     | 2000      | Multiple Indicator Cluster Survey (MICS)                             |            |    |     | x   |      |
| Azerbaijan     | 2002      | Reproductive Health Survey (RHS)                                     |            |    | x   |     |      |
| Azerbaijan     | 2001-2004 | WHO Mortality Database                                               | x          |    |     |     |      |
| Azerbaijan     | 2001      | Reproductive Health Survey (RHS)                                     |            |    | x   |     |      |
| Azerbaijan     | 2011      | National Demographic and Health Survey                               |            |    | x   | x   |      |
| Azerbaijan     | 2009      | Census                                                               |            |    |     | x   |      |
| Azerbaijan     | 2006      | Demographic and Health Survey (DHS)                                  |            |    | x   | x   |      |
| Azerbaijan     | 1981-2012 | Vital Registration                                                   | x          |    |     |     |      |
| Georgia        | 1999      | Reproductive Health Survey (RHS)                                     |            |    |     | x   |      |
| Georgia        | 1981-2014 | Vital Registration                                                   | x          |    |     |     |      |
| Georgia        | 2000      | Reproductive Health Survey (RHS)                                     |            |    | x   |     |      |
| Georgia        | 2010      | Reproductive Health Survey (RHS)                                     |            |    | x   |     |      |
| Georgia        | 2005      | Reproductive Health Survey (RHS)                                     |            |    | x   | x   |      |
| Georgia        | 2005      | Multiple Indicator Cluster Survey (MICS)                             |            |    |     | x   |      |
| Georgia        | 1983      | Country Mortality Data 1980-1999                                     | x          |    |     |     |      |
| Kazakhstan     | 2010      | Multiple Indicator Cluster Survey (MICS)                             |            |    |     | x   |      |
| Kazakhstan     | 1996      | Living Standards Measurement Study (LSMS)                            |            |    |     | x   |      |
| Kazakhstan     | 1989      | Census                                                               |            |    |     | x   |      |
| Kazakhstan     | 2007      | WHO Mortality Database                                               | x          |    |     |     |      |
| Kazakhstan     | 1981-2012 | Vital Registration                                                   | x          |    |     |     |      |
| Kazakhstan     | 1999      | Demographic and Health Survey (DHS)                                  |            |    | x   | x   |      |
| Kazakhstan     | 2009      | Census                                                               |            |    |     | x   |      |
| Kazakhstan     | 1995      | Demographic and Health Survey (DHS)                                  |            |    | x   | x   |      |
| Kazakhstan     | 2006      | Multiple Indicator Cluster Survey (MICS)                             |            |    |     | x   |      |
| Kazakhstan     | 1999      | Census                                                               |            |    |     | x   |      |
| Kyrgyzstan     | 1999      | Census, International Integrated Public Use Microdata Series (IPUMS) |            |    |     | x   |      |
| Kyrgyzstan     | 2009      | Census, International Integrated Public Use Microdata Series (IPUMS) |            |    |     | x   |      |
| Kyrgyzstan     | 2014      | Multiple Indicator Cluster Survey (MICS)                             |            |    | x   | x   |      |
| Kyrgyzstan     | 1997      | Demographic and Health Survey (DHS)                                  |            |    | x   | x   |      |
| Kyrgyzstan     | 2005      | Multiple Indicator Cluster Survey (MICS)                             |            |    |     | x   |      |
| Kyrgyzstan     | 1998      | Living Standards Measurement Study (LSMS)                            |            |    | x   |     |      |
| Kyrgyzstan     | 1993      | Living Standards Measurement Study (LSMS)                            |            |    |     | x   |      |
| Kyrgyzstan     | 1981-2013 | Vital Registration                                                   | x          |    |     |     |      |
| Kyrgyzstan     | 2012      | Demographic and Health Survey (DHS)                                  |            |    | x   | x   |      |
| Mongolia       | 2008      | Mongolia Reproductive Health Survey                                  |            |    |     | x   |      |

**Appendix Table 23: Under-5 and adult mortality data sources used in GBD 2015**

| Location     | Years     | Source                                                               | VR/SRS/DSP | HH | CBH | SBH | SIBS |
|--------------|-----------|----------------------------------------------------------------------|------------|----|-----|-----|------|
| Mongolia     | 2003      | Mongolia Reproductive Health Survey                                  |            |    |     | x   |      |
| Mongolia     | 2000      | Multiple Indicator Cluster Survey (MICS)                             |            |    |     |     | x    |
| Mongolia     | 1998      | Mongolia Reproductive Health Survey                                  |            |    | x   | x   |      |
| Mongolia     | 1989      | Census, International Integrated Public Use Microdata Series (IPUMS) |            |    |     |     | x    |
| Mongolia     | 1999-2005 | Statistical Yearbook                                                 | x          |    |     |     |      |
| Mongolia     | 1965-2010 | Vital Registration                                                   | x          |    |     |     |      |
| Mongolia     | 2005      | Multiple Indicator Cluster Survey (MICS)                             |            |    |     |     | x    |
| Mongolia     | 2013      | Multiple Indicator Cluster Survey (MICS)                             |            |    | x   |     |      |
| Mongolia     | 2010      | Multiple Indicator Cluster Survey (MICS)                             |            |    |     |     | x    |
| Tajikistan   | 2012      | Demographic and Health Survey (DHS)                                  |            |    | x   | x   |      |
| Tajikistan   | 1989      | Census                                                               |            |    |     |     | x    |
| Tajikistan   | 2003      | Living Standards Measurement Study (LSMS)                            |            |    |     |     | x    |
| Tajikistan   | 1981-2012 | Vital Registration                                                   | x          |    |     |     |      |
| Tajikistan   | 1999      | Living Standards Measurement Study (LSMS)                            |            |    |     |     | x    |
| Tajikistan   | 2007      | Living Standards Measurement Study (LSMS)                            |            |    |     |     | x    |
| Tajikistan   | 2010      | Tajikistan Survey on Infant, Child, and Maternal Mortality 2010      |            |    | x   |     |      |
| Tajikistan   | 2000      | Multiple Indicator Cluster Survey (MICS)                             |            |    |     |     | x    |
| Tajikistan   | 2005      | Multiple Indicator Cluster Survey (MICS)                             |            |    |     |     | x    |
| Turkmenistan | 2000      | Demographic and Health Survey (DHS)                                  |            |    | x   | x   |      |
| Turkmenistan | 1981-2013 | Vital Registration                                                   | x          |    |     |     |      |
| Uzbekistan   | 2006      | Multiple Indicator Cluster Survey (MICS)                             |            |    |     |     | x    |
| Uzbekistan   | 1996      | Demographic and Health Survey (DHS)                                  |            |    | x   | x   |      |
| Uzbekistan   | 1981-2008 | Vital Registration                                                   | x          |    |     |     |      |
| Uzbekistan   | 2002      | Special Demographic and Health Survey (DHS)                          |            |    | x   | x   |      |
| Uzbekistan   | 2000      | Multiple Indicator Cluster Survey (MICS)                             |            |    |     |     | x    |
| Colombia     | 1973      | Census, International Integrated Public Use Microdata Series (IPUMS) |            |    |     |     | x    |
| Colombia     | 1990      | Demographic and Health Survey (DHS)                                  |            |    | x   | x   |      |
| Colombia     | 1950-2012 | Vital Registration                                                   | x          |    |     |     |      |
| Colombia     | 1993      | Census, International Integrated Public Use Microdata Series (IPUMS) |            |    |     |     | x    |
| Colombia     | 2000      | Demographic and Health Survey (DHS)                                  |            |    | x   | x   |      |
| Colombia     | 1976      | World Fertility Survey (WFS)                                         |            |    | x   | x   |      |
| Colombia     | 1985      | Census, International Integrated Public Use Microdata Series (IPUMS) |            |    |     |     | x    |
| Colombia     | 2005      | Census, International Integrated Public Use Microdata Series (IPUMS) |            |    |     |     | x    |
| Colombia     | 1995      | Demographic and Health Survey (DHS)                                  |            |    | x   | x   |      |
| Colombia     | 2010      | Demographic and Health Survey (DHS)                                  |            |    | x   | x   |      |
| Colombia     | 2005      | Demographic and Health Survey (DHS)                                  |            |    | x   | x   |      |
| Colombia     | 1970-2009 | WHO Mortality Database                                               | x          |    |     |     |      |
| Colombia     | 1986      | Demographic and Health Survey (DHS)                                  |            |    | x   | x   |      |
| Costa Rica   | 1986      | Reproductive Health Survey (RHS)                                     |            |    | x   | x   |      |
| Costa Rica   | 1976      | World Fertility Survey (WFS)                                         |            |    | x   | x   |      |
| Costa Rica   | 1981      | Westinghouse Contraceptive Prevalence Survey (CPS)                   |            |    |     |     | x    |
| Costa Rica   | 1992      | Reproductive Health Survey (RHS)                                     |            |    |     |     | x    |
| Costa Rica   | 1993      | Reproductive Health Survey (RHS)                                     |            |    | x   |     |      |
| Costa Rica   | 1956-1996 | WHO Mortality Database                                               | x          |    |     |     |      |
| Costa Rica   | 1950-2013 | Vital Registration                                                   | x          |    |     |     |      |
| Costa Rica   | 1984      | Census, International Integrated Public Use Microdata Series (IPUMS) |            |    |     |     | x    |
| Costa Rica   | 2000      | Census, International Integrated Public Use Microdata Series (IPUMS) |            |    |     |     | x    |
| Costa Rica   | 1973      | Census, International Integrated Public Use Microdata Series (IPUMS) |            |    |     |     | x    |
| El Salvador  | 1985      | Demographic and Health Survey (DHS)                                  |            |    | x   | x   |      |
| El Salvador  | 1971      | Census                                                               |            |    |     |     | x    |
| El Salvador  | 1998      | Reproductive Health Survey (RHS)                                     |            |    | x   | x   | x    |
| El Salvador  | 2006      | Census, International Integrated Public Use Microdata Series (IPUMS) |            | x  |     |     |      |
| El Salvador  | 1993      | Reproductive Health Survey (RHS)                                     |            |    | x   | x   | x    |
| El Salvador  | 2007      | Census, International Integrated Public Use Microdata Series (IPUMS) |            |    |     |     | x    |
| El Salvador  | 1992      | Census, International Integrated Public Use Microdata Series (IPUMS) |            |    |     |     | x    |
| El Salvador  | 1950-2012 | Vital Registration                                                   | x          | x  |     |     |      |
| El Salvador  | 2014      | Multiple Indicator Cluster Survey (MICS)                             |            |    | x   |     |      |
| El Salvador  | 1950-2012 | Vital Registration                                                   | x          |    |     |     |      |
| El Salvador  | 2003      | Reproductive Health Survey (RHS)                                     |            |    | x   | x   | x    |
| El Salvador  | 1981-1996 | WHO Mortality Database                                               | x          |    |     |     |      |
| El Salvador  | 1988      | Reproductive Health Survey (RHS)                                     |            |    |     |     | x    |
| El Salvador  | 2008      | Reproductive Health Survey (RHS)                                     |            |    | x   | x   |      |
| Guatemala    | 1999      | Interim Demographic and Health Survey (DHS)                          |            |    | x   | x   |      |
| Guatemala    | 1950-2013 | Vital Registration                                                   | x          |    |     |     |      |
| Guatemala    | 1987      | Demographic and Health Survey (DHS)                                  |            |    | x   | x   |      |
| Guatemala    | 2000      | Living Standards Measurement Study (LSMS)                            |            |    |     |     | x    |
| Guatemala    | 2002      | Reproductive Health Survey (RHS)                                     |            |    | x   | x   |      |
| Guatemala    | 1958-1999 | WHO Mortality Database                                               | x          |    |     |     |      |
| Guatemala    | 1995      | Demographic and Health Survey (DHS)                                  |            |    | x   | x   | x    |
| Guatemala    | 1978      | Reproductive Health Survey (RHS)                                     |            |    |     |     | x    |
| Guatemala    | 1981      | Census                                                               |            |    |     |     | x    |
| Guatemala    | 2009      | Reproductive Health Survey (RHS)                                     |            |    | x   | x   |      |
| Guatemala    | 2015      | Demographic and Health Survey (DHS)                                  |            |    | x   |     |      |
| Honduras     | 1966-1990 | WHO Mortality Database                                               | x          |    |     |     |      |
| Honduras     | 2004      | Honduras Survey of Living Conditions 2004                            |            |    |     |     | x    |
| Honduras     | 1991      | Reproductive Health Survey (RHS)                                     |            |    |     |     | x    |
| Honduras     | 1992      | Reproductive Health Survey (RHS)                                     |            |    | x   |     |      |
| Honduras     | 1984      | Honduras National Survey of Maternal and Child Health 1984           |            |    |     |     | x    |
| Honduras     | 1996      | Reproductive Health Survey (RHS)                                     |            |    | x   | x   | x    |
| Honduras     | 2012      | Demographic and Health Survey (DHS)                                  |            |    | x   | x   |      |
| Honduras     | 1987      | Reproductive Health Survey (RHS)                                     |            |    | x   |     |      |
| Honduras     | 1971      | Demographic Survey                                                   |            | x  |     |     | x    |
| Honduras     | 2001      | Reproductive Health Survey (RHS)                                     |            |    | x   | x   |      |
| Honduras     | 2006      | Demographic and Health Survey (DHS)                                  |            |    | x   | x   |      |
| Honduras     | 2001      | Census                                                               |            |    |     |     | x    |

**Appendix Table 23: Under-5 and adult mortality data sources used in GBD 2015**

| Location  | Years     | Source                                                               | VR/SRS/DSP | HH | CBH | SBH | SIBS |
|-----------|-----------|----------------------------------------------------------------------|------------|----|-----|-----|------|
| Honduras  | 1983      | Demographic Survey                                                   |            |    |     | x   |      |
| Honduras  | 1950-2013 | Vital Registration                                                   | x          |    |     |     |      |
| Mexico    | 1979-2010 | WHO Mortality Database                                               | x          |    |     |     |      |
| Mexico    | 2009      | Mexico Household Income and Expenditure Survey (ENIGH)               |            |    |     | x   |      |
| Mexico    | 1950-2014 | Vital Registration                                                   | x          |    |     |     |      |
| Mexico    | 2010      | Census                                                               |            |    |     | x   |      |
| Mexico    | 1976      | World Fertility Survey (WFS)                                         |            |    |     | x   |      |
| Mexico    | 2010      | Mexico Household Income and Expenditure Survey (ENIGH)               |            |    |     | x   |      |
| Mexico    | 2006      | Mexico National Survey of Demographic Dynamics (ENADID)              |            |    |     | x   |      |
| Mexico    | 1987      | Demographic and Health Survey (DHS)                                  |            |    | x   | x   |      |
| Mexico    | 2009      | Mexico National Survey of Demographic Dynamics (ENADID)              |            |    |     | x   |      |
| Mexico    | 1992      | Mexico National Survey of Demographic Dynamics (ENADID)              |            |    | x   |     |      |
| Mexico    | 2015      | Mexico Intercensal Survey 2015                                       |            |    |     | x   |      |
| Mexico    | 2014      | Mexico National Survey of Demographic Dynamics (ENADID)              |            |    |     | x   |      |
| Mexico    | 1991      | Mexico National Survey of Demographic Dynamics (ENADID)              |            |    |     | x   |      |
| Mexico    | 1980      | Census                                                               |            |    |     | x   |      |
| Mexico    | 2000      | Census, International Integrated Public Use Microdata Series (IPUMS) |            |    |     | x   |      |
| Mexico    | 1977      | World Fertility Survey (WFS)                                         |            |    | x   |     |      |
| Mexico    | 2005      | Census                                                               |            |    |     | x   |      |
| Mexico    | 1990      | Census, International Integrated Public Use Microdata Series (IPUMS) |            |    |     | x   |      |
| Nicaragua | 2001      | Living Standards Measurement Study (LSMS)                            |            |    |     | x   |      |
| Nicaragua | 1993      | Reproductive Health Survey (RHS)                                     |            |    | x   |     |      |
| Nicaragua | 1950-2013 | Vital Registration                                                   | x          |    |     |     |      |
| Nicaragua | 2005      | Living Standards Measurement Study (LSMS)                            |            |    |     | x   |      |
| Nicaragua | 1998      | Demographic and Health Survey (DHS)                                  |            |    | x   | x   |      |
| Nicaragua | 2012      | National Demographic and Health Survey                               |            |    | x   | x   |      |
| Nicaragua | 2005      | Census, International Integrated Public Use Microdata Series (IPUMS) |            |    |     | x   |      |
| Nicaragua | 1995      | Census, International Integrated Public Use Microdata Series (IPUMS) |            |    |     | x   |      |
| Nicaragua | 1959-1996 | WHO Mortality Database                                               | x          |    |     |     |      |
| Nicaragua | 2001      | Demographic and Health Survey (DHS)                                  |            |    | x   | x   |      |
| Nicaragua | 1985      | Demographic Survey                                                   |            |    |     | x   |      |
| Nicaragua | 2006      | Reproductive Health Survey (RHS)                                     |            |    |     | x   |      |
| Nicaragua | 1992      | Reproductive Health Survey (RHS)                                     |            |    |     | x   | x    |
| Nicaragua | 1971      | Census, International Integrated Public Use Microdata Series (IPUMS) |            |    |     | x   |      |
| Nicaragua | 2007      | Reproductive Health Survey (RHS)                                     |            |    | x   |     |      |
| Nicaragua | 1993      | Living Standards Measurement Study (LSMS)                            |            |    |     | x   |      |
| Panama    | 1950-2013 | Vital Registration                                                   | x          |    |     |     |      |
| Panama    | 1990      | Census, International Integrated Public Use Microdata Series (IPUMS) |            |    |     | x   |      |
| Panama    | 2000      | Census, International Integrated Public Use Microdata Series (IPUMS) |            |    |     | x   |      |
| Panama    | 1997      | Living Standards Measurement Study (LSMS)                            |            |    |     | x   |      |
| Panama    | 1980      | Census, International Integrated Public Use Microdata Series (IPUMS) |            |    |     | x   |      |
| Panama    | 1976      | World Fertility Survey (WFS)                                         |            |    | x   | x   |      |
| Panama    | 2010      | Census, International Integrated Public Use Microdata Series (IPUMS) |            |    |     | x   |      |
| Panama    | 2003      | Living Standards Measurement Study (LSMS)                            |            |    |     | x   |      |
| Panama    | 1960      | Census, International Integrated Public Use Microdata Series (IPUMS) |            |    |     | x   |      |
| Panama    | 1954-1997 | WHO Mortality Database                                               | x          |    |     |     |      |
| Venezuela | 1998      | Venezuela Population and Family Survey 1998                          |            |    | x   |     |      |
| Venezuela | 1977      | World Fertility Survey (WFS)                                         |            |    |     | x   |      |
| Venezuela | 1981      | Census, International Integrated Public Use Microdata Series (IPUMS) |            |    |     | x   |      |
| Venezuela | 1950-2012 | Vital Registration                                                   | x          |    |     |     |      |
| Venezuela | 1990      | Census, International Integrated Public Use Microdata Series (IPUMS) |            |    |     | x   |      |
| Venezuela | 1979-1994 | WHO Mortality Database                                               | x          |    |     |     |      |
| Venezuela | 2001      | Census, International Integrated Public Use Microdata Series (IPUMS) |            |    |     | x   |      |
| Bolivia   | 1980      | Demographic Survey                                                   |            |    |     | x   |      |
| Bolivia   | 2000      | Multiple Indicator Cluster Survey (MICS)                             |            |    |     | x   |      |
| Bolivia   | 2003      | Demographic and Health Survey (DHS)                                  |            |    |     | x   | x    |
| Bolivia   | 1994      | Demographic and Health Survey (DHS)                                  |            |    | x   | x   |      |
| Bolivia   | 1951-2003 | Vital Registration                                                   | x          |    |     |     |      |
| Bolivia   | 2000      | Bolivia Household Survey                                             |            |    |     | x   |      |
| Bolivia   | 1988      | Bolivia National Survey of Population and Housing 1988               |            |    |     | x   |      |
| Bolivia   | 2001      | Census, International Integrated Public Use Microdata Series (IPUMS) |            |    |     | x   |      |
| Bolivia   | 1989      | Demographic and Health Survey (DHS)                                  |            |    | x   | x   |      |
| Bolivia   | 2004      | Demographic and Health Survey (DHS)                                  |            |    | x   |     |      |
| Bolivia   | 2008      | Demographic and Health Survey (DHS)                                  |            |    | x   | x   | x    |
| Bolivia   | 1998      | Demographic and Health Survey (DHS)                                  |            |    | x   | x   |      |
| Bolivia   | 1993      | Demographic and Health Survey (DHS)                                  |            |    |     |     | x    |
| Bolivia   | 1976      | Census, International Integrated Public Use Microdata Series (IPUMS) |            |    |     | x   |      |
| Bolivia   | 1992      | Census, International Integrated Public Use Microdata Series (IPUMS) |            |    |     | x   |      |
| Ecuador   | 1987      | Demographic and Health Survey (DHS)                                  |            |    | x   | x   |      |
| Ecuador   | 2006      | Ecuador Living Conditions Survey 2005-2006                           |            |    |     | x   |      |
| Ecuador   | 1994      | Reproductive Health Survey (RHS)                                     |            |    | x   | x   | x    |
| Ecuador   | 2004      | Reproductive Health Survey (RHS)                                     |            |    | x   | x   | x    |
| Ecuador   | 2010      | Census                                                               |            |    |     | x   |      |
| Ecuador   | 1979-1995 | WHO Mortality Database                                               | x          |    |     |     |      |
| Ecuador   | 1974      | Census, International Integrated Public Use Microdata Series (IPUMS) |            |    |     | x   |      |
| Ecuador   | 1954-2013 | Vital Registration                                                   | x          |    |     |     |      |
| Ecuador   | 1995      | Living Standards Measurement Study (LSMS)                            |            |    |     | x   |      |
| Ecuador   | 2001      | Census, International Integrated Public Use Microdata Series (IPUMS) |            |    |     | x   |      |
| Ecuador   | 1979      | World Fertility Survey (WFS)                                         |            |    |     | x   |      |
| Ecuador   | 1999      | Reproductive Health Survey (RHS)                                     |            |    | x   | x   |      |
| Ecuador   | 1990      | Census, International Integrated Public Use Microdata Series (IPUMS) |            |    |     | x   |      |
| Ecuador   | 1989      | Reproductive Health Survey (RHS)                                     |            |    | x   | x   |      |
| Ecuador   | 2012      | Ecuador National Health and Nutrition Survey 2012                    |            |    | x   | x   |      |
| Ecuador   | 1999      | Ecuador Living Conditions Survey 1998-1999                           |            |    |     | x   |      |
| Ecuador   | 1982      | Census, International Integrated Public Use Microdata Series (IPUMS) |            |    |     | x   |      |



**Appendix Table 23: Under-5 and adult mortality data sources used in GBD 2015**

| Location            | Years     | Source                                                               | VR/SRS/DSP | HH | CBH | SBH | SIBS |
|---------------------|-----------|----------------------------------------------------------------------|------------|----|-----|-----|------|
| Ecuador             | 2010      | Census, International Integrated Public Use Microdata Series (IPUMS) |            |    |     | x   |      |
| Ecuador             | 1998      | Living Standards Measurement Study (LSMS)                            |            |    |     | x   |      |
| Peru                | 1993      | Census, International Integrated Public Use Microdata Series (IPUMS) |            |    |     | x   |      |
| Peru                | 1991      | Demographic and Health Survey (DHS)                                  |            |    |     |     | x    |
| Peru                | 2009      | Demographic and Health Survey (DHS)                                  |            |    | x   | x   | x    |
| Peru                | 1981      | Contraceptive Prevalence Survey                                      |            |    |     | x   |      |
| Peru                | 1978      | World Fertility Survey (WFS)                                         |            |    | x   |     |      |
| Peru                | 2012      | Demographic and Health Survey (DHS)                                  |            |    | x   | x   |      |
| Peru                | 1972      | Census                                                               |            |    |     | x   |      |
| Peru                | 1950-2013 | Vital Registration                                                   | x          |    |     |     |      |
| Peru                | 1992      | Demographic and Health Survey (DHS)                                  |            |    | x   | x   |      |
| Peru                | 1977      | World Fertility Survey (WFS)                                         |            |    |     | x   |      |
| Peru                | 1996      | Demographic and Health Survey (DHS)                                  |            |    | x   | x   | x    |
| Peru                | 2010      | Demographic and Health Survey (DHS)                                  |            |    | x   | x   |      |
| Peru                | 2003      | Demographic and Health Survey (DHS)                                  |            |    |     |     | x    |
| Peru                | 2008      | Demographic and Health Survey (DHS)                                  |            |    | x   |     |      |
| Peru                | 2000      | Demographic and Health Survey (DHS)                                  |            |    | x   | x   | x    |
| Peru                | 1981      | Census                                                               |            |    |     | x   |      |
| Peru                | 1986      | Demographic and Health Survey (DHS)                                  |            |    | x   | x   |      |
| Peru                | 2006      | Demographic and Health Survey (DHS)                                  |            |    |     | x   |      |
| Peru                | 2011      | Demographic and Health Survey (DHS)                                  |            |    | x   | x   |      |
| Peru                | 1986      | Living Standards Measurement Study (LSMS)                            |            |    |     | x   |      |
| Peru                | 2013      | Demographic and Health Survey (DHS)                                  |            |    | x   | x   |      |
| Peru                | 2014      | Demographic and Health Survey (DHS)                                  |            |    | x   | x   |      |
| Peru                | 1994      | Living Standards Measurement Study (LSMS)                            |            |    |     | x   |      |
| Peru                | 2007      | Census, International Integrated Public Use Microdata Series (IPUMS) |            |    |     |     | x    |
| Peru                | 1980-2005 | WHO Mortality Database                                               | x          |    |     |     |      |
| Antigua and Barbuda | 1983-1995 | WHO Mortality Database                                               | x          |    |     |     |      |
| Antigua and Barbuda | 1950-2013 | Vital Registration                                                   | x          |    |     |     |      |
| The Bahamas         | 1965-2012 | Vital Registration                                                   | x          |    |     |     |      |
| The Bahamas         | 1974-1998 | WHO Mortality Database                                               | x          |    |     |     |      |
| Barbados            | 1955-1995 | WHO Mortality Database                                               | x          |    |     |     |      |
| Barbados            | 1950-2012 | Vital Registration                                                   | x          |    |     |     |      |
| Belize              | 1950-2013 | Vital Registration                                                   | x          |    |     |     |      |
| Belize              | 2006      | Multiple Indicator Cluster Survey (MICS)                             |            |    |     | x   |      |
| Belize              | 2000      | Census                                                               |            |    |     | x   |      |
| Belize              | 1991      | Reproductive Health Survey (RHS)                                     |            |    | x   | x   |      |
| Belize              | 1980-1996 | WHO Mortality Database                                               | x          |    |     |     |      |
| Belize              | 1999      | Reproductive Health Survey (RHS)                                     |            |    | x   | x   |      |
| Belize              | 1991      | Census                                                               |            |    |     | x   |      |
| Belize              | 2011      | Multiple Indicator Cluster Survey (MICS)                             |            |    |     | x   |      |
| Bermuda             | 1980-2000 | WHO Mortality Database                                               | x          |    |     |     |      |
| Bermuda             | 1950-2013 | Vital Registration                                                   | x          |    |     |     |      |
| Bermuda             | 1960      | Census                                                               |            |    |     | x   |      |
| Cuba                | 1959-2013 | Vital Registration                                                   | x          |    |     |     |      |
| Cuba                | 1966      | Mortality in Developing Countries: Tome I Data Bank                  | x          |    |     |     |      |
| Cuba                | 1981      | Census                                                               |            |    |     | x   |      |
| Cuba                | 1967      | Mortality in Developing Countries: Tome I Data Bank                  | x          |    |     |     |      |
| Cuba                | 1959-1996 | WHO Mortality Database                                               | x          |    |     |     |      |
| Dominica            | 1979-1999 | WHO Mortality Database                                               | x          |    |     |     |      |
| Dominica            | 1950-2013 | Vital Registration                                                   | x          |    |     |     |      |
| Dominican Republic  | 2010      | Census, International Integrated Public Use Microdata Series (IPUMS) |            |    |     | x   |      |
| Dominican Republic  | 2007      | Demographic and Health Survey (DHS)                                  |            |    | x   | x   | x    |
| Dominican Republic  | 1991      | Demographic and Health Survey (DHS)                                  |            |    | x   | x   |      |
| Dominican Republic  | 2006      | Dominican Republic National Multipurpose Household Survey            |            |    | x   |     |      |
| Dominican Republic  | 1996      | Demographic and Health Survey (DHS)                                  |            |    | x   | x   |      |
| Dominican Republic  | 2000      | Multiple Indicator Cluster Survey (MICS)                             |            |    |     | x   |      |
| Dominican Republic  | 2002      | Demographic and Health Survey (DHS)                                  |            |    | x   | x   | x    |
| Dominican Republic  | 2014      | Multiple Indicator Cluster Survey (MICS)                             |            |    | x   |     |      |
| Dominican Republic  | 1956-2002 | WHO Mortality Database                                               | x          |    |     |     |      |
| Dominican Republic  | 1986      | Demographic and Health Survey (DHS)                                  |            |    | x   | x   |      |
| Dominican Republic  | 1975      | World Fertility Survey (WFS)                                         |            |    |     | x   |      |
| Dominican Republic  | 1950-2012 | Vital Registration                                                   | x          |    |     |     |      |
| Dominican Republic  | 2002      | Census, International Integrated Public Use Microdata Series (IPUMS) |            |    |     | x   |      |
| Dominican Republic  | 1981      | Census, International Integrated Public Use Microdata Series (IPUMS) |            |    |     | x   |      |
| Dominican Republic  | 1980      | World Fertility Survey (WFS)                                         |            |    |     | x   |      |
| Dominican Republic  | 2013      | Demographic and Health Survey (DHS)                                  |            |    | x   | x   |      |
| Dominican Republic  | 1970      | Census, International Integrated Public Use Microdata Series (IPUMS) |            |    |     | x   |      |
| Grenada             | 1950-2013 | Vital Registration                                                   | x          |    |     |     |      |
| Grenada             | 1985-1996 | WHO Mortality Database                                               | x          |    |     |     |      |
| Guyana              | 2006      | Multiple Indicator Cluster Survey (MICS)                             |            |    |     | x   |      |
| Guyana              | 1993      | Living Standards Measurement Study (LSMS)                            |            |    |     | x   |      |
| Guyana              | 2005      | DHS AIDS Indicator Survey (AIS)                                      |            |    | x   | x   |      |
| Guyana              | 1975      | World Fertility Survey (WFS)                                         |            |    | x   | x   |      |
| Guyana              | 2000      | Multiple Indicator Cluster Survey (MICS)                             |            |    |     | x   |      |
| Guyana              | 1979-1997 | WHO Mortality Database                                               | x          |    |     |     |      |
| Guyana              | 2009      | Demographic and Health Survey (DHS)                                  |            |    | x   | x   |      |
| Guyana              | 2014      | Multiple Indicator Cluster Survey (MICS)                             |            |    | x   |     |      |
| Guyana              | 1950-2011 | Vital Registration                                                   | x          |    |     |     |      |
| Haiti               | 1994      | Demographic and Health Survey (DHS)                                  |            |    |     | x   |      |
| Haiti               | 2006      | Demographic and Health Survey (DHS)                                  |            |    | x   | x   |      |
| Haiti               | 2003      | Census, International Integrated Public Use Microdata Series (IPUMS) |            |    |     | x   |      |
| Haiti               | 1977      | World Fertility Survey (WFS)                                         |            |    | x   | x   |      |
| Haiti               | 2005      | Demographic and Health Survey (DHS)                                  |            |    |     |     | x    |
| Haiti               | 1982      | Census, International Integrated Public Use Microdata Series (IPUMS) |            |    |     | x   |      |

**Appendix Table 23: Under-5 and adult mortality data sources used in GBD 2015**

| Location                         | Years     | Source                                                                                   | VR/SRS/DSP | HH | CBH | SBH | SIBS |
|----------------------------------|-----------|------------------------------------------------------------------------------------------|------------|----|-----|-----|------|
| Haiti                            | 1987      | Haiti Mortality, Morbidity, and Utilization of Services Survey 1987                      |            |    | x   | x   |      |
| Haiti                            | 2008      | Haiti Global Fund Household Survey 2008                                                  |            |    | x   |     |      |
| Haiti                            | 2000      | Demographic and Health Survey (DHS)                                                      |            |    | x   | x   | x    |
| Haiti                            | 1995      | Demographic and Health Survey (DHS)                                                      |            |    | x   |     |      |
| Haiti                            | 2012      | Demographic and Health Survey (DHS)                                                      |            |    | x   | x   |      |
| Jamaica                          | 1980-1991 | WHO Mortality Database                                                                   | x          |    |     |     |      |
| Jamaica                          | 2008      | Reproductive Health Survey (RHS)                                                         |            |    | x   |     |      |
| Jamaica                          | 1975      | World Fertility Survey (WFS)                                                             |            |    |     | x   |      |
| Jamaica                          | 1982      | Census, International Integrated Public Use Microdata Series (IPUMS)                     |            |    |     | x   |      |
| Jamaica                          | 1999      | Multiple Indicator Cluster Survey (MICS)                                                 |            |    |     | x   |      |
| Jamaica                          | 2005      | Multiple Indicator Cluster Survey (MICS)                                                 |            |    |     | x   |      |
| Jamaica                          | 1976      | World Fertility Survey (WFS)                                                             |            |    | x   |     |      |
| Jamaica                          | 1950-2011 | Vital Registration                                                                       | x          |    |     |     |      |
| Jamaica                          | 2001      | Census, International Integrated Public Use Microdata Series (IPUMS)                     |            |    |     | x   |      |
| Jamaica                          | 1999      | Country Mortality Data 1980-1999                                                         | x          |    |     |     |      |
| Puerto Rico                      | 1950-2013 | Vital Registration                                                                       | x          |    |     |     |      |
| Puerto Rico                      | 1955-2013 | WHO Mortality Database                                                                   | x          |    |     |     |      |
| Puerto Rico                      | 1996      | Reproductive Health Survey (RHS)                                                         |            |    | x   | x   |      |
| Saint Lucia                      | 1979-2008 | WHO Mortality Database                                                                   | x          |    |     |     |      |
| Saint Lucia                      | 1950-2012 | Vital Registration                                                                       | x          |    |     |     |      |
| Saint Vincent and the Grenadines | 1950-2013 | Vital Registration                                                                       | x          |    |     |     |      |
| Saint Vincent and the Grenadines | 1982-1999 | WHO Mortality Database                                                                   | x          |    |     |     |      |
| Suriname                         | 1979-2007 | WHO Mortality Database                                                                   | x          |    |     |     |      |
| Suriname                         | 1950-2012 | Vital Registration                                                                       | x          |    |     |     |      |
| Suriname                         | 1999      | Multiple Indicator Cluster Survey (MICS)                                                 |            |    |     | x   |      |
| Suriname                         | 2006      | Multiple Indicator Cluster Survey (MICS)                                                 |            |    |     | x   |      |
| Trinidad and Tobago              | 1959-1998 | WHO Mortality Database                                                                   | x          |    |     |     |      |
| Trinidad and Tobago              | 2000      | Multiple Indicator Cluster Survey (MICS)                                                 |            |    |     | x   |      |
| Trinidad and Tobago              | 1977      | World Fertility Survey (WFS)                                                             |            |    | x   | x   |      |
| Trinidad and Tobago              | 2006      | Multiple Indicator Cluster Survey (MICS)                                                 |            |    |     | x   |      |
| Trinidad and Tobago              | 1950-2009 | Vital Registration                                                                       | x          |    |     |     |      |
| Trinidad and Tobago              | 1987      | Demographic and Health Survey (DHS)                                                      |            |    | x   | x   |      |
| Virgin Islands, U.S.             | 1950-2004 | Vital Registration                                                                       | x          |    |     |     |      |
| Virgin Islands, U.S.             | 1963-1980 | WHO Mortality Database                                                                   | x          |    |     |     |      |
| Brazil                           | 2007      | Demographic and Health Survey (DHS)                                                      |            |    |     | x   |      |
| Brazil                           | 1970      | Census, International Integrated Public Use Microdata Series (IPUMS)                     |            |    |     | x   |      |
| Brazil                           | 1981-2011 | WHO Mortality Database                                                                   | x          |    |     |     |      |
| Brazil                           | 1980      | Census, International Integrated Public Use Microdata Series (IPUMS)                     |            |    |     | x   |      |
| Brazil                           | 1996      | Demographic and Health Survey (DHS)                                                      |            |    | x   | x   | x    |
| Brazil                           | 2010      | Census, International Integrated Public Use Microdata Series (IPUMS)                     |            |    |     | x   |      |
| Brazil                           | 1991      | Census, International Integrated Public Use Microdata Series (IPUMS)                     |            |    |     | x   |      |
| Brazil                           | 1960      | Census, International Integrated Public Use Microdata Series (IPUMS)                     |            |    |     | x   |      |
| Brazil                           | 2010      | Census                                                                                   |            |    |     | x   |      |
| Brazil                           | 1992-2009 | Brazil National Household Sample Survey (PNAD)                                           |            |    |     | x   |      |
| Brazil                           | 1974-2013 | Vital Registration                                                                       | x          |    |     |     |      |
| Paraguay                         | 1996      | Reproductive Health Survey (RHS)                                                         |            |    | x   |     |      |
| Paraguay                         | 1990      | Demographic and Health Survey (DHS)                                                      |            |    | x   | x   |      |
| Paraguay                         | 1979      | World Fertility Survey (WFS)                                                             |            |    |     | x   |      |
| Paraguay                         | 2004      | Reproductive Health Survey (RHS)                                                         |            |    | x   | x   |      |
| Paraguay                         | 1982      | Census                                                                                   |            |    |     | x   |      |
| Paraguay                         | 1979-1995 | WHO Mortality Database                                                                   | x          |    |     |     |      |
| Paraguay                         | 2008      | Reproductive Health Survey (RHS)                                                         |            |    | x   | x   |      |
| Paraguay                         | 1972      | Census                                                                                   |            |    |     | x   |      |
| Paraguay                         | 1950-2013 | Vital Registration                                                                       | x          |    |     |     |      |
| Paraguay                         | 2000      | Paraguay Integrated Household Survey 2000-2001                                           |            |    |     | x   |      |
| Paraguay                         | 1995      | Reproductive Health Survey (RHS)                                                         |            |    |     | x   | x    |
| Paraguay                         | 1998      | Reproductive Health Survey (RHS)                                                         |            |    | x   |     |      |
| Paraguay                         | 1997      | Paraguay Integrated Household Survey 1997-1998                                           |            |    |     | x   |      |
| Paraguay                         | 1998      | Census                                                                                   |            |    |     | x   |      |
| China                            | 2008      | China Sample Survey on Population Changes 2008                                           |            |    | x   |     |      |
| China                            | 2000      | Statistical Yearbook                                                                     |            |    | x   |     |      |
| China                            | 1992      | China National Maternal and Child Health Surveillance System 2009                        | x          |    |     |     |      |
| China                            | 2006      | China Sample Survey on Population Changes 2006                                           |            |    | x   |     |      |
| China                            | 2001      | China Sample Survey on Population Changes 2001                                           |            |    | x   |     |      |
| China                            | 1974      | China Sample Survey on Population Changes 1986                                           | x          |    |     |     |      |
| China                            | 1991-2014 | China National Disease Surveillance Points (DSP)                                         | x          |    |     |     |      |
| China                            | 2008-2012 | China Mortality Registration and Reporting System                                        | x          |    |     |     |      |
| China                            | 2009      | China National Maternal and Child Health Surveillance System 2009                        | x          |    |     |     |      |
| China                            | 1996-2012 | China Maternal and Child Mortality Data                                                  |            |    | x   |     |      |
| China                            | 1998      | China Sample Survey on Population Changes 1998                                           |            |    | x   |     |      |
| China                            | 2009      | China Sample Survey on Population Changes 2009                                           |            |    | x   |     |      |
| China                            | 2002      | China Sample Survey on Population Changes 2002                                           |            |    | x   |     |      |
| China                            | 1997      | China Sample Survey on Population Changes 1997                                           |            |    | x   |     |      |
| China                            | 1989      | Vital Registration                                                                       |            |    | x   |     |      |
| China                            | 1981-2010 | Census                                                                                   | x          |    | x   |     |      |
| China                            | 1994      | China Sample Survey on Population Changes 1994                                           |            |    | x   |     |      |
| China                            | 1986      | China Sample Survey on Population Changes 1986                                           |            |    | x   |     |      |
| China                            | 1986      | China 1% Population Sample Survey                                                        |            |    | x   |     |      |
| China                            | 2013      | China National Maternal and Child Health Surveillance System Child Mortality 2013 - MCHS | x          |    |     |     |      |
| China                            | 2007      | China Sample Survey on Population Changes 2007                                           |            |    | x   |     |      |
| China                            | 2012      | China Maternal and Child Health Surveillance System 2012 - MCHS                          | x          |    |     |     |      |
| China                            | 2003      | China Sample Survey on Population Changes 2003                                           |            |    | x   |     |      |
| China                            | 1990      | Census, International Integrated Public Use Microdata Series (IPUMS)                     |            |    |     | x   |      |
| China                            | 1987      | China In-Depth Fertility Sample Survey 1987                                              |            |    | x   |     |      |
| China                            | 1999      | China Sample Survey on Population Changes 1999                                           |            |    | x   |     |      |

**Appendix Table 23: Under-5 and adult mortality data sources used in GBD 2015**

| Location    | Years     | Source                                                                                              | VR/SRS/DSP | HH | CBH | SBH | SIBS |
|-------------|-----------|-----------------------------------------------------------------------------------------------------|------------|----|-----|-----|------|
| China       | 1981-2010 | Census                                                                                              | x          |    |     |     |      |
| China       | 1991      | China Sample Survey on Child Mortality 1991                                                         |            | x  |     |     |      |
| China       | 1981-2010 | Census                                                                                              | x          | x  |     | x   |      |
| China       | 1996-2011 | China Maternal and Child Health Surveillance System Mortality and Covariates Table 1996-2012 - MCHS | x          |    |     |     |      |
| China       | 2000-2008 | China National Maternal and Child Health Surveillance System 2000-2010 - MCHS                       | x          |    |     |     |      |
| China       | 1974      | China Cancer Epidemiology Survey 1975                                                               |            | x  |     |     |      |
| China       | 2004      | China Sample Survey on Population Changes 2004                                                      |            | x  |     |     |      |
| China       | 1981-2010 | Census                                                                                              | x          |    |     | x   |      |
| China       | 1982      | Census, International Integrated Public Use Microdata Series (IPUMS)                                |            |    |     |     | x    |
| China       | 1986-2005 | China 1% Population Sample Survey                                                                   | x          | x  |     |     |      |
| China       | 1996      | China Sample Survey on Population Changes 1996                                                      |            | x  |     |     |      |
| North Korea | 2008      | Census                                                                                              | x          |    |     |     |      |
| North Korea | 2008      | Vital Registration                                                                                  |            | x  |     |     |      |
| Taiwan      | 1970-2010 | Human Mortality Database                                                                            | x          |    |     |     |      |
| Taiwan      | 1955-2012 | Vital Registration                                                                                  | x          |    |     |     |      |
| Taiwan      | 1955-1963 | WHO Mortality Database                                                                              | x          |    |     |     |      |
| Cambodia    | 2010      | Demographic and Health Survey (DHS)                                                                 |            |    |     | x   | x    |
| Cambodia    | 2014      | Demographic and Health Survey (DHS)                                                                 |            |    | x   | x   | x    |
| Cambodia    | 2000      | Demographic and Health Survey (DHS)                                                                 |            |    | x   | x   | x    |
| Cambodia    | 2005      | Demographic and Health Survey (DHS)                                                                 |            |    |     | x   | x    |
| Cambodia    | 1999      | Cambodia Socioeconomic Survey                                                                       |            |    |     | x   |      |
| Cambodia    | 1997      | Cambodia Socioeconomic Survey                                                                       |            |    |     | x   |      |
| Cambodia    | 2004      | Cambodia Socioeconomic Survey                                                                       |            |    |     | x   |      |
| Cambodia    | 2006      | Demographic and Health Survey (DHS)                                                                 |            |    | x   |     |      |
| Cambodia    | 2008      | Census, International Integrated Public Use Microdata Series (IPUMS)                                |            |    |     |     | x    |
| Cambodia    | 1998      | Census, International Integrated Public Use Microdata Series (IPUMS)                                |            |    |     |     | x    |
| Cambodia    | 1998      | Special Demographic and Health Survey (DHS)                                                         |            |    | x   | x   |      |
| Cambodia    | 2011      | Demographic and Health Survey (DHS)                                                                 |            |    | x   |     |      |
| Indonesia   | 1987      | Demographic and Health Survey (DHS)                                                                 |            |    | x   | x   |      |
| Indonesia   | 1990      | Census, International Integrated Public Use Microdata Series (IPUMS)                                |            |    |     |     | x    |
| Indonesia   | 2003      | Demographic and Health Survey (DHS)                                                                 |            |    | x   | x   |      |
| Indonesia   | 2000      | Family Life Survey (FLS)                                                                            |            |    | x   | x   |      |
| Indonesia   | 1997      | Family Life Survey (FLS)                                                                            |            |    | x   | x   |      |
| Indonesia   | 1993      | Family Life Survey (FLS)                                                                            |            |    | x   | x   |      |
| Indonesia   | 1976      | World Fertility Survey (WFS)                                                                        |            |    | x   | x   |      |
| Indonesia   | 1991      | Demographic and Health Survey (DHS)                                                                 |            |    | x   | x   |      |
| Indonesia   | 2007      | Demographic and Health Survey (DHS)                                                                 |            |    | x   | x   | x    |
| Indonesia   | 1971      | Census                                                                                              |            |    |     | x   |      |
| Indonesia   | 1997      | Demographic and Health Survey (DHS)                                                                 |            |    | x   | x   | x    |
| Indonesia   | 1992-2011 | Indonesia National Socioeconomic Survey (SUSENAS)                                                   |            |    |     |     | x    |
| Indonesia   | 2012      | Demographic and Health Survey (DHS)                                                                 |            |    | x   | x   | x    |
| Indonesia   | 2008      | Family Life Survey (FLS)                                                                            |            |    |     | x   |      |
| Indonesia   | 1964      | Census                                                                                              |            |    |     | x   |      |
| Indonesia   | 2007      | Family Life Survey (FLS)                                                                            |            |    | x   |     |      |
| Indonesia   | 1995      | Census, International Integrated Public Use Microdata Series (IPUMS)                                |            |    |     |     | x    |
| Indonesia   | 2000      | Census                                                                                              |            |    | x   |     |      |
| Indonesia   | 1980      | Census, International Integrated Public Use Microdata Series (IPUMS)                                |            |    |     |     | x    |
| Indonesia   | 1976      | Indonesia Intercensal Population Survey (SUPAS)                                                     |            |    | x   |     |      |
| Indonesia   | 2010      | Census                                                                                              |            |    |     | x   |      |
| Indonesia   | 2005      | Indonesia Intercensal Population Survey (SUPAS)                                                     |            |    | x   |     |      |
| Indonesia   | 2002      | Demographic and Health Survey (DHS)                                                                 |            |    |     |     | x    |
| Indonesia   | 1985      | Indonesia Intercensal Population Survey (SUPAS)                                                     |            |    |     | x   |      |
| Indonesia   | 1995      | Indonesia Intercensal Population Survey (SUPAS)                                                     |            |    |     | x   |      |
| Indonesia   | 1994      | Demographic and Health Survey (DHS)                                                                 |            |    | x   | x   | x    |
| Indonesia   | 2000      | Census, International Integrated Public Use Microdata Series (IPUMS)                                |            |    |     |     | x    |
| Indonesia   | 2010      | Census, International Integrated Public Use Microdata Series (IPUMS)                                |            |    |     |     | x    |
| Indonesia   | 1995      | SUPAS, International Integrated Public Use Microdata Series (IPUMS)                                 |            |    | x   |     |      |
| Laos        | 2005      | Laos Reproductive Health Survey                                                                     |            |    | x   | x   |      |
| Laos        | 1995      | Census                                                                                              |            |    |     | x   |      |
| Laos        | 2012      | Multiple Indicator Cluster Survey (MICS)                                                            |            |    |     |     | x    |
| Laos        | 2011      | Multiple Indicator Cluster Survey (MICS)                                                            |            |    | x   | x   |      |
| Malaysia    | 1970      | Census, International Integrated Public Use Microdata Series (IPUMS)                                |            |    |     |     | x    |
| Malaysia    | 1980      | Census, International Integrated Public Use Microdata Series (IPUMS)                                |            |    |     |     | x    |
| Malaysia    | 1952-2009 | Vital Registration                                                                                  | x          |    |     |     |      |
| Malaysia    | 1974      | World Fertility Survey (WFS)                                                                        |            |    | x   | x   |      |
| Maldives    | 1985      | Census                                                                                              |            |    |     |     | x    |
| Maldives    | 2000      | Census                                                                                              |            |    |     |     | x    |
| Maldives    | 1998      | Maldives Vulnerability and Poverty Assessment 1997-1998                                             |            |    |     |     | x    |
| Maldives    | 1990      | Census                                                                                              |            |    |     |     | x    |
| Maldives    | 1977      | Census                                                                                              |            |    |     |     | x    |
| Maldives    | 2009      | Demographic and Health Survey (DHS)                                                                 |            |    | x   | x   |      |
| Maldives    | 1974-2011 | Vital Registration                                                                                  | x          |    |     |     |      |
| Mauritius   | 1957-1990 | WHO Mortality Database                                                                              | x          |    |     |     |      |
| Mauritius   | 1950-2014 | Vital Registration                                                                                  | x          |    |     |     |      |
| Myanmar     | 1983      | Census                                                                                              |            |    |     |     | x    |
| Myanmar     | 2007      | Myanmar Fertility and Reproductive Health Survey 2006-2007                                          |            |    |     |     | x    |
| Myanmar     | 2014      | Census                                                                                              |            |    |     |     | x    |
| Myanmar     | 2010      | Multiple Indicator Cluster Survey (MICS)                                                            |            |    | x   |     |      |
| Myanmar     | 1997      | Myanmar Fertility and Reproductive Health Survey 1997                                               |            |    |     |     | x    |
| Myanmar     | 2005      | Vital Registration                                                                                  | x          |    |     |     |      |
| Myanmar     | 2001      | Myanmar Fertility and Reproductive Health Survey 2001                                               |            |    |     |     | x    |
| Philippines | 1958      | Philippines Statistical Survey of Private Households 1958                                           |            |    |     |     | x    |
| Philippines | 1950-2012 | Vital Registration                                                                                  | x          |    |     |     |      |
| Philippines | 1980      | Census                                                                                              |            |    |     |     | x    |
| Philippines | 2008      | Demographic and Health Survey (DHS)                                                                 |            |    | x   | x   |      |

**Appendix Table 23: Under-5 and adult mortality data sources used in GBD 2015**

| Location                       | Years     | Source                                                               | VR/SRS/DSP | HH | CBH | SBH | SIBS |
|--------------------------------|-----------|----------------------------------------------------------------------|------------|----|-----|-----|------|
| Philippines                    | 1978      | World Fertility Survey (WFS)                                         |            |    | x   | x   |      |
| Philippines                    | 2011      | National Demographic and Health Survey                               |            |    |     | x   |      |
| Philippines                    | 1970      | Census                                                               |            |    |     | x   |      |
| Philippines                    | 1981      | WHO Mortality Database                                               | x          |    |     |     |      |
| Philippines                    | 1998      | Demographic and Health Survey (DHS)                                  |            |    | x   | x   | x    |
| Philippines                    | 1993      | Demographic and Health Survey (DHS)                                  |            |    | x   | x   | x    |
| Philippines                    | 2003      | Demographic and Health Survey (DHS)                                  |            |    | x   | x   |      |
| Philippines                    | 1990      | Census, International Integrated Public Use Microdata Series (IPUMS) |            |    |     | x   |      |
| Philippines                    | 2013      | Demographic and Health Survey (DHS)                                  |            |    | x   | x   |      |
| Sri Lanka                      | 1975      | World Fertility Survey (WFS)                                         |            |    | x   | x   |      |
| Sri Lanka                      | 2001      | Census                                                               |            |    |     | x   |      |
| Sri Lanka                      | 2007      | Demographic and Health Survey (DHS)                                  |            |    | x   |     |      |
| Sri Lanka                      | 1993      | National Demographic and Health Survey                               |            |    | x   | x   |      |
| Sri Lanka                      | 1987      | Demographic and Health Survey (DHS)                                  |            |    | x   | x   |      |
| Sri Lanka                      | 1950-2010 | Vital Registration                                                   | x          |    |     |     |      |
| Sri Lanka                      | 2000      | National Demographic and Health Survey                               |            |    | x   |     |      |
| Sri Lanka                      | 1971      | Census                                                               |            |    |     | x   |      |
| Sri Lanka                      | 1977      | WHO Mortality Database                                               | x          |    |     |     |      |
| Seychelles                     | 1971      | Census                                                               |            |    |     | x   |      |
| Seychelles                     | 2006      | WHO Mortality Database                                               | x          |    |     |     |      |
| Seychelles                     | 2005      | WHO Mortality Database                                               | x          |    |     |     |      |
| Seychelles                     | 1960      | Census                                                               |            | x  |     | x   |      |
| Seychelles                     | 1952-2012 | Vital Registration                                                   | x          |    |     |     |      |
| Thailand                       | 1990      | Census, International Integrated Public Use Microdata Series (IPUMS) |            |    |     | x   |      |
| Thailand                       | 1970      | Census, International Integrated Public Use Microdata Series (IPUMS) |            |    |     | x   |      |
| Thailand                       | 2000      | Census, International Integrated Public Use Microdata Series (IPUMS) |            |    |     | x   |      |
| Thailand                       | 1975      | World Fertility Survey (WFS)                                         |            |    | x   | x   |      |
| Thailand                       | 2012      | Multiple Indicator Cluster Survey (MICS)                             |            |    |     | x   |      |
| Thailand                       | 2006      | Multiple Indicator Cluster Survey (MICS)                             |            |    |     | x   |      |
| Thailand                       | 1984      | Thailand Contraception Prevalence Survey 1984                        |            |    |     | x   |      |
| Thailand                       | 1980      | Census, International Integrated Public Use Microdata Series (IPUMS) |            |    |     | x   |      |
| Thailand                       | 1955-1991 | WHO Mortality Database                                               | x          |    |     |     |      |
| Thailand                       | 1981      | Thailand Contraception Prevalence Survey 1981                        |            |    |     | x   |      |
| Thailand                       | 1987      | Demographic and Health Survey (DHS)                                  |            |    | x   | x   |      |
| Thailand                       | 1950-2011 | Vital Registration                                                   | x          |    |     |     |      |
| Timor-Leste                    | 2004      | Census                                                               |            |    |     | x   |      |
| Timor-Leste                    | 2001      | Living Standards Measurement Study (LSMS)                            |            |    |     | x   |      |
| Timor-Leste                    | 2009      | Demographic and Health Survey (DHS)                                  |            |    |     | x   | x    |
| Timor-Leste                    | 1997      | Demographic and Health Survey (DHS)                                  |            |    | x   | x   |      |
| Timor-Leste                    | 1991      | Demographic and Health Survey (DHS)                                  |            |    | x   | x   |      |
| Timor-Leste                    | 1994      | Demographic and Health Survey (DHS)                                  |            |    | x   | x   |      |
| Timor-Leste                    | 2003      | National Demographic and Health Survey                               |            |    | x   | x   |      |
| Timor-Leste                    | 2010      | Demographic and Health Survey (DHS)                                  |            |    | x   |     |      |
| Vietnam                        | 2009      | Census, International Integrated Public Use Microdata Series (IPUMS) |            |    |     | x   |      |
| Vietnam                        | 2002      | Demographic and Health Survey (DHS)                                  |            |    | x   | x   |      |
| Vietnam                        | 1989      | Census, International Integrated Public Use Microdata Series (IPUMS) |            | x  |     | x   |      |
| Vietnam                        | 2014      | Multiple Indicator Cluster Survey (MICS)                             |            |    |     | x   |      |
| Vietnam                        | 2011      | Vietnam Population Change and Family Planning Survey                 |            |    |     | x   |      |
| Vietnam                        | 2010      | Haiti Global Fund Household Survey 2008                              |            |    |     | x   |      |
| Vietnam                        | 2013      | Multiple Indicator Cluster Survey (MICS)                             |            |    | x   |     |      |
| Vietnam                        | 2006      | Multiple Indicator Cluster Survey (MICS)                             |            |    |     | x   |      |
| Vietnam                        | 2000      | Multiple Indicator Cluster Survey (MICS)                             |            |    |     | x   |      |
| Vietnam                        | 2007      | Vietnam Population Change and Family Planning Survey                 |            |    |     | x   |      |
| Vietnam                        | 2005      | DHS AIDS Indicator Survey (AIS)                                      |            |    |     | x   |      |
| Vietnam                        | 1999      | Census, International Integrated Public Use Microdata Series (IPUMS) |            | x  |     | x   |      |
| Vietnam                        | 2008      | Vietnam Population Change and Family Planning Survey                 |            |    |     | x   |      |
| Vietnam                        | 2013      | Vietnam Population Change and Family Planning Survey                 |            |    |     | x   |      |
| Vietnam                        | 1997      | Demographic and Health Survey (DHS)                                  |            |    | x   | x   |      |
| Vietnam                        | 2010      | Multiple Indicator Cluster Survey (MICS)                             |            |    |     | x   |      |
| American Samoa                 | 1952-2004 | Vital Registration                                                   | x          |    |     |     |      |
| Federated States of Micronesia | 1994      | Census                                                               |            |    |     | x   |      |
| Federated States of Micronesia | 2003      | Vital Registration                                                   | x          |    |     |     |      |
| Federated States of Micronesia | 1973      | Census                                                               |            |    |     | x   |      |
| Federated States of Micronesia | 2000      | Census                                                               |            |    |     | x   |      |
| Fiji                           | 1956      | Census                                                               |            |    |     | x   |      |
| Fiji                           | 2007      | Census, International Integrated Public Use Microdata Series (IPUMS) |            |    |     | x   |      |
| Fiji                           | 1986      | Census, International Integrated Public Use Microdata Series (IPUMS) |            |    |     | x   |      |
| Fiji                           | 1974      | World Fertility Survey (WFS)                                         |            |    | x   | x   |      |
| Fiji                           | 1966      | Census, International Integrated Public Use Microdata Series (IPUMS) |            |    |     | x   |      |
| Fiji                           | 1950-2012 | Vital Registration                                                   | x          |    |     |     |      |
| Fiji                           | 1976      | Census, International Integrated Public Use Microdata Series (IPUMS) |            |    |     | x   |      |
| Fiji                           | 1996      | Census, International Integrated Public Use Microdata Series (IPUMS) |            |    |     | x   |      |
| Guam                           | 1950-2004 | Vital Registration                                                   | x          |    |     |     |      |
| Kiribati                       | 1978      | Census                                                               |            |    |     | x   |      |
| Kiribati                       | 1968      | Census                                                               |            |    |     | x   |      |
| Kiribati                       | 1995-2001 | WHO Mortality Database                                               | x          |    |     |     |      |
| Kiribati                       | 1973      | Census                                                               |            |    |     | x   |      |
| Kiribati                       | 2010      | Census                                                               |            |    |     | x   |      |
| Kiribati                       | 2009      | Asian Development Bank Demographic and Health Survey (ADB DHS)       |            |    | x   | x   |      |
| Kiribati                       | 1991-2001 | Vital Registration                                                   | x          |    |     |     |      |
| Kiribati                       | 1963      | Census                                                               |            |    |     | x   |      |
| Kiribati                       | 2005      | Census                                                               |            |    |     | x   |      |
| Marshall Islands               | 1986-2006 | Vital Registration                                                   | x          |    |     |     |      |
| Marshall Islands               | 1999      | Census                                                               |            |    |     | x   |      |
| Marshall Islands               | 2011      | Census                                                               |            |    |     | x   |      |

**Appendix Table 23: Under-5 and adult mortality data sources used in GBD 2015**

| Location                 | Years     | Source                                                                  | VR/SRS/DSP | HH | CBH | SBH | SIBS |
|--------------------------|-----------|-------------------------------------------------------------------------|------------|----|-----|-----|------|
| Marshall Islands         | 2007      | Asian Development Bank Demographic and Health Survey (ADB DHS)          |            |    | x   |     |      |
| Northern Mariana Islands | 1989-2004 | Vital Registration                                                      | x          |    |     |     |      |
| Papua New Guinea         | 1980      | Vital Registration                                                      | x          |    |     |     |      |
| Papua New Guinea         | 1977      | Vital Registration                                                      | x          |    |     |     |      |
| Papua New Guinea         | 1980      | Census                                                                  |            |    |     | x   |      |
| Papua New Guinea         | 1997      | Asian Development Bank Demographic and Health Survey (ADB DHS)          |            |    | x   | x   |      |
| Papua New Guinea         | 2006      | Asian Development Bank Demographic and Health Survey (ADB DHS)          |            |    | x   |     |      |
| Papua New Guinea         | 1971      | Papua New Guinea Demography Monograph II                                |            |    |     | x   |      |
| Papua New Guinea         | 2000      | Census                                                                  |            |    |     | x   |      |
| Papua New Guinea         | 1991      | National Demographic and Health Survey                                  |            |    |     | x   |      |
| Samoa                    | 1956      | Census                                                                  |            |    |     | x   |      |
| Samoa                    | 2009      | Demographic and Health Survey (DHS)                                     |            |    | x   |     |      |
| Samoa                    | 1981      | Census                                                                  |            |    |     | x   |      |
| Samoa                    | 1966      | Census                                                                  |            |    |     | x   |      |
| Samoa                    | 2006      | Census                                                                  |            | x  |     |     |      |
| Samoa                    | 1976      | Census                                                                  |            |    |     | x   |      |
| Samoa                    | 2011      | Vital Registration                                                      |            | x  |     |     |      |
| Samoa                    | 1955-2011 | Vital Registration                                                      | x          |    |     |     |      |
| Samoa                    | 1961      | Census                                                                  |            |    |     | x   |      |
| Solomon Islands          | 1970      | Census                                                                  |            |    |     | x   |      |
| Solomon Islands          | 1976      | Census                                                                  |            |    |     | x   |      |
| Solomon Islands          | 2009      | Census                                                                  |            |    |     | x   |      |
| Solomon Islands          | 1999      | Census                                                                  |            |    |     | x   |      |
| Solomon Islands          | 2007      | Asian Development Bank Demographic and Health Survey (ADB DHS)          |            |    | x   |     |      |
| Tonga                    | 2012      | Asian Development Bank Demographic and Health Survey (ADB DHS)          |            |    | x   | x   |      |
| Tonga                    | 2006      | Vital Registration                                                      |            | x  |     |     |      |
| Tonga                    | 1986      | Census                                                                  |            |    |     | x   |      |
| Tonga                    | 1957-2006 | Vital Registration                                                      | x          |    |     |     |      |
| Tonga                    | 1976-2006 | Census                                                                  | x          |    |     |     |      |
| Tonga                    | 1976      | Census                                                                  |            |    |     | x   |      |
| Vanuatu                  | 2009      | Census                                                                  |            |    |     | x   |      |
| Vanuatu                  | 2007      | Multiple Indicator Cluster Survey (MICS)                                |            |    |     | x   |      |
| Vanuatu                  | 1967      | Census                                                                  |            |    |     | x   |      |
| Vanuatu                  | 2013      | Asian Development Bank Demographic and Health Survey (ADB DHS)          |            |    | x   | x   |      |
| Afghanistan              | 1979      | Vital Registration                                                      |            | x  |     |     |      |
| Afghanistan              | 2010      | Multiple Indicator Cluster Survey (MICS)                                |            |    |     | x   |      |
| Afghanistan              | 2012      | Afghanistan Living Conditions Survey                                    |            |    |     | x   |      |
| Afghanistan              | 2008      | Afghanistan Living Conditions Survey                                    |            |    |     | x   |      |
| Afghanistan              | 2000      | Multiple Indicator Cluster Survey (MICS)                                |            |    |     | x   |      |
| Afghanistan              | 2003      | Multiple Indicator Cluster Survey (MICS)                                |            |    |     | x   |      |
| Afghanistan              | 2006      | Afghanistan Health Survey 2006                                          |            |    |     | x   |      |
| Algeria                  | 2013      | Multiple Indicator Cluster Survey (MICS)                                |            |    | x   |     |      |
| Algeria                  | 2002      | Pan Arab Project for Family Health (PAPFAM)                             |            |    | x   | x   |      |
| Algeria                  | 2000      | Multiple Indicator Cluster Survey (MICS)                                |            |    |     | x   |      |
| Algeria                  | 1950-2011 | Vital Registration                                                      | x          |    |     |     |      |
| Algeria                  | 1992      | Pan Arab Project for Child Development (PAPCHILD)                       |            |    | x   | x   |      |
| Bahrain                  | 2001      | Census                                                                  |            |    |     | x   |      |
| Bahrain                  | 1985-1999 | WHO Mortality Database                                                  | x          |    |     |     |      |
| Bahrain                  | 1989      | Gulf Child Health Survey                                                |            |    | x   | x   |      |
| Bahrain                  | 1991      | Census                                                                  |            |    |     | x   |      |
| Bahrain                  | 1995      | Gulf Family Health Survey                                               |            |    | x   |     |      |
| Bahrain                  | 1971      | Census                                                                  |            |    |     | x   |      |
| Bahrain                  | 1980-2013 | Vital Registration                                                      | x          |    |     |     |      |
| Egypt                    | 1991      | Pan Arab Project for Child Development (PAPCHILD)                       |            |    | x   | x   |      |
| Egypt                    | 2000      | Demographic and Health Survey (DHS)                                     |            |    | x   | x   |      |
| Egypt                    | 1996      | Demographic and Health Survey (DHS)                                     |            |    | x   |     |      |
| Egypt                    | 2015      | Special Demographic and Health Survey (DHS)                             |            |    |     | x   |      |
| Egypt                    | 2005      | Demographic and Health Survey (DHS)                                     |            |    | x   | x   |      |
| Egypt                    | 1976      | Census                                                                  |            |    |     | x   |      |
| Egypt                    | 1993      | Demographic and Health Survey (DHS)                                     |            |    | x   |     |      |
| Egypt                    | 1984      | Contraceptive Prevalence Survey                                         |            |    |     | x   |      |
| Egypt                    | 1988      | Demographic and Health Survey (DHS)                                     |            |    |     | x   |      |
| Egypt                    | 2003      | Interim Demographic and Health Survey (DHS)                             |            |    | x   | x   |      |
| Egypt                    | 1950-2013 | Vital Registration                                                      | x          |    |     |     |      |
| Egypt                    | 1980      | World Fertility Survey (WFS)                                            |            |    | x   | x   |      |
| Egypt                    | 1995      | Demographic and Health Survey (DHS)                                     |            |    |     | x   |      |
| Egypt                    | 1998      | Interim Demographic and Health Survey (DHS)                             |            |    | x   |     |      |
| Egypt                    | 1992      | Demographic and Health Survey (DHS)                                     |            |    |     | x   |      |
| Egypt                    | 2008      | Demographic and Health Survey (DHS)                                     |            |    | x   | x   |      |
| Egypt                    | 1980      | WHO Mortality Database                                                  | x          |    |     |     |      |
| Egypt                    | 1989      | Demographic and Health Survey (DHS)                                     |            |    | x   |     |      |
| Egypt                    | 2014      | Demographic and Health Survey (DHS)                                     |            |    | x   | x   |      |
| Iran                     | 1984      | Iran Mortality and Fertility Survey 1984                                |            |    | x   |     |      |
| Iran                     | 1974-2011 | Vital Registration                                                      | x          |    |     |     |      |
| Iran                     | 2006      | Census                                                                  |            |    |     | x   |      |
| Iran                     | 1999      | National Demographic and Health Survey                                  |            |    | x   | x   |      |
| Iran                     | 1994      | Iran Mortality and Fertility Survey 1996                                |            |    | x   |     |      |
| Iran                     | 2010      | National Demographic and Health Survey                                  |            |    | x   |     |      |
| Iran                     | 1974      | Iran Population and Health Sample Survey 1974                           |            |    | x   |     |      |
| Iraq                     | 2006      | Multiple Indicator Cluster Survey (MICS)                                |            |    |     | x   |      |
| Iraq                     | 2003      | Iraq Multiple Indicator Rapid Assessment 2004                           |            | x  |     |     |      |
| Iraq                     | 1997      | Census, International Integrated Public Use Microdata Series (IPUMS)    |            |    |     | x   |      |
| Iraq                     | 1999      | Iraq Child and Maternal Mortality Survey 1999                           |            |    | x   | x   |      |
| Iraq                     | 1973      | Iraq Demographic Sample Survey and Sample Registration System 1973-1975 |            | x  |     |     |      |
| Iraq                     | 2007      | Iraq Family Health Survey 2006-2007                                     |            |    | x   |     | x    |

**Appendix Table 23: Under-5 and adult mortality data sources used in GBD 2015**

| Location     | Years     | Source                                                                           | VR/SRS/DSP | HH | CBH | SBH | SIBS |
|--------------|-----------|----------------------------------------------------------------------------------|------------|----|-----|-----|------|
| Iraq         | 1955-2008 | Vital Registration                                                               | x          |    |     |     |      |
| Iraq         | 2006      | Iraq Multiple Cluster Indicator Survey - Complete Birth History Data             |            |    | x   |     |      |
| Iraq         | 2004      | Iraq Multiple Indicator Rapid Assessment 2004                                    |            |    | x   | x   |      |
| Iraq         | 2011      | Mortality in Iraq Associated with the 2003-2011 Invasion and Occupation          |            |    |     |     | x    |
| Iraq         | 1987      | Census                                                                           |            |    |     | x   |      |
| Iraq         | 2004      | Iraq Living Conditions Survey 2004                                               |            |    | x   |     |      |
| Iraq         | 2011      | Multiple Indicator Cluster Survey (MICS)                                         |            |    | x   | x   |      |
| Iraq         | 1976      | Current Life Tables for Iraq and its Rural Urban Areas 1973-1974                 | x          |    |     |     |      |
| Iraq         | 2006      | Iraq Family Health Survey 2006-2007                                              |            |    |     | x   |      |
| Jordan       | 2009      | Interim Demographic and Health Survey (DHS)                                      |            |    | x   | x   |      |
| Jordan       | 1959-1979 | WHO Mortality Database                                                           | x          |    |     |     |      |
| Jordan       | 2012      | Demographic and Health Survey (DHS)                                              |            |    | x   | x   |      |
| Jordan       | 1981      | Demographic Survey                                                               |            |    |     | x   |      |
| Jordan       | 1990      | Demographic and Health Survey (DHS)                                              |            |    | x   | x   |      |
| Jordan       | 1979      | Census                                                                           |            |    |     | x   |      |
| Jordan       | 1988      | Jordan Child Mortality Survey 1988                                               |            |    |     | x   |      |
| Jordan       | 2007      | Demographic and Health Survey (DHS)                                              |            |    | x   | x   |      |
| Jordan       | 1990      | Jordan EPI/CDD and Child Mortality Survey 1990                                   |            |    |     | x   |      |
| Jordan       | 1997      | Demographic and Health Survey (DHS)                                              |            |    | x   | x   | x    |
| Jordan       | 1953-2011 | Vital Registration                                                               | x          |    |     |     |      |
| Jordan       | 1999      | Jordan Annual Fertility Survey 1999                                              |            |    |     | x   |      |
| Jordan       | 2002      | Demographic and Health Survey (DHS)                                              |            |    | x   | x   |      |
| Kuwait       | 1987      | Gulf Child Health Survey                                                         |            |    |     | x   |      |
| Kuwait       | 1996      | Gulf Family Health Survey                                                        |            |    | x   |     |      |
| Kuwait       | 1962-2013 | Vital Registration                                                               | x          |    |     |     |      |
| Kuwait       | 1975      | Census                                                                           |            |    |     | x   |      |
| Kuwait       | 1980      | Census                                                                           |            |    |     | x   |      |
| Lebanon      | 2009      | Lebanon Multiple Indicator Cluster Survey 2009                                   |            |    |     | x   |      |
| Lebanon      | 2000      | Multiple Indicator Cluster Survey (MICS)                                         |            |    |     | x   |      |
| Lebanon      | 1995      | Pan Arab Project for Child Development (PAPCHILD)                                |            | x  |     |     |      |
| Lebanon      | 1996      | Pan Arab Project for Child Development (PAPCHILD)                                |            |    | x   | x   |      |
| Lebanon      | 2004      | Pan Arab Project for Family Health (PAPFAM)                                      |            |    | x   | x   | x    |
| Libya        | 2003      | Multiple Indicator Cluster Survey (MICS)                                         |            |    |     | x   |      |
| Libya        | 1995      | Pan Arab Project for Child Development (PAPCHILD)                                |            |    | x   | x   |      |
| Libya        | 1973      | Census                                                                           |            |    |     | x   |      |
| Libya        | 2007      | Pan Arab Project for Family Health (PAPFAM)                                      |            |    |     | x   |      |
| Libya        | 1972-2008 | Vital Registration                                                               | x          |    |     |     |      |
| Morocco      | 2004      | Census, International Integrated Public Use Microdata Series (IPUMS)             |            |    |     | x   |      |
| Morocco      | 1982      | Census, International Integrated Public Use Microdata Series (IPUMS)             |            |    |     | x   |      |
| Morocco      | 1995      | Special Demographic and Health Survey (DHS)                                      |            |    | x   | x   |      |
| Morocco      | 1992      | Demographic and Health Survey (DHS)                                              |            |    | x   | x   | x    |
| Morocco      | 1997      | Pan Arab Project for Child Development (PAPCHILD)                                |            |    | x   | x   |      |
| Morocco      | 1980      | World Fertility Survey (WFS)                                                     |            |    | x   | x   |      |
| Morocco      | 1987      | Demographic and Health Survey (DHS)                                              |            |    | x   | x   |      |
| Morocco      | 2004      | Demographic and Health Survey (DHS)                                              |            |    | x   |     |      |
| Morocco      | 1989-2007 | Vital Registration                                                               | x          |    |     |     |      |
| Morocco      | 2003      | Demographic and Health Survey (DHS)                                              |            |    |     | x   | x    |
| Morocco      | 1994      | Census, International Integrated Public Use Microdata Series (IPUMS)             |            |    |     | x   |      |
| Morocco      | 2011      | Morocco National Survey on Population and Family Health 2010-2011                |            |    | x   |     |      |
| Palestine    | 2014      | Multiple Indicator Cluster Survey (MICS)                                         |            |    | x   | x   |      |
| Palestine    | 2000-2014 | Vital Registration                                                               | x          |    |     |     |      |
| Palestine    | 2007      | Census                                                                           |            |    |     | x   |      |
| Palestine    | 2010      | Multiple Indicator Cluster Survey (MICS)                                         |            |    | x   | x   |      |
| Palestine    | 2004      | National Demographic and Health Survey                                           |            |    | x   | x   |      |
| Palestine    | 2000      | Multiple Indicator Cluster Survey (MICS)                                         |            |    | x   | x   |      |
| Palestine    | 2006      | Pan Arab Project for Family Health (PAPFAM)                                      |            |    | x   |     |      |
| Palestine    | 1994      | Demographic Survey                                                               |            |    | x   |     |      |
| Palestine    | 1997      | Census, International Integrated Public Use Microdata Series (IPUMS)             |            |    |     | x   |      |
| Palestine    | 2003      | National Demographic and Health Survey                                           |            |    | x   |     |      |
| Oman         | 2009      | WHO Mortality Database                                                           | x          |    |     |     |      |
| Oman         | 1981      | Oman Sociodemographic Survey 1977-1979                                           |            |    |     | x   |      |
| Oman         | 2014      | Multiple Indicator Cluster Survey (MICS)                                         |            |    | x   |     |      |
| Oman         | 1995      | Gulf Family Health Survey                                                        |            |    | x   |     |      |
| Oman         | 1988      | Gulf Child Health Survey                                                         |            |    | x   | x   |      |
| Oman         | 2004-2011 | Vital Registration                                                               | x          |    |     |     |      |
| Oman         | 1975      | Oman Sociodemographic Survey 1975                                                |            |    |     | x   |      |
| Oman         | 1993      | Census                                                                           |            |    |     | x   |      |
| Qatar        | 1998      | Gulf Family Health Survey                                                        |            |    | x   |     |      |
| Qatar        | 1987      | Gulf Child Health Survey                                                         |            |    | x   | x   |      |
| Qatar        | 1981-2012 | Vital Registration                                                               | x          |    |     |     |      |
| Saudi Arabia | 1999-2012 | Vital Registration                                                               | x          | x  |     |     |      |
| Saudi Arabia | 2006      | Saudi Arabia Demographic Research Bulletin 2007                                  | x          |    |     |     |      |
| Saudi Arabia | 1990      | Saudi Arabia Levels, Trends and Differentials of Infant and Child Mortality 1990 |            |    |     | x   |      |
| Saudi Arabia | 1999-2012 | Vital Registration                                                               | x          |    |     |     |      |
| Saudi Arabia | 1988      | Gulf Child Health Survey                                                         |            |    |     | x   |      |
| Saudi Arabia | 2004      | Census                                                                           | x          |    |     |     |      |
| Saudi Arabia | 1996      | Gulf Family Health Survey                                                        |            |    | x   |     |      |
| Sudan        | 2010      | Multiple Indicator Cluster Survey (MICS)                                         |            |    | x   | x   |      |
| Sudan        | 1993      | Pan Arab Project for Child Development (PAPCHILD)                                |            |    | x   | x   |      |
| Sudan        | 1983      | Census                                                                           |            |    |     | x   |      |
| Sudan        | 2006      | Pan Arab Project for Family Health (PAPFAM)                                      |            |    | x   |     |      |
| Sudan        | 1979      | World Fertility Survey (WFS)                                                     |            |    | x   |     |      |
| Sudan        | 1993      | Census                                                                           |            |    |     | x   |      |
| Sudan        | 1990      | Demographic and Health Survey (DHS)                                              |            |    | x   | x   |      |
| Sudan        | 1989      | Demographic and Health Survey (DHS)                                              |            |    |     |     | x    |



**Appendix Table 23: Under-5 and adult mortality data sources used in GBD 2015**

| Location             | Years     | Source                                                               | VR/SRS/DSP | HH | CBH | SBH | SIBS |
|----------------------|-----------|----------------------------------------------------------------------|------------|----|-----|-----|------|
| Sudan                | 2000      | Multiple Indicator Cluster Survey (MICS)                             |            |    |     |     | x    |
| Sudan                | 2008      | Census, International Integrated Public Use Microdata Series (IPUMS) |            |    |     |     | x    |
| Sudan                | 2014      | Multiple Indicator Cluster Survey (MICS)                             |            |    | x   |     |      |
| Syria                | 1994      | Census                                                               |            |    |     |     | x    |
| Syria                | 1992      | Pan Arab Project for Child Development (PAPCHILD)                    |            | x  |     |     |      |
| Syria                | 1964-2010 | Vital Registration                                                   | x          |    |     |     |      |
| Syria                | 1970      | Census                                                               |            |    |     |     | x    |
| Syria                | 2006      | Multiple Indicator Cluster Survey (MICS)                             |            |    |     |     | x    |
| Syria                | 1993      | Pan Arab Project for Child Development (PAPCHILD)                    |            |    | x   | x   |      |
| Syria                | 2001      | Pan Arab Project for Family Health (PAPFAM)                          |            |    | x   | x   |      |
| Syria                | 1978      | World Fertility Survey (WFS)                                         |            |    | x   | x   |      |
| Tunisia              | 1978      | World Fertility Survey (WFS)                                         |            |    | x   | x   |      |
| Tunisia              | 2011      | Multiple Indicator Cluster Survey (MICS)                             |            |    | x   |     |      |
| Tunisia              | 2001      | Pan Arab Project for Family Health (PAPFAM)                          |            |    | x   | x   |      |
| Tunisia              | 2012      | Multiple Indicator Cluster Survey (MICS)                             |            |    |     |     | x    |
| Tunisia              | 1960-2013 | Vital Registration                                                   | x          |    |     |     |      |
| Tunisia              | 1983      | Westinghouse Contraceptive Prevalence Survey (CPS)                   |            |    |     |     | x    |
| Tunisia              | 1984      | Census                                                               |            |    |     |     | x    |
| Tunisia              | 1995      | Pan Arab Project for Child Development (PAPCHILD)                    |            |    | x   | x   |      |
| Tunisia              | 1988      | Demographic and Health Survey (DHS)                                  |            |    | x   | x   |      |
| Turkey               | 2008      | Turkey Demographic and Health Survey                                 |            |    | x   | x   |      |
| Turkey               | 1998      | Demographic and Health Survey (DHS)                                  |            |    | x   | x   |      |
| Turkey               | 2000      | Census, International Integrated Public Use Microdata Series (IPUMS) |            |    |     |     | x    |
| Turkey               | 1970      | Census                                                               |            |    |     |     | x    |
| Turkey               | 1978-1982 | WHO Mortality Database                                               | x          |    |     |     |      |
| Turkey               | 1978      | World Fertility Survey (WFS)                                         |            |    | x   | x   |      |
| Turkey               | 1990      | Census, International Integrated Public Use Microdata Series (IPUMS) |            |    |     |     | x    |
| Turkey               | 2011      | Turkey Infant and Under-5 Mortality Survey 2011                      |            |    |     |     | x    |
| Turkey               | 1993      | Demographic and Health Survey (DHS)                                  |            |    | x   | x   |      |
| Turkey               | 2014      | Turkey Demographic and Health Survey                                 |            |    | x   |     |      |
| Turkey               | 1980      | Census                                                               |            |    |     |     | x    |
| Turkey               | 1989      | Demographic Survey                                                   |            |    |     |     | x    |
| Turkey               | 2004      | Turkey Demographic and Health Survey                                 |            |    | x   | x   |      |
| Turkey               | 1987      | Reproductive Health Survey (RHS)                                     |            |    |     |     | x    |
| Turkey               | 1985      | Census, International Integrated Public Use Microdata Series (IPUMS) |            |    |     |     | x    |
| Turkey               | 2013      | Turkey Demographic and Health Survey                                 |            |    |     |     | x    |
| Turkey               | 1978-2013 | Vital Registration                                                   | x          |    |     |     |      |
| United Arab Emirates | 2004      | United Arab Emirates Statistical Abstract 2005                       |            | x  |     |     |      |
| United Arab Emirates | 2006      | United Arab Emirates Statistical Abstract 2007                       |            | x  |     |     |      |
| United Arab Emirates | 1995-2007 | Vital Registration                                                   | x          |    |     |     |      |
| United Arab Emirates | 1975      | Census                                                               |            |    |     |     | x    |
| United Arab Emirates | 1995      | Gulf Family Health Survey                                            |            |    | x   |     |      |
| United Arab Emirates | 1988      | Gulf Child Health Survey                                             |            |    |     |     | x    |
| Yemen                | 1979      | World Fertility Survey (WFS)                                         |            |    | x   | x   |      |
| Yemen                | 2006      | Multiple Indicator Cluster Survey (MICS)                             |            |    | x   | x   |      |
| Yemen                | 2013      | Demographic and Health Survey (DHS)                                  |            |    | x   | x   |      |
| Yemen                | 1991      | Demographic and Health Survey (DHS)                                  |            |    |     |     | x    |
| Yemen                | 2003      | Pan Arab Project for Family Health (PAPFAM)                          |            |    | x   | x   |      |
| Yemen                | 1992      | Demographic and Health Survey (DHS)                                  |            |    | x   |     |      |
| Yemen                | 1994      | Census                                                               |            |    |     |     | x    |
| Yemen                | 2006      | Yemen Annual Statistical Health Report 2006                          |            |    | x   |     |      |
| Yemen                | 1997      | Demographic and Health Survey (DHS)                                  |            |    | x   |     |      |
| Bangladesh           | 2011      | Demographic and Health Survey (DHS)                                  |            |    |     |     | x    |
| Bangladesh           | 1980-2014 | Vital Registration                                                   | x          |    | x   |     |      |
| Bangladesh           | 2012      | Demographic and Health Survey (DHS)                                  |            |    | x   |     |      |
| Bangladesh           | 2014      | Demographic and Health Survey (DHS)                                  |            |    | x   |     |      |
| Bangladesh           | 2000      | Demographic and Health Survey (DHS)                                  |            |    | x   | x   |      |
| Bangladesh           | 2010      | Bangladesh MMS Study                                                 |            |    |     |     | x    |
| Bangladesh           | 1999      | Demographic and Health Survey (DHS)                                  |            |    |     |     | x    |
| Bangladesh           | 1981      | Contraceptive Prevalence Survey                                      |            |    |     |     | x    |
| Bangladesh           | 2014      | Vital Registration                                                   |            |    | x   |     |      |
| Bangladesh           | 2013      | Multiple Indicator Cluster Survey (MICS)                             |            |    |     |     | x    |
| Bangladesh           | 1974      | Bangladesh Retrospective Survey of Fertility and Mortality 1974      |            |    |     |     | x    |
| Bangladesh           | 1980-2014 | Vital Registration                                                   | x          |    |     |     |      |
| Bangladesh           | 1999      | Special Demographic and Health Survey (DHS)                          |            | x  |     |     |      |
| Bangladesh           | 1997      | Demographic and Health Survey (DHS)                                  |            |    | x   | x   |      |
| Bangladesh           | 2013      | Vital Registration                                                   |            |    | x   |     |      |
| Bangladesh           | 2011      | Census                                                               |            |    | x   |     | x    |
| Bangladesh           | 2001      | National Demographic and Health Survey                               |            |    |     | x   |      |
| Bangladesh           | 2001      | Special Demographic and Health Survey (DHS)                          |            |    |     |     | x    |
| Bangladesh           | 2004      | Demographic and Health Survey (DHS)                                  |            |    | x   | x   |      |
| Bangladesh           | 2008      | Bangladesh MMS Study                                                 |            |    | x   |     |      |
| Bangladesh           | 1994      | Demographic and Health Survey (DHS)                                  |            |    | x   | x   |      |
| Bangladesh           | 1976      | World Fertility Survey (WFS)                                         |            |    | x   | x   |      |
| Bangladesh           | 2007      | Demographic and Health Survey (DHS)                                  |            |    | x   | x   |      |
| Bhutan               | 2010      | Multiple Indicator Cluster Survey (MICS)                             |            |    |     |     | x    |
| Bhutan               | 1994      | Bhutan Health Survey 1994                                            |            |    | x   |     |      |
| Bhutan               | 2005      | Census                                                               |            |    |     |     | x    |
| India                | 1981-1985 | India SRS Compendium of Fertility and Mortality Indicators 1971-1997 | x          |    |     |     |      |
| India                | 2005      | India Human Development Survey (IHDS)                                |            |    | x   | x   |      |
| India                | 1970-1988 | India Sample Registration System Age-Specific Death Rates 1970-2006  | x          |    |     |     |      |
| India                | 1992      | Demographic and Health Survey (DHS)                                  |            |    |     |     | x    |
| India                | 1950-1964 | Vital Registration                                                   | x          |    |     |     |      |
| India                | 1999      | Demographic and Health Survey (DHS)                                  |            |    |     |     | x    |
| India                | 1999      | India District Level Household Survey (DLHS)                         |            |    |     |     | x    |

**Appendix Table 23: Under-5 and adult mortality data sources used in GBD 2015**

| Location     | Years     | Source                                                                       | VR/SRS/DSP | HH | CBH | SBH | SIBS |
|--------------|-----------|------------------------------------------------------------------------------|------------|----|-----|-----|------|
| India        | 1995-2013 | Sample Registration System (Report)                                          | x          |    |     |     |      |
| India        | 1993      | Demographic and Health Survey (DHS)                                          |            |    | x   | x   |      |
| India        | 2011      | Census                                                                       |            |    |     | x   |      |
| India        | 1983-1994 | India Sample Registration System Age- and Sex-Specific Death Rates 1983-1995 | x          |    |     |     |      |
| India        | 2013      | India District Level Household Survey (DLHS)                                 |            |    |     | x   |      |
| India        | 1991      | Census                                                                       |            |    |     | x   |      |
| India        | 2006      | Demographic and Health Survey (DHS)                                          |            |    | x   | x   |      |
| India        | 1981      | Census                                                                       |            |    |     | x   |      |
| India        | 1991      | India Fertility and Mortality Indicators 1991                                | x          |    |     |     |      |
| India        | 2001      | Census                                                                       |            |    |     | x   |      |
| India        | 2008      | India District Level Household Survey (DLHS)                                 |            |    |     | x   |      |
| India        | 2003      | India District Level Household Survey (DLHS)                                 |            |    |     | x   |      |
| India        | 2010      | India SRS Bulletin 2010                                                      | x          |    |     |     |      |
| India        | 2000      | Demographic and Health Survey (DHS)                                          |            |    | x   |     |      |
| Nepal        | 2014      | Multiple Indicator Cluster Survey (MICS)                                     |            |    | x   |     |      |
| Nepal        | 1971      | Census                                                                       |            |    |     | x   |      |
| Nepal        | 2010      | Demographic and Health Survey (DHS)                                          |            |    |     | x   |      |
| Nepal        | 2001      | Census, International Integrated Public Use Microdata Series (IPUMS)         |            | x  |     | x   |      |
| Nepal        | 2013      | Multiple Indicator Cluster Survey (MICS)                                     |            |    |     | x   |      |
| Nepal        | 2005      | Demographic and Health Survey (DHS)                                          |            |    |     | x   |      |
| Nepal        | 1991      | Nepal Fertility, Family Planning, and Health Survey 1991-1992                |            |    | x   | x   |      |
| Nepal        | 2001      | Demographic and Health Survey (DHS)                                          |            |    | x   | x   |      |
| Nepal        | 2006      | Demographic and Health Survey (DHS)                                          |            |    | x   |     | x    |
| Nepal        | 1991      | Census                                                                       |            |    |     | x   |      |
| Nepal        | 2011      | Demographic and Health Survey (DHS)                                          |            |    | x   |     |      |
| Nepal        | 1996      | Demographic and Health Survey (DHS)                                          |            |    | x   | x   |      |
| Nepal        | 1976      | World Fertility Survey (WFS)                                                 |            |    | x   | x   |      |
| Nepal        | 1981      | Census                                                                       |            |    |     | x   |      |
| Pakistan     | 2006      | Pakistan Social and Living Standards Measurement Survey                      |            |    | x   | x   |      |
| Pakistan     | 1968-2007 | Vital Registration                                                           | x          |    |     |     |      |
| Pakistan     | 1973      | Census, International Integrated Public Use Microdata Series (IPUMS)         |            |    |     | x   |      |
| Pakistan     | 1991      | Living Standards Measurement Study (LSMS)                                    |            |    |     | x   |      |
| Pakistan     | 2008      | Pakistan Social and Living Standards Measurement Survey                      |            |    | x   | x   |      |
| Pakistan     | 1985      | Contraceptive Prevalence Survey                                              |            |    |     | x   |      |
| Pakistan     | 1968      | Sample Registration System                                                   | x          |    |     |     |      |
| Pakistan     | 2002      | Pakistan Integrated Household Survey 2001-2002                               |            |    | x   | x   |      |
| Pakistan     | 1991      | Demographic and Health Survey (DHS)                                          |            |    | x   | x   |      |
| Pakistan     | 1981      | Census                                                                       |            |    |     | x   |      |
| Pakistan     | 1984-2007 | Pakistan Demographic Survey                                                  | x          | x  |     |     |      |
| Pakistan     | 1976-1979 | Pakistan Population Growth Survey 1976-1979                                  | x          |    |     |     |      |
| Pakistan     | 1996      | Pakistan Demographic Survey                                                  |            | x  |     |     |      |
| Pakistan     | 2006      | Demographic and Health Survey (DHS)                                          |            |    |     | x   |      |
| Pakistan     | 1984-2007 | Pakistan Demographic Survey                                                  | x          |    |     |     |      |
| Pakistan     | 2013      | Demographic and Health Survey (DHS)                                          |            |    | x   |     |      |
| Pakistan     | 1999      | Pakistan Integrated Household Survey 1998-1999                               |            |    | x   | x   |      |
| Pakistan     | 1975      | World Fertility Survey (WFS)                                                 |            |    | x   | x   |      |
| Pakistan     | 2007      | Demographic and Health Survey (DHS)                                          |            |    | x   |     |      |
| Pakistan     | 1993      | Contraceptive Prevalence Survey                                              |            |    |     | x   |      |
| Pakistan     | 2012      | Demographic and Health Survey (DHS)                                          |            |    |     | x   |      |
| Botswana     | 2006      | Botswana Demographic Survey                                                  |            |    |     | x   |      |
| Botswana     | 1991      | Census                                                                       |            |    |     | x   |      |
| Botswana     | 1996      | Botswana Family Health Survey                                                |            |    |     | x   |      |
| Botswana     | 1988      | Demographic and Health Survey (DHS)                                          |            |    | x   | x   |      |
| Botswana     | 2011      | Census                                                                       |            |    | x   |     |      |
| Botswana     | 2000      | Multiple Indicator Cluster Survey (MICS)                                     |            |    |     | x   |      |
| Botswana     | 2007      | Botswana Family Health Survey                                                |            |    |     | x   |      |
| Lesotho      | 2010      | Demographic and Health Survey (DHS)                                          |            |    | x   |     |      |
| Lesotho      | 2014      | Demographic and Health Survey (DHS)                                          |            |    | x   |     |      |
| Lesotho      | 2001      | Demographic Survey                                                           |            |    |     | x   |      |
| Lesotho      | 2011      | Demographic Survey                                                           |            |    |     | x   |      |
| Lesotho      | 2004      | Demographic and Health Survey (DHS)                                          |            |    |     | x   | x    |
| Lesotho      | 2000      | Multiple Indicator Cluster Survey (MICS)                                     |            |    |     | x   |      |
| Lesotho      | 2009      | Demographic and Health Survey (DHS)                                          |            |    |     | x   | x    |
| Lesotho      | 1977      | World Fertility Survey (WFS)                                                 |            |    | x   | x   |      |
| Lesotho      | 2005      | Demographic and Health Survey (DHS)                                          |            |    | x   |     |      |
| Lesotho      | 1986      | Census                                                                       |            |    |     | x   |      |
| Namibia      | 2013      | Demographic and Health Survey (DHS)                                          |            |    | x   | x   | x    |
| Namibia      | 1991      | Census                                                                       |            |    |     | x   |      |
| Namibia      | 2011      | Census                                                                       |            |    |     | x   |      |
| Namibia      | 1992      | Demographic and Health Survey (DHS)                                          |            |    | x   | x   | x    |
| Namibia      | 2000      | Demographic and Health Survey (DHS)                                          |            |    | x   | x   | x    |
| Namibia      | 2007      | Demographic and Health Survey (DHS)                                          |            |    | x   | x   |      |
| Namibia      | 2001      | Vital Registration                                                           |            | x  |     |     |      |
| Namibia      | 2006      | Demographic and Health Survey (DHS)                                          |            |    |     |     | x    |
| South Africa | 1996-2006 | Census, International Integrated Public Use Microdata Series (IPUMS)         | x          | x  |     |     |      |
| South Africa | 1993      | Living Standards Measurement Study (LSMS)                                    |            |    |     | x   |      |
| South Africa | 1980-1982 | Country Mortality Data 1980-1999                                             | x          |    |     |     |      |
| South Africa | 2006.69   | International Integrated Public Use Microdata Series (IPUMS)                 | x          |    |     |     |      |
| South Africa | 2011      | Census                                                                       | x          | x  |     |     |      |
| South Africa | 1996      | Census, International Integrated Public Use Microdata Series (IPUMS)         |            |    |     | x   |      |
| South Africa | 1998      | Demographic and Health Survey (DHS)                                          |            |    | x   | x   | x    |
| South Africa | 2006      | Census, International Integrated Public Use Microdata Series (IPUMS)         |            | x  |     |     |      |
| South Africa | 2006      | South Africa Community Survey 2007                                           | x          |    |     |     |      |
| South Africa | 1980-2013 | Vital Registration                                                           | x          |    |     |     |      |
| South Africa | 1987      | National Demographic and Health Survey                                       |            |    |     | x   |      |



**Appendix Table 23: Under-5 and adult mortality data sources used in GBD 2015**

| Location      | Years     | Source                                                               | VR/SRS/DSP | HH | CBH | SBH | SIBS |
|---------------|-----------|----------------------------------------------------------------------|------------|----|-----|-----|------|
| South Africa  | 2000      | Census                                                               | x          |    |     |     |      |
| South Africa  | 2010      | South Africa Mortality and Causes of Death 2010                      | x          |    |     |     |      |
| Swaziland     | 2006      | Demographic and Health Survey (DHS)                                  |            |    |     | x   | x    |
| Swaziland     | 2000      | Multiple Indicator Cluster Survey (MICS)                             |            |    |     | x   |      |
| Swaziland     | 2010      | Multiple Indicator Cluster Survey (MICS)                             |            |    | x   | x   |      |
| Swaziland     | 2007      | Demographic and Health Survey (DHS)                                  |            |    | x   |     |      |
| Swaziland     | 2007      | Vital Registration                                                   |            | x  |     |     |      |
| Swaziland     | 1997      | Vital Registration                                                   |            | x  |     |     |      |
| Swaziland     | 2014      | Multiple Indicator Cluster Survey (MICS)                             |            |    | x   |     |      |
| Zimbabwe      | 2014      | Multiple Indicator Cluster Survey (MICS)                             |            |    | x   | x   | x    |
| Zimbabwe      | 1988      | Demographic and Health Survey (DHS)                                  |            |    |     | x   |      |
| Zimbabwe      | 2005      | Demographic and Health Survey (DHS)                                  |            | x  |     | x   | x    |
| Zimbabwe      | 2011      | Demographic and Health Survey (DHS)                                  |            |    | x   | x   |      |
| Zimbabwe      | 2002      | Vital Registration                                                   |            | x  |     |     |      |
| Zimbabwe      | 2012      | Census                                                               |            |    |     | x   |      |
| Zimbabwe      | 2009      | Multiple Indicator Cluster Survey (MICS)                             |            |    | x   | x   |      |
| Zimbabwe      | 2010      | Demographic and Health Survey (DHS)                                  |            |    |     |     | x    |
| Zimbabwe      | 1994      | Demographic and Health Survey (DHS)                                  |            |    | x   | x   | x    |
| Zimbabwe      | 1989      | Demographic and Health Survey (DHS)                                  |            |    | x   |     |      |
| Zimbabwe      | 1990      | WHO Mortality Database                                               | x          |    |     |     |      |
| Zimbabwe      | 2006      | Demographic and Health Survey (DHS)                                  |            | x  | x   |     |      |
| Zimbabwe      | 1990-2002 | Vital Registration                                                   | x          |    |     |     |      |
| Zimbabwe      | 1999      | Demographic and Health Survey (DHS)                                  |            |    | x   | x   | x    |
| Benin         | 2006      | Demographic and Health Survey (DHS)                                  |            |    | x   | x   | x    |
| Benin         | 2001      | Demographic and Health Survey (DHS)                                  |            |    | x   | x   |      |
| Benin         | 2014      | Multiple Indicator Cluster Survey (MICS)                             |            |    | x   |     |      |
| Benin         | 1982      | World Fertility Survey (WFS)                                         |            |    | x   | x   |      |
| Benin         | 1996      | Demographic and Health Survey (DHS)                                  |            |    | x   | x   | x    |
| Benin         | 1992      | Census                                                               |            |    |     | x   |      |
| Benin         | 2012      | Demographic and Health Survey (DHS)                                  |            |    | x   | x   |      |
| Burkina Faso  | 1999      | Demographic and Health Survey (DHS)                                  |            |    | x   | x   |      |
| Burkina Faso  | 2010      | Demographic and Health Survey (DHS)                                  |            |    |     | x   | x    |
| Burkina Faso  | 2011      | Demographic and Health Survey (DHS)                                  |            |    | x   |     |      |
| Burkina Faso  | 1991      | Demographic Survey                                                   |            |    | x   |     |      |
| Burkina Faso  | 1998      | Demographic and Health Survey (DHS)                                  |            |    |     |     | x    |
| Burkina Faso  | 1985      | Census, International Integrated Public Use Microdata Series (IPUMS) |            | x  |     |     |      |
| Burkina Faso  | 1985      | Census                                                               |            |    |     | x   |      |
| Burkina Faso  | 1996      | Census, International Integrated Public Use Microdata Series (IPUMS) |            |    |     | x   |      |
| Burkina Faso  | 1996      | Census                                                               |            |    | x   |     |      |
| Burkina Faso  | 2006      | Multiple Indicator Cluster Survey (MICS)                             |            |    |     | x   |      |
| Burkina Faso  | 1993      | Demographic and Health Survey (DHS)                                  |            |    | x   | x   |      |
| Burkina Faso  | 2006      | Census                                                               |            |    | x   |     |      |
| Burkina Faso  | 2006      | Census, International Integrated Public Use Microdata Series (IPUMS) |            |    |     | x   |      |
| Burkina Faso  | 2014      | DHS Malaria Indicator Survey (MIS)                                   |            |    |     | x   |      |
| Burkina Faso  | 2003      | Demographic and Health Survey (DHS)                                  |            |    | x   | x   | x    |
| Cameroon      | 2005      | Census, International Integrated Public Use Microdata Series (IPUMS) |            |    |     | x   |      |
| Cameroon      | 1991      | Demographic and Health Survey (DHS)                                  |            |    | x   | x   |      |
| Cameroon      | 2004      | Demographic and Health Survey (DHS)                                  |            |    | x   | x   | x    |
| Cameroon      | 1998      | Demographic and Health Survey (DHS)                                  |            |    | x   | x   | x    |
| Cameroon      | 1978      | World Fertility Survey (WFS)                                         |            |    | x   | x   |      |
| Cameroon      | 1987      | Census                                                               |            | x  |     |     |      |
| Cameroon      | 2011      | Demographic and Health Survey (DHS)                                  |            |    | x   | x   | x    |
| Cameroon      | 2000      | Multiple Indicator Cluster Survey (MICS)                             |            |    |     | x   |      |
| Cape Verde    | 2000      | Census                                                               |            |    |     | x   |      |
| Cape Verde    | 1998      | Reproductive Health Survey (RHS)                                     |            |    | x   | x   |      |
| Cape Verde    | 2005      | Demographic and Health Survey (DHS)                                  |            |    | x   | x   |      |
| Cape Verde    | 1955-2012 | Vital Registration                                                   | x          |    |     |     |      |
| Chad          | 2000      | Multiple Indicator Cluster Survey (MICS)                             |            |    |     | x   |      |
| Chad          | 1996      | Demographic and Health Survey (DHS)                                  |            |    |     |     | x    |
| Chad          | 2004      | Demographic and Health Survey (DHS)                                  |            |    | x   | x   | x    |
| Chad          | 2010      | Multiple Indicator Cluster Survey (MICS)                             |            |    |     | x   |      |
| Chad          | 2015      | Demographic and Health Survey (DHS)                                  |            |    | x   |     |      |
| Chad          | 1997      | Demographic and Health Survey (DHS)                                  |            |    | x   | x   |      |
| Cote d'Ivoire | 2011      | Demographic and Health Survey (DHS)                                  |            |    |     |     | x    |
| Cote d'Ivoire | 1986      | Living Standards Measurement Study (LSMS)                            |            |    | x   |     |      |
| Cote d'Ivoire | 2012      | Demographic and Health Survey (DHS)                                  |            |    | x   | x   |      |
| Cote d'Ivoire | 1999      | Demographic and Health Survey (DHS)                                  |            |    | x   | x   |      |
| Cote d'Ivoire | 2005      | DHS AIDS Indicator Survey (AIS)                                      |            |    | x   | x   | x    |
| Cote d'Ivoire | 1985      | Living Standards Measurement Study (LSMS)                            |            |    | x   |     |      |
| Cote d'Ivoire | 1981      | World Fertility Survey (WFS)                                         |            |    | x   | x   |      |
| Cote d'Ivoire | 1979      | Demographic Survey                                                   |            | x  |     | x   |      |
| Cote d'Ivoire | 1987      | Living Standards Measurement Study (LSMS)                            |            |    | x   |     |      |
| Cote d'Ivoire | 1988      | Living Standards Measurement Study (LSMS)                            |            |    | x   |     |      |
| Cote d'Ivoire | 1994      | Demographic and Health Survey (DHS)                                  |            |    | x   | x   | x    |
| The Gambia    | 2006      | Multiple Indicator Cluster Survey (MICS)                             |            |    |     | x   |      |
| The Gambia    | 2000      | Multiple Indicator Cluster Survey (MICS)                             |            |    |     | x   |      |
| The Gambia    | 1990      | Contraceptive Prevalence Survey                                      |            |    | x   | x   |      |
| The Gambia    | 1973      | Census                                                               |            |    |     | x   |      |
| The Gambia    | 2010      | Multiple Indicator Cluster Survey (MICS)                             |            |    |     | x   |      |
| The Gambia    | 2013      | Demographic and Health Survey (DHS)                                  |            |    | x   | x   | x    |
| Ghana         | 2006      | Living Standards Measurement Study (LSMS)                            |            |    |     | x   |      |
| Ghana         | 2007      | Demographic and Health Survey (DHS)                                  |            |    |     |     | x    |
| Ghana         | 2011      | Multiple Indicator Cluster Survey (MICS)                             |            |    | x   | x   |      |
| Ghana         | 2000      | Census, International Integrated Public Use Microdata Series (IPUMS) |            |    |     | x   |      |
| Ghana         | 1999      | Demographic and Health Survey (DHS)                                  |            |    | x   | x   |      |

**Appendix Table 23: Under-5 and adult mortality data sources used in GBD 2015**

| Location              | Years     | Source                                                               | VR/SRS/DSP | HH | CBH | SBH | SIBS |
|-----------------------|-----------|----------------------------------------------------------------------|------------|----|-----|-----|------|
| Ghana                 | 2008      | Demographic and Health Survey (DHS)                                  |            |    | x   | x   |      |
| Ghana                 | 1979      | World Fertility Survey (WFS)                                         |            |    |     | x   |      |
| Ghana                 | 1988      | Demographic and Health Survey (DHS)                                  |            |    | x   | x   |      |
| Ghana                 | 1998      | Living Standards Measurement Study (LSMS)                            |            |    |     | x   |      |
| Ghana                 | 2006      | Multiple Indicator Cluster Survey (MICS)                             |            |    |     | x   |      |
| Ghana                 | 1994      | Demographic and Health Survey (DHS)                                  |            |    | x   |     |      |
| Ghana                 | 1980      | World Fertility Survey (WFS)                                         |            |    | x   |     |      |
| Ghana                 | 2014      | Demographic and Health Survey (DHS)                                  |            |    | x   | x   |      |
| Ghana                 | 2007      | Special Demographic and Health Survey (DHS)                          |            |    | x   | x   |      |
| Ghana                 | 1993      | Demographic and Health Survey (DHS)                                  |            |    |     | x   |      |
| Ghana                 | 2010      | Census, International Integrated Public Use Microdata Series (IPUMS) |            |    |     | x   |      |
| Ghana                 | 2003      | Demographic and Health Survey (DHS)                                  |            |    | x   | x   |      |
| Guinea                | 1999      | Demographic and Health Survey (DHS)                                  |            |    | x   | x   | x    |
| Guinea                | 2005      | Demographic and Health Survey (DHS)                                  |            |    | x   | x   | x    |
| Guinea                | 1955      | Thailand Survey of Population Change                                 | x          |    |     |     |      |
| Guinea                | 2012      | Demographic and Health Survey (DHS)                                  |            |    | x   | x   | x    |
| Guinea                | 1996      | Census, International Integrated Public Use Microdata Series (IPUMS) |            |    |     | x   |      |
| Guinea                | 1954      | Demographic Survey                                                   |            |    |     | x   |      |
| Guinea                | 1992      | Demographic and Health Survey (DHS)                                  |            |    | x   |     |      |
| Guinea-Bissau         | 2010      | Multiple Indicator Cluster Survey (MICS)                             |            |    |     | x   |      |
| Guinea-Bissau         | 2000      | Multiple Indicator Cluster Survey (MICS)                             |            |    |     | x   |      |
| Guinea-Bissau         | 2006      | Multiple Indicator Cluster Survey (MICS)                             |            |    |     | x   |      |
| Guinea-Bissau         | 2014      | Multiple Indicator Cluster Survey (MICS)                             |            |    | x   |     |      |
| Liberia               | 2013      | Demographic and Health Survey (DHS)                                  |            |    | x   | x   | x    |
| Liberia               | 1986      | Demographic and Health Survey (DHS)                                  |            |    |     | x   |      |
| Liberia               | 2006      | Demographic and Health Survey (DHS)                                  |            |    |     |     | x    |
| Liberia               | 2008      | Census, International Integrated Public Use Microdata Series (IPUMS) |            |    |     | x   |      |
| Liberia               | 2009      | DHS Malaria Indicator Survey (MIS)                                   |            |    |     | x   |      |
| Liberia               | 1986      | National Demographic and Health Survey                               |            |    | x   |     |      |
| Liberia               | 2008      | DHS Malaria Indicator Survey (MIS)                                   |            |    | x   |     |      |
| Liberia               | 2007      | Demographic and Health Survey (DHS)                                  |            |    | x   | x   |      |
| Liberia               | 2011      | DHS Malaria Indicator Survey (MIS)                                   |            |    |     | x   |      |
| Mali                  | 2006      | Demographic and Health Survey (DHS)                                  |            |    | x   | x   | x    |
| Mali                  | 1996      | Demographic and Health Survey (DHS)                                  |            |    | x   | x   |      |
| Mali                  | 1987      | Census, International Integrated Public Use Microdata Series (IPUMS) |            | x  |     | x   |      |
| Mali                  | 1987      | Demographic and Health Survey (DHS)                                  |            |    | x   | x   |      |
| Mali                  | 1995      | Demographic and Health Survey (DHS)                                  |            |    |     |     | x    |
| Mali                  | 2013      | Demographic and Health Survey (DHS)                                  |            |    | x   | x   |      |
| Mali                  | 1998      | Census, International Integrated Public Use Microdata Series (IPUMS) |            | x  |     | x   |      |
| Mali                  | 2009      | Census, International Integrated Public Use Microdata Series (IPUMS) |            |    |     | x   |      |
| Mali                  | 2001      | Demographic and Health Survey (DHS)                                  |            |    | x   | x   | x    |
| Mali                  | 2012      | Demographic and Health Survey (DHS)                                  |            |    |     |     | x    |
| Mali                  | 1976      | Vital Registration                                                   |            | x  |     |     |      |
| Mauritania            | 2011      | Multiple Indicator Cluster Survey (MICS)                             |            |    | x   | x   | x    |
| Mauritania            | 1996      | Multiple Indicator Cluster Survey (MICS)                             |            |    |     | x   |      |
| Mauritania            | 2007      | Multiple Indicator Cluster Survey (MICS)                             |            |    |     | x   |      |
| Mauritania            | 1981      | World Fertility Survey (WFS)                                         |            |    | x   | x   |      |
| Mauritania            | 2000      | Demographic and Health Survey (DHS)                                  |            |    |     | x   | x    |
| Mauritania            | 1990      | Pan Arab Project for Child Development (PAPCHILD)                    |            |    | x   | x   |      |
| Mauritania            | 1988      | Census                                                               |            | x  |     | x   |      |
| Mauritania            | 2001      | Demographic and Health Survey (DHS)                                  |            |    | x   |     |      |
| Niger                 | 1998      | Demographic and Health Survey (DHS)                                  |            |    | x   | x   |      |
| Niger                 | 2012      | Demographic and Health Survey (DHS)                                  |            |    | x   | x   | x    |
| Niger                 | 1996      | Multiple Indicator Cluster Survey (MICS)                             |            |    |     | x   |      |
| Niger                 | 1992      | Demographic and Health Survey (DHS)                                  |            |    | x   | x   | x    |
| Niger                 | 2000      | Multiple Indicator Cluster Survey (MICS)                             |            |    |     | x   |      |
| Niger                 | 2006      | Demographic and Health Survey (DHS)                                  |            |    | x   | x   | x    |
| Nigeria               | 2007      | Census, International Integrated Public Use Microdata Series (IPUMS) |            |    |     | x   |      |
| Nigeria               | 2007      | Multiple Indicator Cluster Survey (MICS)                             |            |    |     | x   |      |
| Nigeria               | 2011      | Multiple Indicator Cluster Survey (MICS)                             |            |    |     | x   |      |
| Nigeria               | 1999      | Multiple Indicator Cluster Survey (MICS)                             |            |    |     | x   |      |
| Nigeria               | 2010      | DHS Malaria Indicator Survey (MIS)                                   |            |    | x   | x   |      |
| Nigeria               | 2004      | Nigeria Living Standards Survey 2003-2004                            |            |    |     | x   |      |
| Nigeria               | 2013      | Demographic and Health Survey (DHS)                                  |            |    | x   | x   | x    |
| Nigeria               | 2007      | Nigeria General Household Survey                                     |            |    |     | x   |      |
| Nigeria               | 2003      | Demographic and Health Survey (DHS)                                  |            |    | x   | x   |      |
| Nigeria               | 2008      | Demographic and Health Survey (DHS)                                  |            |    | x   | x   | x    |
| Nigeria               | 1990      | Demographic and Health Survey (DHS)                                  |            |    | x   | x   |      |
| Nigeria               | 2006      | Census, International Integrated Public Use Microdata Series (IPUMS) |            |    |     |     | x    |
| Sao Tome and Principe | 1955-1987 | Vital Registration                                                   | x          |    |     |     |      |
| Sao Tome and Principe | 1991      | Census                                                               |            |    |     | x   |      |
| Sao Tome and Principe | 2000      | Multiple Indicator Cluster Survey (MICS)                             |            |    |     | x   |      |
| Sao Tome and Principe | 2008      | Demographic and Health Survey (DHS)                                  |            |    |     | x   | x    |
| Sao Tome and Principe | 1980      | Census                                                               |            |    |     | x   |      |
| Sao Tome and Principe | 1984-1987 | WHO Mortality Database                                               | x          |    |     |     |      |
| Sao Tome and Principe | 2006      | Multiple Indicator Cluster Survey (MICS)                             |            |    |     | x   |      |
| Sao Tome and Principe | 2009      | Demographic and Health Survey (DHS)                                  |            |    | x   |     |      |
| Senegal               | 2005      | Demographic and Health Survey (DHS)                                  |            |    | x   | x   | x    |
| Senegal               | 1992      | Demographic and Health Survey (DHS)                                  |            |    |     |     | x    |
| Senegal               | 2006      | DHS Malaria Indicator Survey (MIS)                                   |            |    |     | x   |      |
| Senegal               | 1978      | World Fertility Survey (WFS)                                         |            |    | x   | x   |      |
| Senegal               | 1997      | Demographic and Health Survey (DHS)                                  |            |    | x   | x   |      |
| Senegal               | 1986      | Demographic and Health Survey (DHS)                                  |            |    | x   | x   |      |
| Senegal               | 1993      | Demographic and Health Survey (DHS)                                  |            |    | x   | x   |      |
| Senegal               | 2002      | Census, International Integrated Public Use Microdata Series (IPUMS) |            |    |     |     | x    |

**Appendix Table 23: Under-5 and adult mortality data sources used in GBD 2015**

| Location     | Years     | Source                                                               | VR/SRS/DSP | HH | CBH | SBH | SIBS |
|--------------|-----------|----------------------------------------------------------------------|------------|----|-----|-----|------|
| Senegal      | 2013      | Demographic and Health Survey (DHS)                                  |            |    | x   | x   |      |
| Senegal      | 2009      | DHS Malaria Indicator Survey (MIS)                                   |            |    |     | x   |      |
| Senegal      | 2008      | DHS Malaria Indicator Survey (MIS)                                   |            |    | x   |     |      |
| Senegal      | 2014      | Demographic and Health Survey (DHS)                                  |            |    | x   | x   |      |
| Senegal      | 2011      | Demographic and Health Survey (DHS)                                  |            |    | x   | x   |      |
| Sierra Leone | 2013      | Demographic and Health Survey (DHS)                                  |            |    | x   | x   | x    |
| Sierra Leone | 2010      | Multiple Indicator Cluster Survey (MICS)                             |            |    |     | x   |      |
| Sierra Leone | 2000      | Multiple Indicator Cluster Survey (MICS)                             |            |    |     | x   |      |
| Sierra Leone | 2004      | Census, International Integrated Public Use Microdata Series (IPUMS) |            | x  |     | x   |      |
| Sierra Leone | 2008      | Demographic and Health Survey (DHS)                                  |            |    | x   | x   | x    |
| Sierra Leone | 2005      | Multiple Indicator Cluster Survey (MICS)                             |            |    |     | x   |      |
| Togo         | 2013      | Demographic and Health Survey (DHS)                                  |            |    | x   |     | x    |
| Togo         | 2010      | Census                                                               |            |    |     | x   |      |
| Togo         | 2006      | Multiple Indicator Cluster Survey (MICS)                             |            |    |     | x   |      |
| Togo         | 2010      | Multiple Indicator Cluster Survey (MICS)                             |            |    |     | x   |      |
| Togo         | 1961      | Census                                                               |            |    |     | x   |      |
| Togo         | 2014      | Demographic and Health Survey (DHS)                                  |            |    |     | x   |      |
| Togo         | 1988      | Demographic and Health Survey (DHS)                                  |            |    | x   | x   |      |
| Togo         | 1998      | Demographic and Health Survey (DHS)                                  |            |    | x   | x   | x    |
| Burundi      | 1990      | Census                                                               |            |    |     | x   |      |
| Burundi      | 2012      | DHS Malaria Indicator Survey (MIS)                                   |            |    |     | x   |      |
| Burundi      | 2000      | Multiple Indicator Cluster Survey (MICS)                             |            |    |     | x   |      |
| Burundi      | 1999      | Priority Survey                                                      |            |    |     | x   |      |
| Burundi      | 2005      | Multiple Indicator Cluster Survey (MICS)                             |            |    |     | x   |      |
| Burundi      | 2011      | Demographic and Health Survey (DHS)                                  |            |    | x   |     |      |
| Burundi      | 2010      | Demographic and Health Survey (DHS)                                  |            |    |     | x   | x    |
| Burundi      | 1971      | Demographic Survey                                                   |            | x  |     | x   |      |
| Burundi      | 1987      | Demographic and Health Survey (DHS)                                  |            |    | x   | x   |      |
| Comoros      | 1958      | Census                                                               |            | x  |     |     |      |
| Comoros      | 1996      | Demographic and Health Survey (DHS)                                  |            |    | x   | x   |      |
| Comoros      | 2000      | Multiple Indicator Cluster Survey (MICS)                             |            |    |     | x   |      |
| Comoros      | 2012      | Demographic and Health Survey (DHS)                                  |            |    |     |     | x    |
| Comoros      | 1980      | Census                                                               |            |    |     | x   |      |
| Djibouti     | 2006      | Multiple Indicator Cluster Survey (MICS)                             |            |    |     | x   |      |
| Djibouti     | 2002      | Pan Arab Project for Family Health (PAPFAM)                          |            |    | x   | x   |      |
| Djibouti     | 1991      | Demographic Survey                                                   |            | x  |     | x   |      |
| Eritrea      | 1995      | Demographic and Health Survey (DHS)                                  |            |    |     | x   | x    |
| Eritrea      | 2002      | Demographic and Health Survey (DHS)                                  |            |    | x   | x   |      |
| Eritrea      | 1996      | Demographic and Health Survey (DHS)                                  |            |    | x   |     |      |
| Ethiopia     | 2005      | Demographic and Health Survey (DHS)                                  |            |    | x   | x   | x    |
| Ethiopia     | 2010      | Demographic and Health Survey (DHS)                                  |            |    |     |     | x    |
| Ethiopia     | 1991      | Ethiopia National Fertility and Family Survey 1990-1991              |            |    |     | x   |      |
| Ethiopia     | 2007      | Census, International Integrated Public Use Microdata Series (IPUMS) |            |    |     | x   |      |
| Ethiopia     | 2011      | Demographic and Health Survey (DHS)                                  |            |    | x   | x   |      |
| Ethiopia     | 1984      | Census, International Integrated Public Use Microdata Series (IPUMS) |            |    |     | x   |      |
| Ethiopia     | 2000      | Demographic and Health Survey (DHS)                                  |            |    | x   | x   | x    |
| Ethiopia     | 2006      | Census                                                               |            | x  |     |     |      |
| Kenya        | 1989      | Census, International Integrated Public Use Microdata Series (IPUMS) |            |    |     | x   |      |
| Kenya        | 2009      | Census                                                               |            |    |     | x   |      |
| Kenya        | 1998      | Demographic and Health Survey (DHS)                                  |            |    | x   | x   | x    |
| Kenya        | 2008      | Demographic and Health Survey (DHS)                                  |            |    |     |     | x    |
| Kenya        | 2007      | Multiple Indicator Cluster Survey (MICS)                             |            |    |     | x   |      |
| Kenya        | 1969      | Census, International Integrated Public Use Microdata Series (IPUMS) |            |    |     | x   |      |
| Kenya        | 2003      | Demographic and Health Survey (DHS)                                  |            |    | x   | x   | x    |
| Kenya        | 2000      | Multiple Indicator Cluster Survey (MICS)                             |            |    |     | x   |      |
| Kenya        | 1999      | Census, International Integrated Public Use Microdata Series (IPUMS) |            |    |     | x   |      |
| Kenya        | 1994      | Kenya Welfare Monitoring Survey                                      |            |    |     | x   |      |
| Kenya        | 1979      | Census, International Integrated Public Use Microdata Series (IPUMS) |            |    |     | x   |      |
| Kenya        | 2009      | Demographic and Health Survey (DHS)                                  |            |    | x   | x   |      |
| Kenya        | 1989      | Demographic and Health Survey (DHS)                                  |            |    | x   | x   |      |
| Kenya        | 1993      | Demographic and Health Survey (DHS)                                  |            |    | x   | x   |      |
| Kenya        | 1978      | World Fertility Survey (WFS)                                         |            |    | x   | x   |      |
| Kenya        | 2014      | Demographic and Health Survey (DHS)                                  |            |    | x   | x   | x    |
| Madagascar   | 2003      | Demographic and Health Survey (DHS)                                  |            |    |     |     | x    |
| Madagascar   | 1993      | Vital Registration                                                   |            | x  |     |     |      |
| Madagascar   | 2000      | Multiple Indicator Cluster Survey (MICS)                             |            |    |     | x   |      |
| Madagascar   | 1995      | Multiple Indicator Cluster Survey (MICS)                             |            |    |     | x   |      |
| Madagascar   | 1997      | Demographic and Health Survey (DHS)                                  |            |    | x   | x   | x    |
| Madagascar   | 2009      | Demographic and Health Survey (DHS)                                  |            |    | x   | x   |      |
| Madagascar   | 1955-1993 | Vital Registration                                                   | x          |    |     |     |      |
| Madagascar   | 1992      | Demographic and Health Survey (DHS)                                  |            |    | x   | x   | x    |
| Madagascar   | 2004      | Demographic and Health Survey (DHS)                                  |            |    | x   | x   |      |
| Madagascar   | 2012      | Multiple Indicator Cluster Survey (MICS)                             |            |    |     | x   |      |
| Madagascar   | 2008      | Demographic and Health Survey (DHS)                                  |            |    |     |     | x    |
| Malawi       | 2001      | Malawi Diffusion and Ideational Change Project (MDICP) 2001          |            |    |     | x   |      |
| Malawi       | 2012      | DHS Malaria Indicator Survey (MIS)                                   |            |    |     | x   |      |
| Malawi       | 2008      | Census, International Integrated Public Use Microdata Series (IPUMS) |            | x  |     | x   |      |
| Malawi       | 2005      | Demographic and Health Survey (DHS)                                  |            |    | x   |     |      |
| Malawi       | 2014      | Multiple Indicator Cluster Survey (MICS)                             |            |    |     | x   | x    |
| Malawi       | 2006      | Multiple Indicator Cluster Survey (MICS)                             |            |    |     | x   |      |
| Malawi       | 2004      | Demographic and Health Survey (DHS)                                  |            |    |     | x   | x    |
| Malawi       | 2008      | Global Fund Facility Survey                                          |            |    | x   |     |      |
| Malawi       | 1987      | Census, International Integrated Public Use Microdata Series (IPUMS) |            | x  |     | x   |      |
| Malawi       | 2013      | Multiple Indicator Cluster Survey (MICS)                             |            |    | x   |     |      |
| Malawi       | 1984      | Malawi Family Formation Survey 1984                                  |            | x  |     | x   |      |

**Appendix Table 23: Under-5 and adult mortality data sources used in GBD 2015**

| Location    | Years | Source                                                               | VR/SRS/DSP | HH | CBH | SBH | SIBS |
|-------------|-------|----------------------------------------------------------------------|------------|----|-----|-----|------|
| Malawi      | 2010  | Demographic and Health Survey (DHS)                                  |            | x  | x   | x   | x    |
| Malawi      | 2014  | DHS Malaria Indicator Survey (MIS)                                   |            |    |     | x   |      |
| Malawi      | 1977  | Vital Registration                                                   |            | x  |     |     |      |
| Malawi      | 1998  | Census, International Integrated Public Use Microdata Series (IPUMS) |            | x  |     | x   |      |
| Malawi      | 1992  | Demographic and Health Survey (DHS)                                  |            |    | x   | x   | x    |
| Malawi      | 1998  | Malawi Diffusion and Ideational Change Project (MDICP) 1998          |            |    |     | x   |      |
| Malawi      | 1971  | Vital Registration                                                   |            | x  |     |     |      |
| Malawi      | 1982  | Demographic Survey                                                   |            |    |     | x   |      |
| Malawi      | 2000  | Demographic and Health Survey (DHS)                                  |            |    | x   | x   | x    |
| Malawi      | 1971  | Malawi Population Change Survey 1970-1972                            |            | x  |     | x   |      |
| Malawi      | 1995  | Multiple Indicator Cluster Survey (MICS)                             |            |    |     | x   |      |
| Malawi      | 1977  | Census                                                               |            |    |     | x   |      |
| Mozambique  | 1995  | Multiple Indicator Cluster Survey (MICS)                             |            |    |     | x   |      |
| Mozambique  | 2007  | Census                                                               |            | x  |     |     |      |
| Mozambique  | 2008  | Multiple Indicator Cluster Survey (MICS)                             |            |    | x   | x   |      |
| Mozambique  | 1997  | Demographic and Health Survey (DHS)                                  |            |    | x   | x   | x    |
| Mozambique  | 1997  | Vital Registration                                                   |            | x  |     |     |      |
| Mozambique  | 2011  | Demographic and Health Survey (DHS)                                  |            |    | x   | x   | x    |
| Mozambique  | 2009  | DHS AIDS Indicator Survey (AIS)                                      |            |    |     | x   |      |
| Mozambique  | 2003  | Demographic and Health Survey (DHS)                                  |            |    | x   | x   | x    |
| Mozambique  | 2007  | Census, International Integrated Public Use Microdata Series (IPUMS) |            |    |     | x   |      |
| Mozambique  | 1997  | Census, International Integrated Public Use Microdata Series (IPUMS) |            |    |     | x   |      |
| Rwanda      | 2012  | Census                                                               |            |    |     | x   |      |
| Rwanda      | 1970  | Demographic Survey                                                   |            |    |     | x   |      |
| Rwanda      | 1991  | Census, International Integrated Public Use Microdata Series (IPUMS) |            |    |     | x   |      |
| Rwanda      | 2015  | Demographic and Health Survey (DHS)                                  |            |    | x   |     |      |
| Rwanda      | 1983  | World Fertility Survey (WFS)                                         |            |    | x   | x   |      |
| Rwanda      | 2000  | Demographic and Health Survey (DHS)                                  |            |    | x   | x   | x    |
| Rwanda      | 2008  | Interim Demographic and Health Survey (DHS)                          |            |    | x   | x   |      |
| Rwanda      | 1978  | Census                                                               |            |    |     | x   |      |
| Rwanda      | 1992  | Demographic and Health Survey (DHS)                                  |            |    | x   | x   |      |
| Rwanda      | 2002  | Census, International Integrated Public Use Microdata Series (IPUMS) |            |    |     | x   |      |
| Rwanda      | 2005  | Demographic and Health Survey (DHS)                                  |            |    | x   | x   | x    |
| Rwanda      | 2006  | Rwanda Integrated Household Living Conditions Survey (EICV)          |            |    |     | x   |      |
| Rwanda      | 2013  | DHS Malaria Indicator Survey (MIS)                                   |            |    |     | x   |      |
| Rwanda      | 2011  | Demographic and Health Survey (DHS)                                  |            |    | x   | x   |      |
| Rwanda      | 2010  | Demographic and Health Survey (DHS)                                  |            |    |     |     | x    |
| Somalia     | 1999  | Multiple Indicator Cluster Survey (MICS)                             |            |    |     | x   |      |
| Somalia     | 2006  | Multiple Indicator Cluster Survey (MICS)                             |            |    | x   | x   |      |
| South Sudan | 2010  | Multiple Indicator Cluster Survey (MICS)                             |            |    | x   | x   |      |
| South Sudan | 2008  | Census, International Integrated Public Use Microdata Series (IPUMS) |            |    |     | x   |      |
| Tanzania    | 1996  | Demographic and Health Survey (DHS)                                  |            |    | x   | x   | x    |
| Tanzania    | 1992  | Demographic and Health Survey (DHS)                                  |            |    | x   | x   |      |
| Tanzania    | 2012  | DHS AIDS Indicator Survey (AIS)                                      |            |    |     | x   |      |
| Tanzania    | 2004  | DHS AIDS Indicator Survey (AIS)                                      |            |    |     | x   |      |
| Tanzania    | 1967  | Census                                                               |            | x  |     |     |      |
| Tanzania    | 2002  | Census, International Integrated Public Use Microdata Series (IPUMS) |            |    |     | x   |      |
| Tanzania    | 1993  | Living Standards Measurement Study (LSMS)                            |            |    |     | x   |      |
| Tanzania    | 2005  | Demographic and Health Survey (DHS)                                  |            |    | x   |     |      |
| Tanzania    | 1988  | Census, International Integrated Public Use Microdata Series (IPUMS) |            | x  |     | x   |      |
| Tanzania    | 2008  | DHS AIDS Indicator Survey (AIS)                                      |            |    |     | x   |      |
| Tanzania    | 2009  | Demographic and Health Survey (DHS)                                  |            |    |     |     | x    |
| Tanzania    | 2004  | Demographic and Health Survey (DHS)                                  |            |    |     | x   | x    |
| Tanzania    | 1994  | DHS Knowledge, Attitudes and Practices in Health Survey (KAP)        |            |    |     | x   |      |
| Tanzania    | 1999  | Demographic and Health Survey (DHS)                                  |            |    | x   | x   |      |
| Tanzania    | 2010  | Demographic and Health Survey (DHS)                                  |            |    | x   | x   |      |
| Tanzania    | 2007  | DHS AIDS Indicator Survey (AIS)                                      |            |    | x   |     |      |
| Uganda      | 2011  | Demographic and Health Survey (DHS)                                  |            |    | x   | x   | x    |
| Uganda      | 2002  | Census, International Integrated Public Use Microdata Series (IPUMS) |            | x  |     | x   |      |
| Uganda      | 2004  | DHS AIDS Indicator Survey (AIS)                                      |            |    |     | x   |      |
| Uganda      | 1989  | Demographic and Health Survey (DHS)                                  |            |    | x   |     |      |
| Uganda      | 2015  | DHS Malaria Indicator Survey (MIS)                                   |            |    |     | x   |      |
| Uganda      | 2009  | DHS Malaria Indicator Survey (MIS)                                   |            |    | x   | x   |      |
| Uganda      | 1988  | Demographic and Health Survey (DHS)                                  |            |    |     | x   |      |
| Uganda      | 2011  | DHS AIDS Indicator Survey (AIS)                                      |            |    |     | x   |      |
| Uganda      | 2006  | Demographic and Health Survey (DHS)                                  |            |    | x   | x   | x    |
| Uganda      | 1995  | Demographic and Health Survey (DHS)                                  |            |    | x   | x   | x    |
| Uganda      | 1991  | Census, International Integrated Public Use Microdata Series (IPUMS) |            |    |     | x   |      |
| Uganda      | 2001  | Demographic and Health Survey (DHS)                                  |            |    | x   | x   |      |
| Uganda      | 2000  | Demographic and Health Survey (DHS)                                  |            |    |     |     | x    |
| Zambia      | 2001  | Demographic and Health Survey (DHS)                                  |            |    |     |     | x    |
| Zambia      | 2002  | Demographic and Health Survey (DHS)                                  |            |    | x   | x   |      |
| Zambia      | 1990  | Census, International Integrated Public Use Microdata Series (IPUMS) |            |    |     | x   |      |
| Zambia      | 2007  | Demographic and Health Survey (DHS)                                  |            |    | x   | x   | x    |
| Zambia      | 1980  | Census                                                               |            |    |     | x   |      |
| Zambia      | 1997  | Demographic and Health Survey (DHS)                                  |            |    | x   |     |      |
| Zambia      | 1992  | Demographic and Health Survey (DHS)                                  |            |    | x   | x   |      |
| Zambia      | 1996  | Demographic and Health Survey (DHS)                                  |            |    |     | x   | x    |
| Zambia      | 2000  | Zambia Sexual Behavior Survey                                        |            |    |     |     | x    |
| Zambia      | 2000  | Census, International Integrated Public Use Microdata Series (IPUMS) |            |    |     | x   |      |
| Zambia      | 2012  | Zambia Malaria Indicator Survey                                      |            |    |     | x   |      |
| Zambia      | 2013  | Demographic and Health Survey (DHS)                                  |            |    |     | x   | x    |
| Zambia      | 2010  | Census, International Integrated Public Use Microdata Series (IPUMS) |            |    |     | x   |      |
| Zambia      | 2014  | Demographic and Health Survey (DHS)                                  |            |    | x   |     |      |
| Zambia      | 2006  | Zambia Malaria Indicator Survey                                      |            |    |     | x   |      |

**Appendix Table 23: Under-5 and adult mortality data sources used in GBD 2015**

| Location                         | Years | Source                                   | VR/SRS/DSP | HH | CBH | SBH | SIBS |
|----------------------------------|-------|------------------------------------------|------------|----|-----|-----|------|
| Angola                           | 2011  | DHS Malaria Indicator Survey (MIS)       |            |    | x   | x   |      |
| Angola                           | 2001  | Multiple Indicator Cluster Survey (MICS) |            |    |     | x   |      |
| Angola                           | 2007  | DHS Malaria Indicator Survey (MIS)       |            |    |     | x   |      |
| Central African Republic         | 2006  | Multiple Indicator Cluster Survey (MICS) |            |    |     | x   |      |
| Central African Republic         | 2010  | Multiple Indicator Cluster Survey (MICS) |            |    |     | x   |      |
| Central African Republic         | 1995  | Demographic and Health Survey (DHS)      |            |    | x   |     |      |
| Central African Republic         | 1975  | Census                                   |            |    |     | x   |      |
| Central African Republic         | 1988  | Vital Registration                       |            | x  |     |     |      |
| Central African Republic         | 1994  | Demographic and Health Survey (DHS)      |            |    |     | x   | x    |
| Central African Republic         | 2000  | Multiple Indicator Cluster Survey (MICS) |            |    |     | x   |      |
| Congo                            | 1974  | Census                                   |            |    |     | x   |      |
| Congo                            | 2005  | Demographic and Health Survey (DHS)      |            |    | x   | x   | x    |
| Congo                            | 2015  | Multiple Indicator Cluster Survey (MICS) |            |    | x   |     |      |
| Congo                            | 2009  | DHS AIDS Indicator Survey (AIS)          |            |    |     | x   |      |
| Congo                            | 2012  | Demographic and Health Survey (DHS)      |            |    | x   |     |      |
| Congo                            | 2011  | Demographic and Health Survey (DHS)      |            |    |     | x   | x    |
| Democratic Republic of the Congo | 2013  | Demographic and Health Survey (DHS)      |            |    | x   | x   | x    |
| Democratic Republic of the Congo | 2001  | Multiple Indicator Cluster Survey (MICS) |            |    |     | x   |      |
| Democratic Republic of the Congo | 2010  | Multiple Indicator Cluster Survey (MICS) |            |    |     | x   |      |
| Democratic Republic of the Congo | 1995  | Multiple Indicator Cluster Survey (MICS) |            |    |     | x   |      |
| Democratic Republic of the Congo | 2007  | Demographic and Health Survey (DHS)      |            |    | x   | x   | x    |
| Equatorial Guinea                | 2011  | Demographic and Health Survey (DHS)      |            |    | x   |     |      |
| Equatorial Guinea                | 2000  | Multiple Indicator Cluster Survey (MICS) |            |    |     | x   |      |
| Gabon                            | 2000  | Demographic and Health Survey (DHS)      |            |    |     | x   | x    |
| Gabon                            | 2012  | Demographic and Health Survey (DHS)      |            |    | x   | x   | x    |
| Gabon                            | 2001  | Demographic and Health Survey (DHS)      |            |    | x   |     |      |
